# Supplementary material for: Metabolomic profiles associated with a mouse model of antipsychotic-induced food intake and weight gain
Source: PubMed Central journal article supplement (PMC7596057; doi:10.1038/s41598-020-75624-2), 2020-10-29
Supplement: 41598_2020_75624_MOESM1_ESM.pdf [file 41598_2020_75624_MOESM1_ESM.pdf]

## **Metabolomic profiles associated with a mouse model of antipsychotic-induced food intake and weight gain**

Rizaldy C. Zapata<sup>1</sup>, Sara Brin Rosenthal<sup>2</sup>, Kathleen Fisch<sup>2</sup>, Khoi Dao<sup>3</sup>, Mohit Jain<sup>3</sup>, Olivia Osborn\*<sup>1</sup>

<sup>1</sup> Division of Endocrinology and Metabolism, School of Medicine,

<sup>2</sup> Center for Computational Biology & Bioinformatics, School of Medicine,

<sup>3</sup> Departments of Medicine & Pharmacology, University of California San Diego, La Jolla,

CA

92093, USA.

## Supplementary data legends

**Supplemental figure 1. Pathway analysis of the plasma metabolites associated with antipsychotic hyperphagia.** Pathway analysis conducted using Metaboanalyst software determined a significant number of hits related to arachidonic acid metabolism, steroid hormone biosynthesis and retinol metabolism.

**Supplemental Table 1. Plasma metabolites detected in control, olanzapine, minocycline, and co-treated (olanzapine and minocycline) mice.** 7140 metabolites were detected in the plasma, comprising 396 identified metabolites and 6744 unknown metabolites.

**Supplemental Table 2. Differential analysis of plasma metabolite abundance between groups.** Differential analysis revealed that 1188 metabolites were significantly changed between OLZ vs CON adjusted p value < 0.3. Relative abundance is also calculated for these metabolites in OLZ vs MO (minocycline + Olanzapine), and MINO vs CON.

**Supplemental Table 3. All plasma metabolites significantly associated with antipsychotic hyperphagia.** To identify metabolites that are specifically associated with AP-induced hyperphagia and weight gain, we applied another set of filters: metabolites that were significantly changed with OLZ treatment compared with CON and these metabolites should not be differentially changed between CON vs MINO, which revealed 389 plasma metabolites significantly associated with antipsychotic hyperphagia.

**Supplemental Table 4. Known plasma metabolites significantly associated with antipsychotic hyperphagia.** Known metabolites that were significantly changed with OLZ treatment compared with CON and these metabolites should not be differentially changed between CON vs MINO. This revealed 19 'known' metabolites.

**Supplemental Table 5. Hypothalamic metabolites detected in control, olanzapine, minocycline, and co-treated (olanzapine and minocycline) mice.** In the hypothalamus, we detected a total of 414 metabolites of which 92 were identified and 322 unclassified metabolites.

**Supplemental Table 6. Differential analysis of hypothalamic metabolite abundance between groups.** Differential analysis revealed that 151 metabolites were significantly changed between OLZ vs CON adjusted p value < 0.3. Relative abundance changes is also calculated for these metabolites in OLZ vs MO (minocycline + Olanzapine), and MINO vs CON.

**Supplemental Table 7. Hypothalamic metabolites significantly associated with antipsychotic hyperphagia.** To identify hypothalamic metabolites that are specifically associated with AP-induced hyperphagia and weight gain, we applied the same filter that we used with plasma metabolites (metabolites that were significantly changed with OLZ treatment compared with CON and these metabolites should not be differentially changed between CON vs MINO). This revealed just one metabolite, indoxylsulfuric acid, that was increased by ~2 fold by OLZ treatment compared with CON and OLZ+MINO normalized levels to CON range.







# Supplemental Table 1

| Method | Polarity | m/z      | RT   | ID                         | C1       | C3       | C5       | C8       | O1      | O3      | O4       | O7      | O8       | M3       | M4       | M5       | M7       | M8       | MO3     | MO4      | MO6      | MO7      | MO8      |
|--------|----------|----------|------|----------------------------|----------|----------|----------|----------|---------|---------|----------|---------|----------|----------|----------|----------|----------|----------|---------|----------|----------|----------|----------|
| EIC    | Negative | 361.2390 | 3.80 | 10,11-DiHDDPA [M-H]        | 110184   | 94077    | 102473   | 250633   | 79260   | 80414   | 82353    | 88574   | 100228   | 154956   | 96746    | 95581    | 123335   | 71017    | 81914   | 133165   | 88521    | 149821   | 65229    |
| EIC    | Negative | 343.2279 | 5.28 | 10,11-EdDPA [M-H]          | 307369   | 304542   | 167076   | 384531   | 228046  | 243992  | 243992   | 221258  | 502024   | 227783   | 182563   | 309862   | 114576   | 114576   | 233941  | 458258   | 384426   | 201796   | 292606   |
| EIC    | Negative | 405.2286 | 2.00 | 11-Deoxycortisol [M-H]     | 0        | 583097   | 0        | 0        | 159367  | 222279  | 459364   | 0       | 625694   | 178216   | 698963   | 211385   | 629796   | 683482   | 544959  | 761257   | 413262   | 190151   | 461931   |
| EIC    | Negative | 337.2383 | 3.90 | 11,12-diHTeT [M-H]         | 394053   | 305195   | 300908   | 598182   | 269664  | 411109  | 274073   | 269089  | 406023   | 257789   | 347372   | 355557   | 212602   | 212602   | 281677  | 405750   | 299566   | 399014   | 212327   |
| EIC    | Negative | 397.2579 | 3.81 | 11,12-diHTeT [M-H+Ac]      | 246940   | 169357   | 237856   | 137822   | 122945  | 261919  | 122873   | 86014   | 247555   | 141080   | 135823   | 242367   | 262580   | 192182   | 79062   | 572075   | 425369   | 437263   | 200877   |
| EIC    | Negative | 319.2281 | 5.45 | 11,12-EdT [M-H]            | 409944   | 347010   | 220438   | 474101   | 395948  | 412782  | 421246   | 267554  | 343136   | 282133   | 313681   | 498086   | 405410   | 267669   | 413398  | 555876   | 644020   | 379165   | 498565   |
| EIC    | Negative | 377.2330 | 4.03 | 11,12-diHTeT [M-H+Ac]      | 581939   | 349440   | 709340   | 774783   | 472266  | 350655  | 349718   | 842371  | 371712   | 670836   | 339541   | 361298   | 292263   | 708137   | 413855  | 239672   | 447549   | 805997   | 388531   |
| EIC    | Negative | 353.2279 | 2.36 | 11,12-dk-PGF2a [M-H]       | 352459   | 294089   | 285867   | 323664   | 281297  | 321238  | 333971   | 419842  | 308889   | 231889   | 262544   | 297207   | 286420   | 284884   | 282448  | 463914   | 318036   | 302551   | 275656   |
| EIC    | Negative | 367.2122 | 2.17 | 11d-TX82 [M-H]             | 280279   | 205823   | 361691   | 241957   | 105891  | 137845  | 168911   | 124117  | 111229   | 280946   | 158659   | 196841   | 158053   | 147621   | 173522  | 263293   | 156342   | 184688   | 217451   |
| EIC    | Negative | 379.2473 | 4.92 | 12-HETE [M-H+Acetate]      | 316550   | 209749   | 440310   | 458570   | 272391  | 294330  | 325413   | 437362  | 422860   | 318987   | 266955   | 359057   | 366044   | 315267   | 226561  | 786899   | 364161   | 536981   | 226755   |
| EIC    | Negative | 351.2170 | 3.55 | 12-OPDA [M-H+Acetate]      | 326032   | 265838   | 717338   | 766239   | 578074  | 390240  | 563329   | 939637  | 506509   | 568493   | 297563   | 396430   | 321213   | 380111   | 197433  | 240935   | 380275   | 676547   | 359927   |
| EIC    | Negative | 313.2387 | 3.45 | 12,13 diHOME [M-H]         | 2293626  | 1433159  | 4154629  | 10339952 | 2448478 | 2156194 | 3397563  | 4715300 | 3806153  | 3811524  | 2073877  | 3709062  | 3225590  | 2513523  | 756373  | 3453222  | 2973423  | 5695206  | 1554121  |
| EIC    | Negative | 295.2279 | 5.17 | 12,13 EpOME [M-H]          | 3600487  | 2097970  | 3806851  | 3952462  | 2430621 | 2749700 | 3400897  | 3265680 | 5406491  | 2480827  | 1836364  | 3168216  | 2935760  | 1749715  | 1843098 | 4102327  | 3456429  | 3657575  | 2657606  |
| EIC    | Negative | 393.2289 | 3.43 | 12oxo LTB4 [M-H+Acetate]   | 511034   | 181441   | 387946   | 207588   | 92947   | 110817  | 124642   | 93555   | 117542   | 394254   | 91218    | 134938   | 111296   | 136804   | 102034  | 339775   | 140645   | 73454    | 147798   |
| EIC    | Negative | 335.2228 | 5.04 | 12S-HpETE [M-H]            | 684173   | 376716   | 779392   | 686146   | 358103  | 328528  | 444355   | 616736  | 283003   | 764117   | 367760   | 478575   | 359353   | 352320   | 378257  | 283003   | 481707   | 913556   | 352238   |
| EIC    | Negative | 343.2277 | 4.74 | 13 HDoHE [M-H]             | 644289   | 760434   | 433657   | 1096856  | 977887  | 647536  | 934441   | 493652  | 1721460  | 570382   | 509098   | 581068   | 865579   | 304057   | 752222  | 1189581  | 991742   | 665905   | 700153   |
| EIC    | Negative | 295.2279 | 4.50 | 13-HODE [M-H]              | 4299983  | 1414617  | 4299983  | 5397009  | 3304521 | 2306281 | 2392174  | 5549218 | 4517201  | 2293929  | 1579536  | 1900332  | 1903457  | 2858088  | 662475  | 1821840  | 2155996  | 4238027  | 1700218  |
| EIC    | Negative | 293.2125 | 4.59 | 13-oxoODE [M-H]            | 1152010  | 713182   | 1119246  | 1396739  | 1184329 | 935833  | 1369207  | 1086325 | 1660993  | 828983   | 700391   | 889075   | 933859   | 918433   | 651246  | 3203894  | 1130518  | 1312126  | 940928   |
| EIC    | Negative | 361.2390 | 3.70 | 13,14-DiHDDPA [M-H]        | 136600   | 128017   | 140606   | 377107   | 136191  | 112493  | 123524   | 132660  | 139045   | 148106   | 126360   | 151524   | 196159   | 85963    | 95238   | 139055   | 139588   | 214994   | 135496   |
| EIC    | Negative | 393.2288 | 2.89 | 13,14-dihydro-15-keto      | 1692485  | 944831   | 1625943  | 1110748  | 955533  | 393628  | 1566346  | 868082  | 1061549  | 1465596  | 1154254  | 1639381  | 2034402  | 1088530  | 947341  | 1030424  | 1396181  | 2003007  | 1369552  |
| EIC    | Negative | 353.2328 | 2.64 | 13,14-dihydro-15-keto      | 287184   | 132597   | 199242   | 147278   | 258989  | 179873  | 149545   | 84361   | 201672   | 136981   | 120197   | 136800   | 93851    | 125393   | 83631   | 135349   | 142443   | 167362   | 111333   |
| EIC    | Negative | 297.1692 | 1.70 | 13,14-dihydro-15-keto      | 0        | 90745    | 0        | 0        | 41176   | 167912  | 27938    | 0       | 36148    | 0        | 88262    | 30102    | 24226    | 22182    | 35067   | 77628    | 72508    | 0        | 84317    |
| EIC    | Negative | 343.2278 | 5.17 | 13,14-EdPPA [M-H]          | 442502   | 475915   | 246608   | 703643   | 354724  | 519568  | 515253   | 316876  | 497797   | 354759   | 354724   | 383966   | 526645   | 264319   | 439964  | 682563   | 536793   | 314393   | 456932   |
| EIC    | Negative | 293.2125 | 3.98 | 13(S) HTeT [M-H]           | 306257   | 207431   | 620617   | 2153305  | 442437  | 278021  | 367266   | 993831  | 646225   | 593477   | 309508   | 541801   | 505702   | 279223   | 147801  | 459789   | 438611   | 960926   | 196983   |
| EIC    | Negative | 353.2312 | 4.03 | 13(S) HTeT [M-H+Acetate]   | 382256   | 377393   | 988953   | 2275723  | 764250  | 542475  | 638451   | 1612416 | 1275105  | 990811   | 499698   | 874345   | 760474   | 260008   | 136296  | 882683   | 594087   | 1385124  | 272657   |
| EIC    | Negative | 353.2312 | 4.14 | 13(S) HTeT [M-H+Acetate]   | 1542332  | 1280941  | 2846920  | 3188959  | 2091430 | 1446516 | 1734070  | 353117  | 2244691  | 2299384  | 1366411  | 1404617  | 1401719  | 2529408  | 991760  | 1168974  | 1923854  | 3193435  | 1728637  |
| EIC    | Negative | 309.2074 | 4.12 | 13S-HpETE [M-H]            | 1447036  | 826542   | 1933968  | 790240   | 704944  | 1070858 | 684083   | 1495917 | 359340   | 1432233  | 643030   | 832797   | 528110   | 1328063  | 1077536 | 449221   | 659903   | 1593211  | 1125808  |
| EIC    | Negative | 395.2439 | 3.32 | 14,15-diHETE [M-H+Acetate] | 2057452  | 987304   | 2602963  | 3154710  | 599781  | 653017  | 947956   | 1359623 | 887347   | 1521060  | 928264   | 1450383  | 1377365  | 1004703  | 824984  | 1266172  | 1467590  | 1799418  | 937305   |
| EIC    | Negative | 381.2625 | 5.71 | 15-oxoEDE [M-H+Acetate]    | 384013   | 395660   | 1060273  | 1009331  | 759630  | 492719  | 693906   | 1144626 | 898832   | 607471   | 325316   | 443574   | 447547   | 380839   | 322274  | 370276   | 466702   | 792041   | 364013   |
| EIC    | Negative | 395.2441 | 2.92 | 15-epi-PGA1 [M-H+Acetate]  | 2328182  | 2725766  | 1650420  | 129116   | 2572673 | 2242925 | 136995   | 2992421 | 135174   | 171020   | 150917   | 144463   | 2511359  | 1947553  | 2753180 | 118918   | 2319562  | 2760071  | 2429857  |
| EIC    | Negative | 379.2472 | 4.62 | 15-HETE [M-H+Acetate]      | 565953   | 345499   | 1000039  | 1134207  | 556696  | 403331  | 591110   | 1142900 | 657384   | 1063251  | 598084   | 620984   | 634938   | 625082   | 186682  | 672206   | 622146   | 1117980  | 511670   |
| EIC    | Negative | 317.2124 | 4.14 | 15(S) HEPE [M-H]           | 20792812 | 18380351 | 21203246 | 19235856 | 7055493 | 4661397 | 11604355 | 7836969 | 10939718 | 11994421 | 12324922 | 19866059 | 19268476 | 13022391 | 1717709 | 16502979 | 16657888 | 13171287 | 11401453 |
| EIC    | Negative | 377.2332 | 4.14 | 15(S) HEPE [M-H+Acetate]   | 875000   | 755831   | 959645   | 811631   | 349178  | 300705  | 502441   | 425053  | 508450   | 543675   | 821569   | 779515   | 531042   | 785155   | 710235  | 631672   | 562366   | 488630   |          |
| EIC    | Negative | 315.1967 | 4.16 | 15d PGA2 [M-H]             | 2090173  | 862850   | 3082886  | 2274975  | 479086  | 905458  | 925508   | 859998  | 770614   | 3083649  | 1463601  | 1328996  | 1481537  | 1103210  | 473741  | 1214231  | 1425080  | 1648407  | 1372481  |
| EIC    | Negative | 393.2288 | 3.23 | 15d PGD2 [M-H+Acetate]     | 181896   | 139276   | 214516   | 206588   | 131807  | 106397  | 178664   | 141971  | 215728   | 159677   | 120657   | 152183   | 145289   | 125204   | 115362  | 158750   | 152535   | 150537   | 149280   |
| EIC    | Negative | 315.1967 | 4.02 | 15d PGJ2 [M-H]             | 16241493 | 7544009  | 32205244 | 18498521 | 4789559 | 3653307 | 10586273 | 9297297 | 7402762  | 12333125 | 12060375 | 11555030 | 15603887 | 8744897  | 4215823 | 1105622  | 11903671 | 14782492 | 21605182 |
| EIC    | Negative | 351.2180 | 2.28 | 15R-PGD2 [M-H]             | 788133   | 389797   | 748197   | 921068   | 148577  | 254640  | 264825   | 242077  | 234271   | 1259627  | 333869   | 411468   | 386479   | 413367   | 310527  | 418353   | 432120   | 625347   | 583142   |
| EIC    | Negative | 343.2279 | 4.64 | 16,17-DiHODE [M-H]         | 1530218  | 1287601  | 351523   | 4471771  | 1323118 | 1278769 | 1031396  | 1319222 | 5374942  | 6202483  | 730855   | 1611331  | 1278769  | 1160111  | 1641366 | 1131156  | 5390500  | 3685756  | 1987571  |
| EIC    | Negative | 379.2477 | 4.34 | 16-HETE [M-H+Acetate]      | 434730   | 571357   | 425587   | 361568   | 429488  | 624809  | 482912   | 416416  | 734406   | 478962   | 665502   | 576791   | 533837   | 413139   | 194724  | 642003   | 699368   | 271766   | 618311   |
| EIC    | Negative | 361.2390 | 3.63 | 16,17-DiHDDPA [M-H]        | 317293   | 350832   | 352401   | 941011   | 371263  | 167149  | 292527   | 387799  | 309768   | 538065   | 429992   | 601407   | 184341   | 258992   | 184341  | 258992   | 343914   | 526057   | 1995252  |
| EIC    | Negative | 319.2279 | 4.31 | 17-HETE [M-H]              | 5056180  | 1138791  | 5168089  | 3479636  | 669300  | 876685  | 1182069  | 803452  | 708298   | 4899975  | 1438793  | 1369692  | 1723464  | 1240760  | 1080644 | 1392681  | 1729462  | 2396035  | 1237051  |
| EIC    | Negative | 379.2480 | 4.40 | 17-HETE [                  |          |          |          |          |         |         |          |         |          |          |          |          |          |          |         |          |          |          |          |

|         |          |          |      |                         |            |           |            |           |           |            |           |            |           |            |           |           |           |           |           |           |           |           |           |
|---------|----------|----------|------|-------------------------|------------|-----------|------------|-----------|-----------|------------|-----------|------------|-----------|------------|-----------|-----------|-----------|-----------|-----------|-----------|-----------|-----------|-----------|
| fpHILIC | Positive | 241.1292 | 3.19 | ANSERINE                | 6317116    | 3952579   | 3364399    | 5090608   | 3165917   | 5322522    | 3428434   | 2837730    | 3752768   | 3623189    | 3991477   | 4152607   | 4115541   | 3929855   | 3834844   | 5100988   | 3256326   | 4812912   | 3331111   |
| fpHILIC | Negative | 187.0378 | 2.71 | ARABITOL(M+Cl)RIBITC    | 2917426    | 1949397   | 2218371    | 3444990   | 2283702   | 2975423    | 2433880   | 2911692    | 3613314   | 2484500    | 1993545   | 2211263   | 2382474   | 1865425   | 1440727   | 2564448   | 2273650   | 2718796   | 1995515   |
| EIC     | Negative | 311.2957 | 6.72 | ARACHIDATE[M+H]         | 6494117    | 10616147  | 8403271    | 12905934  | 14284889  | 9371361    | 13138705  | 10595053   | 8954705   | 12805066   | 12732307  | 16705353  | 10670212  | 13623811  | 13198990  | 7567970   | 12934813  | 15138816  | 11255206  |
| EIC     | Negative | 303.2327 | 6.44 | Arachidonic Acid [M+H]  | 279097984  | 286350250 | 74770048   | 308100898 | 272181760 | 240106265  | 305291285 | 296875285  | 273160024 | 199873177  | 266454207 | 273219723 | 291855651 | 234738924 | 241612353 | 281442482 | 281256126 | 23527673  | 270570187 |
| EIC     | Negative | 303.2327 | 6.58 | Arachidonic Acid [M+H]  | 2100065    | 3063116   | 1586917    | 3011277   | 3780460   | 3251577    | 4057548   | 2929640    | 2266028   | 2430767    | 3943136   | 4025696   | 4338848   | 3511353   | 3654571   | 4131778   | 4952532   | 3968987   | 3698437   |
| fpHILIC | Negative | 131.0463 | 3.50 | ASPARAGINE              | 12893349   | 6797381   | 8569788    | 6763466   | 4573566   | 4841557    | 3869839   | 5573223    | 3800565   | 8282181    | 6826062   | 7131154   | 7161180   | 6778168   | 12941841  | 8296191   | 5358340   | 9419360   | 3452519   |
| fpHILIC | Positive | 133.0605 | 3.50 | ASPARAGINE              | 12846199   | 10654547  | 11954843   | 7263961   | 5490428   | 6332984    | 5959176   | 6741955    | 6347364   | 9251476    | 7288003   | 7907089   | 8987410   | 10829127  | 14980068  | 10079335  | 7349610   | 10835011  | 8772231   |
| fpHILIC | Negative | 113.0357 | 3.50 | ASPARAGINE(M+H2O-H)     | 1722506    | 889920    | 1280494    | 1053317   | 662456    | 760243     | 625874    | 876086     | 637181    | 1529235    | 1400394   | 1110687   | 1117921   | 1129987   | 2045107   | 1374557   | 859417    | 1511322   | 551525    |
| EIC     | Negative | 407.2805 | 2.75 | β-Muricholic Acid [M+H] | 169281174  | 19474887  | 198073416  | 100097636 | 30051720  | 39170150   | 20002242  | 151853885  | 37012646  | 5853435    | 299348    | 110109    | 6630086   | 447054    | 113141    | 90532     | 65572     | 3922362   | 542283    |
| EIC     | Negative | 467.3020 | 2.75 | β-Muricholic Acid [M+H] | 77307030   | 9343046   | 86292364   | 44953376  | 14348556  | 17484424   | 9095656   | 71806776   | 17342814  | 2809515    | 341060    | 225885    | 3032147   | 399553    | 268196    | 205585    | 219834    | 1954376   | 534134    |
| EIC     | Negative | 339.3269 | 6.86 | Behenic Acid [M+H]      | 128890     | 163904    | 136114     | 192930    | 158334    | 171559     | 208990    | 163856     | 157665    | 245209     | 221247    | 350244    | 231549    | 253726    | 261656    | 167803    | 246622    | 333741    | 224047    |
| fpHILIC | Negative | 116.0717 | 2.28 | BETAINE                 | 7882849    | 3905292   | 6183611    | 5480663   | 4164353   | 5467874    | 4392542   | 5442712    | 2831511   | 5429602    | 3292554   | 3717558   | 3354480   | 2254425   | 3374708   | 3574619   | 3432685   | 5689481   | 2423437   |
| fpHILIC | Positive | 118.0863 | 2.28 | BETAINE                 | 1197446912 | 856638080 | 1077841920 | 970940992 | 922274496 | 1021024640 | 939321792 | 1027562496 | 732770752 | 1008540224 | 804361792 | 844726592 | 809894336 | 612896192 | 746776704 | 776748416 | 813261440 | 977769024 | 663242944 |
| fpHILIC | Positive | 140.0681 | 2.28 | BETAINE(M+Na)           | 1657798    | 3112809   | 3317566    | 3387178   | 3094878   | 3786097    | 2694902   | 3458880    | 1754455   | 2842474    | 1921976   | 2291579   | 2359401   | 2214164   | 2668413   | 2171347   | 1660126   | 3711379   | 1360877   |
| fpHILIC | Negative | 225.0993 | 3.63 | CARNOSINE               | 2608349    | 1271185   | 1697302    | 2046413   | 1117139   | 1413814    | 1078333   | 888614     | 707238    | 1924403    | 1585195   | 1648291   | 1545421   | 983667    | 1044095   | 1425717   | 1118335   | 1002640   | 1076657   |
| fpHILIC | Positive | 227.1134 | 3.63 | CARNOSINE               | 8446045    | 3889466   | 4491539    | 5913339   | 2775701   | 5532052    | 3759743   | 2389121    | 3859266   | 5258414    | 4606140   | 5083266   | 5081354   | 3801713   | 3348933   | 5622241   | 3865312   | 3366945   | 5501348   |
| fpHILIC | Positive | 249.0955 | 3.63 | CARNOSINE(M+Na)         | 978852     | 518241    | 709660     | 903040    | 476875    | 556635     | 489436    | 467177     | 385235    | 888570     | 716013    | 741594    | 707317    | 472049    | 485601    | 666741    | 492721    | 514050    | 577095    |
| EIC     | Negative | 391.2859 | 3.68 | Chenodeoxycholic acid   | 23690433   | 1137086   | 36650252   | 5955779   | 3258109   | 1946589    | 3384821   | 10523079   | 1266596   | 418387     | 16264     | 44732     | 174821    | 0         | 20084     | 0         | 298726    | 79676     |           |
| EIC     | Negative | 451.3070 | 3.68 | Chenodeoxycholic acid   | 67123118   | 3270221   | 106807504  | 18238944  | 9991295   | 5765890    | 9986023   | 31003785   | 3836998   | 1125647    | 79134     | 84425     | 470817    | 72409     | 68122     | 84759     | 38790     | 873505    | 151506    |
| fpHILIC | Negative | 191.0197 | 4.72 | CITRATE                 | 139428784  | 93197952  | 96307032   | 115063464 | 106547232 | 143562208  | 100517312 | 98689088   | 119337632 | 91292784   | 96558808  | 98500064  | 99044648  | 99422136  | 88094200  | 120587600 | 92102672  | 103995624 | 95811264  |
| fpHILIC | Negative | 213.0017 | 4.72 | CITRATE (M+Na-2H)       | 546853     | 578444    | 538485     | 688860    | 621380    | 571942     | 586110    | 641885     | 667429    | 652330     | 698799    | 609261    | 681761    | 689180    | 710985    | 618667    | 630240    | 632462    | 723587    |
| fpHILIC | Positive | 236.9983 | 4.71 | CITRATE(M+2Na-H)        | 878112     | 1007371   | 992789     | 1148327   | 1131496   | 1138396    | 1254517   | 1297759    | 1250876   | 1265376    | 1268862   | 1268858   | 1399844   | 1288979   | 1304413   | 1365508   | 1385786   | 1224407   |           |
| fpHILIC | Positive | 215.0161 | 4.71 | CITRATE(M+Na)           | 1578021    | 1086213   | 1328043    | 1853349   | 1939899   | 2771902    | 1627818   | 1419514    | 1854878   | 1330146    | 1624279   | 1244551   | 1270457   | 1420212   | 972667    | 2286170   | 1189397   | 1558260   | 1243830   |
| fpHILIC | Positive | 176.1026 | 3.71 | CITRULLINE              | 63703408   | 56758932  | 64275536   | 65868912  | 72690504  | 88680928   | 79811728  | 63848400   | 69098224  | 62754060   | 56473324  | 64741752  | 54878736  | 44534568  | 64566720  | 68590416  | 49969252  | 53232748  | 48261684  |
| fpHILIC | Negative | 174.0883 | 3.71 | CITRULLINE              | 16926856   | 13622335  | 13972847   | 12944227  | 15362122  | 17464784   | 14450564  | 12923574   | 11404907  | 12541884   | 12894065  | 12084766  | 11697424  | 9591678   | 14052641  | 13999587  | 12366599  | 12673760  | 11127372  |
| fpHILIC | Negative | 196.0704 | 3.72 | CITRULLINE (M+Na-2H)    | 628637     | 706523    | 727332     | 679623    | 6567123   | 651375     | 634752    | 657496     | 666037    | 629632     | 675534    | 730361    | 614733    | 701049    | 703968    | 643663    | 641659    | 553117    |           |
| fpHILIC | Positive | 202.0663 | 3.72 | CITRULLINE(M+2Na-H)     | 568566     | 651310    | 688258     | 704453    | 772695    | 634475     | 644545    | 756895     | 565885    | 834261     | 761908    | 764454    | 746488    | 661163    | 728735    | 671161    | 721430    | 764077    | 629111    |
| fpHILIC | Positive | 198.0856 | 3.72 | CITRULLINE(M+Na)        | 12874030   | 13213772  | 13942743   | 13801182  | 14904485  | 14640567   | 14517182  | 13902787   | 14317192  | 14106111   | 13561146  | 14341663  | 13759940  | 12095453  | 15190483  | 14277701  | 12488013  | 13441811  | 12132001  |
| EIC     | Negative | 345.0705 | 1.87 | CORTEXOLONE [M+H]       | 40254      | 175719    | 0          | 0         | 58284     | 100438     | 137084    | 0          | 205386    | 0          | 201247    | 73045     | 225907    | 220428    | 188373    | 291716    | 126189    | 0         | 206443    |
| EIC     | Negative | 405.2285 | 1.87 | CORTEXOLONE (M+H+Ac)    | 13827269   | 47507340  | 2250432    | 3559977   | 11235558  | 20517681   | 35246986  | 2212124    | 50981536  | 1737051    | 5561763   | 17074820  | 54872334  | 58984682  | 46116788  | 60480451  | 34060787  | 4302583   | 42522583  |
| EIC     | Negative | 361.2018 | 1.45 | CORTISOL [M+H]          | 0          | 31250     | 0          | 0         | 116111    | 44387      | 79700     | 0          | 69268     | 0          | 40429     | 0         | 21692     | 162454    | 80463     | 80398     | 26488     | 0         | 132913    |
| fpHILIC | Negative | 130.0622 | 3.36 | CREATINE                | 8920123    | 8032879   | 4421572    | 3826605   | 6681534   | 8688202    | 6355983   | 6001655    | 8501108   | 3493709    | 4511170   | 6260162   | 7443535   | 6505364   | 7459436   | 9385311   | 6438643   | 6410756   | 3740799   |
| fpHILIC | Positive | 132.0768 | 3.37 | CREATINE                | 905958272  | 807127872 | 548336768  | 50986368  | 632487040 | 837678720  | 603247872 | 708904704  | 737437056 | 477395456  | 525010016 | 641353024 | 736034240 | 771633856 | 785265152 | 868057472 | 619840640 | 769910064 | 481608416 |
| fpHILIC | Positive | 154.0596 | 3.37 | CREATINE(M+Na)          | 1074096    | 1520606   | 993972     | 929638    | 1401770   | 1730106    | 1041304   | 1362034    | 1586639   | 803707     | 1154215   | 1278578   | 1364018   | 1712766   | 1405494   | 1542811   | 1380042   | 1370213   | 1027222   |
| fpHILIC | Negative | 242.0786 | 2.61 | CYTIDINE                | 802499     | 422705    | 325700     | 794990    | 402394    | 662700     | 461389    | 501664     | 404632    | 466125     | 307714    | 617814    | 478013    | 369214    | 444571    | 810671    | 460941    | 525590    | 624559    |
| fpHILIC | Positive | 244.0919 | 2.62 | CYTIDINE                | 12768348   | 8711554   | 5861432    | 12636649  | 7915307   | 13371811   | 7816389   | 8088312    | 12292029  | 8409480    | 6687174   | 11965852  | 9347790   | 6753963   | 8054861   | 12060288  | 7189578   | 9517051   | 7112551   |
| fpHILIC | Negative | 278.0548 | 2.61 | CYTIDINE(M+Cl)          | 2642578    | 1716414   | 1206037    | 2478733   | 1692305   | 2560751    | 1860725   | 2035956    | 2129171   | 1400997    | 2059250   | 2019822   | 1597483   | 1874675   | 2010218   | 1830753   | 2017026   | 1702599   |           |
| fpHILIC | Positive | 266.0732 | 2.61 | CYTIDINE(M+Na)          | 1774218    | 1307568   | 953544     | 2080553   | 1397684   | 2072617    | 1304759   | 1434804    | 2088950   | 1442631    | 1102125   | 1926592   | 1562198   | 1094208   | 1259585   | 1992065   | 1293706   | 1513412   | 1366366   |
| fpHILIC | Positive | 112.0507 | 2.22 | CYTOSINE                | 10664462   | 8099069   | 10767831   | 11903500  | 9125440   | 11568850   | 8319314   | 9596635    | 10268833  | 1066465    | 10344922  | 10357358  | 9872386   | 8229079   | 6563972   | 8982356   | 7245700   | 8397223   | 8396331   |
| fpHILIC | Positive | 159.0274 | 2.05 | D-GLUCURONOLACTON       | 2633330    | 1184890   | 3218257    | 527901    | 7017837   | 5985480    | 2556776   | 617601     | 4641355   | 836051     | 38670     | 48402     | 4530093   | 4977155   | 0         | 54319     | 5994378   | 66166     | 0         |
| fpHILIC | Positive | 162.0756 | 3.18 | D-MANNOSAMINE[M+H]      | 914632     | 735359    | 972185     | 914546    | 806629    | 1043300    | 974304    | 797687     | 771152    | 782898     | 743711    | 704526    | 749777    | 615699    | 731183    | 688680    | 695389    | 891618    | 668631    |
| fpHILIC | Negative | 229.0117 | 4.03 | D-RIBOSE-5-PHOSPHAT     | 1135162    | 373902    | 219271     | 300856    | 663912    | 824540     | 527752    | 298857     | 1069304   | 204798     | 229450    | 540808    | 460608    | 702979    | 467262    | 570991    | 1191701   | 510996    | 715395    |
| EIC     | Negative | 367.2120 | 1.32 | d16-D PGF1α [M+H]       | 469748     | 101249    | 0          | 0         | 24449     | 36054      | 51034     | 0          | 28425     | 179986     | 108102    | 75121     | 64373     | 104465    | 46655     | 89819     | 109604    | 0         | 64871     |
| EIC     | Negative | 391.2859 | 3.85 | Deoxycholic Acid [M+H]  | 180539560  | 32030821  | 166167883  | 125196938 | 52062801  | 40074616   | 54557476  | 122977693  | 15999898  | 58831555   | 5953162   | 3491762   | 5037061   | 160435    | 1029400   | 1790295   | 839702    | 1388791   | 9023240   |
| EIC     | Negative | 451.3069 | 3.85 | Deoxycholic Acid [M+H]  | 43479769   | 8118852   | 42206422   | 31015428  | 12812877  | 10288544   | 14228485  | 2910       |           |            |           |           |           |           |           |           |           |           |           |

|     |          |          |      |                       |          |         |          |          |          |         |         |          |          |          |         |          |         |           |         |          |          |          |         |
|-----|----------|----------|------|-----------------------|----------|---------|----------|----------|----------|---------|---------|----------|----------|----------|---------|----------|---------|-----------|---------|----------|----------|----------|---------|
| EIC | Negative | 335.2231 | 3.32 | EIC_171               | 2673538  | 1169098 | 3137382  | 2480717  | 530521   | 606435  | 957268  | 1011401  | 474746   | 1877509  | 994787  | 1368732  | 1263349 | 1223011   | 1050985 | 1240207  | 1621477  | 1614961  | 1174766 |
| EIC | Negative | 337.2383 | 3.73 | EIC_181               | 351590   | 237810  | 347843   | 686234   | 328855   | 316747  | 292905  | 386339   | 287076   | 464120   | 256601  | 404361   | 351858  | 163986    | 206308  | 399163   | 287459   | 496863   | 176921  |
| EIC | Negative | 337.2382 | 3.54 | EIC_182               | 634861   | 408395  | 677888   | 1751911  | 524664   | 530552  | 596919  | 736105   | 629998   | 827198   | 519749  | 930662   | 762831  | 250328    | 330776  | 629937   | 623937   | 1006354  | 285654  |
| EIC | Negative | 341.2334 | 3.69 | EIC_184               | 976933   | 402623  | 989957   | 642891   | 546527   | 608659  | 816788  | 1068580  | 168493   | 575431   | 372692  | 469362   | 319598  | 183500    | 259528  | 263785   | 219583   | 788424   | 342401  |
| EIC | Negative | 343.2277 | 4.42 | EIC_193;EIC_195       | 542395   | 602545  | 319821   | 710064   | 562665   | 475637  | 616113  | 335029   | 1126065  | 469053   | 462388  | 565900   | 671010  | 215074    | 620983  | 978298   | 742474   | 458626   | 611652  |
| EIC | Negative | 343.2277 | 4.20 | EIC_198;EIC_201       | 1800099  | 1707986 | 1626050  | 4858218  | 1707811  | 1669193 | 1454534 | 2022361  | 2631937  | 2760554  | 1649230 | 3433258  | 2496957 | 971435    | 1301699 | 2402991  | 2031041  | 2572346  | 1300091 |
| EIC | Negative | 295.2279 | 4.37 | EIC_200               | 7600328  | 5319601 | 11868138 | 9516957  | 8132087  | 7033492 | 7916484 | 10062917 | 7858021  | 6645544  | 5086729 | 5490204  | 5462019 | 109277753 | 3305389 | 9499134  | 7596666  | 10238852 | 6780080 |
| EIC | Negative | 295.2279 | 4.43 | EIC_200;EIC_21        | 5868100  | 3741927 | 10522118 | 5638066  | 5031159  | 4415555 | 6123265 | 6380718  | 5475788  | 4830318  | 3883324 | 3941239  | 3338253 | 8185164   | 2355467 | 7277939  | 5308954  | 7836805  | 4331652 |
| EIC | Negative | 349.2023 | 1.73 | EIC_219               | 4661361  | 1121679 | 2632369  | 2818422  | 203349   | 345970  | 408317  | 330478   | 365585   | 5717463  | 1145128 | 895127   | 614021  | 992223    | 2696777 | 672411   | 854037   | 351055   | 835096  |
| EIC | Negative | 295.2279 | 4.60 | EIC_22                | 1814263  | 1242153 | 2793288  | 2098844  | 1476053  | 1505184 | 2403587 | 1803080  | 1783972  | 1459831  | 1056914 | 1237674  | 1127736 | 1850811   | 842572  | 3085360  | 2050788  | 2107796  | 1259174 |
| EIC | Negative | 351.2180 | 2.69 | EIC_232;EIC_237;EIC_2 | 1269165  | 592287  | 1742809  | 707783   | 323741   | 357170  | 542365  | 447053   | 342040   | 826993   | 541355  | 706468   | 719023  | 567057    | 647001  | 539880   | 521454   | 903129   | 692049  |
| EIC | Negative | 351.2180 | 1.99 | EIC_233;EIC_249       | 1240954  | 2002709 | 883624   | 450273   | 577744   | 823106  | 956532  | 0        | 826293   | 960124   | 1907250 | 1767383  | 1199103 | 1336586   | 1247557 | 2136947  | 2166815  | 0        | 1667854 |
| EIC | Negative | 295.2279 | 4.87 | EIC_24                | 1758142  | 1223342 | 2681576  | 2048385  | 1850019  | 1634064 | 1810269 | 2745009  | 2479887  | 1434098  | 1183958 | 1268345  | 1477835 | 2777201   | 775516  | 1427006  | 1695083  | 2398377  | 1532683 |
| EIC | Negative | 295.2279 | 4.23 | EIC_25                | 1149653  | 773847  | 1771176  | 2506718  | 1065347  | 941476  | 1106316 | 1623156  | 1364437  | 1236935  | 759763  | 1075993  | 949548  | 1072596   | 575745  | 1821045  | 1032673  | 1841128  | 756012  |
| EIC | Negative | 353.2343 | 3.25 | EIC_251;EIC_256;EIC_2 | 82265    | 50695   | 122171   | 55776    | 75020    | 118529  | 55370   | 66294    | 101434   | 54678    | 40748   | 42777    | 46989   | 39443     | 35463   | 3035833  | 55351    | 95609    | 50039   |
| EIC | Negative | 353.2322 | 3.31 | EIC_251;EIC_265       | 184205   | 159102  | 180669   | 190372   | 186965   | 178831  | 176301  | 619625   | 167680   | 166780   | 10478   | 155937   | 164252  | 153508    | 150369  | 3083900  | 182311   | 163674   | 154416  |
| EIC | Negative | 353.2055 | 4.76 | EIC_277               | 24162    | 0       | 358595   | 0        | 0        | 181549  | 0       | 0        | 0        | 0        | 77689   | 208603   | 0       | 328747    | 101199  | 35556    | 0        | 622842   | 0       |
| EIC | Negative | 295.2279 | 3.92 | EIC_29                | 4355107  | 2833948 | 7837475  | 32728570 | 5934848  | 4237401 | 5177897 | 13505552 | 10547096 | 9029549  | 4894902 | 10786102 | 8421024 | 2089140   | 2453830 | 12700316 | 6715084  | 14602457 | 3229498 |
| EIC | Negative | 297.2436 | 4.72 | EIC_31                | 6765881  | 5291685 | 14916543 | 18029994 | 11225066 | 8268788 | 9321963 | 16933909 | 13253614 | 9886977  | 5680328 | 8179057  | 8162908 | 8436309   | 3488445 | 10952324 | 8526313  | 13389325 | 5843028 |
| EIC | Negative | 363.2530 | 3.78 | EIC_312               | 188964   | 72611   | 152430   | 59842    | 133174   | 54967   | 33222   | 11516    | 46190    | 58773    | 41548   | 174571   | 0       | 38304     | 46964   | 481940   | 40551    | 71855    | 69873   |
| EIC | Negative | 363.2553 | 3.79 | EIC_312               | 208443   | 138793  | 196069   | 564609   | 185477   | 163088  | 144547  | 227530   | 214969   | 310168   | 152295  | 182090   | 212987  | 112316    | 92886   | 206691   | 186210   | 296295   | 85317   |
| EIC | Negative | 365.1975 | 2.01 | EIC_315               | 0        | 82273   | 0        | 0        | 0        | 0       | 0       | 0        | 0        | 0        | 81057   | 108200   | 71661   | 52858     | 101426  | 105545   | 36372    | 0        | 105486  |
| EIC | Negative | 299.1878 | 2.57 | EIC_32                | 883040   | 77085   | 604590   | 1048908  | 73587    | 98743   | 106217  | 663709   | 53721    | 724641   | 85247   | 88049    | 80991   | 56535     | 100727  | 78715    | 73440    | 737070   | 71629   |
| EIC | Negative | 299.1880 | 2.49 | EIC_32                | 79673    | 499498  | 43582    | 89403    | 547183   | 651773  | 591208  | 60944    | 517940   | 73529    | 668815  | 884291   | 687057  | 330754    | 611587  | 714156   | 646607   | 78154    | 40780   |
| EIC | Negative | 375.2173 | 2.91 | EIC_328;EIC_332;EIC_3 | 7457627  | 4877275 | 9229228  | 6705362  | 2905285  | 2570058 | 4312582 | 2578429  | 3050684  | 7207804  | 4968992 | 5839924  | 5067730 | 5126322   | 4100040 | 5829202  | 5441222  | 4707553  | 3238359 |
| EIC | Negative | 299.2591 | 5.44 | EIC_33                | 1842977  | 1539795 | 1350476  | 1451152  | 2487107  | 2496631 | 1916251 | 1877615  | 1710715  | 1233811  | 1181899 | 1069900  | 1407122 | 1462059   | 1577666 | 1929276  | 13670027 | 1826091  | 197439  |
| EIC | Negative | 299.2591 | 5.50 | EIC_33                | 1497490  | 1181801 | 3633108  | 3046581  | 2311495  | 1759553 | 2158629 | 4027523  | 2801719  | 2048264  | 1288801 | 1297498  | 1667995 | 1678430   | 822133  | 1423725  | 1187704  | 2543997  | 1396947 |
| EIC | Negative | 299.2592 | 5.37 | EIC_33                | 5103601  | 3825379 | 10326756 | 13335019 | 5078186  | 3473148 | 5002087 | 10435433 | 6876145  | 5357375  | 3041570 | 3386209  | 3931515 | 6054609   | 2994770 | 2893625  | 4506673  | 9156559  | 4742954 |
| EIC | Negative | 299.2591 | 5.36 | EIC_33                | 1986408  | 1754053 | 10927021 | 14024105 | 2348181  | 1989892 | 5002087 | 10740308 | 7390547  | 5357375  | 3041570 | 1579739  | 3931515 | 2465127   | 2994770 | 2893625  | 1994961  | 9534463  | 4742954 |
| EIC | Negative | 375.2172 | 3.76 | EIC_340               | 451381   | 292059  | 621130   | 337972   | 203589   | 212671  | 332867  | 296710   | 227275   | 275984   | 196848  | 310042   | 297781  | 303902    | 210327  | 321854   | 298258   | 423708   | 1860000 |
| EIC | Negative | 377.2333 | 2.64 | EIC_346               | 0        | 77908   | 0        | 0        | 102364   | 89578   | 137957  | 0        | 99497    | 0        | 60080   | 68314    | 61960   | 47794     | 70038   | 89804    | 72938    | 76446    | 75423   |
| EIC | Negative | 391.2135 | 2.15 | EIC_352               | 1353176  | 376558  | 1429942  | 594509   | 318174   | 722010  | 105904  | 131491   | 911314   | 406329   | 590108  | 379105   | 599793  | 505039    | 608404  | 310377   | 723011   | 121660   | 324769  |
| EIC | Negative | 391.2136 | 2.48 | EIC_356               | 331987   | 891958  | 0        | 1141773  | 875013   | 910392  | 1081200 | 0        | 915759   | 623557   | 891712  | 915469   | 983075  | 998739    | 964810  | 889005   | 1023292  | 377117   | 1073529 |
| EIC | Negative | 289.1810 | 3.77 | EIC_4                 | 284245   | 194640  | 393113   | 238032   | 216737   | 193256  | 296053  | 306614   | 64155    | 365190   | 289301  | 280445   | 184479  | 168938    | 195875  | 79683    | 149056   | 263116   | 120349  |
| EIC | Negative | 307.1936 | 2.26 | EIC_41;EIC_42         | 0        | 210838  | 44762    | 0        | 109843   | 0       | 155992  | 205643   | 97801    | 309343   | 0       | 200301   | 177395  | 31486     | 19914   | 167443   | 38214    | 263113   | 30758   |
| EIC | Negative | 309.2074 | 3.68 | EIC_51;EIC_58         | 922156   | 938972  | 922363   | 1593730  | 1292200  | 834852  | 1491311 | 1394720  | 1706642  | 968164   | 680727  | 996371   | 878243  | 797690    | 726278  | 1008581  | 1074276  | 1178738  | 1000156 |
| EIC | Negative | 309.2073 | 3.61 | EIC_51;EIC_59         | 964863   | 876440  | 1056768  | 1578506  | 1209746  | 1385745 | 1391639 | 1543824  | 856580   | 1209287  | 992977  | 794792   | 728626  | 979187    | 711329  | 754442   | 1052981  | 1009288  | 96794   |
| EIC | Negative | 309.2072 | 3.37 | EIC_55                | 303533   | 245577  | 295801   | 481708   | 351291   | 282196  | 366121  | 442105   | 523621   | 239205   | 207988  | 334926   | 245905  | 222028    | 212668  | 333580   | 288451   | 324968   | 259191  |
| EIC | Negative | 309.2074 | 3.80 | EIC_58                | 12694305 | 3365429 | 16848273 | 11980314 | 3717569  | 3801183 | 3710269 | 10912164 | 3076735  | 19543624 | 3408964 | 4346705  | 3433061 | 8241886   | 6748073 | 2706653  | 4662310  | 14392047 | 5825451 |
| EIC | Negative | 291.1967 | 3.99 | EIC_6                 | 102125   | 68735   | 101414   | 97142    | 94993    | 68820   | 103292  | 96269    | 156016   | 82525    | 68071   | 71347    | 78055   | 72935     | 56800   | 102475   | 95362    | 120955   | 82195   |
| EIC | Negative | 311.2230 | 3.23 | EIC_61;EIC_64;EIC_66  | 1133502  | 996137  | 1372220  | 1572841  | 1426964  | 962420  | 1830818 | 1367103  | 1038948  | 835820   | 1169337 | 1032442  | 917867  | 842874    | 1355161 | 1210315  | 1265325  | 1210227  | 1210227 |
| EIC | Negative | 311.2229 | 3.30 | EIC_61;EIC_64;EIC_67  | 1972991  | 1540887 | 2116138  | 2288030  | 2286455  | 1828469 | 2704432 | 1941396  | 5304684  | 1498612  | 1273156 | 1950604  | 1736700 | 1621262   | 1229432 | 6502351  | 2122896  | 2394020  | 2085420 |
| EIC | Negative | 311.2229 | 2.92 | EIC_62                | 1434912  | 512646  | 1621077  | 2267828  | 669030   | 680872  | 1050939 | 1176049  | 818334   | 1606756  | 446462  | 656091   | 882620  | 670382    | 277282  | 743279   | 907958   | 1564755  | 474824  |
| EIC | Negative | 311.2229 | 3.08 | EIC_62;EIC_66         | 734475   | 508125  | 739498   | 752113   | 691001   | 607976  | 923544  | 718108   | 979489   | 561308   | 428711  | 646795   | 525544  | 454392    | 390387  | 1338620  | 617975   | 654694   | 561849  |
| EIC | Negative | 311.2229 | 4.35 | EIC_63;EIC_68         | 14278944 | 4139812 | 17807795 | 18188107 | 6042277  | 4593753 | 6260993 | 15952954 | 5280500  | 23451307 | 4671745 | 5877099  | 5814179 | 8153851   | 7981772 | 4160074  | 6495203  | 24077019 | 6091536 |
| EIC | Negative | 313.2388 | 3.32 | EIC_71;EIC_73;EIC_74  | 3766900  | 2024915 | 7914021  | 31227329 | 4761730  | 3620259 | 5564348 | 11363710 | 8363841  | 8597089  | 3986055 | 8600092  | 7539058 | 2068100   | 899658  | 7399676  | 5778599  | 12024925 | 1746547 |
| EIC | Negative | 313.2385 | 3.14 | EIC_74                | 878304   | 318929  | 846428   | 724049   | 349046   | 463988  | 526279  | 463988   | 552003   | 559371   | 336979  | 497316   | 494960  |           |         |          |          |          |         |

|         |          |          |      |                       |           |           |           |           |           |           |           |           |           |           |           |           |           |           |           |           |           |           |           |
|---------|----------|----------|------|-----------------------|-----------|-----------|-----------|-----------|-----------|-----------|-----------|-----------|-----------|-----------|-----------|-----------|-----------|-----------|-----------|-----------|-----------|-----------|-----------|
| EIC     | Negative | 535.4738 | 6.53 | FAHFA_535.472635      | 828676    | 964767    | 1561079   | 1908255   | 1336773   | 975744    | 1521206   | 1640030   | 2110758   | 1152335   | 1708533   | 1262644   | 2028019   | 1739100   | 1125314   | 1904472   | 1802115   | 1475008   | 1231771   |
| EIC     | Negative | 551.5055 | 6.58 | FAHFA_551.503935      | 348927    | 524916    | 539367    | 708087    | 653040    | 514298    | 758482    | 651422    | 1223786   | 485612    | 515838    | 433020    | 728929    | 640579    | 562100    | 804136    | 826015    | 593567    | 598012    |
| EIC     | Negative | 555.4425 | 6.70 | FAHFA_555.441335      | 459393    | 422278    | 359720    | 444545    | 633171    | 434503    | 598725    | 509544    | 326679    | 530863    | 538837    | 482345    | 414509    | 505207    | 617052    | 398058    | 285350    | 395287    | 514046    |
| EIC     | Negative | 555.4419 | 6.29 | FAHFA_555.441335      | 9570693   | 14766058  | 24793610  | 39684589  | 26034000  | 12257067  | 19370727  | 24767516  | 29814918  | 13357126  | 9023753   | 11752323  | 21188987  | 89927669  | 5180990   | 12589050  | 17023208  | 18779303  | 9731877   |
| EIC     | Negative | 555.4425 | 6.63 | FAHFA_555.441335      | 879748    | 498814    | 579175    | 737430    | 934985    | 675398    | 1186601   | 1025358   | 561384    | 830534    | 723595    | 778572    | 564951    | 575882    | 1077681   | 1113880   | 772826    | 692438    | 1057696   |
| EIC     | Negative | 559.4750 | 6.67 | FAHFA_559.4756985     | 5172547   | 4565304   | 4977899   | 5432464   | 6700649   | 6638626   | 7174838   | 8654638   | 5298701   | 6521293   | 5203234   | 4966325   | 4906250   | 4825792   | 6014084   | 6348631   | 4942807   | 5661293   | 8667804   |
| EIC     | Negative | 559.4731 | 6.70 | FAHFA_559.472635      | 3216574   | 2574719   | 2834299   | 3247388   | 4670858   | 2985951   | 4401367   | 3996244   | 3130072   | 2552178   | 3739868   | 3206551   | 2556596   | 3552833   | 4213877   | 2901938   | 1996239   | 3024509   | 3373329   |
| EIC     | Negative | 559.4716 | 6.47 | FAHFA_559.472635      | 41032510  | 50348298  | 49668699  | 61463355  | 52734342  | 40329612  | 50976624  | 50027661  | 70087557  | 56875709  | 43680081  | 49238649  | 50771921  | 42528403  | 43455701  | 52571024  | 52975365  | 65580414  | 45727432  |
| EIC     | Negative | 563.5049 | 6.65 | FAHFA_563.503935      | 431548    | 784583    | 1301943   | 1509593   | 1053029   | 1159390   | 1154639   | 1293432   | 1750446   | 3737555   | 597523    | 833328    | 4121735   | 780299    | 512477    | 1026099   | 886230    | 905020    | 583137    |
| EIC     | Negative | 563.5048 | 6.55 | FAHFA_563.503935      | 7407676   | 6651239   | 9529378   | 10826528  | 10132700  | 6314883   | 11101477  | 9853144   | 12991891  | 8238243   | 20056592  | 13422782  | 25674191  | 12498565  | 12365450  | 12413109  | 15129949  | 22940103  | 10340876  |
| EIC     | Negative | 581.4579 | 6.41 | FAHFA_581.456985      | 1484208   | 2619907   | 4246049   | 6677966   | 4119208   | 2411683   | 5194352   | 4796085   | 6315357   | 2105610   | 1976146   | 4191010   | 3507951   | 1459217   | 1052427   | 3176067   | 3117396   | 3682277   | 1374520   |
| EIC     | Negative | 583.4726 | 6.46 | FAHFA_583.472635      | 2463625   | 3803153   | 2281561   | 5603873   | 4358645   | 3333092   | 4613225   | 3762936   | 5208319   | 3335669   | 3504930   | 4127379   | 4177896   | 3191943   | 3274958   | 4480807   | 4342154   | 3707727   | 3590445   |
| EIC     | Negative | 587.5083 | 6.84 | FAHFA_587.503935      | 95017     | 94614     | 59194     | 74095     | 84711     | 62697     | 51805     | 44766     | 354664    | 35813     | 68807     | 73281     | 87691     | 62514     | 79633     | 84335     | 238089    | 80406     | 66056     |
| EIC     | Negative | 589.5218 | 6.57 | FAHFA_589.519585      | 1521514   | 2151945   | 2052888   | 3926272   | 2398655   | 2952980   | 2966923   | 3987116   | 3536102   | 1689063   | 4104044   | 3005855   | 2829055   | 1848439   | 2325312   | 3955778   | 2614369   | 4678196   | 2295317   |
| EIC     | Negative | 593.5530 | 6.71 | FAHFA_593.550885      | 191490    | 386715    | 343781    | 516015    | 425962    | 299724    | 486250    | 416041    | 385223    | 91478     | 308920    | 364027    | 304265    | 280377    | 205951    | 334626    | 290869    | 326187    | 203447    |
| EIC     | Negative | 603.4430 | 6.37 | FAHFA_603.441335      | 298415    | 41626     | 407401    | 125925    | 49428     | 0         | 136693    | 65580     | 221597    | 124101    | 59088     | 75083     | 52244     | 0         | 123910    | 162596    | 135959    | 119929    |           |
| EIC     | Negative | 607.4730 | 6.64 | FAHFA_607.472635      | 30935076  | 33399766  | 1476807   | 39029194  | 32408575  | 23624528  | 36103507  | 29308851  | 33218461  | 16356160  | 27480407  | 29955877  | 35515719  | 20215258  | 19746415  | 32567700  | 31083886  | 24077173  | 28365746  |
| EIC     | Negative | 619.5682 | 6.44 | FAHFA_619.566535      | 749063    | 805070    | 1083774   | 1471349   | 1410092   | 1083774   | 1100432   | 1320474   | 1193292   | 1135888   | 2646068   | 1276311   | 964885    | 1072160   | 1629012   | 1724097   | 1108266   | 22077136  | 681024    |
| EIC     | Negative | 631.4727 | 6.44 | FAHFA_631.472635      | 2842897   | 5503640   | 2319215   | 8121231   | 4453821   | 2613036   | 3436910   | 4566163   | 6538985   | 2317104   | 2809748   | 2468181   | 5091809   | 1574338   | 1705640   | 4903486   | 3066673   | 2855624   | 2463544   |
| EIC     | Negative | 277.2174 | 6.29 | GAMMA-LINOLENATE [M-] | 259445398 | 334155311 | 491897270 | 678757171 | 48646456  | 29268918  | 386815542 | 479804996 | 563340058 | 312079828 | 239928283 | 281701676 | 428415830 | 232686808 | 167898290 | 306540235 | 377969995 | 406482534 | 245664416 |
| EIC     | Negative | 337.2327 | 6.29 | GAMMA-LINOLENATE [M-] | 0         | 547758    | 0         | 0         | 0         | 58734     | 0         | 881101    | 961291    | 0         | 434250    | 0         | 592705    | 441030    | 0         | 522010    | 765232    | 0         | 0         |
| fpHILIC | Negative | 195.0510 | 3.11 | GLUCONATE             | 21164068  | 17612336  | 12994808  | 16134800  | 25703544  | 34287940  | 28567742  | 14126324  | 29128876  | 15589673  | 21883266  | 25153206  | 19660160  | 20165750  | 22397164  | 24640004  | 23256956  | 12348842  | 17327818  |
| fpHILIC | Negative | 259.0231 | 4.35 | GLUCOSE 6-PHOSPHATE   | 504939    | 224863    | 108276    | 236685    | 235381    | 481234    | 174557    | 154529    | 304693    | 177435    | 143146    | 284670    | 206700    | 241928    | 181199    | 512457    | 365611    | 283296    | 322143    |
| fpHILIC | Negative | 193.0351 | 3.92 | GLUCURONATE           | 2035132   | 1500301   | 1334746   | 1690109   | 1684470   | 2293761   | 1287790   | 1174372   | 1678493   | 1597437   | 1058221   | 1594653   | 1191904   | 1270611   | 1491711   | 1929126   | 1475601   | 1855687   | 1786952   |
| fpHILIC | Negative | 229.0117 | 3.90 | GLUCURONATE [M-CI]    | 3052424   | 1411931   | 1890019   | 1716775   | 1975485   | 2467613   | 1964698   | 1231983   | 1604188   | 896641    | 887682    | 1002781   | 2278989   | 1910830   | 395260    | 846986    | 3774681   | 1083310   | 708185    |
| fpHILIC | Positive | 130.0498 | 3.47 | GLUTAMINE[M-H2O+H]    | 135620608 | 99550528  | 117003168 | 117488536 | 98255928  | 103656328 | 96699312  | 98774168  | 16264952  | 106611888 | 106944576 | 9376324   | 93868256  | 84208352  | 113740040 | 90700560  | 99826344  | 107863928 | 92925176  |
| fpHILIC | Negative | 145.0619 | 3.47 | GLUTAMINE             | 175012512 | 115482760 | 145489840 | 126490824 | 106152768 | 113358816 | 110111424 | 109731248 | 100659616 | 124580016 | 110586216 | 111500136 | 110135104 | 87360104  | 140132304 | 104944240 | 107288560 | 137916528 | 79366040  |
| fpHILIC | Positive | 147.0763 | 3.47 | GLUTAMINE             | 524928832 | 393783168 | 470730008 | 465122080 | 395777184 | 410887680 | 394788320 | 382990272 | 429661632 | 419904472 | 424219168 | 392478816 | 386596320 | 348605344 | 447007688 | 367112576 | 447433376 | 434528896 | 373632832 |
| fpHILIC | Negative | 127.0513 | 3.47 | GLUTAMINE [M-H2O+H]   | 5399490   | 3609923   | 4122449   | 4140890   | 3356536   | 3525554   | 3405654   | 3579921   | 3049477   | 3871420   | 3565726   | 3483246   | 3405531   | 2703501   | 4443388   | 3219687   | 3619082   | 4027338   | 2407960   |
| fpHILIC | Negative | 167.0442 | 3.47 | GLUTAMINE [M+Na-2H]   | 1438585   | 1256255   | 1405155   | 1286944   | 1179280   | 1199714   | 1309834   | 1188582   | 1168504   | 1347333   | 1167121   | 1210429   | 1191924   | 1034656   | 1532426   | 1232476   | 1233553   | 1355284   | 921714    |
| fpHILIC | Positive | 169.0581 | 3.45 | GLUTAMINE[M+Na]       | 10063963  | 10013392  | 12825250  | 12456639  | 11412187  | 11650433  | 11092460  | 12818326  | 10502452  | 11655612  | 12209981  | 11606783  | 11109990  | 10248242  | 11837445  | 11476983  | 10992460  | 12293636  | 7957108   |
| EIC     | Negative | 448.3079 | 2.97 | Glycochenodeoxycholi  | 1052932   | 103950    | 103205    | 472139    | 23652     | 0         | 84146     | 611602    | 33783     | 6079248   | 108149    | 64892     | 401875    | 0         | 0         | 0         | 0         | 66065     | 14262     |
| EIC     | Negative | 464.3024 | 2.13 | GLYCCHOLATE [M-H]     | 13292092  | 805388    | 52118404  | 18816324  | 1193151   | 1020663   | 1055534   | 37266458  | 2197983   | 6079248   | 108149    | 64892     | 401875    | 773353    | 200504    | 62248     | 388789    | 11709119  | 336516    |
| EIC     | Negative | 448.3081 | 2.09 | Glycosodeoxycholic    | 859183    | 79394     | 1975707   | 871635    | 987805    | 83078     | 118191    | 1897538   | 124144    | 0         | 0         | 0         | 0         | 0         | 0         | 0         | 0         | 0         | 0         |
| EIC     | Negative | 309.2799 | 6.64 | Gondolic Acid [M-H]   | 13345937  | 23594155  | 25508340  | 36772030  | 349789594 | 26221225  | 30794298  | 30884730  | 34412069  | 26623116  | 27129561  | 52549012  | 36397494  | 29732540  | 27473345  | 50993991  | 36492277  | 42637035  | 27101759  |
| EIC     | Negative | 369.3010 | 6.64 | Gondolic Acid [M-H+Ac | 377966    | 504170    | 350250    | 685591    | 492408    | 624594    | 595280    | 761126    | 640961    | 526063    | 407551    | 532420    | 443310    | 539629    | 468592    | 725358    | 568109    | 528691    | 708990    |
| fpHILIC | Positive | 118.0612 | 3.65 | GUANIDINOACETATE      | 19563672  | 8084588   | 15277096  | 29573390  | 7837655   | 14806788  | 9242879   | 2161600   | 18005528  | 8971783   | 9524854   | 8751040   | 6561233   | 9395342   | 9028141   | 10539670  | 25728484  | 9076654   | 666666    |
| EIC     | Negative | 267.2332 | 6.50 | HEPTADECANOIC ACID    | 5612460   | 6618146   | 9586990   | 11463829  | 8495894   | 7597134   | 10206950  | 13275517  | 13147013  | 7993157   | 9203369   | 10734016  | 12312832  | 10532607  | 8985185   | 12926012  | 12443561  | 13040542  | 8591502   |
| EIC     | Negative | 269.2488 | 6.58 | HEPTADECANOATE [M-]   | 5976396   | 5951186   | 5753221   | 8181426   | 8428891   | 6793088   | 8656190   | 8844424   | 13030570  | 8903976   | 8937029   | 8053889   | 110108695 | 11299862  | 7758679   | 12025890  | 12237307  | 19824412  | 11631162  |
| fpHILIC | Positive | 156.0766 | 3.32 | HISTIDINE             | 167834416 | 82345752  | 167047376 | 113778480 | 58880908  | 74912208  | 67887792  | 97924728  | 59043308  | 141947648 | 84814224  | 95998940  | 76073120  | 91765128  | 119627408 | 75880568  | 71227472  | 143647840 | 92484800  |
| fpHILIC | Positive | 178.0533 | 3.41 | HISTIDINE[M+Na]       | 2211689   | 2052228   | 3990285   | 2623440   | 2050784   | 1840138   | 1695165   | 2086813   | 3588623   | 2281382   | 2269062   | 1832663   | 3012580   | 21067375  | 1619538   | 1866584   | 2029244   | 3066691   | 2714810   |
| EIC     | Negative | 267.0462 | 0.57 | HOMOCYSTEINE [M-H]    | 49561     | 48608     | 139705    | 368897    | 99190     | 64124     | 109830    | 128000    | 677510    | 251785    | 90062     | 103822    | 231868    | 16147     | 54498     | 245947    | 87308     | 164586    | 48122     |
| EIC     | Negative | 335.2231 | 3.94 | HXK3 [M-H]            | 367595    | 282910    | 206013    | 713880    | 244162    | 302185    | 245909    | 420049    | 1417039   | 188934    | 199163    | 390488    | 848331    | 674479    | 241887    | 559702    | 1473750   | 948048    | 639912    |
| fpHILIC | Negative | 108.0125 | 3.39 | HYPOTAURINE           | 2147646   | 744667    | 1075875   | 1603066   | 694960    | 2030282   | 447721    | 1473318   | 299650    | 1247462   | 303925    | 796184    | 324125    | 388616    | 224971    | 1081192   | 175012    | 1356274   | 1029079   |
| fpHILIC | Positive | 110.0273 | 3.38 |                       |           |           |           |           |           |           |           |           |           |           |           |           |           |           |           |           |           |           |           |

|        |          |          |      |                           |           |           |           |            |           |           |           |           |           |           |           |           |            |            |           |           |           |           |           |
|--------|----------|----------|------|---------------------------|-----------|-----------|-----------|------------|-----------|-----------|-----------|-----------|-----------|-----------|-----------|-----------|------------|------------|-----------|-----------|-----------|-----------|-----------|
| EIC    | Negative | 269.2125 | 4.75 | Novel EIC_1               | 1291290   | 1234596   | 2067090   | 1857813    | 1985678   | 1589034   | 1848629   | 2322468   | 2345999   | 1366703   | 1129953   | 1314313   | 1333454    | 1374252    | 1084035   | 1828301   | 1297793   | 1645224   | 1353187   |
| EIC    | Negative | 345.2438 | 4.94 | Novel EIC_13;Novel EIC    | 371544    | 197414    | 176989    | 704750     | 178427    | 240874    | 186492    | 275767    | 906272    | 209630    | 145543    | 311177    | 620743     | 322658     | 230608    | 379604    | 813626    | 611084    | 257145    |
| EIC    | Negative | 345.2435 | 5.29 | Novel EIC_14;Novel EIC    | 548980    | 113311    | 127789    | 955570     | 117573    | 127000    | 181522    | 277789    | 479592    | 121618    | 106081    | 342845    | 413020     | 171075     | 240350    | 276246    | 572502    | 686051    | 230942    |
| EIC    | Negative | 347.2595 | 5.22 | Novel EIC_23              | 232017    | 62335     | 149776    | 184975     | 77674     | 93585     | 82179     | 141122    | 125091    | 196414    | 79551     | 148194    | 109084     | 39709      | 84805     | 187400    | 174882    | 159312    | 109184    |
| EIC    | Negative | 347.2594 | 5.60 | Novel EIC_24;Novel EIC    | 460451    | 202150    | 172781    | 1097916    | 254289    | 323128    | 240676    | 437815    | 943785    | 186183    | 178330    | 586068    | 816027     | 460585     | 327151    | 451750    | 1235621   | 1166548   | 374008    |
| EIC    | Negative | 365.2694 | 5.67 | Novel EIC_33              | 404818    | 214271    | 420429    | 367242     | 246161    | 186780    | 263095    | 321122    | 233187    | 345389    | 189944    | 181237    | 188451     | 157162     | 239517    | 234308    | 176039    | 305574    | 180932    |
| EIC    | Negative | 295.1541 | 5.18 | Novel EIC_4               | 213562    | 168075    | 0         | 357414     | 267998    | 0         | 288191    | 280447    | 0         | 0         | 202867    | 0         | 212066     | 259846     | 0         | 0         | 187376    | 187115    | 0         |
| EIC    | Negative | 295.1588 | 5.18 | Novel EIC_4               | 224982    | 185609    | 295589    | 442528     | 284477    | 234441    | 321056    | 315431    | 338980    | 212707    | 204841    | 224929    | 313688     | 155859     | 147271    | 184679    | 229434    | 315427    | 172292    |
| EIC    | Negative | 309.1710 | 2.73 | Novel EIC_6               | 2801515   | 3941745   | 1932157   | 2478474    | 3291824   | 3155036   | 3580132   | 2759325   | 3185264   | 3308664   | 3851194   | 3413713   | 4055231    | 3443620    | 4128913   | 2871559   | 3869595   | 3956003   | 4165219   |
| EIC    | Negative | 325.2371 | 4.92 | Novel EIC_9               | 278205    | 127213    | 371415    | 374752     | 190353    | 144152    | 166749    | 351869    | 126609    | 301364    | 148418    | 179422    | 177794     | 166996     | 142326    | 178112    | 211806    | 498298    | 123790    |
| fpHLIC | Positive | 204.1226 | 2.32 | O-ACETYL CARNITINE        | 252386896 | 289114848 | 337102784 | 504985258  | 291623424 | 369159808 | 385057824 | 324496576 | 625402816 | 304302816 | 401348608 | 391777440 | 434942464  | 168504864  | 198548672 | 523925248 | 267362464 | 338750656 | 230938064 |
| fpHLIC | Positive | 202.1086 | 2.31 | O-ACETYL CARNITINE        | 296554    | 323650    | 353225    | 509159     | 296454    | 349652    | 393416    | 367303    | 595019    | 331915    | 418960    | 413682    | 472251     | 198048     | 232442    | 499507    | 271154    | 363682    | 220963    |
| EIC    | Negative | 384.3127 | 6.36 | Oleoyl Ethanolamide [M-H] | 3255840   | 2913322   | 2436172   | 3994120    | 3300164   | 3542223   | 3513855   | 3344328   | 2379535   | 1995769   | 2316541   | 2505368   | 2372227    | 1492576    | 2023407   | 2258012   | 2047602   | 2328169   | 1612335   |
| EIC    | Negative | 355.2853 | 6.39 | OLEOYL-GLYCEROL [M-H]     | 937275    | 683770    | 1220901   | 986196     | 335144    | 306059    | 153402    | 141159    | 0         | 484771    | 80254     | 403895    | 459765     | 200380     | 200679    | 425228    | 392000    | 710840    | 209625    |
| EIC    | Negative | 415.3060 | 6.44 | OLEOYL-GLYCEROL [M-H]     | 45278836  | 27232203  | 8769027   | 21627335   | 17309883  | 26429824  | 28771337  | 25698067  | 13492916  | 21996242  | 29327089  | 15208911  | 19861602   | 29931830   | 30916522  | 10037265  | 26329033  | 14399644  | 17030251  |
| fpHLIC | Negative | 145.0141 | 3.88 | OXOGLUTARATE              | 1598343   | 1213601   | 1875250   | 2581616    | 944016    | 1407106   | 1347403   | 2246129   | 904006    | 2507589   | 1227150   | 171747    | 900463     | 1991018    | 2082764   | 754681    | 1224245   | 2067082   | 1229374   |
| fpHLIC | Positive | 176.0690 | 3.50 | P-OCTOPAMINE(M+Na)        | 2216851   | 1155050   | 2046980   | 3253482    | 36722249  | 3130153   | 2668658   | 3618098   | 1026305   | 3848465   | 3978365   | 4024449   | 3934593    | 0          | 2982839   | 3759838   | 3990629   | 3053717   | 684946    |
| fpHLIC | Negative | 341.1091 | 3.53 | PALATINOSE;SUCROSE        | 2391539   | 49419260  | 29723630  | 3460413    | 4510216   | 5428136   | 18158210  | 8550205   | 37537600  | 2343553   | 1545875   | 4043746   | 4998860    | 44063472   | 4079867   | 3333763   | 1159565   | 4607508   | 187939216 |
| fpHLIC | Negative | 377.0860 | 3.53 | PALATINOSE(M+Cl);SUC      | 145414    | 1790201   | 1233869   | 251128     | 341053    | 488085    | 999855    | 404065    | 1403898   | 156745    | 139472    | 347326    | 483139     | 1398442    | 332628    | 232346    | 738638    | 301909    | 4360407   |
| fpHLIC | Negative | 363.0904 | 3.55 | PALATINOSE(M+Na-2H)       | 75374     | 710722    | 619765    | 127855     | 154053    | 164232    | 466583    | 247988    | 150460    | 16745     | 127855    | 138063    | 161892     | 754228     | 134184    | 107009    | 314061    | 159604    | 0         |
| fpHLIC | Positive | 365.1048 | 3.53 | PALATINOSE(M+Na);SUC      | 2589430   | 14167190  | 12673654  | 3409331    | 3750562   | 4091804   | 102730506 | 6903117   | 13452089  | 2373143   | 1666290   | 3791091   | 3891149    | 0          | 3798218   | 3190543   | 7905948   | 4469640   | 9856480   |
| EIC    | Negative | 253.2170 | 6.42 | PALMITOLEIC ACID [M-H+H]  | 145406976 | 152334531 | 303893616 | 329755900  | 250528675 | 173611384 | 313063040 | 284474688 | 339027817 | 194282115 | 146740383 | 198662525 | 236811715  | 123373036  | 125394296 | 202712497 | 224613497 | 236853067 | 109395604 |
| EIC    | Negative | 313.2385 | 6.39 | PALMITOLEATE [M-H+H]      | 37307512  | 17588604  | 36869444  | 29376092   | 24460200  | 18469254  | 1711714   | 1965191   | 2021416   | 25644950  | 14404268  | 1254815   | 13456887   | 11830691   | 682320    | 13913844  | 15027454  | 19157098  | 13006392  |
| EIC    | Negative | 313.2386 | 6.52 | Palmitoleic Acid [M-H+H]  | 941549    | 1112505   | 1313023   | 1857017    | 1779123   | 1653452   | 1678865   | 2819674   | 2618616   | 1820108   | 1479744   | 1472840   | 1473803    | 1822854    | 1277631   | 1600214   | 1590344   | 2946277   | 1365255   |
| EIC    | Negative | 358.2962 | 6.24 | Palmitoyl Ethanolamid     | 2907898   | 2082838   | 2409014   | 3136362    | 2624664   | 3436454   | 2616987   | 2866191   | 15025490  | 2272712   | 2649762   | 2554176   | 2018348    | 1591867    | 1942082   | 2130220   | 2260016   | 2405308   | 1939961   |
| EIC    | Negative | 331.1919 | 2.41 | PGAS [M-H]                | 7488365   | 5176897   | 9741816   | 6505689    | 2240233   | 2369159   | 3909225   | 2254822   | 1185794   | 5537973   | 4383962   | 6842155   | 4117065    | 5000011    | 5852902   | 4561861   | 4838942   | 4537788   | 4082024   |
| EIC    | Negative | 391.2135 | 2.43 | PGAS [M-H+Acetate]        | 1910363   | 1233439   | 2036905   | 1685753    | 559219    | 689205    | 984069    | 681275    | 519111    | 1136659   | 963560    | 1722210   | 1569279    | 1168605    | 1454926   | 1072904   | 1170708   | 1481619   | 1175442   |
| EIC    | Negative | 353.2326 | 2.23 | PGDI [M-H]                | 220087    | 104675    | 184486    | 236104     | 105140    | 215575    | 130647    | 181303    | 156377    | 199443    | 91344     | 122200    | 161670     | 186972     | 115342    | 134228    | 272914    | 295222    | 98999     |
| EIC    | Negative | 351.2811 | 1.48 | PGDI [M-H+Acetate]        | 884669    | 1359779   | 946410    | 282933     | 534848    | 658474    | 1096461   | 0         | 712584    | 387119    | 1148232   | 1341157   | 1357411    | 1196976    | 1310044   | 1743687   | 1364113   | 271618    | 1089511   |
| EIC    | Negative | 411.2388 | 1.48 | PGD2 [M-H+Acetate]        | 1095958   | 2042671   | 789835    | 783201     | 711296    | 951546    | 1384320   | 0         | 855863    | 360457    | 1406978   | 1729666   | 1710621    | 1514575    | 1682807   | 223767    | 1716306   | 293958    | 1316432   |
| EIC    | Negative | 367.2128 | 2.37 | PGG2 [M-H]                | 251774    | 91300     | 269945    | 150401     | 63264     | 87475     | 111811    | 134678    | 75979     | 169727    | 90914     | 118224    | 135777     | 98422      | 90026     | 134959    | 118891    | 66318     | 106685    |
| fpHLIC | Negative | 164.0716 | 2.06 | PHENYLALANINE             | 85071552  | 47952824  | 61533752  | 36995976   | 34888080  | 51645988  | 39199472  | 32726562  | 40509432  | 51417020  | 41358944  | 47102824  | 39774052   | 57090140   | 65162700  | 44499320  | 35708948  | 52378744  | 46773232  |
| fpHLIC | Positive | 166.0859 | 2.06 | PHENYLALANINE             | 483868864 | 276771392 | 378964288 | 2463966176 | 225403120 | 283886752 | 243844768 | 237151472 | 260669648 | 317115232 | 267492752 | 285804192 | 233358352  | 374641152  | 409788192 | 290270880 | 211712800 | 341046816 | 270318464 |
| fpHLIC | Negative | 210.0284 | 3.97 | PHOSPHOCREATINE           | 1096835   | 290313    | 239993    | 427946     | 288192    | 576263    | 439691    | 350858    | 369557    | 310137    | 348611    | 495988    | 351163     | 402097     | 330438    | 635983    | 432423    | 590768    | 380772    |
| fpHLIC | Positive | 212.0427 | 3.97 | PHOSPHOCREATINE           | 2115027   | 803229    | 483350    | 994406     | 761085    | 1499832   | 1040752   | 759217    | 870967    | 646650    | 822870    | 1172110   | 832951     | 982397     | 774445    | 1490461   | 1028219   | 1364658   | 927255    |
| fpHLIC | Positive | 130.0863 | 2.71 | PIPECOLATE                | 12485032  | 14812108  | 9729421   | 16489753   | 14302058  | 18409794  | 13865738  | 7896523   | 12165471  | 8890542   | 14140082  | 12525613  | 15618387   | 7732377    | 12165973  | 17617362  | 13564453  | 9852160   | 9265333   |
| fpHLIC | Negative | 114.0560 | 2.79 | PROLINE                   | 16625191  | 16468868  | 12510500  | 6168700    | 7480513   | 11201414  | 6004681   | 6682575   | 9525250   | 9375107   | 16655019  | 6822012   | 16774652   | 27086158   | 8479343   | 8111995   | 1212195   | 13982244  | 9265333   |
| fpHLIC | Positive | 116.0707 | 2.79 | PROLINE                   | 873386112 | 791868224 | 752803968 | 549392568  | 609956184 | 775746624 | 528468352 | 575783680 | 538934800 | 637772864 | 673619456 | 559630236 | 8234745280 | 1015801984 | 607444232 | 588987762 | 725147488 | 769967488 | 9265333   |
| fpHLIC | Positive | 160.0341 | 2.79 | PROLINE(M+2Na-H)          | 1085123   | 1182008   | 1125899   | 956178     | 686697    | 805188    | 492526    | 63082     | 541400    | 861602    | 797780    | 898152    | 733006     | 1384994    | 1358610   | 856477    | 771182    | 1173358   | 1138538   |
| fpHLIC | Positive | 138.0521 | 2.79 | PROLINE(M+Na)             | 1722691   | 2145443   | 2101572   | 1371169    | 1518684   | 1711814   | 1017405   | 1338748   | 1175473   | 1844835   | 1890256   | 2100958   | 1334042    | 2822664    | 2436060   | 1420410   | 1579286   | 1913806   | 2109335   |
| fpHLIC | Positive | 151.0866 | 0.98 | PYRIDOXAMINE[M-H+2C]      | 632753    | 607725    | 276421    | 203146     | 899055    | 992000    | 567797    | 30164     | 0         | 46020     | 32503     | 0         | 0          | 43319      | 462082    | 0         | 46065     | 0         | 0         |
| fpHLIC | Negative | 104.0354 | 3.62 | SERINE                    | 37373420  | 21773034  | 26605544  | 23226048   | 13815662  | 14502344  | 12576777  | 16295856  | 13025245  | 23399998  | 18482700  | 21213318  | 20555774   | 18819268   | 30305386  | 23516894  | 17125850  | 30442232  | 15207836  |
| fpHLIC | Positive | 106.0501 | 3.61 | SERINE                    | 189593626 | 15950545  | 15708095  | 11685174   | 10542176  | 127937495 | 9379645   | 112737379 | 9379645   | 16083645  | 14856634  | 154531513 | 15046096   | 16322972   | 23937090  | 17707608  | 14837737  | 14561895  | 15038502  |
| fpHLIC | Positive | 88.0398  | 3.61 | SERINE(M+2Na-H)           | 524336    | 512821    | 495055    | 401543     | 266442    | 368662    | 351177    | 297888    | 349804    | 423298    | 396457    | 413337    | 407715     | 454470     | 682642    | 471354    | 347926    | 432837    | 424585    |
| fpHLIC | Positive | 150.0134 | 3.62 | SERINE(M+2Na-H)           | 481058    | 508272    | 612491    | 614079     | 599608    | 438510    | 464714    | 695908    | 416534    | 708712    | 681953    | 570692    | 624607     | 491290     | 642456    | 625602    | 5         |           |           |



|         |          |          |      |               |           |           |           |           |           |           |           |           |           |           |           |           |           |           |           |           |           |           |           |
|---------|----------|----------|------|---------------|-----------|-----------|-----------|-----------|-----------|-----------|-----------|-----------|-----------|-----------|-----------|-----------|-----------|-----------|-----------|-----------|-----------|-----------|-----------|
| fpHILIC | Positive | 118.0862 | 2.70 | VALINE        | 189461264 | 226060384 | 198742560 | 151577840 | 173969760 | 235383408 | 196479616 | 146329952 | 158744288 | 182998896 | 246969584 | 242085520 | 209265616 | 310406752 | 333916032 | 209335728 | 184898144 | 178683760 | 248191360 |
| fpHILIC | Negative | 152.0484 | 2.71 | VALINE (M+Cl) | 291197    | 411555    | 425810    | 318034    | 364498    | 436629    | 401274    | 370351    | 343034    | 403326    | 459022    | 432626    | 394596    | 545982    | 603897    | 313273    | 430525    | 306001    | 479412    |
| EIC     | Negative | 299.1348 | 1.14 | unknown       | 44817     | 24121     | 30517     | 20623     | 73496     | 45322     | 55743     | 53792     | 56405     | 53842     | 87820     | 32767     | 37656     | 68449     | 43605     | 43338     | 37573     | 37503     | 48431     |
| EIC     | Negative | 298.2834 | 6.67 | unknown       | 310342    | 411479    | 365462    | 689813    | 619642    | 643453    | 617651    | 710669    | 856333    | 685383    | 512170    | 702710    | 635797    | 581158    | 468894    | 627413    | 639032    | 697075    | 708500    |
| EIC     | Negative | 297.1847 | 1.03 | unknown       | 87124     | 56778     | 77038     | 56965     | 163798    | 128783    | 131215    | 117848    | 140897    | 112032    | 156592    | 85086     | 87795     | 139771    | 113751    | 107190    | 87570     | 101410    | 109547    |
| EIC     | Negative | 357.1557 | 0.90 | unknown       | 567901    | 389588    | 488026    | 377744    | 937670    | 851545    | 886401    | 739437    | 924738    | 589158    | 778447    | 613416    | 519264    | 845386    | 722030    | 171758    | 552978    | 602861    | 792702    |
| EIC     | Negative | 439.3378 | 6.79 | unknown       | 550877    | 963413    | 698823    | 885118    | 975374    | 1438666   | 1130949   | 1341690   | 1233746   | 816359    | 584061    | 659079    | 795904    | 612891    | 614414    | 749354    | 653043    | 105906    | 1149428   |
| EIC     | Negative | 434.3358 | 5.79 | unknown       | 445626    | 695775    | 708697    | 492492    | 1244558   | 1098772   | 1241566   | 1112405   | 1155192   | 438682    | 808239    | 513443    | 332272    | 986310    | 898089    | 835259    | 1090498   | 1521321   | 872584    |
| EIC     | Negative | 358.1596 | 0.90 | unknown       | 104960    | 73868     | 93951     | 75297     | 184849    | 135509    | 170960    | 133234    | 175611    | 113593    | 151734    | 112555    | 100384    | 163742    | 141380    | 135191    | 111527    | 123733    | 149121    |
| EIC     | Negative | 433.3328 | 5.79 | unknown       | 1583630   | 2326125   | 2336340   | 1781906   | 4214336   | 3577431   | 4115998   | 3929269   | 3979814   | 1456982   | 2691434   | 1802762   | 1206482   | 3491957   | 2998686   | 2943842   | 3550478   | 4960632   | 2894699   |
| EIC     | Negative | 253.1235 | 3.23 | unknown       | 242207    | 276492    | 241764    | 314555    | 330613    | 358311    | 371491    | 408318    | 381550    | 394232    | 229109    | 259075    | 266084    | 264442    | 289546    | 297060    | 293337    | 335669    | 343861    |
| EIC     | Negative | 449.1739 | 3.46 | unknown       | 269602    | 112711    | 130500    | 109947    | 386293    | 282496    | 308589    | 243479    | 264330    | 213506    | 286817    | 201133    | 162221    | 344813    | 242804    | 238747    | 160800    | 249357    | 339472    |
| EIC     | Negative | 450.1772 | 3.29 | unknown       | 167144    | 93168     | 95123     | 76036     | 307049    | 214250    | 236930    | 187912    | 215815    | 133581    | 187466    | 139167    | 118741    | 244907    | 174667    | 188585    | 128997    | 196649    | 253251    |
| EIC     | Negative | 297.1349 | 0.92 | unknown       | 348958    | 235376    | 290142    | 212882    | 829628    | 678397    | 681519    | 449399    | 736623    | 499535    | 814729    | 364594    | 415116    | 711425    | 438497    | 509354    | 403444    | 504860    | 625722    |
| EIC     | Negative | 440.3828 | 6.79 | unknown       | 218040    | 291600    | 216367    | 267094    | 292259    | 422296    | 347018    | 411531    | 407552    | 264878    | 187150    | 198071    | 266865    | 245503    | 322983    | 225615    | 208647    | 352255    | 355173    |
| EIC     | Negative | 425.2560 | 1.21 | unknown       | 50388     | 93664     | 52623     | 74391     | 177441    | 275554    | 164419    | 215629    | 241329    | 49650     | 57165     | 62713     | 56595     | 61136     | 137012    | 90857     | 142916    | 144529    | 130288    |
| EIC     | Negative | 367.9042 | 3.33 | unknown       | 0         | 0         | 0         | 0         | 145138    | 96728     | 87924     | 99760     | 55476     | 0         | 0         | 0         | 10600     | 76726     | 43883     | 73214     | 101221    | 67029     |           |
| EIC     | Negative | 451.1724 | 3.29 | unknown       | 272552    | 134292    | 148730    | 128648    | 414553    | 309816    | 320498    | 242597    | 299713    | 208223    | 281714    | 205837    | 176643    | 340106    | 241360    | 266369    | 169547    | 268021    | 330357    |
| EIC     | Negative | 297.2797 | 6.67 | unknown       | 1425990   | 2063365   | 1742492   | 3427826   | 2995072   | 2976513   | 2919126   | 3338736   | 3985260   | 3211956   | 2329386   | 3555199   | 2913269   | 2758294   | 2203087   | 2930341   | 3121178   | 3551428   | 3119455   |
| EIC     | Negative | 449.1741 | 3.35 | unknown       | 316616    | 121778    | 201866    | 161645    | 367607    | 465631    | 347716    | 461162    | 620203    | 453514    | 267100    | 238831    | 337726    | 262617    | 372274    | 337726    | 262617    | 426587    | 564712    |
| EIC     | Negative | 370.8956 | 3.33 | unknown       | 60682     | 29876     | 48972     | 18117     | 397943    | 254767    | 230331    | 265439    | 139058    | 25194     | 34459     | 18165     | 19835     | 43429     | 207508    | 105210    | 183621    | 240087    | 175983    |
| EIC     | Negative | 487.2727 | 1.20 | unknown       | 24073     | 56248     | 28341     | 42926     | 103249    | 159730    | 113802    | 59661     | 33737     | 30812     | 39372     | 38250     | 28741     | 40610     | 84435     | 63320     | 78635     | 74717     | 74852     |
| EIC     | Negative | 451.1724 | 3.15 | unknown       | 158511    | 74953     | 97449     | 81987     | 244783    | 175414    | 176914    | 140669    | 175522    | 118427    | 170737    | 136486    | 116173    | 237508    | 136407    | 173422    | 123025    | 158495    | 236070    |
| EIC     | Negative | 258.9080 | 0.58 | unknown       | 5360      | 26315     | 0         | 39183     | 47204     | 79182     | 103269    | 140091    | 111125    | 69678     | 102611    | 107574    | 107969    | 46479     | 84514     | 86125     | 109646    | 125073    | 65630     |
| EIC     | Negative | 369.9016 | 3.33 | unknown       | 0         | 0         | 0         | 0         | 157307    | 102152    | 86210     | 107800    | 52969     | 17664     | 10438     | 0         | 8885      | 11283     | 86233     | 30100     | 75974     | 88287     | 69482     |
| fpHILIC | Positive | 117.1021 | 2.66 | unknown       | 78003     | 0         | 0         | 0         | 1464803   | 1701790   | 1142943   | 828640    | 625021    | 0         | 36457     | 0         | 57283     | 0         | 893334    | 865980    | 1234075   | 621188    | 1172382   |
| EIC     | Negative | 474.2210 | 3.46 | unknown       | 547207    | 293078    | 277763    | 194629    | 1013486   | 750924    | 724637    | 531614    | 67824     | 408825    | 709475    | 462981    | 371255    | 846730    | 572806    | 653689    | 424882    | 532219    | 801572    |
| EIC     | Negative | 368.8983 | 3.33 | unknown       | 161663    | 83352     | 157363    | 42474     | 1410181   | 697532    | 655745    | 733733    | 380168    | 78788     | 86445     | 77749     | 75887     | 82450     | 612661    | 333974    | 536727    | 685926    | 482111    |
| EIC     | Negative | 366.9008 | 3.33 | unknown       | 154426    | 85258     | 134751    | 49793     | 1151960   | 725300    | 644409    | 737878    | 385469    | 87366     | 88266     | 76755     | 68922     | 88305     | 603531    | 288513    | 515394    | 668832    | 513205    |
| EIC     | Negative | 449.1738 | 3.29 | unknown       | 746965    | 349250    | 405718    | 314595    | 1098012   | 857868    | 908396    | 845494    | 546828    | 730880    | 572597    | 460762    | 936447    | 672305    | 716809    | 499251    | 743400    | 933182    |           |
| EIC     | Negative | 643.4252 | 2.78 | unknown       | 264464    | 396317    | 337658    | 388153    | 1432100   | 757724    | 1253936   | 1379386   | 1049419   | 114791    | 235705    | 164848    | 90405     | 1293461   | 67429     | 1094874   | 328165    | 1937919   | 895743    |
| EIC     | Negative | 473.2178 | 3.46 | unknown       | 1856939   | 978686    | 989293    | 658275    | 3562719   | 2465774   | 2543202   | 1773437   | 2327480   | 1436736   | 2531519   | 1592096   | 1334003   | 3017065   | 2000820   | 2162635   | 1333114   | 1852770   | 2718015   |
| EIC     | Negative | 282.2520 | 6.66 | unknown       | 3610920   | 4580718   | 6244073   | 8259298   | 5879463   | 7125767   | 6948838   | 7849973   | 10411226  | 5730108   | 5470785   | 6741416   | 9498906   | 6676482   | 5779968   | 7885359   | 7387244   | 7780951   | 5562788   |
| EIC     | Negative | 450.1774 | 3.15 | unknown       | 106602    | 70568     | 61238     | 46565     | 184381    | 133308    | 135579    | 98918     | 131020    | 86159     | 130027    | 105076    | 84128     | 162981    | 105580    | 138534    | 76197     | 117369    | 153482    |
| fpHILIC | Negative | 242.0864 | 1.03 | unknown       | 965303    | 877885    | 810327    | 1086155   | 1203151   | 1066996   | 1037232   | 933433    | 1189144   | 941746    | 819817    | 765896    | 908262    | 666869    | 734063    | 886794    | 929692    | 819743    | 494187    |
| EIC     | Negative | 349.3287 | 2.79 | unknown       | 2352812   | 2789278   | 2260139   | 2035511   | 8227691   | 4215752   | 6623272   | 8401478   | 7913402   | 2608838   | 3769332   | 1129607   | 4492956   | 7292433   | 3779759   | 7541147   | 2307727   | 993283    | 4310180   |
| EIC     | Negative | 473.2178 | 3.41 | unknown       | 2573063   | 1297341   | 1372053   | 905324    | 4703404   | 3358135   | 3255297   | 2298853   | 2911043   | 1682169   | 3050796   | 1962863   | 1718233   | 3822745   | 2571406   | 2843149   | 1807246   | 2215280   | 3679960   |
| EIC     | Negative | 402.3054 | 2.67 | unknown       | 1019253   | 420462    | 352327    | 363331    | 1063520   | 533036    | 527293    | 349740    | 536030    | 67907     | 539862    | 152076    | 355053    | 402390    | 310011    | 440051    | 928499    | 789036    | 320254    |
| EIC     | Negative | 474.2212 | 3.15 | unknown       | 785033    | 499957    | 446404    | 389002    | 1523194   | 1150196   | 1099806   | 803542    | 1112706   | 632534    | 1054257   | 798183    | 666300    | 1339064   | 863764    | 1120797   | 678246    | 841930    | 1494104   |
| EIC     | Negative | 379.2129 | 0.84 | unknown       | 25373     | 28410     | 31046     | 28000     | 99320     | 68929     | 78864     | 107409    | 59579     | 20159     | 26117     | 27624     | 22372     | 21233     | 61933     | 49945     | 34876     | 102469    | 43070     |
| EIC     | Negative | 529.2768 | 4.82 | unknown       | 412812    | 408709    | 345031    | 312278    | 412812    | 408709    | 345031    | 312278    | 412812    | 408709    | 345031    | 312278    | 412812    | 408709    | 553046    | 553697    | 514063    | 406346    | 774206    |
| EIC     | Negative | 343.1702 | 4.42 | unknown       | 368154    | 514061    | 352962    | 359527    | 609837    | 591275    | 628083    | 668466    | 553007    | 411374    | 414353    | 405284    | 415034    | 379958    | 486134    | 507891    | 474016    | 529662    | 607120    |
| EIC     | Negative | 474.2210 | 3.41 | unknown       | 716368    | 368775    | 387105    | 249750    | 1373996   | 941044    | 950213    | 647287    | 853829    | 499045    | 841922    | 586326    | 4109544   | 1090544   | 736256    | 813710    | 529018    | 630244    | 1023449   |
| EIC     | Negative | 330.3048 | 4.48 | unknown       | 57791     | 142073    | 121484    | 73692     | 187560    | 318421    | 183406    | 236229    | 196355    | 49742     | 0         | 64731     | 51415     | 49381     | 229794    | 134169    | 48279     | 298881    | 154312    |
| EIC     | Negative | 450.2424 | 2.79 | unknown       | 499455    | 673848    | 601951    | 503115    | 1863994   | 976283    | 1561568   | 2001440   | 614147    | 901925    | 246418    | 999071    | 1689800   | 865918    | 1774411   | 532381    | 2415531   | 974702    |           |
| EIC     | Negative | 295.1539 | 2.93 | unknown       | 195202    | 193508    | 205488    | 791717    | 473012    | 276204    | 397830    | 513182    | 962023    | 361955    | 219404    | 323919    | 432851    | 129065    | 140337    | 369898    | 79680     | 504098    | 128634    |
| EIC     | Negative | 412.3521 | 6.71 | unknown       | 411204    | 589261    | 435756    | 556876    | 671937    | 686679    | 868292    | 822134    | 584899    | 481199    | 408973    | 552098    | 914210    | 545853    | 524939    | 551211    | 568791    | 727114    |           |
| EIC     | Negative | 473.2178 | 3.35 | unknown       | 2251903   | 1513364   | 1010576   | 864201    | 6111656   | 4341282   | 4078255   | 2940219   | 4089386   | 1189504   | 3360721   | 2130367   | 1946661   | 4261489   | 3349682   | 3258445   | 2043142   | 3051688   | 4120821   |
| EIC     | Negative | 474.2210 | 3.35 | unknown       | 643164    | 426915    | 312084    | 244652    | 1775937   | 1268113   | 1173336   | 890421    | 1181005   | 382219    | 938552    | 647712    | 555899    | 118899    |           |           |           |           |           |

|         |          |          |      |         |         |         |         |         |          |          |         |         |          |         |         |         |         |         |         |         |         |          |         |
|---------|----------|----------|------|---------|---------|---------|---------|---------|----------|----------|---------|---------|----------|---------|---------|---------|---------|---------|---------|---------|---------|----------|---------|
| fpHILIC | Negative | 241.0831 | 1.03 | unknown | 8425455 | 7002569 | 7247959 | 9926228 | 10845545 | 10312342 | 8634412 | 7633372 | 10515620 | 8486437 | 6307129 | 6600940 | 8477054 | 6235940 | 6150014 | 7145732 | 8450771 | 7575480  | 4495982 |
| EIC     | Negative | 433.3171 | 4.74 | unknown | 202846  | 172810  | 186476  | 267517  | 286396   | 317776   | 221647  | 356761  | 311816   | 269064  | 137607  | 136977  | 185150  | 180664  | 215987  | 192642  | 156712  | 164801   | 293516  |
| EIC     | Negative | 492.3423 | 3.24 | unknown | 84188   | 123837  | 80590   | 68268   | 192458   | 182427   | 159709  | 73615   | 11547    | 125925  | 116996  | 174343  | 206127  | 167612  | 136759  | 89503   | 118591  |          |         |
| EIC     | Negative | 482.3155 | 6.22 | unknown | 566266  | 809099  | 572451  | 699062  | 858316   | 862047   | 685992  | 856833  | 856432   | 497044  | 542559  | 515026  | 442908  | 606805  | 446620  | 397699  | 575975  | 598326   | 629148  |
| fpHILIC | Negative | 345.1542 | 0.47 | unknown | 767033  | 360526  | 676315  | 173951  | 10719394 | 852738   | 797951  | 674015  | 1047348  | 468039  | 690017  | 767909  | 494901  | 253173  | 638728  | 1030785 | 596763  | 544030   | 305064  |
| EIC     | Negative | 270.2159 | 4.30 | unknown | 175940  | 127574  | 193564  | 197656  | 211424   | 171646   | 270452  | 226357  | 207090   | 172483  | 138674  | 127778  | 155847  | 151571  | 116532  | 235805  | 178840  | 200675   | 127185  |
| EIC     | Negative | 475.2680 | 1.71 | unknown | 296710  | 243281  | 218559  | 67808   | 672139   | 255158   | 699001  | 555917  | 380624   | 75193   | 25087   | 27517   | 31395   | 87021   | 65871   | 79671   | 32686   | 101521   | 79226   |
| EIC     | Negative | 433.3180 | 4.84 | unknown | 289675  | 241572  | 218503  | 315583  | 396379   | 491428   | 281658  | 365171  | 503551   | 331381  | 206726  | 245272  | 250350  | 336408  | 334823  | 336824  | 188956  | 188331   | 503880  |
| EIC     | Negative | 432.4205 | 7.14 | unknown | 49751   | 68370   | 40295   | 58438   | 86827    | 76182    | 68324   | 67887   | 112808   | 82000   | 37133   | 86030   | 49540   | 54189   | 61656   | 67564   | 60138   | 67804    | 44296   |
| EIC     | Negative | 483.3076 | 2.67 | unknown | 136851  | 0       | 0       | 0       | 214813   | 113059   | 92150   | 38963   | 86200    | 37524   | 106407  | 19965   | 94439   | 107186  | 55104   | 64863   | 150708  | 131704   | 55406   |
| EIC     | Negative | 300.2626 | 5.44 | unknown | 336724  | 322810  | 302587  | 380004  | 493376   | 488936   | 375269  | 360170  | 340711   | 210389  | 231933  | 212588  | 277788  | 311257  | 292809  | 438972  | 239624  | 349225   | 301042  |
| EIC     | Negative | 424.2436 | 0.85 | unknown | 94844   | 149349  | 97368   | 84753   | 208103   | 225240   | 128096  | 127835  | 110657   | 109725  | 133684  | 56458   | 204438  | 105213  | 120107  | 200912  | 98030   | 184210   | 77609   |
| EIC     | Negative | 491.3381 | 3.24 | unknown | 291777  | 392944  | 233596  | 209463  | 610650   | 572800   | 461014  | 427331  | 784138   | 249865  | 338896  | 399032  | 411189  | 557609  | 628879  | 515759  | 422834  | 286304   | 382361  |
| EIC     | Negative | 269.0877 | 2.27 | unknown | 33158   | 64956   | 0       | 80796   | 274575   | 381001   | 316866  | 134223  | 237863   | 98224   | 18081   | 63587   | 61210   | 64798   | 99545   | 194130  | 243869  | 119093   | 259632  |
| fpHILIC | Positive | 175.0221 | 2.48 | unknown | 357879  | 270611  | 251745  | 57399   | 490923   | 618274   | 324501  | 188993  | 430198   | 212688  | 0       | 0       | 353164  | 698802  | 0       | 0       | 503581  | 63410    | 0       |
| EIC     | Negative | 558.4613 | 6.67 | unknown | 2062532 | 1886065 | 2013027 | 2140354 | 2698981  | 2732807  | 3134347 | 3426294 | 2148027  | 2616862 | 2112174 | 1978836 | 1938538 | 1955448 | 2354703 | 2547882 | 2030488 | 2261232  | 3530302 |
| EIC     | Negative | 628.5624 | 6.59 | unknown | 169442  | 138633  | 165467  | 229334  | 251710   | 215411   | 329529  | 308321  | 555539   | 335377  | 155105  | 55941   | 206884  | 542306  | 229849  | 327722  | 277318  | 224667   | 351575  |
| fpHILIC | Negative | 304.1041 | 2.30 | unknown | 486130  | 461344  | 453857  | 400951  | 740913   | 716280   | 606711  | 413745  | 398824   | 598653  | 500989  | 380588  | 716390  | 605336  | 688154  | 465581  | 700713  | 352032   | 0       |
| fpHILIC | Positive | 508.3765 | 0.58 | unknown | 928887  | 1196932 | 954278  | 1169703 | 1294071  | 1308563  | 1262092 | 917124  | 1262240  | 1055219 | 1318057 | 1215010 | 1283151 | 706131  | 1120238 | 1037529 | 1068480 | 1040042  | 1077527 |
| EIC     | Negative | 474.2212 | 3.00 | unknown | 552608  | 560428  | 376639  | 523124  | 927203   | 968522   | 932238  | 698754  | 1007387  | 867261  | 596125  | 525776  | 624797  | 884287  | 747825  | 790406  | 751944  | 791781   | 1071917 |
| EIC     | Negative | 641.5725 | 6.55 | unknown | 0       | 1095154 | 1291131 | 2106608 | 2141553  | 1913819  | 1821906 | 2141897 | 3613518  | 3022172 | 0       | 0       | 4588105 | 0       | 0       | 3342823 | 3607571 | 0        | 0       |
| EIC     | Negative | 295.2643 | 6.60 | unknown | 2987501 | 3492194 | 4121720 | 6518134 | 4730565  | 4146649  | 4795468 | 4579134 | 4030901  | 5105181 | 5721077 | 4237567 | 3548520 | 6375736 | 6265473 | 6456755 | 4716108 |          |         |
| EIC     | Negative | 627.5574 | 6.58 | unknown | 309166  | 233770  | 265227  | 488885  | 572264   | 543540   | 508904  | 732397  | 1379179  | 509596  | 377633  | 273267  | 377626  | 701705  | 378748  | 558843  | 530187  | 453959   | 855383  |
| EIC     | Negative | 604.2968 | 2.20 | unknown | 0       | 0       | 0       | 43512   | 145191   | 146300   | 240772  | 0       | 186874   | 0       | 0       | 151179  | 125469  | 109404  | 143719  | 185107  | 0       | 218019   |         |
| EIC     | Negative | 269.1403 | 2.11 | unknown | 166134  | 174418  | 195229  | 251024  | 233498   | 322352   | 361755  | 345889  | 257787   | 302094  | 153676  | 150881  | 160607  | 160267  | 179325  | 203411  | 251981  | 374300   | 245242  |
| EIC     | Negative | 325.1127 | 0.71 | unknown | 0       | 0       | 0       | 0       | 68980    | 95478    | 100126  | 215581  | 39119    | 0       | 0       | 0       | 0       | 70210   | 46879   | 54975   | 196416  | 48205    |         |
| EIC     | Negative | 335.2233 | 1.54 | unknown | 0       | 56780   | 150681  | 0       | 161422   | 402296   | 162853  | 319210  | 182117   | 0       | 31518   | 9181    | 10891   | 52269   | 53834   | 60470   | 129262  | 463887   | 99268   |
| EIC     | Negative | 441.2527 | 1.11 | unknown | 13932   | 41514   | 0       | 13635   | 77312    | 179544   | 75078   | 26298   | 72526    | 0       | 13096   | 5492    | 0       | 5321    | 27676   | 0       | 22261   | 24657    | 31940   |
| EIC     | Negative | 494.2167 | 0.76 | unknown | 374463  | 293295  | 556235  | 353659  | 421253   | 400170   | 747151  | 643561  | 392021   | 522007  | 455344  | 339280  | 179454  | 183460  | 379550  | 312485  | 423438  | 205235   | 231100  |
| EIC     | Negative | 283.1011 | 2.74 | unknown | 126697  | 96501   | 65478   | 92530   | 381987   | 656597   | 489643  | 217639  | 368018   | 201703  | 98475   | 93520   | 96670   | 93848   | 154794  | 283683  | 387021  | 118978   | 377802  |
| fpHILIC | Positive | 142.9384 | 4.50 | unknown | 249947  | 351580  | 414680  | 393764  | 378965   | 440944   | 437981  | 446667  | 417017   | 580184  | 477743  | 429752  | 415380  | 445692  | 434094  | 411831  | 392614  | 436897   | 377389  |
| EIC     | Negative | 327.1632 | 3.41 | unknown | 151913  | 190031  | 171732  | 546611  | 743898   | 1174654  | 933099  | 638516  | 680985   | 523772  | 218943  | 219148  | 205356  | 237410  | 312151  | 581964  | 716120  | 771526   | 763405  |
| EIC     | Negative | 308.2679 | 6.57 | unknown | 4154468 | 4764432 | 4910728 | 6355316 | 6326979  | 5202188  | 6933265 | 7105234 | 9292802  | 5656531 | 6851932 | 7854383 | 7077267 | 6009453 | 4962911 | 5087147 | 6536977 | 10823704 | 6553695 |
| EIC     | Negative | 394.2685 | 1.71 | unknown | 583477  | 298802  | 412156  | 89670   | 918299   | 273275   | 926273  | 850986  | 551230   | 174551  | 42323   | 36681   | 40223   | 92825   | 95009   | 70084   | 57505   | 288593   | 77037   |
| EIC     | Negative | 454.2903 | 1.71 | unknown | 844799  | 431736  | 642988  | 108243  | 1285799  | 395837   | 1322530 | 1218921 | 824577   | 189976  | 65556   | 64725   | 61094   | 153027  | 105716  | 100378  | 83421   | 368104   | 105669  |
| fpHILIC | Positive | 836.6094 | 0.43 | unknown | 2315147 | 2387643 | 1681636 | 2049399 | 3098427  | 2897617  | 2744378 | 2266204 | 2734689  | 1862664 | 2242515 | 2459309 | 2302543 | 2461317 | 2311593 | 2926059 | 2680374 | 2128861  | 2301167 |
| fpHILIC | Positive | 155.0096 | 2.73 | unknown | 624238  | 639966  | 668769  | 1120430 | 667519   | 926390   | 1183410 | 1176315 | 489590   | 690866  | 1382887 | 675647  | 166200  | 609686  | 609686  | 1382887 | 675647  | 764022   | 592268  |
| EIC     | Negative | 301.1804 | 3.58 | unknown | 276996  | 235247  | 632923  | 791845  | 442841   | 283730   | 690980  | 674380  | 891921   | 738497  | 340948  | 252579  | 223377  | 166200  | 334305  | 377963  | 539331  | 231932   | 156440  |
| EIC     | Negative | 433.3175 | 4.60 | unknown | 407366  | 298837  | 321092  | 437642  | 477383   | 550790   | 406265  | 563737  | 478055   | 260456  | 346920  | 385668  | 464856  | 457351  | 625701  | 278466  | 185641  | 591144   | 0       |
| EIC     | Negative | 401.3024 | 2.67 | unknown | 4441873 | 1744123 | 1374558 | 1560241 | 4505651  | 2294653  | 2281833 | 1238885 | 2026616  | 1968668 | 2329544 | 633089  | 2318878 | 1764560 | 1294854 | 1877168 | 3916607 | 3235268  | 1391951 |
| fpHILIC | Negative | 117.0710 | 0.54 | unknown | 801822  | 266786  | 961311  | 1156444 | 2224838  | 437311   | 1875210 | 822605  | 2554967  | 1589877 | 0       | 168753  | 172993  | 0       | 0       | 357443  | 149887  | 1223831  | 0       |
| fpHILIC | Positive | 199.0890 | 3.71 | unknown | 797912  | 807854  | 878428  | 866408  | 975426   | 1004134  | 1015300 | 856329  | 893302   | 889172  | 907359  | 954199  | 832160  | 786218  | 967897  | 932738  | 852754  | 819563   | 818732  |
| fpHILIC | Negative | 133.9917 | 0.88 | unknown | 500513  | 1174177 | 1773910 | 2740799 | 2607836  | 2487714  | 2442811 | 2291897 | 3130496  | 3513646 | 2015935 | 3857520 | 1174558 | 2529063 | 712339  | 1570771 | 2111169 | 1483313  | 2626527 |
| EIC     | Negative | 324.1432 | 3.43 | unknown | 95467   | 98589   | 122803  | 187157  | 158483   | 117073   | 138066  | 171112  | 207690   | 174896  | 125309  | 187188  | 160146  | 70247   | 68534   | 134422  | 128069  | 168892   | 84609   |
| EIC     | Negative | 449.3279 | 3.34 | unknown | 2150111 | 3707054 | 2038289 | 1641058 | 4901364  | 474010   | 4847195 | 3478544 | 4973871  | 1361162 | 2833382 | 2231553 | 2455168 | 1934439 | 4145682 | 4973871 | 4405302 | 2976159  | 3761762 |
| EIC     | Negative | 509.7611 | 6.23 | unknown | 0       | 31086   | 59416   | 0       | 82811    | 112384   | 160704  | 422613  | 218372   | 154722  | 179028  | 127042  | 123046  | 80170   | 90756   | 102378  | 135456  | 196692   | 174351  |
| fpHILIC | Negative | 105.0442 | 0.96 | unknown | 137208  | 174336  | 312738  | 578133  | 392428   | 331084   | 295527  | 348384  | 862507   | 778826  | 647196  | 328613  | 314792  | 259329  | 363132  | 464983  | 195917  | 334149   | 176725  |
| EIC     | Negative | 393.2656 | 1.71 | unknown | 2297125 | 1225465 | 1472910 | 314042  | 410311   | 1135632  | 3626913 | 3363471 | 1800788  | 491225  | 143395  | 152639  | 125289  | 461394  | 354356  | 225968  | 220793  | 637327   | 292928  |
| EIC     | Negative | 403.3059 | 6.51 | unknown | 386808  | 244100  | 431918  | 762600  | 527304   | 550551   | 475663  | 778013  | 889756   | 547128  | 164850  | 445663  | 533568  | 703827  | 609139  | 638085  | 582028  | 633021   | 738608  |
| EIC     | Negative | 379.2130 | 0.97 | unknown | 74069   | 63029</ |         |         |          |          |         |         |          |         |         |         |         |         |         |         |         |          |         |

|         |          |          |      |         |          |          |          |          |           |           |          |          |           |          |          |          |          |          |          |          |          |          |          |        |
|---------|----------|----------|------|---------|----------|----------|----------|----------|-----------|-----------|----------|----------|-----------|----------|----------|----------|----------|----------|----------|----------|----------|----------|----------|--------|
| EIC     | Negative | 425.3637 | 6.58 | unknown | 1275780  | 1077950  | 1162607  | 1646768  | 1592219   | 1121332   | 1516492  | 1659036  | 2316612   | 1561913  | 1236298  | 873332   | 1330456  | 758872   | 965636   | 1303202  | 928093   | 955526   | 920480   |        |
| EIC     | Negative | 461.1948 | 3.11 | unknown | 82132    | 63323    | 31860    | 62614    | 96075     | 67603     | 75032    | 82009    | 82312     | 71787    | 76983    | 70184    | 57545    | 86915    | 77360    | 110321   | 61258    | 52287    | 79840    |        |
| EIC     | Negative | 511.9545 | 2.67 | unknown | 115475   | 108936   | 105643   | 105643   | 191136    | 109959    | 169961   | 187212   | 124201    | 104864   | 130734   | 70900    | 92013    | 134392   | 146729   | 141786   | 104552   | 152033   | 118377   |        |
| fpHILIC | Negative | 273.0771 | 1.15 | unknown | 174274   | 169661   | 144707   | 246754   | 408552    | 280902    | 311596   | 189004   | 364129    | 298929   | 181428   | 265964   | 610145   | 248045   | 128009   | 240729   | 262606   | 159234   | 201021   |        |
| EIC     | Negative | 459.2725 | 3.01 | unknown | 650266   | 371070   | 625867   | 0        | 1790543   | 239848    | 1507431  | 360508   | 403208    | 202440   | 97408    | 95082    | 109851   | 153032   | 130424   | 128949   | 120156   | 311510   | 152410   |        |
| EIC     | Negative | 378.2739 | 2.27 | unknown | 441847   | 1041275  | 1287756  | 489356   | 4236674   | 1189404   | 3421125  | 3571150  | 843220    | 206900   | 38679    | 161045   | 0        | 0        | 230783   | 0        | 0        | 482720   | 601562   |        |
| EIC     | Negative | 377.2703 | 2.27 | unknown | 5516179  | 4147737  | 5126436  | 1971411  | 16282239  | 4607660   | 13720251 | 14385437 | 3349279   | 117366   | 552622   | 602455   | 579021   | 252835   | 826064   | 761694   | 470905   | 1786652  | 2122685  |        |
| EIC     | Negative | 393.1729 | 5.49 | unknown | 231889   | 174488   | 205036   | 289954   | 311296    | 405674    | 261556   | 262322   | 348285    | 244692   | 186213   | 193759   | 155124   | 196384   | 182655   | 355000   | 281517   | 342350   | 296667   |        |
| EIC     | Negative | 524.3312 | 2.24 | unknown | 0        | 34805    | 0        | 0        | 117957    | 22211     | 92473    | 96534    | 47503     | 35567    | 25075    | 31902    | 15983    | 33208    | 40833    | 70237    | 26330    | 143052   | 56452    |        |
| EIC     | Negative | 439.2975 | 2.27 | unknown | 237897   | 162894   | 264522   | 43224    | 526670    | 150525    | 428053   | 467921   | 134105    | 0        | 17449    | 24444    | 26296    | 7767     | 32304    | 27354    | 16485    | 59747    | 78746    |        |
| EIC     | Negative | 460.2768 | 3.28 | unknown | 134705   | 145970   | 250878   | 104268   | 454605    | 74013     | 675833   | 382584   | 427502    | 0        | 0        | 0        | 0        | 0        | 0        | 0        | 13559    | 0        | 72754    |        |
| EIC     | Negative | 437.2912 | 2.12 | unknown | 1056065  | 1179731  | 908504   | 480016   | 4772489   | 1017231   | 6576887  | 3617362  | 2729694   | 733001   | 268965   | 176858   | 245568   | 164325   | 0        | 272861   | 372935   | 382360   | 827751   | 520380 |
| EIC     | Negative | 616.3425 | 1.06 | unknown | 166068   | 37329    | 79596    | 18996    | 165025    | 131634    | 167133   | 159047   | 36583     | 7105     | 0        | 0        | 0        | 0        | 0        | 0        | 0        | 17624    | 0        |        |
| EIC     | Negative | 333.1115 | 0.90 | unknown | 193230   | 91536    | 168595   | 117481   | 257195    | 261076    | 233435   | 162690   | 285681    | 1286304  | 244953   | 170039   | 153775   | 400451   | 207965   | 212727   | 151449   | 192773   | 343879   |        |
| EIC     | Negative | 378.2738 | 2.12 | unknown | 407648   | 489959   | 384422   | 236256   | 1918773   | 389727    | 2588453  | 1521970  | 1048453   | 255005   | 0        | 49231    | 31412    | 0        | 0        | 0        | 44136    | 400942   | 46293    |        |
| EIC     | Negative | 423.2394 | 0.85 | unknown | 281939   | 576948   | 372661   | 327317   | 689786    | 735557    | 463499   | 517365   | 350694    | 356247   | 469579   | 169840   | 608727   | 462495   | 475530   | 673537   | 354878   | 621024   | 321001   |        |
| fpHILIC | Positive | 244.1100 | 2.71 | unknown | 538522   | 658065   | 386262   | 427007   | 807816    | 695765    | 602195   | 609676   | 634492    | 339373   | 502102   | 621162   | 699021   | 761848   | 576926   | 582844   | 652210   | 582674   | 624372   |        |
| EIC     | Negative | 438.2946 | 2.27 | unknown | 969613   | 729595   | 954799   | 381947   | 2980136   | 844348    | 2412219  | 2670397  | 588541    | 205149   | 118822   | 126385   | 106862   | 49428    | 176249   | 135594   | 94519    | 340781   | 368710   |        |
| EIC     | Negative | 299.1880 | 3.71 | unknown | 233460   | 123363   | 210280   | 403653   | 276701    | 219218    | 230855   | 355843   | 518029    | 282135   | 169653   | 277543   | 263432   | 199236   | 170199   | 306545   | 222016   | 370054   | 154417   |        |
| EIC     | Negative | 297.1532 | 4.30 | unknown | 313605   | 228779   | 274437   | 623303   | 828272    | 1647339   | 807210   | 692792   | 846585    | 536538   | 298592   | 370297   | 270852   | 338482   | 405575   | 899330   | 806993   | 887343   | 681105   |        |
| fpHILIC | Negative | 103.4001 | 0.96 | unknown | 34496960 | 29620530 | 43569808 | 90194496 | 65964784  | 36133388  | 53039560 | 47299372 | 133893896 | 51053232 | 98013040 | 55152924 | 61028868 | 37286716 | 51293472 | 97796840 | 24881346 | 51762516 | 26546764 |        |
| EIC     | Negative | 437.2910 | 2.27 | unknown | 3434961  | 2679597  | 3368096  | 1852587  | 10714078  | 3000278   | 8621206  | 9444734  | 2139348   | 730315   | 341175   | 370831   | 317191   | 188936   | 502721   | 505663   | 294163   | 1199254  | 1363498  |        |
| EIC     | Negative | 319.1908 | 1.26 | unknown | 26921    | 17947    | 36755    | 24887    | 110620    | 60296     | 92841    | 32194    | 21865     | 27658    | 18577    | 0        | 3686     | 7955     | 74393    | 23359    | 32725    | 26951    | 19394    |        |
| EIC     | Negative | 404.2162 | 1.74 | unknown | 147512   | 307158   | 135134   | 177117   | 309723    | 271347    | 326622   | 344718   | 268317    | 178161   | 318942   | 119709   | 263306   | 268980   | 247306   | 468194   | 275119   | 113393   | 320901   |        |
| EIC     | Negative | 459.2729 | 3.28 | unknown | 530144   | 534876   | 742371   | 353926   | 1572671   | 247430    | 2495508  | 1443844  | 1475116   | 0        | 50927    | 59464    | 62416    | 0        | 12460    | 102703   | 0        | 13723    | 258695   |        |
| EIC     | Negative | 467.2965 | 5.91 | unknown | 415473   | 640173   | 465909   | 556539   | 667334    | 737122    | 487187   | 604208   | 638104    | 403246   | 435816   | 450329   | 368390   | 509862   | 344620   | 361653   | 471581   | 399252   | 428319   |        |
| EIC     | Negative | 338.2361 | 2.15 | unknown | 408976   | 416985   | 327323   | 398993   | 448109    | 428363    | 493363   | 534452   | 450260    | 461281   | 430042   | 476644   | 442978   | 451881   | 437315   | 427947   | 460249   | 412867   | 453015   |        |
| EIC     | Negative | 534.3324 | 4.98 | unknown | 545001   | 669549   | 439117   | 691970   | 633155    | 647106    | 554516   | 628348   | 850366    | 515335   | 478150   | 625606   | 432531   | 776808   | 544046   | 483029   | 595321   | 503270   | 554821   |        |
| EIC     | Negative | 453.2864 | 1.71 | unknown | 2861503  | 1921251  | 1875061  | 525018   | 4569004   | 1447723   | 5825011  | 5446328  | 2843310   | 687724   | 185753   | 204636   | 226889   | 464566   | 444294   | 364728   | 288864   | 1231351  | 465877   |        |
| fpHILIC | Negative | 131.0463 | 2.86 | unknown | 2307393  | 1695939  | 1891302  | 0        | 2607461   | 3900726   | 2099285  | 2130163  | 2485000   | 3057351  | 2151260  | 2479317  | 2164535  | 2270467  | 3683748  | 2629267  | 2793797  | 2114628  | 1413011  |        |
| fpHILIC | Positive | 810.6008 | 0.43 | unknown | 32552266 | 38707156 | 30792644 | 34803348 | 48487276  | 42860000  | 44526092 | 46632872 | 33289980  | 35937588 | 36803888 | 42384604 | 38008792 | 38813240 | 37453892 | 38702408 | 50427196 | 39910196 | 38745068 |        |
| fpHILIC | Negative | 123.9888 | 1.15 | unknown | 170135   | 273382   | 242594   | 348172   | 618646    | 477638    | 513941   | 281603   | 546342    | 481017   | 315111   | 479394   | 966519   | 360735   | 215617   | 365814   | 424492   | 264600   | 372048   |        |
| fpHILIC | Negative | 125.0247 | 0.95 | unknown | 644226   | 604782   | 626840   | 1408548  | 583351    | 984460    | 955142   | 968499   | 1898872   | 1040526  | 785815   | 615600   | 910073   | 1270500  | 578975   | 1455189  | 833907   | 1037623  | 520087   |        |
| EIC     | Negative | 404.9993 | 0.49 | unknown | 662453   | 463941   | 549663   | 541653   | 1185044   | 614439    | 941587   | 707007   | 524492    | 670427   | 474082   | 378513   | 568416   | 2942241  | 749014   | 448999   | 518939   | 510761   | 576994   |        |
| EIC     | Negative | 403.1721 | 3.43 | unknown | 359920   | 373063   | 388603   | 782391   | 559127    | 445215    | 549472   | 657938   | 80756     | 616556   | 515101   | 742608   | 630302   | 236099   | 277924   | 589661   | 555794   | 680974   | 289551   |        |
| EIC     | Negative | 486.0073 | 0.49 | unknown | 961082   | 715634   | 781326   | 774562   | 1481149   | 895698    | 1307971  | 1011427  | 7246345   | 952818   | 651493   | 595406   | 766239   | 3202322  | 1053887  | 628452   | 772561   | 784558   | 812512   |        |
| fpHILIC | Negative | 125.0357 | 1.03 | unknown | 21238222 | 17519168 | 17204456 | 24143998 | 22964984  | 24525250  | 21252382 | 17454582 | 2263378   | 19776170 | 15267138 | 17232308 | 18518026 | 14248706 | 14482947 | 17009698 | 18626038 | 15996444 | 11709621 |        |
| fpHILIC | Negative | 870.5852 | 0.42 | unknown | 5918061  | 5961727  | 4638980  | 5354569  | 8967381   | 7562357   | 7635710  | 7083609  | 5002703   | 6544508  | 6236603  | 7507766  | 7103513  | 5851599  | 7479993  | 6342959  | 9149750  | 6179635  | 6493559  |        |
| EIC     | Negative | 453.2822 | 5.23 | unknown | 18434413 | 23135709 | 16727334 | 23729381 | 25125802  | 24255678  | 21022296 | 20827748 | 29572252  | 15873500 | 18478169 | 18854923 | 16525653 | 23381001 | 16093798 | 18218251 | 20074659 | 15839216 | 18490951 |        |
| EIC     | Negative | 375.2558 | 3.13 | unknown | 1249217  | 1811620  | 1812463  | 734197   | 7897756   | 872547    | 14623296 | 6436491  | 7305688   | 48484    | 153669   | 145891   | 176182   | 42650    | 63900    | 339206   | 50795    | 71236    | 1055100  |        |
| EIC     | Negative | 542.2741 | 1.70 | unknown | 0        | 142849   | 60497    | 100380   | 103905    | 199150    | 162876   | 107704   | 0         | 41576    | 135810   | 102910   | 89642    | 99321    | 99750    | 95223    | 93433    | 114045   | 0        |        |
| EIC     | Negative | 615.3389 | 1.06 | unknown | 467328   | 95751    | 232451   | 58451    | 452483    | 362097    | 476092   | 444305   | 103471    | 24220    | 6283     | 0        | 8022     | 0        | 0        | 0        | 0        | 51240    | 11479    |        |
| fpHILIC | Positive | 905.5927 | 0.37 | unknown | 1120162  | 1150890  | 1011129  | 1439938  | 1521059   | 1161421   | 1063877  | 1412798  | 1060962   | 1705004  | 1466784  | 1273440  | 1360333  | 1215693  | 1184966  | 1344975  | 1372290  | 1194079  | 1594545  |        |
| fpHILIC | Positive | 813.6127 | 0.43 | unknown | 1753435  | 2155829  | 1663357  | 1803253  | 2478508   | 2313835   | 2444178  | 2547359  | 1754953   | 2114692  | 2034153  | 1963068  | 2092197  | 2250696  | 1899110  | 1697170  | 2731549  | 2001443  | 1928570  |        |
| EIC     | Negative | 334.2834 | 6.59 | unknown | 388604   | 440153   | 448167   | 572091   | 477138    | 646260    | 802930   | 661947   | 555730    | 628155   | 609031   | 575466   | 654515   | 552562   | 416676   | 427924   | 685389   | 711200   | 571107   |        |
| fpHILIC | Negative | 104.0435 | 0.96 | unknown | 1554028  | 1358201  | 1937374  | 4089907  | 3066058   | 1615396   | 2490736  | 2179955  | 6279208   | 2245743  | 4755344  | 2673963  | 2789012  | 1861166  | 2300777  | 3776796  | 1368000  | 2398625  | 1147310  |        |
| EIC     | Negative | 508.3387 | 2.83 | unknown | 48471    | 225614   | 85601    | 0        | 614762    | 138764    | 561685   | 395333   | 317025    | 80868    | 197524   | 253136   | 133781   | 235946   | 275166   | 281464   | 248385   | 259680   | 233925   |        |
| EIC     | Negative | 586.3626 | 1.24 | unknown | 0        | 0        | 56308    | 25621    | 135267    | 0         | 127975   | 67952    | 251892    | 0        | 6572     | 0        | 125535   | 0        | 7102     | 0        | 0        | 0        | 0        |        |
| EIC     | Negative | 452.2790 | 5.23 | unknown | 75981857 | 97309791 | 68773881 | 99270563 | 105257987 | 101784565 | 87272884 | 86915695 | 123       |          |          |          |          |          |          |          |          |          |          |        |

|         |          |          |      |         |          |           |          |          |           |           |           |           |          |          |           |           |           |          |           |           |           |          |           |
|---------|----------|----------|------|---------|----------|-----------|----------|----------|-----------|-----------|-----------|-----------|----------|----------|-----------|-----------|-----------|----------|-----------|-----------|-----------|----------|-----------|
| fpHILIC | Positive | 387.1901 | 3.71 | unknown | 500686   | 407569    | 362602   | 499121   | 576472    | 724222    | 557336    | 456886    | 548805   | 414230   | 462735    | 460829    | 468963    | 412762   | 488307    | 486421    | 557597    | 455564   | 425039    |
| fpHILIC | Negative | 110.9758 | 0.94 | unknown | 2085331  | 1027813   | 951693   | 611976   | 4641911   | 2393880   | 4301840   | 1209754   | 2209361  | 451075   | 464428    | 646637    | 698788    | 832940   | 773699    | 1979780   | 786169    | 903697   | 1067197   |
| EIC     | Negative | 383.2996 | 5.63 | unknown | 0        | 0         | 0        | 0        | 305751    | 264185    | 284187    | 0         | 0        | 0        | 0         | 0         | 0         | 121327   | 203788    | 0         | 256446    | 0        | 0         |
| EIC     | Negative | 322.9959 | 0.49 | unknown | 399888   | 318852    | 333429   | 358873   | 758076    | 397409    | 540237    | 443882    | 364095   | 400347   | 320788    | 242331    | 331787    | 2381938  | 431451    | 256212    | 350561    | 323213   | 350581    |
| fpHILIC | Positive | 197.0892 | 3.07 | unknown | 435727   | 255203    | 258134   | 249408   | 669108    | 1052916   | 419187    | 270136    | 664951   | 179473   | 246504    | 216177    | 199453    | 195132   | 428120    | 679542    | 276867    | 622432   | 241737    |
| EIC     | Negative | 446.3787 | 6.70 | unknown | 250461   | 141085    | 186697   | 344919   | 260182    | 254640    | 309264    | 286454    | 521150   | 220152   | 352103    | 301602    | 429822    | 265784   | 283064    | 276958    | 276411    | 294621   | 370493    |
| EIC     | Negative | 463.2555 | 2.72 | unknown | 57406    | 147560    | 68487    | 247283   | 215772    | 226376    | 182520    | 159272    | 294029   | 128423   | 171588    | 262965    | 210760    | 195793   | 232819    | 216865    | 199113    | 144833   | 200886    |
| EIC     | Negative | 425.2561 | 0.73 | unknown | 103961   | 178415    | 144064   | 245078   | 401179    | 238969    | 304778    | 412045    | 186096   | 150920   | 226007    | 181947    | 318863    | 118079   | 252304    | 323880    | 231102    | 414694   | 126633    |
| EIC     | Negative | 333.2709 | 6.53 | unknown | 690982   | 695141    | 659132   | 1252795  | 779217    | 1169540   | 1203389   | 1951647   | 1284251  | 1053621  | 1471590   | 1175562   | 1405619   | 1192816  | 989070    | 1240180   | 1347199   | 127220   | 874027    |
| EIC     | Negative | 361.2022 | 1.63 | unknown | 3095854  | 2999375   | 1627736  | 923135   | 3586685   | 11064485  | 3517744   | 3252118   | 4230294  | 1985623  | 3245554   | 980899    | 4271500   | 6276229  | 3365524   | 8376153   | 1390005   | 5060395  | 3156525   |
| EIC     | Negative | 535.1625 | 1.63 | unknown | 0        | 82263     | 0        | 0        | 74329     | 199900    | 69416     | 0         | 65090    | 0        | 61585     | 0         | 83638     | 84882    | 46180     | 100819    | 17503     | 42753    | 45997     |
| fpHILIC | Positive | 308.0907 | 3.62 | unknown | 200315   | 401079    | 306706   | 465493   | 882569    | 1654612   | 1137146   | 477071    | 656303   | 415025   | 582274    | 812300    | 815148    | 642673   | 528362    | 663650    | 986304    | 709651   | 783729    |
| EIC     | Negative | 520.2324 | 0.98 | unknown | 161014   | 137870    | 208329   | 166569   | 170293    | 165958    | 280434    | 204402    | 231568   | 257251   | 234305    | 119136    | 70340     | 99420    | 163787    | 149655    | 180949    | 64325    | 115670    |
| EIC     | Negative | 527.2379 | 2.14 | unknown | 0        | 251761    | 214650   | 136586   | 343765    | 287599    | 406576    | 213101    | 302487   | 0        | 0         | 0         | 0         | 0        | 0         | 36321     | 0         | 0        | 0         |
| EIC     | Negative | 459.2735 | 2.12 | unknown | 62753    | 281710    | 155115   | 0        | 874819    | 224713    | 1051712   | 379122    | 538437   | 43675    | 72924     | 52183     | 49818     | 62492    | 73924     | 107600    | 112309    | 172285   | 109573    |
| EIC     | Negative | 360.2994 | 6.60 | unknown | 478534   | 451998    | 338974   | 450305   | 539475    | 578145    | 825143    | 613585    | 583731   | 706336   | 536437    | 743032    | 596218    | 422929   | 340049    | 465798    | 626686    | 897046   | 564473    |
| EIC     | Negative | 329.1521 | 3.08 | unknown | 0        | 0         | 0        | 0        | 415471    | 457964    | 601996    | 0         | 0        | 0        | 386903    | 316919    | 419224    | 570774   | 430633    | 0         | 0         | 234309   | 0         |
| EIC     | Negative | 423.2394 | 0.73 | unknown | 138474   | 609519    | 212682   | 207153   | 1258778   | 490006    | 932298    | 718313    | 529080   | 220345   | 418039    | 81224     | 295764    | 220043   | 393061    | 753636    | 581980    | 695537   | 260479    |
| EIC     | Negative | 338.2365 | 3.54 | unknown | 0        | 84878     | 0        | 0        | 106086    | 108450    | 0         | 173190    | 138490   | 174683   | 108610    | 177817    | 136913    | 57017    | 73594     | 0         | 0         | 65303    | 0         |
| EIC     | Negative | 337.2327 | 3.11 | unknown | 0        | 156600    | 0        | 0        | 158758    | 154474    | 154293    | 165860    | 163112   | 198283   | 161631    | 151163    | 0         | 155363   | 0         | 0         | 151264    | 207621   | 0         |
| EIC     | Negative | 507.3332 | 2.83 | unknown | 2552263  | 693127    | 379332   | 108893   | 1921207   | 379882    | 1802562   | 1047124   | 914029   | 276711   | 598367    | 776526    | 388827    | 777066   | 850414    | 899107    | 835675    | 815173   | 660461    |
| fpHILIC | Positive | 200.0536 | 2.05 | unknown | 233476   | 158872    | 372086   | 57845    | 748842    | 601156    | 252626    | 132977    | 55887    | 0        | 0         | 492162    | 535391    | 0        | 0         | 653954    | 0         | 0        | 0         |
| EIC     | Negative | 378.2743 | 3.01 | unknown | 1707579  | 790968    | 2069289  | 344616   | 4191438   | 534392    | 3306106   | 3328961   | 784756   | 398713   | 0         | 81033     | 121698    | 131159   | 97515     | 93724     | 108954    | 566297   | 135613    |
| EIC     | Negative | 454.2848 | 5.23 | unknown | 3184827  | 4011670   | 2858506  | 4183840  | 4411043   | 4236575   | 3599649   | 5011890   | 5011890  | 2777718  | 3189828   | 3346182   | 2891455   | 4005556  | 2798744   | 3211227   | 355431    | 2765467  | 3174188   |
| EIC     | Negative | 337.2328 | 4.99 | unknown | 0        | 270735    | 0        | 0        | 261531    | 173743    | 271297    | 413144    | 250294   | 0        | 273737    | 0         | 0         | 306044   | 421617    | 0         | 252523    | 0        | 251367    |
| EIC     | Negative | 393.2652 | 1.97 | unknown | 0        | 158507    | 0        | 0        | 477045    | 615392    | 815029    | 0         | 327226   | 0        | 0         | 0         | 11044     | 29378    | 18603     | 41461     | 0         | 0        | 51401     |
| EIC     | Negative | 454.1863 | 0.69 | unknown | 42048    | 46803     | 80263    | 58030    | 58666     | 60910     | 108471    | 110679    | 56711    | 60281    | 74482     | 58888     | 31755     | 21848    | 64339     | 47518     | 70162     | 40840    | 25907     |
| EIC     | Negative | 538.2430 | 1.14 | unknown | 51353    | 50420     | 41456    | 31231    | 50416     | 68487     | 98991     | 88709     | 43716    | 74922    | 57764     | 83809     | 62984     | 50693    | 43429     | 56903     | 63724     | 44711    | 63816     |
| EIC     | Negative | 377.2705 | 3.01 | unknown | 6849964  | 2881137   | 8117411  | 1560765  | 16374780  | 1792073   | 13253134  | 13197395  | 3325833  | 1661760  | 603727    | 606734    | 556875    | 1004339  | 795625    | 731276    | 703626    | 2424224  | 1038171   |
| EIC     | Negative | 319.2786 | 4.00 | unknown | 323457   | 314222    | 297382   | 277888   | 337209    | 316912    | 295021    | 309696    | 294220   | 255893   | 294761    | 289017    | 305043    | 291022   | 292634    | 301833    | 339664    | 271976   | 292969    |
| EIC     | Negative | 495.3111 | 6.17 | unknown | 0        | 376841    | 63947    | 109851   | 491159    | 355624    | 502268    | 256729    | 416016   | 124529   | 381055    | 200695    | 346628    | 301642   | 474380    | 405441    | 251389    | 323236   | 329529    |
| EIC     | Negative | 428.3172 | 6.53 | unknown | 613845   | 397716    | 620979   | 675712   | 419442    | 1350908   | 1138891   | 977741    | 1348997  | 1055130  | 853229    | 764520    | 599914    | 659270   | 584820    | 1138974   | 713209    | 985080   | 402008    |
| EIC     | Negative | 457.2581 | 3.14 | unknown | 100998   | 156053    | 137224   | 51352    | 558478    | 73212     | 1019207   | 34426     | 0        | 0        | 10268     | 0         | 0         | 487751   | 0         | 41861     | 0         | 0        | 80936     |
| EIC     | Negative | 431.3018 | 4.91 | unknown | 913001   | 596012    | 561035   | 856603   | 832107    | 1123035   | 666726    | 1116962   | 1151229  | 892744   | 513045    | 582166    | 678028    | 844613   | 819160    | 796119    | 694305    | 629579   | 1033978   |
| EIC     | Negative | 251.1323 | 3.91 | unknown | 2497912  | 973497    | 771710   | 434638   | 3216230   | 870636    | 2354783   | 599554    | 607047   | 781525   | 960747    | 197584    | 1615136   | 823646   | 599534    | 646262    | 2106821   | 1036295  | 2174182   |
| EIC     | Negative | 322.9959 | 0.55 | unknown | 26714    | 85949     | 70947    | 92836    | 148254    | 84628     | 144889    | 175028    | 91288    | 26115    | 68416     | 89810     | 96073     | 209832   | 80785     | 63867     | 93472     | 104772   | 24676     |
| EIC     | Negative | 503.2872 | 4.46 | unknown | 491327   | 842254    | 514506   | 500285   | 648907    | 1202725   | 771624    | 591171    | 646242   | 663616   | 657597    | 642296    | 756587    | 764897   | 708666    | 537821    | 705698    | 493609   | 762268    |
| EIC     | Negative | 343.1388 | 1.56 | unknown | 37872    | 74239     | 90650    | 0        | 88301     | 78479     | 103354    | 76717     | 95050    | 0        | 215970    | 124708    | 97314     | 297897   | 53703     | 108847    | 51026     | 0        | 74578     |
| EIC     | Negative | 588.3332 | 4.33 | unknown | 330729   | 416828    | 323162   | 366144   | 475741    | 551889    | 571578    | 452667    | 378698   | 359537   | 413928    | 472717    | 448754    | 366889   | 459657    | 508891    | 493016    | 366576   | 440507    |
| EIC     | Negative | 437.2911 | 3.01 | unknown | 4506119  | 1984833   | 5590438  | 1014100  | 11320256  | 1227311   | 8736390   | 8738373   | 2252801  | 1122958  | 424028    | 440607    | 389506    | 684041   | 553538    | 494570    | 498490    | 1625851  | 687229    |
| EIC     | Negative | 438.2945 | 3.01 | unknown | 1255267  | 541575    | 1945418  | 292138   | 3159235   | 327775    | 2394370   | 2400798   | 651818   | 138406   | 118885    | 119891    | 113462    | 183548   | 171714    | 143333    | 137508    | 460115   | 208532    |
| EIC     | Negative | 376.1823 | 2.58 | unknown | 0        | 0         | 0        | 0        | 505138    | 0         | 519997    | 0         | 265731   | 0        | 0         | 0         | 0         | 0        | 0         | 0         | 938714    | 0        | 0         |
| EIC     | Negative | 238.9941 | 0.49 | unknown | 641722   | 454165    | 446566   | 472503   | 1134672   | 614208    | 811934    | 582457    | 435104   | 579662   | 495560    | 356984    | 484397    | 4518316  | 642564    | 385286    | 464416    | 473408   | 522733    |
| EIC     | Negative | 584.3837 | 6.12 | unknown | 6109743  | 8079850   | 6309920  | 6804799  | 7444001   | 8279997   | 8044376   | 7521628   | 6787180  | 802112   | 7244483   | 7641064   | 7330095   | 7232816  | 6887556   | 6592108   | 7558472   | 6290332  | 7353689   |
| EIC     | Negative | 437.2913 | 3.28 | unknown | 54451    | 56567     | 74917    | 34747    | 160160    | 11054     | 200530    | 10668     | 10151    | 0        | 0         | 0         | 0         | 0        | 0         | 0         | 13319     | 25994    | 0         |
| EIC     | Negative | 602.3293 | 3.03 | unknown | 109999   | 116905    | 108997   | 152341   | 126739    | 113704    | 232325    | 128756    | 224672   | 158151   | 115849    | 98357     | 112564    | 101775   | 97634     | 122062    | 252205    | 174563   | 82396     |
| EIC     | Negative | 485.0032 | 0.49 | unknown | 6529242  | 5186458   | 5551518  | 6046197  | 11135987  | 6596298   | 9034341   | 7018673   | 5420401  | 7105714  | 5362132   | 4223011   | 5842623   | 24212895 | 7537644   | 4760690   | 5739450   | 6047762  | 6084504   |
| EIC     | Negative | 466.3939 | 5.91 | unknown | 1625335  | 2394845   | 1940009  | 2212153  | 2561360   | 2834383   | 1948290   | 2289270   | 2424908  | 1482911  | 1626885   | 1465290   | 1326235   | 1978845  | 1330836   | 1374065   | 1821298   | 1469103  | 1715826   |
| EIC     | Negative | 363.2371 | 6.71 | unknown | 571819   | 610901    | 545225   | 1231120  | 866872    | 964431    | 927773    | 935665    | 947106   | 944659   | 1145765   | 1258919   | 1108081   | 732986   | 836764    | 852844    | 870949    | 1051294  | 675115    |
| EIC     | Negative | 602.3469 | 4.33 | unknown | 88928706 | 108341821 | 83277891 | 93864055 | 109980137 | 126042556 | 125153093 | 103487644 | 99204798 | 92079987 | 106571907 | 111037316 | 110210115 | 95323913 | 106862189 | 110605837 | 120935029 | 93753580 | 106371504 |
| EIC     | Negative | 520.2323 | 0.89 | unknown | 51810    | 56504     | 54768    | 608      |           |           |           |           |          |          |           |           |           |          |           |           |           |          |           |



|         |          |          |      |         |          |           |          |          |           |           |          |          |           |          |          |          |          |          |          |          |          |          |          |
|---------|----------|----------|------|---------|----------|-----------|----------|----------|-----------|-----------|----------|----------|-----------|----------|----------|----------|----------|----------|----------|----------|----------|----------|----------|
| EIC     | Negative | 370.1592 | 2.11 | unknown | 1094857  | 800845    | 805091   | 1285042  | 1387322   | 1150012   | 1327201  | 968951   | 1407524   | 917265   | 957009   | 1084190  | 1065439  | 438828   | 1200538  | 1647736  | 866756   | 993983   | 395293   |
| fpHILIC | Positive | 146.0268 | 1.03 | unknown | 375937   | 3517176   | 1696518  | 1752012  | 3441121   | 3640029   | 5478687  | 2009130  | 3845618   | 1804840  | 3695265  | 2928015  | 4753615  | 2127038  | 2548747  | 2770600  | 3638161  | 2176939  | 2364707  |
| EIC     | Negative | 455.2875 | 5.23 | unknown | 396920   | 495894    | 374220   | 592029   | 588087    | 572767    | 457163   | 491858   | 686121    | 334144   | 427643   | 384079   | 361478   | 537291   | 385290   | 412037   | 506388   | 352559   | 405206   |
| EIC     | Negative | 415.1975 | 2.89 | unknown | 0        | 0         | 0        | 0        | 239197    | 177139    | 0        | 0        | 0         | 0        | 0        | 0        | 0        | 0        | 0        | 0        | 0        | 0        | 0        |
| EIC     | Negative | 320.9970 | 0.49 | unknown | 4733616  | 3809739   | 3886146  | 3976500  | 8398567   | 4424558   | 6692016  | 4830681  | 3634116   | 4966277  | 3803217  | 3016742  | 4016251  | 27384709 | 5515885  | 3359795  | 3629625  | 4100557  | 4268437  |
| fpHILIC | Negative | 196.0542 | 3.11 | unknown | 1324192  | 1133377   | 828906   | 1058113  | 1660901   | 2242641   | 1850733  | 936487   | 1832291   | 919031   | 1487761  | 1609063  | 1291601  | 1268338  | 1485683  | 1669594  | 1536924  | 811216   | 1142051  |
| EIC     | Negative | 443.2056 | 1.63 | unknown | 173618   | 212886    | 0        | 0        | 272661    | 830358    | 262480   | 0        | 322290    | 155698   | 251034   | 90554    | 337873   | 486786   | 268503   | 661718   | 115981   | 230385   | 268367   |
| EIC     | Negative | 526.2844 | 4.37 | unknown | 2659742  | 8166625   | 2207172  | 3986108  | 6328279   | 7185615   | 5597193  | 3652738  | 6663802   | 2431384  | 4228424  | 3877369  | 3862809  | 5354701  | 4660582  | 4754567  | 5293862  | 2575758  | 3813282  |
| EIC     | Negative | 365.2383 | 1.44 | unknown | 0        | 232635    | 0        | 0        | 404555    | 344561    | 319396   | 0        | 344240    | 0        | 238899   | 165527   | 410823   | 312074   | 473091   | 524164   | 205936   | 0        | 167764   |
| EIC     | Negative | 649.0093 | 0.48 | unknown | 5036310  | 3894609   | 4044930  | 4473738  | 7987371   | 4592730   | 6907966  | 5215624  | 3961649   | 5179914  | 3800988  | 3139792  | 4326680  | 10611934 | 5069045  | 3598414  | 4052668  | 4562260  | 4395955  |
| fpHILIC | Positive | 222.0787 | 3.71 | unknown | 269544   | 222558    | 153149   | 518493   | 384790    | 421525    | 341963   | 209106   | 1097047   | 245936   | 311454   | 345153   | 504965   | 355051   | 336252   | 609004   | 438355   | 354059   | 196688   |
| EIC     | Negative | 525.2818 | 4.37 | unknown | 12727054 | 32444282  | 11429691 | 20076195 | 33347350  | 36667705  | 28445022 | 19142019 | 34024119  | 12154491 | 22611950 | 20149233 | 19361871 | 28676850 | 23532987 | 24271693 | 27273141 | 13354632 | 19701748 |
| EIC     | Negative | 494.9585 | 0.47 | unknown | 260116   | 187766    | 241075   | 183880   | 426209    | 227652    | 289106   | 234167   | 183435    | 211667   | 184477   | 124903   | 170477   | 783760   | 205604   | 111257   | 204196   | 214419   | 218289   |
| EIC     | Negative | 535.2865 | 4.98 | unknown | 140016   | 167387    | 134712   | 163691   | 191250    | 171020    | 153419   | 169286   | 250278    | 127277   | 152624   | 156769   | 128351   | 190014   | 160582   | 145336   | 157027   | 140691   | 143413   |
| EIC     | Positive | 473.2184 | 2.64 | unknown | 236393   | 140277    | 0        | 93442    | 330987    | 263951    | 288340   | 103005   | 249299    | 144157   | 213268   | 180012   | 168980   | 327417   | 194424   | 265871   | 169049   | 162168   | 334078   |
| fpHILIC | Positive | 503.2950 | 0.50 | unknown | 169180   | 2222823   | 1267385  | 1238801  | 2458437   | 2520004   | 2303689  | 1647601  | 1787891   | 1013182  | 1734500  | 1904250  | 1625852  | 1975191  | 1960079  | 1254125  | 2382362  | 1153196  | 1452675  |
| EIC     | Negative | 311.1690 | 5.48 | unknown | 11399861 | 9491800   | 10649245 | 17346935 | 20057202  | 34548104  | 19936697 | 14758089 | 18791899  | 11846524 | 10555757 | 10896945 | 8047154  | 10981613 | 11435744 | 18635097 | 16470278 | 16943772 | 18023339 |
| EIC     | Negative | 568.0091 | 0.48 | unknown | 989478   | 768582    | 826579   | 902810   | 1659783   | 960761    | 1413898  | 1077643  | 760119    | 1046679  | 797578   | 599768   | 862872   | 2684463  | 1085089  | 609438   | 841197   | 928149   | 862623   |
| EIC     | Negative | 500.9785 | 0.49 | unknown | 316109   | 225444    | 172454   | 215139   | 1100065   | 338448    | 617238   | 362728   | 180606    | 411343   | 209823   | 118454   | 205190   | 11333609 | 446785   | 152239   | 196978   | 229875   | 268533   |
| EIC     | Negative | 542.3738 | 5.61 | unknown | 653195   | 875253    | 638694   | 798108   | 798705    | 867232    | 687307   | 676617   | 877475    | 639771   | 797080   | 728634   | 691410   | 685055   | 672752   | 626458   | 671386   | 603075   | 761452   |
| EIC     | Negative | 502.2846 | 4.46 | unknown | 3534810  | 5995362   | 3367633  | 3804632  | 6266185   | 7477712   | 5877047  | 4072281  | 4985928   | 3241271  | 4788391  | 4701069  | 3625904  | 6028193  | 5147115  | 4057467  | 5431902  | 3485990  | 4917880  |
| EIC     | Negative | 306.9825 | 0.55 | unknown | 0        | 69055     | 63792    | 95967    | 143220    | 54237     | 144468   | 184932   | 88179     | 91567    | 71764    | 73526    | 234759   | 79481    | 58114    | 94852    | 98929    | 0        | 0        |
| EIC     | Negative | 353.3072 | 6.65 | unknown | 180605   | 222534    | 270743   | 517089   | 368198    | 610868    | 438300   | 445193   | 399033    | 265539   | 277524   | 384841   | 438120   | 339870   | 299415   | 416933   | 369539   | 341039   | 241435   |
| EIC     | Negative | 649.3909 | 5.89 | unknown | 228407   | 314267    | 190074   | 217601   | 299041    | 370538    | 303575   | 215780   | 353335    | 186077   | 304314   | 262971   | 286733   | 237097   | 290799   | 282154   | 267787   | 174262   | 310696   |
| fpHILIC | Positive | 414.1385 | 3.11 | unknown | 796088   | 835811    | 817454   | 955561   | 949469    | 877651    | 1030511  | 1047530  | 250006    | 858190   | 1036869  | 1024746  | 858508   | 642651   | 958837   | 860444   | 719800   | 876663   | 591395   |
| fpHILIC | Positive | 205.1263 | 2.32 | unknown | 24324086 | 27911430  | 31926762 | 50164962 | 28999138  | 36491964  | 37189420 | 31323462 | 61243800  | 28790964 | 38534020 | 38805920 | 42880560 | 16208464 | 20023408 | 15288516 | 25479196 | 33909488 | 22722120 |
| EIC     | Negative | 393.2653 | 1.66 | unknown | 392350   | 253210    | 0        | 0        | 383160    | 778099    | 811298   | 234369   | 285406    | 0        | 24612    | 12757    | 20648    | 7603     | 35685    | 27587    | 20343    | 101693   | 31699    |
| fpHILIC | Negative | 361.2026 | 0.47 | unknown | 412751   | 380293    | 450626   | 181503   | 547290    | 1297929   | 393108   | 461634   | 469305    | 267517   | 358917   | 72649    | 427100   | 527246   | 224327   | 728832   | 212512   | 595105   | 394337   |
| fpHILIC | Positive | 432.2375 | 0.41 | unknown | 33501580 | 36296516  | 31011192 | 38184436 | 49437532  | 40011400  | 3707952  | 36385024 | 47517988  | 40068324 | 32112678 | 36757996 | 41053968 | 33884696 | 23296266 | 30581062 | 32750244 | 41050500 | 25641078 |
| EIC     | Negative | 281.1738 | 5.18 | unknown | 1656099  | 1657657   | 2331547  | 2873324  | 2176252   | 2067704   | 2302244  | 2332535  | 2888522   | 1594748  | 1779625  | 1805688  | 2167425  | 1632844  | 1572558  | 1705674  | 1807066  | 2503997  | 1683306  |
| EIC     | Negative | 524.2786 | 4.37 | unknown | 41230109 | 105453348 | 37090907 | 64944913 | 108409312 | 118480387 | 93356993 | 61960846 | 110825963 | 39833373 | 74947054 | 66365034 | 63293849 | 92057818 | 78634118 | 78773167 | 88513012 | 43910551 | 64451733 |
| fpHILIC | Negative | 306.0764 | 3.63 | unknown | 311887   | 325143    | 260819   | 422260   | 732629    | 1350575   | 890221   | 394312   | 413256    | 350090   | 473434   | 814350   | 646231   | 413465   | 443038   | 558663   | 833212   | 690719   | 671656   |
| EIC     | Negative | 530.4295 | 6.63 | unknown | 2379366  | 1328149   | 1332752  | 1697122  | 2498690   | 1366549   | 3418928  | 3190487  | 2035619   | 2168784  | 1641394  | 1709307  | 1200198  | 1799772  | 2699064  | 3230665  | 1841166  | 1140078  | 2779975  |
| EIC     | Negative | 413.2464 | 3.01 | unknown | 157013   | 90198     | 169232   | 34816    | 389729    | 41762     | 298662   | 275578   | 47042     | 21666    | 0        | 13568    | 15843    | 0        | 11689    | 0        | 45490    | 0        | 0        |
| EIC     | Negative | 425.2561 | 1.11 | unknown | 207794   | 241030    | 237340   | 466048   | 877579    | 560578    | 579841   | 482110   | 316606    | 314401   | 351163   | 139017   | 541446   | 304537   | 648048   | 658204   | 419408   | 641309   | 320019   |
| EIC     | Negative | 564.3668 | 5.84 | unknown | 269085   | 335547    | 250111   | 297203   | 353892    | 407803    | 331374   | 275419   | 365626    | 185417   | 335776   | 253362   | 248261   | 219153   | 274097   | 287523   | 264291   | 205855   | 258111   |
| EIC     | Negative | 312.1722 | 5.48 | unknown | 2311927  | 1826693   | 2165265  | 3420252  | 3898933   | 6838911   | 3936300  | 2923457  | 3743519   | 2232447  | 2073078  | 2117527  | 1592631  | 2202052  | 2258732  | 3611049  | 3205863  | 3264612  | 3466652  |
| EIC     | Negative | 356.2472 | 2.15 | unknown | 2123656  | 2700530   | 2403076  | 2635146  | 2666252   | 2750882   | 2431550  | 6243788  | 2693285   | 2557101  | 2877783  | 2586492  | 2673806  | 2537000  | 2634774  | 2677749  | 2380722  | 2736500  | 0        |
| EIC     | Negative | 241.1808 | 3.87 | unknown | 740358   | 999176    | 1345225  | 7062012  | 2700491   | 1431021   | 2579788  | 2815313  | 2649341   | 2366213  | 1304831  | 2248111  | 2761230  | 485112   | 471378   | 2677645  | 1648882  | 3387283  | 565023   |
| EIC     | Negative | 388.9040 | 0.55 | unknown | 16886    | 82795     | 63797    | 118535   | 174009    | 167685    | 278943   | 93567    | 53867     | 90259    | 74979    | 104566   | 247641   | 107185   | 54284    | 114421   | 125353   | 49239    | 0        |
| fpHILIC | Positive | 236.0717 | 3.14 | unknown | 1037307  | 1127721   | 1149903  | 982140   | 1285725   | 1130042   | 1127469  | 1238332  | 1119095   | 1119947  | 1094063  | 1286208  | 1245829  | 1172961  | 1146233  | 1047461  | 1195596  | 1195596  | 0        |
| fpHILIC | Negative | 401.1996 | 0.35 | unknown | 204132   | 325123    | 358128   | 584887   | 1024468   | 714773    | 657451   | 531142   | 669602    | 650007   | 602618   | 987566   | 383339   | 634365   | 424213   | 441872   | 860037   | 316042   | 556611   |
| EIC     | Negative | 426.2597 | 1.11 | unknown | 59903    | 60318     | 61216    | 116705   | 224160    | 139470    | 144769   | 119470   | 81225     | 163705   | 93735    | 45825    | 146863   | 85650    | 154832   | 117958   | 104442   | 156381   | 85653    |
| fpHILIC | Negative | 375.1144 | 3.12 | unknown | 445010   | 311651    | 230691   | 294158   | 466802    | 618123    | 486539   | 282270   | 596417    | 301900   | 405433   | 508577   | 320079   | 324955   | 411429   | 475722   | 413228   | 198440   | 314866   |
| EIC     | Negative | 501.2819 | 4.46 | unknown | 18384070 | 32084121  | 17749572 | 20499614 | 33415594  | 38856194  | 31735745 | 21797471 | 26429737  | 17006889 | 24909689 | 23429952 | 19652651 | 30196366 | 27732639 | 21271783 | 29125493 | 18390573 | 26333345 |
| EIC     | Negative | 313.1668 | 5.48 | unknown | 608327   | 511560    | 596685   | 944864   | 1049779   | 1852346   | 1063056  | 770282   | 1011693   | 637395   | 543630   | 587741   | 442921   | 622274   | 613934   | 1005034  | 894086   | 884581   | 957232   |
| EIC     | Negative | 480.2021 | 0.70 | unknown | 77225    | 97547     | 101512   | 97123    | 90369     | 84053     | 155659   | 135244   | 114459    | 101074   | 143952   | 92825    | 61417    | 55297    | 89572    | 103373   | 106609   | 62555    | 61676    |
| EIC     | Negative | 312.1722 | 5.29 | unknown | 3536203  | 3244222   | 3438527  | 6724480  | 7750916   | 17411070  | 8422861  | 5853145  | 7         |          |          |          |          |          |          |          |          |          |          |

|         |          |          |      |         |           |           |           |           |           |           |           |           |           |           |           |           |           |           |           |           |           |           |           |
|---------|----------|----------|------|---------|-----------|-----------|-----------|-----------|-----------|-----------|-----------|-----------|-----------|-----------|-----------|-----------|-----------|-----------|-----------|-----------|-----------|-----------|-----------|
| fpHILIC | Positive | 524.3714 | 0.55 | unknown | 149534192 | 195521696 | 162359776 | 181950000 | 223913008 | 243475072 | 204715216 | 190427968 | 162722656 | 188444192 | 184146528 | 218472624 | 212826496 | 192437216 | 208379152 | 179028048 | 217347568 | 203409312 | 194948544 |
| fpHILIC | Negative | 207.0137 | 0.49 | unknown | 909668    | 2123044   | 1832319   | 4473416   | 4423875   | 3657822   | 3734070   | 3065500   | 4756280   | 4887753   | 2858153   | 5938354   | 1480988   | 3479010   | 1513421   | 1751661   | 3768916   | 1887931   | 4127364   |
| EIC     | Negative | 638.2853 | 3.73 | unknown | 17428     | 108168    | 54751     | 60426     | 129633    | 101883    | 113852    | 85841     | 242094    | 60078     | 118505    | 69618     | 144575    | 221723    | 104444    | 211121    | 159806    | 68873     | 109658    |
| EIC     | Negative | 336.2624 | 1.95 | unknown | 0         | 62607     | 0         | 0         | 87476     | 135974    | 128264    | 0         | 283337    | 0         | 0         | 0         | 14989     | 16347     | 17572     | 33683     | 17661     | 0         | 20597     |
| EIC     | Negative | 337.2051 | 6.42 | unknown | 6404301   | 4638684   | 4121401   | 4806718   | 11924909  | 3641673   | 12198550  | 6360689   | 6316986   | 4638766   | 4825518   | 2087454   | 5465609   | 3026057   | 2333023   | 4315623   | 1080274   | 8129798   | 4985256   |
| EIC     | Negative | 492.3420 | 3.59 | unknown | 172055    | 157429    | 294382    | 98439     | 358789    | 86536     | 348464    | 504589    | 240743    | 51514     | 78241     | 128112    | 68111     | 258748    | 143448    | 124169    | 169990    | 146606    | 142596    |
| EIC     | Negative | 335.2232 | 1.95 | unknown | 0         | 289635    | 0         | 0         | 293014    | 571553    | 585455    | 0         | 1263755   | 0         | 113029    | 108538    | 65887     | 135590    | 77527     | 158390    | 86741     | 0         | 78869     |
| EIC     | Negative | 556.3526 | 5.09 | unknown | 13075369  | 13362885  | 12845200  | 13041709  | 13142451  | 13395571  | 13511564  | 13763957  | 13728679  | 12662217  | 14191777  | 13453088  | 12496695  | 14770850  | 13616654  | 13634195  | 13034472  | 12882681  | 13656200  |
| EIC     | Negative | 459.2731 | 2.27 | unknown | 350311    | 228676    | 338722    | 188584    | 752225    | 204903    | 594850    | 153750    | 193905    | 153750    | 159656    | 29927     | 33929     | 14927     | 45068     | 42667     | 29179     | 221579    | 141954    |
| EIC     | Negative | 307.1561 | 3.00 | unknown | 923155    | 699707    | 838462    | 612009    | 833779    | 945425    | 926468    | 891744    | 705166    | 740237    | 209569    | 704001    | 202609    | 0         | 716918    | 247136    | 0         | 0         | 422896    |
| EIC     | Negative | 458.1687 | 0.69 | unknown | 76494     | 55936     | 51986     | 27691     | 65773     | 80202     | 59887     | 161483    | 65075     | 85912     | 23257     | 126419    | 109422    | 46010     | 64427     | 62935     | 94061     | 79932     | 90825     |
| EIC     | Negative | 242.1841 | 3.87 | unknown | 114516    | 167488    | 207846    | 1080636   | 393766    | 224329    | 428544    | 431194    | 1033071   | 361551    | 199692    | 339245    | 437245    | 77350     | 88308     | 409662    | 255027    | 542213    | 91007     |
| EIC     | Negative | 346.1591 | 2.02 | unknown | 1182670   | 1286640   | 567859    | 854595    | 2113953   | 1948228   | 2000421   | 869332    | 2167183   | 510333    | 1486482   | 1740793   | 1447561   | 691865    | 1908395   | 2363239   | 1335157   | 297939    | 712997    |
| fpHILIC | Positive | 766.5734 | 0.43 | unknown | 774581    | 832976    | 936399    | 625556    | 1067608   | 949687    | 831582    | 1388805   | 868587    | 669337    | 791951    | 622468    | 662335    | 844928    | 796391    | 878471    | 728483    | 1055914   | 943004    |
| fpHILIC | Positive | 175.1070 | 3.04 | unknown | 1064657   | 541892    | 628366    | 688283    | 1322931   | 2652286   | 872706    | 593647    | 1398650   | 367179    | 364363    | 383409    | 403416    | 512928    | 835241    | 1216834   | 549037    | 1690448   | 575133    |
| EIC     | Negative | 438.2491 | 2.06 | unknown | 72475     | 329956    | 0         | 0         | 354490    | 335539    | 357594    | 204461    | 355590    | 75726     | 288648    | 378870    | 262494    | 303510    | 303510    | 240534    | 300441    | 128245    | 325267    |
| fpHILIC | Positive | 174.1125 | 2.06 | unknown | 423826    | 688743    | 386976    | 512288    | 839043    | 765621    | 696842    | 587376    | 485555    | 494518    | 627813    | 656061    | 567324    | 715432    | 470111    | 495922    | 665165    | 403246    | 660642    |
| EIC     | Negative | 543.2963 | 6.12 | unknown | 4445392   | 4853533   | 4020551   | 4299446   | 4797397   | 4771168   | 4939279   | 4400985   | 4388710   | 4119988   | 4478675   | 4861135   | 4636863   | 4557878   | 3972734   | 4914352   | 4504373   | 4782952   | 5277198   |
| EIC     | Negative | 453.2821 | 4.98 | unknown | 3151125   | 4720736   | 3043823   | 3908579   | 4436783   | 4896485   | 3547418   | 3427585   | 5162858   | 2683319   | 3188973   | 3459998   | 2807245   | 4659546   | 3150931   | 2833784   | 3512875   | 2751539   | 3496518   |
| EIC     | Negative | 592.3282 | 3.24 | unknown | 472819    | 828663    | 325450    | 592275    | 963107    | 1198268   | 623164    | 1894589   | 308070    | 722637    | 1279574   | 815355    | 866694    | 971273    | 971273    | 994939    | 751112    | 438261    | 721165    |
| fpHILIC | Negative | 257.2393 | 0.38 | unknown | 3901992   | 6310427   | 7302804   | 9706385   | 6593283   | 6394289   | 7325652   | 7916905   | 10490113  | 5242444   | 5078171   | 6458009   | 6857800   | 4754760   | 4428446   | 6241790   | 5953568   | 6274052   | 5630088   |
| EIC     | Negative | 354.1752 | 3.46 | unknown | 92127     | 135833    | 70547     | 264150    | 220932    | 134497    | 239260    | 134497    | 239260    | 168344    | 99541     | 665215    | 62873     | 92386     | 353886    | 165322    | 132782    | 92150     | 121509    |
| EIC     | Negative | 318.1098 | 1.96 | unknown | 0         | 224893    | 0         | 0         | 675766    | 674661    | 414506    | 0         | 213790    | 0         | 265449    | 73680     | 77136     | 56062     | 202124    | 196318    | 74985     | 0         | 44860     |
| EIC     | Negative | 561.4788 | 6.88 | unknown | 0         | 0         | 444602    | 0         | 773888    | 485384    | 0         | 577826    | 521452    | 0         | 0         | 0         | 0         | 0         | 0         | 459954    | 438268    | 0         | 0         |
| EIC     | Negative | 595.4957 | 6.59 | unknown | 393357    | 403765    | 345392    | 421272    | 494199    | 381054    | 679385    | 528158    | 874476    | 405494    | 492037    | 317095    | 415891    | 492562    | 485110    | 635376    | 454643    | 348441    | 596648    |
| EIC     | Negative | 487.0023 | 0.49 | unknown | 725809    | 524371    | 585221    | 629382    | 1141479   | 632451    | 963247    | 692348    | 521472    | 707811    | 528641    | 421527    | 507379    | 2402985   | 721448    | 487072    | 575210    | 569536    | 609682    |
| EIC     | Negative | 409.2610 | 1.77 | unknown | 68393     | 46752     | 371723    | 113268    | 306554    | 484058    | 230869    | 673818    | 154275    | 41768     | 259696    | 226660    | 324130    | 301661    | 187560    | 324934    | 219391    | 0         | 215147    |
| fpHILIC | Negative | 142.0509 | 1.05 | unknown | 230363    | 106040    | 200109    | 1679591   | 481091    | 482007    | 448447    | 370984    | 1528634   | 536700    | 320735    | 331804    | 560086    | 96996     | 119141    | 698217    | 219705    | 270988    | 86719     |
| EIC     | Negative | 255.0664 | 1.82 | unknown | 0         | 8405      | 14418     | 0         | 239193    | 0         | 324944    | 28254     | 207821    | 0         | 53352     | 59061     | 63776     | 61048     | 0         | 189151    | 246760    | 0         | 211983    |
| fpHILIC | Negative | 126.0391 | 1.03 | unknown | 1293124   | 1055995   | 920054    | 1370583   | 1180503   | 1424354   | 1319440   | 1037206   | 1405818   | 1190847   | 961513    | 992098    | 1165230   | 892272    | 835594    | 1171862   | 1046361   | 903161    | 706408    |
| fpHILIC | Negative | 525.2823 | 0.50 | unknown | 1319827   | 2901201   | 775166    | 1216648   | 3375705   | 3274367   | 3109190   | 1175318   | 3606417   | 744433    | 2087454   | 2223711   | 2028837   | 2262249   | 2538161   | 2064342   | 2564800   | 774906    | 1978745   |
| EIC     | Negative | 423.2393 | 1.44 | unknown | 0         | 144648    | 0         | 0         | 411156    | 318442    | 272130    | 0         | 93785     | 0         | 155335    | 28354     | 267399    | 159257    | 232987    | 237014    | 182720    | 0         | 159931    |
| EIC     | Negative | 379.2475 | 1.65 | unknown | 85482     | 66080     | 0         | 0         | 168916    | 111027    | 279458    | 0         | 206206    | 0         | 10592     | 13448     | 10479     | 18562     | 20448     | 26611     | 15306     | 0         | 20427     |
| EIC     | Negative | 515.2436 | 1.03 | unknown | 234581    | 435253    | 220444    | 0         | 276313    | 420338    | 610128    | 476225    | 311162    | 331371    | 393335    | 550431    | 435398    | 421871    | 308947    | 299545    | 365581    | 337178    | 528341    |
| fpHILIC | Negative | 233.9844 | 0.98 | unknown | 2605982   | 2633926   | 1246123   | 1403593   | 3902001   | 3682260   | 2831574   | 1861567   | 2320615   | 0         | 0         | 32626     | 0         | 0         | 0         | 48991     | 0         | 0         | 35018     |
| EIC     | Negative | 319.2273 | 3.12 | unknown | 102277    | 113718    | 564508    | 125345    | 244165    | 207397    | 436432    | 751359    | 624288    | 95009     | 129919    | 82415     | 121211    | 347640    | 175150    | 309093    | 127909    | 447238    | 121530    |
| EIC     | Negative | 570.3686 | 5.76 | unknown | 2023489   | 3029713   | 1981237   | 2058558   | 2813254   | 3253256   | 2671543   | 2435884   | 2273243   | 1767875   | 2535766   | 2537063   | 2483249   | 2535213   | 2530108   | 2428751   | 2599533   | 1943074   | 2574635   |
| EIC     | Negative | 413.1944 | 3.35 | unknown | 0         | 0         | 0         | 0         | 747179    | 779240    | 1388322   | 188946    | 848337    | 0         | 2169299   | 0         | 0         | 1029191   | 0         | 0         | 0         | 1855019   | 0         |
| EIC     | Negative | 527.2865 | 4.38 | unknown | 356854    | 971311    | 365160    | 542412    | 968073    | 1056639   | 817708    | 577314    | 0         | 389638    | 671513    | 750085    | 510922    | 886395    | 698569    | 699133    | 756237    | 451934    | 519105    |
| EIC     | Negative | 339.1453 | 1.47 | unknown | 0         | 31380     | 0         | 0         | 83672     | 77902     | 66390     | 0         | 76768     | 0         | 41207     | 32561     | 17680     | 63250     | 67600     | 63888     | 45758     | 0         | 86591     |
| EIC     | Negative | 452.2790 | 4.98 | unknown | 13206764  | 19482518  | 12735922  | 16421329  | 18425810  | 20355324  | 15396755  | 14374611  | 21391489  | 11221015  | 13583142  | 14293331  | 11499112  | 19484311  | 12852157  | 11597264  | 14923598  | 11363505  | 14276414  |
| EIC     | Negative | 536.4780 | 6.53 | unknown | 304875    | 414553    | 575926    | 730877    | 507913    | 366914    | 603693    | 662410    | 811547    | 680441    | 628983    | 567426    | 1124916   | 664677    | 405701    | 701630    | 686525    | 630026    | 418160    |
| EIC     | Negative | 595.3459 | 3.60 | unknown | 145230    | 255309    | 140492    | 174978    | 287821    | 256444    | 296772    | 231511    | 563098    | 160992    | 238622    | 257299    | 229096    | 308554    | 251275    | 288828    | 239775    | 161162    | 212001    |
| EIC     | Negative | 504.3067 | 4.93 | unknown | 213019    | 419517    | 273843    | 133259    | 424041    | 492158    | 360090    | 728267    | 281257    | 172071    | 317092    | 209588    | 285849    | 408626    | 340263    | 184767    | 332676    | 243278    | 342436    |
| EIC     | Negative | 310.0651 | 1.56 | unknown | 64417     | 109019    | 0         | 0         | 132236    | 142445    | 132075    | 72594     | 0         | 125200    | 0         | 97679     | 88003     | 136291    | 153609    | 74256     | 106628    | 0         | 132621    |
| EIC     | Negative | 246.1137 | 2.13 | unknown | 0         | 0         | 0         | 0         | 302891    | 333258    | 24717     | 0         | 0         | 0         | 25554     | 12945     | 45244     | 0         | 10521     | 6985      | 0         | 82624     |           |
| EIC     | Negative | 300.1606 | 2.09 | unknown | 228227    | 175526    | 211907    | 204604    | 248429    | 203711    | 227687    | 307129    | 189242    | 137372    | 123125    | 138692    | 147945    | 153389    | 145177    | 201672    | 187641    | 234202    | 132033    |
| EIC     | Negative | 366.2372 | 1.86 | unknown | 251800    | 221089    | 0         | 0         | 548908    | 419455    | 318860    | 0         | 231136    | 0         | 305448    | 154048    | 424681    | 252149    | 423221    | 485700    | 237742    | 0         | 174417    |
| fpHILIC | Positive | 904.5886 | 0.37 | unknown | 2150223   | 2190362   | 1956724   | 2623361   | 2800214   | 2019882   | 2035265   | 2475884   | 2961497   | 3058277   | 2584756   | 2156465   | 2408391   | 2218260   | 2216062   | 2361685   | 2515551   | 2204234   | 2733388   |
| EIC     | Negative | 336.9715 | 0.49 | unknown | 77653     | 49166     | 0         | 55719     | 375392    | 78319     | 154457    | 78590     | 39806     | 73745     | 46836     | 0</       |           |           |           |           |           |           |           |

|         |          |          |      |         |          |          |          |           |          |          |          |           |           |          |          |          |          |          |          |          |          |          |          |
|---------|----------|----------|------|---------|----------|----------|----------|-----------|----------|----------|----------|-----------|-----------|----------|----------|----------|----------|----------|----------|----------|----------|----------|----------|
| fpHILIC | Positive | 144.1016 | 2.10 | unknown | 866735   | 643038   | 778540   | 565869    | 1859341  | 3366187  | 8279463  | 1050442   | 1177826   | 381451   | 455987   | 520080   | 773139   | 621883   | 463347   | 598920   | 1077104  | 1275684  | 519865   |
| fpHILIC | Positive | 144.1016 | 3.00 | unknown | 1655641  | 1773822  | 1104174  | 1600947   | 1789661  | 2426004  | 1751238  | 1420567   | 4512995   | 1076385  | 1514348  | 1611948  | 1615705  | 1164045  | 1091435  | 2220345  | 1441565  | 1062186  | 998014   |
| fpHILIC | Negative | 325.1842 | 0.35 | unknown | 10890265 | 20989900 | 25090110 | 39847396  | 63849424 | 60168364 | 40264660 | 32495958  | 43473452  | 42945208 | 37887652 | 61419744 | 20582350 | 43088256 | 25569990 | 27849688 | 47561652 | 22909424 | 32511324 |
| fpHILIC | Negative | 253.2171 | 0.38 | unknown | 28209720 | 47890892 | 92818904 | 139741312 | 86220272 | 65544596 | 90715776 | 111944384 | 143237024 | 55477444 | 38575316 | 59299696 | 95214960 | 29340732 | 31988336 | 70352568 | 71100120 | 74723824 | 38948352 |
| fpHILIC | Negative | 236.1876 | 0.35 | unknown | 2145656  | 4216097  | 5203436  | 8304714   | 12401732 | 12094673 | 7713679  | 6784144   | 9038379   | 8930438  | 7818347  | 12306834 | 4082622  | 8746384  | 5429261  | 5766744  | 9100402  | 4627466  | 6653352  |
| EIC     | Negative | 567.3864 | 5.89 | unknown | 2388359  | 3745179  | 2506985  | 2824560   | 3899423  | 4666247  | 3564306  | 2514849   | 3812336   | 2171152  | 3849470  | 3364189  | 3140128  | 2680357  | 3363116  | 3176394  | 2927955  | 2008803  | 3447187  |
| EIC     | Negative | 320.2311 | 3.11 | unknown | 20968    | 13642    | 135334   | 19446     | 50433    | 53541    | 89260    | 177632    | 122366    | 20232    | 324403   | 13347    | 34815    | 81077    | 45932    | 71938    | 33292    | 109995   | 31460    |
| EIC     | Negative | 600.2598 | 2.20 | unknown | 117207   | 148005   | 64149    | 172265    | 187209   | 180523   | 309650   | 160862    | 262649    | 390327   | 242924   | 148444   | 76148    | 128928   | 158997   | 161942   | 208624   | 179581   | 153049   |
| fpHILIC | Positive | 834.5991 | 0.43 | unknown | 7814408  | 14662769 | 7801957  | 9153496   | 15125794 | 13061650 | 11838332 | 10090936  | 14692669  | 8942419  | 12756032 | 11330644 | 11450972 | 12765594 | 10793742 | 15092683 | 15276289 | 9668831  | 12391036 |
| EIC     | Negative | 527.4474 | 6.98 | unknown | 2365644  | 1813124  | 605879   | 808235    | 958765   | 4391109  | 1768550  | 3913740   | 1877842   | 1071612  | 993140   | 1812370  | 948627   | 1352868  | 644623   | 1138913  | 959692   | 670233   | 1602740  |
| EIC     | Negative | 281.0218 | 1.19 | unknown | 54882    | 47329    | 43186    | 48495     | 64508    | 61416    | 68573    | 44007     | 50177     | 51898    | 57537    | 53621    | 52442    | 119421   | 58814    | 46572    | 51197    | 42502    | 60031    |
| EIC     | Negative | 364.2216 | 1.89 | unknown | 0        | 81539    | 0        | 0         | 142909   | 438405   | 140548   | 0         | 145951    | 0        | 140208   | 158605   | 163416   | 96048    | 156612   | 261225   | 130606   | 0        | 80706    |
| EIC     | Negative | 228.0412 | 1.72 | unknown | 8749     | 87054    | 0        | 0         | 101681   | 72268    | 157919   | 36419     | 98345     | 12457    | 119188   | 124008   | 135939   | 101427   | 46976    | 142840   | 69501    | 0        | 64937    |
| fpHILIC | Positive | 417.2171 | 0.41 | unknown | 656116   | 639080   | 527841   | 642451    | 1085620  | 901873   | 871334   | 850683    | 2067090   | 672943   | 728317   | 710917   | 836610   | 777015   | 393495   | 642966   | 618158   | 781105   | 510426   |
| fpHILIC | Negative | 311.1685 | 0.35 | unknown | 11229351 | 21398570 | 23812776 | 41248672  | 60364592 | 61647952 | 39688244 | 33075618  | 42592540  | 42220156 | 37972248 | 61027464 | 19841994 | 42212736 | 24205786 | 25884614 | 50726496 | 23443148 | 31055502 |
| EIC     | Negative | 429.3014 | 3.73 | unknown | 0        | 0        | 0        | 0         | 0        | 344517   | 334375   | 0         | 0         | 423492   | 0        | 127232   | 0        | 0        | 0        | 0        | 0        | 0        | 213377   |
| EIC     | Negative | 361.2024 | 5.18 | unknown | 0        | 0        | 0        | 0         | 1281453  | 1321320  | 0        | 0         | 0         | 0        | 0        | 1321367  | 0        | 1398971  | 0        | 0        | 0        | 0        | 0        |
| EIC     | Negative | 525.4891 | 6.58 | unknown | 131776   | 166619   | 47952    | 171627    | 162610   | 126387   | 263032   | 192500    | 449189    | 135711   | 185584   | 107703   | 310044   | 110093   | 268720   | 240465   | 163934   | 295374   | 0        |
| EIC     | Negative | 528.4509 | 6.98 | unknown | 902692   | 699613   | 236326   | 305176    | 354901   | 1685273  | 676126   | 1515983   | 721573    | 399283   | 381102   | 679172   | 360209   | 513800   | 245452   | 439871   | 380234   | 251464   | 628872   |
| EIC     | Negative | 501.2819 | 1.98 | unknown | 0        | 0        | 0        | 0         | 0        | 311374   | 291745   | 0         | 0         | 0        | 374826   | 0        | 0        | 0        | 0        | 0        | 0        | 0        | 0        |
| EIC     | Negative | 375.2483 | 3.14 | unknown | 0        | 0        | 0        | 0         | 0        | 27710    | 0        | 5579766   | 6583254   | 0        | 37643    | 143205   | 162194   | 36795    | 51636    | 58918    | 81060    | 75116    | 0        |
| EIC     | Negative | 527.2869 | 4.54 | unknown | 924317   | 1717597  | 795017   | 1300530   | 1703015  | 1794756  | 1748650  | 1111631   | 1803140   | 832348   | 1181527  | 1389857  | 1206116  | 1490787  | 1445704  | 1801402  | 1376220  | 1011481  | 1294984  |
| EIC     | Negative | 390.2942 | 6.43 | unknown | 8665932  | 7770323  | 7556979  | 10608422  | 10163407 | 10703957 | 8726439  | 8342089   | 10915191  | 10362621 | 6926441  | 7611077  | 8023737  | 10125748 | 9267149  | 8349749  | 7824517  | 7171495  | 12353582 |
| EIC     | Negative | 365.2337 | 5.83 | unknown | 0        | 0        | 0        | 0         | 0        | 754170   | 0        | 0         | 643816    | 0        | 0        | 0        | 0        | 0        | 0        | 0        | 0        | 0        | 0        |
| EIC     | Negative | 438.2983 | 5.76 | unknown | 668850   | 979506   | 660183   | 731288    | 997790   | 1148421  | 721194   | 727791    | 1088617   | 607989   | 770121   | 946092   | 695714   | 964359   | 773275   | 787286   | 859135   | 631573   | 897081   |
| EIC     | Negative | 295.1544 | 3.00 | unknown | 295365   | 291820   | 276697   | 293367    | 306286   | 288855   | 345261   | 338011    | 286433    | 271627   | 264210   | 272690   | 293199   | 252098   | 261001   | 288572   | 308244   | 331647   | 308761   |
| EIC     | Negative | 258.1137 | 2.12 | unknown | 0        | 0        | 0        | 0         | 9383     | 0        | 669527   | 1177060   | 46239     | 0        | 0        | 24710    | 33126    | 42594    | 5143     | 6070     | 7505     | 0        | 125745   |
| fpHILIC | Negative | 103.0038 | 3.85 | unknown | 862316   | 774458   | 644634   | 1490553   | 895848   | 1169112  | 2547152  | 668436    | 2199545   | 730136   | 653999   | 727804   | 723961   | 676704   | 607569   | 1561161  | 605315   | 829671   | 802938   |
| EIC     | Negative | 265.0484 | 1.19 | unknown | 3583527  | 3858131  | 3294645  | 3175797   | 3835220  | 4465336  | 4525391  | 3933399   | 3845506   | 3705512  | 4196476  | 4197813  | 3738877  | 4150466  | 4057655  | 3642225  | 4223870  | 2893797  | 4326639  |
| EIC     | Negative | 256.1927 | 2.20 | unknown | 186771   | 207680   | 74062    | 234859    | 250479   | 264415   | 236404   | 244856    | 278333    | 198339   | 182687   | 260827   | 1783439  | 180471   | 3012097  | 196357   | 258279   | 224237   | 0        |
| EIC     | Negative | 372.3122 | 6.35 | unknown | 1086028  | 1339834  | 743364   | 740661    | 1194010  | 1143056  | 1131656  | 1316737   | 933699    | 593400   | 897331   | 769754   | 834176   | 859076   | 903933   | 672104   | 931591   | 860178   | 1156907  |
| EIC     | Negative | 345.1560 | 2.02 | unknown | 6496006  | 7221511  | 3345364  | 3882695   | 11763705 | 11008357 | 11093533 | 3919908   | 11773897  | 3180342  | 8422583  | 9663647  | 7445208  | 4322179  | 10587979 | 12852656 | 7544275  | 2007953  | 3959398  |
| EIC     | Negative | 526.2845 | 4.54 | unknown | 6397483  | 12192401 | 5487845  | 7813658   | 12062564 | 11958100 | 10791407 | 7974443   | 12295288  | 5940202  | 9237278  | 8224097  | 8607026  | 10342967 | 8694065  | 7283664  | 9612543  | 6287783  | 8859122  |
| EIC     | Negative | 368.1431 | 1.78 | unknown | 62074    | 44474    | 64995    | 0         | 64600    | 67853    | 63713    | 63235     | 57559     | 81080    | 50770    | 63681    | 53967    | 28218    | 63915    | 78513    | 53630    | 0        | 34802    |
| EIC     | Negative | 243.1965 | 3.43 | unknown | 1155120  | 794911   | 2597578  | 2403120   | 2481387  | 1628154  | 2064941  | 3369180   | 2448902   | 1505097  | 880080   | 1319830  | 1105351  | 673591   | 322862   | 884523   | 1109173  | 1737549  | 0        |
| EIC     | Negative | 356.2518 | 2.35 | unknown | 796470   | 1062847  | 930588   | 921887    | 1006651  | 1038126  | 1153077  | 977998    | 1029521   | 996668   | 1058028  | 1008002  | 1055780  | 856213   | 850739   | 1033011  | 1017018  | 881748   | 1157726  |
| EIC     | Negative | 266.0518 | 1.19 | unknown | 568327   | 593013   | 506152   | 480953    | 589196   | 700595   | 703868   | 509792    | 608691    | 569076   | 655712   | 640904   | 567868   | 636669   | 613338   | 568545   | 632743   | 447709   | 660028   |
| EIC     | Negative | 423.2762 | 1.97 | unknown | 0        | 112395   | 0        | 0         | 248941   | 237281   | 383723   | 0         | 308452    | 0        | 0        | 0        | 0        | 0        | 0        | 0        | 0        | 0        | 12050    |
| fpHILIC | Positive | 526.2928 | 0.50 | unknown | 3102482  | 6834279  | 2165262  | 3558148   | 6593205  | 6604423  | 6585852  | 3663643   | 2602180   | 4736509  | 4906140  | 4672911  | 5893375  | 4285418  | 46523471 | 6200251  | 2094555  | 4045648  | 0        |
| EIC     | Negative | 569.3659 | 5.76 | unknown | 9812948  | 14501108 | 9616552  | 10223184  | 13807365 | 16068931 | 12938095 | 11848191  | 11088371  | 8656153  | 12405391 | 12913050 | 12040072 | 12767551 | 12182862 | 11660641 | 12764583 | 9296263  | 12573793 |
| EIC     | Negative | 369.1558 | 2.11 | unknown | 5309901  | 3936425  | 3794018  | 6435860   | 6848214  | 5661137  | 6586625  | 4497074   | 6824088   | 4326506  | 4755458  | 5379787  | 5191014  | 2178799  | 6014019  | 3796649  | 4385874  | 4351308  | 1988238  |
| EIC     | Negative | 618.3423 | 3.74 | unknown | 129015   | 190479   | 126263   | 132636    | 187705   | 219163   | 210576   | 161655    | 243823    | 94502    | 178177   | 247234   | 207030   | 211102   | 178090   | 219011   | 195695   | 135494   | 185961   |
| fpHILIC | Negative | 255.0630 | 0.43 | unknown | 0        | 0        | 0        | 0         | 0        | 833109   | 1128043  | 0         | 0         | 514015   | 41287    | 903310   | 61570    | 69142    | 0        | 0        | 0        | 0        | 107696   |
| EIC     | Negative | 498.2628 | 3.82 | unknown | 0        | 1909982  | 0        | 847227    | 1662632  | 1352867  | 1103474  | 806850    | 3367152   | 539669   | 875380   | 505095   | 822072   | 2379016  | 1036989  | 1153171  | 1354630  | 656355   | 864475   |
| EIC     | Negative | 648.3869 | 5.89 | unknown | 675287   | 987542   | 689528   | 784845    | 1006947  | 1194639  | 973240   | 672504    | 1187229   | 649675   | 994475   | 899764   | 921627   | 758742   | 934032   | 1182297  | 932357   | 849830   | 578864   |
| EIC     | Negative | 475.2244 | 3.00 | unknown | 132514   | 113864   | 39143    | 102659    | 211937   | 185145   | 266600   | 90975     | 115215    | 156913   | 133993   | 128923   | 121555   | 188409   | 153449   | 159377   | 151048   | 108959   | 219434   |
| EIC     | Negative | 616.3027 | 5.23 | unknown | 0        | 0        | 0        | 0         | 0        | 169980   | 0        | 0         | 0         | 0        | 235212   | 0        | 0        | 0        | 0        | 0        | 0        | 0        | 307194   |
| EIC     | Negative | 571.3706 | 5.76 | unknown | 326973   | 430978   | 298649   | 318642    | 409146   | 523880   | 415445   | 328387    | 347923    | 260247   | 395770   | 405344   | 373829   | 381839   | 422533   | 391995   | 412420   | 390845   | 374867   |
| fpHILIC | Negative | 279.1234 | 0.97 | unknown | 1094199  | 487849   | 506680   | 511142    | 1106946  | 1511628  | 957208   | 707338    | 636523    | 708474   | 855768   | 842639   | 798438   | 1009413  | 796063   | 859226   | 1016535  | 994875   | 579212   |
| EIC     | Negative | 516.3233 | 5.61 | unknown | 326761   | 424061   | 331682   | 413753    | 386730   | 431661   | 312996   | 345404    | 471302    | 338379   |          |          |          |          |          |          |          |          |          |

|         |          |          |      |         |          |          |          |          |          |          |          |          |          |         |          |          |         |         |          |          |         |         |          |         |
|---------|----------|----------|------|---------|----------|----------|----------|----------|----------|----------|----------|----------|----------|---------|----------|----------|---------|---------|----------|----------|---------|---------|----------|---------|
| EIC     | Negative | 225.0917 | 2.86 | unknown | 115268   | 94754    | 193237   | 120642   | 305785   | 247085   | 115645   | 216499   | 299071   | 207395  | 148369   | 373620   | 348488  | 138381  | 93336    | 155159   | 304695  | 328480  | 229041   |         |
| fpHILIC | Negative | 303.0595 | 2.48 | unknown | 827308   | 166733   | 300147   | 39304    | 606817   | 704282   | 417082   | 149647   | 508485   | 154654  | 0        | 0        | 431560  | 482336  | 0        | 0        | 691262  | 0       | 0        |         |
| fpHILIC | Positive | 160.0794 | 3.71 | unknown | 1042268  | 868677   | 978052   | 1010501  | 1137205  | 1402102  | 1295650  | 965511   | 1012902  | 1019647 | 903561   | 0        | 1147225 | 852348  | 712882   | 960096   | 996772  | 774311  | 927965   | 755457  |
| EIC     | Negative | 309.1711 | 5.20 | unknown | 4101150  | 0        | 2469894  | 0        | 4134445  | 0        | 3724174  | 2356477  | 0        | 0       | 2734720  | 0        | 2847721 | 0       | 0        | 0        | 0       | 4159772 | 0        | 2386656 |
| fpHILIC | Negative | 165.0403 | 2.96 | unknown | 4728657  | 3402449  | 2660990  | 3417830  | 4638569  | 5473687  | 5520055  | 3135269  | 4958819  | 3269227 | 3920512  | 4228516  | 3688422 | 3907628 | 4488581  | 5094485  | 4967342 | 3527293 | 3895335  |         |
| EIC     | Negative | 226.1446 | 2.00 | unknown | 0        | 139801   | 0        | 0        | 273185   | 353201   | 248121   | 0        | 153058   | 0       | 263279   | 528191   | 254069  | 134141  | 282936   | 260591   | 286521  | 0       | 136862   |         |
| EIC     | Negative | 441.2131 | 1.81 | unknown | 142101   | 141351   | 86162    | 0        | 193528   | 205325   | 171135   | 96775    | 67805    | 0       | 114298   | 104398   | 124288  | 80372   | 116618   | 76742    | 124488  | 0       | 100894   |         |
| EIC     | Negative | 363.2553 | 1.97 | unknown | 0        | 184569   | 0        | 0        | 310661   | 508545   | 1123480  | 0        | 730333   | 0       | 17964    | 29603    | 0       | 50234   | 0        | 0        | 0       | 0       | 68596    |         |
| EIC     | Negative | 419.1912 | 3.74 | unknown | 22486    | 105597   | 200947   | 50094    | 121243   | 29901    | 335545   | 264004   | 61849    | 69579   | 207465   | 33415    | 13727   | 48140   | 30472    | 0        | 14102   | 16731   | 0        |         |
| EIC     | Negative | 227.0380 | 1.71 | unknown | 242685   | 644158   | 187933   | 139524   | 799317   | 546878   | 1100871  | 281652   | 691987   | 215572  | 868475   | 946158   | 1066336 | 738924  | 287075   | 1084626  | 546035  | 69116   | 498870   |         |
| EIC     | Negative | 541.3712 | 5.61 | unknown | 3205364  | 4652329  | 3247572  | 3861459  | 3950772  | 4284620  | 3658232  | 3563776  | 4386187  | 3215523 | 3974259  | 3600201  | 3652832 | 3540045 | 3633517  | 3377516  | 3509930 | 3178143 | 4019765  |         |
| fpHILIC | Negative | 213.9981 | 0.97 | unknown | 17174702 | 14047676 | 10495868 | 4877611  | 19738434 | 28264534 | 14425637 | 10198725 | 9830976  | 117433  | 113821   | 110357   | 176781  | 96121   | 103723   | 143722   | 104286  | 77363   | 84603    |         |
| EIC     | Negative | 343.1401 | 1.49 | unknown | 0        | 73422    | 0        | 0        | 83749    | 99798    | 126049   | 0        | 140578   | 0       | 406693   | 237921   | 110118  | 501235  | 54801    | 155760   | 68229   | 0       | 128180   |         |
| EIC     | Negative | 319.1903 | 3.31 | unknown | 532895   | 149770   | 176877   | 148910   | 363299   | 417649   | 743946   | 833927   | 107402   | 26956   | 24623    | 28489    | 27056   | 25857   | 22007    | 18492    | 18319   | 32796   | 0        |         |
| EIC     | Negative | 585.3867 | 6.12 | unknown | 928510   | 1246821  | 937027   | 1123830  | 1156754  | 1262724  | 1262327  | 1224389  | 1058114  | 947508  | 1138146  | 1179346  | 1146360 | 1141956 | 1026838  | 1048469  | 1203270 | 1000933 | 1119362  |         |
| EIC     | Negative | 509.3503 | 3.28 | unknown | 113854   | 307161   | 337901   | 70718    | 326507   | 281103   | 236477   | 136220   | 422738   | 101596  | 257004   | 177058   | 233822  | 303939  | 487417   | 322822   | 247678  | 134027  | 201663   |         |
| EIC     | Negative | 288.1632 | 1.35 | unknown | 26434    | 192151   | 0        | 0        | 272101   | 260324   | 239492   | 0        | 343564   | 0       | 264410   | 210310   | 290318  | 82164   | 266008   | 398367   | 245991  | 0       | 107069   |         |
| fpHILIC | Negative | 894.5845 | 0.42 | unknown | 1337398  | 2234315  | 993378   | 1348792  | 2639508  | 2145219  | 1991389  | 1296658  | 2204104  | 1447962 | 1832254  | 1907673  | 2059288 | 1924032 | 1927664  | 2133800  | 2307001 | 1302937 | 1859114  |         |
| EIC     | Negative | 271.2281 | 4.51 | unknown | 1104974  | 451073   | 1114827  | 1083510  | 1271445  | 1191294  | 868727   | 1447736  | 1184881  | 701364  | 510637   | 604003   | 583785  | 738941  | 405945   | 683888   | 662999  | 1060890 | 647571   |         |
| EIC     | Negative | 338.2366 | 3.12 | unknown | 0        | 218223   | 0        | 0        | 220387   | 210924   | 0        | 210981   | 199378   | 230470  | 198348   | 221727   | 203384  | 217969  | 226893   | 223717   | 12591   | 0       | 219359   |         |
| EIC     | Negative | 473.2830 | 3.86 | unknown | 0        | 0        | 0        | 0        | 2659583  | 0        | 0        | 1392527  | 107676   | 486465  | 308789   | 107517   | 0       | 99792   | 180964   | 78011    | 270913  | 783196  | 0        |         |
| fpHILIC | Negative | 158.1183 | 2.32 | unknown | 286711   | 285569   | 298301   | 420092   | 269941   | 413809   | 402074   | 293891   | 549864   | 283804  | 378065   | 365272   | 396853  | 144854  | 247743   | 498880   | 283422  | 288281  | 208793   |         |
| fpHILIC | Negative | 192.0667 | 0.89 | unknown | 7791774  | 9165460  | 3883374  | 2927496  | 14074583 | 25208370 | 14703781 | 4936683  | 5796495  | 913443  | 1919042  | 2460571  | 1362037 | 1978947 | 1978198  | 4696941  | 1855170 | 1049104 | 1750115  |         |
| EIC     | Negative | 566.3829 | 5.89 | unknown | 7719086  | 11993544 | 8089133  | 8926632  | 12290574 | 14779503 | 11310417 | 7560335  | 12131741 | 6957177 | 12268668 | 10475917 | 9796877 | 8405901 | 10656633 | 10026082 | 9227258 | 6253226 | 10845128 |         |
| fpHILIC | Negative | 149.0457 | 2.80 | unknown | 1979957  | 2093331  | 1535408  | 1636512  | 2289356  | 3917101  | 3546074  | 1579202  | 2824234  | 2233968 | 3200617  | 3522880  | 3050156 | 3031222 | 2233513  | 2743113  | 3161558 | 2048688 | 2879950  |         |
| EIC     | Negative | 359.1840 | 3.65 | unknown | 7483842  | 7808994  | 7367314  | 7225555  | 7627382  | 7500867  | 8843012  | 8107008  | 2181196  | 7471960 | 7311819  | 7728826  | 7067062 | 7353540 | 7264443  | 7348474  | 6763233 | 7490357 | 8055314  |         |
| EIC     | Negative | 299.1877 | 1.98 | unknown | 0        | 1121010  | 0        | 0        | 103487   | 147525   | 117639   | 0        | 168779   | 0       | 201794   | 139835   | 175549  | 141758  | 117735   | 217041   | 108730  | 0       | 88152    |         |
| EIC     | Negative | 438.2941 | 5.75 | unknown | 500275   | 606314   | 455295   | 714013   | 903103   | 1058743  | 684122   | 479418   | 1067811  | 496670  | 613059   | 434406   | 377333  | 925245  | 432755   | 1058731  | 793846  | 594301  | 531266   |         |
| fpHILIC | Negative | 312.1721 | 0.35 | unknown | 2281535  | 4234609  | 4655105  | 9366607  | 12159847 | 12069089 | 7875151  | 6314243  | 8449711  | 8280721 | 7484640  | 12191054 | 4296798 | 5888574 | 4862063  | 5064599  | 9483581 | 4732670 | 6526260  |         |
| EIC     | Negative | 378.9949 | 1.19 | unknown | 130664   | 135767   | 136805   | 123642   | 129547   | 140590   | 133111   | 142050   | 137274   | 125653  | 131831   | 133776   | 136879  | 124572  | 132952   | 126531   | 133480  | 120656  | 131016   |         |
| fpHILIC | Negative | 387.1850 | 0.35 | unknown | 372011   | 657194   | 651445   | 1095533  | 1960520  | 1634860  | 1140849  | 921635   | 1087951  | 1309775 | 1075742  | 1734168  | 601649  | 1333536 | 746897   | 833092   | 1337760 | 669241  | 1080727  |         |
| EIC     | Negative | 491.2430 | 1.82 | unknown | 480736   | 124289   | 239636   | 0        | 519470   | 979736   | 648599   | 40183    | 136045   | 0       | 0        | 7639     | 9706    | 18801   | 0        | 0        | 22736   | 0       | 27988    |         |
| EIC     | Negative | 453.2822 | 1.71 | unknown | 238420   | 1530183  | 0        | 421067   | 0        | 4720206  | 4284700  | 2316549  | 556061   | 0       | 163063   | 177205   | 6532    | 360559  | 297240   | 238478   | 890196  | 369378  | 0        |         |
| EIC     | Negative | 257.2271 | 6.24 | unknown | 273771   | 816985   | 399064   | 1007818  | 1492119  | 494746   | 1036981  | 496335   | 2021082  | 227044  | 472481   | 80740    | 189831  | 535623  | 456567   | 1133918  | 1150999 | 442967  | 247541   |         |
| EIC     | Negative | 582.4618 | 6.41 | unknown | 641640   | 937272   | 1694677  | 16613081 | 1647340  | 973390   | 1461593  | 1761603  | 3701333  | 921099  | 793991   | 1523297  | 1321120 | 956041  | 615552   | 1161089  | 1285896 | 1409450 | 628121   |         |
| fpHILIC | Negative | 183.0121 | 0.35 | unknown | 131401   | 335312   | 347940   | 510565   | 828947   | 774615   | 549962   | 449985   | 544748   | 657077  | 632822   | 836362   | 300975  | 550472  | 364365   | 359857   | 668110  | 298273  | 416249   |         |
| EIC     | Negative | 241.1078 | 0.82 | unknown | 250302   | 299677   | 259488   | 238540   | 259518   | 263436   | 323876   | 220780   | 217882   | 220720  | 231630   | 258077   | 226594  | 302674  | 302674   | 275811   | 259348  | 263149  | 255681   |         |
| fpHILIC | Positive | 161.0915 | 2.96 | unknown | 977704   | 1372089  | 675451   | 745728   | 12190847 | 1654675  | 1489281  | 738516   | 1557414  | 524384  | 563382   | 714827   | 658040  | 886014  | 861733   | 1067079  | 929798  | 761464  | 905024   |         |
| EIC     | Negative | 367.2393 | 6.53 | unknown | 866606   | 1079107  | 786447   | 826211   | 721420   | 1800836  | 1416084  | 886088   | 928673   | 1821299 | 884258   | 854543   | 536803  | 582858  | 1019459  | 546476   | 577539  | 563546  | 0        |         |
| fpHILIC | Positive | 138.0489 | 2.07 | unknown | 1085639  | 79631    | 333825   | 0        | 1027518  | 734290   | 283241   | 35271    | 704331   | 79629   | 0        | 0        | 489090  | 707594  | 0        | 0        | 1081396 | 0       | 0        |         |
| EIC     | Negative | 321.0442 | 1.43 | unknown | 0        | 71697    | 0        | 0        | 78176    | 275412   | 84579    | 0        | 46679    | 0       | 81112    | 94401    | 93908   | 92857   | 116817   | 67182    | 73680   | 0       | 76920    |         |
| fpHILIC | Positive | 136.0421 | 2.47 | unknown | 346664   | 280029   | 241394   | 377704   | 546898   | 290597   | 416203   | 268735   | 920667   | 317349  | 393191   | 341063   | 462845  | 230160  | 306379   | 622317   | 348261  | 402968  | 211648   |         |
| fpHILIC | Positive | 131.0813 | 3.72 | unknown | 553018   | 340886   | 441600   | 460170   | 518276   | 675586   | 470209   | 506841   | 470209   | 412016  | 373184   | 433354   | 425261  | 361064  | 559320   | 496798   | 433808  | 61988   | 455811   |         |
| EIC     | Negative | 337.1415 | 3.43 | unknown | 135953   | 116902   | 193843   | 927629   | 358977   | 276391   | 402901   | 519954   | 724035   | 571237  | 341868   | 691598   | 559948  | 155581  | 175425   | 497173   | 457679  | 775679  | 184263   |         |
| EIC     | Negative | 495.3696 | 2.83 | unknown | 261506   | 420585   | 362383   | 214760   | 458120   | 256072   | 510777   | 445810   | 400523   | 622273  | 329141   | 339895   | 234319  | 611530  | 479201   | 357546   | 428145  | 401794  | 364375   |         |
| EIC     | Negative | 347.0515 | 1.19 | unknown | 537875   | 596525   | 521819   | 485583   | 593403   | 689911   | 677982   | 498308   | 589623   | 558370  | 635176   | 621741   | 591389  | 621451  | 619264   | 575754   | 634982  | 420931  | 648071   |         |
| EIC     | Negative | 495.3696 | 3.37 | unknown | 510003   | 367812   | 378337   | 623641   | 544490   | 510954   | 417157   | 788744   | 572764   | 277106  | 459112   | 471491   | 499840  | 382214  | 760137   | 589491   | 295298  | 495411  | 377046   |         |
| EIC     | Negative | 461.2908 | 2.47 | unknown | 84808    | 28914    | 125305   | 35816    | 192036   | 29068    | 66403    | 355282   | 133667   | 72104   | 38377    | 34621    | 29763   | 106129  | 114414   | 77400    | 67783   | 391040  | 91890    |         |
| EIC     | Negative | 462.1128 | 1.48 | unknown | 0        | 56614    | 0        | 0        | 139657   | 335218   | 1060641  | 0        | 70346    | 0       | 181260   | 102035   | 81261   | 77483   | 23870    | 93566    | 131444  | 0       | 36812    |         |
| EIC     | Negative | 393.2653 | 2.62 | unknown | 256145   | 34587    | 0        | 0        | 127906   | 0        | 331355   | 278955   | 218097   | 0       | 0        | 0        |         |         |          |          |         |         |          |         |



|         |          |          |      |         |           |           |          |           |           |           |           |           |           |          |           |           |           |           |           |           |           |          |           |
|---------|----------|----------|------|---------|-----------|-----------|----------|-----------|-----------|-----------|-----------|-----------|-----------|----------|-----------|-----------|-----------|-----------|-----------|-----------|-----------|----------|-----------|
| EIC     | Negative | 463.3425 | 6.61 | unknown | 1174838   | 666470    | 190939   | 320252    | 3557657   | 2073331   | 2525574   | 1645817   | 3881024   | 183262   | 621670    | 1456345   | 2493568   | 3472684   | 1843942   | 2110988   | 3425171   | 1205273  | 2385444   |
| EIC     | Negative | 415.2164 | 1.56 | unknown | 37620     | 603514    | 0        | 122837    | 1044150   | 33475     | 890479    | 44671     | 1935928   | 0        | 0         | 0         | 15292     | 0         | 0         | 0         | 0         | 0        | 84867     |
| EIC     | Negative | 593.4788 | 6.57 | unknown | 1958444   | 1239978   | 1172356  | 1370726   | 1697193   | 1873787   | 1814319   | 2730658   | 1434787   | 2409126  | 1911489   | 1969460   | 1886520   | 1977405   | 1770269   | 1590780   | 1828987   | 2122254  |           |
| EIC     | Negative | 564.5084 | 6.65 | unknown | 180310    | 309880    | 542779   | 645590    | 428303    | 466531    | 435510    | 491388    | 697931    | 284157   | 235011    | 355176    | 613243    | 346469    | 210455    | 473058    | 318445    | 372210   | 226825    |
| fpHILIC | Positive | 112.0870 | 4.47 | unknown | 2030117   | 4911722   | 1885583  | 5163625   | 3243265   | 7171675   | 2137201   | 5019560   | 8655113   | 2335992  | 3446974   | 4415662   | 6331440   | 4470103   | 4737413   | 6481293   | 4291787   | 5713219  | 4697952   |
| fpHILIC | Positive | 222.0583 | 0.57 | unknown | 2364999   | 2682288   | 1000008  | 1366440   | 2882960   | 5909890   | 2152651   | 1663048   | 4031535   | 0        | 0         | 0         | 0         | 0         | 0         | 0         | 0         | 0        | 0         |
| fpHILIC | Negative | 524.2783 | 0.50 | unknown | 4484048   | 10223448  | 2263319  | 3552335   | 10046995  | 9491353   | 9649853   | 3929237   | 12428929  | 2441886  | 6487890   | 7063633   | 6443088   | 7286598   | 7169715   | 6562376   | 8408240   | 2228600  | 5990923   |
| EIC     | Negative | 524.2786 | 4.54 | unknown | 109056373 | 215185054 | 92208702 | 139615952 | 206036691 | 198834741 | 185581365 | 137855306 | 210726939 | 96596188 | 134395955 | 136818376 | 146850131 | 169174770 | 152307114 | 126425230 | 162983274 | 11212470 | 151037626 |
| EIC     | Negative | 629.3659 | 4.26 | unknown | 0         | 0         | 0        | 1503199   | 1692067   | 1931390   | 0         | 1237601   | 1711719   | 0        | 0         | 0         | 0         | 0         | 0         | 0         | 0         | 0        | 0         |
| EIC     | Negative | 272.2315 | 4.51 | unknown | 183821    | 54738     | 187900   | 165594    | 213129    | 214785    | 134288    | 241697    | 193888    | 142042   | 53229     | 58368     | 117508    | 138006    | 0         | 0         | 0         | 0        | 0         |
| EIC     | Negative | 510.3589 | 3.57 | unknown | 29489     | 180438    | 31694    | 0         | 144576    | 183863    | 136239    | 31082     | 237977    | 0        | 145004    | 113931    | 131990    | 144460    | 184002    | 166365    | 117094    | 29330    | 98061     |
| EIC     | Negative | 604.2911 | 2.20 | unknown | 0         | 207491    | 0        | 43963     | 168314    | 175707    | 281729    | 62890     | 224522    | 314181   | 174786    | 201069    | 181434    | 141488    | 127925    | 164373    | 219219    | 106606   | 252828    |
| EIC     | Negative | 569.3659 | 5.50 | unknown | 1347852   | 1979071   | 1259985  | 1517012   | 1847162   | 2077740   | 1745909   | 1634276   | 1495378   | 1175649  | 1613136   | 1669895   | 1637469   | 1610869   | 1526627   | 1380003   | 1524603   | 1177854  | 1579615   |
| EIC     | Negative | 291.1600 | 2.53 | unknown | 56847     | 45408     | 77103    | 28521     | 59860     | 53386     | 81161     | 99264     | 33155     | 32522    | 44620     | 34614     | 45662     | 46177     | 29519     | 45518     | 32973     | 108611   | 53668     |
| fpHILIC | Negative | 224.1292 | 0.45 | unknown | 495565    | 514146    | 594541   | 416029    | 592128    | 818066    | 603688    | 344874    | 506108    | 489554   | 1092905   | 991725    | 667597    | 1076302   | 411391    | 476749    | 598954    | 241156   | 590356    |
| fpHILIC | Negative | 339.1997 | 0.35 | unknown | 5238671   | 10699347  | 12432930 | 20114202  | 32788824  | 27584660  | 19510650  | 16248549  | 22808396  | 21111794 | 19338822  | 32193374  | 10055731  | 21759554  | 13185659  | 12550427  | 28617324  | 10646271 | 15882926  |
| EIC     | Negative | 483.0908 | 1.48 | unknown | 0         | 12802     | 0        | 0         | 48307     | 105060    | 348367    | 0         | 0         | 0        | 63271     | 34163     | 0         | 27243     | 0         | 32921     | 45748     | 0        | 9069      |
| EIC     | Negative | 437.2458 | 2.06 | unknown | 361242    | 1027361   | 0        | 0         | 1107011   | 1012695   | 1075807   | 420442    | 907026    | 249477   | 879661    | 1045238   | 753201    | 755512    | 816467    | 756693    | 904950    | 306708   | 948032    |
| EIC     | Negative | 272.1693 | 2.16 | unknown | 1738858   | 1257628   | 1209277  | 3347512   | 1990317   | 1285814   | 2070951   | 2130777   | 3016797   | 1922326  | 1204817   | 1265048   | 1901811   | 386882    | 1085223   | 2763940   | 1324195   | 2937204  | 646481    |
| EIC     | Negative | 566.0064 | 0.55 | unknown | 149904    | 470495    | 266413   | 519136    | 693456    | 293221    | 650525    | 1198758   | 336524    | 142519   | 387959    | 448288    | 566058    | 704830    | 362455    | 342667    | 510427    | 534407   | 104429    |
| EIC     | Negative | 379.2480 | 1.74 | unknown | 499511    | 155221    | 178103   | 0         | 344129    | 682095    | 663403    | 58258     | 399902    | 0        | 15174     | 15534     | 21755     | 18789     | 16562     | 19204     | 15297     | 0        | 16921     |
| EIC     | Negative | 327.1458 | 1.33 | unknown | 84277     | 95738     | 0        | 0         | 133294    | 129491    | 131212    | 0         | 88312     | 0        | 391532    | 233786    | 150012    | 521371    | 70219     | 156026    | 70424     | 0        | 112540    |
| EIC     | Negative | 649.0095 | 0.55 | unknown | 95698     | 283785    | 175238   | 255874    | 374316    | 159049    | 396774    | 813886    | 195512    | 143502   | 249232    | 295014    | 364216    | 401041    | 205317    | 141313    | 318109    | 293744   | 70235     |
| fpHILIC | Positive | 528.3037 | 0.50 | unknown | 543331    | 527754    | 388132   | 426183    | 611985    | 631348    | 587457    | 352691    | 658405    | 228521   | 466478    | 590597    | 408821    | 452317    | 409967    | 326898    | 516735    | 227683   | 339025    |
| EIC     | Negative | 337.2327 | 3.73 | unknown | 0         | 216274    | 0        | 0         | 291744    | 298720    | 0         | 343397    | 0         | 411533   | 244931    | 0         | 343853    | 161097    | 0         | 367791    | 271689    | 0        | 182523    |
| EIC     | Negative | 303.2333 | 4.96 | unknown | 197255    | 143722    | 176827   | 352407    | 221031    | 277966    | 263055    | 256832    | 291994    | 184345   | 214775    | 198533    | 248423    | 99604     | 161504    | 249131    | 155266    | 193566   | 146141    |
| fpHILIC | Positive | 147.0220 | 2.99 | unknown | 529272    | 923623    | 782691   | 1064974   | 1694410   | 7049561   | 1909346   | 477340    | 1143408   | 586888   | 1019879   | 1536343   | 1362219   | 586892    | 1258743   | 1865514   | 1739155   | 1174352  | 1475320   |
| EIC     | Negative | 250.1120 | 1.48 | unknown | 0         | 24090     | 0        | 0         | 31936     | 41713     | 47672     | 0         | 70339     | 0        | 32786     | 38820     | 50322     | 16168     | 27451     | 57247     | 37588     | 0        | 12539     |
| EIC     | Negative | 560.4752 | 6.47 | unknown | 16100565  | 20244144  | 20007801 | 21031247  | 21233151  | 16915104  | 21075544  | 19993470  | 28746470  | 22659715 | 17296264  | 19740478  | 20476921  | 16602435  | 17269345  | 21252793  | 21216175  | 26265733 | 18359967  |
| EIC     | Negative | 442.0726 | 2.09 | unknown | 47416     | 111686    | 0        | 0         | 77008     | 178471    | 190186    | 64243     | 217179    | 0        | 234935    | 0         | 31575     | 95601     | 196208    | 314975    | 0         | 0        | 150338    |
| EIC     | Negative | 321.2913 | 3.99 | unknown | 554374    | 562570    | 572962   | 537672    | 595921    | 593738    | 561151    | 574515    | 529589    | 543660   | 577206    | 529404    | 524748    | 511473    | 518612    | 561876    | 560357    | 539267   | 559600    |
| EIC     | Negative | 500.9273 | 4.20 | unknown | 208784    | 274965    | 193207   | 236077    | 276105    | 295671    | 239820    | 201636    | 271218    | 181186   | 263869    | 230796    | 246245    | 275987    | 265870    | 253391    | 226877    | 192172   | 214421    |
| EIC     | Negative | 283.1023 | 2.25 | unknown | 0         | 112188    | 0        | 0         | 17162     | 145255    | 89929     | 177567    | 52037     | 109421   | 38578     | 28340     | 23888     | 135859    | 117333    | 38633     | 0         | 0        | 37505     |
| EIC     | Negative | 269.1402 | 2.24 | unknown | 163342    | 148376    | 192762   | 284122    | 188451    | 210506    | 240552    | 395036    | 236385    | 312722   | 119716    | 148597    | 138535    | 126927    | 142503    | 182720    | 163453    | 371041   | 208511    |
| EIC     | Negative | 343.1780 | 6.05 | unknown | 129665    | 98900     | 164278   | 122597    | 146437    | 133552    | 222418    | 222975    | 78794     | 185061   | 125643    | 18899     | 18620     | 0         | 105462    | 186280    | 18620     | 0        | 430925    |
| EIC     | Negative | 227.1651 | 2.82 | unknown | 114300    | 120204    | 241340   | 122338    | 176397    | 226175    | 196446    | 236115    | 146395    | 146542   | 156692    | 272387    | 218951    | 103195    | 145308    | 175316    | 162420    | 193024   | 122988    |
| EIC     | Negative | 349.0490 | 0.57 | unknown | 46951     | 76229     | 159754   | 408293    | 129757    | 59428     | 131827    | 126588    | 165626    | 146542   | 99791     | 112738    | 236510    | 12695     | 68526     | 240703    | 55041     | 214361   | 662434    |
| fpHILIC | Positive | 526.3767 | 0.55 | unknown | 8916989   | 10690752  | 9517607  | 11133795  | 13683256  | 13506429  | 11115681  | 10898899  | 9274754   | 10926128 | 10795809  | 12597934  | 11471977  | 10902567  | 11898953  | 9343181   | 12500886  | 11284911 | 11050815  |
| EIC     | Negative | 371.1397 | 2.85 | unknown | 0         | 87019     | 0        | 0         | 123347    | 87371     | 87371     | 0         | 43736     | 136984   | 129543    | 122443    | 117634    | 55290     | 99886     | 92805     | 169547    | 0        | 49736     |
| EIC     | Negative | 250.0259 | 1.93 | unknown | 0         | 8751      | 0        | 0         | 109726    | 86715     | 99953     | 0         | 79442     | 0        | 163951    | 142209    | 143013    | 160197    | 44936     | 85681     | 137829    | 0        | 101416    |
| EIC     | Negative | 453.2865 | 1.66 | unknown | 316976    | 200943    | 117639   | 0         | 261112    | 548565    | 636276    | 0         | 226116    | 0        | 0         | 0         | 0         | 24620     | 401028    | 25668     | 74759     | 19037    |           |
| EIC     | Negative | 346.2029 | 3.39 | unknown | 545550    | 390441    | 585717   | 409566    | 552808    | 533000    | 600255    | 730062    | 360581    | 522887   | 473463    | 413363    | 406860    | 403204    | 488418    | 422373    | 404400    | 537389   | 379185    |
| EIC     | Negative | 295.2643 | 6.66 | unknown | 190984    | 248613    | 365105   | 536588    | 341685    | 395934    | 337010    | 346428    | 496752    | 314247   | 294578    | 434937    | 404439    | 342442    | 288774    | 398435    | 365868    | 490129   | 300787    |
| EIC     | Negative | 416.2659 | 1.90 | unknown | 0         | 36659     | 0        | 0         | 61391     | 59081     | 68755     | 0         | 146789    | 0        | 59279     | 56481     | 64028     | 22805     | 34607     | 85764     | 51587     | 0        | 28606     |
| fpHILIC | Negative | 213.0099 | 0.97 | unknown | 34677116  | 27642664  | 22345810 | 10184652  | 38861712  | 54237204  | 28975176  | 19796590  | 19152020  | 242055   | 239877    | 259304    | 280972    | 208402    | 268795    | 289867    | 156033    | 108467   | 235553    |
| EIC     | Negative | 299.2531 | 5.99 | unknown | 0         | 0         | 0        | 0         | 0         | 0         | 751591    | 0         | 225831    | 581260   | 260933    | 599595    | 564833    | 0         | 89397     | 180834    | 0         | 0        | 687063    |
| EIC     | Negative | 546.3176 | 5.77 | unknown | 362501    | 555864    | 347492   | 411792    | 498340    | 546690    | 482992    | 450822    | 402266    | 330424   | 456707    | 434743    | 444935    | 434345    | 426375    | 406247    | 466475    | 364782   | 434071    |
| EIC     | Negative | 527.2963 | 4.72 | unknown | 241788    | 581926    | 265759   | 305671    | 619573    | 614299    | 426635    | 356026    | 770480    | 274918   | 435764    | 381008    | 364756    | 814632    | 569764    | 434811    | 496225    | 287398   | 442880    |
| EIC     | Negative | 373.3152 | 6.35 | unknown | 239138    | 451568    | 200745   | 211064    | 450161    | 302618    | 433019    | 455863    | 285770    | 211139   | 275560    | 287259    | 379704    | 245239    | 238364    | 304464    | 352216    | 318641   | 434691    |
| fpHILIC | Negative | 181.0870 | 0.61 | unknown | 2213339   | 2376599   | 4427739  | 2623586   | 3871170   | 2651816   | 3505635   | 4225128   | 3064823   | 8934986  | 8366548   | 7530375   | 4814309   | 5978010   | 1105312   | 3567067   | 1978202   | 2252232  | 2081183   |
| EIC     | Negative | 50       |      |         |           |           |          |           |           |           |           |           |           |          |           |           |           |           |           |           |           |          |           |

|         |          |          |      |         |          |          |          |          |          |          |          |          |          |          |          |          |          |          |          |          |          |          |          |
|---------|----------|----------|------|---------|----------|----------|----------|----------|----------|----------|----------|----------|----------|----------|----------|----------|----------|----------|----------|----------|----------|----------|----------|
| fpHILIC | Positive | 151.1438 | 2.08 | unknown | 7008461  | 6000321  | 5632095  | 1056206  | 6673479  | 52756648 | 17974854 | 731279   | 4632397  | 1174339  | 13974185 | 7544043  | 38264616 | 0        | 3524041  | 3655692  | 2370514  | 904789   | 7360060  |
| fpHILIC | Positive | 351.1978 | 3.71 | unknown | 2083180  | 1293539  | 1342842  | 1098926  | 1717485  | 2299828  | 1928289  | 1226869  | 1234795  | 1046736  | 1172478  | 1295907  | 1219933  | 852276   | 1402210  | 1544628  | 1093321  | 1114492  | 974260   |
| fpHILIC | Positive | 416.2150 | 0.41 | unknown | 3645518  | 3765876  | 3326833  | 3684636  | 5492656  | 5260463  | 3709966  | 3963732  | 11635628 | 3797517  | 3594067  | 3951653  | 4806115  | 4635632  | 2722328  | 3414819  | 3846859  | 4175420  | 2742695  |
| EIC     | Negative | 544.3217 | 5.77 | unknown | 922905   | 1396607  | 974983   | 1069452  | 1327874  | 1400754  | 1277599  | 1101402  | 1115557  | 872361   | 1163090  | 1140276  | 1125823  | 1085507  | 1035641  | 1107566  | 1120243  | 957489   | 1110662  |
| EIC     | Negative | 305.1748 | 3.63 | unknown | 229900   | 199018   | 257670   | 294579   | 183323   | 221068   | 302095   | 425632   | 336216   | 320061   | 119794   | 221718   | 286082   | 131752   | 168938   | 209456   | 229481   | 248947   | 152885   |
| EIC     | Negative | 602.3468 | 4.72 | unknown | 18940376 | 22873485 | 17057184 | 19131752 | 23584018 | 25604522 | 27822043 | 21586397 | 19071649 | 17418108 | 20866380 | 24343343 | 23159678 | 18416937 | 20572309 | 19203991 | 22171982 | 16201820 | 20558627 |
| EIC     | Negative | 292.0114 | 0.55 | unknown | 26912    | 123428   | 116553   | 129950   | 110492   | 88099    | 151451   | 234111   | 112977   | 61447    | 109883   | 127459   | 121448   | 50018    | 93145    | 113302   | 151079   | 157128   | 64892    |
| EIC     | Negative | 460.2752 | 5.12 | unknown | 52150    | 0        | 0        | 0        | 0        | 0        | 173458   | 243133   | 0        | 0        | 0        | 0        | 0        | 0        | 0        | 161219   | 0        | 0        |          |
| fpHILIC | Positive | 152.1473 | 2.08 | unknown | 480584   | 331982   | 362130   | 132701   | 436770   | 347984   | 1246765  | 30009    | 354404   | 47418    | 858646   | 531770   | 2500296  | 0        | 265695   | 228208   | 151123   | 0        | 605337   |
| fpHILIC | Negative | 132.0452 | 0.96 | unknown | 1094599  | 826614   | 690212   | 397326   | 1128446  | 2006386  | 866245   | 740732   | 666296   | 0        | 0        | 0        | 0        | 0        | 0        | 30129    | 0        | 0        | 0        |
| EIC     | Negative | 363.2180 | 1.89 | unknown | 359386   | 317220   | 0        | 0        | 600764   | 1631485  | 502862   | 0        | 542520   | 0        | 532100   | 645436   | 687414   | 387255   | 642156   | 1087950  | 575556   | 0        | 330219   |
| EIC     | Negative | 429.1953 | 1.92 | unknown | 0        | 121320   | 0        | 0        | 382781   | 83636    | 187338   | 0        | 187244   | 0        | 106313   | 100883   | 126070   | 122163   | 150179   | 126548   | 121652   | 0        | 106248   |
| EIC     | Negative | 455.0134 | 0.55 | unknown | 272790   | 749033   | 684307   | 798323   | 663814   | 512543   | 839781   | 1777566  | 848684   | 420269   | 769501   | 848478   | 856301   | 294249   | 641012   | 557962   | 988698   | 1007622  | 335972   |
| fpHILIC | Positive | 370.2947 | 0.60 | unknown | 2557553  | 2074874  | 3105647  | 6384294  | 3192759  | 3576829  | 3638179  | 3730537  | 5979772  | 2962094  | 2215117  | 2493397  | 3008383  | 794845   | 1458648  | 3731710  | 1828952  | 2818931  | 1886718  |
| fpHILIC | Negative | 278.2206 | 0.38 | unknown | 2900248  | 4054886  | 4932572  | 6442316  | 4611038  | 3619718  | 4232610  | 6002612  | 7771099  | 3550254  | 3066009  | 3667761  | 4839971  | 2203612  | 3237473  | 2947332  | 4068507  | 3607466  | 3456177  |
| EIC     | Negative | 564.3663 | 4.99 | unknown | 398732   | 547712   | 367989   | 464080   | 634160   | 613428   | 519491   | 335436   | 573779   | 385957   | 509978   | 501949   | 511256   | 363656   | 558956   | 529216   | 461655   | 341075   | 461769   |
| fpHILIC | Negative | 500.2784 | 0.51 | unknown | 8016202  | 12662830 | 5866781  | 5534536  | 12596603 | 13936532 | 12009148 | 6759629  | 10373419 | 4903021  | 9200402  | 9275060  | 8177341  | 11144386 | 11811210 | 6946667  | 11661153 | 4668688  | 10819332 |
| fpHILIC | Negative | 618.3403 | 0.62 | unknown | 722136   | 729513   | 920209   | 720058   | 684420   | 1276304  | 930209   | 983028   | 749431   | 630269   | 806516   | 924069   | 875674   | 672688   | 655850   | 690018   | 827938   | 560631   | 935639   |
| fpHILIC | Negative | 142.5059 | 0.44 | unknown | 791217   | 1098603  | 1497147  | 1372914  | 902739   | 1079683  | 1652739  | 1406199  | 1286379  | 1772814  | 1269120  | 1279448  | 1331626  | 897642   | 824728   | 932003   | 1350353  | 1076676  | 1159034  |
| EIC     | Negative | 502.2942 | 4.93 | unknown | 3397511  | 6302075  | 3935557  | 3471065  | 6446460  | 8132025  | 5781460  | 3856844  | 4278823  | 2667020  | 4790394  | 3341963  | 3417472  | 5680494  | 5111848  | 3103578  | 5009039  | 3181928  | 4556497  |
| fpHILIC | Positive | 77.0796  | 2.09 | unknown | 744399   | 679794   | 648990   | 312731   | 796179   | 2905760  | 1443193  | 172295   | 761079   | 230925   | 1808669  | 983666   | 2222004  | 52539    | 458357   | 578495   | 442246   | 245843   | 951027   |
| EIC     | Positive | 385.1877 | 2.17 | unknown | 45173    | 175751   | 36045    | 101572   | 137603   | 86585    | 175539   | 106994   | 263920   | 38501    | 124602   | 103370   | 119111   | 156891   | 159369   | 191282   | 104683   | 125260   | 106008   |
| EIC     | Negative | 540.2733 | 2.82 | unknown | 338500   | 675609   | 304833   | 291597   | 550440   | 855758   | 461300   | 364853   | 1068007  | 416915   | 438439   | 622897   | 453400   | 406003   | 657463   | 771874   | 830252   | 257487   | 737511   |
| fpHILIC | Positive | 155.0536 | 2.44 | unknown | 1181348  | 674440   | 2225072  | 2093743  | 1593411  | 2505393  | 1066860  | 2791478  | 5634451  | 1654410  | 1059607  | 3046558  | 3581137  | 2848346  | 762451   | 2034580  | 2262077  | 1496138  | 839619   |
| EIC     | Negative | 401.2184 | 1.99 | unknown | 0        | 541643   | 0        | 0        | 562640   | 860495   | 984542   | 0        | 820694   | 0        | 630388   | 685158   | 490300   | 280733   | 629353   | 566195   | 444989   | 0        | 336184   |
| EIC     | Negative | 318.2672 | 3.43 | unknown | 614268   | 651709   | 567532   | 523806   | 607497   | 631977   | 615191   | 608407   | 851238   | 530413   | 614209   | 635342   | 600047   | 583270   | 616616   | 558772   | 596078   | 527801   | 617658   |
| EIC     | Negative | 445.2958 | 3.08 | unknown | 2801659  | 1173773  | 1482294  | 1016546  | 1687249  | 1964528  | 1536452  | 3060325  | 2790479  | 1131012  | 734134   | 1387568  | 1157494  | 2021547  | 1669163  | 1305018  | 1275548  | 227830   | 1132540  |
| EIC     | Negative | 564.2584 | 1.64 | unknown | 232341   | 253655   | 0        | 0        | 186530   | 287828   | 378087   | 228417   | 292944   | 251013   | 283220   | 353753   | 306613   | 188096   | 145070   | 0        | 287317   | 49487    | 312677   |
| EIC     | Negative | 557.3570 | 6.10 | unknown | 63020    | 1210460  | 175583   | 0        | 909678   | 1751435  | 0        | 0        | 0        | 0        | 0        | 0        | 0        | 0        | 0        | 0        | 0        | 0        | 0        |
| fpHILIC | Negative | 263.0650 | 1.04 | unknown | 626069   | 627094   | 441686   | 878303   | 742094   | 729731   | 607501   | 515031   | 717011   | 643542   | 514585   | 514147   | 583172   | 434320   | 463226   | 490166   | 590469   | 528167   | 392758   |
| fpHILIC | Positive | 281.1383 | 0.41 | unknown | 510261   | 536795   | 430286   | 503719   | 755710   | 722478   | 502097   | 637664   | 1899439  | 575111   | 493515   | 714698   | 710089   | 626782   | 384343   | 511210   | 463334   | 579001   | 362404   |
| fpHILIC | Positive | 129.0261 | 3.13 | unknown | 531110   | 706973   | 628175   | 739255   | 771245   | 825916   | 784694   | 750161   | 618875   | 601801   | 735374   | 694074   | 622419   | 472020   | 566636   | 774043   | 558925   | 596869   | 519117   |
| EIC     | Negative | 283.1111 | 3.08 | unknown | 332533   | 438464   | 374005   | 508835   | 418517   | 567282   | 508794   | 508835   | 373012   | 472029   | 371982   | 368548   | 415932   | 419421   | 443840   | 442114   | 480371   | 319812   | 482922   |
| fpHILIC | Positive | 221.1211 | 1.65 | unknown | 0        | 5277987  | 2349047  | 2963015  | 2352119  | 6195674  | 3642545  | 1680864  | 3787849  | 2383514  | 3957465  | 3862241  | 0        | 3435193  | 5397758  | 5043328  | 1526264  | 2627239  | 0        |
| EIC     | Negative | 602.3469 | 4.89 | unknown | 3953987  | 5152724  | 4057117  | 4103957  | 4986301  | 5769757  | 4842156  | 3806874  | 3781695  | 4541854  | 5691035  | 5217371  | 4338065  | 4470760  | 4311711  | 5402458  | 3997668  | 5357797  | 0        |
| fpHILIC | Positive | 192.0736 | 3.10 | unknown | 220104   | 379467   | 301240   | 389260   | 359915   | 424169   | 290319   | 253557   | 704175   | 286944   | 346306   | 350190   | 352298   | 284797   | 375635   | 398343   | 328542   | 254434   | 262524   |
| EIC     | Negative | 509.3498 | 1.86 | unknown | 69313    | 65906    | 0        | 0        | 98749    | 81326    | 75871    | 0        | 92628    | 0        | 68408    | 58871    | 60197    | 97568    | 93335    | 63834    | 0        | 60512    |          |
| EIC     | Negative | 454.2847 | 4.98 | unknown | 564762   | 827055   | 535711   | 729831   | 752860   | 838536   | 607105   | 593138   | 905115   | 489482   | 516086   | 614882   | 495503   | 864460   | 512991   | 467572   | 631591   | 486663   | 597026   |
| EIC     | Negative | 499.2650 | 3.99 | unknown | 334223   | 1422246  | 0        | 0        | 376598   | 1288020  | 826980   | 803885   | 463192   | 2737447  | 270528   | 81430    | 702909   | 1693019  | 89892    | 74843    | 970157   | 333839   | 727554   |
| EIC     | Negative | 253.1062 | 1.37 | unknown | 0        | 148391   | 0        | 0        | 247421   | 182847   | 316480   | 0        | 390948   | 0        | 189551   | 210883   | 217749   | 122322   | 153927   | 199612   | 233145   | 0        | 163123   |
| EIC     | Negative | 255.2230 | 6.42 | unknown | 2676693  | 3020414  | 5620203  | 6290844  | 5375450  | 4063736  | 5675892  | 5453652  | 6040881  | 4354675  | 3379719  | 5180920  | 5506747  | 2457747  | 2420632  | 6040881  | 5657438  | 4377734  | 2614218  |
| EIC     | Negative | 299.0957 | 2.76 | unknown | 68128    | 288481   | 51342    | 42404    | 361540   | 268021   | 437294   | 85543    | 127243   | 15720    | 275486   | 190258   | 91675    | 112309   | 295008   | 232700   | 115482   | 39224    | 78448    |
| EIC     | Negative | 423.0376 | 1.19 | unknown | 145102   | 156756   | 138921   | 151446   | 173192   | 189621   | 186667   | 167037   | 156419   | 165419   | 173760   | 161956   | 174194   | 171296   | 149761   | 197316   | 173216   | 147578   | 198945   |
| EIC     | Negative | 391.1975 | 1.97 | unknown | 0        | 350823   | 0        | 0        | 593684   | 469562   | 585815   | 0        | 363276   | 0        | 403913   | 313581   | 337990   | 126246   | 298829   | 461339   | 37386    | 0        | 243913   |
| fpHILIC | Negative | 79.9573  | 0.97 | unknown | 3233037  | 2836972  | 2324265  | 1178047  | 4018140  | 5576484  | 2798867  | 1853253  | 1753216  | 115226   | 110111   | 143041   | 117103   | 73841    | 118641   | 138096   | 96322    | 140006   | 136688   |
| EIC     | Negative | 262.1123 | 2.05 | unknown | 0        | 195219   | 0        | 0        | 204297   | 196568   | 213497   | 0        | 221461   | 0        | 182348   | 183019   | 193982   | 246153   | 209051   | 203250   | 234771   | 0        | 178855   |
| EIC     | Negative | 302.2206 | 6.25 | unknown | 9146689  | 27076286 | 10889743 | 31751814 | 30852609 | 15827001 | 23294888 | 16702742 | 5209691  | 14384853 | 15378779 | 12290984 | 28939707 | 17066151 | 15034262 | 26006435 | 24582045 | 13433720 | 11042575 |
| EIC     | Negative | 246.1533 | 1.67 | unknown | 782930   | 992206   | 665297   | 2490615  | 1329447  | 1661345  | 1567104  | 796811   | 2699791  | 1473954  | 1634728  | 1269538  | 2106690  | 371963   | 1339735  | 2224197  | 1454481  | 1726432  | 584093   |
| EIC     | Negative | 354.2277 | 2.72 | unknown | 418935   | 543850   | 517534   | 415284   | 474516   | 546062   | 528229   | 465221   | 595710   | 415444   | 553239   | 536986   | 564993   | 586268   | 581641   | 498216   | 524455   | 452588   |          |

|         |          |          |      |         |         |         |         |         |         |         |         |         |          |         |         |         |         |         |         |         |         |         |         |         |
|---------|----------|----------|------|---------|---------|---------|---------|---------|---------|---------|---------|---------|----------|---------|---------|---------|---------|---------|---------|---------|---------|---------|---------|---------|
| EIC     | Negative | 487.1907 | 4.08 | unknown | 132987  | 147809  | 123787  | 198179  | 181289  | 153012  | 197091  | 165346  | 251112   | 233339  | 158059  | 197411  | 187699  | 83995   | 99965   | 200196  | 183565  | 209023  | 100814  |         |
| EIC     | Negative | 359.1902 | 3.65 | unknown | 7243091 | 0       | 7208673 | 7314741 | 7100793 | 7034703 | 7557623 | 7550868 | 8214069  | 0       | 0       | 0       | 0       | 0       | 0       | 0       | 0       | 0       | 0       | 7512612 |
| fpHILIC | Negative | 277.0595 | 1.04 | unknown | 1207305 | 854213  | 914206  | 1096207 | 1221454 | 1370408 | 799227  | 1033018 | 811055   | 694498  | 640932  | 642298  | 629354  | 584294  | 632077  | 691172  | 636900  | 438967  | 0       |         |
| EIC     | Negative | 233.1185 | 2.23 | unknown | 80208   | 51586   | 34308   | 80609   | 59357   | 50917   | 52425   | 96800   | 104410   | 69729   | 38580   | 53387   | 51543   | 36455   | 43189   | 54616   | 60722   | 80630   | 71098   |         |
| fpHILIC | Negative | 405.0291 | 4.72 | unknown | 933852  | 583210  | 807527  | 887693  | 895472  | 1234838 | 793901  | 879403  | 1046066  | 866627  | 729744  | 778288  | 854908  | 915162  | 767548  | 1009558 | 842790  | 931898  | 729075  |         |
| EIC     | Negative | 244.1999 | 3.59 | unknown | 171450  | 48996   | 88894   | 89554   | 142368  | 163777  | 91781   | 140194  | 91016    | 71357   | 59678   | 54892   | 58115   | 62812   | 30727   | 55899   | 59296   | 83051   | 60704   |         |
| EIC     | Negative | 352.2193 | 3.55 | unknown | 70003   | 58960   | 179964  | 52056   | 143687  | 87432   | 112295  | 188725  | 94652    | 162211  | 65245   | 73807   | 64462   | 97893   | 48160   | 53559   | 88568   | 147617  | 69365   |         |
| fpHILIC | Negative | 351.0565 | 4.50 | unknown | 578170  | 411902  | 233057  | 421216  | 565818  | 875029  | 533615  | 327766  | 1156348  | 223430  | 476568  | 725597  | 759094  | 731445  | 713556  | 761106  | 861819  | 277684  | 402342  |         |
| EIC     | Negative | 303.0913 | 1.97 | unknown | 0       | 107737  | 0       | 0       | 172735  | 106793  | 159223  | 0       | 110618   | 0       | 139685  | 89663   | 84040   | 72353   | 144220  | 131827  | 77200   | 0       | 52594   |         |
| fpHILIC | Negative | 243.0334 | 0.50 | unknown | 0       | 282775  | 454903  | 189865  | 394283  | 262076  | 550804  | 372840  | 140446   | 192539  | 763894  | 407972  | 315034  | 520184  | 0       | 204100  | 273599  | 186563  | 346525  |         |
| fpHILIC | Positive | 130.0608 | 2.51 | unknown | 248649  | 246867  | 148517  | 267696  | 276779  | 450523  | 283411  | 159172  | 558473   | 198718  | 336977  | 432976  | 407910  | 281766  | 329123  | 535937  | 311183  | 183267  | 261929  |         |
| EIC     | Negative | 241.1439 | 3.24 | unknown | 112268  | 113249  | 91688   | 89083   | 120891  | 114290  | 118467  | 97684   | 112377   | 105577  | 110055  | 118109  | 103980  | 100600  | 132375  | 153934  | 109766  | 0       | 123643  |         |
| EIC     | Negative | 569.3659 | 5.62 | unknown | 1554370 | 2600049 | 1617061 | 1767795 | 2405183 | 3173852 | 2248569 | 2049628 | 2038309  | 1295033 | 1944056 | 1964418 | 2466315 | 2190293 | 2561541 | 2075987 | 2172656 | 1172410 | 2047520 |         |
| fpHILIC | Positive | 129.0657 | 2.57 | unknown | 1100822 | 448137  | 922473  | 1157077 | 981530  | 881008  | 840109  | 736810  | 1217876  | 1335094 | 744766  | 677640  | 698080  | 750931  | 764058  | 716691  | 1091812 | 1108603 | 628688  |         |
| fpHILIC | Positive | 638.3359 | 0.40 | unknown | 854881  | 1221673 | 858487  | 949492  | 1007456 | 1176613 | 882492  | 1233060 | 2091222  | 881799  | 958706  | 933027  | 1286261 | 1271474 | 580799  | 883539  | 963448  | 816608  | 1066065 |         |
| EIC     | Negative | 633.5094 | 6.43 | unknown | 4057194 | 5682982 | 3123209 | 7211298 | 6190308 | 4068446 | 4977802 | 5073348 | 7439062  | 2369934 | 2321529 | 2756146 | 4354600 | 2545044 | 1920969 | 2326202 | 3407727 | 3343091 | 3491278 |         |
| fpHILIC | Positive | 249.1069 | 1.80 | unknown | 451535  | 1262769 | 1101538 | 1636933 | 1214465 | 1528489 | 1397251 | 1214520 | 1560159  | 1398955 | 1441500 | 1243128 | 1667228 | 1035206 | 1255753 | 1414913 | 1167956 | 1167640 | 1039707 |         |
| EIC     | Negative | 379.1561 | 6.46 | unknown | 494880  | 958146  | 541296  | 923630  | 703204  | 601879  | 5056334 | 6390586 | 449452   | 680686  | 494526  | 781703  | 559226  | 788591  | 606385  | 668768  | 572382  | 600683  | 539373  |         |
| EIC     | Negative | 381.2296 | 0.79 | unknown | 189668  | 177579  | 216739  | 599489  | 316770  | 762789  | 327054  | 1182752 | 155104   | 202365  | 296129  | 223126  | 121361  | 117401  | 667105  | 292507  | 214117  | 1135282 | 269574  |         |
| EIC     | Negative | 301.2656 | 5.59 | unknown | 412514  | 29991   | 157690  | 114936  | 332243  | 453641  | 172146  | 218340  | 147011   | 202365  | 296129  | 223126  | 121361  | 117401  | 667105  | 292507  | 214117  | 1135282 | 269574  |         |
| EIC     | Negative | 402.2225 | 1.99 | unknown | 0       | 136315  | 0       | 0       | 123743  | 183073  | 216827  | 0       | 182195   | 0       | 145650  | 155445  | 80880   | 89755   | 123679  | 145874  | 128612  | 0       | 96612   |         |
| EIC     | Negative | 506.3231 | 5.17 | unknown | 582616  | 573592  | 505182  | 530532  | 596862  | 772424  | 721332  | 578978  | 627209   | 502373  | 742289  | 585799  | 571053  | 595489  | 670204  | 627600  | 6562694 | 477688  | 567035  |         |
| EIC     | Negative | 602.3390 | 3.73 | unknown | 159780  | 761606  | 247640  | 286868  | 637390  | 480487  | 527974  | 372236  | 1010599  | 257389  | 465473  | 282920  | 537359  | 866171  | 428435  | 776921  | 596731  | 264554  | 392141  |         |
| EIC     | Negative | 251.1292 | 1.99 | unknown | 0       | 239153  | 0       | 0       | 233078  | 300708  | 204131  | 0       | 261387   | 0       | 224500  | 235147  | 253776  | 183563  | 176204  | 322564  | 255027  | 0       | 164535  |         |
| EIC     | Negative | 357.2523 | 2.15 | unknown | 398925  | 757464  | 447464  | 669771  | 653242  | 655366  | 750298  | 628321  | 634791   | 650368  | 614418  | 650899  | 527385  | 622930  | 619935  | 556400  | 633131  | 480380  | 557545  |         |
| fpHILIC | Negative | 301.2173 | 0.38 | unknown | 2187440 | 4995062 | 3595959 | 4644469 | 5399841 | 2842588 | 4747932 | 2777947 | 12655842 | 2473651 | 2799136 | 2472343 | 5474768 | 2512716 | 2104977 | 4047261 | 4331247 | 2519334 | 2511284 |         |
| EIC     | Negative | 430.9688 | 0.55 | unknown | 170111  | 261436  | 325113  | 298251  | 253791  | 193115  | 323480  | 514834  | 335711   | 189923  | 294074  | 301424  | 326903  | 54546   | 245897  | 256075  | 348594  | 400334  | 159022  |         |
| EIC     | Negative | 509.3487 | 1.94 | unknown | 0       | 195873  | 0       | 0       | 376622  | 76434   | 346337  | 0       | 230732   | 0       | 103604  | 162835  | 79503   | 130617  | 267928  | 258588  | 137306  | 0       | 151393  |         |
| EIC     | Negative | 522.8085 | 6.49 | unknown | 1524403 | 2020791 | 1723769 | 1847741 | 2677131 | 1642823 | 1861441 | 2198421 | 1720120  | 1328664 | 1891777 | 1815489 | 1910067 | 1415573 | 1482796 | 1626803 | 2305937 | 2592496 | 2009566 |         |
| EIC     | Negative | 473.2830 | 3.70 | unknown | 0       | 0       | 61002   | 0       | 24594   | 636532  | 0       | 452775  | 0        | 37512   | 10653   | 21411   | 11196   | 23718   | 20636   | 24059   | 0       | 96499   | 19678   |         |
| EIC     | Negative | 443.8600 | 1.34 | unknown | 12462   | 72679   | 0       | 0       | 59332   | 85151   | 73986   | 0       | 99238    | 0       | 67727   | 56888   | 80603   | 77869   | 61782   | 80123   | 56226   | 0       | 48353   |         |
| EIC     | Negative | 316.1224 | 1.97 | unknown | 0       | 290890  | 0       | 0       | 231161  | 204161  | 190988  | 0       | 634927   | 0       | 234938  | 240770  | 557728  | 165296  | 224722  | 692761  | 242631  | 0       | 69264   |         |
| EIC     | Negative | 497.3065 | 5.57 | unknown | 434912  | 411910  | 411735  | 321683  | 423232  | 433920  | 421820  | 503850  | 313839   | 398357  | 324836  | 249756  | 258459  | 274249  | 294364  | 258343  | 357611  | 406064  | 351939  |         |
| EIC     | Negative | 323.1842 | 4.08 | unknown | 3349607 | 3073628 | 3879343 | 7289798 | 4856024 | 3938474 | 5306632 | 4857357 | 8686171  | 6242639 | 4696922 | 6044049 | 5654808 | 1784792 | 2603589 | 5144051 | 5028383 | 6486756 | 2242031 |         |
| EIC     | Negative | 564.2695 | 1.63 | unknown | 0       | 32764   | 0       | 0       | 29521   | 234786  | 304354  | 0       | 240875   | 0       | 239979  | 287019  | 323230  | 29298   | 36154   | 0       | 39222   | 0       | 259263  |         |
| fpHILIC | Positive | 168.0766 | 3.17 | unknown | 357916  | 183522  | 201166  | 135576  | 189600  | 875576  | 408030  | 163830  | 193444   | 145486  | 167513  | 247491  | 185844  | 213762  | 175366  | 622585  | 307071  | 240819  | 297760  |         |
| EIC     | Negative | 247.1552 | 0.97 | unknown | 19262   | 13711   | 62219   | 10018   | 54262   | 11338   | 28172   | 58994   | 17164    | 16476   | 28905   | 54962   | 15984   | 13166   | 16174   | 23102   | 17910   | 9572    | 17082   |         |
| fpHILIC | Negative | 197.0819 | 2.78 | unknown | 447877  | 425269  | 434112  | 1953924 | 834613  | 1040550 | 1406233 | 815441  | 1771238  | 1104798 | 1113650 | 1517206 | 1736445 | 169889  | 490470  | 1994650 | 724258  | 722046  | 237010  |         |
| EIC     | Negative | 312.2264 | 3.08 | unknown | 165309  | 99608   | 146156  | 160853  | 145109  | 136907  | 186853  | 146071  | 184154   | 1061194 | 1061194 | 103512  | 96897   | 77328   | 72699   | 124694  | 131710  | 117334  | 0       |         |
| fpHILIC | Negative | 213.0227 | 0.38 | unknown | 1622968 | 975157  | 2650580 | 1834539 | 2056719 | 4427563 | 2284377 | 2644766 | 1189675  | 1796103 | 1536001 | 1959338 | 2138834 | 1657221 | 1475813 | 1692824 | 1798205 | 1569405 | 5684729 |         |
| EIC     | Negative | 383.2553 | 1.58 | unknown | 800983  | 1004920 | 666726  | 700190  | 969618  | 968311  | 946243  | 744172  | 983411   | 780079  | 956091  | 951284  | 1100666 | 916095  | 922515  | 972559  | 974630  | 550699  | 948474  |         |
| EIC     | Negative | 321.1689 | 3.43 | unknown | 2818558 | 2579776 | 2995099 | 6668811 | 4271056 | 3293595 | 4095156 | 4537305 | 5770246  | 4618405 | 3343717 | 5293397 | 4607333 | 1563065 | 2012797 | 3954610 | 3721753 | 5421596 | 1938416 |         |
| fpHILIC | Positive | 602.1880 | 3.15 | unknown | 929431  | 935928  | 997919  | 858202  | 941609  | 1044439 | 977232  | 1196585 | 1004238  | 1027437 | 137805  | 1004238 | 1027437 | 880318  | 834912  | 894710  | 823706  | 830759  | 1079802 |         |
| EIC     | Negative | 301.0726 | 2.33 | unknown | 39668   | 141875  | 100285  | 0       | 98805   | 77146   | 133837  | 122107  | 40795    | 0       | 94215   | 0       | 16648   | 15022   | 58696   | 290177  | 0       | 0       | 53779   |         |
| EIC     | Negative | 330.2077 | 3.98 | unknown | 436695  | 267487  | 433686  | 382485  | 444811  | 299226  | 415131  | 459575  | 376505   | 368547  | 306759  | 321992  | 292883  | 280839  | 312684  | 321412  | 293954  | 370211  | 264195  |         |
| EIC     | Negative | 324.2186 | 4.00 | unknown | 171073  | 178813  | 137540  | 111428  | 176802  | 145969  | 168310  | 200800  | 133501   | 154017  | 143520  | 124971  | 133804  | 114826  | 161963  | 126957  | 164106  | 183198  | 152312  |         |
| EIC     | Negative | 619.0206 | 0.55 | unknown | 66997   | 283992  | 203584  | 242612  | 187742  | 140020  | 280697  | 687981  | 268982   | 121668  | 271599  | 294899  | 307274  | 47985   | 190796  | 158506  | 351906  | 358814  | 90323   |         |
| EIC     | Negative | 423.3495 | 6.72 | unknown | 83574   | 127566  | 169761  | 137128  | 232169  | 742469  | 137365  | 132026  | 96843    | 147008  | 157847  | 218115  | 81736   | 70636   | 123798  | 129394  | 0       | 266823  | 134548  |         |
| EIC     | Negative | 581.3654 | 4.34 | unknown | 990224  | 1784120 | 707576  | 581369  | 837487  | 1691545 | 727778  | 1621992 | 985798   | 1493364 | 871659  | 2611196 | 887788  | 812837  | 824343  | 868137  | 1529281 | 1478209 | 784398  |         |
| fpHILIC | Negative | 383.0997 | 3.32 | unknown | 451573  | 230826  | 257563  | 319054  | 335638  | 523284  | 2199    |         |          |         |         |         |         |         |         |         |         |         |         |         |

|         |          |          |      |         |           |           |           |           |           |           |           |           |           |           |           |           |           |           |           |           |           |           |           |
|---------|----------|----------|------|---------|-----------|-----------|-----------|-----------|-----------|-----------|-----------|-----------|-----------|-----------|-----------|-----------|-----------|-----------|-----------|-----------|-----------|-----------|-----------|
| EIC     | Negative | 300.2626 | 5.59 | unknown | 3545022   | 416905    | 1385387   | 825175    | 2742888   | 3606904   | 1386978   | 1906266   | 1128087   | 506975    | 643317    | 418974    | 452202    | 607476    | 214534    | 407795    | 486860    | 876697    | 533685    |
| EIC     | Negative | 291.0368 | 1.59 | unknown | 383855    | 827493    | 75855     | 55036     | 1056563   | 1929961   | 1020317   | 89595     | 365620    | 54711     | 862726    | 165041    | 73536     | 36956     | 460031    | 567975    | 54099     | 45521     | 42446     |
| EIC     | Negative | 429.1956 | 1.77 | unknown | 168048    | 123210    | 126828    | 0         | 563273    | 38421     | 299928    | 178479    | 93357     | 65604     | 70552     | 121603    | 134396    | 144597    | 209569    | 0         | 115457    | 0         | 615470    |
| fpHILIC | Positive | 249.1514 | 2.46 | unknown | 486541    | 305470    | 336460    | 1051141   | 297025    | 415111    | 518610    | 288430    | 1657247   | 495303    | 509240    | 470445    | 493720    | 109253    | 239148    | 735893    | 245243    | 480698    | 237699    |
| fpHILIC | Positive | 548.2982 | 0.40 | unknown | 408550    | 478618    | 224445    | 268881    | 561132    | 757549    | 471481    | 507418    | 4158072   | 135858    | 338465    | 609499    | 875223    | 862597    | 306883    | 418444    | 381832    | 485224    | 527501    |
| EIC     | Negative | 299.2591 | 5.59 | unknown | 107852944 | 1954890   | 6935775   | 3952005   | 13590901  | 17969868  | 6970958   | 9717642   | 5652751   | 2853229   | 3100761   | 1969007   | 2242045   | 2974110   | 1409563   | 2184621   | 2561464   | 4365512   | 2567200   |
| fpHILIC | Negative | 191.0566 | 2.94 | unknown | 50555     | 180438    | 99370     | 361827    | 293790    | 193822    | 15058769  | 265362    | 187445    | 113344    | 40967     | 69371     | 76959     | 191104    | 63304     | 169599    | 790164    | 422433    | 132382    |
| fpHILIC | Negative | 131.0596 | 0.49 | unknown | 2015014   | 1315599   | 1316183   | 1672666   | 2214389   | 2297034   | 1885818   | 995647    | 2091430   | 1787495   | 1910629   | 2273986   | 1348751   | 842080    | 2160962   | 1598714   | 1071853   | 1357161   | 975460    |
| fpHILIC | Negative | 160.0981 | 2.31 | unknown | 358959    | 307407    | 418509    | 575424    | 325379    | 450475    | 448133    | 346970    | 712498    | 359535    | 441464    | 452185    | 543407    | 187714    | 267631    | 634308    | 2811754   | 357475    | 281820    |
| fpHILIC | Negative | 152.0294 | 2.48 | unknown | 2715577   | 1532931   | 1737705   | 543494    | 1830380   | 2446486   | 1601239   | 960388    | 1994208   | 1098338   | 80278     | 0         | 1602501   | 3472449   | 0         | 67926     | 2540269   | 351226    | 116734    |
| EIC     | Negative | 308.1598 | 3.00 | unknown | 201279    | 126358    | 140490    | 104175    | 156266    | 182823    | 155653    | 161405    | 135201    | 145658    | 131905    | 133846    | 113827    | 87307     | 124957    | 125321    | 21722     | 116622    | 91784     |
| EIC     | Negative | 310.2108 | 3.68 | unknown | 204307    | 192851    | 165860    | 316445    | 259928    | 166597    | 288133    | 249588    | 364794    | 214779    | 148690    | 207560    | 173881    | 156748    | 157552    | 204194    | 238827    | 204885    | 195576    |
| fpHILIC | Positive | 134.0639 | 2.86 | unknown | 776651    | 393674    | 466193    | 608000    | 635291    | 977532    | 601601    | 397845    | 555886    | 459720    | 486825    | 543743    | 457449    | 601420    | 1038757   | 526158    | 491785    | 511100    | 294450    |
| EIC     | Negative | 634.3347 | 4.17 | unknown | 2368520   | 2955800   | 2530424   | 2214730   | 2697809   | 2740611   | 2985458   | 2585531   | 3089480   | 2251161   | 2631872   | 2616052   | 2866481   | 2960897   | 2639975   | 2839619   | 2519585   | 2256977   | 2500108   |
| fpHILIC | Positive | 248.1487 | 2.46 | unknown | 4057309   | 2260916   | 2876578   | 8978147   | 2752974   | 3563200   | 3687251   | 2534627   | 12953754  | 3802728   | 3921356   | 3596028   | 4147721   | 1130765   | 1889564   | 6448228   | 2374494   | 4172708   | 1863218   |
| EIC     | Negative | 411.2255 | 3.14 | unknown | 0         | 50331     | 23764     | 14663     | 0         | 0         | 374621    | 0         | 190769    | 0         | 0         | 15710     | 0         | 0         | 0         | 28423     | 16113     | 0         | 0         |
| EIC     | Negative | 406.1895 | 4.08 | unknown | 118081    | 95664     | 97351     | 199306    | 138293    | 134108    | 161152    | 140510    | 191809    | 172245    | 134978    | 170218    | 167150    | 50438     | 81102     | 159557    | 151418    | 187952    | 68974     |
| EIC     | Negative | 295.1544 | 2.85 | unknown | 1894611   | 1118567   | 1157028   | 2137799   | 1834281   | 1487975   | 1741141   | 1787073   | 1803227   | 1188658   | 1825686   | 1588849   | 793275    | 872936    | 1370041   | 1473631   | 2615182   | 810411    | 0         |
| EIC     | Negative | 432.3194 | 4.17 | unknown | 112888    | 80894     | 138508    | 106414    | 100132    | 147655    | 119441    | 183730    | 97050     | 103318    | 108090    | 111102    | 84679     | 104707    | 110080    | 94316     | 106220    | 180828    | 62776     |
| EIC     | Negative | 303.0877 | 1.96 | unknown | 0         | 0         | 0         | 0         | 160526    | 96666     | 0         | 0         | 105754    | 0         | 0         | 124505    | 82495     | 0         | 131214    | 124611    | 15085     | 0         | 0         |
| fpHILIC | Positive | 796.5815 | 0.44 | unknown | 955955    | 1193986   | 808262    | 1069377   | 1242498   | 1190109   | 1009887   | 1152882   | 902580    | 892519    | 858947    | 937517    | 858659    | 1018262   | 933146    | 909492    | 1234287   | 952393    | 949773    |
| EIC     | Negative | 243.1965 | 3.59 | unknown | 1048239   | 314895    | 571965    | 543702    | 850042    | 1055424   | 512581    | 885865    | 548761    | 345951    | 370251    | 337571    | 321441    | 397217    | 250804    | 101607    | 362735    | 568221    | 367077    |
| fpHILIC | Negative | 821.5733 | 0.44 | unknown | 1459053   | 1364261   | 1257458   | 1119257   | 1484598   | 1157921   | 1089656   | 1209811   | 1632923   | 1243494   | 1368322   | 1559266   | 1251095   | 1327677   | 1511329   | 1049237   | 1502355   | 1055670   | 1323109   |
| EIC     | Negative | 580.3623 | 5.40 | unknown | 164405787 | 167785930 | 169021492 | 155175970 | 166586720 | 185259651 | 171487030 | 172462465 | 160323384 | 149057615 | 174945315 | 179454923 | 172978005 | 163447155 | 170214195 | 160831664 | 173732745 | 159809650 | 180156772 |
| fpHILIC | Negative | 264.1088 | 2.31 | unknown | 415266    | 350970    | 489405    | 644485    | 356322    | 532288    | 533214    | 404774    | 791315    | 404119    | 535315    | 543043    | 556745    | 196900    | 311455    | 729877    | 347599    | 477665    | 347732    |
| EIC     | Negative | 580.2681 | 3.98 | unknown | 129562    | 300437    | 94581     | 130382    | 289026    | 173479    | 168633    | 124352    | 602194    | 100783    | 149166    | 95238     | 152159    | 351239    | 152905    | 602194    | 251903    | 0         | 166460    |
| EIC     | Negative | 494.2596 | 1.98 | unknown | 321719    | 306143    | 446497    | 278646    | 206719    | 410921    | 346150    | 647815    | 466440    | 268132    | 289640    | 295619    | 290869    | 963832    | 430934    | 163220    | 322443    | 283159    | 314863    |
| EIC     | Negative | 266.1400 | 2.17 | unknown | 702665    | 1579514   | 487707    | 1015619   | 1016497   | 1022558   | 971945    | 847874    | 5502216   | 756146    | 1021133   | 997999    | 1776384   | 1547067   | 1121999   | 3043772   | 1898254   | 872236    | 638787    |
| EIC     | Negative | 356.1904 | 4.11 | unknown | 865537    | 942725    | 552358    | 1835942   | 1194219   | 1165803   | 1674605   | 899255    | 1666227   | 1004161   | 948887    | 1325119   | 1536203   | 428503    | 899948    | 1839784   | 1442433   | 1136490   | 661767    |
| EIC     | Negative | 601.3347 | 3.73 | unknown | 647443    | 3140014   | 803628    | 1138985   | 2520637   | 1806199   | 2170778   | 1251588   | 4252529   | 919915    | 1806408   | 1100333   | 2195464   | 3569080   | 1553926   | 3096294   | 2495184   | 924062    | 1587027   |
| fpHILIC | Negative | 249.1857 | 0.38 | unknown | 866605    | 1144756   | 1800622   | 4189845   | 1738177   | 1197448   | 2091835   | 2973043   | 3434432   | 1727242   | 1028409   | 1984000   | 1975744   | 792752    | 710856    | 1179101   | 2291891   | 2351164   | 1113872   |
| EIC     | Negative | 587.3582 | 4.08 | unknown | 0         | 0         | 80233     | 355998    | 158300    | 111746    | 160634    | 148418    | 326769    | 210862    | 121437    | 210066    | 188471    | 0         | 20245     | 158307    | 156972    | 275828    | 15282     |
| EIC     | Negative | 261.0744 | 2.09 | unknown | 166728    | 322395    | 0         | 36368     | 305347    | 298812    | 325794    | 200216    | 322802    | 1599100   | 309191    | 34816     | 171306    | 223013    | 287838    | 346279    | 91062     | 35793     | 260965    |
| fpHILIC | Negative | 303.2336 | 0.37 | unknown | 38868348  | 73059488  | 48898488  | 77960808  | 68095424  | 71616920  | 82647336  | 52972260  | 87542496  | 45988124  | 55008484  | 77274912  | 69511088  | 43888116  | 58164776  | 55731528  | 78535176  | 58446548  | 63663628  |
| EIC     | Negative | 537.0172 | 0.55 | unknown | 158305    | 498512    | 433541    | 467294    | 374910    | 1169722   | 670266    | 511431    | 1169722   | 420283    | 485499    | 526487    | 559054    | 204657    | 385679    | 314986    | 610608    | 638799    | 187314    |
| fpHILIC | Positive | 805.6237 | 0.46 | unknown | 535795    | 270106    | 358359    | 424067    | 446085    | 506788    | 473373    | 480432    | 331846    | 601124    | 343284    | 479514    | 262145    | 259055    | 418838    | 375472    | 398758    | 467007    | 528766    |
| EIC     | Negative | 453.2821 | 1.83 | unknown | 143661    | 3192022   | 0         | 0         | 0         | 0         | 10382678  | 2373001   | 1914239   | 0         | 0         | 114681    | 221086    | 0         | 200029    | 168596    | 164644    | 0         | 424817    |
| fpHILIC | Negative | 187.0030 | 2.48 | unknown | 1214483   | 595461    | 787223    | 207493    | 822598    | 957110    | 739306    | 444546    | 775673    | 957967    | 0         | 0         | 804795    | 1608548   | 0         | 0         | 1005026   | 186285    | 70126     |
| EIC     | Negative | 512.9719 | 0.55 | unknown | 131561    | 208812    | 222343    | 231690    | 174345    | 140056    | 214375    | 450577    | 228243    | 114244    | 215539    | 249484    | 256161    | 20515     | 191365    | 204432    | 255920    | 300666    | 110874    |
| EIC     | Negative | 600.3314 | 3.73 | unknown | 1923634   | 9414003   | 2441818   | 3417572   | 7398003   | 5299382   | 6345658   | 3792002   | 12522052  | 2696545   | 5272640   | 3324457   | 6624765   | 10680561  | 4696836   | 9263756   | 7167185   | 2634721   | 4713979   |
| EIC     | Negative | 278.1843 | 3.46 | unknown | 0         | 207118    | 0         | 0         | 0         | 0         | 0         | 0         | 0         | 0         | 0         | 179163    | 0         | 0         | 0         | 0         | 0         | 0         | 219622    |
| EIC     | Negative | 321.1743 | 3.45 | unknown | 2597461   | 0         | 0         | 0         | 4030478   | 0         | 0         | 0         | 0         | 0         | 0         | 0         | 0         | 124707    | 1880615   | 210805    | 189315    | 0         | 263402    |
| EIC     | Negative | 240.1604 | 2.91 | unknown | 0         | 0         | 0         | 0         | 0         | 782240    | 0         | 0         | 0         | 0         | 0         | 345885    | 0         | 0         | 440864    | 0         | 0         | 0         | 0         |
| EIC     | Negative | 325.1946 | 4.65 | unknown | 0         | 0         | 0         | 0         | 0         | 0         | 0         | 0         | 273995    | 314494    | 0         | 0         | 0         | 0         | 0         | 183778    | 0         | 0         | 0         |
| EIC     | Negative | 555.3682 | 4.17 | unknown | 0         | 0         | 0         | 0         | 0         | 0         | 691106    | 0         | 0         | 389098    | 72426     | 0         | 647625    | 664396    | 548083    | 0         | 0         | 0         | 0         |
| EIC     | Negative | 555.3682 | 4.24 | unknown | 0         | 0         | 0         | 0         | 0         | 0         | 406377    | 0         | 0         | 0         | 0         | 0         | 338170    | 336639    | 343094    | 0         | 0         | 0         | 0         |
| EIC     | Negative | 609.3879 | 4.04 | unknown | 0         | 0         | 0         | 0         | 0         | 0         | 0         | 0         | 108465    | 266054    | 0         | 0         | 21983     | 0         | 101150    | 0         | 0         | 0         | 0         |
| EIC     | Negative | 415.2113 | 6.04 | unknown | 0         | 0         | 0         | 0         | 0         | 440666    | 0         | 0         | 0         | 648175    | 44703     | 0         | 639418    | 46038     | 49134     | 0         | 0         | 0         | 380821    |
| EIC     | Negative | 229.0538 | 1.91 | unknown | 0         | 345241    | 0         | 0         | 302212    | 208546    | 326385    | 0         | 351235    | 0         | 441292    | 356165    | 319026    | 365948    | 264684    | 362509    | 274330    | 0         | 218886    |
| fpHILIC | Positive | 171.0760 | 1.60 | unknown | 134457    | 270519    | 920691    | 0         | 1484855   | 0         | 243027    | 0         | 2694365   | 1087995   | 0         | 0         | 1918735   | 1606922   | 0         | 0         | 1375496   | 962429    | 1328720   |
| fpHILIC | Positive | 204.1336 | 2.61 | unknown | 941148    | 855701    | 668396    | 883022    | 995093    | 2081116   | 966128    | 784396    | 1262859   | 1030893   | 1608998   | 1360256   |           |           |           |           |           |           |           |



|         |          |          |      |         |          |          |          |          |           |          |          |          |          |          |          |          |          |          |          |          |          |          |          |
|---------|----------|----------|------|---------|----------|----------|----------|----------|-----------|----------|----------|----------|----------|----------|----------|----------|----------|----------|----------|----------|----------|----------|----------|
| EIC     | Negative | 328.2820 | 4.45 | unknown | 2264003  | 2161904  | 2058505  | 2262709  | 2275172   | 2181542  | 2167777  | 2227375  | 2178363  | 2164088  | 2254487  | 2291895  | 2223291  | 1907753  | 2066365  | 2190814  | 2136381  | 2365425  | 2018738  |
| fpHILIC | Negative | 361.1251 | 3.34 | unknown | 782067   | 675652   | 831387   | 948227   | 794417    | 919268   | 920736   | 841116   | 866218   | 844425   | 922949   | 712881   | 913164   | 445338   | 717910   | 606519   | 881518   | 700901   | 615532   |
| fpHILIC | Positive | 141.0626 | 1.84 | unknown | 10848311 | 5165684  | 5810342  | 7830783  | 8280533   | 13117774 | 8818261  | 7997405  | 7188232  | 6809500  | 6786098  | 6772473  | 5939592  | 4882633  | 7440140  | 11650471 | 6532104  | 7197580  | 5468628  |
| EIC     | Negative | 489.2834 | 2.13 | unknown | 2742446  | 5060488  | 2297304  | 3379176  | 4673415   | 4347905  | 4919498  | 2982642  | 3657036  | 1309567  | 114029   | 120658   | 241655   | 24286    | 28791    | 285373   | 28514    | 941109   | 146166   |
| fpHILIC | Positive | 314.1231 | 3.89 | unknown | 670574   | 52051    | 0        | 0        | 285848    | 1115191  | 258819   | 242879   | 0        | 0        | 0        | 40811    | 0        | 258223   | 0        | 62946    | 0        | 322667   | 0        |
| fpHILIC | Negative | 344.1535 | 0.37 | unknown | 754729   | 996053   | 546709   | 1668259  | 626789    | 1052121  | 1003221  | 717997   | 2439471  | 561956   | 997742   | 1360703  | 1359591  | 717729   | 1175321  | 2320701  | 788694   | 423777   | 645220   |
| EIC     | Negative | 581.3655 | 5.40 | unknown | 51853750 | 52855053 | 53320517 | 49250268 | 532599488 | 58724173 | 54429519 | 54314852 | 50538363 | 47115723 | 55686310 | 56762243 | 54735441 | 52046034 | 53478183 | 50830622 | 54877312 | 50721316 | 57129381 |
| fpHILIC | Negative | 611.1453 | 4.51 | unknown | 559387   | 244321   | 125375   | 270778   | 462671    | 735830   | 308046   | 238411   | 410469   | 217687   | 211845   | 390772   | 275834   | 351162   | 329200   | 381178   | 472528   | 362014   | 489241   |
| EIC     | Negative | 255.1138 | 1.46 | unknown | 0        | 395289   | 0        | 0        | 345076    | 355019   | 360056   | 0        | 303929   | 0        | 373220   | 420038   | 361902   | 195596   | 250254   | 431733   | 283356   | 0        | 242412   |
| EIC     | Negative | 315.2282 | 1.61 | unknown | 474496   | 405246   | 139353   | 0        | 390498    | 355776   | 622793   | 260581   | 395290   | 267966   | 364904   | 346399   | 442021   | 353235   | 369370   | 442593   | 368196   | 110848   | 603524   |
| fpHILIC | Positive | 173.0206 | 3.86 | unknown | 934874   | 997581   | 624468   | 686452   | 960144    | 1486161  | 874650   | 470991   | 744088   | 493448   | 685727   | 689335   | 636806   | 571049   | 754836   | 998917   | 850850   | 703636   | 838853   |
| EIC     | Negative | 226.1891 | 5.57 | unknown | 450663   | 695604   | 1841256  | 3054334  | 1732640   | 862137   | 1385671  | 2199806  | 2957908  | 924264   | 478878   | 837817   | 1349869  | 316589   | 200881   | 1028260  | 1113769  | 1532239  | 459056   |
| EIC     | Negative | 370.1685 | 2.21 | unknown | 67679    | 148148   | 64348    | 25505    | 121324    | 132034   | 118041   | 66610    | 118169   | 42321    | 107421   | 101354   | 107856   | 93172    | 134354   | 165459   | 106298   | 47087    | 93017    |
| EIC     | Negative | 415.1975 | 1.45 | unknown | 0        | 520137   | 0        | 0        | 412205    | 563670   | 335536   | 0        | 524522   | 0        | 345409   | 452902   | 121077   | 257662   | 645503   | 344739   | 0        | 186582   | 0        |
| EIC     | Negative | 612.3316 | 4.26 | unknown | 324638   | 609198   | 310116   | 364579   | 468223    | 573059   | 449647   | 401545   | 551379   | 394023   | 597667   | 473553   | 484278   | 466373   | 454523   | 559991   | 585210   | 329174   | 481322   |
| EIC     | Negative | 327.2181 | 2.10 | unknown | 152418   | 68899    | 113919   | 62314    | 53991     | 110531   | 1305398  | 59148    | 99148    | 53153    | 50946    | 93104    | 86043    | 69787    | 52203    | 264368   | 82007    | 60671    | 749621   |
| EIC     | Negative | 333.1314 | 3.23 | unknown | 0        | 76376    | 163310   | 124128   | 276388    | 233179   | 131098   | 203566   | 164089   | 265881   | 103350   | 116940   | 193759   | 154911   | 99193    | 58493    | 128518   | 149058   | 164126   |
| EIC     | Negative | 487.1900 | 1.43 | unknown | 0        | 10451    | 0        | 0        | 99005     | 101334   | 46217    | 0        | 80251    | 0        | 24181    | 24752    | 78727    | 67673    | 81308    | 42664    | 41082    | 0        | 69574    |
| fpHILIC | Negative | 229.0538 | 0.37 | unknown | 633482   | 1044695  | 646910   | 216966   | 596009    | 693002   | 947002   | 673241   | 1063745  | 542555   | 936371   | 845708   | 667074   | 1135248  | 683040   | 730178   | 774736   | 598327   | 592651   |
| EIC     | Negative | 552.2736 | 2.62 | unknown | 0        | 450140   | 0        | 0        | 402638    | 50287    | 4594     | 305334   | 401967   | 0        | 78428    | 385866   | 492024   | 409172   | 496620   | 81287    | 516017   | 0        | 87455    |
| fpHILIC | Positive | 711.0675 | 2.94 | unknown | 4659810  | 4794773  | 4649117  | 4850314  | 4854071   | 4844498  | 5135498  | 4540428  | 5479438  | 5035383  | 5092741  | 5431904  | 5364586  | 4473423  | 4752016  | 5226715  | 4688497  | 4784358  | 4905318  |
| fpHILIC | Negative | 82.9542  | 0.95 | unknown | 3190927  | 5884038  | 9807159  | 13411159 | 12332045  | 72513504 | 7751550  | 6625725  | 10283822 | 21767332 | 10717677 | 35815624 | 70673536 | 36444096 | 9588975  | 13851277 | 11477009 | 25417052 | 16854372 |
| fpHILIC | Positive | 427.0948 | 4.29 | unknown | 1191189  | 1612359  | 477766   | 863345   | 1692050   | 2275476  | 1790083  | 664279   | 1869072  | 774075   | 1440845  | 1880609  | 1666582  | 1707561  | 1858801  | 1717089  | 1710037  | 773106   | 1558291  |
| EIC     | Negative | 552.5000 | 6.35 | unknown | 419006   | 453461   | 443369   | 623111   | 512088    | 584611   | 630543   | 566692   | 456089   | 213055   | 230624   | 304359   | 334999   | 274292   | 224609   | 2588150  | 295605   | 287340   | 267416   |
| EIC     | Negative | 227.1285 | 1.20 | unknown | 97272    | 99590    | 116953   | 135425   | 105773    | 82837    | 134996   | 130715   | 137727   | 87548    | 71029    | 110793   | 125749   | 64883    | 74401    | 86153    | 101096   | 130492   | 100013   |
| EIC     | Negative | 462.9630 | 3.75 | unknown | 946419   | 1344295  | 842851   | 1075622  | 1178596   | 1350878  | 1178712  | 930952   | 1397661  | 771247   | 1187305  | 979836   | 1065588  | 1008930  | 1205746  | 1200190  | 1018042  | 936937   | 920342   |
| fpHILIC | Negative | 102.0561 | 2.58 | unknown | 872482   | 398869   | 820329   | 1058869  | 827304    | 985553   | 772092   | 714349   | 924309   | 956880   | 629290   | 584261   | 623782   | 585661   | 646963   | 656684   | 896219   | 813286   | 539480   |
| fpHILIC | Negative | 164.0644 | 2.45 | unknown | 666041   | 871046   | 530418   | 324888   | 1012178   | 958312   | 1209538  | 501028   | 1191532  | 496206   | 1181932  | 1182918  | 1172634  | 929676   | 923582   | 1001644  | 989708   | 651286   | 1042632  |
| EIC     | Negative | 648.3173 | 1.94 | unknown | 0        | 183974   | 0        | 0        | 202511    | 222556   | 267615   | 0        | 181276   | 0        | 17324    | 242727   | 143745   | 162991   | 182594   | 191422   | 205664   | 0        | 221711   |
| fpHILIC | Positive | 373.1799 | 3.72 | unknown | 4276864  | 3604983  | 3932783  | 3565204  | 4314885   | 4266759  | 4519786  | 3657245  | 3109401  | 3275847  | 3552808  | 3542490  | 3173350  | 2540342  | 4038480  | 3803150  | 3150555  | 3639507  | 2897155  |
| EIC     | Negative | 499.9343 | 4.20 | unknown | 403012   | 529427   | 359084   | 431086   | 490870    | 495029   | 472028   | 379589   | 482789   | 340358   | 449417   | 412270   | 439300   | 470987   | 446643   | 461647   | 414057   | 364897   | 387614   |
| EIC     | Negative | 243.1603 | 2.96 | unknown | 231287   | 217858   | 394743   | 329754   | 215965    | 252820   | 359658   | 549575   | 335994   | 378674   | 165115   | 355932   | 336670   | 158016   | 164093   | 248185   | 272637   | 350153   | 210397   |
| EIC     | Negative | 317.1635 | 1.87 | unknown | 171895   | 86285    | 0        | 0        | 112018    | 166458   | 82283    | 0        | 432159   | 0        | 118909   | 132232   | 171855   | 130139   | 142156   | 127252   | 101666   | 0        | 57738    |
| EIC     | Negative | 256.1637 | 3.03 | unknown | 78781    | 87418    | 100448   | 76343    | 57482     | 68350    | 113805   | 169529   | 108173   | 115617   | 53716    | 93134    | 78609    | 55502    | 45285    | 60396    | 75129    | 97534    | 63772    |
| fpHILIC | Negative | 84.9513  | 0.95 | unknown | 1274905  | 2134074  | 3539754  | 4505086  | 4287086   | 25684282 | 2731812  | 2204958  | 4642504  | 7490390  | 3596014  | 12904656 | 25296660 | 12902903 | 3240653  | 4895754  | 3901222  | 8892982  | 5885043  |
| EIC     | Negative | 461.2902 | 2.12 | unknown | 55654    | 24456    | 68001    | 102086   | 59617     | 70951    | 24463    | 155487   | 96624    | 97909    | 31759    | 42646    | 49912    | 92938    | 62453    | 29834    | 43611    | 152843   | 37793    |
| fpHILIC | Negative | 177.0411 | 0.95 | unknown | 318800   | 284612   | 260858   | 431251   | 362494    | 338046   | 398567   | 245500   | 445038   | 670736   | 403742   | 315697   | 263473   | 261094   | 384164   | 506872   | 291883   | 261697   | 241933   |
| fpHILIC | Positive | 104.0709 | 2.57 | unknown | 59679132 | 34281272 | 52371348 | 81902936 | 59924872  | 79993992 | 57030504 | 58425608 | 62400652 | 48414148 | 34315392 | 37925816 | 36201380 | 30238928 | 34569156 | 44572024 | 39291648 | 43208116 | 44657628 |
| EIC     | Negative | 594.9786 | 0.55 | unknown | 54780    | 160334   | 183757   | 146461   | 131499    | 169723   | 324586   | 481210   | 169923   | 581240   | 176922   | 183384   | 179144   | 0        | 122119   | 119972   | 223360   | 226514   | 567820   |
| fpHILIC | Positive | 105.4070 | 2.57 | unknown | 2712785  | 1481819  | 2456009  | 3695168  | 2834150   | 3793448  | 2762434  | 2582275  | 2671824  | 2307060  | 1575189  | 1768593  | 1504330  | 1374602  | 1519373  | 1938941  | 1884491  | 1942344  | 2042516  |
| EIC     | Negative | 475.2672 | 2.25 | unknown | 370793   | 61314    | 452332   | 0        | 322183    | 22101    | 199030   | 1855695  | 227797   | 0        | 0        | 0        | 0        | 0        | 0        | 0        | 0        | 0        | 27199    |
| EIC     | Negative | 353.2314 | 4.39 | unknown | 132334   | 60800    | 412832   | 329496   | 270818    | 157499   | 239467   | 515163   | 356414   | 242632   | 95225    | 165349   | 218793   | 91362    | 47887    | 187135   | 178046   | 315945   | 109584   |
| EIC     | Negative | 382.9622 | 0.57 | unknown | 14158    | 0        | 38618    | 68619    | 10167     | 13172    | 19652    | 22533    | 176383   | 0        | 14708    | 9208     | 48049    | 0        | 7934     | 62571    | 0        | 23008    | 15527    |
| EIC     | Negative | 567.3174 | 2.81 | unknown | 1246740  | 575339   | 1213340  | 453738   | 1540801   | 705933   | 1622879  | 757517   | 231884   | 265758   | 104414   | 47193    | 86875    | 0        | 14960    | 33459    | 16551    | 92729    | 206468   |
| EIC     | Negative | 379.2478 | 6.20 | unknown | 272753   | 249957   | 93288    | 83701    | 155225    | 221015   | 166577   | 1040825  | 144028   | 408925   | 144028   | 242070   | 208021   | 187156   | 194256   | 183463   | 177005   | 123588   | 237393   |
| EIC     | Negative | 324.1876 | 4.08 | unknown | 626104   | 552977   | 711801   | 1309782  | 893890    | 713023   | 948856   | 895910   | 1181117  | 1054408  | 829652   | 1046924  | 980919   | 320720   | 479266   | 928315   | 936094   | 1131983  | 392819   |
| EIC     | Negative | 374.3713 | 0.55 | unknown | 53491    | 125246   | 133341   | 174642   | 118100    | 68698    | 151042   | 263714   | 136627   | 87937    | 129661   | 144271   | 143013   | 67561    | 123796   | 98760    | 161736   | 183353   | 69565    |
| EIC     | Negative | 225.1857 | 3.47 | unknown | 218855   | 217451   | 253755   | 546019   | 299365    | 377140   | 347401   | 314967   | 486285   | 238555   | 271275   | 314890   | 287559   | 104031   | 178030   | 302572   | 194945   | 230005   | 159892   |
| fpHILIC | Positive | 142.0690 | 1.84 | unknown | 703144   | 325540   | 384614   | 461241   | 516728    | 889946   | 530897   | 489802   | 446853   | 424485   | 395417   | 421829   | 357347   | 303143   | 475536   | 719685   | 397165   |          |          |

|         |          |          |      |         |          |          |          |           |          |           |           |          |           |          |          |          |          |          |          |          |          |          |          |
|---------|----------|----------|------|---------|----------|----------|----------|-----------|----------|-----------|-----------|----------|-----------|----------|----------|----------|----------|----------|----------|----------|----------|----------|----------|
| EIC     | Negative | 602.3467 | 4.14 | unknown | 193096   | 534655   | 294220   | 260761    | 389216   | 444047    | 432444    | 360702   | 461220    | 255086   | 475466   | 339401   | 405774   | 517827   | 335628   | 489640   | 409552   | 223530   | 356693   |
| EIC     | Negative | 227.1066 | 1.56 | unknown | 63481    | 121492   | 56077    | 0         | 126258   | 139629    | 141305    | 48811    | 0         | 47650    | 118714   | 107955   | 100449   | 80806    | 143746   | 71243    | 100857   | 0        | 126417   |
| EIC     | Negative | 454.2901 | 1.82 | unknown | 4033873  | 887470   | 1622645  | 0         | 2722819  | 4800875   | 2873631   | 776939   | 656267    | 0        | 38013    | 40743    | 76578    | 63208    | 65223    | 48965    | 33578    | 0        | 122193   |
| EIC     | Negative | 360.0064 | 1.19 | unknown | 166543   | 171876   | 139349   | 129530    | 159935   | 184677    | 187899    | 141684   | 144992    | 145724   | 169966   | 161028   | 140463   | 157832   | 158285   | 139997   | 160915   | 126150   | 166951   |
| EIC     | Negative | 600.3314 | 3.90 | unknown | 10299395 | 36786816 | 11115332 | 13623679  | 28152415 | 18869326  | 23773838  | 15680550 | 43890716  | 11237700 | 19306115 | 13236980 | 25918955 | 37759168 | 16433892 | 26583596 | 26100522 | 11984872 | 18793115 |
| EIC     | Negative | 357.2589 | 2.01 | unknown | 5052043  | 12557884 | 4643284  | 367245    | 12713129 | 12517393  | 12943660  | 3973445  | 9820778   | 4174520  | 11950117 | 11812527 | 10170425 | 9325685  | 11530209 | 11781635 | 11561091 | 3587872  | 11524728 |
| EIC     | Negative | 496.3049 | 5.57 | unknown | 1600706  | 1500709  | 1585424  | 1424082   | 1607282  | 1656964   | 1490057   | 1959071  | 1357273   | 1425155  | 1296587  | 999372   | 1144806  | 1182406  | 1194055  | 1086645  | 1425804  | 1527697  | 1305472  |
| fpHILIC | Negative | 511.4732 | 0.38 | unknown | 268878   | 798055   | 1294969  | 232192    | 1088091  | 884657    | 1380061   | 1558978  | 1781079   | 642844   | 319848   | 723987   | 1026075  | 285275   | 268956   | 654052   | 1092669  | 1082934  | 451575   |
| EIC     | Negative | 420.9404 | 0.67 | unknown | 11766    | 59039    | 55718    | 55284     | 44786    | 29097     | 52160     | 114107   | 54065     | 32951    | 46321    | 61492    | 66229    | 5069     | 38063    | 43577    | 66970    | 76034    | 24615    |
| EIC     | Negative | 356.2472 | 2.06 | unknown | 2793733  | 3791437  | 2559609  | 2235857   | 3657704  | 3698427   | 3738355   | 2456239  | 3369418   | 2509254  | 3493033  | 3581914  | 3391603  | 3286313  | 3451518  | 3588392  | 3448338  | 2044934  | 3496574  |
| EIC     | Negative | 635.3419 | 2.65 | unknown | 0        | 75463    | 0        | 0         | 77959    | 81459     | 135667    | 0        | 72764     | 0        | 68559    | 90812    | 80141    | 77262    | 53136    | 82762    | 101535   | 0        | 120389   |
| EIC     | Negative | 540.3315 | 5.10 | unknown | 862636   | 1008367  | 896130   | 898921    | 960611   | 981583    | 959340    | 915933   | 904281    | 923543   | 957049   | 8993213  | 916835   | 965588   | 946876   | 923252   | 901619   | 898081   | 936641   |
| fpHILIC | Negative | 144.0666 | 0.95 | unknown | 2038691  | 1462775  | 1487917  | 7173666   | 2654207  | 4517630   | 3493536   | 2154787  | 6275974   | 2236695  | 2578878  | 2873847  | 3370614  | 878705   | 1696735  | 5079379  | 2451859  | 1172695  | 901628   |
| EIC     | Negative | 581.3572 | 4.35 | unknown | 1542826  | 416518   | 1714933  | 1487986   | 1518091  | 1688697   | 1632695   | 1663069  | 1659003   | 1950500  | 1817697  | 1604589  | 1598117  | 1902802  | 1499710  | 1527847  | 1635430  | 1481282  | 1871740  |
| fpHILIC | Negative | 101.0608 | 0.49 | unknown | 666174   | 543475   | 439593   | 583127    | 662028   | 847327    | 702515    | 357208   | 870394    | 628426   | 734715   | 976761   | 511829   | 329086   | 928107   | 720303   | 454701   | 367301   | 426730   |
| fpHILIC | Positive | 267.0082 | 1.61 | unknown | 122278   | 288821   | 0        | 451863    | 782503   | 441296    | 533462    | 0        | 737643    | 0        | 327425   | 562038   | 661310   | 710749   | 560339   | 519294   | 0        | 636790   | 0        |
| EIC     | Negative | 535.2500 | 1.30 | unknown | 176729   | 98689    | 0        | 0         | 176744   | 171579    | 292456    | 0        | 150769    | 249664   | 150851   | 125949   | 53156    | 98536    | 125528   | 114376   | 154722   | 0        | 97569    |
| EIC     | Negative | 338.1743 | 4.08 | unknown | 89182    | 65486    | 102668   | 270248    | 132179   | 112703    | 168436    | 149043   | 135917    | 162849   | 133597   | 179919   | 167819   | 7629     | 0        | 152583   | 136406   | 183909   | 0        |
| EIC     | Negative | 298.1723 | 3.38 | unknown | 77605    | 131078   | 156937   | 423202    | 247835   | 160615    | 232955    | 221807   | 307514    | 166541   | 129279   | 254108   | 185155   | 73033    | 61489    | 130986   | 138561   | 303560   | 84446    |
| EIC     | Negative | 249.0380 | 0.89 | unknown | 75944    | 93689    | 29642    | 26302     | 130217   | 99817     | 67534     | 63289    | 204555    | 63829    | 5580     | 70148    | 73964    | 77028    | 170882   | 37813    | 54760    | 170747   | 0        |
| EIC     | Negative | 325.2658 | 4.73 | unknown | 561210   | 591779   | 493203   | 638334    | 599729   | 596478    | 560120    | 566766   | 574524    | 558684   | 580763   | 531958   | 536072   | 511846   | 550500   | 580076   | 526356   | 555564   | 546466   |
| EIC     | Negative | 437.2868 | 5.74 | unknown | 1166510  | 1392593  | 1152380  | 1238128   | 1365567  | 1651062   | 1058181   | 1214800  | 1287702   | 921592   | 1096088  | 1062305  | 1083251  | 1249549  | 960043   | 1087205  | 1205142  | 1032306  | 1233438  |
| fpHILIC | Positive | 764.5318 | 0.38 | unknown | 346781   | 359035   | 269986   | 301127    | 388279   | 201850    | 243317    | 443490   | 561216    | 260126   | 210524   | 241988   | 213674   | 507802   | 209717   | 170254   | 287058   | 229190   | 206069   |
| EIC     | Positive | 601.3247 | 3.90 | unknown | 3536528  | 12347248 | 3744896  | 4678882   | 9548784  | 6281375   | 7972347   | 5199631  | 14634124  | 3737860  | 6437402  | 4412593  | 8640206  | 12529423 | 5515038  | 8907029  | 2608138  | 4040625  | 6405299  |
| EIC     | Negative | 552.3320 | 2.72 | unknown | 577033   | 0        | 0        | 0         | 337928   | 0         | 438952    | 0        | 281993    | 0        | 451759   | 306647   | 296516   | 0        | 0        | 0        | 285966   | 0        | 0        |
| EIC     | Negative | 328.2932 | 6.65 | unknown | 158617   | 203671   | 233384   | 477960    | 273290   | 360382    | 420960    | 265550   | 246275    | 249836   | 387044   | 385040   | 272195   | 289850   | 256978   | 276220   | 320580   | 159808   | 0        |
| EIC     | Negative | 498.9309 | 4.20 | unknown | 4129565  | 5522543  | 3790409  | 4708942   | 5107177  | 5400461   | 4756296   | 5034688  | 3652856   | 4933178  | 4566893  | 5052048  | 4806941  | 4948635  | 4830183  | 4368433  | 3777879  | 4096476  | 0        |
| EIC     | Negative | 554.2740 | 1.77 | unknown | 809318   | 795605   | 745976   | 493145    | 551321   | 789081    | 1070132   | 1095786  | 619656    | 1177988  | 793055   | 1011015  | 723184   | 868985   | 491407   | 558112   | 631741   | 0        | 1020510  |
| fpHILIC | Negative | 327.2330 | 0.37 | unknown | 32716214 | 73663672 | 40384904 | 107444320 | 65692220 | 50759880  | 72651832  | 54733804 | 107106444 | 51203184 | 42856004 | 46553164 | 73541752 | 28933730 | 43375664 | 64539172 | 61572868 | 53455152 | 43472300 |
| fpHILIC | Positive | 156.0420 | 2.30 | unknown | 0        | 564953   | 557269   | 625268    | 606334   | 628207    | 548851    | 802720   | 240189    | 513560   | 453806   | 439732   | 465547   | 365669   | 548662   | 243853   | 130447   | 516955   | 179825   |
| EIC     | Negative | 420.1147 | 1.67 | unknown | 0        | 91764    | 0        | 96738     | 87160    | 109965    | 88556     | 0        | 142759    | 40237    | 88896    | 75031    | 125736   | 17093    | 69499    | 95094    | 68522    | 62822    | 39596    |
| EIC     | Negative | 363.2540 | 3.11 | unknown | 420065   | 95211    | 197688   | 27867     | 278074   | 106902    | 556948    | 79543    | 407798    | 17748    | 21949    | 18825    | 24804    | 23492    | 22532    | 13348    | 17994    | 17399    | 26785    |
| fpHILIC | Negative | 155.0098 | 1.97 | unknown | 1914468  | 1604034  | 1676728  | 2023921   | 2038056  | 2902587   | 2554059   | 2016012  | 1282826   | 1866582  | 1783512  | 1838974  | 1676489  | 1899891  | 2203912  | 1666795  | 2282886  | 2040576  | 1839645  |
| EIC     | Negative | 630.3782 | 4.27 | unknown | 0        | 0        | 0        | 0         | 0        | 246355    | 184175    | 0        | 0         | 0        | 0        | 0        | 0        | 0        | 0        | 0        | 0        | 0        | 0        |
| fpHILIC | Positive | 215.1390 | 1.66 | unknown | 0        | 259436   | 204916   | 406882    | 226245   | 574410    | 159051    | 244755   | 317016    | 301133   | 340206   | 199444   | 198926   | 256112   | 341248   | 225436   | 193461   | 167681   | 0        |
| fpHILIC | Negative | 289.0688 | 2.77 | unknown | 278918   | 134209   | 160904   | 238940    | 299043   | 749101    | 215165    | 125314   | 100105    | 248586   | 295269   | 403522   | 121625   | 0        | 190513   | 146737   | 175410   | 191286   | 97761    |
| fpHILIC | Negative | 130.0590 | 0.49 | unknown | 21108112 | 16502648 | 16286704 | 16856042  | 20212794 | 24157010  | 20249252  | 10863980 | 25279060  | 19086146 | 20232368 | 24014904 | 15641117 | 10733741 | 25054636 | 17858858 | 12921660 | 11761450 | 12188534 |
| EIC     | Negative | 297.1688 | 3.38 | unknown | 523210   | 867835   | 1100935  | 2671085   | 1628236  | 997515    | 1412932   | 1534321  | 1955034   | 1096139  | 793576   | 1352498  | 1142253  | 465218   | 373235   | 912797   | 955651   | 1962504  | 510088   |
| fpHILIC | Positive | 127.0500 | 2.74 | unknown | 1476074  | 945387   | 1127197  | 1399874   | 992050   | 1677308   | 1236365   | 1880755  | 1371388   | 1241210  | 893881   | 1294636  | 1115399  | 1196435  | 835098   | 1565417  | 1438289  | 1517482  | 107480   |
| EIC     | Negative | 476.2718 | 1.82 | unknown | 692953   | 208024   | 230978   | 0         | 469759   | 744730    | 543095    | 34899    | 133042    | 0        | 6739     | 0        | 16025    | 7098     | 15612    | 9844     | 16207    | 0        | 35403    |
| EIC     | Negative | 516.2472 | 1.03 | unknown | 0        | 105455   | 0        | 0         | 69494    | 101367    | 139818    | 0        | 70721     | 89238    | 95271    | 128960   | 92043    | 95251    | 79219    | 71048    | 81699    | 0        | 108917   |
| fpHILIC | Negative | 192.0666 | 0.61 | unknown | 17130956 | 20580484 | 9008398  | 6275455   | 24873676 | 51069000  | 21091468  | 9284894  | 11339575  | 1396118  | 3978957  | 3820710  | 2383723  | 3574037  | 2858755  | 4592358  | 3897922  | 1852020  | 3351004  |
| EIC     | Negative | 251.1269 | 3.23 | unknown | 377956   | 581093   | 1626476  | 1626476   | 959742   | 559323    | 867818    | 736534   | 1117950   | 956400   | 495122   | 821916   | 712471   | 430276   | 351193   | 572606   | 706390   | 742279   | 541290   |
| EIC     | Negative | 381.1648 | 3.46 | unknown | 187038   | 64750    | 144086   | 91322     | 118616   | 130858    | 162825    | 273644   | 59975     | 167450   | 70641    | 102728   | 88645    | 83178    | 102569   | 104799   | 104801   | 221087   | 63101    |
| EIC     | Negative | 602.3382 | 3.90 | unknown | 804096   | 2858097  | 879758   | 1022739   | 2129067  | 1452834   | 1777923   | 1231952  | 3287505   | 926276   | 1604663  | 1059522  | 1997369  | 2791377  | 1342976  | 2077322  | 2054345  | 1035913  | 1439404  |
| EIC     | Negative | 540.2733 | 3.10 | unknown | 485054   | 483838   | 263908   | 372672    | 458975   | 586661    | 388188    | 324652   | 813360    | 356850   | 355807   | 468015   | 385000   | 330485   | 517332   | 511814   | 562810   | 124906   | 524172   |
| EIC     | Negative | 283.1030 | 0.57 | unknown | 145736   | 74489    | 308605   | 557961    | 156416   | 131193    | 192198    | 183864   | 1185292   | 775811   | 161249   | 133021   | 304171   | 57129    | 72367    | 369732   | 100741   | 285731   | 162144   |
| EIC     | Negative | 580.3623 | 5.17 | unknown | 7599180  | 9749969  | 81691353 | 7376012   | 87580101 | 106620533 | 105893560 | 84366132 | 78079349  | 67927230 | 99042912 | 99250348 | 91175401 | 96785742 | 98787692 | 89224813 | 9464968  | 72919833 | 94974114 |
| fpHILIC | Positive | 115.0636 | 1.80 | unknown | 1747090  | 1407393  | 1418193  | 1674235   | 1599030  | 2088228   | 1814173   | 1405467  | 1802035   | 1520780  | 1602412  |          |          |          |          |          |          |          |          |

|         |          |          |      |         |           |           |           |           |           |           |           |           |           |           |           |           |           |           |           |           |           |           |           |
|---------|----------|----------|------|---------|-----------|-----------|-----------|-----------|-----------|-----------|-----------|-----------|-----------|-----------|-----------|-----------|-----------|-----------|-----------|-----------|-----------|-----------|-----------|
| EIC     | Negative | 328.2360 | 6.41 | unknown | 66443948  | 111560428 | 92281229  | 149884830 | 109969306 | 99632978  | 123468896 | 111028148 | 126869670 | 88049030  | 85779607  | 93168312  | 110545863 | 62591953  | 74818460  | 97712562  | 106570536 | 91240134  | 73916854  |
| fpHILIC | Positive | 233.1579 | 1.83 | unknown | 1345933   | 2256905   | 1709549   | 1677123   | 1745295   | 3095813   | 2370206   | 1568914   | 1582392   | 1070840   | 2136833   | 2065942   | 1860629   | 3151748   | 1556308   | 2257825   | 1695897   | 1151990   | 1615629   |
| fpHILIC | Positive | 190.1630 | 4.65 | unknown | 1079502   | 523766    | 408501    | 935699    | 870535    | 892660    | 789419    | 626088    | 1112411   | 611417    | 670595    | 808396    | 829673    | 731270    | 1029787   | 875605    | 846375    | 557618    | 744041    |
| EIC     | Negative | 540.2736 | 3.44 | unknown | 211069    | 224657    | 80183     | 122827    | 177646    | 266551    | 155712    | 112080    | 349505    | 153964    | 138649    | 205092    | 137573    | 138397    | 199139    | 218148    | 257750    | 79396     | 241320    |
| EIC     | Negative | 529.3010 | 4.17 | unknown | 0         | 0         | 81566     | 0         | 0         | 0         | 0         | 0         | 391317    | 0         | 365574    | 0         | 0         | 0         | 0         | 0         | 0         | 345794    | 0         |
| EIC     | Negative | 608.9910 | 0.55 | unknown | 312023    | 1625031   | 1275242   | 1767896   | 1020568   | 857238    | 1415951   | 277886    | 1466309   | 465676    | 1416646   | 1770434   | 1762296   | 57220     | 947916    | 1034572   | 1680902   | 1768246   | 399357    |
| fpHILIC | Negative | 277.2172 | 0.38 | unknown | 12885396  | 18894370  | 27203476  | 41722568  | 26918814  | 17876900  | 24131362  | 26718798  | 3995308   | 18517540  | 14654418  | 19787326  | 23569852  | 11557058  | 14177434  | 15589179  | 21949066  | 21681624  | 16567714  |
| EIC     | Negative | 358.2080 | 5.81 | unknown | 116527    | 311260    | 186000    | 696781    | 388827    | 181094    | 269829    | 340510    | 660787    | 175690    | 202702    | 162239    | 314521    | 134509    | 140358    | 236376    | 356031    | 191329    | 106343    |
| fpHILIC | Negative | 239.0165 | 3.87 | unknown | 947505    | 2528010   | 473297    | 731700    | 1507339   | 2784722   | 2646857   | 623941    | 3484681   | 495123    | 2737188   | 1883571   | 3619751   | 1982680   | 3321791   | 1897944   | 2378304   | 678400    | 1953505   |
| EIC     | Negative | 570.3687 | 5.50 | unknown | 286052    | 391821    | 279649    | 316670    | 359928    | 401384    | 343291    | 328330    | 296100    | 243458    | 348330    | 352359    | 329471    | 343004    | 314517    | 290450    | 318233    | 249698    | 352189    |
| EIC     | Negative | 321.2061 | 2.88 | unknown | 406750    | 140031    | 128347    | 130418    | 218690    | 433958    | 303451    | 253300    | 103959    | 32762     | 37771     | 26825     | 26936     | 24778     | 33550     | 31630     | 32965     | 32525     | 27814     |
| fpHILIC | Negative | 628.3253 | 0.54 | unknown | 6855852   | 13574518  | 62471125  | 71244412  | 10887976  | 11446018  | 11086338  | 6612682   | 12953935  | 6938522   | 12529831  | 9889809   | 11320655  | 9039957   | 9499987   | 12551374  | 11994434  | 5430054   | 12199889  |
| EIC     | Negative | 291.0368 | 2.17 | unknown | 52424     | 97671     | 126492    | 31296     | 68537     | 181334    | 119005    | 41223     | 24380     | 30857     | 235033    | 64129     | 0         | 0         | 84212     | 117707    | 0         | 0         | 0         |
| EIC     | Negative | 388.8248 | 0.52 | unknown | 186787    | 117700    | 162441    | 151059    | 253329    | 143513    | 177440    | 151057    | 128797    | 188040    | 157191    | 119267    | 157976    | 370378    | 187658    | 112188    | 118662    | 147375    | 153664    |
| fpHILIC | Negative | 115.0402 | 0.44 | unknown | 2107383   | 3224022   | 5602420   | 5431533   | 2974323   | 3661563   | 5413852   | 4704476   | 4224624   | 5532155   | 4313629   | 4353094   | 4487072   | 2876362   | 2873756   | 3806124   | 4662326   | 3834824   | 3730652   |
| EIC     | Negative | 315.1249 | 2.05 | unknown | 0         | 80683     | 83988     | 0         | 135309    | 118040    | 170059    | 0         | 13025     | 0         | 36069     | 0         | 0         | 0         | 183342    | 112221    | 104851    | 0         | 90008     |
| fpHILIC | Positive | 729.5887 | 0.47 | unknown | 425370    | 470084    | 361749    | 376669    | 552283    | 348905    | 411124    | 319058    | 626799    | 442577    | 442745    | 345062    | 358863    | 501505    | 438841    | 461189    | 522826    | 416716    | 396942    |
| EIC     | Negative | 271.2281 | 4.66 | unknown | 3598476   | 2972024   | 10692136  | 10551480  | 8108157   | 5196468   | 6417696   | 12152642  | 9454848   | 6228982   | 3305599   | 4966363   | 4404419   | 4193839   | 2037044   | 3855850   | 4748938   | 7609810   | 4986933   |
| EIC     | Negative | 473.2831 | 6.83 | unknown | 95598     | 107435    | 99283     | 111502    | 94067     | 108153    | 148721    | 118914    | 81282     | 58771     | 87851     | 62946     | 74990     | 65768     | 23042     | 62709     | 26662     | 52300     | 29113     |
| EIC     | Negative | 253.1446 | 1.92 | unknown | 0         | 283785    | 0         | 0         | 217801    | 123149    | 279356    | 0         | 379870    | 0         | 211603    | 175612    | 303036    | 172511    | 199573    | 269816    | 218973    | 0         | 140667    |
| EIC     | Negative | 280.1197 | 3.22 | unknown | 61765     | 36352     | 118975    | 51205     | 134782    | 58082     | 71496     | 137847    | 50952     | 85098     | 53114     | 14289     | 9896      | 34545     | 148085    | 9137      | 46908     | 87420     | 32075     |
| fpHILIC | Positive | 104.1073 | 4.07 | unknown | 285827552 | 193999568 | 214999376 | 180055290 | 203876448 | 259605792 | 238174832 | 216200768 | 204526016 | 182276992 | 144960384 | 183762304 | 153304512 | 138076864 | 201599920 | 215368480 | 166120896 | 211435216 | 195510384 |
| EIC     | Negative | 391.1513 | 0.74 | unknown | 174857    | 131289    | 88614     | 94049     | 131017    | 118826    | 132216    | 150434    | 145494    | 123551    | 108290    | 133159    | 120095    | 105847    | 138919    | 119360    | 129632    | 105595    | 132366    |
| EIC     | Negative | 523.2661 | 4.03 | unknown | 114848    | 534604    | 121301    | 203406    | 361404    | 411645    | 306130    | 163735    | 437028    | 187740    | 378876    | 322564    | 388746    | 508075    | 369759    | 272712    | 378679    | 22285     | 370020    |
| EIC     | Negative | 538.2452 | 1.27 | unknown | 371649    | 371695    | 241507    | 105141    | 397748    | 498853    | 647239    | 45742     | 326525    | 497942    | 311986    | 499104    | 430645    | 299289    | 255804    | 374899    | 371936    | 0         | 383117    |
| EIC     | Negative | 357.2051 | 5.81 | unknown | 527571    | 1365528   | 857419    | 3050116   | 1492626   | 815253    | 1232093   | 1396851   | 2918604   | 928865    | 795287    | 687869    | 1489241   | 604807    | 726661    | 1094695   | 1418671   | 817965    | 517470    |
| EIC     | Negative | 315.2328 | 6.39 | unknown | 1747166   | 6351818   | 2859393   | 6464028   | 4665169   | 4456841   | 5755302   | 2595327   | 15787898  | 3949779   | 4525350   | 2385556   | 5532704   | 3475289   | 2581644   | 4661508   | 4637287   | 2810698   | 3480185   |
| EIC     | Negative | 415.1975 | 1.87 | unknown | 701856    | 2440865   | 0         | 0         | 1560410   | 731604    | 1945265   | 0         | 4586470   | 0         | 1215242   | 1070837   | 1775141   | 1402198   | 1936410   | 3365738   | 1223937   | 0         | 1003219   |
| EIC     | Negative | 379.2482 | 3.12 | unknown | 141268    | 68975     | 160935    | 85447     | 82483     | 94311     | 121211    | 169075    | 175702    | 312619    | 90851     | 95178     | 98831     | 118977    | 92098     | 137507    | 101317    | 136336    | 103999    |
| EIC     | Negative | 605.3660 | 4.80 | unknown | 6723319   | 14600435  | 10286573  | 7845575   | 12207987  | 14648471  | 13598401  | 9079758   | 9364243   | 8133968   | 15171725  | 11328466  | 12305378  | 11233473  | 11221435  | 12306022  | 13928386  | 6192010   | 11997372  |
| EIC     | Negative | 381.2627 | 5.59 | unknown | 1190229   | 136199    | 456823    | 201813    | 753101    | 1037296   | 404462    | 582722    | 317164    | 185818    | 204832    | 162495    | 147611    | 201492    | 107656    | 127204    | 163595    | 259956    | 164188    |
| fpHILIC | Positive | 362.1192 | 2.08 | unknown | 593051    | 45244     | 201909    | 41586     | 297611    | 453535    | 230641    | 0         | 327565    | 0         | 0         | 0         | 279972    | 300494    | 0         | 0         | 346424    | 0         | 0         |
| EIC     | Negative | 231.1758 | 2.65 | unknown | 172040    | 228269    | 273393    | 245329    | 286970    | 197965    | 268480    | 348108    | 152678    | 261322    | 229527    | 186830    | 155733    | 177472    | 168671    | 138950    | 152902    | 366729    | 327024    |
| EIC     | Negative | 372.2401 | 1.87 | unknown | 133847    | 101810    | 0         | 0         | 131234    | 143036    | 129947    | 0         | 189991    | 0         | 121839    | 148659    | 127582    | 63762     | 58682     | 98673     | 96699     | 0         | 93823     |
| EIC     | Negative | 285.2075 | 3.47 | unknown | 0         | 102385    | 280577    | 182968    | 47511     | 193917    | 243952    | 341981    | 73910     | 227943    | 117400    | 168872    | 60474     | 110696    | 135769    | 69646     | 141394    | 268960    | 75789     |
| EIC     | Negative | 347.1870 | 2.44 | unknown | 584344    | 2090083   | 597294    | 883526    | 1179478   | 925309    | 2223605   | 1708344   | 1231203   | 891230    | 265827    | 2505859   | 2158591   | 1782644   | 2284116   | 2224883   | 1759130   | 288719    | 293194    |
| EIC     | Negative | 399.1701 | 4.08 | unknown | 198644    | 177090    | 220053    | 478854    | 300722    | 248506    | 307746    | 316832    | 415510    | 396883    | 328016    | 387167    | 335173    | 98577     | 153983    | 328574    | 324809    | 493120    | 191963    |
| EIC     | Negative | 310.0722 | 0.69 | unknown | 71472     | 5306      | 0         | 4064      | 0         | 11805     | 0         | 154765    | 73825     | 4147      | 15489     | 0         | 20289     | 74705     | 17510     | 31810     | 42933     | 24927     | 17031     |
| EIC     | Negative | 307.0315 | 1.26 | unknown | 461536    | 729079    | 70394     | 35853     | 846478    | 1040800   | 666251    | 28456     | 382904    | 506227    | 118317    | 51121     | 18429     | 311816    | 232860    | 42778     | 0         | 34982     | 0         |
| fpHILIC | Positive | 133.0730 | 2.45 | unknown | 554762    | 203135    | 584765    | 490164    | 337584    | 642005    | 200291    | 670821    | 1234712   | 472300    | 330369    | 730452    | 734674    | 746327    | 191005    | 465249    | 706464    | 412068    | 342070    |
| EIC     | Negative | 374.2572 | 1.81 | unknown | 1034407   | 1075520   | 962694    | 0         | 957634    | 1037986   | 1084294   | 790773    | 555871    | 979350    | 925296    | 1035985   | 973040    | 970480    | 1010710   | 1032182   | 0         | 976787    | 0         |
| EIC     | Negative | 241.1808 | 4.39 | unknown | 3745139   | 830441    | 2427949   | 3456933   | 3255855   | 4199601   | 2188552   | 3331216   | 2342939   | 2041783   | 1046609   | 1309703   | 1347810   | 659119    | 443874    | 954289    | 1277762   | 2786624   | 710648    |
| fpHILIC | Positive | 639.3408 | 0.40 | unknown | 349096    | 391444    | 405992    | 375074    | 338969    | 452474    | 364962    | 327132    | 326751    | 345747    | 475867    | 486026    | 398244    | 242918    | 443874    | 336245    | 398244    | 338723    | 401018    |
| EIC     | Negative | 296.1580 | 2.85 | unknown | 307760    | 190088    | 211035    | 301351    | 290276    | 237996    | 272123    | 250911    | 311801    | 311710    | 197169    | 298173    | 262671    | 125992    | 148142    | 210848    | 238859    | 406298    | 117611    |
| EIC     | Negative | 320.1566 | 4.90 | unknown | 78061     | 91453     | 0         | 0         | 191311    | 93345     | 21645     | 0         | 0         | 0         | 0         | 0         | 0         | 0         | 0         | 91493     | 0         | 0         | 0         |
| fpHILIC | Negative | 308.0982 | 3.20 | unknown | 652808    | 466331    | 532480    | 697371    | 850967    | 885741    | 645100    | 438788    | 615188    | 528460    | 639394    | 499291    | 501081    | 408719    | 533999    | 655381    | 545286    | 556551    | 610096    |
| fpHILIC | Positive | 259.1134 | 3.32 | unknown | 4899200   | 11222589  | 4979366   | 4387583   | 8001451   | 986221    | 11001331  | 4850632   | 956438    | 3544609   | 8611073   | 9931514   | 7432874   | 7259803   | 7361684   | 9877002   | 7881716   | 5285608   | 10226306  |
| fpHILIC | Positive | 544.3386 | 0.56 | unknown | 144401184 | 142307840 | 184467184 | 148212904 | 144076160 | 169291632 | 188346168 | 163894768 | 114308776 | 133892392 | 132433536 | 164431848 | 150639904 | 121547464 | 129724608 | 128941096 | 159466096 | 145421680 | 141910944 |
| EIC     | Negative | 594.3777 | 5.75 | unknown | 369661    | 470646    | 378707    | 302000    | 446076    | 549738    | 549037    | 460672    | 376442    | 239131    | 40704</   |           |           |           |           |           |           |           |           |

|         |          |          |      |         |           |           |           |           |           |           |           |           |           |           |           |           |           |           |           |           |           |           |           |
|---------|----------|----------|------|---------|-----------|-----------|-----------|-----------|-----------|-----------|-----------|-----------|-----------|-----------|-----------|-----------|-----------|-----------|-----------|-----------|-----------|-----------|-----------|
| EIC     | Negative | 304.1173 | 1.81 | unknown | 85763     | 51953     | 0         | 0         | 64131     | 144221    | 71100     | 0         | 35764     | 0         | 55680     | 89227     | 77382     | 40467     | 86668     | 79076     | 92634     | 0         | 38878     |
| fpHILIC | Negative | 305.0681 | 4.52 | unknown | 452090    | 238038    | 121176    | 205175    | 308904    | 558818    | 242259    | 198256    | 280659    | 178929    | 149419    | 307654    | 0         | 239925    | 225544    | 283970    | 385435    | 264157    | 354632    |
| fpHILIC | Positive | 114.0988 | 1.80 | unknown | 486195    | 423762    | 398617    | 403928    | 360775    | 541417    | 459563    | 361367    | 468025    | 384128    | 415236    | 442732    | 449934    | 306575    | 336823    | 459282    | 390133    | 334711    | 320500    |
| EIC     | Negative | 397.1551 | 3.43 | unknown | 159103    | 171402    | 197457    | 507408    | 277542    | 219963    | 274884    | 331640    | 396806    | 318553    | 281001    | 402340    | 328810    | 108649    | 151701    | 269630    | 269742    | 440039    | 138088    |
| fpHILIC | Negative | 310.1288 | 2.70 | unknown | 238550    | 262295    | 592104    | 164487    | 414588    | 275658    | 335000    | 421351    | 260142    | 312105    | 526849    | 369634    | 305562    | 432779    | 108528    | 277590    | 186660    | 156069    | 223477    |
| EIC     | Negative | 327.2907 | 6.65 | unknown | 743919    | 822423    | 1111322   | 2243462   | 1218435   | 1601832   | 1347830   | 1607366   | 1278177   | 1104917   | 1116639   | 1667153   | 1703491   | 949688    | 985368    | 1165443   | 1242882   | 1354002   | 772797    |
| EIC     | Negative | 500.2789 | 4.64 | unknown | 168351504 | 213584558 | 158801883 | 165319160 | 199871990 | 208721496 | 193056103 | 171062162 | 173252379 | 129589405 | 164398571 | 157099119 | 152766540 | 197209026 | 175662575 | 116630141 | 187964440 | 153523112 | 184786715 |
| EIC     | Negative | 442.0091 | 1.19 | unknown | 123164    | 126380    | 107881    | 97030     | 122166    | 131958    | 126470    | 101141    | 113173    | 112587    | 122442    | 121215    | 118792    | 119266    | 115339    | 102664    | 117913    | 90859     | 127083    |
| EIC     | Negative | 272.2315 | 4.66 | unknown | 605832    | 584911    | 1944406   | 1924343   | 1462117   | 917323    | 1050735   | 2254454   | 1739771   | 1095389   | 603854    | 938648    | 742561    | 692995    | 367452    | 668035    | 858140    | 1339821   | 637577    |
| EIC     | Negative | 269.1402 | 2.34 | unknown | 373823    | 207239    | 43374     | 88596     | 266542    | 213055    | 244372    | 130039    | 337145    | 127101    | 153117    | 49813     | 219984    | 95401     | 108075    | 199520    | 40817     | 89482     | 66925     |
| EIC     | Negative | 583.3811 | 5.40 | unknown | 0         | 0         | 0         | 1677999   | 0         | 1941029   | 0         | 1851288   | 0         | 1578695   | 0         | 0         | 1753281   | 0         | 1637309   | 0         | 0         | 0         | 0         |
| fpHILIC | Positive | 288.1915 | 2.29 | unknown | 541522    | 520765    | 447639    | 707175    | 652750    | 549538    | 522406    | 507350    | 569403    | 578660    | 400079    | 480352    | 676200    | 386746    | 231457    | 429252    | 467400    | 664984    | 434686    |
| fpHILIC | Negative | 841.5428 | 0.44 | unknown | 159392    | 325545    | 212724    | 140934    | 296993    | 287894    | 393963    | 150926    | 682797    | 209240    | 309231    | 317909    | 342951    | 328313    | 314225    | 346888    | 296925    | 89552     | 263056    |
| EIC     | Negative | 255.1604 | 1.94 | unknown | 66587     | 178223    | 0         | 0         | 165913    | 243452    | 165910    | 0         | 176297    | 0         | 176751    | 267665    | 283123    | 149141    | 203850    | 221641    | 151844    | 0         | 133382    |
| fpHILIC | Positive | 115.0697 | 1.80 | unknown | 6901747   | 5718647   | 5540251   | 6289859   | 5729195   | 7698963   | 6595799   | 5620990   | 6831304   | 5707622   | 6457380   | 6114718   | 6789690   | 5071783   | 5757405   | 6960401   | 5302193   | 5604775   | 5181598   |
| fpHILIC | Positive | 828.5493 | 0.43 | unknown | 73689     | 571508    | 260739    | 355594    | 515073    | 359054    | 456886    | 233947    | 571486    | 333424    | 382807    | 479583    | 606406    | 438967    | 395288    | 480529    | 401081    | 296303    | 414852    |
| EIC     | Negative | 604.3628 | 4.90 | unknown | 2957451   | 4221865   | 3724941   | 2610157   | 3645775   | 5377367   | 4301868   | 3845592   | 2291949   | 2393688   | 4108623   | 2963556   | 3107437   | 3317190   | 3454458   | 3039017   | 3594698   | 2182743   | 3522837   |
| EIC     | Negative | 438.2490 | 3.17 | unknown | 170336    | 161771    | 174617    | 172386    | 173363    | 174390    | 171191    | 173661    | 174390    | 167379    | 197536    | 177420    | 172450    | 1660357   | 170570    | 164859    | 169801    | 170035    | 170672    |
| EIC     | Negative | 269.1374 | 2.12 | unknown | 56412     | 77687     | 170117    | 0         | 132092    | 99819     | 0         | 314305    | 0         | 260615    | 0         | 0         | 44658     | 0         | 0         | 0         | 0         | 0         | 342216    |
| fpHILIC | Positive | 164.0731 | 2.73 | unknown | 690136    | 281391    | 242907    | 780470    | 496270    | 497328    | 472898    | 356533    | 801038    | 513178    | 423163    | 316833    | 395136    | 177116    | 320595    | 665274    | 323256    | 5211776   | 237955    |
| EIC     | Negative | 548.2644 | 1.28 | unknown | 66089     | 106343    | 0         | 0         | 90549     | 78378     | 131040    | 0         | 105854    | 72698     | 92148     | 86164     | 106287    | 75373     | 80363     | 87428     | 108762    | 0         | 118791    |
| fpHILIC | Negative | 233.9133 | 2.09 | unknown | 602298    | 1133172   | 585704    | 285520    | 602897    | 573751    | 1839105   | 965341    | 182451    | 383523    | 299802    | 1273739   | 834751    | 1293214   | 45991     | 535347    | 149815    | 366149    | 148708    |
| EIC     | Negative | 578.2732 | 1.87 | unknown | 458599    | 371055    | 0         | 0         | 318740    | 438013    | 683396    | 0         | 369718    | 0         | 416289    | 487249    | 431834    | 312444    | 347261    | 309864    | 419520    | 0         | 517522    |
| EIC     | Negative | 430.1989 | 1.41 | unknown | 0         | 353216    | 0         | 0         | 365834    | 26476     | 360433    | 0         | 139657    | 0         | 200355    | 144242    | 183975    | 115544    | 336399    | 286564    | 99693     | 0         | 71369     |
| EIC     | Negative | 263.1294 | 2.04 | unknown | 131546    | 145381    | 338867    | 94924     | 216768    | 270170    | 263427    | 249356    | 31833     | 171925    | 244342    | 220339    | 176162    | 105736    | 200039    | 154744    | 164719    | 97837     | 112350    |
| EIC     | Negative | 372.1855 | 2.64 | unknown | 71748     | 619744    | 147298    | 492565    | 584141    | 895942    | 647278    | 118445    | 403183    | 452875    | 567794    | 624742    | 561388    | 508294    | 663287    | 708325    | 515968    | 80960     | 437738    |
| EIC     | Negative | 464.3102 | 6.03 | unknown | 385896    | 549922    | 376222    | 462854    | 576841    | 590054    | 424469    | 400584    | 432106    | 110947    | 430715    | 435024    | 384227    | 428290    | 445437    | 396318    | 458807    | 365158    | 519323    |
| EIC     | Negative | 272.2314 | 5.12 | unknown | 121005    | 138165    | 315147    | 313783    | 236777    | 158297    | 210350    | 338311    | 270057    | 170947    | 711129    | 119859    | 179636    | 194135    | 66668     | 207045    | 144282    | 288458    | 119319    |
| EIC     | Negative | 522.2627 | 4.02 | unknown | 485434    | 1704906   | 408535    | 737581    | 1193830   | 1331869   | 943122    | 526827    | 1473935   | 556614    | 1312919   | 976495    | 1247422   | 1605223   | 1172245   | 951509    | 1295071   | 545122    | 1142122   |
| EIC     | Negative | 503.2995 | 4.45 | unknown | 0         | 59850     | 0         | 0         | 997073    | 0         | 0         | 0         | 598056    | 422724    | 0         | 609346    | 550788    | 0         | 0         | 60546     | 0         | 43120     | 696969    |
| EIC     | Negative | 607.3717 | 4.80 | unknown | 272870    | 516370    | 362956    | 267431    | 454458    | 520592    | 466683    | 320806    | 319535    | 296143    | 568595    | 400827    | 430288    | 398634    | 403963    | 419689    | 520513    | 227266    | 418124    |
| EIC     | Negative | 630.3782 | 4.93 | unknown | 0         | 695224    | 0         | 0         | 1602415   | 1107577   | 0         | 0         | 1052665   | 1406859   | 0         | 0         | 484867    | 0         | 529973    | 0         | 0         | 0         | 995969    |
| fpHILIC | Negative | 302.2201 | 0.38 | unknown | 379707    | 1181445   | 1027392   | 1395901   | 973454    | 583866    | 1141396   | 373775    | 3424782   | 720645    | 677629    | 644741    | 1173195   | 551082    | 630351    | 1059593   | 906988    | 710124    | 551581    |
| EIC     | Negative | 365.0326 | 2.04 | unknown | 324016    | 316427    | 487156    | 109417    | 182817    | 693960    | 990252    | 0         | 109638    | 265492    | 516579    | 253295    | 85308     | 156408    | 30425     | 272929    | 270329    | 134240    | 475336    |
| EIC     | Negative | 254.2203 | 6.42 | unknown | 19000073  | 27846856  | 53621314  | 59120330  | 42855439  | 32022594  | 42421449  | 50869456  | 60501767  | 33920239  | 25577959  | 35541974  | 41957820  | 21988831  | 19658806  | 35890008  | 39095290  | 14844635  | 19381106  |
| fpHILIC | Positive | 151.0477 | 3.46 | unknown | 554078    | 574961    | 594411    | 601187    | 597234    | 569675    | 695085    | 666418    | 563374    | 593104    | 620112    | 654578    | 653172    | 418603    | 547491    | 611029    | 638688    | 630211    | 0         |
| fpHILIC | Positive | 321.2012 | 2.30 | unknown | 5968768   | 4163284   | 7871962   | 10376188  | 5509790   | 6554985   | 7507921   | 8702761   | 7866764   | 5678904   | 4286457   | 4200576   | 5832563   | 2368789   | 4844713   | 5872572   | 2439492   | 6847630   | 2048633   |
| EIC     | Negative | 335.1536 | 3.43 | unknown | 287085    | 238545    | 333461    | 876588    | 446305    | 320145    | 437369    | 543776    | 657993    | 548344    | 339126    | 545660    | 493770    | 152798    | 199933    | 431157    | 384400    | 560450    | 169715    |
| EIC     | Negative | 322.1723 | 3.43 | unknown | 521296    | 473108    | 580448    | 1219833   | 688795    | 605638    | 730302    | 807539    | 1022418   | 803263    | 667699    | 956361    | 866287    | 282592    | 364628    | 710290    | 681407    | 1086491   | 356178    |
| EIC     | Negative | 387.0262 | 0.54 | unknown | 5298966   | 14012276  | 11737952  | 16002640  | 10039294  | 8288553   | 12550915  | 23312081  | 12187588  | 6186052   | 1119787   | 14301235  | 15468548  | 5762143   | 9104292   | 898676    | 1390880   | 15022746  | 5154523   |
| EIC     | Negative | 353.2002 | 5.50 | unknown | 2351757   | 1117471   | 1368252   | 1468766   | 2246094   | 856602    | 1182209   | 1333916   | 872961    | 1333916   | 1707518   | 749181    | 786005    | 648665    | 1344517   | 2108101   | 1494632   | 1195360   | 0         |
| EIC     | Negative | 299.2527 | 4.62 | unknown | 471116    | 193559    | 179274    | 312971    | 162858    | 308747    | 227882    | 1033953   | 189254    | 667962    | 408153    | 441347    | 463823    | 552145    | 201126    | 372204    | 497091    | 147456    | 388967    |
| EIC     | Negative | 392.2639 | 6.44 | unknown | 4547887   | 4187834   | 1327688   | 3485930   | 2792533   | 3903842   | 4874795   | 7117486   | 4904661   | 3151301   | 4029412   | 2059468   | 2833983   | 3408227   | 3298360   | 3312597   | 3333500   | 1982761   | 2212883   |
| EIC     | Negative | 501.2819 | 4.64 | unknown | 47290073  | 60593287  | 44499575  | 47176474  | 56577468  | 59609138  | 55405847  | 48348014  | 48543791  | 37465543  | 44606758  | 44916815  | 42935516  | 56390632  | 49639248  | 33269753  | 5320722   | 43916833  | 52565888  |
| EIC     | Negative | 300.2626 | 5.71 | unknown | 1019786   | 973594    | 2956000   | 2840350   | 2027478   | 1385296   | 2018703   | 3272635   | 2365274   | 1530572   | 924504    | 1188281   | 1330225   | 994904    | 498927    | 397925    | 1232801   | 2291723   | 987979    |
| EIC     | Negative | 375.2481 | 5.49 | unknown | 0         | 257592    | 25350     | 0         | 145454    | 0         | 239970    | 183934    | 275999    | 0         | 0         | 173156    | 0         | 0         | 0         | 210606    | 0         | 0         | 253704    |
| EIC     | Negative | 271.2282 | 5.12 | unknown | 718495    | 655073    | 1749804   | 1640711   | 1170037   | 936211    | 1091660   | 1861301   | 1507779   | 919312    | 657656    | 751234    | 867556    | 1032054   | 610696    | 955960    | 808725    | 1523470   | 820854    |
| EIC     | Negative | 231.2108 | 6.16 | unknown | 48026     | 45056     | 36418     | 336344    | 157971    | 17171     | 145308    | 177468    | 165935    | 60072     | 36826     | 130909    | 96320     | 0         | 144670    | 76619     | 171207    | 42914     | 0         |
| EIC     | Negative | 272.2314 | 4.22 | unknown | 304129    | 311874    | 917352    | 931698    | 703494    | 468071    | 555376    | 1096284   | 758703    | 458518    | 298979    | 364230    | 387641    | 432708    | 182266    | 376118    | 435332    | 679667    | 380202    |
| fpHILIC | Negative | 26       |      |         |           |           |           |           |           |           |           |           |           |           |           |           |           |           |           |           |           |           |           |



|         |          |          |      |         |          |          |          |          |          |          |          |          |          |          |          |          |          |          |          |          |          |          |         |
|---------|----------|----------|------|---------|----------|----------|----------|----------|----------|----------|----------|----------|----------|----------|----------|----------|----------|----------|----------|----------|----------|----------|---------|
| fpHILIC | Negative | 175.0441 | 3.81 | unknown | 340281   | 226858   | 226932   | 232029   | 203024   | 396261   | 151317   | 156305   | 705531   | 176119   | 181567   | 326443   | 214159   | 194523   | 181622   | 202523   | 225762   | 255035   | 193201  |
| fpHILIC | Positive | 87.0796  | 3.36 | unknown | 586463   | 623077   | 278389   | 253698   | 395818   | 664077   | 514194   | 347888   | 438946   | 322939   | 315096   | 453144   | 498030   | 644184   | 487258   | 536737   | 352827   | 479054   | 287045  |
| EIC     | Negative | 299.2593 | 6.48 | unknown | 4576471  | 10410487 | 11985808 | 11778183 | 11443757 | 11421478 | 7304999  | 16494675 | 8013258  | 6995091  | 4964486  | 5061996  | 5046449  | 8039051  | 5422724  | 3052924  | 4963356  | 9302209  | 829465  |
| EIC     | Negative | 353.2132 | 4.22 | unknown | 168597   | 162171   | 409930   | 409287   | 321683   | 221271   | 262364   | 477617   | 234309   | 210466   | 147694   | 179157   | 188644   | 225516   | 111386   | 163675   | 193990   | 306539   | 163859  |
| EIC     | Negative | 503.2870 | 4.64 | unknown | 1287923  | 1706554  | 1106546  | 1206433  | 1483592  | 1608012  | 1538374  | 1229325  | 1345167  | 973401   | 1336683  | 1130856  | 1115831  | 1440913  | 1267356  | 852546   | 1363491  | 1127407  | 1304720 |
| EIC     | Negative | 337.1693 | 4.08 | unknown | 413316   | 355942   | 488907   | 1250406  | 653332   | 508963   | 730667   | 674682   | 1010173  | 814010   | 640747   | 802582   | 826117   | 219257   | 290312   | 734248   | 681864   | 900295   | 258164  |
| EIC     | Negative | 469.0291 | 0.54 | unknown | 2849583  | 71382862 | 595733   | 8201409  | 4880786  | 4193618  | 6098606  | 11974744 | 5945300  | 3303280  | 5636015  | 7051441  | 7564093  | 3103898  | 4273237  | 4261993  | 6958979  | 7361554  | 2595041 |
| EIC     | Negative | 371.1891 | 5.81 | unknown | 113615   | 284433   | 157563   | 662915   | 307313   | 159239   | 235724   | 255705   | 621181   | 189185   | 149844   | 144604   | 363598   | 114942   | 146975   | 240782   | 297588   | 157934   | 1084126 |
| fpHILIC | Positive | 455.1799 | 2.62 | unknown | 1906427  | 1249114  | 1023832  | 1414848  | 1545558  | 1731731  | 1380878  | 1600878  | 2188059  | 1532351  | 1061293  | 1763601  | 1668622  | 1046914  | 1053294  | 2036889  | 1909055  | 1619662  | 1071129 |
| fpHILIC | Positive | 307.0831 | 4.52 | unknown | 388058   | 151509   | 81704    | 197222   | 291094   | 620941   | 203035   | 146292   | 276598   | 151020   | 178495   | 311350   | 174629   | 272149   | 189444   | 278450   | 281817   | 249197   | 325648  |
| EIC     | Negative | 349.2385 | 2.25 | unknown | 170144   | 0        | 188317   | 171210   | 103083   | 120818   | 80536    | 484629   | 497920   | 110412   | 0        | 0        | 0        | 0        | 0        | 0        | 0        | 469441   | 0       |
| EIC     | Negative | 629.3659 | 4.78 | unknown | 2748733  | 4206098  | 2400651  | 2638354  | 3634729  | 3042706  | 3312382  | 2832031  | 4372278  | 2383256  | 3670554  | 2758344  | 2794956  | 2854993  | 2531987  | 2685441  | 3151188  | 2130227  | 3108117 |
| EIC     | Negative | 251.2015 | 6.28 | unknown | 5014556  | 7119835  | 8628276  | 16011932 | 9833643  | 7853688  | 10864865 | 10186582 | 12432189 | 7948753  | 5704132  | 9283970  | 10609802 | 4338826  | 4414317  | 6754360  | 7542501  | 10003519 | 5311264 |
| fpHILIC | Positive | 190.1429 | 2.82 | unknown | 323355   | 488868   | 293199   | 405470   | 354902   | 631523   | 282963   | 162243   | 804380   | 378506   | 351031   | 409906   | 462702   | 303861   | 357130   | 512859   | 368125   | 315407   | 308666  |
| fpHILIC | Positive | 534.2936 | 0.90 | unknown | 282980   | 453273   | 430779   | 321419   | 409963   | 505104   | 640019   | 224670   | 467391   | 248238   | 373047   | 406750   | 379131   | 355821   | 387664   | 395756   | 300588   | 196329   | 338165  |
| fpHILIC | Negative | 165.0555 | 0.57 | unknown | 10805295 | 2189300  | 2419653  | 1688705  | 5056176  | 19908718 | 2370850  | 1522517  | 2164094  | 2321714  | 1964072  | 2114897  | 1809671  | 2986075  | 2799424  | 1542405  | 1566311  | 2253822  | 1848958 |
| fpHILIC | Negative | 132.4748 | 0.54 | unknown | 654394   | 287353   | 190641   | 341797   | 440851   | 391426   | 321348   | 117755   | 442978   | 177515   | 305888   | 310258   | 264825   | 248153   | 429256   | 211294   | 184197   | 118549   | 254172  |
| fpHILIC | Negative | 271.2278 | 0.39 | unknown | 0        | 1821260  | 4594227  | 5860128  | 3006040  | 3121304  | 2895988  | 4610733  | 4452030  | 3548310  | 2186911  | 3225104  | 2779212  | 2094645  | 1320882  | 2804115  | 2462310  | 4214241  | 2454579 |
| fpHILIC | Positive | 781.5547 | 0.44 | unknown | 1034233  | 2311756  | 1550764  | 1676720  | 1639500  | 1703105  | 2148785  | 1503208  | 2854769  | 1234385  | 1658464  | 1567938  | 2000318  | 2616721  | 1747443  | 2003759  | 1753726  | 1202124  | 1606075 |
| EIC     | Negative | 300.2627 | 5.51 | unknown | 311460   | 259435   | 682333   | 622914   | 496186   | 325915   | 389908   | 852334   | 246172   | 384920   | 578131   | 279470   | 284426   | 330674   | 167979   | 264626   | 296932   | 524641   | 255959  |
| EIC     | Negative | 598.3732 | 5.46 | unknown | 8106720  | 7698278  | 8551115  | 7619898  | 8726361  | 8302334  | 8601255  | 10001342 | 5742072  | 7837681  | 7448362  | 6463620  | 6928022  | 6842384  | 7536317  | 5840779  | 7205882  | 7815508  | 6431246 |
| fpHILIC | Negative | 299.0984 | 3.34 | unknown | 705201   | 539757   | 597051   | 624976   | 682999   | 657064   | 695674   | 594711   | 605097   | 571882   | 596217   | 646804   | 571136   | 384745   | 538341   | 594175   | 710582   | 559377   | 540851  |
| EIC     | Negative | 327.1633 | 1.83 | unknown | 0        | 23209    | 0        | 165116   | 134398   | 0        | 0        | 0        | 0        | 0        | 0        | 0        | 0        | 0        | 0        | 0        | 0        | 0        | 69842   |
| EIC     | Negative | 397.2048 | 6.23 | unknown | 97890    | 216426   | 155315   | 258321   | 161760   | 123075   | 149589   | 185276   | 486235   | 210901   | 163028   | 94903    | 223091   | 131819   | 114726   | 394913   | 230437   | 136709   | 112731  |
| EIC     | Negative | 435.2327 | 4.13 | unknown | 240744   | 211608   | 421239   | 502062   | 379096   | 254804   | 371837   | 575600   | 370423   | 492517   | 228511   | 239675   | 218043   | 423798   | 168460   | 189818   | 310366   | 526798   | 297795  |
| EIC     | Negative | 301.2659 | 5.71 | unknown | 118932   | 111687   | 351496   | 340545   | 230301   | 156496   | 229169   | 391936   | 287635   | 707076   | 106859   | 140130   | 134914   | 121002   | 60093    | 112324   | 150553   | 265999   | 138160  |
| fpHILIC | Negative | 310.1134 | 3.32 | unknown | 998668   | 1148569  | 820117   | 2491503  | 1404915  | 2508662  | 1119451  | 1269654  | 1428733  | 1521372  | 1760381  | 1572582  | 1570971  | 732966   | 1005314  | 1515448  | 1794785  | 1512609  | 1409216 |
| EIC     | Negative | 632.4754 | 6.44 | unknown | 1353601  | 1837760  | 826942   | 3804821  | 2064410  | 1229640  | 2226569  | 2064754  | 2965573  | 1157854  | 1348482  | 1125010  | 2452533  | 837703   | 846790   | 2236455  | 1486936  | 1321205  | 1079672 |
| fpHILIC | Positive | 190.9925 | 4.01 | unknown | 276818   | 421143   | 505438   | 371387   | 386247   | 252174   | 428729   | 657008   | 376831   | 546377   | 529237   | 225039   | 254213   | 685672   | 713264   | 198111   | 271649   | 394041   | 358066  |
| EIC     | Negative | 389.0306 | 0.54 | unknown | 143505   | 356878   | 295356   | 388464   | 249997   | 209337   | 290574   | 601967   | 286698   | 144774   | 278946   | 337000   | 181076   | 154585   | 211921   | 225761   | 351636   | 380448   | 113518  |
| EIC     | Negative | 599.3781 | 3.16 | unknown | 407327   | 350592   | 378427   | 424354   | 394657   | 503631   | 416120   | 484193   | 272015   | 382175   | 352936   | 435384   | 352026   | 239146   | 327791   | 327328   | 401310   | 478860   | 342153  |
| fpHILIC | Negative | 295.2274 | 0.39 | unknown | 1856855  | 1797972  | 3389772  | 4491974  | 3099130  | 2236323  | 3076267  | 3286371  | 3487290  | 2493490  | 1619219  | 2415189  | 1816752  | 2354699  | 1474531  | 2707508  | 2380704  | 4215994  | 1798394 |
| fpHILIC | Positive | 320.1239 | 3.47 | unknown | 977715   | 700456   | 783886   | 1029105  | 1139238  | 1085606  | 944578   | 1068772  | 767706   | 2909938  | 1101348  | 1179967  | 1058825  | 892436   | 1023237  | 1024567  | 933721   | 1105196  | 477829  |
| EIC     | Negative | 417.2042 | 1.87 | unknown | 28623    | 116101   | 0        | 69517    | 39130    | 37724    | 0        | 197694   | 0        | 65161    | 54058    | 63240    | 95651    | 84814    | 127485   | 46862    | 0        | 42195    |         |
| EIC     | Negative | 288.2260 | 6.35 | unknown | 236220   | 256450   | 536852   | 674061   | 391922   | 506224   | 378605   | 509622   | 328083   | 436660   | 250346   | 413357   | 309679   | 228655   | 173543   | 301945   | 400695   | 449278   | 231612  |
| fpHILIC | Positive | 371.2992 | 0.60 | unknown | 677761   | 250093   | 908426   | 1315930  | 647322   | 864176   | 730178   | 940744   | 1276702  | 623611   | 639294   | 535568   | 907638   | 0        | 235278   | 735231   | 561695   | 582381   | 151577  |
| EIC     | Negative | 351.2163 | 5.06 | unknown | 87555    | 61442    | 101708   | 247767   | 120012   | 97146    | 107969   | 139123   | 169490   | 164261   | 54632    | 72127    | 51804    | 34835    | 123003   | 139752   | 140359   | 43942    |         |
| EIC     | Negative | 391.1749 | 2.85 | unknown | 500423   | 1280480  | 276313   | 550607   | 643067   | 965906   | 652162   | 799259   | 381476   | 1243919  | 1236695  | 814437   | 439499   | 600172   | 762630   | 574061   | 716814   | 940718   | 326135  |
| EIC     | Negative | 605.3555 | 5.31 | unknown | 0        | 1938334  | 0        | 0        | 1581428  | 0        | 2198200  | 0        | 0        | 0        | 0        | 0        | 0        | 0        | 0        | 912899   | 0        | 0        | 0       |
| fpHILIC | Positive | 220.1174 | 1.65 | unknown | 0        | 51940016 | 22024240 | 28259054 | 23277452 | 57460720 | 36245272 | 0        | 38888924 | 23364996 | 38507824 | 37610184 | 32350848 | 33341476 | 51340200 | 50996372 | 15798013 | 23301850 | 0       |
| EIC     | Negative | 606.3784 | 5.50 | unknown | 5254512  | 8588420  | 6933758  | 5693985  | 7609802  | 11874125 | 7868372  | 6711212  | 4842624  | 4840239  | 8667315  | 7500210  | 6707696  | 6968040  | 6632922  | 5946835  | 7435700  | 4550279  | 8178127 |
| EIC     | Negative | 630.3782 | 5.28 | unknown | 2901278  | 3134337  | 2732899  | 2794510  | 3623278  | 4548473  | 4139793  | 2888780  | 2137950  | 2160115  | 3924800  | 3828800  | 2775714  | 2316232  | 3233923  | 2672015  | 3458887  | 2311088  | 3296479 |
| fpHILIC | Positive | 273.1206 | 2.29 | unknown | 0        | 520438   | 925816   | 688675   | 524200   | 618571   | 525195   | 851556   | 363923   | 274188   | 406477   | 200076   | 324060   | 160275   | 233491   | 271408   | 0        | 572080   | 0       |
| EIC     | Negative | 316.2570 | 4.03 | unknown | 548505   | 554505   | 28682    | 1896055  | 855129   | 765427   | 844609   | 1149590  | 971721   | 761395   | 524732   | 898625   | 838074   | 671471   | 360109   | 1513009  | 726416   | 1304147  | 22114   |
| fpHILIC | Positive | 257.1508 | 2.29 | unknown | 2106079  | 5608421  | 7440330  | 10328407 | 10178366 | 9595215  | 6050910  | 9152170  | 3696466  | 4160075  | 4201882  | 4380364  | 8659962  | 9312639  | 9518342  | 6682865  | 1232834  | 6332949  | 1588887 |
| EIC     | Negative | 526.2845 | 4.71 | unknown | 853224   | 1904408  | 830096   | 214403   | 2129345  | 2116661  | 321243   | 272787   | 2388664  | 760717   | 1526523  | 164480   | 1101294  | 2325761  | 1612519  | 1206133  | 1638285  | 830056   | 1348011 |
| EIC     | Negative | 608.3942 | 5.49 | unknown | 341109   | 605186   | 240029   | 424342   | 488214   | 852964   | 559049   | 374599   | 351345   | 387512   | 430232   | 35806    | 366021   | 545260   | 344660   | 197051   | 161820   | 182079   | 582677  |
| EIC     | Negative | 508.3380 | 3.38 | unknown | 100955   | 58365    | 125188   | 80672    | 92805    | 100604   | 82805    | 142110   | 55727    | 21679    | 42178    | 44444    | 48348    | 60115    | 66243    | 51855    | 41662    | 113708   | 33682   |
| fpHILIC | Positive | 133.0738 | 3.36 |         |          |          |          |          |          |          |          |          |          |          |          |          |          |          |          |          |          |          |         |

|         |          |          |      |         |          |          |          |          |          |          |          |          |          |          |          |          |          |          |          |          |          |          |          |
|---------|----------|----------|------|---------|----------|----------|----------|----------|----------|----------|----------|----------|----------|----------|----------|----------|----------|----------|----------|----------|----------|----------|----------|
| EIC     | Negative | 526.2947 | 5.07 | unknown | 3912706  | 2312995  | 3612867  | 4026577  | 4436174  | 7292780  | 4788923  | 3670326  | 1349348  | 2654057  | 3630547  | 4983947  | 1699049  | 2686066  | 4540498  | 1474576  | 3103281  | 2587937  | 3069811  |
| EIC     | Negative | 243.1965 | 3.23 | unknown | 412051   | 346555   | 1068403  | 1008448  | 752552   | 559346   | 611417   | 1167675  | 843740   | 605854   | 385486   | 428619   | 414156   | 535570   | 172474   | 354491   | 475106   | 841483   | 437735   |
| EIC     | Negative | 560.3314 | 6.23 | unknown | 665804   | 705196   | 731194   | 772925   | 806757   | 788785   | 757803   | 722345   | 701776   | 715641   | 787999   | 762306   | 728566   | 745312   | 701507   | 716349   | 730366   | 744766   | 682238   |
| EIC     | Negative | 271.2281 | 4.29 | unknown | 751764   | 579830   | 1119721  | 1418132  | 1019253  | 814762   | 842749   | 1410385  | 1047283  | 828801   | 600454   | 656840   | 760795   | 736959   | 536271   | 930739   | 741589   | 1121218  | 674855   |
| EIC     | Negative | 308.0679 | 1.55 | unknown | 2066907  | 2286928  | 1447118  | 772827   | 2575625  | 2899852  | 2682661  | 1041727  | 682100   | 1285582  | 2543182  | 2093307  | 1679659  | 1765155  | 2698125  | 1512417  | 2077209  | 975249   | 2536639  |
| EIC     | Negative | 606.3776 | 4.79 | unknown | 296750   | 250403   | 0        | 316665   | 2575872  | 3155720  | 0        | 372466   | 169321   | 0        | 372466   | 0        | 279496   | 0        | 0        | 0        | 269265   | 0        | 0        |
| EIC     | Negative | 325.2010 | 3.09 | unknown | 346711   | 336955   | 499064   | 644883   | 549629   | 362758   | 445288   | 620161   | 505319   | 446810   | 311870   | 371462   | 383369   | 516875   | 235769   | 324630   | 408944   | 552781   | 365459   |
| EIC     | Negative | 387.1084 | 1.39 | unknown | 321293   | 361455   | 0        | 0        | 213792   | 245077   | 473223   | 0        | 241924   | 0        | 95081    | 126840   | 286915   | 88593    | 58221    | 218610   | 171179   | 0        | 275697   |
| EIC     | Negative | 428.1904 | 0.69 | unknown | 100197   | 114942   | 75828    | 62642    | 64433    | 79202    | 103607   | 157189   | 80960    | 75933    | 102052   | 133175   | 96953    | 80300    | 88711    | 77601    | 79645    | 98797    | 90803    |
| EIC     | Negative | 558.3329 | 6.11 | unknown | 2632310  | 2907580  | 2570041  | 2820660  | 2648695  | 2768914  | 2930133  | 2794947  | 2645323  | 2646075  | 2653574  | 2873135  | 2837558  | 2672979  | 2516776  | 2567671  | 2756627  | 2591107  | 2812137  |
| fpHILIC | Negative | 163.0402 | 1.77 | unknown | 759283   | 369924   | 350128   | 194633   | 401505   | 708585   | 659800   | 208422   | 152279   | 260371   | 445898   | 252892   | 229672   | 291636   | 302278   | 198812   | 256475   | 820897   | 249149   |
| fpHILIC | Positive | 163.0797 | 3.75 | unknown | 279967   | 339593   | 279426   | 207589   | 314134   | 632042   | 317665   | 135034   | 254926   | 172903   | 343786   | 268004   | 325285   | 625340   | 258360   | 309611   | 280427   | 179427   | 251955   |
| EIC     | Negative | 507.3332 | 1.99 | unknown | 0        | 220958   | 0        | 0        | 287839   | 570520   | 147785   | 0        | 132380   | 0        | 215040   | 301889   | 177337   | 202887   | 259238   | 158080   | 203912   | 0        | 108488   |
| EIC     | Negative | 516.2734 | 3.30 | unknown | 561188   | 356669   | 394194   | 0        | 297500   | 598664   | 261711   | 412976   | 395055   | 487476   | 242079   | 380172   | 227784   | 238059   | 370565   | 346536   | 525262   | 0        | 545898   |
| fpHILIC | Positive | 381.0783 | 3.53 | unknown | 105331   | 702467   | 175959   | 165990   | 261390   | 246404   | 577079   | 391886   | 628518   | 194437   | 136022   | 235739   | 260435   | 716689   | 216336   | 181607   | 425894   | 234499   | 632342   |
| fpHILIC | Negative | 189.0349 | 2.71 | unknown | 940958   | 582462   | 734893   | 1180989  | 755197   | 882010   | 866688   | 941464   | 970505   | 938670   | 744057   | 795773   | 806070   | 685402   | 451387   | 846029   | 848038   | 928277   | 623340   |
| EIC     | Negative | 296.2313 | 4.49 | unknown | 395429   | 290819   | 875772   | 1151800  | 681224   | 446230   | 492599   | 1148296  | 917314   | 487945   | 331350   | 409187   | 361754   | 570151   | 127588   | 401846   | 389730   | 853102   | 340302   |
| EIC     | Negative | 425.3074 | 6.58 | unknown | 239207   | 670290   | 1147811  | 439265   | 982930   | 294573   | 354777   | 914599   | 974348   | 5119883  | 785445   | 272582   | 907635   | 206643   | 339118   | 602545   | 514440   | 489894   | 198632   |
| EIC     | Negative | 627.3504 | 4.43 | unknown | 53603895 | 69128127 | 53774986 | 55055661 | 62967034 | 59941779 | 64465307 | 55287518 | 63111057 | 53384643 | 66527980 | 60053884 | 60896149 | 58590223 | 58179703 | 60265750 | 57831881 | 51590502 | 59737895 |
| EIC     | Negative | 382.3418 | 6.72 | unknown | 125545   | 164654   | 201710   | 337708   | 194139   | 219081   | 271403   | 164663   | 178597   | 169442   | 268700   | 248678   | 140124   | 194008   | 211232   | 229475   | 268236   | 140309   | 0        |
| fpHILIC | Positive | 158.0268 | 1.02 | unknown | 351113   | 200557   | 376339   | 222610   | 249866   | 494871   | 157386   | 313133   | 601339   | 161200   | 272681   | 280483   | 263193   | 376302   | 220424   | 227204   | 408054   | 257516   | 204120   |
| EIC     | Negative | 320.2260 | 5.66 | unknown | 0        | 0        | 0        | 0        | 0        | 203766   | 228701   | 0        | 0        | 0        | 162834   | 258080   | 0        | 0        | 0        | 0        | 205718   | 0        | 0        |
| fpHILIC | Positive | 202.1181 | 2.40 | unknown | 4430570  | 3151245  | 3683662  | 3995291  | 3891399  | 6002427  | 3337912  | 3969827  | 3112547  | 3700112  | 4797456  | 3695187  | 3475055  | 2606365  | 2906107  | 3324090  | 4100800  | 2506121  | 3479177  |
| EIC     | Negative | 327.2255 | 6.22 | unknown | 108225   | 352079   | 111212   | 472072   | 324009   | 245342   | 211832   | 160564   | 470716   | 173919   | 318960   | 185102   | 441796   | 161273   | 194726   | 629943   | 309355   | 212956   | 184194   |
| fpHILIC | Negative | 242.1844 | 0.38 | unknown | 607831   | 640635   | 495553   | 3276068  | 889301   | 789321   | 1390342  | 1134131  | 2514766  | 1382961  | 808699   | 1208493  | 1443015  | 180368   | 298122   | 1045468  | 1323825  | 2193071  | 247778   |
| EIC     | Negative | 275.1269 | 3.25 | unknown | 81936    | 90332    | 86335    | 173286   | 89355    | 100928   | 97757    | 100938   | 156880   | 102962   | 77079    | 149988   | 149312   | 73212    | 75021    | 118480   | 120266   | 98384    | 75553    |
| fpHILIC | Negative | 217.0175 | 0.77 | unknown | 1070744  | 304852   | 428675   | 214716   | 425736   | 1132002  | 386112   | 384891   | 530991   | 86824    | 32478    | 82541    | 105279   | 226933   | 141879   | 173970   | 81736    | 170433   | 0        |
| EIC     | Negative | 473.2881 | 2.76 | unknown | 603128   | 619171   | 555738   | 714370   | 1006149  | 539788   | 1168180  | 295541   | 257108   | 227319   | 0        | 0        | 0        | 0        | 0        | 0        | 90840    | 83502    | 0        |
| EIC     | Negative | 523.3841 | 5.80 | unknown | 0        | 169746   | 0        | 0        | 348159   | 0        | 0        | 0        | 0        | 0        | 0        | 98239    | 195323   | 0        | 0        | 84280    | 0        | 121287   | 18539    |
| EIC     | Negative | 283.2427 | 6.41 | unknown | 3707619  | 6666150  | 5160749  | 8576713  | 6482801  | 5819981  | 5806074  | 6631986  | 7284998  | 5072646  | 4970955  | 5825570  | 6666388  | 4606377  | 4233841  | 5856070  | 6377789  | 5952471  | 4156870  |
| fpHILIC | Negative | 429.3003 | 0.40 | unknown | 1177682  | 467443   | 1406895  | 519394   | 668587   | 670684   | 843328   | 1426897  | 1067858  | 524566   | 473745   | 438094   | 393402   | 1204866  | 629832   | 438354   | 576029   | 737286   | 568226   |
| EIC     | Negative | 377.1798 | 1.90 | unknown | 193906   | 455474   | 0        | 0        | 206620   | 320292   | 367832   | 0        | 191473   | 0        | 307512   | 217541   | 99028    | 0        | 320017   | 396330   | 199483   | 0        | 149678   |
| fpHILIC | Negative | 222.0263 | 0.59 | unknown | 627285   | 816196   | 207068   | 468783   | 337204   | 1465459  | 516152   | 278462   | 175865   | 596696   | 1465520  | 611717   | 560741   | 499893   | 308412   | 537955   | 0        | 1021434  | 0        |
| EIC     | Negative | 253.1446 | 2.00 | unknown | 267244   | 453703   | 200372   | 122842   | 436391   | 347840   | 404046   | 0        | 500534   | 155944   | 332533   | 321973   | 400950   | 277947   | 330245   | 615175   | 408395   | 0        | 236880   |
| EIC     | Negative | 326.2720 | 5.20 | unknown | 261619   | 228361   | 225599   | 255932   | 255400   | 261844   | 228276   | 264524   | 241599   | 253325   | 236627   | 253935   | 94250    | 266339   | 243722   | 44399    | 261531   | 30208    | 32058    |
| EIC     | Negative | 602.3388 | 4.14 | unknown | 43694    | 95037    | 114433   | 165052   | 142658   | 431673   | 127074   | 0        | 0        | 0        | 0        | 328433   | 388461   | 475809   | 96698    | 0        | 0        | 96229    | 0        |
| EIC     | Negative | 232.8893 | 0.66 | unknown | 26348    | 72525    | 93648    | 85375    | 66835    | 52355    | 67756    | 119081   | 77165    | 60113    | 68422    | 89450    | 28316    | 56453    | 54476    | 81751    | 96657    | 53105    | 0        |
| fpHILIC | Positive | 232.1539 | 1.83 | unknown | 11887471 | 17966620 | 14221863 | 13440093 | 14361327 | 24781862 | 18844606 | 11738198 | 12835019 | 0        | 17721650 | 16927182 | 15470689 | 26557990 | 13363095 | 16930703 | 13372223 | 9541811  | 12945118 |
| fpHILIC | Positive | 127.0502 | 1.03 | unknown | 1053972  | 561811   | 842749   | 1017017  | 938172   | 1012570  | 688995   | 665823   | 968758   | 635014   | 438519   | 459929   | 490552   | 396734   | 432972   | 524787   | 509253   | 455914   | 275667   |
| fpHILIC | Negative | 619.2891 | 0.50 | unknown | 3318748  | 3658057  | 2727293  | 2678036  | 3386982  | 4468000  | 4254425  | 2584801  | 3938606  | 2155868  | 4110283  | 4449310  | 3967200  | 3093531  | 3512078  | 3975872  | 4015624  | 2046850  | 4326257  |
| EIC     | Negative | 291.1220 | 3.08 | unknown | 79283    | 186636   | 135109   | 183295   | 194857   | 87751    | 137567   | 192939   | 89696    | 96943    | 177032   | 266206   | 66206    | 78219    | 247867   | 115705   | 121613   | 47012    | 17032    |
| EIC     | Negative | 276.2050 | 6.16 | unknown | 208482   | 228776   | 302540   | 1154153  | 532141   | 373570   | 583112   | 592811   | 608178   | 310943   | 205660   | 375427   | 397605   | 70044    | 189968   | 337603   | 308600   | 473986   | 180675   |
| EIC     | Negative | 299.2590 | 6.00 | unknown | 600814   | 613935   | 849458   | 801409   | 729202   | 708063   | 762678   | 804810   | 643899   | 550121   | 566981   | 624277   | 610403   | 740405   | 505440   | 6489564  | 638388   | 742542   | 740766   |
| fpHILIC | Negative | 200.1738 | 0.40 | unknown | 813214   | 578562   | 1196426  | 1761179  | 1035744  | 743938   | 724340   | 1071245  | 1871612  | 740883   | 506294   | 620189   | 797447   | 512149   | 384549   | 691005   | 722213   | 949128   | 665028   |
| EIC     | Negative | 253.1446 | 2.36 | unknown | 956402   | 677001   | 1002381  | 1164983  | 753854   | 848175   | 1000029  | 1302574  | 887292   | 1362592  | 644800   | 660033   | 631820   | 614618   | 691074   | 774666   | 735879   | 1214415  | 838570   |
| EIC     | Negative | 484.3647 | 6.02 | unknown | 1360397  | 1368879  | 1304501  | 2909051  | 1604246  | 1764859  | 1822209  | 1577936  | 2443061  | 1245168  | 1543802  | 1680716  | 1954888  | 668888   | 1203799  | 2148324  | 1192237  | 1379285  | 992583   |
| EIC     | Negative | 316.8898 | 0.66 | unknown | 19949    | 94757    | 113377   | 103825   | 74499    | 19703    | 80540    | 61213    | 86897    | 62123    | 85989    | 95064    | 121222   | 21732    | 57625    | 97985    | 109445   | 136209   | 52199    |
| EIC     | Negative | 552.3321 | 4.04 | unknown | 4432121  | 8149139  | 4549633  | 1281205  | 6017666  | 7560236  | 8204842  | 6414307  | 3902462  | 4424311  | 6011250  | 7399179  | 6344512  | 7420451  | 7184957  | 5683207  | 6832183  | 4017399  | 5904306  |
| fpHILIC | Positive | 804.5516 | 0.44 | unknown | 1006671  | 2818905  | 1325505  | 1625346  | 1826697  | 2190775  | 2469627  | 1467867  | 2477540  | 1310029  | 2044274  | 2334019  | 3044197  | 2158476  | 2052525  | 2483500  | 2391592  | 175589   | 1863864  |
| EIC     | Negative | 635.3377 |      |         |          |          |          |          |          |          |          |          |          |          |          |          |          |          |          |          |          |          |          |

|         |          |          |      |         |          |          |          |          |          |          |          |          |          |          |          |          |          |          |          |          |          |          |          |
|---------|----------|----------|------|---------|----------|----------|----------|----------|----------|----------|----------|----------|----------|----------|----------|----------|----------|----------|----------|----------|----------|----------|----------|
| fpHILIC | Negative | 328.2363 | 0.37 | unknown | 7922750  | 19612596 | 9110410  | 26857354 | 16137965 | 11911823 | 15675947 | 14667008 | 24501590 | 12067491 | 10263071 | 10524747 | 18225682 | 7106261  | 10562353 | 15391818 | 14585811 | 12543941 | 9745140  |
| fpHILIC | Negative | 92.0434  | 1.74 | unknown | 334641   | 1017071  | 1080497  | 1367485  | 971187   | 1090733  | 1035062  | 875393   | 1219955  | 925427   | 787752   | 1031351  | 966754   | 640695   | 625208   | 1171554  | 864401   | 1118340  | 800011   |
| fpHILIC | Negative | 270.1712 | 0.41 | unknown | 1130315  | 641358   | 1081558  | 765838   | 674198   | 958793   | 914027   | 864667   | 1253372  | 1269061  | 950029   | 1021577  | 840741   | 564928   | 612950   | 756136   | 839214   | 1156566  | 837310   |
| EIC     | Negative | 595.3806 | 6.00 | unknown | 1445098  | 1918826  | 1434819  | 3171622  | 1591762  | 2450783  | 2227714  | 1468507  | 1044802  | 1060218  | 1327100  | 1493218  | 1282735  | 1171281  | 1482536  | 1008977  | 1291877  | 906312   | 1284991  |
| EIC     | Negative | 335.1865 | 2.49 | unknown | 1357761  | 330497   | 581428   | 382090   | 748859   | 643272   | 892834   | 1403031  | 212175   | 1220409  | 273267   | 326210   | 243008   | 295001   | 374945   | 271544   | 351247   | 1123100  | 431068   |
| EIC     | Negative | 418.3730 | 3.75 | unknown | 272027   | 390095   | 238753   | 292204   | 307613   | 348520   | 327380   | 258861   | 326357   | 219495   | 327426   | 266645   | 313038   | 289687   | 325356   | 332400   | 288362   | 257623   | 251062   |
| EIC     | Negative | 463.9059 | 6.24 | unknown | 1455745  | 2343160  | 1182381  | 2907306  | 1620161  | 2975225  | 2072795  | 1893583  | 2163035  | 2025764  | 3790706  | 1469982  | 1856192  | 4625532  | 2306899  | 1124923  | 3440924  | 1259679  | 2147716  |
| fpHILIC | Negative | 539.3033 | 0.38 | unknown | 317987   | 474242   | 1307522  | 1679989  | 923598   | 876024   | 931100   | 1292300  | 1173442  | 617907   | 468761   | 726254   | 674468   | 250977   | 181687   | 292185   | 914812   | 1165572  | 796032   |
| EIC     | Negative | 527.2984 | 5.06 | unknown | 1234128  | 666362   | 1105381  | 1208140  | 1168912  | 2204986  | 1353069  | 1095584  | 392208   | 754635   | 1057427  | 1524818  | 531679   | 849428   | 1279829  | 404318   | 895677   | 812769   | 862341   |
| EIC     | Negative | 310.1746 | 5.20 | unknown | 0        | 320994   | 421471   | 0        | 713230   | 0        | 396308   | 0        | 448353   | 0        | 0        | 225145   | 0        | 0        | 0        | 0        | 0        | 0        | 416300   |
| fpHILIC | Positive | 150.0545 | 0.97 | unknown | 302988   | 388564   | 144313   | 158972   | 422399   | 463982   | 400716   | 116569   | 282267   | 255953   | 586434   | 488734   | 386235   | 372752   | 536865   | 341200   | 363403   | 215615   | 0        |
| fpHILIC | Positive | 763.5924 | 0.44 | unknown | 452005   | 394265   | 381702   | 259719   | 427584   | 385932   | 271888   | 407881   | 435558   | 377819   | 538934   | 386438   | 352572   | 543590   | 356393   | 354540   | 310830   | 303636   | 301320   |
| fpHILIC | Positive | 245.0955 | 2.61 | unknown | 1062792  | 778425   | 565356   | 1363642  | 791337   | 1263764  | 770259   | 794468   | 1201528  | 820770   | 584933   | 1083046  | 935538   | 717522   | 669995   | 1154466  | 671904   | 923748   | 740065   |
| fpHILIC | Negative | 369.1558 | 0.47 | unknown | 713288   | 422405   | 466940   | 1038662  | 677201   | 798506   | 727429   | 559201   | 675533   | 554123   | 571249   | 570692   | 562737   | 223983   | 554420   | 849765   | 509050   | 653419   | 224810   |
| EIC     | Negative | 431.3180 | 5.26 | unknown | 299308   | 61517    | 507409   | 198940   | 277105   | 144465   | 266784   | 501259   | 163872   | 116544   | 77501    | 101934   | 99822    | 112146   | 142986   | 105361   | 110186   | 236193   | 127151   |
| EIC     | Negative | 301.1658 | 1.60 | unknown | 92435    | 168418   | 168548   | 0        | 138968   | 47146    | 142823   | 191058   | 166853   | 126487   | 102393   | 73260    | 73117    | 77277    | 69780    | 61684    | 78430    | 56879    | 128515   |
| EIC     | Negative | 276.2050 | 5.81 | unknown | 1729428  | 4308784  | 2786722  | 12465517 | 5350691  | 2595227  | 4176416  | 4682624  | 10150539 | 2772047  | 2432684  | 2224274  | 5052000  | 1883443  | 2158347  | 3550285  | 4793661  | 2729687  | 1569854  |
| fpHILIC | Negative | 147.0300 | 3.97 | unknown | 16165833 | 8599044  | 10062224 | 16745211 | 12970774 | 17355014 | 13016778 | 11232698 | 11837419 | 8486015  | 2832574  | 8915153  | 9389089  | 8373961  | 9627336  | 10556342 | 10661743 | 12034780 | 9359498  |
| fpHILIC | Positive | 197.1011 | 5.40 | unknown | 1229763  | 1254003  | 972320   | 975404   | 1125046  | 1256403  | 1172874  | 976890   | 1204999  | 887478   | 1198021  | 1186068  | 1217534  | 1111966  | 1514881  | 1150182  | 887485   | 972028   | 1096365  |
| fpHILIC | Positive | 227.1250 | 1.80 | unknown | 27517252 | 20187306 | 20602202 | 26651420 | 21628300 | 31516220 | 26115820 | 21011746 | 25940060 | 24711172 | 2829586  | 22966058 | 26505310 | 17985766 | 22432112 | 29635742 | 22127286 | 21649574 | 18387006 |
| EIC     | Negative | 463.9667 | 3.75 | unknown | 102899   | 130662   | 70284    | 103198   | 122965   | 116649   | 109140   | 84374    | 106847   | 78095    | 118441   | 97669    | 91469    | 99377    | 111023   | 127425   | 90818    | 95941    | 77048    |
| fpHILIC | Positive | 264.1497 | 3.37 | unknown | 1908170  | 1207218  | 439536   | 287117   | 674720   | 1092122  | 822019   | 965538   | 1325364  | 281576   | 484010   | 628529   | 1135203  | 1125624  | 1308762  | 609435   | 878693   | 368313   | 0        |
| EIC     | Negative | 568.3623 | 4.78 | unknown | 0        | 0        | 503960   | 339148   | 423534   | 0        | 397741   | 296595   | 360706   | 0        | 0        | 0        | 456058   | 0        | 0        | 0        | 0        | 0        | 417557   |
| EIC     | Negative | 366.9415 | 3.64 | unknown | 327090   | 565307   | 354714   | 448510   | 520358   | 524867   | 485180   | 345132   | 480442   | 3525273  | 492721   | 459970   | 565598   | 487643   | 547179   | 317123   | 407546   | 363731   | 448497   |
| fpHILIC | Negative | 279.9955 | 0.98 | unknown | 1210841  | 1157642  | 972763   | 878935   | 1509110  | 1844447  | 1689220  | 524302   | 326969   | 0        | 0        | 0        | 0        | 0        | 0        | 0        | 0        | 0        | 0        |
| EIC     | Negative | 244.1999 | 3.23 | unknown | 68059    | 52943    | 178832   | 158528   | 120534   | 92436    | 103793   | 178376   | 124741   | 104181   | 71997    | 71583    | 72464    | 88028    | 27449    | 58151    | 85678    | 124901   | 78015    |
| EIC     | Negative | 435.2326 | 4.03 | unknown | 57383    | 21893    | 107255   | 240698   | 105784   | 63455    | 69187    | 184469   | 144110   | 120369   | 31927    | 88973    | 90960    | 30024    | 14774    | 106088   | 76215    | 187729   | 0        |
| EIC     | Negative | 290.8484 | 0.66 | unknown | 43916    | 112302   | 162836   | 143366   | 116180   | 60322    | 106875   | 203823   | 139639   | 100122   | 114793   | 123325   | 157794   | 42870    | 83991    | 92028    | 136095   | 169815   | 94727    |
| EIC     | Negative | 307.1655 | 3.16 | unknown | 936800   | 446595   | 923156   | 765667   | 854035   | 462841   | 792348   | 1200363  | 590884   | 864394   | 357765   | 348752   | 412052   | 341370   | 467035   | 488239   | 550201   | 214495   | 321787   |
| EIC     | Negative | 373.2058 | 3.94 | unknown | 60237    | 0        | 412139   | 26623    | 44838    | 336968   | 198908   | 28053    | 45183    | 38304    | 32973    | 336321   | 365151   | 251401   | 86803    | 235998   | 54581    | 73611    | 162021   |
| EIC     | Negative | 379.2472 | 4.72 | unknown | 515700   | 394253   | 1019793  | 1140966  | 833136   | 574253   | 716253   | 1112737  | 882449   | 756800   | 476813   | 617834   | 573213   | 646313   | 167983   | 736317   | 595800   | 848888   | 470496   |
| EIC     | Negative | 275.2016 | 5.81 | unknown | 8717824  | 21739927 | 14025785 | 62472529 | 27060828 | 13059648 | 21116356 | 23034657 | 50943855 | 14009608 | 12231552 | 11392167 | 25121787 | 9356231  | 10804597 | 17563606 | 24188286 | 13859154 | 7762502  |
| fpHILIC | Negative | 165.0555 | 1.62 | unknown | 149814   | 0        | 535174   | 511472   | 1220665  | 240676   | 0        | 613437   | 0        | 413317   | 0        | 0        | 300346   | 0        | 602611   | 0        | 485944   | 708174   | 478788   |
| EIC     | Negative | 247.1703 | 4.79 | unknown | 1008459  | 2053129  | 1962818  | 8904323  | 3030126  | 1368430  | 2327742  | 3127158  | 7522922  | 2331713  | 1166623  | 1443760  | 3777195  | 821012   | 672852   | 2885866  | 2962766  | 2839906  | 1026656  |
| fpHILIC | Negative | 174.0123 | 4.59 | unknown | 2130206  | 1670039  | 1668406  | 1825211  | 1772846  | 2345632  | 1926923  | 1525790  | 1684933  | 1679445  | 1792432  | 1672900  | 1687812  | 1522652  | 1467284  | 1766446  | 1490688  | 1683400  | 1702485  |
| EIC     | Negative | 299.2234 | 2.87 | unknown | 70836    | 72704    | 109597   | 101992   | 117011   | 84273    | 67915    | 141347   | 52783    | 127944   | 71679    | 60674    | 63961    | 55201    | 45411    | 52643    | 68727    | 134647   | 66437    |
| EIC     | Negative | 305.1749 | 3.44 | unknown | 1057150  | 370011   | 772495   | 268305   | 659435   | 602449   | 801860   | 648718   | 203953   | 316664   | 173470   | 495350   | 170901   | 336807   | 481772   | 182546   | 400329   | 273056   | 144310   |
| EIC     | Negative | 252.1306 | 3.23 | unknown | 54808    | 79625    | 108333   | 187433   | 137656   | 74055    | 122126   | 92716    | 142831   | 69240    | 68599    | 116351   | 80718    | 50906    | 48340    | 81954    | 90313    | 80385    | 86194    |
| EIC     | Negative | 571.2871 | 2.74 | unknown | 419443   | 297190   | 271644   | 327436   | 326019   | 349312   | 261233   | 362170   | 0        | 0        | 0        | 0        | 0        | 0        | 0        | 0        | 0        | 0        | 0        |
| EIC     | Negative | 458.3494 | 5.67 | unknown | 756978   | 565430   | 587854   | 1178804  | 615490   | 723391   | 576143   | 728592   | 1102443  | 573931   | 626144   | 586000   | 696933   | 305107   | 500740   | 706387   | 381450   | 510939   | 349126   |
| EIC     | Negative | 227.0900 | 1.25 | unknown | 72326    | 29099    | 35554    | 60900    | 37311    | 48209    | 52318    | 29099    | 30101    | 34071    | 36824    | 34701    | 45864    | 46662    | 35197    | 32556    | 40380    | 26565    | 24856    |
| EIC     | Negative | 609.3876 | 5.74 | unknown | 352429   | 447281   | 395416   | 288535   | 393965   | 530796   | 461852   | 390512   | 215432   | 282764   | 368989   | 361480   | 282612   | 269961   | 283523   | 233468   | 348495   | 276598   | 363642   |
| EIC     | Negative | 286.2103 | 5.79 | unknown | 28432    | 36072    | 76263    | 167642   | 125720   | 32343    | 85415    | 54153    | 0        | 0        | 0        | 69907    | 56473    | 12183    | 0        | 33321    | 33696    | 78388    | 20913    |
| EIC     | Negative | 628.3531 | 4.43 | unknown | 12240520 | 15323859 | 12033404 | 12565585 | 13971551 | 13665235 | 14200904 | 12199214 | 14060299 | 12156844 | 14948833 | 13656600 | 13805568 | 13212215 | 13254149 | 13633678 | 13446956 | 11700829 | 13374312 |
| EIC     | Negative | 361.1659 | 1.76 | unknown | 324378   | 408958   | 319110   | 323269   | 364210   | 334620   | 410079   | 335954   | 344472   | 329184   | 356695   | 495223   | 592609   | 416197   | 411281   | 464794   | 393660   | 0        | 366322   |
| fpHILIC | Positive | 789.6135 | 0.44 | unknown | 1826080  | 1626748  | 2050544  | 1838191  | 1982801  | 1900507  | 1716363  | 2453090  | 1333472  | 2065130  | 2159518  | 1850662  | 1440687  | 2299464  | 1960002  | 1424825  | 1883888  | 1504289  | 1760149  |
| EIC     | Negative | 367.2436 | 6.43 | unknown | 4125254  | 0        | 5068332  | 6476867  | 5112098  | 5740210  | 0        | 7733875  | 5358982  | 6023207  | 3555268  | 4685516  | 5369749  | 3983709  | 3487248  | 4611122  | 4002111  | 2142367  | 5360547  |
| EIC     | Negative | 283.1291 | 2.18 | unknown | 398963   | 272323   | 271366   | 321763   | 300734   | 423315   | 336230   | 285943   | 232070   | 390398   | 199124   | 260593   | 213393   | 184692   | 255115   | 246149   | 245129   | 369760   | 233188   |
| fpHILIC | Negative | 148.0335 | 3.97 | unknown | 856914   | 506949   | 520462   | 936637   | 702609   | 954234   | 706630   | 615358   | 622924   | 547738   | 49       |          |          |          |          |          |          |          |          |

|         |          |          |      |         |          |          |          |          |          |          |          |          |          |          |         |          |          |         |         |          |          |          |         |       |
|---------|----------|----------|------|---------|----------|----------|----------|----------|----------|----------|----------|----------|----------|----------|---------|----------|----------|---------|---------|----------|----------|----------|---------|-------|
| EIC     | Negative | 409.2865 | 4.44 | unknown | 0        | 387679   | 442122   | 512907   | 0        | 243069   | 472088   | 516401   | 547360   | 0        | 31659   | 37376    | 0        | 0       | 0       | 0        | 0        | 0        | 194941  | 94611 |
| EIC     | Negative | 435.0356 | 2.09 | unknown | 77818    | 151675   | 0        | 0        | 120054   | 114611   | 111436   | 0        | 100450   | 0        | 89986   | 12575    | 44397    | 57128   | 73233   | 83075    | 0        | 0        | 0       | 56701 |
| EIC     | Negative | 305.1774 | 3.46 | unknown | 1015241  | 340605   | 739778   | 433531   | 627585   | 545138   | 739338   | 1002850  | 240045   | 597788   | 270416  | 462756   | 314473   | 318649  | 425894  | 355666   | 355168   | 752188   | 268386  |       |
| EIC     | Negative | 603.4632 | 5.82 | unknown | 67936    | 209444   | 122636   | 510841   | 204366   | 154031   | 260850   | 226408   | 381187   | 89704    | 102681  | 62167    | 171364   | 107095  | 132424  | 62338    | 196379   | 0        | 52501   |       |
| EIC     | Negative | 278.1841 | 3.32 | unknown | 0        | 199535   | 0        | 324387   | 0        | 369261   | 269632   | 0        | 10337    | 0        | 262658  | 382407   | 0        | 0       | 0       | 0        | 0        | 0        | 284714  | 0     |
| EIC     | Negative | 256.0698 | 2.42 | unknown | 130631   | 37830    | 455786   | 68927    | 690309   | 65602    | 65089    | 68096    | 73399    | 1314362  | 103180  | 167371   | 72705    | 74854   | 8886    | 46270    | 67800    | 173321   | 84577   |       |
| fpHILIC | Negative | 305.2492 | 0.37 | unknown | 7308564  | 13572176 | 13399585 | 13122711 | 11086642 | 11200185 | 13286101 | 11991991 | 13170069 | 10157987 | 1074064 | 10849193 | 10930309 | 1701118 | 8490821 | 7641659  | 11975655 | 10668283 | 9916221 |       |
| fpHILIC | Negative | 337.2050 | 0.35 | unknown | 860952   | 401571   | 313747   | 412602   | 1113748  | 274242   | 662088   | 244052   | 110279   | 751580   | 427776  | 364946   | 629585   | 340310  | 304004  | 401722   | 522149   | 455089   | 432364  |       |
| EIC     | Negative | 559.3376 | 6.11 | unknown | 745501   | 865678   | 747936   | 908381   | 817009   | 827867   | 900394   | 796657   | 774453   | 805239   | 815133  | 917415   | 833021   | 865448  | 821880  | 764032   | 853197   | 715268   | 812946  |       |
| EIC     | Negative | 360.1536 | 2.09 | unknown | 2765737  | 1926263  | 1163496  | 232557   | 1823306  | 1878469  | 1979918  | 1702638  | 1954405  | 1298068  | 2038880 | 12104    | 474055   | 1052062 | 1399884 | 3724687  | 73974    | 418236   | 1052447 |       |
| EIC     | Negative | 288.2052 | 6.21 | unknown | 75928    | 108223   | 111637   | 192633   | 148171   | 111842   | 120530   | 158768   | 114056   | 146971   | 88071   | 107241   | 129164   | 20733   | 56633   | 127179   | 109250   | 128464   | 69401   |       |
| fpHILIC | Positive | 511.3583 | 0.59 | unknown | 1320609  | 1505558  | 1215357  | 1239707  | 1375860  | 1765273  | 1589925  | 1296178  | 1351212  | 1249651  | 1376730 | 1313628  | 1709398  | 1211149 | 1500155 | 1323790  | 1500109  | 12379825 | 1499304 |       |
| EIC     | Positive | 268.1272 | 2.93 | unknown | 170028   | 239481   | 88927    | 77371    | 149263   | 218444   | 187820   | 85925    | 115387   | 136181   | 152353  | 135748   | 129652   | 160079  | 192525  | 158975   | 130058   | 88896    | 104192  |       |
| fpHILIC | Positive | 112.0507 | 2.61 | unknown | 6033146  | 4267182  | 3035410  | 6500643  | 4050499  | 5820295  | 3938005  | 4316576  | 6112507  | 4367403  | 2825918 | 5407199  | 4608123  | 3463926 | 3786644 | 6408438  | 3594985  | 4364396  | 3470995 |       |
| EIC     | Negative | 306.2413 | 6.44 | unknown | 648209   | 821298   | 126879   | 1151781  | 836825   | 581274   | 597092   | 705824   | 885004   | 590935   | 625173  | 700576   | 712658   | 607965  | 596501  | 650491   | 705774   | 740625   | 633682  |       |
| EIC     | Negative | 556.3526 | 4.84 | unknown | 8555075  | 10767773 | 8452339  | 8686026  | 9081617  | 9126343  | 9278696  | 8705943  | 10307848 | 8300008  | 9788665 | 9517261  | 9460787  | 9766580 | 9732586 | 9470885  | 8896957  | 7542648  | 9690848 |       |
| EIC     | Negative | 634.3356 | 4.04 | unknown | 253231   | 526879   | 239142   | 132695   | 380503   | 472520   | 450271   | 250955   | 248179   | 275638   | 416680  | 434335   | 367074   | 431140  | 475314  | 303485   | 415534   | 240473   | 354622  |       |
| EIC     | Negative | 300.2627 | 6.48 | unknown | 963423   | 1985599  | 2243544  | 2417378  | 2307256  | 1328855  | 1468930  | 3263085  | 1637794  | 786281   | 637357  | 1052332  | 1684334  | 1569463 | 786281  | 622213   | 993159   | 1863300  | 154522  |       |
| EIC     | Negative | 630.3690 | 4.93 | unknown | 1308539  | 752222   | 1156808  | 1314074  | 1110008  | 2013725  | 1656642  | 1220049  | 301310   | 775609   | 1104550 | 1402509  | 702372   | 517258  | 1132145 | 548002   | 961677   | 856321   | 1002434 |       |
| fpHILIC | Negative | 280.0519 | 2.61 | unknown | 857099   | 559376   | 415284   | 815305   | 555724   | 828052   | 538484   | 639163   | 585694   | 606480   | 478049  | 856342   | 782419   | 484003  | 606480  | 658350   | 622731   | 663338   | 567479  |       |
| EIC     | Negative | 359.1503 | 2.09 | unknown | 12655604 | 8519135  | 5192382  | 1184771  | 8108874  | 8289235  | 8818078  | 7721607  | 8871301  | 540228   | 9033383 | 111311   | 2071811  | 4789466 | 6376304 | 16629339 | 605401   | 11472012 | 4486005 |       |
| EIC     | Negative | 266.1842 | 3.31 | unknown | 459354   | 158304   | 390231   | 0        | 283825   | 272112   | 293256   | 358657   | 332808   | 364339   | 283193  | 130865   | 188895   | 260534  | 175914  | 444820   | 152800   | 158990   | 0       |       |
| fpHILIC | Negative | 160.0332 | 3.84 | unknown | 461562   | 358444   | 442713   | 364806   | 387527   | 697680   | 397546   | 414921   | 248157   | 284292   | 548437  | 309120   | 296262   | 1493281 | 426282  | 304204   | 314104   | 290358   | 523903  |       |
| EIC     | Negative | 272.0649 | 1.64 | unknown | 160255   | 25928    | 0        | 0        | 24202    | 115556   | 64519    | 0        | 177771   | 0        | 206454  | 202354   | 77175    | 33885   | 0       | 30259    | 57930    | 27621    | 88818   |       |
| EIC     | Negative | 311.1861 | 2.50 | unknown | 138196   | 101261   | 119812   | 217347   | 110041   | 99893    | 163233   | 164328   | 173671   | 138098   | 74562   | 89387    | 136275   | 82249   | 67084   | 194693   | 125162   | 190890   | 77628   |       |
| EIC     | Negative | 504.3153 | 5.65 | unknown | 842331   | 1386339  | 1064142  | 277003   | 1157744  | 2076242  | 1134342  | 968772   | 519956   | 429200   | 599522  | 1502661  | 1143099  | 592752  | 914726  | 726599   | 1368838  | 0        | 0       |       |
| EIC     | Negative | 287.0567 | 1.04 | unknown | 136047   | 45089    | 172540   | 46068    | 160863   | 181722   | 101327   | 49494    | 322695   | 112505   | 201882  | 354767   | 108945   | 56548   | 14498   | 36351    | 77120    | 115310   | 116572  |       |
| EIC     | Negative | 298.2470 | 4.72 | unknown | 1314416  | 1050748  | 2864168  | 3641175  | 2241317  | 1628712  | 1872121  | 3394946  | 2642843  | 2022327  | 1169606 | 1753706  | 1644684  | 1773209 | 727892  | 2110515  | 1728482  | 2665408  | 1170109 |       |
| EIC     | Negative | 594.3777 | 6.00 | unknown | 4432370  | 5919117  | 4513978  | 3973612  | 4773324  | 7335721  | 6730006  | 4516931  | 3215180  | 3278757  | 4156943 | 4680333  | 4018301  | 3638836 | 4690287 | 3332119  | 3939447  | 2817517  | 4020675 |       |
| fpHILIC | Negative | 225.1863 | 0.39 | unknown | 694878   | 5759202  | 10387520 | 20633700 | 12423045 | 6028466  | 11576698 | 9834046  | 1312639  | 7385522  | 3277902 | 8073364  | 7123040  | 2813954 | 2319590 | 6451487  | 7123730  | 8971966  | 4800954 |       |
| fpHILIC | Positive | 571.4280 | 0.41 | unknown | 469119   | 139752   | 133521   | 272529   | 695000   | 182718   | 302048   | 205319   | 419515   | 403697   | 397519  | 572671   | 170493   | 379609  | 343321  | 290908   | 568399   | 208096   | 287476  |       |
| fpHILIC | Positive | 201.0865 | 2.59 | unknown | 829102   | 465882   | 748815   | 818707   | 626344   | 1027845  | 695330   | 877297   | 415857   | 650700   | 654215  | 665361   | 524404   | 625517  | 568198  | 775154   | 531089   | 596767   | 563908  |       |
| fpHILIC | Negative | 495.1908 | 3.51 | unknown | 91000    | 796103   | 471478   | 137838   | 218764   | 203113   | 412921   | 280091   | 699748   | 1381706  | 191006  | 182561   | 212391   | 666079  | 182408  | 167697   | 328020   | 153017   | 949399  |       |
| EIC     | Negative | 456.4143 | 6.35 | unknown | 944332   | 861150   | 1833639  | 2375145  | 1363787  | 878838   | 1874374  | 1914826  | 1469604  | 1317905  | 613572  | 1242292  | 779618   | 477516  | 430497  | 595084   | 903603   | 1188443  | 517722  |       |
| EIC     | Negative | 435.2698 | 5.41 | unknown | 208367   | 409941   | 203001   | 482163   | 58841    | 227646   | 194278   | 783412   | 294535   | 307883   | 135433  | 363904   | 454684   | 401099  | 65962   | 144329   | 159262   | 172333   | 0       |       |
| EIC     | Negative | 390.1955 | 5.79 | unknown | 102446   | 147938   | 214744   | 374359   | 255421   | 136201   | 230754   | 217858   | 230976   | 175927   | 91546   | 260953   | 175674   | 81629   | 30051   | 118186   | 138736   | 188501   | 94982   |       |
| fpHILIC | Negative | 153.0444 | 0.52 | unknown | 3388743  | 2078635  | 1438495  | 366728   | 2023286  | 1865122  | 2072128  | 1921300  | 2476144  | 1611340  | 2027123 | 0        | 597100   | 1128028 | 1263917 | 3761436  | 2711376  | 284354   | 1500274 |       |
| EIC     | Negative | 331.1902 | 5.58 | unknown | 1238970  | 1526302  | 2154846  | 5298512  | 2334070  | 1434194  | 2166011  | 2809626  | 4092930  | 2182167  | 1207133 | 2105800  | 2499774  | 937558  | 1008313 | 1983728  | 1934648  | 2682013  | 1304496 |       |
| fpHILIC | Negative | 149.0279 | 0.78 | unknown | 496004   | 324909   | 314944   | 180701   | 1219609  | 981189   | 139802   | 208612   | 125344   | 182612   | 225344  | 222892   | 580945   | 411990  | 96304   | 3000410  | 200410   | 191854   | 432346  |       |
| EIC     | Negative | 552.3342 | 4.04 | unknown | 4503874  | 7865543  | 4681447  | 3731500  | 6544401  | 7705164  | 8895311  | 4689239  | 4295048  | 4630448  | 6937214 | 7297927  | 6605395  | 7337967 | 7645255 | 5568800  | 7240078  | 4236861  | 9500819 |       |
| EIC     | Negative | 319.2711 | 3.30 | unknown | 235747   | 271612   | 241548   | 236884   | 245014   | 247859   | 233209   | 271451   | 243309   | 230072   | 247839  | 273469   | 247839   | 229167  | 256971  | 236920   | 242835   | 218058   | 246267  |       |
| EIC     | Negative | 569.3659 | 5.55 | unknown | 1613104  | 1930896  | 1484670  | 1584614  | 1841090  | 2224983  | 2037336  | 1656705  | 1415150  | 1261280  | 1491253 | 1622431  | 1691209  | 1423852 | 1864006 | 1446332  | 1529784  | 1076007  | 1558928 |       |
| EIC     | Negative | 630.3691 | 4.78 | unknown | 703264   | 1151278  | 566521   | 642699   | 833565   | 565612   | 632956   | 851600   | 828860   | 611000   | 828860  | 692765   | 611480   | 768900  | 577630  | 682216   | 723678   | 490279   | 675091  |       |
| EIC     | Negative | 273.1245 | 3.38 | unknown | 19464    | 50136    | 88585    | 179970   | 97943    | 58734    | 77478    | 93084    | 103700   | 72118    | 44600   | 78573    | 63725    | 26325   | 12283   | 71315    | 52010    | 110294   | 21447   |       |
| EIC     | Negative | 322.1776 | 5.79 | unknown | 139218   | 253897   | 319977   | 579801   | 390168   | 214946   | 387708   | 341997   | 366239   | 249728   | 145405  | 343255   | 291334   | 94273   | 84391   | 262089   | 196952   | 286730   | 113702  |       |
| EIC     | Negative | 325.2026 | 3.00 | unknown | 246062   | 148394   | 319593   | 500958   | 288998   | 219121   | 239514   | 421398   | 349028   | 352163   | 174995  | 318088   | 266935   | 116441  | 89326   | 240443   | 261503   | 442829   | 128071  |       |
| fpHILIC | Negative | 327.1453 | 0.57 | unknown | 357783   | 316182   | 987650   | 148256   | 349146   | 409796   | 365820   | 562164   | 405889   | 207614   | 974399  | 665899   | 417903   | 991197  | 108272  | 522559   | 272802   | 188428   | 523160  |       |
| EIC     | Negative | 319.2785 | 3.76 | unknown | 261953   | 314220   | 249418   | 285448   | 289645   | 300739   | 277452   | 262612   | 274537   | 286472   | 278048  | 281202   | 267631   | 278033  | 258436  | 282630   | 284063   | 277491   | 291379  |       |
| EIC     | Negative | 255.1969 | 3.69 | unknown | 397636   | 379252   |          |          |          |          |          |          |          |          |         |          |          |         |         |          |          |          |         |       |

|         |          |          |      |         |           |           |           |           |           |           |           |           |           |           |           |           |           |           |           |           |           |           |           |
|---------|----------|----------|------|---------|-----------|-----------|-----------|-----------|-----------|-----------|-----------|-----------|-----------|-----------|-----------|-----------|-----------|-----------|-----------|-----------|-----------|-----------|-----------|
| fpHILIC | Positive | 323.1264 | 4.19 | unknown | 1305656   | 341995    | 254451    | 122859    | 587646    | 1324803   | 450194    | 101814    | 240068    | 50840     | 92198     | 132083    | 67463     | 437848    | 85710     | 147916    | 55706     | 227801    | 49295     |
| EIC     | Negative | 309.1526 | 3.78 | unknown | 789828    | 263684    | 687741    | 307625    | 474578    | 467400    | 499556    | 1021169   | 116096    | 0         | 357865    | 274977    | 230911    | 147381    | 308295    | 236428    | 293370    | 645679    | 365420    |
| EIC     | Negative | 235.1705 | 3.05 | unknown | 360808    | 380108    | 345921    | 338341    | 337750    | 334276    | 394037    | 361920    | 321028    | 0         | 335132    | 335775    | 336522    | 342395    | 321274    | 400288    | 346941    | 356327    | 348692    |
| fpHILIC | Positive | 395.1617 | 3.72 | unknown | 669572    | 592082    | 644442    | 575492    | 738076    | 597465    | 589591    | 577667    | 560768    | 616153    | 580082    | 568632    | 551488    | 397155    | 669587    | 558120    | 552338    | 590104    | 410072    |
| EIC     | Negative | 303.2249 | 4.96 | unknown | 190393    | 0         | 0         | 0         | 0         | 0         | 0         | 237543    | 0         | 0         | 171893    | 193192    | 174600    | 121763    | 86876     | 0         | 0         | 0         | 146980    |
| fpHILIC | Negative | 136.0165 | 0.52 | unknown | 1072258   | 712508    | 667593    | 129336    | 646850    | 703752    | 925806    | 600881    | 973643    | 740544    | 770475    | 0         | 220632    | 394937    | 384924    | 1179612   | 59991     | 135717    | 562927    |
| EIC     | Negative | 503.2984 | 5.13 | unknown | 1922339   | 2587377   | 1757499   | 1479969   | 2384649   | 2560550   | 2117175   | 1684759   | 637800    | 1905740   | 1807960   | 1387358   | 1373045   | 2302040   | 1524745   | 767536    | 1698377   | 1213711   | 1766624   |
| EIC     | Negative | 588.3326 | 4.52 | unknown | 802901    | 870121    | 743662    | 743271    | 802477    | 833632    | 737828    | 785382    | 894249    | 740082    | 863332    | 810234    | 860065    | 796085    | 797797    | 815465    | 740429    | 768179    | 816387    |
| EIC     | Negative | 352.2207 | 3.47 | unknown | 55480     | 21148     | 68255     | 21485     | 80262     | 58418     | 59826     | 146897    | 121255    | 85145     | 57819     | 84966     | 77480     | 21846     | 21463     | 76729     | 56706     | 137578    | 23453     |
| EIC     | Negative | 285.2073 | 2.37 | unknown | 528563    | 261926    | 392838    | 421670    | 379782    | 420619    | 391545    | 545289    | 218638    | 370819    | 209781    | 290280    | 223218    | 180065    | 194759    | 244674    | 223586    | 471056    | 205039    |
| EIC     | Negative | 562.3844 | 2.71 | unknown | 1023529   | 397515    | 710575    | 570990    | 622641    | 1266604   | 572197    | 564809    | 444251    | 547111    | 470842    | 519101    | 632565    | 653703    | 430634    | 486825    | 590962    | 666883    | 500649    |
| EIC     | Negative | 252.2046 | 6.28 | unknown | 904534    | 1260894   | 1983430   | 2763649   | 1758442   | 1412543   | 1941373   | 1811577   | 2222888   | 1574161   | 978817    | 1645331   | 2037580   | 791115    | 819114    | 1148987   | 1372734   | 1839947   | 961354    |
| EIC     | Negative | 490.1993 | 1.03 | unknown | 96381     | 62526     | 75439     | 38725     | 57668     | 77639     | 100461    | 83736     | 69046     | 161812    | 70733     | 82783     | 68150     | 116182    | 52921     | 56781     | 52064     | 69028     | 139187    |
| fpHILIC | Negative | 129.0193 | 4.58 | unknown | 10697994  | 8248063   | 8294852   | 9614712   | 8999072   | 11609105  | 9246608   | 7341168   | 9320008   | 7134938   | 8858671   | 8278941   | 8185928   | 7898191   | 7671312   | 9417301   | 7974378   | 8501163   | 7434358   |
| EIC     | Negative | 375.2168 | 5.02 | unknown | 239779    | 319864    | 267992    | 720993    | 392296    | 362778    | 418513    | 381446    | 500706    | 376511    | 315324    | 468804    | 406230    | 218295    | 235490    | 388131    | 346973    | 470635    | 187021    |
| EIC     | Negative | 609.3650 | 4.04 | unknown | 449010    | 39887     | 615716    | 207752    | 174222    | 106563    | 93167     | 1047962   | 108589    | 293256    | 1047962   | 16284     | 52565     | 107169    | 115039    | 21942     | 108282    | 348693    | 98059     |
| fpHILIC | Positive | 292.0725 | 2.43 | unknown | 504402    | 238432    | 1062424   | 143221    | 722033    | 586334    | 236891    | 55145     | 477573    | 143267    | 0         | 701844    | 740074    | 0         | 0         | 0         | 1015190   | 0         | 0         |
| EIC     | Negative | 629.4762 | 6.17 | unknown | 516164    | 554326    | 604630    | 2459497   | 825900    | 768937    | 1487543   | 1114737   | 487565    | 443207    | 499909    | 662312    | 240937    | 361701    | 340293    | 655838    | 569409    | 252268    | 0         |
| EIC     | Negative | 459.1509 | 1.48 | unknown | 0         | 842973    | 0         | 0         | 370839    | 378783    | 390254    | 0         | 338008    | 0         | 353376    | 288685    | 354804    | 382512    | 416704    | 293631    | 330105    | 0         | 226469    |
| EIC     | Negative | 460.1545 | 1.48 | unknown | 0         | 185541    | 0         | 0         | 83754     | 84681     | 84558     | 0         | 79085     | 0         | 71900     | 86239     | 81931     | 90250     | 67191     | 81217     | 0         | 0         | 0         |
| EIC     | Negative | 243.1794 | 1.85 | unknown | 1900683   | 989935    | 492209    | 0         | 1053644   | 1309841   | 1286769   | 0         | 927351    | 0         | 846147    | 800475    | 952315    | 781813    | 862083    | 1493873   | 874015    | 0         | 1069766   |
| EIC     | Negative | 367.1401 | 1.78 | unknown | 261323    | 186435    | 206867    | 314189    | 276165    | 331779    | 299459    | 74238     | 274102    | 264597    | 235228    | 280019    | 283048    | 150813    | 283291    | 385836    | 249148    | 0         | 128100    |
| EIC     | Negative | 322.1442 | 2.51 | unknown | 212121    | 112962    | 197036    | 170244    | 176183    | 133935    | 165300    | 276063    | 118908    | 176813    | 95882     | 112682    | 104249    | 100563    | 121828    | 118700    | 108594    | 192518    | 87463     |
| fpHILIC | Negative | 193.0242 | 4.72 | unknown | 2098778   | 1460524   | 1397997   | 1743133   | 1542582   | 2090956   | 1522782   | 1455647   | 1786144   | 1422226   | 1432553   | 1470109   | 1436515   | 1493447   | 1253158   | 1892401   | 1397819   | 1520139   | 1407218   |
| EIC     | Negative | 568.3626 | 5.55 | unknown | 5391718   | 6267623   | 5128172   | 5235829   | 6013102   | 7206981   | 6636191   | 5634432   | 4831953   | 4084208   | 4984648   | 5499284   | 5459920   | 4623975   | 6056321   | 4701260   | 4966584   | 3572438   | 4866386   |
| EIC     | Negative | 394.2622 | 6.44 | unknown | 2089748   | 1331919   | 527310    | 1084556   | 947629    | 1329386   | 1591038   | 1532871   | 1068298   | 1103711   | 1212768   | 613649    | 939227    | 1121367   | 1165755   | 651258    | 1192743   | 705463    | 714546    |
| fpHILIC | Negative | 227.2016 | 0.39 | unknown | 21927522  | 25714652  | 59758540  | 75810808  | 42874628  | 29223602  | 43582996  | 59401480  | 54174992  | 34852992  | 20557826  | 30622552  | 35871612  | 18030686  | 13975875  | 25999374  | 34000880  | 47306688  | 2454862   |
| fpHILIC | Positive | 564.3314 | 0.40 | unknown | 2719790   | 3096371   | 2096640   | 2223331   | 2707703   | 2168952   | 2456173   | 2782865   | 3171588   | 1614628   | 2357421   | 2523043   | 4435697   | 3710014   | 1012041   | 2711440   | 2277825   | 1819031   | 4675252   |
| EIC     | Negative | 283.1919 | 3.46 | unknown | 14850843  | 4282461   | 11490539  | 7647764   | 8725350   | 7910534   | 10146010  | 15038661  | 3616473   | 9391998   | 3917768   | 6485776   | 4515368   | 4200027   | 5398993   | 5286911   | 5193366   | 11326929  | 3442740   |
| EIC     | Negative | 293.2125 | 3.46 | unknown | 135065    | 105171    | 206662    | 392497    | 165957    | 120938    | 180174    | 248385    | 345821    | 280804    | 120050    | 248560    | 194987    | 80915     | 90599     | 336150    | 185518    | 246577    | 124091    |
| EIC     | Negative | 256.2000 | 3.69 | unknown | 81937     | 58222     | 41081     | 235042    | 139419    | 73717     | 134935    | 123897    | 122634    | 129301    | 69759     | 120839    | 107465    | 35054     | 21702     | 102738    | 107165    | 138277    | 36162     |
| fpHILIC | Negative | 255.2329 | 0.38 | unknown | 224955440 | 343397216 | 461329568 | 582365440 | 376129408 | 343023264 | 379646080 | 426973824 | 522734688 | 286097248 | 284759136 | 353196928 | 389244576 | 279387104 | 256241216 | 335271232 | 342267328 | 357533696 | 325501408 |
| EIC     | Negative | 366.2665 | 5.93 | unknown | 211386    | 0         | 0         | 0         | 0         | 20956     | 0         | 0         | 224870    | 0         | 167586    | 0         | 0         | 0         | 0         | 0         | 0         | 0         | 0         |
| fpHILIC | Positive | 131.0892 | 2.71 | unknown | 820460    | 975098    | 702653    | 1071078   | 956182    | 1239589   | 953106    | 628912    | 828286    | 642062    | 1124279   | 810955    | 927312    | 490503    | 670446    | 1020415   | 1017817   | 740370    | 641668    |
| EIC     | Negative | 301.2661 | 4.40 | unknown | 239177    | 168163    | 215653    | 211488    | 221000    | 215657    | 211054    | 212677    | 211054    | 213335    | 172287    | 187026    | 217557    | 185973    | 204220    | 230765    | 159153    | 216017    | 184649    |
| EIC     | Negative | 311.1648 | 3.67 | unknown | 290698    | 276145    | 340192    | 301336    | 119814    | 839038    | 203856    | 169009    | 77264     | 282372    | 285833    | 389671    | 489707    | 292628    | 136112    | 338332    | 241454    | 352376    | 297837    |
| EIC     | Negative | 284.9514 | 3.46 | unknown | 2605401   | 759963    | 2097452   | 1357173   | 1560380   | 1412548   | 1772074   | 2677272   | 612280    | 1707431   | 724401    | 1152366   | 797863    | 760282    | 965113    | 652280    | 935076    | 2027722   | 605668    |
| fpHILIC | Negative | 848.5942 | 0.43 | unknown | 1560601   | 1198881   | 1382080   | 1301425   | 1409889   | 1506118   | 1035654   | 617082    | 977075    | 1330312   | 1211482   | 1395721   | 1050190   | 1349291   | 1415712   | 1004547   | 1266047   | 1251355   | 1398279   |
| EIC     | Negative | 485.3033 | 2.88 | unknown | 260682    | 23623     | 229081    | 38124     | 67053     | 62861     | 412600    | 52107     | 931615    | 19418     | 30870     | 37005     | 22752     | 56836     | 32319     | 53288     | 14815     | 225622    | 24011     |
| fpHILIC | Positive | 309.1285 | 3.48 | unknown | 1420191   | 1481713   | 1517223   | 1418616   | 1238152   | 1356688   | 1610547   | 1337293   | 1319310   | 1511502   | 1229197   | 948948    | 1352794   | 689436    | 1232315   | 1065984   | 1426746   | 1568816   | 1110897   |
| EIC     | Negative | 330.2522 | 6.49 | unknown | 13907329  | 3819816   | 11912751  | 27235358  | 13153525  | 13468292  | 12453039  | 20042810  | 11590786  | 14607104  | 12907367  | 11180306  | 10133475  | 7209274   | 10922170  | 10055406  | 9482019   | 22310220  | 11804713  |
| EIC     | Negative | 351.2166 | 5.19 | unknown | 206577    | 364795    | 332160    | 1076041   | 521429    | 317530    | 482193    | 494827    | 617448    | 355553    | 357058    | 669776    | 446761    | 172026    | 168691    | 382666    | 366743    | 664980    | 192709    |
| EIC     | Negative | 489.2839 | 2.74 | unknown | 205645    | 2016451   | 3215548   | 2931060   | 2893557   | 3397146   | 1756222   | 3454630   | 3295870   | 582821    | 0         | 0         | 727710    | 47535     | 0         | 0         | 0         | 0         | 431341    |
| EIC     | Negative | 252.2049 | 6.31 | unknown | 490874    | 840104    | 1420327   | 1301291   | 1438438   | 557005    | 1332676   | 1303799   | 1456002   | 915742    | 675660    | 1116787   | 0         | 352283    | 0         | 560269    | 926501    | 1549720   | 0         |
| EIC     | Negative | 427.2711 | 0.91 | unknown | 143047    | 42100     | 128143    | 248096    | 69272     | 177724    | 61101     | 298009    | 42515     | 154762    | 63806     | 59095     | 74251     | 43088     | 53607     | 111630    | 64645     | 250513    | 51149     |
| EIC     | Negative | 393.1727 | 3.20 | unknown | 124290    | 51141     | 76340     | 96393     | 62176     | 115964    | 87942     | 108276    | 41808     | 43688     | 47177     | 0         | 0         | 0         | 0         | 0         | 40053     | 0         | 41082     |
| EIC     | Negative | 251.1322 | 3.39 | unknown | 112539    | 165948    | 0         | 0         | 0         | 0         | 240830    | 0         | 301066    | 0         | 145922    | 0         | 0         | 0         | 0         | 0         | 0         | 0         | 154204    |
| fpHILIC | Negative | 153.0307 | 2.64 | unknown | 417264    | 370354    | 315127    | 501927    | 395318    | 534620    | 397468    | 308198    | 348706    | 417783    | 506053    | 391824    | 406727    | 265111    | 389303    | 341351    | 411863    | 323901    | 316387    |
| EIC     | Negative | 271.0615 | 1.64 | unknown | 840151    | 160966    | 425041    | 0         | 131143    | 653877    | 358922    | 92864     | 1110947   | 318740    | 1215961   | 1179548   | 400724    | 226700    | 53181     | 157849    | 267947    | 255876    | 447741    |
| EIC     | Negative | 228.2047 |      |         |           |           |           |           |           |           |           |           |           |           |           |           |           |           |           |           |           |           |           |

|         |          |          |      |         |           |           |           |           |           |           |           |           |           |           |           |           |           |           |           |           |           |           |           |
|---------|----------|----------|------|---------|-----------|-----------|-----------|-----------|-----------|-----------|-----------|-----------|-----------|-----------|-----------|-----------|-----------|-----------|-----------|-----------|-----------|-----------|-----------|
| EIC     | Negative | 359.2960 | 6.24 | unknown | 0         | 446170    | 473199    | 775580    | 586743    | 805407    | 591699    | 0         | 331195    | 507053    | 619924    | 602141    | 0         | 0         | 481563    | 489794    | 512898    | 0         | 0         |
| EIC     | Negative | 396.3123 | 5.83 | unknown | 137740    | 167785    | 135850    | 162109    | 147537    | 171413    | 153010    | 139179    | 137320    | 122059    | 144507    | 146246    | 150658    | 181404    | 155161    | 146619    | 153068    | 129089    | 140560    |
| fpHILIC | Positive | 383.1152 | 3.16 | unknown | 846746    | 896177    | 917222    | 1029707   | 947121    | 957899    | 895443    | 946792    | 943368    | 973785    | 820753    | 952063    | 953202    | 742287    | 905795    | 863294    | 874087    | 775951    | 817735    |
| EIC     | Negative | 227.2014 | 6.35 | unknown | 75122258  | 97313091  | 170436732 | 212991060 | 133726823 | 103908780 | 121232610 | 178442943 | 152849058 | 94235738  | 61413931  | 95063444  | 103112096 | 58829834  | 45634266  | 78815298  | 85681503  | 131038409 | 74253104  |
| EIC     | Negative | 631.3817 | 5.49 | unknown | 3068160   | 2743447   | 2574129   | 2701057   | 2958308   | 3350334   | 3154232   | 2697365   | 2178534   | 1890750   | 2865810   | 2636429   | 1964995   | 1731694   | 1956475   | 1538424   | 2166731   | 1924086   | 2623279   |
| fpHILIC | Negative | 267.2328 | 0.38 | unknown | 3001711   | 4265727   | 6365380   | 7951901   | 4568555   | 3750683   | 5121410   | 6737265   | 6692151   | 3394782   | 3296424   | 3936634   | 5871614   | 2882715   | 2187101   | 4333353   | 4157062   | 4914749   | 3473405   |
| EIC     | Negative | 251.1921 | 5.58 | unknown | 338008    | 499315    | 609985    | 7764784   | 720870    | 421408    | 612382    | 871556    | 1287058   | 567156    | 311133    | 597055    | 678813    | 283920    | 269456    | 544665    | 588189    | 487985    | 355584    |
| EIC     | Negative | 630.3685 | 4.43 | unknown | 0         | 0         | 0         | 0         | 0         | 0         | 0         | 0         | 0         | 0         | 0         | 0         | 0         | 0         | 0         | 0         | 0         | 0         | 0         |
| EIC     | Negative | 305.1738 | 4.91 | unknown | 1657124   | 1996239   | 3076396   | 7417007   | 4225469   | 1844093   | 3582401   | 3510820   | 4132667   | 2474169   | 3174589   | 2960522   | 2552787   | 996808    | 748631    | 2020257   | 2213693   | 3517995   | 1253833   |
| EIC     | Negative | 303.1574 | 4.34 | unknown | 261187    | 155021    | 277176    | 497795    | 319924    | 229218    | 438445    | 305274    | 337860    | 299860    | 211455    | 368622    | 394231    | 45822     | 118740    | 259441    | 222428    | 423985    | 100314    |
| fpHILIC | Negative | 488.1795 | 3.51 | unknown | 492842    | 3059485   | 2557427   | 571691    | 708203    | 802929    | 1830731   | 1096155   | 2771035   | 467606    | 439549    | 721489    | 757723    | 0         | 666096    | 511557    | 1194321   | 693121    | 0         |
| fpHILIC | Negative | 181.0870 | 0.96 | unknown | 672176    | 604114    | 1644321   | 513484    | 1080363   | 527606    | 1016599   | 780078    | 602427    | 1400534   | 1882137   | 1449445   | 941731    | 1132645   | 236788    | 626566    | 289019    | 432902    | 399301    |
| fpHILIC | Negative | 501.3952 | 0.36 | unknown | 1293307   | 1236913   | 1473555   | 996732    | 1571965   | 948103    | 1613088   | 1120297   | 1259681   | 931573    | 1164929   | 988855    | 937774    | 1009132   | 1438107   | 1370195   | 722138    | 992776    | 916513    |
| fpHILIC | Negative | 112.0516 | 1.80 | unknown | 8541685   | 6244391   | 6566967   | 8151410   | 6402431   | 9351515   | 7369960   | 6304341   | 7709298   | 6959581   | 7659322   | 7016937   | 7598294   | 5645068   | 7330535   | 8224784   | 7192747   | 6844468   | 6150990   |
| fpHILIC | Negative | 487.1782 | 3.52 | unknown | 2048647   | 15741919  | 12420957  | 2459468   | 2991668   | 3526757   | 9124012   | 4987148   | 13798916  | 1458823   | 1049384   | 3057774   | 3304245   | 0         | 2770541   | 1818093   | 5844300   | 3033769   | 0         |
| fpHILIC | Negative | 281.2486 | 0.37 | unknown | 288683040 | 424136544 | 594543616 | 699828864 | 445140288 | 412217824 | 530359776 | 524745984 | 621440000 | 362279616 | 311728544 | 437793824 | 461788352 | 269496000 | 309970912 | 397594048 | 426658944 | 507640928 | 323202400 |
| EIC     | Negative | 249.1860 | 3.42 | unknown | 623525    | 241251    | 590678    | 542262    | 428202    | 289126    | 465251    | 655075    | 489193    | 458436    | 275990    | 333873    | 285278    | 176997    | 281134    | 342137    | 241905    | 420682    | 225850    |
| EIC     | Negative | 555.3503 | 4.84 | unknown | 41855302  | 52799354  | 42548495  | 42129997  | 44251470  | 43640436  | 45375732  | 41824832  | 49011031  | 40288270  | 47797308  | 47384194  | 46138110  | 47627906  | 47217785  | 45831674  | 43321572  | 36931327  | 41788776  |
| EIC     | Negative | 542.3118 | 1.80 | unknown | 141044    | 90801     | 138672    | 0         | 107941    | 113729    | 94933     | 103319    | 69912     | 96239     | 94452     | 140444    | 93956     | 110291    | 107588    | 71374     | 89314     | 0         | 91016     |
| EIC     | Negative | 359.3002 | 6.24 | unknown | 670984    | 631322    | 533498    | 970479    | 726525    | 1053128   | 694267    | 657174    | 374574    | 644938    | 811182    | 686968    | 452492    | 349375    | 613782    | 852509    | 579130    | 543900    | 447228    |
| fpHILIC | Negative | 282.2513 | 0.37 | unknown | 58672376  | 81310880  | 123478520 | 137908144 | 898989352 | 80722936  | 107374968 | 104277064 | 118960416 | 72192112  | 61252992  | 89170688  | 91303080  | 53521692  | 63540040  | 75255176  | 87267664  | 100519376 | 66019748  |
| EIC     | Negative | 323.2502 | 6.37 | unknown | 0         | 1894834   | 3264384   | 0         | 1515910   | 1574234   | 0         | 2233026   | 0         | 1597780   | 0         | 0         | 1090746   | 0         | 964137    | 0         | 1090746   | 0         | 1667114   |
| EIC     | Negative | 573.4754 | 6.35 | unknown | 623388    | 705865    | 881064    | 767026    | 732686    | 685524    | 835662    | 778299    | 723270    | 488788    | 383378    | 561205    | 763750    | 417733    | 391191    | 467644    | 534275    | 462192    | 753338    |
| EIC     | Negative | 510.3536 | 2.87 | unknown | 934214    | 58646     | 677348    | 176026    | 184709    | 62387     | 178579    | 1380806   | 144997    | 1308006   | 56660     | 66586     | 43827     | 107046    | 109483    | 67580     | 73249     | 697159    | 80114     |
| EIC     | Negative | 630.3781 | 5.49 | unknown | 8123222   | 7637954   | 6952851   | 7473354   | 8410756   | 8889299   | 8596182   | 7472397   | 5608590   | 5188123   | 7904729   | 7470716   | 5527911   | 4833224   | 5484692   | 4358234   | 6274288   | 5250177   | 6904647   |
| EIC     | Negative | 495.2792 | 3.58 | unknown | 365487    | 746258    | 486348    | 332149    | 1177146   | 161484    | 629470    | 347691    | 666877    | 739594    | 618769    | 270072    | 591207    | 678498    | 688654    | 620092    | 567609    | 668228    | 408185    |
| fpHILIC | Positive | 203.0522 | 3.16 | unknown | 19468550  | 21818064  | 21204866  | 24619702  | 22499134  | 20621178  | 21611102  | 22629064  | 21272504  | 21789562  | 20293934  | 22364814  | 22253742  | 17296014  | 20921160  | 20420638  | 20315646  | 18482602  | 17927294  |
| EIC     | Negative | 230.2102 | 6.35 | unknown | 179235    | 11741     | 251025    | 380661    | 213281    | 191025    | 113108    | 256327    | 341250    | 257004    | 549534    | 174619    | 119537    | 60393     | 48510     | 120605    | 70465     | 185186    | 55805     |
| EIC     | Negative | 243.1965 | 3.09 | unknown | 3794450   | 3842358   | 6797768   | 7968280   | 6273303   | 4003464   | 4853859   | 7824335   | 5388636   | 5607255   | 3484755   | 4091473   | 4097297   | 5991145   | 2305139   | 3298715   | 4629489   | 6509321   | 4198169   |
| EIC     | Negative | 474.2629 | 3.93 | unknown | 662728    | 873068    | 707243    | 901484    | 788081    | 924624    | 826590    | 665273    | 643796    | 424283    | 716627    | 464738    | 473608    | 1129091   | 909413    | 536057    | 763715    | 646632    | 734872    |
| fpHILIC | Negative | 140.9194 | 2.12 | unknown | 2420671   | 2877814   | 2214243   | 2938649   | 2545394   | 3070934   | 2701372   | 2507026   | 2600388   | 2338544   | 2971125   | 2756788   | 2608102   | 2481934   | 2412268   | 2313417   | 2665607   | 2328842   | 2595314   |
| EIC     | Negative | 285.2350 | 3.57 | unknown | 75402     | 77889     | 66912     | 80577     | 73005     | 71329     | 72594     | 89628     | 64925     | 72094     | 78906     | 71771     | 83172     | 78290     | 76035     | 70748     | 73702     | 77364     | 64803     |
| EIC     | Negative | 257.2272 | 6.38 | unknown | 801418    | 1075787   | 516981    | 1396745   | 920124    | 1578368   | 1083400   | 783066    | 906212    | 74091     | 836640    | 1490528   | 1280847   | 424491    | 910724    | 960798    | 1167223   | 1056498   | 819660    |
| EIC     | Negative | 345.1745 | 5.58 | unknown | 312788    | 401836    | 482843    | 1200754   | 586673    | 308386    | 492791    | 647802    | 929796    | 565879    | 305431    | 559639    | 635670    | 225771    | 229863    | 530667    | 433331    | 644716    | 313329    |
| EIC     | Negative | 319.1589 | 4.91 | unknown | 401677    | 431608    | 682992    | 1618640   | 929037    | 433329    | 774342    | 746749    | 900896    | 578381    | 302711    | 659549    | 527115    | 231547    | 181503    | 423737    | 417638    | 763765    | 278764    |
| EIC     | Negative | 239.1652 | 3.77 | unknown | 724209    | 701122    | 738495    | 2762974   | 1374967   | 632823    | 1322313   | 1241059   | 1756606   | 1147898   | 991475    | 1306194   | 1462624   | 333584    | 472568    | 1224840   | 903833    | 1736023   | 317928    |
| EIC     | Negative | 548.4692 | 5.78 | unknown | 206433    | 301920    | 443264    | 0         | 598189    | 550384    | 544634    | 0         | 0         | 598189    | 2034763   | 469525    | 343646    | 115663    | 82470     | 255186    | 303279    | 468425    | 150424    |
| EIC     | Negative | 242.1841 | 4.08 | unknown | 5258257   | 4483187   | 6848687   | 24757514  | 9353713   | 7342978   | 10720525  | 9892652   | 15114658  | 11991761  | 8398033   | 12933921  | 12125980  | 2661992   | 3886998   | 10167453  | 9888732   | 153148238 | 3305893   |
| EIC     | Negative | 325.2009 | 3.00 | unknown | 135515    | 165987    | 268179    | 635716    | 256723    | 238944    | 236854    | 301853    | 11991761  | 917118    | 331912    | 248126    | 113740    | 66378     | 66780     | 207712    | 462439    | 113542    | 787674    |
| EIC     | Negative | 303.1589 | 3.22 | unknown | 326507    | 110489    | 231530    | 160192    | 193875    | 184323    | 254548    | 292810    | 54534     | 249007    | 108926    | 146434    | 114162    | 115250    | 190738    | 138968    | 155796    | 261938    | 714964    |
| fpHILIC | Negative | 149.0244 | 0.57 | unknown | 1011627   | 673104    | 699064    | 360010    | 624896    | 585333    | 1059412   | 683774    | 592259    | 4616785   | 458333    | 485124    | 297919    | 709233    | 709233    | 363967    | 396749    | 496362    | 104030    |
| EIC     | Negative | 587.3455 | 3.23 | unknown | 170175    | 180924    | 169034    | 180598    | 192719    | 195952    | 168466    | 182231    | 168711    | 144781    | 171742    | 157663    | 166218    | 159676    | 175121    | 162597    | 169036    | 159500    | 183615    |
| fpHILIC | Positive | 322.2047 | 2.30 | unknown | 1009488   | 718517    | 1281526   | 2013638   | 729430    | 1094071   | 1069757   | 1583550   | 1161097   | 1047617   | 532953    | 732485    | 940993    | 384052    | 698808    | 9057292   | 393941    | 1014430   | 360688    |
| fpHILIC | Negative | 130.0228 | 4.58 | unknown | 541158    | 479673    | 481334    | 567933    | 489798    | 626754    | 566746    | 407882    | 467537    | 386636    | 455831    | 490686    | 472334    | 424414    | 410946    | 589837    | 458208    | 466669    | 415673    |
| EIC     | Negative | 237.1132 | 1.80 | unknown | 152849    | 106706    | 127994    | 0         | 121079    | 97850     | 109106    | 90032     | 101333    | 90249     | 85726     | 78435     | 97673     | 43310     | 102062    | 142373    | 75754     | 0         | 5323      |
| EIC     | Negative | 434.2370 | 6.30 | unknown | 3400060   | 1493662   | 2122415   | 3805133   | 1944733   | 3911814   | 3117253   | 2966240   | 997549    | 1823142   | 1203254   | 2888060   | 1837895   | 1066097   | 2221508   | 1334603   | 1662142   | 3017740   | 1262669   |
| EIC     | Negative | 263.0020 | 1.91 | unknown | 10426559  | 6309526   | 1803424   | 1217312   | 6129383   | 4718447   | 1389813   | 6072760   | 1575664   | 7288097   | 7342114   | 9182516   | 8371327   | 6221256   | 6697547   | 7995514   | 6965140   | 530482    | 6619089   |
| fpHILIC | Negative | 142.9171 | 2.12 | unknown | 2276529   | 2858803   | 2166973   | 2849068   | 2356534   | 3169033   | 2658719   |           |           |           |           |           |           |           |           |           |           |           |           |

|         |          |          |      |         |           |           |           |           |           |           |           |           |           |           |           |           |           |           |           |           |           |           |           |
|---------|----------|----------|------|---------|-----------|-----------|-----------|-----------|-----------|-----------|-----------|-----------|-----------|-----------|-----------|-----------|-----------|-----------|-----------|-----------|-----------|-----------|-----------|
| EIC     | Negative | 309.2716 | 6.57 | unknown | 941549    | 1032386   | 584111    | 813658    | 1042676   | 676755    | 830670    | 809611    | 1136368   | 1159386   | 1269488   | 944322    | 802755    | 788927    | 922834    | 529598    | 852816    | 1330908   | 866945    |
| fpHILIC | Positive | 494.3237 | 0.61 | unknown | 12558132  | 13374523  | 13519752  | 10626311  | 10638983  | 11511624  | 15583880  | 10203929  | 9215732   | 9662322   | 12716031  | 13597259  | 14911869  | 12740216  | 12848489  | 11510890  | 12990120  | 10145471  | 9752411   |
| EIC     | Negative | 530.2327 | 4.84 | unknown | 3011856   | 3109271   | 2940142   | 3056672   | 2893738   | 2759387   | 2921292   | 2953777   | 3125080   | 2867333   | 2216031   | 2939058   | 3048752   | 2924031   | 2997453   | 3117862   | 2887977   | 2648247   | 3042575   |
| EIC     | Negative | 228.9854 | 0.55 | unknown | 486578    | 118993    | 147603    | 340720    | 104783    | 363650    | 177718    | 77335     | 104189    | 238347    | 162910    | 173337    | 116441    | 93169     | 139893    | 227174    | 79593     | 170478    | 212132    |
| EIC     | Negative | 254.1480 | 2.27 | unknown | 1160791   | 691104    | 913390    | 1267820   | 713354    | 629751    | 552575    | 807175    | 587887    | 1148424   | 429724    | 507385    | 639005    | 412471    | 481590    | 579509    | 574909    | 1083301   | 377918    |
| EIC     | Negative | 236.1373 | 4.12 | unknown | 66163     | 48538     | 67930     | 148172    | 49904     | 35044     | 50153     | 77970     | 36967     | 75055     | 38179     | 34871     | 71465     | 7879      | 30718     | 75429     | 40124     | 72413     | 31866     |
| EIC     | Negative | 236.1375 | 4.23 | unknown | 225273    | 107933    | 195736    | 310980    | 84652     | 101597    | 93886     | 154467    | 67001     | 61351     | 78772     | 125251    | 125415    | 15827     | 88871     | 107217    | 78007     | 160284    | 68305     |
| EIC     | Negative | 138.1529 | 4.60 | unknown | 235162    | 63186     | 34197     | 646073    | 67469     | 146439    | 131030    | 225671    | 83277     | 258961    | 75321     | 235487    | 220891    | 0         | 59810     | 135525    | 116587    | 28979     | 52669     |
| EIC     | Negative | 621.4017 | 6.22 | unknown | 2396633   | 775130    | 2200423   | 1577074   | 1083580   | 534530    | 689865    | 2439941   | 777730    | 1839172   | 799374    | 841654    | 728709    | 686067    | 848483    | 958084    | 747121    | 2365736   | 618804    |
| EIC     | Negative | 470.0325 | 0.48 | unknown | 7537529   | 7769606   | 8407015   | 8542689   | 6794546   | 7273543   | 7711572   | 7734563   | 8375282   | 7978871   | 7733839   | 7598014   | 8149986   | 2861459   | 7399664   | 7784801   | 7740623   | 7810850   | 7205103   |
| fpHILIC | Negative | 548.1718 | 3.35 | unknown | 1978329   | 1694149   | 2053814   | 1916817   | 1614428   | 1682243   | 1516597   | 1917917   | 1704250   | 2030011   | 1803357   | 1755334   | 1600877   | 1486168   | 1691567   | 1521039   | 1626430   | 1798087   | 1820444   |
| EIC     | Negative | 576.5632 | 0.64 | unknown | 133977    | 55571     | 131684    | 103245    | 106869    | 80687     | 71383     | 49733     | 80561     | 210309    | 51455     | 30053     | 63816     | 127680    | 60060     | 60272     | 44126     | 89806     | 136042    |
| fpHILIC | Positive | 262.1645 | 2.26 | unknown | 2403175   | 2180602   | 2207504   | 2009000   | 1942072   | 2806617   | 2305985   | 1623381   | 2218345   | 2167810   | 2435450   | 2455747   | 2396874   | 1779958   | 2317761   | 2388815   | 1618583   | 2270776   | 2332068   |
| EIC     | Negative | 542.6502 | 0.52 | unknown | 279199    | 0         | 236787    | 181731    | 225885    | 137457    | 147925    | 0         | 121479    | 275975    | 65960     | 28048     | 90589     | 288761    | 116213    | 102143    | 43553     | 163805    | 208873    |
| fpHILIC | Negative | 311.2957 | 0.37 | unknown | 1160201   | 1286144   | 2015993   | 2087278   | 1513435   | 816033    | 1059770   | 822938    | 861104    | 1387020   | 947264    | 1866820   | 846417    | 1242413   | 719953    | 755833    | 878028    | 1685821   | 1048499   |
| fpHILIC | Negative | 126.0031 | 3.22 | unknown | 11878660  | 8707358   | 8136858   | 9729491   | 8941034   | 10052182  | 7919053   | 7670858   | 8693443   | 8328052   | 7514225   | 8764977   | 9028724   | 7119384   | 7852020   | 9441520   | 8721170   | 9377237   | 8020119   |
| fpHILIC | Positive | 148.0037 | 3.23 | unknown | 2043724   | 2305235   | 2326571   | 2473480   | 2076614   | 2427761   | 2023926   | 1934737   | 2377688   | 1966396   | 1860117   | 2265651   | 2117944   | 2007163   | 2066824   | 2367309   | 2315101   | 2111019   | 2083577   |
| EIC     | Negative | 366.7784 | 0.52 | unknown | 213989    | 87080     | 176476    | 187344    | 224835    | 163553    | 168806    | 48144     | 172060    | 279416    | 72594     | 73349     | 143645    | 651295    | 157416    | 133095    | 101096    | 148352    | 241952    |
| EIC     | Negative | 285.2073 | 3.87 | unknown | 31835648  | 9057790   | 39934108  | 38550908  | 12635130  | 12018841  | 14166488  | 32738961  | 12603487  | 42346903  | 10920967  | 13332545  | 12113989  | 13643782  | 10999529  | 10441659  | 12680231  | 40439754  | 9984270   |
| EIC     | Negative | 325.2658 | 4.47 | unknown | 660716    | 524243    | 600991    | 507562    | 569002    | 541925    | 569078    | 589881    | 495850    | 625113    | 569078    | 607095    | 504973    | 636393    | 567925    | 597607    | 553773    | 6403937   | 531797    |
| EIC     | Negative | 271.1748 | 2.44 | unknown | 1233852   | 626868    | 926504    | 978470    | 800896    | 867976    | 764550    | 914789    | 921394    | 1171051   | 961533    | 909620    | 792305    | 772488    | 826556    | 782018    | 929405    | 1141771   | 608027    |
| EIC     | Negative | 295.2279 | 4.02 | unknown | 8204428   | 4320367   | 12772488  | 13904183  | 6799708   | 5261201   | 5563977   | 13661754  | 5743983   | 10059401  | 4961641   | 5397202   | 4442584   | 10704805  | 5707158   | 3793130   | 6842866   | 14596553  | 6648586   |
| fpHILIC | Negative | 386.0329 | 4.81 | unknown | 1714584   | 198195    | 989293    | 1004661   | 241382    | 277957    | 178834    | 929194    | 214604    | 1209432   | 171235    | 229612    | 186731    | 290146    | 202499    | 241730    | 228422    | 886924    | 290550    |
| EIC     | Negative | 388.0295 | 0.48 | unknown | 8734527   | 9042173   | 10018986  | 9975367   | 7970347   | 8612997   | 9317661   | 9081584   | 9396183   | 9427590   | 8599654   | 8746114   | 9290789   | 4506052   | 8733553   | 9251539   | 9104069   | 8865442   | 8624028   |
| EIC     | Negative | 608.3942 | 6.23 | unknown | 1295248   | 1015416   | 1277070   | 1030206   | 874713    | 1228792   | 1063029   | 999104    | 816325    | 863291    | 997474    | 1209614   | 869643    | 930575    | 1276510   | 982821    | 907984    | 865313    | 973108    |
| EIC     | Negative | 578.3467 | 4.35 | unknown | 151756064 | 176065269 | 165496008 | 145053712 | 152612678 | 164204309 | 149169611 | 156790082 | 153235615 | 147270092 | 180785899 | 162308184 | 158743125 | 185084309 | 153585928 | 152253779 | 150577003 | 150191950 | 173352908 |
| fpHILIC | Negative | 250.1448 | 0.41 | unknown | 866061    | 435059    | 279806    | 1086193   | 664828    | 912707    | 664470    | 407172    | 295388    | 644185    | 750611    | 1048235   | 710053    | 346017    | 657815    | 737790    | 59876     | 412476    | 556713    |
| EIC     | Negative | 528.2853 | 4.04 | unknown | 135426    | 255159    | 145487    | 158440    | 175377    | 227947    | 218853    | 148744    | 127654    | 113767    | 194342    | 222746    | 207700    | 201775    | 202943    | 165809    | 216069    | 124865    | 182075    |
| EIC     | Negative | 387.2125 | 3.22 | unknown | 165443    | 239658    | 169051    | 150926    | 219865    | 165597    | 159342    | 179348    | 147563    | 143006    | 156916    | 150964    | 158363    | 143503    | 179145    | 165148    | 169689    | 163603    | 199070    |
| EIC     | Negative | 253.1445 | 2.06 | unknown | 288842    | 314224    | 211702    | 200998    | 251839    | 222392    | 292314    | 173321    | 274939    | 241507    | 181480    | 230986    | 280516    | 235984    | 323765    | 328838    | 299015    | 124830    | 144819    |
| EIC     | Negative | 387.0262 | 0.48 | unknown | 79293181  | 81029760  | 90198001  | 89641813  | 71665741  | 77587249  | 81718424  | 82077852  | 84401501  | 86181970  | 81459905  | 78419184  | 83872180  | 39853981  | 77759097  | 82583882  | 80536198  | 80947481  | 77990813  |
| fpHILIC | Negative | 305.0737 | 3.21 | unknown | 3687637   | 2906637   | 2786754   | 3343888   | 2864183   | 3172453   | 2714924   | 2700421   | 30057208  | 3300512   | 2865652   | 2888259   | 2740743   | 2459044   | 2928467   | 2830124   | 2710066   | 3411695   | 2720794   |
| EIC     | Negative | 339.2539 | 3.96 | unknown | 99352     | 48768     | 73150     | 156601    | 47798     | 51882     | 85224     | 75462     | 762981    | 7198030   | 2417755   | 2122928   | 2544032   | 1975893   | 1835946   | 2305443   | 3717748   | 1789756   |           |
| EIC     | Negative | 286.2108 | 3.87 | unknown | 5504873   | 1626494   | 7251502   | 6930687   | 2312605   | 2138384   | 2558127   | 5896048   | 2212473   | 7629281   | 1819030   | 2417755   | 2122928   | 2544032   | 7536247   | 7349369   | 7449659   | 9392817   | 7049185   |
| EIC     | Negative | 299.2530 | 4.40 | unknown | 8841917   | 8381730   | 8687390   | 9141525   | 8470441   | 7010709   | 7301344   | 8284397   | 7628422   | 8680614   | 7069345   | 7101331   | 7537428   | 7261755   | 6480335   | 259262    | 719400    | 174507    | 470808    |
| EIC     | Negative | 429.2860 | 4.32 | unknown | 1198963   | 445805    | 576065    | 785875    | 219479    | 519614    | 367097    | 559334    | 589751    | 851783    | 499505    | 328180    | 370602    | 313996    | 6480335   | 259262    | 719400    | 174507    | 470808    |
| EIC     | Negative | 469.0291 | 0.48 | unknown | 55263884  | 58361996  | 64032983  | 63963230  | 49182861  | 54329926  | 58225470  | 57832579  | 60566334  | 60617400  | 58015747  | 56369156  | 59802382  | 21743349  | 54707786  | 58563663  | 5765081   | 57159839  | 54447740  |
| fpHILIC | Negative | 146.0458 | 2.32 | unknown | 4166872   | 2335396   | 2297644   | 3109304   | 2661257   | 3721694   | 2130634   | 2063714   | 2722313   | 3243351   | 3355884   | 3448551   | 2734160   | 2317547   | 3067251   | 2865583   | 2483738   | 2368786   | 2610976   |
| EIC     | Negative | 287.2232 | 3.21 | unknown | 353372    | 169797    | 443577    | 701951    | 787363    | 317104    | 234055    | 407173    | 2702133   | 3373351   | 249912    | 330088    | 271652    | 417661    | 137383    | 347252    | 281389    | 504207    | 248595    |
| EIC     | Negative | 337.2327 | 2.06 | unknown | 638962    | 652400    | 562891    | 4442580   | 597219    | 585942    | 650379    | 450982    | 572908    | 539766    | 638206    | 634589    | 540227    | 541113    | 575039    | 694484    | 643593    | 404193    | 579171    |
| EIC     | Negative | 504.3067 | 4.35 | unknown | 1091989   | 1293007   | 1179627   | 1108530   | 1017141   | 1185034   | 11478624  | 1045753   | 1240383   | 1376690   | 1626480   | 1159542   | 1451948   | 1092535   | 1045753   | 1119542   | 1153460   | 930461    | 1341012   |
| EIC     | Negative | 373.1418 | 1.82 | unknown | 720152    | 415183    | 721408    | 0         | 355733    | 230515    | 378069    | 433708    | 269062    | 0         | 469482    | 452711    | 499800    | 205237    | 265354    | 693334    | 439453    | 0         | 282326    |
| EIC     | Negative | 254.1762 | 3.07 | unknown | 170067    | 121891    | 140183    | 207869    | 127158    | 169841    | 152543    | 124118    | 102877    | 155587    | 140690    | 179958    | 142908    | 111784    | 139139    | 163046    | 144645    | 133966    | 101438    |
| EIC     | Negative | 295.1818 | 3.71 | unknown | 962060    | 0         | 1033923   | 0         | 0         | 0         | 1017349   | 0         | 833058    | 474911    | 0         | 499903    | 457020    | 547601    | 569357    | 0         | 0         | 0         |           |
| EIC     | Negative | 235.1705 | 2.95 | unknown | 242579    | 223826    | 219010    | 221354    | 229188    | 202832    | 246422    | 218409    | 205890    | 220158    | 217191    | 210515    | 221151    | 199955    | 217281    | 236336    | 222261    | 208970    | 227773    |
| EIC     | Negative | 551.0325 | 0.48 | unknown | 40416975  | 43578156  | 48758948  | 47556003  | 35659600  | 40647501  | 42304302  | 43362618  | 44919504  | 44974243  | 43184916  | 41483112  | 45133129  | 12436091  | 39685627  | 43930813  | 42105173  | 42630777  | 40461420  |
| EIC     | Negative | 266.1483 | 2.62 | unknown | 739306    | 527975    | 1002725   | 404646    | 521485    | 826569    | 376029    | 725065    | 180304    | 1098732   | 614456    | 413722    | 327133    | 810563    | 603506    | 250692    | 361946    | 8555      |           |



|         |          |          |      |         |          |          |          |          |          |          |          |          |          |          |          |          |          |          |          |          |          |          |          |
|---------|----------|----------|------|---------|----------|----------|----------|----------|----------|----------|----------|----------|----------|----------|----------|----------|----------|----------|----------|----------|----------|----------|----------|
| EIC     | Negative | 574.7641 | 0.52 | unknown | 444764   | 405148   | 656346   | 630428   | 339062   | 426555   | 347079   | 390989   | 551595   | 413633   | 422206   | 395428   | 440192   | 59554    | 362329   | 515053   | 372908   | 486082   | 346679   |
| EIC     | Negative | 283.2283 | 6.22 | unknown | 391319   | 290270   | 405760   | 633424   | 252353   | 209087   | 273386   | 279716   | 322363   | 278184   | 278302   | 402152   | 471452   | 210806   | 210965   | 359828   | 257241   | 297976   | 229607   |
| EIC     | Negative | 275.1655 | 0.89 | unknown | 65741    | 0        | 83045    | 69536    | 0        | 74752    | 0        | 0        | 0        | 0        | 0        | 82654    | 0        | 0        | 99860    | 0        | 54617    | 0        | 0        |
| EIC     | Negative | 341.2699 | 4.28 | unknown | 66599    | 35911    | 144073   | 482779   | 61401    | 75094    | 79090    | 203077   | 105577   | 125552   | 98260    | 127211   | 137242   | 38017    | 48157    | 130573   | 87544    | 223486   | 42124    |
| EIC     | Negative | 373.0102 | 0.48 | unknown | 626836   | 626964   | 685994   | 629688   | 574383   | 636477   | 592235   | 581893   | 724458   | 696039   | 632950   | 683056   | 569683   | 314876   | 624995   | 609056   | 684098   | 687697   | 550618   |
| EIC     | Negative | 458.8488 | 0.52 | unknown | 405883   | 475812   | 594340   | 646052   | 391003   | 482579   | 444364   | 420668   | 530824   | 417053   | 496008   | 466796   | 486208   | 107387   | 419619   | 522563   | 462338   | 520653   | 378580   |
| EIC     | Negative | 578.3467 | 4.89 | unknown | 13903598 | 18679352 | 18709044 | 12980088 | 13645377 | 17591921 | 16947030 | 15094941 | 11957886 | 13066879 | 18214431 | 18719663 | 15445291 | 20100508 | 14887064 | 16291006 | 14267273 | 13833008 | 20723213 |
| EIC     | Negative | 325.6600 | 4.98 | unknown | 1453191  | 1433745  | 1425588  | 1639498  | 1473663  | 1351685  | 1384792  | 194212   | 1418128  | 1495113  | 1390591  | 1420064  | 1457528  | 1308854  | 1487821  | 1482044  | 1441983  | 1486149  | 1338607  |
| EIC     | Negative | 317.1146 | 0.92 | unknown | 784423   | 502269   | 973849   | 911422   | 422455   | 332333   | 576246   | 760398   | 317387   | 970319   | 670631   | 546796   | 624745   | 247326   | 356765   | 545412   | 387583   | 905924   | 250886   |
| EIC     | Negative | 295.1552 | 2.43 | unknown | 1958828  | 1473643  | 1523829  | 1546905  | 1493526  | 1331050  | 1401652  | 1556248  | 1504313  | 1537362  | 1447733  | 1454310  | 1636610  | 1363688  | 1345789  | 1743568  | 1416023  | 1482378  | 1414097  |
| EIC     | Negative | 256.1638 | 2.37 | unknown | 169732   | 78533    | 142936   | 147427   | 73552    | 103625   | 76684    | 108720   | 47001    | 141394   | 62781    | 82456    | 72362    | 58550    | 84108    | 71303    | 58408    | 142105   | 60241    |
| EIC     | Negative | 263.1291 | 2.28 | unknown | 1003656  | 331766   | 1222294  | 352754   | 235175   | 432393   | 235978   | 624090   | 87333    | 1149762  | 269219   | 301386   | 129753   | 393228   | 362932   | 134911   | 179783   | 629882   | 333683   |
| EIC     | Negative | 502.6319 | 0.63 | unknown | 272023   | 198590   | 565195   | 382477   | 213414   | 249388   | 184387   | 139160   | 314100   | 688228   | 193684   | 173486   | 221254   | 97938    | 166933   | 240472   | 164996   | 267242   | 278963   |
| EIC     | Negative | 329.2877 | 4.97 | unknown | 366183   | 378284   | 347583   | 394258   | 370745   | 358287   | 363130   | 368527   | 355826   | 372045   | 357214   | 366943   | 375358   | 334633   | 365148   | 387208   | 375136   | 383205   | 335931   |
| EIC     | Negative | 637.3536 | 5.27 | unknown | 809516   | 757919   | 693311   | 730538   | 665721   | 556801   | 680146   | 684934   | 694173   | 744471   | 673738   | 709725   | 723230   | 669968   | 720112   | 668468   | 638138   | 632699   | 677344   |
| EIC     | Negative | 312.2630 | 6.50 | unknown | 194335   | 174493   | 392380   | 877853   | 217456   | 149369   | 249311   | 245294   | 219333   | 338615   | 473997   | 318492   | 318161   | 61011    | 122927   | 294753   | 253365   | 301344   | 121036   |
| EIC     | Negative | 286.7722 | 0.52 | unknown | 262724   | 65563    | 206804   | 134917   | 258964   | 158171   | 117687   | 76738    | 125806   | 406210   | 78585    | 68681    | 96566    | 1408565  | 116356   | 140649   | 42429    | 125048   | 325358   |
| fpHILIC | Positive | 193.0949 | 3.13 | unknown | 631616   | 873378   | 845230   | 749496   | 760734   | 812812   | 703157   | 836781   | 746511   | 602120   | 752363   | 901211   | 665839   | 929866   | 795932   | 746510   | 725464   | 766072   | 855949   |
| fpHILIC | Positive | 499.3497 | 0.60 | unknown | 2332852  | 3173672  | 2357815  | 2554551  | 2519797  | 2530184  | 2893930  | 2028613  | 2754934  | 2165598  | 3082441  | 2899088  | 3389052  | 3085156  | 281390   | 3019523  | 2296226  | 2068909  | 2748635  |
| fpHILIC | Positive | 148.0794 | 3.47 | unknown | 30663828 | 22273982 | 25872270 | 26871026 | 21599718 | 22741054 | 22731554 | 22576062 | 25747088 | 23615502 | 23266796 | 21382192 | 21824688 | 19508372 | 24905168 | 21168046 | 25762802 | 24118900 | 21440974 |
| fpHILIC | Negative | 182.0538 | 1.76 | unknown | 2098955  | 885205   | 1044764  | 1434885  | 842607   | 511066   | 847920   | 867310   | 857241   | 1470811  | 1024859  | 1085504  | 969380   | 1262584  | 923982   | 950261   | 991180   | 1268122  | 879278   |
| EIC     | Negative | 347.2593 | 6.22 | unknown | 330555   | 155115   | 221959   | 354301   | 135633   | 227037   | 135421   | 227490   | 310736   | 256772   | 123339   | 216564   | 186097   | 67187    | 154977   | 243619   | 257218   | 215299   | 183447   |
| EIC     | Negative | 339.9407 | 0.52 | unknown | 249165   | 259829   | 279252   | 334289   | 229744   | 236049   | 285300   | 324787   | 268983   | 379024   | 263425   | 316105   | 294850   | 75620    | 236604   | 275690   | 304987   | 296417   | 255770   |
| EIC     | Negative | 557.3563 | 5.09 | unknown | 1940142  | 2000536  | 1888977  | 2031327  | 1881032  | 1940998  | 1950109  | 2034164  | 2085274  | 1829034  | 2201889  | 2026243  | 1897535  | 2184051  | 2053777  | 2064718  | 1824544  | 1912544  | 2196296  |
| fpHILIC | Negative | 369.1096 | 3.20 | unknown | 1107723  | 1172848  | 1330493  | 1303715  | 1049058  | 1051115  | 998229   | 1124452  | 1126794  | 1245484  | 1193490  | 1170582  | 977361   | 969016   | 1228179  | 1002847  | 986516   | 1189443  | 1039544  |
| EIC     | Negative | 319.1897 | 5.15 | unknown | 598883   | 348278   | 1051326  | 1319715  | 175767   | 88396    | 124029   | 240452   | 146318   | 636835   | 159734   | 1360458  | 202099   | 171079   | 99896    | 132101   | 90818    | 209300   | 228825   |
| EIC     | Negative | 251.1288 | 2.74 | unknown | 346038   | 355307   | 190681   | 508513   | 331800   | 255621   | 194247   | 169391   | 197998   | 507500   | 164746   | 187661   | 233426   | 107189   | 200482   | 271091   | 181452   | 411055   | 106115   |
| EIC     | Negative | 370.9448 | 0.55 | unknown | 662449   | 155946   | 260530   | 469092   | 158666   | 474513   | 213995   | 91319    | 152646   | 335097   | 220555   | 207267   | 168288   | 75885    | 89861    | 297459   | 109200   | 203832   | 308387   |
| EIC     | Negative | 555.2726 | 5.62 | unknown | 2868821  | 2277168  | 2752383  | 3055926  | 2081660  | 1643951  | 1917729  | 2024765  | 1570796  | 2503869  | 1487157  | 1430121  | 1921882  | 1545591  | 1599621  | 1571877  | 1938596  | 2871828  | 1430231  |
| EIC     | Negative | 265.1087 | 2.22 | unknown | 83558    | 60090    | 69636    | 81652    | 56230    | 53288    | 57327    | 92208    | 53559    | 101777   | 56299    | 65823    | 46139    | 52361    | 52361    | 47596    | 84545    | 65071    | 0        |
| fpHILIC | Negative | 124.0150 | 2.98 | unknown | 488720   | 458978   | 447018   | 549582   | 338323   | 531295   | 357396   | 270322   | 300945   | 417798   | 331796   | 283165   | 423945   | 156414   | 298054   | 403360   | 409066   | 393850   | 327958   |
| EIC     | Negative | 252.1606 | 2.64 | unknown | 6757879  | 4565252  | 3457509  | 7616593  | 5360087  | 8557234  | 5373789  | 3922453  | 3709610  | 4726606  | 6096739  | 6424270  | 4992008  | 2290439  | 7422372  | 6295179  | 6707878  | 3938900  | 3070077  |
| fpHILIC | Positive | 495.3270 | 0.61 | unknown | 3862228  | 3432979  | 3350190  | 2909829  | 3305700  | 2954329  | 3742574  | 2569212  | 2700818  | 2659423  | 2874009  | 3845052  | 3513110  | 3281184  | 3338094  | 3154038  | 3947265  | 2729040  | 2402743  |
| EIC     | Negative | 464.2785 | 4.89 | unknown | 891521   | 1003133  | 1126265  | 637070   | 733819   | 1045278  | 812212   | 850659   | 414291   | 643417   | 739177   | 733861   | 561906   | 1278746  | 849589   | 442667   | 707074   | 851182   | 1079167  |
| fpHILIC | Positive | 273.0462 | 2.70 | unknown | 310144   | 316759   | 238552   | 394951   | 324099   | 346755   | 319513   | 175136   | 288161   | 283404   | 318257   | 347580   | 251587   | 158340   | 294768   | 229582   | 201419   | 238769   | 517855   |
| fpHILIC | Positive | 785.5869 | 0.43 | unknown | 16461353 | 15852007 | 17753570 | 13994723 | 11979605 | 13241882 | 12971873 | 14005408 | 10591790 | 13894232 | 13543558 | 12997641 | 11499192 | 17261466 | 13103127 | 11269436 | 11416118 | 14262029 | 13942623 |
| EIC     | Negative | 349.2011 | 4.37 | unknown | 302710   | 223983   | 4400415  | 498245   | 1400415  | 345484   | 178534   | 339472   | 340248   | 537899   | 292154   | 523899   | 406224   | 81657    | 91169    | 365096   | 308282   | 864844   | 1791621  |
| EIC     | Negative | 440.2470 | 6.09 | unknown | 117603   | 127396   | 103551   | 251239   | 77729    | 69178    | 85022    | 131895   | 144174   | 177660   | 134859   | 51025    | 120906   | 167836   | 95893    | 55513    | 146484   | 139486   | 80518    |
| EIC     | Negative | 579.3498 | 4.89 | unknown | 4425173  | 5814786  | 6010027  | 4091145  | 4359847  | 5587532  | 5319955  | 4654125  | 3788645  | 4048850  | 5751012  | 5813791  | 4940528  | 6328526  | 4679377  | 40107620 | 4521834  | 4372257  | 6581287  |
| EIC     | Negative | 508.9095 | 0.55 | unknown | 297038   | 75063    | 187331   | 237281   | 91945    | 231758   | 132926   | 13145    | 135577   | 179935   | 108686   | 98143    | 103941   | 0        | 92719    | 153204   | 72928    | 105978   | 169915   |
| EIC     | Negative | 616.2505 | 1.03 | unknown | 143727   | 78952    | 222583   | 126234   | 71298    | 43185    | 103712   | 128838   | 100973   | 69349    | 82963    | 130649   | 42566    | 69349    | 82963    | 130649   | 42566    | 154279   | 38820    |
| EIC     | Negative | 363.2549 | 5.88 | unknown | 1724510  | 1066615  | 1985881  | 1841208  | 1172676  | 703597   | 880059   | 1703826  | 914798   | 2309989  | 1165533  | 793032   | 902700   | 909707   | 1137400  | 944338   | 901495   | 1663043  | 834505   |
| EIC     | Negative | 323.2501 | 5.21 | unknown | 13721538 | 3635866  | 3488901  | 3725221  | 3554376  | 3523852  | 3252366  | 3628280  | 3266778  | 3487599  | 3422186  | 3266726  | 3438761  | 3060643  | 3458513  | 3713837  | 3417338  | 3568193  | 3409155  |
| EIC     | Negative | 381.2567 | 4.40 | unknown | 609371   | 523623   | 537230   | 426032   | 559163   | 425163   | 453723   | 525735   | 475207   | 660371   | 812590   | 468373   | 531132   | 481924   | 494460   | 497533   | 460122   | 584406   | 450893   |
| fpHILIC | Negative | 819.5577 | 0.43 | unknown | 9442158  | 9017557  | 7922106  | 6323034  | 7140362  | 6310956  | 5747288  | 6563615  | 8891174  | 6685028  | 8128024  | 7258093  | 6506452  | 9839019  | 8114044  | 6031667  | 6001800  | 5893849  | 9300685  |
| fpHILIC | Positive | 733.5567 | 0.44 | unknown | 482551   | 512852   | 748722   | 494172   | 384107   | 427257   | 345995   | 496784   | 603134   | 475727   | 507278   | 511522   | 445111   | 810525   | 431805   | 347238   | 542197   | 543889   | 437216   |
| fpHILIC | Negative | 844.5689 | 0.43 | unknown | 6724470  | 5848757  | 6695599  | 5989928  | 5031394  | 5307939  | 4826395  | 4939410  | 4342763  | 5198301  | 5024956  | 5186035  | 4915164  | 5728442  | 5507340  | 4291978  | 4690753  | 5017179  | 5548590  |
| EIC     | Negative | 566.3472 | 5.16 | unknown | 380813   | 428715   | 365678   | 367876   | 447700   | 433667   | 437408   | 381584   | 349538   | 359043   | 445374   |          |          |          |          |          |          |          |          |

|         |          |          |      |         |           |           |           |           |           |           |           |           |           |           |           |           |           |           |           |          |           |           |           |
|---------|----------|----------|------|---------|-----------|-----------|-----------|-----------|-----------|-----------|-----------|-----------|-----------|-----------|-----------|-----------|-----------|-----------|-----------|----------|-----------|-----------|-----------|
| EIC     | Negative | 406.2534 | 5.66 | unknown | 124568    | 146051    | 118744    | 187212    | 127398    | 132984    | 138803    | 119160    | 111916    | 135874    | 133768    | 145398    | 165241    | 113380    | 137287    | 135409   | 127394    | 145761    | 101085    |
| EIC     | Negative | 319.1556 | 3.15 | unknown | 524942    | 138649    | 544246    | 448634    | 171204    | 199456    | 246201    | 388138    | 94856     | 507086    | 176053    | 248993    | 169457    | 116515    | 152712    | 136086   | 177080    | 484596    | 178846    |
| EIC     | Negative | 501.3013 | 3.81 | unknown | 480914    | 180871    | 512308    | 1105082   | 233890    | 346918    | 421638    | 603031    | 566627    | 603015    | 351109    | 338487    | 636161    | 31632     | 205078    | 426132   | 431463    | 1167720   | 0         |
| EIC     | Negative | 297.1718 | 2.53 | unknown | 473390    | 191349    | 406940    | 212029    | 103577    | 164683    | 143101    | 314024    | 71527     | 350106    | 177705    | 118551    | 118528    | 156632    | 106468    | 83690    | 86289     | 381658    | 160325    |
| EIC     | Negative | 374.2913 | 3.22 | unknown | 556427    | 671549    | 572542    | 759689    | 687749    | 677359    | 566574    | 623136    | 649921    | 672901    | 679054    | 645208    | 649230    | 556920    | 585840    | 828778   | 610032    | 612855    | 654277    |
| fpHILIC | Negative | 160.0615 | 1.66 | unknown | 158126    | 3004156   | 0         | 3751226   | 0         | 4304793   | 2808077   | 0         | 0         | 0         | 4363097   | 4766060   | 0         | 0         | 3095805   | 4211376  | 0         | 0         | 0         |
| fpHILIC | Positive | 240.1014 | 1.67 | unknown | 613457    | 693216    | 720367    | 745652    | 457871    | 578105    | 647946    | 550950    | 653014    | 658758    | 712152    | 675302    | 646710    | 507356    | 621920    | 746077   | 445149    | 585717    | 568706    |
| fpHILIC | Negative | 195.9262 | 4.55 | unknown | 1192816   | 1003057   | 1006201   | 1094570   | 824163    | 1136359   | 916965    | 931982    | 1031313   | 1267355   | 966433    | 1031377   | 1018739   | 935505    | 1132326   | 1031687  | 853702    | 935293    | 1022341   |
| EIC     | Negative | 263.1654 | 3.90 | unknown | 191137    | 93182     | 332122    | 153842    | 104744    | 86058     | 122750    | 174394    | 78130     | 223167    | 134944    | 116610    | 109611    | 106644    | 96873     | 70751    | 86266     | 216241    | 111724    |
| EIC     | Negative | 504.3134 | 4.00 | unknown | 0         | 0         | 332808    | 706393    | 15614     | 0         | 0         | 0         | 0         | 593648    | 0         | 0         | 0         | 0         | 16050     | 0        | 0         | 0         | 0         |
| EIC     | Negative | 313.2027 | 2.41 | unknown | 198612    | 71585     | 210124    | 114906    | 65824     | 83701     | 69251     | 144439    | 48731     | 165044    | 74631     | 73263     | 59037     | 56695     | 68917     | 69915    | 68323     | 141921    | 74501     |
| EIC     | Negative | 352.1751 | 2.44 | unknown | 312751    | 133682    | 160114    | 234796    | 177668    | 176790    | 148832    | 261387    | 194574    | 196322    | 162715    | 178304    | 144947    | 141822    | 167248    | 136853   | 154430    | 410351    | 117835    |
| EIC     | Negative | 319.2640 | 5.88 | unknown | 836974    | 519072    | 933253    | 881320    | 569075    | 343715    | 452739    | 807072    | 462846    | 1112129   | 593151    | 396242    | 463359    | 452055    | 591106    | 467535   | 445296    | 799170    | 407924    |
| EIC     | Negative | 326.2001 | 3.09 | unknown | 266717    | 114235    | 185013    | 332038    | 164749    | 215918    | 145444    | 215918    | 131597    | 235246    | 94434     | 230386    | 176240    | 222577    | 161418    | 159206   | 181207    | 238832    | 141298    |
| EIC     | Negative | 480.8962 | 0.52 | unknown | 1086799   | 1274974   | 1203691   | 1431196   | 798095    | 1012915   | 1099617   | 1331154   | 1197005   | 951871    | 12107052  | 1371088   | 1248701   | 161422    | 970054    | 1080872  | 1172785   | 1250395   | 1122480   |
| fpHILIC | Negative | 594.3404 | 0.62 | unknown | 2059432   | 2597943   | 2918702   | 1838329   | 1704206   | 2720560   | 2039387   | 2066176   | 1547004   | 1623707   | 2316047   | 2224835   | 2070491   | 2336195   | 1865490   | 1657817  | 1632563   | 2161396   | 3052824   |
| EIC     | Negative | 278.1839 | 3.13 | unknown | 675875    | 347757    | 581242    | 478240    | 0         | 471358    | 433959    | 498332    | 0         | 565150    | 499582    | 555223    | 394927    | 0         | 518161    | 0        | 432104    | 494169    | 0         |
| EIC     | Negative | 255.1604 | 2.45 | unknown | 512691    | 291748    | 525664    | 593296    | 303481    | 333183    | 303637    | 300174    | 303825    | 99381     | 247417    | 337208    | 356281    | 259156    | 272962    | 343053   | 287254    | 566863    | 234636    |
| EIC     | Negative | 327.2727 | 4.01 | unknown | 382116    | 324556    | 301314    | 316862    | 329552    | 337768    | 345895    | 316073    | 303825    | 292992    | 616544    | 326754    | 307146    | 333994    | 308632    | 355717   | 332777    | 356702    | 326987    |
| fpHILIC | Negative | 146.0651 | 3.47 | unknown | 9257249   | 5925570   | 7639285   | 6729111   | 5707488   | 6262063   | 6108204   | 6077079   | 508110    | 6860115   | 6029740   | 6287811   | 5693778   | 4535227   | 7357454   | 5795120  | 6601910   | 7407164   | 4323179   |
| EIC     | Negative | 636.3501 | 5.27 | unknown | 2301463   | 2241621   | 2132761   | 2077572   | 1976310   | 1750952   | 2010747   | 2070603   | 2181598   | 2159809   | 2176032   | 2277798   | 2238818   | 2084484   | 2241206   | 2177548  | 2011782   | 1800949   | 2052299   |
| fpHILIC | Positive | 229.1546 | 2.03 | unknown | 3993114   | 3128676   | 2243111   | 3865372   | 2524413   | 3644919   | 2870750   | 1682911   | 3062717   | 2800184   | 2890989   | 3324907   | 3050500   | 2120547   | 2731292   | 4412447  | 2260597   | 2605097   | 2192951   |
| fpHILIC | Positive | 175.1190 | 5.38 | unknown | 54862160  | 52207740  | 37747520  | 40414576  | 44586832  | 57423480  | 46470476  | 36142392  | 42173936  | 33076006  | 43138776  | 46869676  | 50216416  | 44944368  | 65776228  | 56984972 | 53129420  | 34685776  | 41088288  |
| EIC     | Negative | 579.3498 | 4.49 | unknown | 7582616   | 8806299   | 10334847  | 7146087   | 6913476   | 7781443   | 7067400   | 7346153   | 6853409   | 7101495   | 8958405   | 7915550   | 7263904   | 10456002  | 7164884   | 7375416  | 6459795   | 7280663   | 8777204   |
| fpHILIC | Positive | 343.1889 | 2.39 | unknown | 1007906   | 806349    | 822116    | 755562    | 829248    | 838390    | 946968    | 695717    | 719265    | 871999    | 957966    | 833051    | 881852    | 876423    | 881079    | 1819916  | 781813    | 980790    | 689596    |
| fpHILIC | Positive | 247.1279 | 3.02 | unknown | 1679955   | 720430    | 772216    | 867321    | 708465    | 10450768  | 695079    | 438890    | 578320    | 764072    | 900821    | 926341    | 796284    | 776995    | 885993    | 913542   | 688508    | 616505    | 886449    |
| fpHILIC | Positive | 148.0734 | 3.48 | unknown | 3828256   | 3268924   | 3461595   | 3592235   | 2787761   | 3445419   | 2853660   | 2878994   | 3576112   | 3413552   | 3523607   | 2826389   | 3058265   | 2423909   | 3800380   | 3047880  | 3357592   | 3228874   | 2953011   |
| EIC     | Negative | 299.2313 | 4.60 | unknown | 365489    | 227512    | 563107    | 400413    | 316659    | 320088    | 530391    | 346135    | 353633    | 301219    | 214075    | 242303    | 231903    | 362804    | 200140    | 618206   | 407592    | 436643    | 235371    |
| EIC     | Negative | 478.2843 | 4.68 | unknown | 9523400   | 10109178  | 10148086  | 8018106   | 7687468   | 9468654   | 7403413   | 8172865   | 5778246   | 7114843   | 8233044   | 7505998   | 6248732   | 18086498  | 8679091   | 4394815  | 7553552   | 9262907   | 9832776   |
| EIC     | Negative | 241.0506 | 2.39 | unknown | 5509545   | 4126674   | 5158407   | 5774095   | 3691900   | 3951830   | 4124509   | 5122375   | 3565658   | 5379195   | 3786147   | 4053182   | 3966248   | 4089158   | 3973475   | 3964881  | 3927933   | 5330594   | 3909157   |
| EIC     | Negative | 313.1197 | 1.06 | unknown | 373386    | 162628    | 226698    | 258361    | 137749    | 140227    | 162159    | 313302    | 153017    | 318730    | 155086    | 212829    | 190611    | 152376    | 152015    | 198053   | 175299    | 279877    | 130098    |
| EIC     | Negative | 637.3536 | 5.04 | unknown | 708466    | 497787    | 603111    | 598294    | 463755    | 411899    | 556333    | 621342    | 606764    | 709660    | 475708    | 547856    | 509541    | 522083    | 554702    | 539176   | 528551    | 658367    | 465471    |
| fpHILIC | Positive | 787.6059 | 0.43 | unknown | 20134682  | 19738960  | 24368056  | 19585688  | 20083122  | 18671686  | 17544124  | 24263556  | 15452994  | 20386776  | 20788256  | 18493914  | 16185466  | 233103242 | 19775330  | 16479713 | 19430524  | 22369636  | 21087972  |
| EIC     | Negative | 327.1601 | 1.83 | unknown | 375149    | 477258    | 283789    | 0         | 184439    | 155985    | 209944    | 26574     | 306589    | 0         | 139516    | 168860    | 147576    | 138903    | 215990    | 405890   | 218455    | 0         | 72045     |
| EIC     | Negative | 417.2278 | 4.56 | unknown | 738052    | 572793    | 851394    | 656514    | 487752    | 481929    | 331528    | 508941    | 578767    | 687324    | 404187    | 659884    | 427135    | 441860    | 351019    | 581360   | 505578    | 643995    | 384999    |
| fpHILIC | Positive | 330.1760 | 2.70 | unknown | 312355    | 406882    | 396712    | 276009    | 333287    | 335858    | 390468    | 292495    | 349646    | 315426    | 337533    | 345835    | 373967    | 541637    | 325178    | 326573   | 312105    | 863514    | 420662    |
| fpHILIC | Positive | 311.1229 | 3.54 | unknown | 1139469   | 726153    | 826907    | 740143    | 562070    | 957720    | 564813    | 560270    | 515637    | 905284    | 830329    | 513935    | 479198    | 740319    | 613635    | 557480   | 610700    | 333484    | 587214    |
| EIC     | Negative | 288.1637 | 2.64 | unknown | 483504    | 134958    | 0         | 37474     | 56390     | 186254    | 291138    | 0         | 111975    | 42234     | 192197    | 203619    | 189346    | 111148    | 191354    | 153728   | 235058    | 0         | 86924     |
| EIC     | Negative | 429.2862 | 3.34 | unknown | 649545    | 258688    | 361358    | 524887    | 173748    | 273688    | 427313    | 358403    | 401225    | 842122    | 224935    | 262416    | 282971    | 407446    | 462245    | 262416   | 282971    | 221380    | 221025    |
| EIC     | Negative | 331.1193 | 3.46 | unknown | 1604121   | 1527714   | 1666496   | 1636756   | 1269377   | 1108789   | 1447857   | 1495426   | 1325384   | 1759184   | 1455056   | 1465765   | 1400081   | 1292698   | 1684984   | 1618335  | 1114081   | 1343557   | 1019043   |
| fpHILIC | Negative | 274.1409 | 4.35 | unknown | 536791    | 477231    | 297632    | 337790    | 390407    | 700859    | 350944    | 487580    | 279527    | 322847    | 588838    | 569473    | 376101    | 472870    | 500863    | 567631   | 308630    | 290668    | 310643    |
| fpHILIC | Negative | 207.0144 | 4.21 | unknown | 3703655   | 1207904   | 452390    | 1843927   | 1990607   | 2841979   | 1650892   | 761485    | 2187214   | 537982    | 1005837   | 2684197   | 1820429   | 1309785   | 1700346   | 2923384  | 2238518   | 1279910   | 1609044   |
| fpHILIC | Positive | 496.2795 | 0.60 | unknown | 2019528   | 2521235   | 1915187   | 1947212   | 2116079   | 1945732   | 2102332   | 1671717   | 1196951   | 2428735   | 2291321   | 2677977   | 2448165   | 2491657   | 2531084   | 2346691  | 1541971   | 22108974  | 0         |
| fpHILIC | Positive | 302.2149 | 0.61 | unknown | 2369099   | 683112    | 1327203   | 2248761   | 807822    | 886314    | 1256742   | 1436084   | 803519    | 1284986   | 1108937   | 976509    | 971143    | 190961    | 702566    | 1056523  | 897078    | 2211766   | 499463    |
| EIC     | Negative | 376.8464 | 0.52 | unknown | 615695    | 531268    | 835412    | 824825    | 529318    | 605410    | 513599    | 354323    | 617017    | 682338    | 523447    | 496450    | 542890    | 167919    | 472546    | 609387   | 500020    | 578189    | 548822    |
| EIC     | Negative | 476.2785 | 4.68 | unknown | 205372816 | 208704751 | 219450424 | 172033686 | 160200475 | 203634827 | 154771155 | 175795069 | 120219310 | 156547436 | 173991869 | 157927214 | 134334018 | 227747963 | 185281078 | 91559791 | 164337636 | 191756651 | 209486576 |
| EIC     | Negative | 450.9511 | 0.55 | unknown | 674472    | 233974    | 339100    | 582373    | 167321    | 570953    | 290480    | 93194     | 187301    | 327152    | 284662    | 302428    | 201786    | 74374     | 230423    | 380316   | 162216    | 261858    | 314793    |
| EIC     | Negative | 478.2943 | 5.54 | unknown | 84125669  | 100424174 | 86610179  | 69395287  | 80373980  | 102621218 | 75913593  | 76212527  | 51506499  | 57397689  | 64551     |           |           |           |           |          |           |           |           |

|         |          |          |        |         |           |           |           |           |           |           |           |           |           |           |           |           |           |           |           |           |           |           |           |
|---------|----------|----------|--------|---------|-----------|-----------|-----------|-----------|-----------|-----------|-----------|-----------|-----------|-----------|-----------|-----------|-----------|-----------|-----------|-----------|-----------|-----------|-----------|
| EIC     | Negative | 541.3347 | 4.46   | unknown | 2630817   | 2270438   | 2159754   | 2194357   | 1957249   | 2050256   | 1838791   | 1870242   | 2242105   | 2240327   | 2129713   | 2219234   | 2112580   | 2120189   | 2049360   | 2492385   | 1829375   | 2009385   | 1986004   |
| EIC     | Negative | 406.2604 | 5.21   | unknown | 507806    | 426017    | 424370    | 416023    | 447098    | 466719    | 431636    | 469646    | 372165    | 465921    | 476539    | 428693    | 469613    | 417232    | 469364    | 463251    | 421101    | 464425    | 459259    |
| fpHILIC | Positive | 144.0805 | 2.07   | unknown | 731933    | 314911    | 486786    | 342203    | 315387    | 278367    | 304519    | 275158    | 282260    | 361808    | 354056    | 302266    | 279175    | 505039    | 463306    | 284033    | 257616    | 363814    | 196692    |
| fpHILIC | Positive | 263.1687 | 2.25   | unknown | 234919    | 430467    | 247586    | 310099    | 340086    | 279377    | 360292    | 265683    | 281197    | 248928    | 310681    | 381505    | 277651    | 228687    | 260134    | 351474    | 260451    | 387242    | 330663    |
| fpHILIC | Negative | 172.0250 | 3.88   | unknown | 570228    | 420444    | 627932    | 867274    | 310827    | 427700    | 486696    | 692176    | 431309    | 242531    | 289896    | 659559    | 763084    | 0         | 468898    | 674605    | 405634    |           |           |
| EIC     | Negative | 229.1442 | 2.10   | unknown | 224328    | 204785    | 250650    | 208132    | 182599    | 189749    | 222117    | 200285    | 207121    | 309802    | 259206    | 244127    | 363528    | 116720    | 217164    | 229370    | 275221    | 168813    | 153714    |
| EIC     | Negative | 275.1620 | 0.89   | unknown | 68459     | 110656    | 92297     | 71184     | 58612     | 80041     | 71752     | 83478     | 46275     | 58432     | 57584     | 85241     | 68721     | 50759     | 62042     | 104370    | 369958    | 58730     | 66089     |
| EIC     | Negative | 288.9420 | 0.55   | unknown | 546104    | 100409    | 172649    | 306810    | 91020     | 346706    | 145002    | 32542     | 151147    | 284646    | 138120    | 129781    | 56196     | 90496     | 129360    | 197947    | 78564     | 127797    | 265222    |
| fpHILIC | Positive | 205.0816 | 3.85   | unknown | 2054918   | 716866    | 890604    | 1903973   | 751185    | 1275998   | 754835    | 777663    | 751551    | 914289    | 840029    | 953140    | 966977    | 599767    | 716067    | 1128738   | 986737    | 881836    | 780847    |
| fpHILIC | Negative | 144.1112 | 0.45   | unknown | 437019    | 283538    | 564020    | 555001    | 395854    | 391380    | 319651    | 385623    | 336465    | 397846    | 280053    | 396339    | 307541    | 310388    | 300033    | 375572    | 404949    | 513383    | 312693    |
| EIC     | Negative | 380.8154 | 0.65   | unknown | 245014    | 92535     | 131107    | 249837    | 58750     | 177972    | 96418     | 46134     | 66533     | 143728    | 102624    | 118341    | 89828     | 33057     | 73078     | 115986    | 60514     | 84958     | 130295    |
| fpHILIC | Positive | 149.0456 | 2.48   | unknown | 683622    | 691615    | 737077    | 351952    | 380350    | 589068    | 377312    | 344847    | 340344    | 495853    | 503136    | 515464    | 375069    | 719760    | 479056    | 329257    | 412604    | 433413    | 465422    |
| fpHILIC | Positive | 520.3403 | 0.60   | unknown | 383323168 | 394942528 | 478174720 | 355023648 | 308324064 | 378886464 | 362608896 | 369770560 | 269561568 | 315178016 | 418279584 | 398481536 | 364397472 | 432863744 | 313779456 | 304237568 | 339842368 | 386536480 | 418069600 |
| EIC     | Negative | 1089555  | 345752 | 880932  | 900255    | 327177    | 393318    | 433933    | 660455    | 287503    | 1170034   | 341414    | 487818    | 405001    | 347293    | 372338    | 399569    | 329565    | 820681    | 272574    |           |           |           |
| EIC     | Negative | 265.1449 | 2.62   | unknown | 4381507   | 3669588   | 8535314   | 2640378   | 3748459   | 4998491   | 2627988   | 3695371   | 1099045   | 6121300   | 3642555   | 2987307   | 1469264   | 4831987   | 3936227   | 1816127   | 2134855   | 5210852   | 3781549   |
| fpHILIC | Positive | 786.5998 | 0.43   | unknown | 42646264  | 42913056  | 50660840  | 40849884  | 40872592  | 41489220  | 35732548  | 53250992  | 31655394  | 45369668  | 43645212  | 39972444  | 34432196  | 52140028  | 42958136  | 35096156  | 38668760  | 48381000  | 46903976  |
| fpHILIC | Negative | 98.9559  | 4.56   | unknown | 3955875   | 3138924   | 3398721   | 3618799   | 2690449   | 3595319   | 2268681   | 3042052   | 3528826   | 4068587   | 3042351   | 3337558   | 3618174   | 2851810   | 3649809   | 3747586   | 2674768   | 3134571   | 3221347   |
| fpHILIC | Negative | 211.1705 | 0.39   | unknown | 1509351   | 871057    | 1714589   | 2924184   | 1022728   | 1068639   | 1224144   | 1311917   | 1775628   | 816990    | 1547100   | 1790917   | 572541    | 788750    | 1123985   | 1264703   | 2268891   | 675505    |           |
| EIC     | Negative | 325.2745 | 5.83   | unknown | 1137906   | 1143003   | 2309572   | 2564048   | 1582879   | 951782    | 1145782   | 1812983   | 1176161   | 1186133   | 1297162   | 1257092   | 1265017   | 1672282   | 1385233   | 808451    | 1224455   | 3232858   | 1228078   |
| fpHILIC | Negative | 200.1292 | 0.45   | unknown | 3112916   | 1748013   | 2159471   | 3290297   | 1674920   | 2369819   | 2195872   | 1602598   | 1932933   | 2690108   | 1922236   | 2323457   | 3937368   | 875708    | 1968948   | 2819329   | 1939084   | 2505984   | 984774    |
| EIC     | Negative | 318.1789 | 1.78   | unknown | 199267    | 107340    | 185313    | 82755     | 52779     | 82151     | 117384    | 66258     | 37961     | 125963    | 133017    | 173616    | 172581    | 82909     | 72089     | 140138    | 101490    | 0         | 59198     |
| fpHILIC | Positive | 163.1153 | 2.92   | unknown | 53660316  | 53508776  | 47381936  | 32754484  | 30817130  | 49173984  | 41359608  | 31680352  | 25115956  | 36206436  | 45152368  | 44980592  | 35758012  | 36586228  | 42020368  | 33268290  | 33153284  | 34650228  | 44914288  |
| EIC     | Negative | 585.0388 | 0.49   | unknown | 1520411   | 1652953   | 1921429   | 1822714   | 1376473   | 1514835   | 1582546   | 1640203   | 1699892   | 1669542   | 1737491   | 1562996   | 1773582   | 110695    | 1531876   | 1745417   | 1655459   | 1674429   | 1559887   |
| EIC     | Negative | 253.2075 | 5.12   | unknown | 351665    | 164650    | 620249    | 292126    | 162611    | 178707    | 234879    | 439173    | 47619     | 380021    | 189223    | 185795    | 164342    | 209587    | 176682    | 103363    | 171259    | 419349    | 241931    |
| fpHILIC | Positive | 221.0911 | 2.61   | unknown | 1597110   | 1873872   | 1729694   | 1114255   | 1584665   | 1680455   | 1777836   | 1212756   | 1316716   | 1344593   | 1793162   | 1584663   | 1608889   | 1976125   | 1970694   | 1686570   | 1252555   | 1497676   | 1520833   |
| fpHILIC | Negative | 181.0597 | 1.76   | unknown | 20142916  | 9158250   | 111331978 | 15206214  | 8424294   | 16350900  | 8197744   | 8503857   | 8081664   | 14714568  | 10239509  | 11163426  | 9861841   | 12447211  | 9329286   | 8903216   | 10849468  | 13351408  | 9487965   |
| EIC     | Negative | 318.1182 | 0.92   | unknown | 149921    | 98911     | 177631    | 167331    | 77468     | 68933     | 98878     | 136102    | 72573     | 141008    | 113630    | 101775    | 108283    | 45137     | 82436     | 98791     | 85524     | 156226    | 52396     |
| EIC     | Negative | 540.3312 | 4.46   | unknown | 9302815   | 8260009   | 7717826   | 7551285   | 6822036   | 6922773   | 6609199   | 6798309   | 7528062   | 7648048   | 7520437   | 7645928   | 7793271   | 7305010   | 7512231   | 8923693   | 6036177   | 6879503   | 6780900   |
| fpHILIC | Negative | 194.9274 | 4.55   | unknown | 84022248  | 70252064  | 72543080  | 78856672  | 57682008  | 74823952  | 62112668  | 65838444  | 70490512  | 85447184  | 63962320  | 70830632  | 77033424  | 65640920  | 75902560  | 79096824  | 59235336  | 63976876  | 68510096  |
| fpHILIC | Positive | 293.1452 | 3.47   | unknown | 1121845   | 666057    | 808635    | 794836    | 737260    | 741760    | 726134    | 770673    | 748496    | 876102    | 836831    | 679803    | 797376    | 690223    | 979590    | 689498    | 761355    | 928716    | 544762    |
| EIC     | Negative | 378.8184 | 0.65   | unknown | 148939    | 54733     | 77503     | 145503    | 34223     | 113288    | 56799     | 16532     | 43710     | 94669     | 60869     | 72361     | 51597     | 20339     | 43649     | 71828     | 34258     | 50855     | 76774     |
| EIC     | Negative | 247.1703 | 3.84   | unknown | 203046    | 244327    | 137976    | 147136    | 195360    | 176479    | 186579    | 173278    | 161756    | 140166    | 205060    | 180911    | 203518    | 148753    | 178174    | 153802    | 179894    | 193081    | 231963    |
| EIC     | Negative | 372.8115 | 0.52   | unknown | 1043796   | 837733    | 1348957   | 1244933   | 806377    | 899152    | 790924    | 628677    | 1074639   | 1132619   | 825363    | 830028    | 853793    | 198146    | 796599    | 998840    | 747128    | 974899    | 887556    |
| fpHILIC | Negative | 196.9233 | 4.55   | unknown | 7445866   | 6162219   | 6332557   | 6915964   | 5076767   | 6391476   | 5364101   | 5776647   | 6208817   | 7417636   | 5297311   | 6197246   | 6585361   | 5975611   | 6599829   | 6981664   | 5039400   | 5614366   | 5994871   |
| EIC     | Negative | 345.2104 | 6.31   | unknown | 4179148   | 13122685  | 15331457  | 11138244  | 5199947   | 12352622  | 6143649   | 11101238  | 9920617   | 11342802  | 20514748  | 15849263  | 5495648   | 8860131   | 15412079  | 18090920  | 5772243   | 6224978   | 7525863   |
| fpHILIC | Negative | 97.9595  | 4.56   | unknown | 624266    | 561410    | 562030    | 609397    | 475067    | 630525    | 525965    | 503185    | 528714    | 702998    | 530258    | 502422    | 568155    | 462340    | 576184    | 647344    | 496989    | 526267    | 552295    |
| EIC     | Negative | 257.1760 | 2.83   | unknown | 287350    | 202088    | 290814    | 269819    | 219759    | 269670    | 232082    | 275336    | 156871    | 315966    | 182746    | 317346    | 299329    | 137524    | 183533    | 216557    | 218096    | 396364    | 196261    |
| fpHILIC | Positive | 806.5683 | 0.43   | unknown | 42863012  | 76773720  | 41393884  | 51206274  | 50755044  | 50160710  | 47898896  | 39013060  | 74052000  | 43375764  | 65420536  | 58861048  | 63355756  | 60544148  | 50604868  | 69423384  | 58319928  | 35497288  | 11127800  |
| EIC     | Negative | 450.2632 | 4.06   | unknown | 871974    | 1322233   | 1179081   | 751477    | 1041766   | 1028592   | 867526    | 724273    | 728749    | 128789    | 1038222   | 932719    | 726943    | 939767    | 1268886   | 1048995   | 893766    | 957144    | 1397267   |
| fpHILIC | Negative | 166.0132 | 2.98   | unknown | 734693    | 409194    | 663101    | 637145    | 435547    | 472526    | 359980    | 389385    | 368888    | 571303    | 449372    | 464605    | 498822    | 256147    | 396093    | 358918    | 485981    | 498887    | 388613    |
| fpHILIC | Negative | 304.1302 | 0.93   | unknown | 514136    | 402953    | 317585    | 381820    | 317585    | 318204    | 423233    | 358937    | 404239    | 364762    | 326800    | 351265    | 341626    | 410703    | 334238    | 328049    | 421888    | 330858    |           |
| fpHILIC | Negative | 183.5558 | 0.44   | unknown | 18943132  | 18255506  | 17402424  | 13360260  | 15265789  | 13307121  | 11234166  | 12746728  | 18403352  | 14599579  | 16859006  | 14531310  | 14291114  | 19891282  | 16544258  | 13481533  | 13708244  | 11799348  | 19034628  |
| EIC     | Negative | 556.3009 | 4.36   | unknown | 839384    | 797631    | 883302    | 877043    | 802018    | 696816    | 751624    | 817043    | 685874    | 787899    | 854021    | 861308    | 815897    | 796944    | 830273    | 632808    | 712722    | 863696    | 785448    |
| fpHILIC | Positive | 279.1000 | 2.97   | unknown | 5256625   | 2679299   | 4529694   | 2588100   | 2189403   | 2670938   | 2782004   | 2478035   | 2644615   | 3687842   | 4295438   | 2550224   | 3495867   | 5053840   | 4791288   | 628979    | 3783678   | 1735814   | 2478180   |
| EIC     | Negative | 466.2209 | 0.88   | unknown | 169150    | 231307    | 117981    | 84703     | 108420    | 127296    | 133536    | 118892    | 116018    | 116018    | 194649    | 175834    | 151444    | 155469    | 121241    | 146755    | 103124    | 116359    | 183117    |
| EIC     | Negative | 478.8991 | 0.52   | unknown | 1129949   | 1283362   | 1215254   | 1495708   | 862881    | 1022407   | 1070729   | 1302788   | 1255848   | 932865    | 1250181   | 1384976   | 1295866   | 117341    | 957446    | 1128606   | 1266119   | 1223141   | 1192291   |
| EIC     | Negative | 232.8893 | 0.52   | unknown | 969488    | 676527    | 1131882   | 1002526   | 785007    | 723775    | 652278    | 522004    | 829006    | 1139831   | 647411    | 627680    |           |           |           |           |           |           |           |

|         |          |          |      |         |         |         |         |         |         |         |         |         |         |         |         |         |         |         |         |         |          |         |         |
|---------|----------|----------|------|---------|---------|---------|---------|---------|---------|---------|---------|---------|---------|---------|---------|---------|---------|---------|---------|---------|----------|---------|---------|
| EIC     | Negative | 448.1698 | 0.71 | unknown | 682479  | 580772  | 798567  | 321002  | 463919  | 564141  | 586763  | 341325  | 484805  | 760895  | 619657  | 482297  | 486349  | 821789  | 507352  | 469851  | 404172   | 285909  | 920934  |
| EIC     | Negative | 436.6609 | 0.62 | unknown | 85113   | 65686   | 114849  | 85953   | 75666   | 66850   | 61881   | 46310   | 85908   | 131396  | 62251   | 59734   | 60983   | 44846   | 55694   | 72662   | 48514    | 67099   | 113209  |
| fpHILIC | Negative | 554.3087 | 0.60 | unknown | 2094129 | 2500717 | 1932844 | 1790738 | 1675369 | 1838551 | 2100386 | 1683861 | 1735862 | 1869012 | 1845295 | 2297722 | 2143183 | 1984091 | 2178790 | 1991790 | 19212780 | 1514767 | 1988602 |
| EIC     | Negative | 440.7698 | 0.65 | unknown | 95458   | 47057   | 55063   | 100901  | 22357   | 73374   | 42603   | 28299   | 29767   | 62515   | 52750   | 55068   | 40624   | 8590    | 31227   | 55451   | 27188    | 40854   | 53730   |
| EIC     | Negative | 371.1422 | 3.94 | unknown | 206499  | 167223  | 269775  | 149331  | 106301  | 261949  | 188455  | 158800  | 143272  | 121419  | 187437  | 258245  | 263639  | 223826  | 92282   | 226379  | 186437   | 268270  | 138920  |
| EIC     | Negative | 531.2732 | 5.75 | unknown | 2434145 | 3181633 | 1998810 | 2321195 | 3197289 | 1633180 | 3139883 | 2199014 | 1375588 | 1692457 | 2170244 | 2382078 | 2243130 | 2673895 | 2383815 | 1413349 | 3120663  | 3228443 | 2129700 |
| EIC     | Negative | 249.1126 | 3.07 | unknown | 14203   | 55169   | 32287   | 112335  | 62324   | 67366   | 17560   | 15860   | 68081   | 74707   | 45600   | 89731   | 44059   | 41687   | 26152   | 58068   | 73788    | 68814   | 19895   |
| EIC     | Negative | 263.1654 | 3.31 | unknown | 260410  | 242686  | 270097  | 301924  | 199429  | 185847  | 206478  | 214166  | 155224  | 254794  | 229093  | 212765  | 238114  | 164328  | 172313  | 198836  | 184632   | 219095  | 247716  |
| fpHILIC | Negative | 196.9316 | 4.56 | unknown | 1355634 | 1085519 | 1161172 | 1197046 | 936210  | 1159413 | 911691  | 1068496 | 1132181 | 1411472 | 1099599 | 1133078 | 1265411 | 1023444 | 1215731 | 1214119 | 1006522  | 985650  | 1197174 |
| fpHILIC | Positive | 343.1641 | 3.39 | unknown | 1695127 | 1636039 | 1079391 | 1030365 | 1307720 | 1418310 | 1143639 | 1172056 | 1406606 | 936253  | 1068717 | 1439742 | 1431713 | 1792042 | 1525428 | 1464750 | 1233801  | 1698780 | 942058  |
| EIC     | Negative | 250.1448 | 2.24 | unknown | 1136666 | 611596  | 549780  | 1535966 | 669980  | 1184918 | 695745  | 578164  | 532395  | 852011  | 795618  | 910246  | 682311  | 294761  | 1079109 | 939959  | 877592   | 603492  | 399285  |
| EIC     | Negative | 619.0205 | 0.48 | unknown | 242947  | 306383  | 284062  | 314669  | 253807  | 272163  | 261669  | 307143  | 322894  | 308944  | 288123  | 329413  | 289212  | 49838   | 239216  | 315104  | 352822   | 329158  | 273702  |
| EIC     | Negative | 318.7466 | 0.61 | unknown | 104993  | 70031   | 112950  | 104199  | 87270   | 81184   | 67206   | 50937   | 93639   | 135934  | 68071   | 59783   | 80978   | 74179   | 64173   | 71610   | 72458    | 82062   | 114770  |
| EIC     | Negative | 446.1721 | 0.71 | unknown | 1954194 | 1662116 | 2275655 | 946577  | 1306276 | 1650947 | 1673510 | 934702  | 1402974 | 2164649 | 1768025 | 1403701 | 1402885 | 2344531 | 1463771 | 1315878 | 1141250  | 885248  | 2620462 |
| EIC     | Negative | 447.1756 | 0.71 | unknown | 391455  | 321807  | 442072  | 178771  | 249724  | 320977  | 327429  | 181300  | 268796  | 422834  | 333015  | 276025  | 267646  | 450196  | 288362  | 252463  | 218475   | 171926  | 506330  |
| EIC     | Negative | 519.1675 | 1.87 | unknown | 43329   | 365089  | 0       | 0       | 65758   | 144810  | 149437  | 207587  | 0       | 228211  | 86027   | 221432  | 172730  | 166995  | 179976  | 112726  | 0        | 145918  |         |
| EIC     | Negative | 619.3472 | 2.85 | unknown | 332807  | 964480  | 1075252 | 686010  | 366471  | 720018  | 475704  | 605402  | 266979  | 972764  | 881040  | 605987  | 277314  | 91215   | 496529  | 519803  | 573692   | 565840  | 441919  |
| fpHILIC | Positive | 167.0483 | 3.24 | unknown | 6010418 | 5450413 | 4464935 | 4633675 | 4083561 | 5024510 | 3538748 | 3140111 | 3594710 | 3385319 | 3932692 | 4299980 | 3547298 | 4042542 | 4680705 | 4333110 | 4552029  | 4060657 |         |
| EIC     | Negative | 366.2728 | 6.01 | unknown | 201904  | 140223  | 222689  | 161158  | 134717  | 83202   | 141434  | 168909  | 123336  | 201178  | 137767  | 117283  | 104859  | 131740  | 161039  | 178801  | 103057   | 134743  | 118041  |
| EIC     | Negative | 505.2078 | 1.15 | unknown | 164496  | 131033  | 121032  | 67381   | 80853   | 117984  | 164198  | 45878   | 121466  | 122181  | 88829   | 146292  | 99021   | 75998   | 96198   | 142069  | 172629   | 80104   | 65459   |
| EIC     | Negative | 274.1848 | 2.48 | unknown | 1163381 | 200957  | 649458  | 1538850 | 280092  | 230945  | 351391  | 1419665 | 500284  | 1069554 | 221411  | 358888  | 286019  | 74642   | 189842  | 352488  | 261242   | 1680835 | 198680  |
| fpHILIC | Negative | 147.0663 | 3.47 | unknown | 1056363 | 673873  | 868267  | 764074  | 670313  | 674118  | 606061  | 582503  | 567338  | 839896  | 674037  | 699661  | 651975  | 533703  | 832364  | 540428  | 588325   | 869795  | 430025  |
| fpHILIC | Negative | 291.0385 | 2.69 | unknown | 1115317 | 247244  | 132522  | 131411  | 187872  | 387486  | 0       | 173095  | 343315  | 73143   | 82831   | 203659  | 182198  | 161465  | 82684   | 306350  | 249605   | 344758  | 182810  |
| EIC     | Negative | 635.0444 | 0.48 | unknown | 1359243 | 1445440 | 1644945 | 1622353 | 1134272 | 1305670 | 1327648 | 1469255 | 1554348 | 1477313 | 1430074 | 1513552 | 84216   | 1379160 | 1538299 | 1345493 | 1551355  | 1296673 |         |
| EIC     | Negative | 260.7875 | 0.61 | unknown | 172515  | 133390  | 200817  | 176501  | 180589  | 139905  | 142163  | 103124  | 175966  | 259139  | 127049  | 113381  | 137179  | 204453  | 136467  | 134869  | 134016   | 154696  | 323683  |
| fpHILIC | Negative | 309.1083 | 3.54 | unknown | 726318  | 363274  | 426283  | 397090  | 279590  | 148719  | 245975  | 331874  | 234201  | 439999  | 268747  | 234200  | 240293  | 312463  | 318232  | 244025  | 317105   | 486731  | 248864  |
| EIC     | Negative | 325.2384 | 5.94 | unknown | 570127  | 337041  | 1441177 | 601833  | 344692  | 0       | 432455  | 908474  | 0       | 645908  | 432223  | 530011  | 354464  | 338002  | 273968  | 0       | 322572   | 738870  | 466956  |
| EIC     | Negative | 242.1841 | 3.53 | unknown | 238615  | 162683  | 324371  | 305066  | 151322  | 179553  | 179518  | 211522  | 152806  | 245448  | 190701  | 282224  | 266488  | 176612  | 149495  | 193496  | 179371   | 278364  | 134356  |
| fpHILIC | Negative | 357.0292 | 3.01 | unknown | 559048  | 493372  | 549956  | 613589  | 399990  | 414505  | 403609  | 434307  | 445469  | 667474  | 427004  | 384097  | 457831  | 407593  | 391331  | 404628  | 474040   | 533885  | 439852  |
| EIC     | Negative | 299.2592 | 4.34 | unknown | 0       | 5600672 | 5056496 | 4970579 | 5236493 | 0       | 0       | 0       | 0       | 0       | 0       | 0       | 0       | 0       | 0       | 0       | 0        | 5600907 | 0       |
| EIC     | Negative | 475.2665 | 3.99 | unknown | 1320997 | 1592166 | 1750083 | 906644  | 1078938 | 1715215 | 965830  | 1226881 | 646415  | 759142  | 1311871 | 862809  | 731300  | 2633706 | 1307135 | 400878  | 1094949  | 1284861 | 1938276 |
| EIC     | Negative | 476.6699 | 3.99 | unknown | 235219  | 313351  | 362057  | 192494  | 226940  | 341540  | 205544  | 233122  | 130501  | 170565  | 276649  | 186372  | 177819  | 497074  | 253373  | 85089   | 243881   | 253890  | 380871  |
| EIC     | Negative | 570.3424 | 2.89 | unknown | 182052  | 228067  | 165117  | 130506  | 140070  | 107012  | 0       | 136229  | 130566  | 1036229 | 126993  | 156170  | 137270  | 343036  | 163953  | 183464  | 138031   | 0       | 241379  |
| EIC     | Negative | 570.3417 | 3.94 | unknown | 400416  | 330554  | 337203  | 292325  | 311502  | 401531  | 345189  | 340789  | 231287  | 389452  | 450777  | 393939  | 280770  | 425351  | 433335  | 311148  | 271325   | 304255  | 426894  |
| fpHILIC | Positive | 173.0916 | 2.59 | unknown | 1513751 | 1374785 | 1018829 | 901548  | 943802  | 1705187 | 1126775 | 360819  | 1038198 | 1156341 | 1345487 | 823914  | 1177730 | 1683896 | 1215663 | 624314  | 1181364  | 855168  |         |
| fpHILIC | Negative | 203.0678 | 3.86 | unknown | 723789  | 274992  | 317226  | 562244  | 242231  | 447358  | 230733  | 260960  | 250200  | 320800  | 278083  | 278142  | 287513  | 192162  | 256415  | 383469  | 306508   | 331519  | 256734  |
| EIC     | Negative | 135.1620 | 2.01 | unknown | 979369  | 816613  | 860948  | 406387  | 603987  | 969807  | 1398400 | 0       | 866899  | 1264457 | 1135640 | 489649  | 541617  | 1062471 | 702870  | 0       | 0        | 0       | 0       |
| fpHILIC | Negative | 358.1694 | 0.93 | unknown | 890381  | 328198  | 640306  | 924704  | 377795  | 353237  | 389052  | 822870  | 745073  | 537768  | 268241  | 435592  | 416647  | 400375  | 436414  | 615559  | 559446   | 908808  | 362468  |
| EIC     | Negative | 380.6992 | 0.62 | unknown | 99898   | 82809   | 141209  | 96883   | 95421   | 74400   | 81782   | 52559   | 71463   | 52559   | 73493   | 66602   | 79443   | 90716   | 71643   | 75299   | 68663    | 84184   | 135433  |
| fpHILIC | Negative | 571.3445 | 0.62 | unknown | 878809  | 944589  | 593678  | 661869  | 560403  | 930218  | 738109  | 610465  | 1024185 | 700095  | 832649  | 769137  | 893144  | 787851  | 1005429 | 918603  | 782779   | 571128  | 807590  |
| fpHILIC | Negative | 125.0066 | 3.22 | unknown | 1605081 | 1134842 | 961849  | 1334921 | 1016021 | 1290270 | 1040987 | 1013556 | 1042547 | 1073775 | 1089425 | 1230662 | 1133656 | 1042547 | 1100754 | 1475015 | 1148033  | 1185318 | 1075672 |
| fpHILIC | Positive | 328.1602 | 2.78 | unknown | 6021232 | 5481088 | 6308594 | 4498547 | 5143956 | 5483098 | 4425707 | 5081931 | 4469692 | 5206993 | 5978399 | 5599274 | 5182233 | 6098532 | 5093180 | 5012627 | 4965361  | 5597993 | 5769622 |
| fpHILIC | Positive | 792.5925 | 0.43 | unknown | 677792  | 764690  | 1032787 | 860168  | 850039  | 803136  | 611989  | 828069  | 630324  | 760748  | 831707  | 757103  | 799603  | 680326  | 645412  | 1028152 | 840756   | 817902  | 759210  |
| EIC     | Negative | 301.2385 | 3.28 | unknown | 148379  | 81960   | 320489  | 139747  | 218636  | 147183  | 75970   | 175055  | 63287   | 152633  | 118386  | 102268  | 113326  | 108795  | 91731   | 191368  | 130133   | 256723  | 60578   |
| EIC     | Negative | 345.1714 | 1.53 | unknown | 289583  | 241424  | 0       | 289492  | 146262  | 184795  | 121089  | 0       | 69177   | 0       | 139055  | 213606  | 119207  | 163416  | 119813  | 161390  | 72324    | 0       | 118669  |
| EIC     | Negative | 299.2592 | 4.40 | unknown | 0       | 7626982 | 8054837 | 7985151 | 7889285 | 0       | 0       | 0       | 0       | 0       | 0       | 0       | 0       | 0       | 0       | 0       | 0        | 8475975 | 0       |
| fpHILIC | Negative | 409.2351 | 0.61 | unknown | 3786327 | 5375044 | 3097774 | 4150198 | 3757244 | 4001725 | 3629729 | 3096207 | 4944257 | 3719511 | 5449861 | 4484941 | 4777755 | 4623173 | 4771780 | 4307461 | 3994326  | 3285252 | 4526963 |
| fpHILIC | Positive | 344.1325 | 2.99 | unknown | 458060  | 415715  | 672440  | 402656  | 274597  | 367545  | 258971  | 193298  | 155164  | 304946  | 259260  | 251205  | 279970  | 201332  | 276759  | 216942  | 279154   | 358049  | 212422  |
| EIC     | Negative | 424.2475 | 3.95 | unknown | 592535  | 656321  | 815449  | 522289  | 460278  | 753807  | 514279  | 591676  | 345617  | 478558  | 566057  | 608025  | 368804  | 1222221 | 516970  | 323783  | 539273   | 675927  | 820494  |
| EIC     |          |          |      |         |         |         |         |         |         |         |         |         |         |         |         |         |         |         |         |         |          |         |         |

|         |          |          |      |         |          |          |          |          |          |           |          |          |          |          |          |          |          |           |          |          |          |          |          |        |
|---------|----------|----------|------|---------|----------|----------|----------|----------|----------|-----------|----------|----------|----------|----------|----------|----------|----------|-----------|----------|----------|----------|----------|----------|--------|
| EIC     | Negative | 410.1712 | 3.94 | unknown | 466382   | 386923   | 728564   | 343519   | 212671   | 677039    | 423414   | 323370   | 277248   | 249680   | 460279   | 626771   | 688572   | 513047    | 189936   | 463675   | 476584   | 633973   | 306904   |        |
| EIC     | Negative | 578.3460 | 3.68 | unknown | 0        | 5433857  | 3448319  | 127807   | 118890   | 111653    | 222527   | 5125620  | 0        | 91333    | 103201   | 4199488  | 4578946  | 3765600   | 0        | 75739    | 114267   | 576784   | 77960    |        |
| EIC     | Negative | 286.9446 | 0.55 | unknown | 872706   | 160036   | 269481   | 459512   | 142388   | 559090    | 202412   | 155034   | 0        | 459750   | 210041   | 209405   | 559090   | 153290    | 138381   | 230917   | 314143   | 72506    | 182523   | 423600 |
| EIC     | Negative | 282.1798 | 3.03 | unknown | 185771   | 64003    | 149960   | 165722   | 61431    | 73849     | 71302    | 109301   | 56213    | 222622   | 61466    | 100575   | 72907    | 66421     | 70334    | 69066    | 67312    | 146956   | 49128    |        |
| EIC     | Negative | 257.1760 | 2.36 | unknown | 357316   | 166432   | 339556   | 338619   | 194389   | 239278    | 244942   | 283551   | 219289   | 292854   | 221167   | 293002   | 283195   | 183115    | 228235   | 304699   | 206206   | 366490   | 173377   |        |
| fpHILIC | Positive | 128.0176 | 3.23 | unknown | 4752617  | 4177390  | 3220444  | 3555959  | 2911449  | 4033249   | 2614989  | 2376250  | 3473573  | 2608844  | 2491471  | 3041849  | 3238444  | 2794687   | 3127300  | 3924745  | 3209017  | 3558128  | 2869557  |        |
| EIC     | Negative | 293.1741 | 5.18 | unknown | 208256   | 144739   | 169835   | 505321   | 207411   | 161801    | 180305   | 205462   | 256739   | 235848   | 181166   | 213376   | 348422   | 62729     | 133171   | 403003   | 199283   | 257065   | 103289   |        |
| fpHILIC | Negative | 161.0563 | 2.94 | unknown | 744071   | 286936   | 190410   | 275421   | 192751   | 542840    | 178104   | 197605   | 266207   | 256121   | 238244   | 348686   | 244002   | 214869    | 200874   | 322558   | 349947   | 286983   | 326777   |        |
| EIC     | Negative | 476.2785 | 4.47 | unknown | 76972350 | 91444216 | 87094888 | 66126309 | 69381394 | 102600825 | 66585162 | 74772189 | 48274252 | 62754981 | 81783098 | 65642011 | 53945263 | 116117014 | 96436954 | 47370388 | 74207780 | 78288018 | 95809161 |        |
| fpHILIC | Negative | 245.1137 | 3.03 | unknown | 531653   | 342121   | 334954   | 255216   | 287065   | 566659    | 287564   | 244432   | 255993   | 294524   | 369429   | 375772   | 309313   | 348203    | 464464   | 333747   | 336850   | 242287   | 403067   |        |
| EIC     | Negative | 255.0929 | 0.75 | unknown | 144227   | 68972    | 53498    | 179352   | 63657    | 206370    | 175959   | 0        | 46418    | 81186    | 116101   | 155943   | 121413   | 164663    | 97000    | 146990   | 93954    | 73721    | 122423   |        |
| EIC     | Negative | 620.5429 | 0.64 | unknown | 101920   | 52592    | 156641   | 113362   | 51907    | 69283     | 57349    | 44671    | 85191    | 176203   | 53575    | 37055    | 65124    | 0         | 35640    | 71487    | 31075    | 80573    | 115729   |        |
| EIC     | Negative | 477.2815 | 4.47 | unknown | 20271228 | 23487179 | 22825407 | 17297280 | 18293321 | 26819409  | 17546386 | 19517860 | 12441627 | 16799080 | 21346072 | 17196054 | 14283766 | 30466156  | 25081037 | 12405469 | 19353272 | 20607557 | 25195161 |        |
| fpHILIC | Positive | 318.1296 | 3.39 | unknown | 298936   | 270352   | 454440   | 408731   | 244756   | 239499    | 377091   | 279736   | 156463   | 558553   | 389226   | 270313   | 374533   | 145180    | 337957   | 136757   | 299598   | 315149   | 318153   |        |
| fpHILIC | Positive | 177.1232 | 3.39 | unknown | 794317   | 386772   | 758269   | 667439   | 387030   | 519317    | 464018   | 488393   | 365496   | 517824   | 416161   | 561729   | 396053   | 439120    | 445134   | 484069   | 405302   | 628588   | 450910   |        |
| EIC     | Negative | 478.2844 | 4.47 | unknown | 3592097  | 4755542  | 4120563  | 3171947  | 3306923  | 4970058   | 3173660  | 3509472  | 2382874  | 2949177  | 3786161  | 3207870  | 2523711  | 5410651   | 4478987  | 2295541  | 3752781  | 3821669  | 4474125  |        |
| fpHILIC | Negative | 595.3438 | 0.62 | unknown | 732414   | 709430   | 976122   | 566452   | 634857   | 816268    | 608554   | 724225   | 442398   | 612732   | 796123   | 732683   | 589767   | 840723    | 603818   | 625217   | 683566   | 676867   | 916145   |        |
| fpHILIC | Positive | 149.0595 | 2.06 | unknown | 2094140  | 1165616  | 1665184  | 1188837  | 1113898  | 1173865   | 1088996  | 1112606  | 1192788  | 1341338  | 1190345  | 1391463  | 1001016  | 1670561   | 1624907  | 1136862  | 858393   | 1398501  | 1061619  |        |
| EIC     | Negative | 251.0924 | 2.53 | unknown | 194894   | 166818   | 140286   | 216400   | 162380   | 153718    | 165435   | 148609   | 141124   | 194216   | 152020   | 139803   | 162634   | 152758    | 169862   | 146172   | 161942   | 209588   | 150628   |        |
| EIC     | Negative | 322.2440 | 5.22 | unknown | 1401733  | 1264063  | 1285769  | 1384223  | 1259788  | 1154342   | 1173245  | 1327292  | 1325275  | 1299268  | 1239134  | 1174118  | 1190423  | 1232866   | 1399177  | 1277424  | 1337158  | 1322728  |          |        |
| EIC     | Negative | 490.7658 | 0.52 | unknown | 813239   | 495034   | 952611   | 843264   | 508288   | 580772    | 458931   | 463958   | 681897   | 835459   | 466604   | 426793   | 515099   | 57045     | 432216   | 615583   | 535755   | 599741   | 709127   |        |
| EIC     | Negative | 464.1822 | 0.71 | unknown | 313126   | 269255   | 376280   | 151428   | 212089   | 263020    | 271184   | 151667   | 279086   | 227857   | 263020   | 274740   | 379316   | 239495    | 221858   | 194112   | 144698   | 425310   |          |        |
| EIC     | Negative | 320.7431 | 0.62 | unknown | 178095   | 126620   | 212647   | 176623   | 174225   | 131428    | 134837   | 92322    | 184898   | 257831   | 130653   | 106253   | 137151   | 141411    | 123978   | 140389   | 125593   | 152306   | 238741   |        |
| EIC     | Negative | 373.2022 | 3.94 | unknown | 231244   | 196332   | 466340   | 226534   | 116908   | 388742    | 202220   | 184184   | 146948   | 136532   | 205714   | 361187   | 398229   | 278250    | 90439    | 249825   | 261734   | 323846   | 174956   |        |
| EIC     | Negative | 330.2523 | 6.50 | unknown | 13907329 | 8399113  | 19176256 | 27235558 | 570727   | 17055422  | 12453039 | 986951   | 11590786 | 14607104 | 12202137 | 871720   | 10133475 | 703937    | 836327   | 10055406 | 12548342 | 22310220 | 756638   |        |
| fpHILIC | Negative | 336.0522 | 2.99 | unknown | 1629343  | 1064299  | 1343894  | 1363504  | 865533   | 1070425   | 879471   | 917993   | 1006358  | 1437724  | 930845   | 880616   | 932479   | 920235    | 924450   | 842515   | 1026823  | 1311299  | 884605   |        |
| EIC     | Negative | 344.2176 | 3.63 | unknown | 338356   | 84867    | 470008   | 70781    | 38274    | 112352    | 59811    | 220840   | 33135    | 211974   | 54219    | 134935   | 42457    | 112144    | 60710    | 19323    | 87211    | 170076   | 169256   |        |
| fpHILIC | Positive | 127.0211 | 3.23 | unknown | 647376   | 558716   | 445517   | 484507   | 375084   | 492557    | 377959   | 356869   | 431391   | 314164   | 339519   | 445467   | 434594   | 433689    | 426577   | 565731   | 392524   | 461772   | 372405   |        |
| EIC     | Negative | 550.7204 | 0.52 | unknown | 545766   | 310873   | 729242   | 788081   | 401736   | 408259    | 472247   | 283961   | 519282   | 638030   | 426963   | 446834   | 600749   | 0         | 393259   | 407720   | 410006   | 531161   | 471940   |        |
| fpHILIC | Negative | 126.0112 | 3.23 | unknown | 1702345  | 1174844  | 1182775  | 1362503  | 1011988  | 1319166   | 1044969  | 1054243  | 1195399  | 1090432  | 1120345  | 1131258  | 1115599  | 938543    | 1211034  | 1228400  | 1156130  | 1461052  | 1086246  |        |
| EIC     | Negative | 438.6577 | 0.62 | unknown | 85924    | 77094    | 134361   | 97824    | 85677    | 72025     | 72409    | 53591    | 94428    | 154665   | 66122    | 59247    | 74796    | 52723     | 64761    | 73576    | 62803    | 81278    | 130614   |        |
| EIC     | Negative | 582.6385 | 0.52 | unknown | 534548   | 226970   | 537682   | 632954   | 316309   | 448205    | 275389   | 95714    | 480782   | 701173   | 217150   | 220020   | 267441   | 0         | 163730   | 430722   | 239193   | 388138   | 544661   |        |
| EIC     | Negative | 523.3650 | 3.15 | unknown | 152706   | 114656   | 126288   | 108204   | 104663   | 100436    | 101708   | 151410   | 180782   | 610158   | 118689   | 105317   | 84372    | 73518     | 112966   | 145685   | 106829   | 154470   | 101755   |        |
| EIC     | Negative | 253.1446 | 2.68 | unknown | 3976801  | 6490650  | 3686580  | 4945227  | 4734985  | 2265114   | 4555817  | 2660394  | 7727679  | 3409150  | 3739124  | 3811267  | 5546613  | 5422439   | 5496144  | 7799518  | 3563939  | 3399774  | 3334005  |        |
| fpHILIC | Positive | 210.0951 | 2.38 | unknown | 602246   | 335620   | 228020   | 288390   | 303938   | 462154    | 359175   | 149786   | 212433   | 300842   | 494942   | 478515   | 464598   | 370497    | 401706   | 358821   | 281908   | 241075   | 342568   |        |
| EIC     | Negative | 365.6923 | 5.92 | unknown | 899656   | 687093   | 1153004  | 842404   | 637184   | 483319    | 730255   | 916409   | 642376   | 1062548  | 633779   | 590226   | 547252   | 613782    | 914136   | 858946   | 518369   | 817425   | 620597   |        |
| EIC     | Negative | 346.2138 | 6.31 | unknown | 931035   | 2786047  | 3112032  | 2282156  | 1063291  | 2500540   | 1179220  | 2122152  | 2032920  | 2422912  | 4167276  | 3192900  | 1195227  | 1811827   | 3176297  | 1683598  | 2028878  | 1300926  | 1643309  |        |
| fpHILIC | Positive | 248.1116 | 3.18 | unknown | 681801   | 248154   | 221069   | 434691   | 279201   | 403315    | 264635   | 207446   | 450260   | 249609   | 332968   | 320324   | 347496   | 373559    | 249301   | 542875   | 301060   | 358503   | 304320   |        |
| fpHILIC | Negative | 857.5180 | 0.38 | unknown | 1939142  | 1387752  | 1212475  | 2275543  | 1265861  | 956944    | 768889   | 1432116  | 2119183  | 1432116  | 1557055  | 1441056  | 833767   | 1542719   | 1228966  | 1420457  | 1557109  | 1294419  | 1066619  |        |
| EIC     | Negative | 234.8865 | 0.59 | unknown | 263451   | 211816   | 329227   | 257632   | 240061   | 207890    | 212432   | 171427   | 265390   | 319323   | 216898   | 203766   | 227017   | 227891    | 202803   | 237490   | 184084   | 232944   | 343880   |        |
| EIC     | Negative | 253.1810 | 3.45 | unknown | 143638   | 88064    | 182500   | 134926   | 113094   | 93038     | 113094   | 97004    | 132955   | 77954    | 143105   | 84192    | 68263    | 98574     | 103022   | 127743   | 143102   | 177943   | 348370   |        |
| fpHILIC | Positive | 875.1299 | 3.32 | unknown | 1113313  | 788963   | 1084933  | 1138570  | 1016413  | 954685    | 609338   | 786197   | 890603   | 907160   | 664475   | 977487   | 878841   | 986540    | 1214430  | 1007692  | 564938   | 783053   | 1094718  |        |
| EIC     | Negative | 511.3641 | 3.13 | unknown | 143605   | 53362    | 110479   | 59991    | 105696   | 93281     | 93281    | 93281    | 93281    | 907645   | 57121    | 36303    | 33996    | 46986     | 65014    | 50254    | 55839    | 142325   | 51839    |        |
| fpHILIC | Positive | 244.0790 | 3.16 | unknown | 3732045  | 4534697  | 4858377  | 5062489  | 4428119  | 4194749   | 0        | 4607154  | 4002664  | 4283765  | 4215127  | 4181502  | 4361154  | 3479620   | 3817696  | 3820484  | 3748540  | 4062444  | 3443292  |        |
| EIC     | Negative | 492.7622 | 0.52 | unknown | 587302   | 359600   | 755214   | 635033   | 432167   | 452306    | 362978   | 67842    | 385229   | 381861   | 402824   | 73929    | 73929    | 383691    | 516164   | 426018   | 483196   | 589379   |          |        |
| EIC     | Negative | 241.1808 | 3.52 | unknown | 1604395  | 1006799  | 2069910  | 2004960  | 968841   | 1157117   | 1138297  | 1335263  | 1004875  | 1503401  | 1222903  | 1744613  | 1655258  | 1129778   | 996079   | 1232532  | 1201256  | 1820666  | 896488   |        |
| EIC     | Negative | 366.3461 | 6.85 | unknown | 51441    | 86231    | 69466    | 127773   | 57566    | 90832     | 76001    | 79796    | 83787    | 122756   | 118231   | 118900   | 70142    | 189706    | 77083    | 92063    | 821235   | 140279   | 68115    |        |
| fpHILIC | Positive | 923.5700 | 3.18 | unknown | 845977   | 598610   | 908108   | 951370   | 700514   | 772005    | 616989   | 774587   | 558449   | 8117730  | 729525   | 634821   | 772500   | 1201696   | 833073   | 7528     |          |          |          |        |

|         |          |          |      |         |          |          |          |          |          |         |         |         |         |         |         |         |         |         |         |         |         |         |         |
|---------|----------|----------|------|---------|----------|----------|----------|----------|----------|---------|---------|---------|---------|---------|---------|---------|---------|---------|---------|---------|---------|---------|---------|
| fpHILIC | Positive | 508.3393 | 0.60 | unknown | 1131688  | 1233239  | 1470111  | 984678   | 1283024  | 1406390 | 1153126 | 1107553 | 825301  | 1057764 | 1346359 | 1261745 | 1140753 | 0       | 1216605 | 1161521 | 1567949 | 1163705 | 1276408 |
| fpHILIC | Positive | 194.0441 | 2.98 | unknown | 1551524  | 1076680  | 1196618  | 724981   | 762322   | 681816  | 721683  | 1135852 | 697666  | 963382  | 554828  | 590551  | 656867  | 986281  | 1196841 | 673785  | 709419  | 9991010 | 843434  |
| fpHILIC | Positive | 417.1870 | 2.61 | unknown | 1665075  | 1958495  | 1976842  | 1224989  | 1563671  | 1452235 | 1733148 | 1306282 | 1282881 | 1470281 | 2068540 | 2005741 | 1740996 | 2002832 | 2141436 | 1671614 | 1235884 | 1513174 | 1558908 |
| EIC     | Negative | 360.2468 | 3.28 | unknown | 136473   | 56335    | 100515   | 45091    | 47484    | 63714   | 67979   | 126868  | 61683   | 91716   | 68474   | 74444   | 48375   | 279764  | 77221   | 16812   | 92738   | 160344  | 59992   |
| EIC     | Negative | 307.1895 | 3.88 | unknown | 1533217  | 659115   | 2107263  | 1934334  | 845055   | 763040  | 1022824 | 1836228 | 975263  | 2853840 | 783237  | 1052485 | 875647  | 871922  | 767255  | 773972  | 953015  | 2824814 | 707575  |
| fpHILIC | Positive | 191.1205 | 3.25 | unknown | 1726001  | 419744   | 882705   | 1356888  | 613630   | 611987  | 396708  | 562432  | 661987  | 1541502 | 604305  | 615918  | 544840  | 349254  | 381302  | 763680  | 543670  | 1096522 | 369886  |
| EIC     | Negative | 272.7954 | 0.64 | unknown | 321443   | 158153   | 492607   | 354551   | 253885   | 287948  | 247482  | 180711  | 334449  | 181557  | 229990  | 196601  | 251269  | 181762  | 210061  | 278443  | 196167  | 286522  | 475484  |
| EIC     | Negative | 462.1661 | 0.68 | unknown | 92610    | 74830    | 56528    | 26844    | 41091    | 57174   | 63053   | 58211   | 630493  | 74437   | 61482   | 73358   | 63341   | 85964   | 59650   | 56404   | 50015   | 47687   | 100023  |
| fpHILIC | Negative | 322.9883 | 2.05 | unknown | 4476081  | 2774474  | 2620344  | 5978185  | 2083586  | 1181813 | 3348709 | 4601259 | 690898  | 4554316 | 3132922 | 2809122 | 5792207 | 7269472 | 5429274 | 1251722 | 6048429 | 3674417 | 2807193 |
| EIC     | Negative | 305.2483 | 5.87 | unknown | 128083   | 123136   | 144031   | 141347   | 99663    | 93957   | 103151  | 115904  | 84144   | 143983  | 108279  | 126105  | 113302  | 104340  | 119918  | 105489  | 119518  | 113805  | 92533   |
| EIC     | Negative | 332.7515 | 0.64 | unknown | 71674    | 41972    | 85490    | 64916    | 45212    | 55332   | 45377   | 36303   | 62982   | 111816  | 47696   | 38648   | 46605   | 25062   | 41799   | 47881   | 35769   | 61471   | 85184   |
| EIC     | Negative | 317.1757 | 3.22 | unknown | 138184   | 120302   | 151579   | 174165   | 180006   | 103466  | 123305  | 120660  | 148477  | 145388  | 119158  | 118507  | 148684  | 96192   | 97098   | 234540  | 122051  | 130304  | 86193   |
| EIC     | Negative | 327.2545 | 5.67 | unknown | 844582   | 628093   | 1170639  | 1019514  | 776782   | 690481  | 628732  | 1046239 | 580825  | 823607  | 650055  | 837564  | 718363  | 518520  | 484630  | 1114587 | 761517  | 1265656 | 506001  |
| EIC     | Negative | 272.7954 | 0.64 | unknown | 389492   | 209216   | 474230   | 346502   | 252894   | 275039  | 232210  | 174828  | 327184  | 581550  | 220614  | 197659  | 245455  | 211493  | 201127  | 273263  | 191465  | 285158  | 450188  |
| EIC     | Negative | 283.2282 | 5.95 | unknown | 706965   | 670522   | 725691   | 837027   | 457786   | 391875  | 425232  | 425214  | 341486  | 375927  | 377204  | 544988  | 552630  | 425859  | 544527  | 524911  | 391274  | 413194  | 392708  |
| EIC     | Negative | 294.8425 | 0.52 | unknown | 1341485  | 732983   | 1492741  | 1235306  | 9111070  | 932232  | 763916  | 1567108 | 793733  | 702556  | 1567108 | 793733  | 702556  | 1567108 | 793733  | 702556  | 1567108 | 793733  | 702556  |
| EIC     | Negative | 614.4147 | 2.73 | unknown | 162688   | 144060   | 268732   | 609212   | 340449   | 246376  | 229963  | 249723  | 158916  | 523083  | 498739  | 239105  | 216287  | 427508  | 105417  | 0       | 282297  | 634267  | 338854  |
| fpHILIC | Positive | 233.0777 | 2.69 | unknown | 859828   | 674829   | 504844   | 935729   | 588723   | 823985  | 476840  | 535720  | 523083  | 495685  | 576455  | 462693  | 467631  | 578825  | 516653  | 468265  | 503223  | 1134617 |         |
| EIC     | Negative | 427.1798 | 2.32 | unknown | 449812   | 1013390  | 323171   | 0        | 397418   | 32044   | 741740  | 0       | 763861  | 1421213 | 27335   | 0       | 1143129 | 32879   | 1061005 | 74569   | 10662   | 73456   | 929609  |
| EIC     | Negative | 414.1987 | 3.34 | unknown | 133586   | 631442   | 188254   | 0        | 196028   | 234389  | 77974   | 208452  | 700766  | 114153  | 503427  | 57195   | 51060   | 670353  | 51060   | 670353  | 0       | 143819  | 183419  |
| EIC     | Negative | 254.1762 | 3.02 | unknown | 312722   | 239000   | 226919   | 310999   | 247226   | 290103  | 286902  | 223539  | 127568  | 282757  | 271504  | 356147  | 291526  | 224657  | 306862  | 302628  | 305340  | 231110  | 211907  |
| EIC     | Negative | 359.2441 | 3.28 | unknown | 677109   | 252400   | 522588   | 270359   | 273991   | 323211  | 316915  | 611411  | 293506  | 412889  | 274345  | 322428  | 275997  | 1255444 | 341717  | 193601  | 474752  | 794136  | 274145  |
| EIC     | Negative | 271.1921 | 4.38 | unknown | 750801   | 391755   | 1159372  | 546791   | 352886   | 297457  | 388432  | 754908  | 196162  | 669027  | 393626  | 449691  | 324412  | 563336  | 397436  | 274947  | 327398  | 689591  | 522395  |
| EIC     | Negative | 477.3592 | 5.96 | unknown | 0        | 62689    | 47932    | 56920    | 60857    | 54460   | 54460   | 54460   | 45329   | 18856   | 89345   | 67236   | 55701   | 85738   | 38128   | 64927   | 58578   | 0       | 87834   |
| EIC     | Negative | 378.7017 | 0.62 | unknown | 97493    | 90248    | 139978   | 100419   | 98319    | 77853   | 79918   | 54443   | 103256  | 160380  | 75699   | 67008   | 79036   | 69185   | 75846   | 83886   | 68385   | 91217   | 141240  |
| EIC     | Negative | 243.1602 | 4.11 | unknown | 428350   | 394385   | 577786   | 326375   | 207490   | 257842  | 377443  | 281227  | 271545  | 250935  | 186555  | 433890  | 508440  | 280809  | 266419  | 340975  | 336537  | 374993  | 254543  |
| fpHILIC | Negative | 182.0319 | 3.17 | unknown | 541680   | 252475   | 424956   | 431020   | 202941   | 257942  | 287796  | 311644  | 320282  | 461176  | 294300  | 292326  | 284585  | 293228  | 289381  | 214030  | 400566  | 348562  | 284707  |
| fpHILIC | Positive | 201.0652 | 2.61 | unknown | 387933   | 505098   | 453868   | 259266   | 308910   | 503132  | 370456  | 212217  | 255675  | 281840  | 417190  | 350704  | 338295  | 422818  | 415515  | 503956  | 300535  | 281456  | 338189  |
| fpHILIC | Negative | 237.1497 | 0.39 | unknown | 2377974  | 1618267  | 2439035  | 3800571  | 1830260  | 1451239 | 2126771 | 1579232 | 2414953 | 2527282 | 1579603 | 1814834 | 2751832 | 1023368 | 1986851 | 250877  | 2332869 | 2688000 | 1024615 |
| EIC     | Negative | 298.1850 | 2.57 | unknown | 4658480  | 74545    | 2633011  | 5516733  | 96464    | 75624   | 81647   | 3388090 | 55934   | 3235961 | 77288   | 142354  | 127592  | 37673   | 96339   | 83391   | 89943   | 3770257 | 52557   |
| EIC     | Negative | 262.7844 | 0.61 | unknown | 289605   | 228364   | 346131   | 291966   | 294736   | 223733  | 232422  | 143804  | 288576  | 408125  | 205664  | 191584  | 233991  | 325543  | 225268  | 223717  | 218405  | 259640  | 392157  |
| fpHILIC | Negative | 78.9589  | 4.07 | unknown | 1268871  | 615852   | 450933   | 1630183  | 555934   | 1230729 | 556854  | 380320  | 306249  | 776830  | 691325  | 1162656 | 662691  | 361860  | 368491  | 1077277 | 724698  | 720204  | 488617  |
| EIC     | Negative | 385.2382 | 5.88 | unknown | 255050   | 140526   | 253158   | 262620   | 141647   | 107486  | 130366  | 156250  | 107486  | 163848  | 123389  | 143411  | 124477  | 169479  | 169479  | 152842  | 145125  | 292936  | 125267  |
| EIC     | Negative | 286.2108 | 4.43 | unknown | 205345   | 238668   | 219662   | 227831   | 110719   | 131745  | 192211  | 183015  | 174888  | 132972  | 197063  | 218163  | 204427  | 169861  | 225896  | 207630  | 148433  | 181893  | 125128  |
| EIC     | Negative | 561.3006 | 5.54 | unknown | 763827   | 635874   | 696738   | 615349   | 626921   | 653447  | 552794  | 660347  | 520575  | 600318  | 576145  | 596102  | 517458  | 762720  | 622169  | 707432  | 649800  | 712617  | 714137  |
| EIC     | Negative | 564.5813 | 0.63 | unknown | 130767   | 65764    | 187842   | 139575   | 65668    | 79050   | 64977   | 31398   | 107831  | 2121078 | 66128   | 60534   | 75871   | 0       | 58040   | 64991   | 17870   | 97646   | 151191  |
| fpHILIC | Positive | 223.1066 | 2.95 | unknown | 1479198  | 1140170  | 1165037  | 994511   | 1029050  | 1107191 | 745333  | 827831  | 1142565 | 879769  | 695955  | 792282  | 1161706 | 1168447 | 1168447 | 161072  | 989502  | 1381368 | 867477  |
| fpHILIC | Negative | 277.0859 | 2.96 | unknown | 3063384  | 2032265  | 3144457  | 1813448  | 1439783  | 1959974 | 1786747 | 2021396 | 1979628 | 2890128 | 3127527 | 1613299 | 2609799 | 4134942 | 3732766 | 388676  | 2742289 | 1380360 | 2021405 |
| EIC     | Negative | 352.8014 | 0.52 | unknown | 830399   | 350121   | 831970   | 661415   | 445599   | 503890  | 440314  | 288730  | 566907  | 102962  | 361319  | 443820  | 564213  | 255705  | 407630  | 566907  | 286632  | 447282  | 812562  |
| EIC     | Negative | 366.2728 | 5.92 | unknown | 249089   | 173406   | 254430   | 191809   | 156187   | 99857   | 182073  | 236031  | 149010  | 745537  | 184165  | 165553  | 134054  | 141151  | 225631  | 215645  | 126380  | 206664  | 145824  |
| EIC     | Negative | 290.8484 | 0.59 | unknown | 440602   | 371239   | 558831   | 432430   | 415250   | 343285  | 345424  | 308869  | 472468  | 246761  | 372497  | 339362  | 401018  | 372445  | 335352  | 407780  | 306587  | 427869  | 629862  |
| EIC     | Negative | 245.1580 | 5.24 | unknown | 878099   | 195929   | 1064522  | 838870   | 110228   | 289423  | 185485  | 567106  | 102778  | 612687  | 216799  | 212321  | 97042   | 0       | 200094  | 329531  | 29673   | 722635  | 120986  |
| EIC     | Negative | 227.1652 | 3.97 | unknown | 129952   | 89375    | 151037   | 544080   | 89375    | 151037  | 544080  | 89375   | 151037  | 544080  | 89375   | 151037  | 544080  | 89375   | 69907   | 218128  | 115427  | 185878  | 426666  |
| fpHILIC | Positive | 270.0726 | 2.74 | unknown | 1237890  | 1178765  | 1001550  | 640415   | 751629   | 1445100 | 958051  | 345148  | 576294  | 617498  | 827276  | 722346  | 653966  | 637202  | 1211470 | 1026123 | 650467  | 893214  | 776322  |
| fpHILIC | Negative | 185.1183 | 0.40 | unknown | 2107239  | 1430751  | 2114604  | 1728744  | 1124966  | 1382605 | 1600537 | 1266637 | 1659357 | 1382605 | 1525592 | 1515945 | 1583903 | 1752341 | 1598047 | 1146702 | 1769499 | 1542034 |         |
| EIC     | Negative | 644.3571 | 3.22 | unknown | 283261   | 84737    | 143739   | 137155   | 83923    | 184351  | 113264  | 110259  | 60563   | 147021  | 105086  | 199361  | 76423   | 49461   | 119663  | 99392   | 142469  | 80645   | 175588  |
| EIC     | Negative | 292.8455 | 0.52 | unknown | 2727474  | 1616943  | 3123892  | 2655679  | 1940243  | 1889370 | 1587615 | 1130681 | 2192491 | 3224585 | 1604387 | 1472529 | 1710354 | 1174970 | 1591120 | 2061569 | 144112  | 2108161 | 2668034 |
| EIC     | Negative | 395.1842 | 3.94 | unknown | 3964317  | 3143141  | 4997580  | 2678113  | 1496904  | 4564775 | 3344199 | 2825471 | 2509524 | 2133509 | 3442631 | 4500560 | 4906347 | 3925298 | 1776470 | 389107  | 3737499 | 4820965 | 2823904 |
| EIC     | Negative | 313.1813 | 3.94 | unknown | 55113004 | 42331097 | 88084235 | 43233224 | 23570039 |         |         |         |         |         |         |         |         |         |         |         |         |         |         |

|         |          |          |      |         |          |          |          |          |          |         |          |          |          |          |         |         |          |         |          |          |         |          |         |
|---------|----------|----------|------|---------|----------|----------|----------|----------|----------|---------|----------|----------|----------|----------|---------|---------|----------|---------|----------|----------|---------|----------|---------|
| EIC     | Negative | 323.0540 | 2.39 | unknown | 586950   | 220158   | 470472   | 645395   | 190583   | 201102  | 216795   | 493563   | 183489   | 641974   | 190734  | 202576  | 195502   | 199797  | 194099   | 208428   | 197886  | 643129   | 207069  |
| EIC     | Negative | 278.1766 | 3.13 | unknown | 764219   | 369120   | 617126   | 532570   | 390675   | 514172  | 455967   | 520456   | 198210   | 598499   | 525779  | 593192  | 426769   | 439521  | 580732   | 331650   | 486790  | 516539   | 430892  |
| EIC     | Negative | 120.1278 | 2.54 | unknown | 1249748  | 831742   | 851548   | 757874   | 636597   | 583321  | 612708   | 546041   | 437174   | 961956   | 715323  | 756841  | 680853   | 623762  | 762787   | 882158   | 567069  | 548175   | 420262  |
| EIC     | Negative | 552.2846 | 3.83 | unknown | 241436   | 493792   | 352099   | 402068   | 314359   | 378778  | 432356   | 331655   | 401998   | 278356   | 500679  | 539522  | 428053   | 445996  | 454705   | 466613   | 391604  | 342392   | 445011  |
| EIC     | Negative | 584.3053 | 4.00 | unknown | 153088   | 75737    | 88936    | 230534   | 85265    | 130769  | 137466   | 159357   | 113329   | 298269   | 118564  | 146826  | 157135   | 0       | 73262    | 110527   | 169011  | 325292   | 29469   |
| EIC     | Negative | 305.1384 | 3.83 | unknown | 453466   | 600947   | 543196   | 764448   | 489121   | 412728  | 628665   | 396088   | 642529   | 593436   | 549320  | 694273  | 727110   | 356118  | 653389   | 771297   | 525203  | 648775   | 307974  |
| EIC     | Negative | 237.1495 | 4.23 | unknown | 13946833 | 14262919 | 17299296 | 18728529 | 11681281 | 6242858 | 11459658 | 10102679 | 11731973 | 12597162 | 9905694 | 6630642 | 14234586 | 7672797 | 11401439 | 15804678 | 9366003 | 15388275 | 5934869 |
| fpHILIC | Positive | 176.1276 | 2.47 | unknown | 633646   | 596201   | 751423   | 555968   | 506575   | 508035  | 567122   | 468367   | 579093   | 575858   | 784871  | 736425  | 665873   | 560436  | 586890   | 750923   | 502022  | 509058   | 622956  |
| EIC     | Negative | 314.2419 | 5.99 | unknown | 146025   | 107140   | 245577   | 147705   | 50277    | 90859   | 53488    | 54292    | 126145   | 70303    | 69429   | 125856  | 111313   | 62582   | 68104    | 76787    | 83688   | 137972   | 57652   |
| EIC     | Negative | 593.2872 | 3.10 | unknown | 251406   | 47615    | 192907   | 192550   | 88394    | 162715  | 115664   | 182895   | 0        | 158196   | 79163   | 117853  | 105866   | 50213   | 133885   | 98303    | 68282   | 195402   | 125928  |
| EIC     | Negative | 505.4998 | 7.44 | unknown | 61017    | 29687    | 79421    | 106179   | 60083    | 39226   | 46413    | 81737    | 46797    | 46077    | 25363   | 81954   | 54531    | 40755   | 63285    | 67705    | 46689   | 96120    | 36606   |
| fpHILIC | Negative | 152.9958 | 2.94 | unknown | 590887   | 446452   | 540158   | 480089   | 429852   | 617729  | 458052   | 396729   | 374589   | 659261   | 739883  | 658972  | 519819   | 387526  | 528556   | 545546   | 535985  | 523462   | 444433  |
| EIC     | Negative | 305.1746 | 2.36 | unknown | 1047888  | 499026   | 1130777  | 928195   | 239958   | 375582  | 565668   | 603104   | 282381   | 547748   | 275947  | 405117  | 823973   | 226708  | 616968   | 379988   | 203865  | 692273   | 448650  |
| EIC     | Negative | 331.1309 | 1.28 | unknown | 281261   | 111241   | 97835    | 123404   | 70370    | 141615  | 9411     | 104429   | 153235   | 152984   | 177040  | 194493  | 93458    | 99918   | 183693   | 139562   | 0       | 85909    | 0       |
| EIC     | Negative | 435.1072 | 3.65 | unknown | 524238   | 632129   | 514072   | 560443   | 534286   | 589064  | 580989   | 616771   | 560224   | 599114   | 705657  | 637351  | 662606   | 626463  | 701985   | 596722   | 562280  | 761083   | 643367  |
| EIC     | Negative | 278.1765 | 3.46 | unknown | 381887   | 222688   | 274311   | 154788   | 203062   | 272878  | 200745   | 287945   | 64339    | 260309   | 189838  | 254696  | 168717   | 155216  | 316735   | 126830   | 260741  | 232766   | 229178  |
| EIC     | Negative | 319.1532 | 4.23 | unknown | 1347694  | 1370783  | 1620855  | 1706063  | 1116406  | 620489  | 973012   | 978074   | 1220664  | 1212640  | 978633  | 941157  | 1320187  | 764404  | 1109409  | 1482514  | 896407  | 1488663  | 586681  |
| EIC     | Negative | 631.2418 | 2.47 | unknown | 2807499  | 1201428  | 1790133  | 3080267  | 1198508  | 176195  | 1482404  | 2012489  | 1376609  | 1613080  | 1434882 | 1416753 | 1813921  | 713766  | 951376   | 1786210  | 1320348 | 2594122  | 1044991 |
| fpHILIC | Negative | 473.3634 | 0.37 | unknown | 1448733  | 1241979  | 1278726  | 1224273  | 1071144  | 892253  | 1355940  | 1065940  | 989829   | 1333701  | 850914  | 968548  | 1113241  | 975256  | 1560679  | 1649922  | 858077  | 1145827  | 882292  |
| EIC     | Negative | 344.7309 | 0.52 | unknown | 275774   | 27680    | 192028   | 89160    | 162670   | 90468   | 77356    | 32676    | 31307    | 262670   | 93099   | 62006   | 818725   | 83926   | 101807   | 81707    | 271195  | 0        | 0       |
| EIC     | Negative | 268.8010 | 0.64 | unknown | 1906842  | 1027411  | 2269122  | 1691051  | 1221264  | 1270155 | 1087185  | 860712   | 1567147  | 2891131  | 1067175 | 968314  | 1220781  | 1039847 | 985988   | 1315840  | 921348  | 1414463  | 2178691 |
| EIC     | Negative | 475.2667 | 3.81 | unknown | 326529   | 498610   | 461811   | 274725   | 352169   | 650004  | 319144   | 339005   | 204094   | 253374   | 488785  | 289919  | 235454   | 967075  | 572688   | 202497   | 390846  | 352301   | 598078  |
| fpHILIC | Positive | 197.0893 | 3.11 | unknown | 435727   | 300027   | 291978   | 229408   | 0        | 581683  | 302591   | 222692   | 357450   | 221633   | 285596  | 284284  | 228617   | 251825  | 335325   | 397850   | 281103  | 345622   | 303122  |
| fpHILIC | Positive | 203.1020 | 2.71 | unknown | 611717   | 346647   | 234686   | 175444   | 174500   | 393403  | 91661    | 59391    | 144992   | 190135   | 241071  | 289012  | 177478   | 419157  | 277046   | 195161   | 157208  | 96199    | 25524   |
| EIC     | Negative | 530.8041 | 0.52 | unknown | 1295684  | 572472   | 1291466  | 958659   | 719845   | 773265  | 587716   | 1205499  | 885717   | 1564773  | 574944  | 488231  | 583395   | 377466  | 581883   | 846584   | 444142  | 750771   | 1320825 |
| EIC     | Negative | 266.1399 | 2.25 | unknown | 241620   | 363368   | 55871    | 776304   | 509357   | 364198  | 225246   | 577041   | 259665   | 370451   | 228682  | 454405  | 164161   | 316790  | 616387   | 536975   | 210010  | 86219    | 0       |
| EIC     | Negative | 397.1997 | 3.76 | unknown | 2696147  | 1637469  | 2920251  | 1845865  | 1030965  | 1359104 | 1985788  | 1653600  | 1294708  | 1336030  | 1302985 | 1964517 | 2244688  | 1627472 | 1286764  | 1895859  | 1777665 | 2304421  | 1063206 |
| EIC     | Negative | 236.1050 | 2.90 | unknown | 194514   | 130799   | 78117    | 88402    | 129784   | 86350   | 91367    | 105699   | 107857   | 83709    | 140798  | 95916   | 134392   | 89013   | 143082   | 90427    | 138493  | 86696    | 134117  |
| EIC     | Negative | 400.6813 | 0.64 | unknown | 149105   | 77970    | 201375   | 136303   | 75280    | 97677   | 73768    | 61757    | 126497   | 235628   | 75459   | 71302   | 90227    | 34373   | 62919    | 100135   | 61535   | 108566   | 161939  |
| fpHILIC | Positive | 169.0944 | 5.22 | unknown | 3563220  | 4288105  | 3288131  | 2787788  | 2889760  | 3853950 | 3187785  | 2341128  | 3346854  | 2722581  | 3843034 | 3846731 | 3651063  | 3537702 | 4374931  | 3601981  | 3247555 | 3048960  | 3506373 |
| EIC     | Negative | 534.9526 | 0.55 | unknown | 257662   | 140783   | 163774   | 301334   | 69504    | 280467  | 132388   | 93011    | 66333    | 130336   | 166542  | 198248  | 127747   | 0       | 155575   | 195739   | 106218  | 155014   | 118169  |
| EIC     | Negative | 526.2444 | 0.69 | unknown | 78446    | 133998   | 85195    | 65769    | 53045    | 75874   | 86826    | 107296   | 42356    | 47948    | 105165  | 114357  | 104866   | 50950   | 78657    | 64056    | 66123   | 128910   | 78364   |
| fpHILIC | Positive | 189.1228 | 2.90 | unknown | 5667066  | 3160201  | 2826510  | 2789911  | 2846456  | 3517961 | 2263601  | 1851733  | 2445375  | 3052352  | 2754679 | 2765944 | 2191515  | 2482409 | 3738962  | 3208473  | 2550104 | 2914105  | 2307570 |
| EIC     | Negative | 279.1581 | 4.08 | unknown | 18574    | 79774    | 120331   | 468047   | 16266    | 112951  | 170956   | 164741   | 16621    | 21394    | 144729  | 22869   | 16995    | 57316   | 24941    | 178869   | 19593   | 258861   | 66143   |
| EIC     | Negative | 448.6673 | 0.64 | unknown | 104429   | 54130    | 147990   | 92555    | 57801    | 69708   | 53816    | 36533    | 80555    | 174118   | 52406   | 64636   | 64436    | 17937   | 47101    | 66638    | 15993   | 70994    | 109333  |
| EIC     | Negative | 637.3536 | 5.14 | unknown | 402081   | 239278   | 341116   | 330900   | 290856   | 197217  | 225788   | 368619   | 341667   | 463562   | 305855  | 234564  | 291786   | 273820  | 281226   | 303390   | 316004  | 414549   | 307301  |
| EIC     | Negative | 329.1762 | 2.32 | unknown | 577212   | 360777   | 962520   | 330900   | 267231   | 153686  | 378904   | 394398   | 202664   | 432620   | 315592  | 239880  | 153644   | 119649  | 196499   | 390797   | 288181  | 625299   | 296700  |
| fpHILIC | Positive | 129.0658 | 3.40 | unknown | 2905380  | 1864601  | 3213195  | 5378559  | 2504299  | 1981235 | 2088558  | 2033705  | 2122270  | 7905241  | 2050794 | 1793518 | 1898133  | 1220460 | 2232324  | 1982620  | 2156755 | 2789994  | 2549887 |
| fpHILIC | Negative | 242.9968 | 4.05 | unknown | 917165   | 380737   | 348063   | 1125876  | 386021   | 411448  | 468177   | 433817   | 608411   | 2909487  | 473181  | 340751  | 330815   | 234615  | 428414   | 357237   | 710683  | 537336   | 0       |
| EIC     | Negative | 292.8456 | 0.59 | unknown | 554843   | 470892   | 721820   | 536172   | 499832   | 406869  | 438145   | 354512   | 603256   | 971731   | 463416  | 392230  | 461811   | 461842  | 404045   | 494001   | 382054  | 516881   | 826880  |
| EIC     | Negative | 240.1604 | 2.66 | unknown | 5330573  | 2035338  | 2663904  | 7730030  | 2444782  | 5788366 | 3319152  | 4126014  | 3122649  | 3122649  | 4967764 | 4392834 | 935938   | 4022454 | 990600   | 4507989  | 4236707 | 1549318  | 0       |
| fpHILIC | Negative | 285.1021 | 3.62 | unknown | 501717   | 313239   | 400254   | 442576   | 260294   | 250622  | 251240   | 347252   | 258939   | 379943   | 324756  | 329174  | 305692   | 175898  | 369695   | 330405   | 257411  | 428831   | 170103  |
| fpHILIC | Positive | 247.1740 | 1.65 | unknown | 567974   | 301514   | 397333   | 342281   | 199985   | 418008  | 218124   | 175537   | 266163   | 385794   | 382595  | 263338  | 271847   | 484172  | 503359   | 315011   | 166411  | 181283   | 302954  |
| fpHILIC | Negative | 191.0579 | 0.86 | unknown | 749082   | 546710   | 533327   | 636192   | 379271   | 523319  | 445422   | 481435   | 424109   | 587103   | 652449  | 724420  | 475763   | 763220  | 918480   | 0        | 415556  | 663348   | 572331  |
| EIC     | Negative | 592.3280 | 2.68 | unknown | 484947   | 469579   | 405890   | 291631   | 411206   | 478437  | 491849   | 320510   | 434671   | 377469   | 487214  | 579245  | 0        | 504558  | 417568   | 526410   | 456064  | 255821   | 781253  |
| EIC     | Negative | 266.8039 | 0.64 | unknown | 1190986  | 646434   | 1415428  | 1049273  | 741716   | 796660  | 674556   | 526279   | 973465   | 1769042  | 672914  | 596024  | 765136   | 631921  | 606424   | 811862   | 577114  | 869768   | 1370935 |
| EIC     | Negative | 238.1529 | 4.23 | unknown | 2174249  | 2263536  | 2714915  | 2954970  | 1846604  | 990932  | 1768689  | 1549851  | 1808855  | 1972903  | 1531516 | 1562503 | 1189773  | 1222691 | 1755018  | 2503946  | 1534049 | 2399578  | 905445  |
| EIC     | Negative | 398.2030 | 3.76 | unknown | 609673   | 391174   | 725983   | 484668   | 252735   | 349429  | 496004   | 415202   | 307668   | 338691   | 300844  | 455371  | 546426   | 429755  | 319352   | 467048   | 418827  | 601802   | 272138  |
| fpHILIC | Positive | 117.0568 | 2.61 | unknown | 440286   | 497111   | 373414   | 298339   | 378938   |         |          |          |          |          |         |         |          |         |          |          |         |          |         |



|         |          |          |      |         |          |         |         |         |         |          |         |          |          |         |         |          |          |          |         |          |          |          |          |
|---------|----------|----------|------|---------|----------|---------|---------|---------|---------|----------|---------|----------|----------|---------|---------|----------|----------|----------|---------|----------|----------|----------|----------|
| fpHILIC | Negative | 134.0176 | 4.15 | unknown | 6520198  | 5588658 | 5158013 | 5221971 | 5572376 | 5260573  | 5045346 | 4800073  | 3582166  | 6340485 | 5125540 | 4862573  | 3300504  | 6392188  | 7655927 | 3962708  | 4935217  | 6113941  | 5239745  |
| fpHILIC | Negative | 269.0546 | 2.69 | unknown | 6787334  | 5484466 | 4522731 | 6741536 | 4940711 | 6955863  | 6218804 | 3484550  | 3310141  | 4090377 | 2993949 | 5118482  | 3205588  | 3956012  | 6092520 | 3601405  | 4029370  | 3842719  | 11037411 |
| EIC     | Negative | 580.2925 | 2.63 | unknown | 4412231  | 60781   | 3898989 | 3847091 | 78436   | 96545    | 4356648 | 407319   | 4291971  | 170167  | 186212  | 106083   | 404620   | 404620   | 230904  | 122799   | 156016   | 5175907  | 153648   |
| EIC     | Negative | 313.1455 | 2.22 | unknown | 532891   | 227604  | 587499  | 373644  | 167837  | 345725   | 375831  | 413031   | 452483   | 407306  | 196837  | 609027   | 355102   | 331394   | 131712  | 348582   | 323259   | 728637   | 487353   |
| EIC     | Negative | 297.1692 | 2.52 | unknown | 393172   | 157725  | 369462  | 0       | 0       | 147680   | 56669   | 92492    | 142021   | 139414  | 0       | 140973   | 309463   | 102500   | 73247   | 61381    | 39171    | 94142    | 128755   |
| EIC     | Negative | 504.1308 | 0.71 | unknown | 178131   | 117803  | 187411  | 61955   | 111198  | 129564   | 108570  | 43523    | 123412   | 215636  | 125628  | 91672    | 106570   | 218683   | 97770   | 104229   | 74490    | 49534    | 266327   |
| EIC     | Negative | 528.6739 | 0.52 | unknown | 431932   | 206200  | 664965  | 420335  | 237497  | 310658   | 227420  | 107862   | 443094   | 587727  | 138253  | 198679   | 112443   | 0        | 157085  | 379358   | 165694   | 351965   | 455123   |
| fpHILIC | Negative | 259.0634 | 0.37 | unknown | 1402923  | 3181938 | 2060936 | 1073668 | 1363760 | 1441049  | 2590890 | 2140900  | 1520205  | 1294611 | 3738248 | 4228248  | 2185096  | 4001812  | 3190978 | 1913802  | 1368470  | 1228341  | 2412679  |
| EIC     | Negative | 279.1583 | 4.44 | unknown | 2731759  | 613412  | 1478442 | 2185055 | 710723  | 690877   | 890876  | 1354286  | 321832   | 1378955 | 641141  | 1344710  | 1082736  | 345185   | 756221  | 926016   | 664388   | 1746496  | 4762493  |
| EIC     | Negative | 388.7126 | 0.64 | unknown | 262365   | 138908  | 356918  | 239412  | 148015  | 169747   | 139885  | 105974   | 221206   | 419890  | 143466  | 122619   | 161216   | 74370    | 123488  | 170723   | 116616   | 187621   | 306611   |
| EIC     | Negative | 338.2363 | 2.06 | unknown | 250406   | 271373  | 133331  | 131405  | 179512  | 197962   | 194623  | 101559   | 178417   | 110490  | 195673  | 189477   | 274377   | 256185   | 222257  | 195449   | 228059   | 122048   | 214068   |
| EIC     | Negative | 358.2516 | 5.78 | unknown | 347255   | 266985  | 322772  | 367133  | 262181  | 247356   | 301839  | 351402   | 261542   | 383416  | 320603  | 274357   | 291271   | 245876   | 310833  | 266750   | 326401   | 409278   | 328506   |
| fpHILIC | Positive | 146.1174 | 2.05 | unknown | 806584   | 761129  | 913705  | 886091  | 612391  | 549948   | 877911  | 455640   | 909256   | 610898  | 871115  | 954680   | 1050841  | 679477   | 551807  | 1003104  | 903032   | 910622   | 557777   |
| fpHILIC | Negative | 163.1127 | 0.40 | unknown | 1883328  | 970633  | 1319041 | 2070864 | 656415  | 1086336  | 876793  | 1368616  | 495431   | 1520759 | 685438  | 1172390  | 863512   | 477203   | 1217393 | 1094936  | 765725   | 1450485  | 643310   |
| EIC     | Negative | 512.2735 | 2.08 | unknown | 12513956 | 2817486 | 9728611 | 0       | 1418204 | 1649946  | 1962511 | 0        | 1115823  | 4619764 | 2444656 | 223697   | 1396761  | 1864994  | 1736196 | 3566820  | 524921   | 0        | 1267004  |
| fpHILIC | Negative | 369.0614 | 1.99 | unknown | 1814556  | 740266  | 749300  | 2112518 | 616245  | 503032   | 976014  | 1160383  | 2467917  | 1437596 | 1260499 | 1157188  | 2296977  | 1754236  | 1685300 | 909291   | 2002347  | 1255535  | 756628   |
| EIC     | Negative | 259.1915 | 2.62 | unknown | 289328   | 204338  | 528575  | 848386  | 272840  | 381743   | 309378  | 385588   | 359383   | 848395  | 337635  | 453753   | 470138   | 541779   | 173565  | 362345   | 381535   | 669997   | 386583   |
| EIC     | Negative | 352.3297 | 6.74 | unknown | 174195   | 160870  | 171616  | 228616  | 210920  | 147816   | 165800  | 147813   | 124487   | 219185  | 205317  | 280479   | 148160   | 133694   | 195213  | 163043   | 174572   | 304149   | 147056   |
| fpHILIC | Negative | 317.0356 | 2.67 | unknown | 59039376 | 8551389 | 6531750 | 6814504 | 7992450 | 18954404 | 2723071 | 11781235 | 20284924 | 7008732 | 5325468 | 17875974 | 12261237 | 15055651 | 5368623 | 15759388 | 16812818 | 21672856 | 11746658 |
| EIC     | Negative | 386.7160 | 0.64 | unknown | 491235   | 270733  | 648315  | 452557  | 295450  | 321684   | 264540  | 195079   | 421890   | 804912  | 281952  | 246092   | 312891   | 149481   | 232332  | 331811   | 219588   | 367993   | 583231   |
| EIC     | Negative | 412.7570 | 0.52 | unknown | 293994   | 135796  | 389423  | 296411  | 195950  | 226370   | 175658  | 82833    | 261555   | 390986  | 176118  | 181286   | 229749   | 65031    | 160560  | 224755   | 152489   | 247939   | 305276   |
| fpHILIC | Positive | 217.1294 | 3.42 | unknown | 986468   | 789169  | 825908  | 286111  | 737344  | 989213   | 704434  | 740634   | 757297   | 791835  | 769891  | 851129   | 615752   | 998871   | 1066462 | 887592   | 591809   | 926444   | 794607   |
| EIC     | Negative | 442.6774 | 0.64 | unknown | 359425   | 195361  | 525031  | 371803  | 215961  | 242161   | 198971  | 156549   | 317941   | 629098  | 209336  | 187603   | 239884   | 105283   | 173857  | 250406   | 164483   | 284439   | 438028   |
| EIC     | Negative | 298.2470 | 4.92 | unknown | 740987   | 525931  | 1207699 | 1400523 | 719544  | 769564   | 769560  | 1111546  | 1212012  | 669481  | 564388  | 902060   | 941051   | 629775   | 333129  | 2190694  | 881621   | 1331278  | 574672   |
| fpHILIC | Positive | 300.1992 | 0.98 | unknown | 2789896  | 1416914 | 1941097 | 2940159 | 1369741 | 1589940  | 1711964 | 1656357  | 1354762  | 2164196 | 1577374 | 1726604  | 2066797  | 699483   | 1615396 | 1772053  | 1871024  | 2607482  | 1040555  |
| EIC     | Negative | 382.7227 | 0.64 | unknown | 234950   | 121632  | 291042  | 202979  | 129850  | 141743   | 123162  | 91973    | 185807   | 356638  | 123668  | 106665   | 139367   | 69616    | 101435  | 155772   | 100333   | 152726   | 270432   |
| EIC     | Negative | 357.1346 | 3.17 | unknown | 381519   | 168515  | 113699  | 15561   | 131628  | 102444   | 142177  | 86491    | 87158    | 72062   | 161438  | 6965     | 20306    | 46330    | 82857   | 496475   | 7750     | 10449    | 41002    |
| EIC     | Negative | 517.2774 | 3.11 | unknown | 179565   | 116668  | 0       | 75406   | 142612  | 63493    | 0       | 87655    | 0        | 68685   | 115108  | 72759    | 88122    | 100676   | 75555   | 142672   | 0        | 124787   |          |
| EIC     | Negative | 310.2107 | 4.12 | unknown | 306415   | 153700  | 386157  | 170284  | 139912  | 219836   | 141911  | 288091   | 59403    | 286353  | 129904  | 164480   | 96884    | 250603   | 219806  | 83330    | 134252   | 312370   | 336916   |
| fpHILIC | Positive | 253.0318 | 3.23 | unknown | 814883   | 530784  | 346119  | 572074  | 392852  | 627091   | 328974  | 313286   | 486878   | 818377  | 328129  | 437981   | 497223   | 339088   | 456056  | 596070   | 437584   | 575398   | 435453   |
| EIC     | Negative | 419.1128 | 0.46 | unknown | 160322   | 147138  | 63740   | 72720   | 77905   | 142631   | 101868  | 93127    | 71755    | 87855   | 114906  | 88192    | 131660   | 83992    | 178948  | 147565   | 62097    | 79011    | 99020    |
| fpHILIC | Positive | 204.1337 | 3.59 | unknown | 759071   | 471930  | 548839  | 567048  | 545753  | 634654   | 442733  | 466082   | 518368   | 606042  | 639600  | 603728   | 582085   | 431489   | 641864  | 702655   | 551355   | 596722   | 539909   |
| EIC     | Negative | 526.6770 | 0.52 | unknown | 682330   | 310537  | 623653  | 761627  | 149886  | 598800   | 381090  | 147141   | 564165   | 879080  | 271341  | 272568   | 423396   | 0        | 337703  | 600782   | 230471   | 507206   | 734238   |
| EIC     | Negative | 506.1271 | 0.71 | unknown | 116388   | 76734   | 127408  | 46295   | 70906   | 85510    | 80968   | 33615    | 79760    | 152457  | 87192   | 61855    | 73329    | 155294   | 69399   | 64308    | 54259    | 35056    | 185020   |
| EIC     | Negative | 510.9076 | 0.55 | unknown | 307107   | 67122   | 171447  | 246888  | 95751   | 220432   | 99859   | 0        | 83068    | 196301  | 123493  | 124990   | 62221    | 0        | 83452   | 191944   | 34551    | 95722    | 174969   |
| EIC     | Negative | 444.6737 | 0.64 | unknown | 414050   | 218009  | 577902  | 402285  | 241548  | 295988   | 220238  | 158248   | 353618   | 704123  | 222784  | 207190   | 263505   | 111182   | 184588  | 276986   | 182197   | 309719   | 481947   |
| EIC     | Negative | 309.1709 | 3.49 | unknown | 175380   | 144124  | 149505  | 227500  | 137246  | 115344   | 145727  | 127500   | 145720   | 145456  | 153532  | 201151   | 130822   | 154556   | 163844  | 143416   | 224043   | 164646   | 164646   |
| EIC     | Negative | 446.6702 | 0.64 | unknown | 254669   | 136821  | 358492  | 251403  | 146332  | 173609   | 137446  | 98674    | 218832   | 426043  | 138475  | 126857   | 161168   | 59838    | 116273  | 173251   | 114161   | 193846   | 309770   |
| EIC     | Negative | 524.6803 | 0.52 | unknown | 613017   | 266314  | 640606  | 271403  | 334772  | 427683   | 304838  | 160183   | 504681   | 0       | 243867  | 152510   | 300953   | 0        | 243867  | 103568   | 136883   | 472440   | 665956   |
| fpHILIC | Positive | 143.0485 | 3.24 | unknown | 3552471  | 3623280 | 2868696 | 2665348 | 2112811 | 3150838  | 2023846 | 1761860  | 2778689  | 1888829 | 1952131 | 2473694  | 2883542  | 2285428  | 2569062 | 3285168  | 2566570  | 2917861  | 2445311  |
| EIC     | Negative | 297.2436 | 4.92 | unknown | 3809228  | 5267482 | 5920274 | 6991476 | 3594677 | 3891166  | 5946713 | 5968173  | 5182722  | 1531897 | 2726353 | 4340260  | 4555462  | 3221326  | 1748690 | 10918691 | 4417483  | 6880287  | 2704360  |
| fpHILIC | Positive | 488.1764 | 3.18 | unknown | 1035160  | 1035500 | 853215  | 796916  | 899523  | 879178   | 887976  | 714827   | 835431   | 760685  | 1184742 | 1142366  | 1130784  | 1012024  | 1129626 | 994722   | 940306   | 802968   | 1047399  |
| EIC     | Negative | 551.2511 | 1.11 | unknown | 176093   | 128770  | 196493  | 151032  | 81818   | 75315    | 137387  | 62497    | 102554   | 160183  | 130434  | 147975   | 162316   | 77269    | 87210   | 145326   | 118627   | 107228   | 77279    |
| EIC     | Negative | 392.2226 | 2.15 | unknown | 322152   | 101922  | 558586  | 231310  | 101479  | 213047   | 120508  | 213320   | 87614    | 105687  | 169755  | 122024   | 212528   | 152331   | 233809  | 133104   | 246175   | 124587   | 120583   |
| fpHILIC | Negative | 93.0455  | 2.67 | unknown | 1051229  | 166921  | 120556  | 127623  | 131755  | 189647   | 53387   | 102508   | 403343   | 128535  | 100996  | 354759   | 327777   | 329451   | 109706  | 305405   | 306748   | 429628   | 201744   |
| fpHILIC | Negative | 188.1029 | 3.17 | unknown | 1629320  | 1675443 | 2127972 | 1712996 | 1421283 | 1315152  | 1908357 | 1727489  | 1526427  | 2221193 | 1355269 | 1260079  | 1494355  | 1528393  | 1962601 | 1507287  | 1730858  | 2205594  | 1806903  |
| EIC     | Positive | 411.1082 | 0.69 | unknown | 174684   | 113386  | 106356  | 83672   | 8061    | 131304   | 86296   | 75462    | 75427    | 175727  | 107954  | 101493   | 90802    | 123886   | 117025  | 158277   | 74409    | 77167    | 99369    |
| EIC     | Negative | 257.1760 | 3.11 | unknown | 341778   | 215745  | 315157  | 203742  | 189429  | 198664   | 230312  | 202249   | 198912   | 205683  | 207869  | 311275   | 379273   | 250637   | 195445  | 246749   | 241311   | 273862   | 232408   |
| EIC     | Negative | 343.2495 | 3.84 | unknown | 130959   | 90037   |         |         |         |          |         |          |          |         |         |          |          |          |         |          |          |          |          |

|         |          |          |      |         |          |          |          |          |          |          |          |          |          |          |          |          |          |          |          |          |          |          |          |
|---------|----------|----------|------|---------|----------|----------|----------|----------|----------|----------|----------|----------|----------|----------|----------|----------|----------|----------|----------|----------|----------|----------|----------|
| EIC     | Negative | 266.1454 | 3.72 | unknown | 215106   | 86101    | 163231   | 200693   | 97111    | 112033   | 121656   | 112790   | 49923    | 172818   | 87948    | 154197   | 143055   | 42530    | 108489   | 113781   | 96941    | 198101   | 65616    |
| fpHILIC | Negative | 233.0777 | 3.94 | unknown | 545883   | 351609   | 289041   | 285325   | 253106   | 409938   | 230327   | 217018   | 253640   | 306072   | 301374   | 306500   | 308845   | 291063   | 362086   | 344566   | 321059   | 285708   | 298176   |
| fpHILIC | Positive | 158.0443 | 2.71 | unknown | 817141   | 557463   | 765961   | 837399   | 420455   | 613739   | 333879   | 697111   | 313602   | 669530   | 551999   | 718784   | 597327   | 589770   | 550265   | 643239   | 412245   | 692860   | 528416   |
| EIC     | Negative | 562.5862 | 0.64 | unknown | 239235   | 121945   | 379683   | 268351   | 123350   | 142869   | 119261   | 98847    | 496634   | 413259   | 121836   | 112750   | 140966   | 0        | 97875    | 153013   | 95094    | 185323   | 276568   |
| EIC     | Negative | 341.2112 | 5.01 | unknown | 215517   | 140741   | 238690   | 287645   | 144468   | 136268   | 164297   | 164297   | 164297   | 228234   | 172657   | 171611   | 125179   | 112756   | 180512   | 161300   | 146892   | 256115   | 139395   |
| EIC     | Negative | 285.2073 | 4.43 | unknown | 1013363  | 1327958  | 1169340  | 1268679  | 787159   | 719964   | 967986   | 618996   | 618996   | 963466   | 944773   | 1235970  | 1180349  | 963297   | 1201152  | 1131899  | 945988   | 1015720  | 812382   |
| EIC     | Negative | 556.3723 | 2.91 | unknown | 209058   | 532546   | 692861   | 1681510  | 341993   | 881459   | 454723   | 0        | 115311   | 0        | 557983   | 1281410  | 981658   | 142113   | 646703   | 484282   | 580546   | 0        | 420030   |
| fpHILIC | Positive | 257.3070 | 2.69 | unknown | 1000010  | 756972   | 599799   | 6073702  | 743116   | 858311   | 770906   | 513682   | 476135   | 696994   | 433011   | 788006   | 543803   | 614248   | 726682   | 586850   | 719130   | 554103   | 1394673  |
| EIC     | Negative | 135.1563 | 3.65 | unknown | 673070   | 622712   | 604707   | 508240   | 585324   | 543951   | 530707   | 672978   | 490122   | 436497   | 627860   | 509827   | 595780   | 499044   | 583836   | 594883   | 652929   | 786276   | 726294   |
| fpHILIC | Negative | 135.0184 | 4.15 | unknown | 1490830  | 1219728  | 1294532  | 1201338  | 1301973  | 1170926  | 1237529  | 1135434  | 866878   | 1372122  | 1184915  | 1165278  | 815690   | 1529946  | 1775850  | 977257   | 1199667  | 1627089  | 1186436  |
| fpHILIC | Positive | 262.1275 | 3.12 | unknown | 917749   | 774980   | 325342   | 584829   | 615024   | 810961   | 529537   | 393309   | 574885   | 365558   | 414543   | 627050   | 479170   | 478835   | 505435   | 1119679  | 547626   | 458452   | 833039   |
| EIC     | Negative | 502.3032 | 4.00 | unknown | 6005134  | 3146342  | 5076528  | 11069661 | 3309122  | 5417799  | 6247853  | 6805017  | 4960546  | 9800415  | 5928620  | 6339447  | 7274126  | 1317771  | 3948740  | 5343995  | 7324424  | 12772777 | 2306049  |
| EIC     | Negative | 549.3048 | 2.34 | unknown | 312496   | 104284   | 410878   | 131475   | 54129    | 87811    | 90633    | 235730   | 25785    | 262401   | 93406    | 87373    | 57989    | 130094   | 86585    | 39126    | 38924    | 296220   | 125045   |
| EIC     | Negative | 448.2571 | 2.48 | unknown | 264629   | 93738    | 386646   | 965934   | 128587   | 252162   | 237774   | 672837   | 143038   | 743023   | 198705   | 320865   | 404695   | 49755    | 124709   | 65371    | 397889   | 1006078  | 107074   |
| EIC     | Negative | 354.7988 | 0.52 | unknown | 277708   | 155303   | 251123   | 242146   | 139648   | 180619   | 195808   | 95433    | 247624   | 325108   | 149268   | 131491   | 170547   | 76555    | 168358   | 247438   | 129736   | 202631   | 271123   |
| EIC     | Negative | 317.1146 | 0.78 | unknown | 847285   | 716161   | 1203223  | 1214782  | 599858   | 376833   | 755538   | 847363   | 386236   | 884923   | 117346   | 732578   | 846048   | 340237   | 462684   | 789532   | 576555   | 1368561  | 322335   |
| fpHILIC | Negative | 270.0583 | 2.70 | unknown | 602517   | 462787   | 385252   | 632214   | 419998   | 656853   | 500092   | 300039   | 312972   | 423827   | 273370   | 513922   | 298459   | 379698   | 507110   | 316316   | 366900   | 349627   | 1061530  |
| fpHILIC | Positive | 207.1123 | 2.07 | unknown | 3518824  | 2362070  | 3032326  | 2089468  | 1980703  | 2199452  | 2342326  | 2437441  | 2327531  | 2980481  | 2237479  | 2369864  | 2098931  | 3069240  | 3520454  | 2524308  | 1951472  | 3000049  | 2414010  |
| EIC     | Negative | 273.1722 | 1.84 | unknown | 95352    | 61198    | 50286    | 0        | 54819    | 102043   | 41660    | 0        | 31250    | 0        | 43833    | 62520    | 68518    | 69922    | 67549    | 76112    | 62098    | 0        | 67279    |
| fpHILIC | Positive | 302.2146 | 0.97 | unknown | 2238108  | 1038722  | 1704438  | 2610299  | 1032109  | 1108192  | 1367973  | 1376003  | 1110115  | 1161928  | 1316573  | 1503020  | 1630165  | 518339   | 1076186  | 1605653  | 1427839  | 2290443  | 72450    |
| EIC     | Negative | 258.2158 | 6.09 | unknown | 127064   | 80358    | 135882   | 110414   | 26494    | 81369    | 87743    | 80743    | 34192    | 64641    | 51463    | 88293    | 93602    | 59439    | 82242    | 92319    | 73594    | 83026    | 27340    |
| EIC     | Negative | 299.1873 | 2.31 | unknown | 259819   | 108338   | 267254   | 208473   | 93003    | 159474   | 136064   | 231270   | 80440    | 344840   | 131431   | 141997   | 156973   | 98448    | 125179   | 12302    | 130793   | 326631   | 123858   |
| EIC     | Negative | 130.1664 | 2.40 | unknown | 286126   | 173882   | 223002   | 211830   | 159606   | 136596   | 151798   | 256078   | 150848   | 237189   | 183386   | 155254   | 187362   | 138169   | 189895   | 140811   | 188052   | 315465   | 182535   |
| EIC     | Negative | 313.2027 | 2.66 | unknown | 738943   | 337821   | 758435   | 364835   | 295658   | 382811   | 198158   | 344458   | 105114   | 675004   | 248466   | 474312   | 216565   | 266719   | 229930   | 105188   | 257837   | 547222   | 339296   |
| EIC     | Negative | 464.7238 | 0.52 | unknown | 348669   | 138151   | 457717   | 338815   | 323293   | 243462   | 99670    | 90473    | 359382   | 462101   | 173838   | 73257    | 205237   | 0        | 161077   | 251189   | 145570   | 294521   | 368530   |
| EIC     | Negative | 500.6365 | 0.64 | unknown | 283938   | 152710   | 421212   | 288912   | 153143   | 180872   | 148186   | 241378   | 505240   | 157541   | 141324   | 180891   | 59436    | 119548   | 119548   | 191168   | 120567   | 129421   | 1476292  |
| fpHILIC | Negative | 138.0390 | 2.67 | unknown | 3755719  | 617303   | 448570   | 438946   | 522430   | 1253876  | 163602   | 717472   | 1292214  | 438884   | 361265   | 1168772  | 759376   | 1085091  | 358873   | 1036316  | 1093605  | 1469340  | 746063   |
| EIC     | Negative | 470.7155 | 0.52 | unknown | 525761   | 174468   | 394060   | 414419   | 248738   | 259468   | 248205   | 108243   | 342363   | 512802   | 194152   | 182589   | 245624   | 56007    | 186536   | 336822   | 205350   | 278722   | 430718   |
| EIC     | Negative | 558.5952 | 0.64 | unknown | 199720   | 108309   | 315371   | 211643   | 108971   | 133895   | 106516   | 84554    | 183150   | 358615   | 107868   | 98733    | 128694   | 38820    | 90271    | 145236   | 96248    | 159633   | 243958   |
| EIC     | Negative | 464.3102 | 3.11 | unknown | 228033   | 16000    | 276027   | 179994   | 37349    | 34133    | 12881    | 404102   | 39893    | 311831   | 41756    | 35002    | 35157    | 51306    | 35328    | 16197    | 42633    | 153398   | 0        |
| EIC     | Negative | 466.7210 | 0.52 | unknown | 798471   | 408336   | 785108   | 871667   | 525205   | 555584   | 346476   | 232854   | 487850   | 1037723  | 466853   | 395429   | 463280   | 0        | 383868   | 422881   | 354854   | 578680   | 802334   |
| EIC     | Negative | 317.1146 | 1.05 | unknown | 141333   | 84746    | 151919   | 170122   | 81668    | 57725    | 89706    | 111588   | 53639    | 114538   | 93712    | 86165    | 100391   | 49911    | 59031    | 98260    | 73064    | 192993   | 47422    |
| fpHILIC | Positive | 147.0452 | 2.06 | unknown | 1341896  | 637047   | 835358   | 508764   | 485266   | 515575   | 597854   | 470725   | 645342   | 735000   | 589638   | 669034   | 545223   | 917154   | 924701   | 629717   | 539684   | 788325   | 717577   |
| EIC     | Negative | 464.2058 | 0.76 | unknown | 191345   | 477463   | 229644   | 167955   | 211181   | 299917   | 302054   | 300875   | 142673   | 180943   | 298840   | 400017   | 449940   | 274001   | 263160   | 218777   | 221964   | 343568   | 453461   |
| EIC     | Negative | 385.2016 | 4.90 | unknown | 420477   | 564317   | 561809   | 613626   | 560308   | 482697   | 514899   | 500766   | 419238   | 582817   | 628026   | 629669   | 633317   | 688064   | 641047   | 628776   | 607937   | 564882   | 517630   |
| fpHILIC | Positive | 157.0969 | 2.79 | unknown | 2938967  | 2374955  | 2436268  | 1987523  | 2068224  | 2163835  | 1905761  | 1950708  | 1778113  | 1969419  | 1897777  | 2159473  | 1756620  | 2292073  | 2726065  | 2206750  | 2137993  | 2292343  | 2428260  |
| fpHILIC | Positive | 175.0705 | 2.70 | unknown | 2949365  | 2177094  | 2936973  | 3086846  | 1825591  | 2053525  | 1401498  | 2061101  | 2515417  | 2432730  | 2004079  | 1904132  | 2411499  | 2085550  | 2649710  | 1279740  | 2297365  | 2217926  | 2482610  |
| EIC     | Negative | 343.2116 | 3.64 | unknown | 1958893  | 406365   | 2483634  | 590642   | 257585   | 696408   | 472120   | 1020414  | 150541   | 1123324  | 311874   | 621255   | 278423   | 668327   | 472015   | 195235   | 425005   | 1304507  | 711726   |
| EIC     | Negative | 529.3324 | 4.98 | unknown | 3051735  | 1745573  | 2839537  | 7360093  | 1553481  | 2879664  | 3167724  | 3452374  | 2793951  | 5868984  | 3132753  | 3037821  | 4066239  | 505314   | 2095662  | 2903461  | 3674814  | 7003981  | 907642   |
| fpHILIC | Positive | 480.3079 | 0.50 | unknown | 2175710  | 2584604  | 2180749  | 1464627  | 2030197  | 2443072  | 2152899  | 1667082  | 1197330  | 1259102  | 1966829  | 2345605  | 1364753  | 2918801  | 2182355  | 2553368  | 2205312  | 1646326  | 2728219  |
| fpHILIC | Positive | 376.0506 | 3.23 | unknown | 1545034  | 979300   | 622440   | 946321   | 575566   | 987676   | 488227   | 463213   | 890491   | 564048   | 457856   | 736153   | 755419   | 589020   | 643597   | 1111210  | 791368   | 911353   | 622591   |
| EIC     | Negative | 501.3010 | 4.00 | unknown | 18979268 | 9331346  | 16082186 | 36016684 | 10085624 | 17148976 | 19974188 | 21512897 | 15720848 | 32135195 | 19318099 | 20097191 | 23844662 | 3206403  | 11335872 | 16962295 | 23980147 | 42335338 | 6585401  |
| fpHILIC | Positive | 367.1644 | 3.62 | unknown | 1824534  | 1000211  | 1218379  | 1184165  | 711389   | 800829   | 634659   | 944279   | 626472   | 1274592  | 893340   | 920502   | 742485   | 854562   | 1109690  | 780492   | 672408   | 1235191  | 567169   |
| EIC     | Negative | 331.1541 | 3.27 | unknown | 276678   | 200542   | 411435   | 138399   | 124708   | 190826   | 107868   | 196025   | 68784    | 307623   | 174253   | 172548   | 103265   | 216979   | 221394   | 80378    | 129772   | 211969   | 181375   |
| EIC     | Negative | 474.2736 | 2.97 | unknown | 538433   | 200502   | 599220   | 1075880  | 231291   | 345757   | 451099   | 870364   | 612843   | 1036400  | 357619   | 322790   | 667387   | 53030    | 224394   | 368816   | 566801   | 1722809  | 127673   |
| EIC     | Negative | 227.1478 | 2.33 | unknown | 294412   | 191927   | 122473   | 219571   | 81973    | 250731   | 98428    | 108796   | 50891    | 195427   | 120226   | 152582   | 99159    | 59236    | 192043   | 105980   | 158072   | 160158   | 91995    |
| EIC     | Negative | 502.6136 | 0.64 | unknown | 352624   | 193225   | 538151   | 359223   | 196635   | 226132   | 179449   | 135500   | 305266   | 655139   | 194125   | 169232   | 215125   | 73733    | 158177   | 237576   | 157056   | 273864   | 424149   |
| fpHILIC | Positive | 117.0739 | 2.79 | unknown | 48807904 | 44935664 | 42474920 | 31037900 | 35048736 | 44933384 | 31510628 | 31895312 | 30281012 | 45488324 | 36719388 | 38313480 | 31547514 | 46167368 | 57224404 | 34223612 | 31903996 | 40546762 | 42642560 |

|         |          |            |      |         |          |          |          |          |          |          |          |          |          |          |          |          |          |          |          |          |          |          |          |
|---------|----------|------------|------|---------|----------|----------|----------|----------|----------|----------|----------|----------|----------|----------|----------|----------|----------|----------|----------|----------|----------|----------|----------|
| fpHILIC | Positive | 251.0363   | 3.23 | unknown | 9917971  | 6401878  | 4575019  | 6401041  | 4488959  | 7218657  | 3742967  | 3308875  | 5430356  | 3898008  | 3600665  | 5538111  | 5438614  | 4632097  | 4890155  | 7565218  | 5161616  | 6898893  | 4700111  |
| fpHILIC | Positive | 168.0914   | 2.06 | unknown | 2423598  | 1434803  | 1929147  | 1272830  | 1215780  | 1545093  | 1253155  | 1208111  | 1393257  | 1663274  | 1545206  | 1518409  | 1232548  | 1870578  | 1996688  | 1495653  | 1243268  | 1842209  | 1412380  |
| fpHILIC | Positive | 188.0699   | 2.61 | unknown | 53747232 | 68844856 | 55036104 | 35632484 | 47491884 | 65621600 | 61678004 | 37736504 | 41584944 | 45783840 | 62640648 | 59087084 | 52875616 | 72353456 | 85041424 | 61047680 | 50423716 | 52206280 | 58231456 |
| EIC     | Negative | 385.2606   | 3.72 | unknown | 231224   | 103504   | 164297   | 98412    | 91074    | 103798   | 111686   | 194527   | 89724    | 129076   | 124279   | 88290    | 87689    | 502433   | 152986   | 36341    | 183413   | 230419   | 110701   |
| EIC     | Negative | 405.2532   | 5.21 | unknown | 235474   | 192444   | 247315   | 187317   | 158949   | 171309   | 191281   | 218687   | 144176   | 202601   | 214001   | 198236   | 203714   | 184970   | 234748   | 224636   | 197180   | 214476   | 197578   |
| EIC     | Negative | 493.3544   | 3.74 | unknown | 177297   | 232009   | 144180   | 127810   | 161242   | 231200   | 153548   | 152795   | 125514   | 152609   | 320572   | 167077   | 197209   | 216644   | 242069   | 215847   | 204209   | 128893   | 204988   |
| EIC     | Negative | 373.2374   | 6.09 | unknown | 367806   | 405578   | 327847   | 277433   | 377102   | 324504   | 319357   | 343897   | 267417   | 277599   | 352342   | 274966   | 353774   | 289453   | 377850   | 367210   | 398095   | 406761   | 423252   |
| fpHILIC | Negative | 287.0521   | 2.94 | unknown | 1820334  | 905848   | 866540   | 1168827  | 792903   | 1489359  | 743203   | 747893   | 1013147  | 967785   | 725456   | 1321716  | 1079896  | 1191455  | 1186861  | 940312   | 1360876  | 1181680  | 1118406  |
| EIC     | Negative | 323.2587   | 4.92 | unknown | 149730   | 74686    | 225375   | 267319   | 84462    | 113969   | 78177    | 182670   | 175634   | 1811704  | 70940    | 150428   | 190989   | 60723    | 86455    | 235598   | 149970   | 176804   | 119080   |
| EIC     | Negative | 556.2656   | 3.99 | unknown | 272371   | 340598   | 312595   | 167287   | 219644   | 347627   | 182892   | 238144   | 74063    | 168197   | 269471   | 169956   | 155516   | 469593   | 278048   | 97470    | 241376   | 278195   | 389890   |
| fpHILIC | Positive | 118.0651   | 2.06 | unknown | 1710203  | 911938   | 1439428  | 875743   | 746705   | 1021297  | 845392   | 796535   | 872679   | 1086579  | 952397   | 1067100  | 768843   | 1280365  | 1395840  | 943647   | 787742   | 1172256  | 880678   |
| EIC     | Negative | 343.2123   | 3.53 | unknown | 390946   | 346829   | 317799   | 252362   | 165119   | 358025   | 285001   | 259504   | 343168   | 211417   | 270350   | 374979   | 341003   | 378341   | 359605   | 312577   | 228038   | 386589   | 420226   |
| EIC     | Negative | 329.1762   | 2.18 | unknown | 8490063  | 7498679  | 9579260  | 8632289  | 3210235  | 9817426  | 8140541  | 5063969  | 7598570  | 8128563  | 5506637  | 11906276 | 9777581  | 6245439  | 3462465  | 9037196  | 6944857  | 13866268 | 8282892  |
| EIC     | Negative | 383.2442   | 3.27 | unknown | 92775    | 46025    | 94022    | 41371    | 33902    | 51419    | 34014    | 71045    | 29680    | 63709    | 42444    | 33571    | 36815    | 126981   | 48152    | 34427    | 49567    | 98901    | 35323    |
| EIC     | Negative | 498.2527   | 0.99 | unknown | 187585   | 147585   | 167294   | 0        | 120945   | 0        | 191576   | 107594   | 156312   | 128453   | 0        | 119313   | 103718   | 158251   | 0        | 120267   | 103646   | 126584   |          |
| fpHILIC | Positive | 130.0647   | 2.61 | unknown | 844168   | 1041102  | 987926   | 577431   | 720532   | 967717   | 830213   | 637132   | 702796   | 753908   | 908407   | 872223   | 816108   | 1077316  | 1194279  | 919255   | 769424   | 753536   | 1038323  |
| fpHILIC | Negative | 190.0541   | 0.86 | unknown | 11391603 | 7726395  | 7186241  | 7435453  | 4946636  | 7914984  | 5814306  | 6495255  | 4847815  | 8129984  | 9403721  | 8864499  | 6573986  | 10310047 | 12408937 | 0        | 62389624 | 9806524  | 8818914  |
| EIC     | Negative | 475.2851   | 3.40 | unknown | 2234329  | 957869   | 2124579  | 5886702  | 1290885  | 2200780  | 2325319  | 3687797  | 1973061  | 1575036  | 2324527  | 2341515  | 3226011  | 336012   | 1036336  | 1493510  | 3173224  | 7464278  | 742350   |
| EIC     | Negative | 503.2020   | 4.00 | unknown | 1941306  | 1188164  | 1546717  | 3391041  | 1060402  | 1654700  | 1942769  | 2085207  | 1508317  | 3040947  | 1870145  | 1976784  | 2265006  | 485770   | 1191629  | 1664067  | 2370051  | 4033322  | 748040   |
| EIC     | Negative | 476.2887   | 3.40 | unknown | 567806   | 262917   | 562336   | 1698610  | 385394   | 602987   | 632229   | 977817   | 547642   | 1555391  | 614000   | 647841   | 974613   | 96184    | 306245   | 440923   | 852975   | 2018379  | 198452   |
| EIC     | Negative | 445.2960   | 3.15 | unknown | 735365   | 145129   | 740152   | 810057   | 139214   | 202573   | 152043   | 509732   | 172289   | 792980   | 139046   | 179679   | 167399   | 132652   | 146277   | 151117   | 159347   | 836362   | 133954   |
| EIC     | Negative | 548.3014   | 2.34 | unknown | 988250   | 266371   | 1556318  | 487455   | 184516   | 245681   | 225400   | 755534   | 84817    | 845267   | 296587   | 262892   | 147391   | 455865   | 295373   | 459660   | 175479   | 790120   | 410611   |
| EIC     | Negative | 390.0345   | 0.48 | unknown | 158395   | 160836   | 127203   | 213252   | 177564   | 150788   | 133535   | 168182   | 138054   | 206032   | 178993   | 180352   | 205883   | 66855    | 184756   | 226501   | 173064   | 189889   | 158920   |
| EIC     | Negative | 428.1827   | 2.67 | unknown | 203010   | 182966   | 237366   | 169416   | 87358    | 118502   | 194299   | 116553   | 142729   | 736127   | 139746   | 229564   | 206825   | 167479   | 155273   | 171679   | 164553   | 176789   | 131187   |
| fpHILIC | Positive | 503.3145   | 0.37 | unknown | 953042   | 441236   | 912515   | 2943862  | 594169   | 854423   | 1132963  | 1275550  | 1025920  | 2231121  | 1064857  | 1008864  | 1489950  | 130544   | 461308   | 831210   | 1280217  | 2984203  | 375284   |
| EIC     | Negative | 618.3421   | 3.52 | unknown | 1890765  | 1303780  | 1236456  | 1124732  | 1039922  | 1867475  | 1297177  | 1268602  | 1188188  | 1379807  | 1227231  | 1998010  | 1329784  | 778382   | 1347821  | 1726234  | 1983374  | 852560   | 2185086  |
| EIC     | Negative | 582.3779   | 5.40 | unknown | 11009165 | 11319746 | 11281464 | 10569416 | 11388373 | 12785521 | 0        | 11695239 | 10868501 | 9745265  | 11743905 | 11938786 | 11650252 | 11132011 | 11495170 | 10628412 | 11802729 | 10672930 | 12201275 |
| EIC     | Negative | 299.2235   | 5.09 | unknown | 1223000  | 1244859  | 1178314  | 1418097  | 812817   | 754180   | 852089   | 977895   | 826597   | 804726   | 938481   | 1212749  | 1082105  | 1105545  | 1244120  | 1077962  | 1011397  | 953880   | 842468   |
| EIC     | Negative | 621.4015   | 5.65 | unknown | 0        | 0        | 393952   | 0        | 23353    | 36144    | 105537   | 32188    | 0        | 0        | 0        | 0        | 23377    | 0        | 239739   | 0        | 0        | 0        | 0        |
| fpHILIC | Negative | 263.4022   | 2.61 | unknown | 405082   | 515092   | 508861   | 304627   | 343100   | 282838   | 456461   | 195921   | 186291   | 307476   | 528950   | 281232   | 416028   | 328774   | 623462   | 277987   | 285059   | 271247   | 322964   |
| EIC     | Negative | 314.2056   | 2.66 | unknown | 80068    | 74007    | 91264    | 0        | 55590    | 102511   | 39061    | 63944    | 35951    | 91339    | 48533    | 92288    | 49809    | 58884    | 69466    | 37771    | 60036    | 108379   | 85668    |
| EIC     | Negative | 349.2389   | 3.57 | unknown | 84034    | 47794    | 79518    | 97324    | 18900    | 25356    | 17322    | 20644    | 18975    | 58332    | 24354    | 29783    | 19345    | 25913    | 15675    | 24069    | 25561    | 39521    | 18321    |
| fpHILIC | Positive | 189.1343   | 4.87 | unknown | 893557   | 655075   | 372894   | 502903   | 410424   | 457623   | 357224   | 345428   | 813191   | 587303   | 456936   | 508517   | 413444   | 605114   | 933607   | 709506   | 434853   | 318792   | 507861   |
| EIC     | Negative | 412.3436   | 6.03 | unknown | 1286790  | 543081   | 561981   | 981757   | 608815   | 430537   | 995773   | 496296   | 631723   | 456956   | 587227   | 412451   | 490310   | 453132   | 593711   | 775407   | 453563   | 443203   | 1590186  |
| EIC     | Negative | 333.2075   | 4.12 | unknown | 475737   | 124048   | 621934   | 364323   | 205117   | 207138   | 198967   | 353237   | 219991   | 563685   | 219991   | 221238   | 197670   | 243003   | 207595   | 197630   | 234403   | 444627   | 244297   |
| EIC     | Negative | 608.6791   | 0.52 | unknown | 597556   | 438567   | 807916   | 882699   | 363981   | 436002   | 528660   | 228596   | 558563   | 680054   | 393587   | 493669   | 516934   | 49481    | 418831   | 497431   | 404583   | 673241   | 845570   |
| EIC     | Negative | 616.5513   | 0.64 | unknown | 69744    | 36188    | 113872   | 81648    | 40449    | 37967    | 47396    | 36047    | 21855    | 66434    | 37667    | 38621    | 46446    | 0        | 30359    | 51535    | 33066    | 60362    | 84634    |
| EIC     | Negative | 319.2278   | 5.99 | unknown | 242401   | 163957   | 536799   | 222382   | 128585   | 144160   | 150159   | 249769   | 70607    | 281857   | 194362   | 202355   | 140767   | 226095   | 124545   | 116180   | 169999   | 293221   | 202821   |
| EIC     | Negative | 611.4305   | 4.14 | unknown | 179992   | 140215   | 399196   | 461666   | 119819   | 88207    | 151050   | 196671   | 176215   | 182867   | 110849   | 170948   | 150193   | 193614   | 137067   | 140643   | 188813   | 256245   | 170331   |
| fpHILIC | Positive | 190.0862   | 2.06 | unknown | 1410368  | 738153   | 1219365  | 781055   | 748487   | 733193   | 714273   | 660563   | 653814   | 1086590  | 848511   | 775213   | 683530   | 1110752  | 1088764  | 764092   | 627183   | 1014198  | 789656   |
| EIC     | Negative | 290.2942   | 6.39 | unknown | 23490398 | 8814691  | 16698076 | 11612293 | 6997074  | 12300406 | 0        | 7805044  | 0        | 13674160 | 10925420 | 10025642 | 0        | 15514145 | 12851578 | 4906484  | 9470733  | 0        | 5873667  |
| EIC     | Negative | 289.1448   | 1.81 | unknown | 395502   | 239851   | 473349   | 0        | 82498    | 189305   | 237336   | 99226    | 176654   | 139540   | 218216   | 324816   | 292208   | 200525   | 222642   | 288962   | 203189   | 0        | 244637   |
| EIC     | Negative | 425.2195   | 2.22 | unknown | 305314   | 96015    | 217565   | 280044   | 85409    | 148984   | 109300   | 266897   | 26724    | 248451   | 64538    | 127133   | 81002    | 78114    | 121843   | 69804    | 148750   | 295615   | 143024   |
| fpHILIC | Negative | 292.2325   | 4.07 | unknown | 1372972  | 447480   | 163502   | 3088254  | 424568   | 749033   | 377705   | 92802    | 173246   | 684395   | 830801   | 2219060  | 695366   | 157474   | 115090   | 1629616  | 767127   | 736216   | 315795   |
| EIC     | Negative | 401.1570   | 4.23 | unknown | 233649   | 165948   | 237302   | 287371   | 156086   | 172271   | 146251   | 174214   | 77469    | 221120   | 129541   | 131210   | 127293   | 103736   | 184256   | 226363   | 123232   | 249285   | 101072   |
| fpHILIC | Negative | 215.0671   | 2.63 | unknown | 1660693  | 277019   | 181486   | 281322   | 332401   | 790836   | 1166506  | 259509   | 586712   | 176527   | 236377   | 602705   | 443213   | 557636   | 227629   | 650235   | 505348   | 747478   | 421629   |
| EIC     | Negative | 280.1888   | 3.65 | unknown | 1092191  | 1183023  | 938855   | 1087079  | 1091070  | 921353   | 907777   | 1060071  | 805815   | 992156   | 1111710  | 1021105  | 1204532  | 936808   | 1160590  | 1031320  | 1058526  | 1326242  | 1280158  |
| fpHILIC | Positive | 70.0657    | 2.79 | unknown | 13522982 | 12863025 | 11985989 | 8782025  | 9822269  | 12188199 | 8762266  | 9130400  | 4843968  | 9708024  | 10562862 | 10770667 | 8939799  | 12768138 | 15892755 | 9860055  | 9638961  | 11407807 | 12373809 |
| fpHILIC | Negative | 132.0302</ |      |         |          |          |          |          |          |          |          |          |          |          |          |          |          |          |          |          |          |          |          |

|         |          |          |      |         |          |          |          |          |          |          |          |          |          |          |          |          |          |          |          |          |          |          |          |   |
|---------|----------|----------|------|---------|----------|----------|----------|----------|----------|----------|----------|----------|----------|----------|----------|----------|----------|----------|----------|----------|----------|----------|----------|---|
| EIC     | Negative | 411.1846 | 3.76 | unknown | 1229231  | 714690   | 1498377  | 840668   | 438141   | 606560   | 835148   | 662881   | 599479   | 594079   | 582176   | 877973   | 1009429  | 703116   | 538735   | 922051   | 789033   | 1157909  | 484065   |   |
| EIC     | Negative | 366.2492 | 6.43 | unknown | 445787   | 0        | 0        | 393703   | 3533099  | 0        | 0        | 0        | 2831033  | 0        | 0        | 2947288  | 3072767  | 2928843  | 2261603  | 2728921  | 0        | 0        | 2892896  | 0 |
| EIC     | Negative | 348.8067 | 0.52 | unknown | 736386   | 343875   | 809424   | 582840   | 438675   | 494401   | 345627   | 293664   | 539613   | 986763   | 332559   | 382311   | 431406   | 183858   | 388039   | 551398   | 421550   | 414890   | 840559   |   |
| fpHILIC | Positive | 74.0607  | 3.18 | unknown | 4881388  | 6608911  | 4335106  | 3545065  | 4247158  | 6258499  | 4904559  | 3293108  | 4295677  | 3717385  | 6005735  | 6036134  | 6295798  | 6340630  | 7462750  | 5760403  | 5000292  | 4272037  | 5984306  |   |
| EIC     | Negative | 142.1859 | 3.76 | unknown | 346337   | 178556   | 406320   | 216474   | 310500   | 167854   | 235813   | 194871   | 143953   | 167191   | 150532   | 242191   | 273833   | 205414   | 146600   | 255557   | 217810   | 331154   | 124944   |   |
| EIC     | Negative | 257.2124 | 6.09 | unknown | 766069   | 466230   | 750843   | 684475   | 256928   | 332257   | 378187   | 447806   | 251949   | 379017   | 310722   | 473257   | 553588   | 353673   | 505618   | 401698   | 404332   | 488387   | 270723   |   |
| EIC     | Negative | 366.2502 | 6.39 | unknown | 3261268  | 1440407  | 3986759  | 3111232  | 1042797  | 2115541  | 0        | 2538655  | 0        | 2681061  | 1933144  | 1787969  | 718847   | 2252777  | 2015104  | 1190056  | 1867400  | 977997   | 1019893  |   |
| EIC     | Negative | 390.2944 | 6.44 | unknown | 2987253  | 685338   | 7556979  | 10608422 | 398202   | 370983   | 8726439  | 13732025 | 497201   | 344110   | 6926441  | 0        | 0        | 10125748 | 9267149  | 0        | 7824571  | 0        | 12353582 |   |
| fpHILIC | Negative | 261.0416 | 2.61 | unknown | 1305480  | 1636488  | 1239462  | 855076   | 1136277  | 1197466  | 1429393  | 912613   | 929625   | 1101360  | 1387404  | 1431310  | 1220709  | 1617496  | 1834153  | 1151600  | 1184452  | 1324368  | 1463215  |   |
| EIC     | Negative | 271.1919 | 3.81 | unknown | 776051   | 650187   | 869149   | 986542   | 447720   | 462076   | 485336   | 684656   | 398092   | 801996   | 506424   | 643676   | 639206   | 569342   | 707673   | 618550   | 493895   | 791173   | 466283   |   |
| EIC     | Negative | 464.2785 | 4.67 | unknown | 107628   | 179357   | 167764   | 110108   | 135968   | 195330   | 158230   | 136512   | 41770    | 109167   | 142289   | 176737   | 119548   | 252639   | 216413   | 125562   | 190506   | 108108   | 188954   |   |
| fpHILIC | Negative | 165.0751 | 2.06 | unknown | 8470731  | 4667219  | 5913404  | 3694527  | 3405368  | 5037692  | 3786232  | 3375125  | 4361287  | 4966282  | 4046909  | 4584747  | 3944481  | 5682982  | 6605959  | 4247598  | 3663485  | 5458199  | 4827150  |   |
| fpHILIC | Positive | 352.1695 | 2.70 | unknown | 1182244  | 1107992  | 1080662  | 1218451  | 1223265  | 1554136  | 1189598  | 513757   | 534354   | 882671   | 680206   | 1083117  | 691964   | 1066104  | 1562526  | 639585   | 739749   | 786960   | 2560649  |   |
| EIC     | Negative | 378.1743 | 3.31 | unknown | 819273   | 190969   | 1559600  | 613997   | 64941    | 262390   | 114274   | 785151   | 37071    | 853624   | 206595   | 270083   | 218577   | 505922   | 139389   | 65791    | 302263   | 530123   | 533890   |   |
| EIC     | Negative | 457.3663 | 4.94 | unknown | 364743   | 89518    | 145452   | 135316   | 249283   | 97878    | 160919   | 100639   | 131277   | 112203   | 126687   | 82941    | 121472   | 117379   | 82925    | 113232   | 436997   | 193070   | 93907    |   |
| EIC     | Negative | 344.9032 | 0.56 | unknown | 618876   | 75777    | 231532   | 255197   | 101066   | 292747   | 102579   | 25677    | 106084   | 356126   | 106084   | 90610    | 100277   | 96552    | 112528   | 178795   | 59066    | 113377   | 331160   |   |
| fpHILIC | Negative | 447.3481 | 0.37 | unknown | 1092529  | 716867   | 772877   | 783196   | 704914   | 660503   | 929176   | 691501   | 564215   | 712871   | 938333   | 673437   | 682205   | 733246   | 1084547  | 1237042  | 618852   | 713120   | 761774   |   |
| EIC     | Negative | 291.1603 | 1.64 | unknown | 932715   | 485677   | 906104   | 199191   | 190676   | 506676   | 542680   | 286408   | 400050   | 616513   | 428454   | 731437   | 618817   | 383062   | 259796   | 529432   | 379304   | 711933   | 515462   |   |
| EIC     | Negative | 504.3064 | 4.00 | unknown | 357755   | 186046   | 100328   | 643036   | 200907   | 321062   | 81127    | 457273   | 317930   | 538153   | 392138   | 406157   | 460931   | 11882    | 0        | 353336   | 447073   | 811490   | 102798   |   |
| EIC     | Negative | 300.2261 | 5.09 | unknown | 245434   | 268202   | 197356   | 258959   | 167163   | 140579   | 156193   | 188355   | 169245   | 159135   | 200641   | 249784   | 196027   | 239809   | 237060   | 163899   | 191662   | 189672   | 0        |   |
| fpHILIC | Negative | 240.1600 | 0.40 | unknown | 1219301  | 587181   | 243150   | 3714052  | 418053   | 1652721  | 439272   | 492357   | 113041   | 711944   | 602356   | 915297   | 793364   | 0        | 665390   | 860161   | 1175654  | 901259   | 274556   |   |
| EIC     | Negative | 285.2075 | 5.00 | unknown | 401640   | 363618   | 355124   | 258290   | 307986   | 298660   | 374936   | 289660   | 267651   | 339144   | 307499   | 299550   | 331948   | 248624   | 371349   | 367151   | 381408   | 478187   | 408984   |   |
| fpHILIC | Positive | 219.0971 | 3.60 | unknown | 2883774  | 3130248  | 1728629  | 1730198  | 2293610  | 3277131  | 2108687  | 1319767  | 2188662  | 2402636  | 2711357  | 2256554  | 2695405  | 2662600  | 4091315  | 2126245  | 2495724  | 1573817  | 3646090  |   |
| fpHILIC | Negative | 251.0176 | 3.23 | unknown | 957695   | 590648   | 373640   | 547792   | 355653   | 634403   | 341527   | 323048   | 438426   | 412367   | 289663   | 542008   | 503545   | 371612   | 517339   | 623516   | 456997   | 580993   | 427415   |   |
| fpHILIC | Positive | 208.1162 | 2.07 | unknown | 569984   | 313842   | 262998   | 305852   | 301644   | 283774   | 246230   | 316088   | 264058   | 351947   | 300057   | 288689   | 244532   | 346767   | 388025   | 311303   | 205711   | 506846   | 347535   |   |
| EIC     | Negative | 518.2965 | 2.91 | unknown | 348908   | 193643   | 399878   | 1070146  | 236353   | 231917   | 330259   | 487596   | 262050   | 339144   | 364759   | 388684   | 458435   | 0        | 338293   | 329978   | 421422   | 582233   | 49421    |   |
| EIC     | Negative | 368.1480 | 0.71 | unknown | 266628   | 236579   | 315039   | 140439   | 154071   | 203301   | 170736   | 217827   | 115768   | 226527   | 207160   | 168192   | 129615   | 262358   | 261389   | 132031   | 174391   | 237446   | 269408   |   |
| EIC     | Negative | 365.3810 | 6.16 | unknown | 689837   | 408722   | 742824   | 567134   | 484492   | 285237   | 557779   | 587776   | 387403   | 634814   | 528999   | 538018   | 412042   | 610981   | 612738   | 678680   | 428476   | 651495   | 456233   |   |
| fpHILIC | Positive | 189.0730 | 2.61 | unknown | 6575481  | 7946746  | 6285214  | 4140833  | 5193336  | 7081296  | 7346361  | 4447943  | 4987314  | 5172600  | 6981593  | 6941935  | 6332786  | 8424554  | 9662155  | 7272630  | 5866294  | 6635428  | 684285   |   |
| fpHILIC | Positive | 103.0544 | 2.06 | unknown | 4075781  | 2123376  | 3142789  | 1948592  | 1706153  | 2127311  | 1866044  | 1771297  | 2199047  | 2525656  | 2068407  | 2306576  | 1823962  | 3020556  | 3413596  | 2308323  | 1764220  | 2683601  | 2098880  |   |
| EIC     | Negative | 233.1545 | 3.87 | unknown | 838169   | 1920389  | 1127489  | 989823   | 1712542  | 859455   | 1893909  | 915267   | 1541950  | 867675   | 1466999  | 1340859  | 1974428  | 1625780  | 1412611  | 1872696  | 1439702  | 1603354  | 2269681  |   |
| fpHILIC | Positive | 131.0491 | 2.06 | unknown | 1530703  | 819158   | 1396489  | 811861   | 608086   | 773817   | 672173   | 750730   | 753408   | 1016064  | 840435   | 871500   | 661777   | 1286324  | 1161989  | 802680   | 626614   | 1117491  | 827656   |   |
| EIC     | Negative | 582.3779 | 5.17 | unknown | 5169292  | 6651469  | 5602451  | 4926176  | 6086826  | 7503235  | 0        | 5726749  | 5159622  | 4597187  | 6516755  | 6808780  | 6200480  | 6459735  | 6601338  | 5918099  | 6247950  | 4966005  | 6303279  |   |
| fpHILIC | Positive | 157.0604 | 2.58 | unknown | 2108202  | 2253376  | 1851823  | 2136919  | 1382911  | 3766544  | 1671809  | 1406901  | 1040623  | 2097477  | 2694796  | 2821563  | 2459981  | 2741512  | 2358989  | 1930644  | 2346142  | 1740341  | 3209434  |   |
| fpHILIC | Positive | 206.1001 | 2.61 | unknown | 19316124 | 25797492 | 20392010 | 12618395 | 17708398 | 21732432 | 21386632 | 13348977 | 14852347 | 16655352 | 22539092 | 13185334 | 18404618 | 26058946 | 29907802 | 21925998 | 18502970 | 20665206 | 20953612 |   |
| EIC     | Negative | 340.2568 | 5.50 | unknown | 231517   | 129458   | 338482   | 289332   | 144287   | 133365   | 150953   | 217432   | 130981   | 223032   | 148498   | 177993   | 182865   | 162952   | 135701   | 143882   | 189156   | 372952   | 130379   |   |
| fpHILIC | Positive | 146.0596 | 2.61 | unknown | 1932966  | 2387415  | 1853998  | 1083467  | 1557373  | 2349464  | 2021740  | 1146909  | 1246645  | 2253061  | 1800000  | 1676548  | 2378795  | 2755492  | 1322659  | 1620841  | 1664827  | 2030817  | 0        |   |
| EIC     | Negative | 408.7626 | 0.52 | unknown | 871325   | 490483   | 867340   | 622049   | 429023   | 483677   | 525775   | 284639   | 598681   | 1125768  | 436546   | 490647   | 646234   | 151063   | 343434   | 53676    | 427884   | 635916   | 963642   |   |
| EIC     | Negative | 255.1067 | 0.46 | unknown | 201678   | 191989   | 61508    | 720451   | 115074   | 139098   | 98597    | 80766    | 81004    | 132247   | 111539   | 121758   | 128729   | 222745   | 80736    | 167931   | 71005    | 98309    | 100379   |   |
| fpHILIC | Positive | 161.0916 | 3.18 | unknown | 776395   | 1019787  | 702180   | 679355   | 626590   | 865816   | 820232   | 478194   | 738644   | 613986   | 1039113  | 1108033  | 1152551  | 1061744  | 962290   | 936503   | 913798   | 643188   | 966127   |   |
| EIC     | Negative | 584.6361 | 0.52 | unknown | 656221   | 337182   | 1041375  | 761712   | 395358   | 443665   | 344977   | 0        | 666242   | 958158   | 289307   | 252111   | 418898   | 0        | 275660   | 573055   | 171904   | 508436   | 783807   |   |
| fpHILIC | Positive | 252.1071 | 3.17 | unknown | 1793534  | 1929164  | 1377179  | 1219787  | 1067647  | 1226119  | 1519944  | 751863   | 921195   | 1553123  | 1387027  | 1041588  | 1585237  | 870760   | 1780116  | 1253943  | 1331530  | 1319373  | 1191991  |   |
| fpHILIC | Positive | 86.0969  | 2.40 | unknown | 16473507 | 15210351 | 13797540 | 9331021  | 12432841 | 19638938 | 14757697 | 7148772  | 13114822 | 13102543 | 15589304 | 15657600 | 14624502 | 18255806 | 29607108 | 17279738 | 11347014 | 10611682 | 15817623 |   |
| fpHILIC | Positive | 72.0814  | 2.71 | unknown | 16138675 | 18541480 | 17309728 | 12862034 | 14191101 | 19367876 | 15962148 | 11975274 | 12764700 | 14820449 | 19485528 | 19889494 | 17729670 | 24586230 | 28374696 | 16738744 | 14354030 | 13856609 | 19843867 |   |
| EIC     | Negative | 511.2706 | 2.08 | unknown | 19714873 | 8248542  | 15302173 | 3409371  | 3235455  | 4079895  | 5604198  | 2642314  | 3022586  | 8868461  | 6019005  | 515551   | 3021245  | 5410636  | 5148176  | 10688014 | 1413392  | 2379039  | 3693879  |   |
| fpHILIC | Negative | 166.0770 | 2.06 | unknown | 551917   | 254335   | 300419   | 199057   | 183210   | 260133   | 222829   | 183275   | 320413   | 262840   | 211797   | 243134   | 172341   | 306899   | 336919   | 218770   | 222851   | 316351   | 261302   |   |
| fpHILIC | Negative | 353.0898 | 3.20 | unknown | 528760   | 492098   | 411408   | 718157   | 421839   | 687867   | 563515   | 362761   | 529893   | 447334   | 540036   | 507708   | 552218   | 982132   | 624570   | 811390   | 534639   | 616127   | 632727   |   |
| fpHILIC | Positive | 377.1735 | 2.06 | unknown | 1490349  | 728164   | 0        | 8077     |          |          |          |          |          |          |          |          |          |          |          |          |          |          |          |   |

|         |          |          |      |         |          |          |          |          |          |          |          |          |          |          |          |          |          |          |          |          |          |          |          |
|---------|----------|----------|------|---------|----------|----------|----------|----------|----------|----------|----------|----------|----------|----------|----------|----------|----------|----------|----------|----------|----------|----------|----------|
| EIC     | Negative | 299.1879 | 2.81 | unknown | 124913   | 123463   | 126507   | 109080   | 89023    | 144580   | 124651   | 89695    | 96349    | 215214   | 131911   | 209985   | 224205   | 128844   | 140877   | 130788   | 157431   | 146532   | 113767   |
| fpHILIC | Positive | 118.0742 | 2.78 | unknown | 3392169  | 3399640  | 3169609  | 2213202  | 2404110  | 2906126  | 2248364  | 2182342  | 2425086  | 2710949  | 2627613  | 2525499  | 2389927  | 3448961  | 4214834  | 2367504  | 2359293  | 2902908  | 3590663  |
| EIC     | Negative | 257.1759 | 2.16 | unknown | 335225   | 152741   | 199052   | 129295   | 129295   | 124218   | 171084   | 121379   | 282784   | 194095   | 124218   | 226849   | 154436   | 303145   | 176023   | 139930   | 162726   | 233162   | 226387   |
| fpHILIC | Positive | 117.0670 | 2.79 | unknown | 3269522  | 2988318  | 2783624  | 2121545  | 2230126  | 2889536  | 1919521  | 2004023  | 2042665  | 2418545  | 2355210  | 2623436  | 2037477  | 3163464  | 4121928  | 2350579  | 2095154  | 2576497  | 2912425  |
| EIC     | Negative | 507.3690 | 4.41 | unknown | 673269   | 457968   | 615157   | 575854   | 499363   | 288255   | 587298   | 4042665  | 743596   | 606694   | 504398   | 455623   | 328988   | 548602   | 631583   | 479587   | 664822   | 438766   |          |
| EIC     | Negative | 493.3542 | 4.09 | unknown | 292231   | 532615   | 330339   | 183245   | 433834   | 236848   | 424453   | 253873   | 393488   | 238465   | 384847   | 306242   | 336096   | 391748   | 617728   | 511118   | 325574   | 257749   | 498922   |
| EIC     | Negative | 318.2156 | 3.91 | unknown | 1001243  | 428225   | 1665968  | 782927   | 306893   | 252621   | 751704   | 619100   | 690024   | 670208   | 543823   | 747732   | 900640   | 491345   | 249235   | 598966   | 620683   | 943694   | 368988   |
| EIC     | Negative | 618.3422 | 3.06 | unknown | 2451730  | 1696941  | 1536868  | 1433407  | 1151620  | 2576785  | 1571488  | 1713918  | 1724993  | 1883242  | 1579142  | 2822560  | 1768574  | 1001763  | 1811306  | 2531449  | 2826448  | 1166977  | 2760587  |
| fpHILIC | Positive | 190.0763 | 2.61 | unknown | 436386   | 648974   | 448911   | 283471   | 411989   | 479261   | 499368   | 279591   | 321553   | 477542   | 478391   | 498555   | 532193   | 774751   | 485050   | 390266   | 419499   | 496603   |          |
| fpHILIC | Negative | 249.0217 | 3.23 | unknown | 10785753 | 6503601  | 4461743  | 6774648  | 4204925  | 7509266  | 4043331  | 3531277  | 5453608  | 4432945  | 3473234  | 5776985  | 5795756  | 4506027  | 5238161  | 8079462  | 5442288  | 7487202  | 5190281  |
| EIC     | Negative | 624.3313 | 3.94 | unknown | 2073473  | 7872412  | 1652445  | 2958694  | 4172769  | 4477691  | 4044116  | 1944429  | 4374541  | 3159605  | 7721329  | 5093304  | 6018205  | 5167570  | 5243912  | 5107033  | 5300222  | 2194394  | 6315381  |
| EIC     | Negative | 594.3423 | 2.53 | unknown | 321854   | 270950   | 351960   | 197891   | 269090   | 335263   | 326472   | 181607   | 299684   | 269988   | 354509   | 332331   | 228002   | 312212   | 323876   | 382845   | 349020   | 213461   | 527532   |
| fpHILIC | Positive | 159.1124 | 2.70 | unknown | 1886595  | 2282745  | 1985220  | 1525349  | 1957689  | 2024771  | 1975769  | 1580511  | 1559859  | 1917389  | 2867630  | 2315197  | 2180300  | 3178881  | 2968436  | 2180522  | 1986580  | 1786903  | 2657154  |
| EIC     | Negative | 296.1873 | 3.28 | unknown | 183286   | 23226    | 87114    | 124987   | 39738    | 108501   | 20201    | 86102    | 17161    | 95396    | 63201    | 87683    | 55468    | 33606    | 85811    | 41088    | 69237    | 96644    | 53085    |
| EIC     | Negative | 628.3727 | 3.94 | unknown | 754447   | 468227   | 2109291  | 469485   | 185025   | 1573654  | 559326   | 404371   | 243587   | 210969   | 663332   | 1323234  | 2227260  | 902985   | 146709   | 916786   | 873093   | 1461527  | 378673   |
| EIC     | Negative | 383.1827 | 3.87 | unknown | 161711   | 63440    | 211023   | 303511   | 81844    | 147691   | 285451   | 1748626  |          | 210969   | 125048   | 166501   | 148758   | 146488   | 112298   | 126617   | 134459   | 524533   | 130980   |
| EIC     | Negative | 411.1846 | 2.91 | unknown | 5736494  | 5467617  | 5551879  | 3745877  | 3461044  | 5249789  | 3563609  | 3976291  | 6018114  | 5612840  | 6020397  | 5598664  | 5363574  | 4945273  | 5614477  | 5669039  | 4909981  | 4335652  |          |
| EIC     | Negative | 333.2075 | 3.80 | unknown | 2340001  | 1093963  | 2714023  | 2097720  | 995188   | 1161449  | 1281192  | 1639378  | 2080560  | 1185981  | 1453173  | 1715988  | 1141985  | 1150570  | 1360304  | 1437830  | 2600129  | 1415354  |          |
| fpHILIC | Positive | 207.1028 | 2.61 | unknown | 1422974  | 1797505  | 1456682  | 858629   | 1197167  | 1449839  | 1744150  | 951512   | 978209   | 1250857  | 1572449  | 1546883  | 1331247  | 1820655  | 2316489  | 1598206  | 1180703  | 1344080  | 1611699  |
| fpHILIC | Positive | 509.2871 | 0.37 | unknown | 1092154  | 1083482  | 901834   | 770649   | 1039358  | 469086   | 854303   | 882900   | 406114   | 713190   | 9304376  | 806978   | 705357   | 1072331  | 1003270  | 398068   | 1050037  | 1188531  | 1015700  |
| EIC     | Negative | 346.9010 | 0.56 | unknown | 579033   | 76005    | 169173   | 247163   | 104031   | 296150   | 71960    | 11913    | 83841    | 318944   | 75827    | 69650    | 85461    | 67853    | 101716   | 154673   | 38800    | 123037   | 305800   |
| EIC     | Negative | 507.2727 | 5.84 | unknown | 25837857 | 25124210 | 21815747 | 18856338 | 20199813 | 11106348 | 17454791 | 21680803 | 8593398  | 16355489 | 18367100 | 16243942 | 15282856 | 25922884 | 23421761 | 9580070  | 19614475 | 29332307 | 18815663 |
| EIC     | Negative | 312.2264 | 4.35 | unknown | 2847522  | 809498   | 3501335  | 3712247  | 1307874  | 949387   | 1255450  | 3117793  | 1085878  | 4764946  | 970166   | 1215443  | 1182803  | 1581634  | 1602017  | 825215   | 1295151  | 1949166  | 1178164  |
| fpHILIC | Positive | 198.0865 | 2.36 | unknown | 3209424  | 2657987  | 2856004  | 2619971  | 1972818  | 2988556  | 1734257  | 1964640  | 1762055  | 2626629  | 3114727  | 2256342  | 2597913  | 4306440  | 2474117  | 2757069  | 2770563  | 1906368  | 3393106  |
| fpHILIC | Positive | 171.0953 | 2.83 | unknown | 1829455  | 1630978  | 1150643  | 1119234  | 1295770  | 1489236  | 1069716  | 922136   | 1864036  | 1130135  | 1243318  | 1233358  | 1354996  | 1559490  | 2388291  | 1882299  | 1503750  | 1287498  | 1413881  |
| fpHILIC | Negative | 168.0277 | 3.66 | unknown | 459463   | 406143   | 369984   | 431205   | 354665   | 456356   | 327989   | 396385   | 369078   | 485992   | 391334   | 479372   | 385214   | 429294   | 447251   | 519556   | 534687   | 523254   | 406220   |
| EIC     | Negative | 508.2763 | 5.84 | unknown | 7034995  | 6822871  | 5886169  | 5042392  | 5469493  | 3016441  | 4698799  | 5963383  | 2346119  | 4383629  | 4825907  | 4365832  | 4168160  | 7100184  | 6338411  | 2592580  | 5323487  | 7989046  | 5196502  |
| fpHILIC | Positive | 170.0919 | 2.83 | unknown | 24571946 | 23760600 | 14458396 | 15762170 | 17795866 | 20465716 | 16166531 | 11762041 | 24748676 | 15351748 | 16722984 | 17482172 | 19144630 | 20062026 | 32211332 | 27583356 | 19788942 | 17668324 | 18841936 |
| fpHILIC | Positive | 526.3135 | 0.37 | unknown | 640996   | 596896   | 460932   | 431882   | 557753   | 268962   | 484365   | 507226   | 229983   | 378767   | 526147   | 451330   | 433400   | 624760   | 556409   | 266465   | 597712   | 627623   | 561419   |
| EIC     | Negative | 551.2846 | 3.47 | unknown | 1047543  | 633555   | 2340919  | 685092   | 526382   | 410213   | 703262   | 1154013  | 284931   | 1278621  | 715248   | 661337   | 392914   | 474576   | 541747   | 441456   | 493330   | 1845761  | 611299   |
| EIC     | Negative | 394.2321 | 2.90 | unknown | 434235   | 208812   | 468965   | 311994   | 165726   | 100383   | 372380   | 339734   | 262474   | 438874   | 307258   | 410923   | 480671   | 255716   | 230365   | 258190   | 314595   | 469873   | 312716   |
| EIC     | Negative | 365.6963 | 6.19 | unknown | 907816   | 535639   | 1078556  | 731183   | 858655   | 288549   | 675204   | 854992   | 517804   | 1146638  | 642718   | 475097   | 462451   | 602975   | 913276   | 803391   | 581933   | 769945   | 665023   |
| EIC     | Negative | 339.2536 | 5.50 | unknown | 1068242  | 692984   | 1589467  | 1311620  | 693034   | 599949   | 663881   | 1083229  | 516933   | 1800112  | 694713   | 909247   | 779066   | 703395   | 661356   | 610082   | 844911   | 1786559  | 645809   |
| EIC     | Negative | 330.1794 | 2.34 | unknown | 121495   | 65835    | 189856   | 167439   | 36848    | 78240    | 80168    | 75552    | 51814    | 59285    | 55810    | 114869   | 117241   | 64222    | 46529    | 79692    | 63157    | 169016   | 54372    |
| fpHILIC | Positive | 371.1465 | 2.47 | unknown | 706034   | 457227   | 325505   | 331175   | 280061   | 520189   | 246399   | 200116   | 29816    | 309923   | 531106   | 555652   | 328464   | 315947   | 498298   | 380216   | 299692   | 345894   | 425651   |
| fpHILIC | Negative | 112.9373 | 5.36 | unknown | 1189308  | 288615   | 1034115  | 350088   | 421906   | 567950   | 509611   | 136807   | 376468   | 106540   | 232746   | 79672    | 194990   | 184258   | 1466810  | 92425    | 450470   | 291740   |          |
| fpHILIC | Positive | 119.0894 | 2.71 | unknown | 9897502  | 12208442 | 10384224 | 7822908  | 9127781  | 12502308 | 10642647 | 7837961  | 9569269  | 13362746 | 12948661 | 10970619 | 16746202 | 18324240 | 11017250 | 9977321  | 9915728  | 13125149 |          |
| fpHILIC | Positive | 218.0914 | 2.62 | unknown | 682884   | 839556   | 727148   | 516826   | 625878   | 717335   | 709467   | 446570   | 539158   | 611662   | 710037   | 681659   | 606603   | 920187   | 1065634  | 834698   | 625485   | 639179   | 727064   |
| fpHILIC | Negative | 263.0918 | 2.06 | unknown | 1475462  | 337918   | 296698   | 167528   | 223495   | 591989   | 207983   | 174327   | 244056   | 205889   | 413204   | 163567   | 250651   | 232384   | 240186   | 218895   | 659794   | 310799   |          |
| EIC     | Negative | 642.3007 | 5.54 | unknown | 386647   | 307018   | 364424   | 297837   | 313771   | 293788   | 266788   | 333560   | 304494   | 379644   | 337390   | 338589   | 284744   | 378953   | 367068   | 343535   | 375692   | 404822   | 355597   |
| fpHILIC | Positive | 309.1467 | 2.78 | unknown | 847964   | 801881   | 690131   | 543556   | 548961   | 654293   | 476689   | 744624   | 369760   | 349624   | 689760   | 576102   | 723932   | 763355   | 712233   | 613818   | 641142   | 842266   |          |
| EIC     | Negative | 589.2761 | 5.84 | unknown | 1016457  | 966933   | 865948   | 748033   | 831908   | 440863   | 668856   | 333240   | 662205   | 699408   | 612735   | 653569   | 1044842  | 923836   | 369497   | 816613   | 1611798  | 762710   |          |
| fpHILIC | Negative | 509.2879 | 0.38 | unknown | 2030234  | 2187889  | 2097045  | 1944138  | 1463364  | 1682428  | 1617095  | 1010312  | 1324699  | 1273388  | 17482172 | 19144630 | 2145402  | 2079111  | 1270016  | 1715929  | 2581553  | 1896934  |          |
| EIC     | Negative | 570.2976 | 3.10 | unknown | 138866   | 98281    | 152579   | 92812    | 51586    | 125118   | 54187    | 130871   | 114050   | 141764   | 104240   | 148263   | 104899   | 72893    | 113222   | 137257   | 110159   | 68087    | 182506   |
| EIC     | Negative | 316.1998 | 3.76 | unknown | 7038017  | 3971962  | 9168600  | 4850001  | 2433068  | 3424207  | 4785168  | 3942233  | 2967400  | 3630325  | 1865558  | 5219576  | 5667253  | 3992586  | 2961714  | 5212620  | 4479316  | 6966138  | 2926326  |
| fpHILIC | Positive | 148.1097 | 5.22 | unknown | 922529   | 1057852  | 873396   | 599467   | 689798   | 995125   | 799132   | 489689   | 786347   | 675872   | 1076867  | 1154514  | 1066745  | 961531   | 1321959  | 985056   | 832253   | 774120   | 921614   |
| EIC     | Negative | 299.2235 | 4.44 | unknown | 1294257  | 538953   | 1639853  | 1315066  | 669643   | 788031   | 698857   | 1262250  | 576476   | 1430722  | 662424   | 817730   | 619719   | 816378   | 655235   | 1264218  | 821473   | 1774157  | 673781   |
| EIC     | Negative | 555.3885 | 3.65 | unknown | 247      |          |          |          |          |          |          |          |          |          |          |          |          |          |          |          |          |          |          |

|         |          |          |      |           |          |          |          |          |          |          |          |          |          |          |          |          |          |          |          |          |          |          |          |
|---------|----------|----------|------|-----------|----------|----------|----------|----------|----------|----------|----------|----------|----------|----------|----------|----------|----------|----------|----------|----------|----------|----------|----------|
| fpHILIC | Negative | 218.0406 | 2.94 | unknown   | 2070859  | 2372125  | 2884668  | 2078749  | 1881462  | 2056395  | 1658468  | 2132988  | 1791050  | 2639520  | 1776201  | 2183593  | 1967203  | 1963907  | 2638600  | 2001690  | 2557135  | 3233660  | 1951042  |
| EIC     | Negative | 293.2487 | 4.99 | unknown   | 259379   | 112842   | 259690   | 181674   | 116837   | 78806    | 123753   | 197681   | 137184   | 346390   | 123994   | 144703   | 122926   | 138791   | 197657   | 192053   | 122326   | 231129   | 108520   |
| fpHILIC | Negative | 275.0215 | 4.15 | unknown   | 628859   | 183923   | 230860   | 357468   | 251678   | 330890   | 169808   | 121518   | 46145    | 337943   | 241190   | 198789   | 75454    | 226852   | 290957   | 144062   | 159503   | 434558   | 169143   |
| EIC     | Negative | 357.2060 | 4.05 | unknown   | 531937   | 291448   | 509545   | 740780   | 370189   | 298454   | 258907   | 414850   | 347641   | 1017463  | 310313   | 315697   | 285373   | 302060   | 335364   | 305477   | 472260   | 1721999  | 365771   |
| EIC     | Negative | 625.3344 | 3.94 | unknown   | 725660   | 2865248  | 612709   | 1032568  | 1466690  | 1599372  | 645556   | 562192   | 1137727  | 1137727  | 2754193  | 1851430  | 2097084  | 1834433  | 1886222  | 1621921  | 1956415  | 783460   | 2302120  |
| EIC     | Negative | 509.2789 | 5.84 | unknown   | 1364576  | 1354292  | 1185703  | 1024443  | 1089382  | 594527   | 948502   | 1135500  | 489272   | 901234   | 1004904  | 936797   | 850520   | 1439220  | 1229887  | 526643   | 1102652  | 1573988  | 1118334  |
| EIC     | Negative | 618.3422 | 3.25 | unknown   | 2302528  | 1613612  | 1525599  | 1666336  | 1158499  | 2519267  | 1434433  | 1691820  | 1565422  | 2016026  | 1545961  | 2709363  | 1689058  | 969317   | 1808673  | 2547297  | 2168592  | 1090023  | 2784342  |
| fpHILIC | Positive | 300.1188 | 3.16 | unknown   | 1003827  | 1384234  | 896768   | 770008   | 975502   | 1105432  | 1097592  | 922539   | 902423   | 1046732  | 1726843  | 1431757  | 1350475  | 1411668  | 1695152  | 1335867  | 1036429  | 1093872  | 1366429  |
| fpHILIC | Positive | 144.1016 | 2.19 | unknown   | 589618   | 510941   | 390335   | 569804   | 788397   | 0        | 421167   | 964058   | 446810   | 448198   | 628891   | 562362   | 388750   | 502763   | 857156   | 649086   | 457347   | 370468   | 675368   |
| EIC     | Negative | 285.2073 | 4.37 | unknown   | 497783   | 320779   | 571971   | 583435   | 243969   | 222129   | 398661   | 335449   | 333578   | 351287   | 338327   | 545053   | 595648   | 391882   | 383487   | 457861   | 391289   | 432390   | 336821   |
| fpHILIC | Positive | 122.0698 | 3.18 | unknown   | 884145   | 1092683  | 797048   | 761070   | 817369   | 1040221  | 871915   | 624653   | 858380   | 714419   | 1088124  | 963131   | 1171767  | 1121228  | 1339970  | 1104871  | 959837   | 803896   | 1292315  |
| EIC     | Negative | 318.1428 | 2.35 | unknown   | 326059   | 152458   | 476105   | 463795   | 88872    | 139373   | 159294   | 357548   | 88132    | 280438   | 137981   | 251316   | 211478   | 178560   | 289110   | 205506   | 178407   | 297122   | 117934   |
| EIC     | Negative | 363.2008 | 3.74 | unknown   | 2689993  | 231159   | 563425   | 6502531  | 121471   | 315405   | 186982   | 118860   | 99004    | 0        | 1196967  | 226350   | 97195    | 49642    | 129446   | 297322   | 167047   | 305768   | 199792   |
| fpHILIC | Positive | 133.1049 | 2.40 | unknown   | 14457123 | 14122018 | 12267772 | 8633252  | 11134102 | 16466432 | 13037744 | 6800494  | 12246001 | 12847524 | 14240488 | 14703525 | 13079928 | 16855024 | 25617728 | 16260124 | 10313482 | 10332789 | 15505828 |
| EIC     | Negative | 619.3471 | 3.06 | unknown   | 795142   | 572347   | 507700   | 465960   | 378292   | 843294   | 525985   | 551070   | 546533   | 652447   | 518201   | 926248   | 565710   | 337018   | 617713   | 845010   | 942748   | 395991   | 914309   |
| EIC     | Negative | 495.1974 | 2.67 | unknown   | 103880   | 172017   | 127490   | 153877   | 117672   | 103485   | 161014   | 107819   | 142795   | 130120   | 146133   | 222812   | 208363   | 181128   | 147229   | 153250   | 180131   | 187805   | 160142   |
| EIC     | Negative | 135.1250 | 2.15 | unknown   | 249001   | 215786   | 276821   | 292574   | 133725   | 137803   | 153268   | 228828   | 92740    | 176065   | 120654   | 270791   | 226957   | 227481   | 273872   | 225685   | 173544   | 167126   | 137736   |
| EIC     | Negative | 507.2727 | 5.59 | unknown   | 10194286 | 14172119 | 10098083 | 9185049  | 13407117 | 7053370  | 11295298 | 11529177 | 5333440  | 8671492  | 11753157 | 9551059  | 7872443  | 15764723 | 16855773 | 7103653  | 14093389 | 14003994 | 11684361 |
| EIC     | Negative | 332.1952 | 2.67 | unknown   | 5453347  | 4452023  | 5506200  | 5027146  | 2043969  | 2579197  | 4544706  | 2920461  | 3618287  | 3929139  | 3529574  | 5974381  | 5694484  | 4782401  | 3575397  | 4372973  | 4564525  | 4646580  | 3436410  |
| EIC     | Negative | 367.1685 | 2.67 | unknown   | 256082   | 245374   | 507169   | 89426    | 208509   | 147169   | 208509   | 147158   | 208511   | 208511   | 191682   | 236231   | 256529   | 220735   | 165580   | 216208   | 197364   | 186033   | 189610   |
| fpHILIC | Positive | 157.0798 | 3.32 | unknown   | 11282682 | 5375450  | 11040516 | 7432561  | 4097376  | 5112137  | 4744253  | 6055331  | 4167064  | 9654556  | 5417475  | 6666693  | 5322983  | 6240166  | 7904535  | 5173464  | 4176313  | 9190466  | 5854390  |
| fpHILIC | Positive | 174.0599 | 2.71 | unknown   | 663942   | 485624   | 533792   | 489375   | 458873   | 434728   | 308487   | 487304   | 226739   | 551890   | 424845   | 4565650  | 356759   | 556595   | 547873   | 562373   | 329867   | 502881   | 484235   |
| EIC     | Negative | 479.2028 | 3.61 | unknown   | 160822   | 167845   | 299922   | 206180   | 80628    | 116988   | 161123   | 129379   | 9414     | 148238   | 183033   | 228550   | 257904   | 186506   | 106379   | 169103   | 167046   | 177762   | 150782   |
| EIC     | Negative | 528.1782 | 3.19 | unknown   | 787239   | 237009   | 347465   | 595287   | 317061   | 199325   | 249600   | 716548   | 299340   | 4599885  | 338450   | 354347   | 387078   | 156847   | 233389   | 643878   | 442898   | 664207   | 285030   |
| fpHILIC | Positive | 258.0747 | 2.52 | unknown   | 795053   | 697458   | 466486   | 630660   | 493564   | 903803   | 473632   | 448874   | 657173   | 610627   | 812902   | 858044   | 596989   | 648546   | 805927   | 807115   | 569079   | 815123   | 911034   |
| EIC     | Negative | 519.3686 | 6.70 | unknown   | 426490   | 797203   | 446281   | 334397   | 396811   | 482306   | 437218   | 209410   | 289590   | 326597   | 1312761  | 807161   | 738135   | 896732   | 771366   | 461006   | 308181   | 388017   | 500106   |
| EIC     | Negative | 422.2299 | 5.92 | unknown   | 3564531  | 3298966  | 2715958  | 2295244  | 2753935  | 2388673  | 1749619  | 1879877  | 1429815  | 1509649  | 3241217  | 2737907  | 3056995  | 2771885  | 3311000  | 2881494  | 2702457  | 2478059  | 2028339  |
| fpHILIC | Positive | 130.0864 | 5.21 | unknown   | 16150545 | 21310190 | 15246231 | 13074269 | 13989051 | 18061788 | 15211785 | 8828678  | 12390357 | 12744620 | 18698798 | 21726256 | 19202362 | 17541428 | 24827352 | 19444786 | 14314744 | 14296635 | 17176858 |
| fpHILIC | Positive | 361.1444 | 2.47 | unknown   | 3096188  | 2322049  | 2309296  | 1323580  | 5654812  | 2147005  | 1451043  | 1587888  | 1692970  | 1601460  | 2265857  | 2411059  | 2227498  | 2885928  | 2709830  | 2092856  | 1676480  | 227348   | 2502623  |
| EIC     | Negative | 355.1400 | 1.62 | unknown   | 1646296  | 1406479  | 993107   | 172646   | 107428   | 1109314  | 559504   | 1083247  | 467506   | 992644   | 836627   | 912813   | 502237   | 2057097  | 1340431  | 492933   | 843820   | 926196   | 1215011  |
| fpHILIC | Positive | 107.0494 | 2.06 | unknown   | 828713   | 455675   | 751717   | 385474   | 353885   | 473292   | 396053   | 416791   | 362505   | 596219   | 410424   | 492472   | 350966   | 626973   | 740371   | 587717   | 401766   | 623436   | 409906   |
| EIC     | Negative | 332.9485 | 0.52 | unknown   | 153677   | 0        | 92655    | 0        | 48131    | 67653    | 0        | 73163    | 219476   | 51480    | 0        | 0        | 58222    | 0        | 72012    | 0        | 0        | 177139   | 0        |
| EIC     | Negative | 258.1799 | 2.09 | unknown   | 191796   | 149601   | 205627   | 154072   | 83434    | 153273   | 124722   | 70969    | 92952    | 145487   | 135913   | 214529   | 225916   | 146349   | 156154   | 212288   | 146731   | 72659    | 104940   |
| EIC     | Negative | 410.7598 | 0.52 | unknown   | 690112   | 393641   | 671362   | 743016   | 327711   | 398367   | 459580   | 222152   | 456442   | 893370   | 396812   | 389611   | 492737   | 119593   | 373434   | 444765   | 334429   | 564544   | 743297   |
| EIC     | Negative | 384.1853 | 3.19 | unknown   | 409911   | 77602    | 575962   | 382017   | 76231    | 93354    | 94131    | 30268    | 209647   | 411300   | 26288    | 137619   | 137912   | 144739   | 98010    | 141971   | 412126   | 147969   | 0        |
| EIC     | Negative | 357.2301 | 3.84 | unknown   | 2171566  | 360247   | 2755811  | 794329   | 310532   | 550536   | 405013   | 1189697  | 63948    | 1374084  | 284983   | 595179   | 324791   | 461398   | 412961   | 148930   | 390338   | 1724129  | 651199   |
| EIC     | Negative | 289.1449 | 1.88 | unknown   | 753854   | 582721   | 0        | 0        | 264213   | 526336   | 518836   | 0        | 549685   | 694627   | 799419   | 664357   | 349243   | 699192   | 610012   | 0        | 0        | 558681   | 0        |
| EIC     | Negative | 421.2265 | 5.92 | unknown   | 15324260 | 13994598 | 11840955 | 10173110 | 11709975 | 10173548 | 7403877  | 8079392  | 6231468  | 6733419  | 14289429 | 11883451 | 13129763 | 12038966 | 14274506 | 12328698 | 11477516 | 10644066 | 8886110  |
| EIC     | Negative | 508.2763 | 5.59 | unknown   | 2723325  | 3955939  | 2780397  | 2416660  | 3638687  | 1945690  | 3076907  | 3064401  | 3076907  | 3057071  | 3196385  | 2572330  | 2121509  | 4257537  | 4551497  | 1891196  | 3816701  | 3913103  | 3184442  |
| EIC     | Negative | 313.2386 | 5.99 | unknown   | 776460   | 551454   | 1314955  | 712360   | 213394   | 388449   | 245093   | 181556   | 605630   | 294308   | 366487   | 630694   | 521158   | 359236   | 317878   | 380725   | 504856   | 712668   | 244849   |
| fpHILIC | Negative | 157.0504 | 0.97 | unknown   | 769377   | 997618   | 1093558  | 564133   | 716692   | 609537   | 613905   | 403172   | 812126   | 71728    | 1821126  | 490844   | 633727   | 476970   | 404106   | 393907   | 391489   | 1906653  | 377483   |
| fpHILIC | Negative | 298.1141 | 3.16 | unknown   | 42170100 | 56314656 | 40682136 | 35806804 | 39045728 | 45999044 | 52713300 | 39701372 | 39342520 | 42943132 | 74104760 | 66888928 | 56525800 | 62823572 | 71295064 | 60688756 | 46876224 | 42605156 | 65376096 |
| fpHILIC | Negative | 173.0567 | 2.71 | unknown   | 9663102  | 7000558  | 7715302  | 7514074  | 5526219  | 6352408  | 4291455  | 7234836  | 3177674  | 7015775  | 6569377  | 6457585  | 5940073  | 7784485  | 7649646  | 71928032 | 5292831  | 7259098  | 7042361  |
| fpHILIC | Positive | 383.2015 | 3.22 | unknown   | 403779   | 297983   | 367707   | 506663   | 205064   | 410904   | 212546   | 181929   | 251890   | 3802629  | 375790   | 426180   | 420610   | 466016   | 253689   | 353257   | 247380   | 412164   | 402893   |
| EIC     | Negative | 259.0647 | 1.77 | unknown   | 1005996  | 2766650  | 811960   | 87410    | 952652   | 1010428  | 1969202  | 1136513  | 618060   | 0        | 3314819  | 3592002  | 1583888  | 3327758  | 2798420  | 1656761  | 1118263  | 0        | 1959603  |
| fpHILIC | Positive | 123.0438 | 2.95 | unknown   | 5456581  | 4339021  | 5248326  | 3282703  | 2943476  | 3465632  | 2753725  | 3185871  | 3076147  | 4386672  | 3027268  | 2896572  | 2979519  | 4368035  | 4592880  | 3351176  | 3631238  | 5413628  | 3471584  |
| EIC     | Negative | 500.2888 | 3.41 | unknown   | 2323666  | 1131527  | 2214450  | 5012789  | 1362207  | 1842114  | 1935956  | 3050682  | 1917113  | 4345390  | 2226049  | 2052722  | 2989131  | 4339971  | 1433398  | 2131746  | 3108294  | 5967378  | 769804   |
| EIC     | Negative | 433.2212 | 1.78 | unknown</ |          |          |          |          |          |          |          |          |          |          |          |          |          |          |          |          |          |          |          |

|         |          |          |      |         |          |          |          |          |          |          |          |          |          |          |          |          |          |          |          |          |          |          |          |
|---------|----------|----------|------|---------|----------|----------|----------|----------|----------|----------|----------|----------|----------|----------|----------|----------|----------|----------|----------|----------|----------|----------|----------|
| fpHILIC | Negative | 200.0154 | 2.96 | unknown | 371030   | 512237   | 327769   | 165929   | 220642   | 443973   | 328545   | 246901   | 320385   | 209427   | 336794   | 408070   | 369916   | 731195   | 470138   | 235069   | 409197   | 350380   | 632857   |
| fpHILIC | Negative | 190.0541 | 0.61 | unknown | 32952584 | 21256540 | 24283652 | 23001388 | 14074455 | 19650720 | 16224852 | 15582322 | 12556415 | 16800272 | 22868370 | 20044974 | 14167829 | 19991208 | 27822568 | 14584969 | 18040304 | 22319860 | 22225066 |
| fpHILIC | Positive | 87.1002  | 2.40 | unknown | 1017756  | 819863   | 679283   | 537298   | 720786   | 1106128  | 763319   | 378662   | 704845   | 808194   | 26883070 | 899601   | 860573   | 937315   | 1885665  | 931798   | 624383   | 612423   | 585765   |
| fpHILIC | Positive | 119.0835 | 2.71 | unknown | 678470   | 771751   | 752360   | 503821   | 724178   | 844766   | 703751   | 508817   | 558355   | 695308   | 986437   | 1000378  | 779518   | 1188875  | 1248330  | 875946   | 811368   | 597389   | 960281   |
| fpHILIC | Negative | 335.1296 | 3.34 | unknown | 1325716  | 753262   | 1174269  | 889513   | 558336   | 652596   | 602596   | 780806   | 526119   | 6709297  | 863008   | 869519   | 764020   | 952517   | 1083803  | 725495   | 589848   | 986101   | 817516   |
| fpHILIC | Positive | 156.0777 | 3.61 | unknown | 93859464 | 46294484 | 60937708 | 58217520 | 29960100 | 41817528 | 31366394 | 39735924 | 35248428 | 67092962 | 38232404 | 41439996 | 35946296 | 40705552 | 56917880 | 43154040 | 34558944 | 61408680 | 43664988 |
| EIC     | Negative | 392.2169 | 2.67 | unknown | 176292   | 119930   | 174306   | 143906   | 74484    | 71350    | 144796   | 47972    | 115079   | 116470   | 100591   | 172093   | 170214   | 65844    | 109705   | 124304   | 1405758  | 136164   | 99703    |
| EIC     | Negative | 310.2108 | 3.80 | unknown | 2540688  | 685739   | 3385677  | 2415253  | 736044   | 761914   | 751607   | 2165469  | 629855   | 4083446  | 704792   | 869826   | 678477   | 1619922  | 1329378  | 556232   | 882910   | 2873165  | 1151116  |
| EIC     | Negative | 227.1652 | 2.62 | unknown | 182628   | 273634   | 196136   | 183119   | 299643   | 181189   | 122447   | 196679   | 331812   | 354263   | 362390   | 291919   | 155773   | 219210   | 359742   | 345180   | 157733   | 374816   | 226180   |
| EIC     | Negative | 589.4474 | 4.14 | unknown | 198540   | 167034   | 453452   | 440429   | 94227    | 75186    | 134099   | 187550   | 143781   | 218703   | 103650   | 179508   | 183227   | 230283   | 142155   | 124105   | 192718   | 237302   | 122563   |
| EIC     | Negative | 423.2266 | 5.92 | unknown | 1162244  | 1059003  | 898789   | 765597   | 850340   | 747495   | 561972   | 618414   | 451674   | 505243   | 1054195  | 880468   | 987446   | 878163   | 1084321  | 950543   | 889602   | 778313   | 649870   |
| fpHILIC | Negative | 201.1131 | 0.61 | unknown | 1003294  | 1176996  | 848137   | 1834515  | 601377   | 1878809  | 904107   | 1064463  | 1405181  | 1683819  | 2088929  | 1953082  | 2965516  | 1175332  | 1584119  | 2409929  | 1298102  | 1494489  | 1105536  |
| fpHILIC | Positive | 111.0748 | 3.33 | unknown | 503575   | 223938   | 601936   | 398142   | 237816   | 237576   | 364619   | 324173   | 185092   | 572796   | 340848   | 275125   | 325410   | 305118   | 438741   | 227909   | 243987   | 455200   | 453833   |
| EIC     | Negative | 406.7654 | 0.52 | unknown | 439044   | 229310   | 431144   | 305650   | 271475   | 342440   | 171703   | 70880    | 395299   | 585930   | 296751   | 237403   | 261167   | 0        | 280777   | 363611   | 182572   | 374816   | 486780   |
| EIC     | Negative | 320.9970 | 0.68 | unknown | 129009   | 166759   | 187337   | 118954   | 107761   | 104467   | 116777   | 127388   | 99894    | 158940   | 137589   | 128072   | 162292   | 155792   | 140325   | 168634   | 129348   | 168910   | 143173   |
| fpHILIC | Positive | 165.0542 | 2.95 | unknown | 23106582 | 17161544 | 23791170 | 14762781 | 12948536 | 14154799 | 12001328 | 13008197 | 13343301 | 19272474 | 11353236 | 12170436 | 12431084 | 19324486 | 19277438 | 13192857 | 16693209 | 22286650 | 16947332 |
| EIC     | Negative | 643.3460 | 3.15 | unknown | 286185   | 400603   | 189372   | 229755   | 213719   | 389322   | 222424   | 215011   | 407397   | 295009   | 331498   | 424829   | 339898   | 184579   | 306741   | 527674   | 455300   | 157385   | 509327   |
| EIC     | Negative | 369.1736 | 2.90 | unknown | 0        | 0        | 445710   | 0        | 0        | 351100   | 0        | 0        | 0        | 0        | 0        | 388701   | 0        | 0        | 0        | 0        | 0        | 474493   | 0        |
| fpHILIC | Negative | 278.1247 | 2.57 | unknown | 327074   | 703243   | 624346   | 310969   | 308118   | 528932   | 831648   | 257818   | 208514   | 523810   | 662800   | 572502   | 498976   | 561001   | 893341   | 384463   | 498095   | 456285   | 653483   |
| fpHILIC | Positive | 102.0373 | 2.47 | unknown | 1404219  | 1758962  | 1430231  | 725208   | 935441   | 1412174  | 826806   | 840426   | 806693   | 919438   | 1172495  | 1239280  | 1060573  | 2194214  | 1457672  | 1003351  | 1429295  | 1205961  | 1740967  |
| fpHILIC | Negative | 137.0356 | 1.01 | unknown | 1527715  | 660345   | 455231   | 518597   | 745615   | 787036   | 315711   | 700460   | 1172980  | 1167666  | 732181   | 816528   | 862409   | 1143276  | 713084   | 885328   | 1476203  | 1441824  | 517581   |
| EIC     | Negative | 283.1531 | 3.31 | unknown | 379871   | 441892   | 237164   | 200338   | 375512   | 313072   | 314112   | 311217   | 238531   | 252014   | 338624   | 353225   | 337934   | 337452   | 432014   | 344242   | 447053   | 371877   | 505126   |
| fpHILIC | Negative | 204.0860 | 2.61 | unknown | 4517851  | 5719065  | 4655108  | 2888145  | 3916412  | 4627120  | 5163000  | 3233347  | 3541776  | 732035   | 5339578  | 4905185  | 4287693  | 6034595  | 7441778  | 5525132  | 4399416  | 4814835  | 5539436  |
| fpHILIC | Positive | 253.1146 | 2.79 | unknown | 723867   | 751424   | 903538   | 841672   | 664382   | 720082   | 471960   | 644968   | 720485   | 770201   | 795668   | 854590   | 616048   | 829106   | 1103895  | 648802   | 687232   | 961151   | 960269   |
| EIC     | Negative | 594.3423 | 2.43 | unknown | 1041070  | 856688   | 1482650  | 848846   | 479630   | 791327   | 659023   | 1126684  | 392857   | 373278   | 888894   | 899404   | 668827   | 1683839  | 825271   | 489903   | 697594   | 1308637  | 1438394  |
| EIC     | Negative | 330.1794 | 2.42 | unknown | 238173   | 249440   | 373397   | 195345   | 158409   | 151915   | 122697   | 91004    | 508956   | 143613   | 173434   | 192100   | 188561   | 178561   | 173574   | 181875   | 165750   | 187681   | 202602   |
| EIC     | Negative | 570.2952 | 3.10 | unknown | 135754   | 92518    | 153747   | 96963    | 51586    | 118926   | 65910    | 130871   | 95629    | 142348   | 104838   | 149533   | 104899   | 76539    | 98292    | 127133   | 106684   | 68087    | 227203   |
| fpHILIC | Negative | 896.9057 | 3.78 | unknown | 702476   | 204232   | 37687    | 1063657  | 119705   | 328773   | 0        | 821423   | 769838   | 146371   | 372064   | 500263   | 1442680  | 177375   | 206066   | 191123   | 1351077  | 743646   | 273543   |
| EIC     | Negative | 618.3423 | 2.71 | unknown | 2823477  | 2355167  | 1534413  | 1801657  | 1401188  | 3400554  | 2212233  | 1886550  | 2461851  | 3366092  | 2526025  | 4037739  | 2655564  | 1332134  | 2585707  | 3333704  | 3787092  | 1713410  | 4002015  |
| EIC     | Negative | 427.1797 | 3.24 | unknown | 84630    | 46865    | 90432    | 73615    | 20079    | 31833    | 32446    | 27328    | 20893    | 58251    | 33919    | 36655    | 28164    | 26475    | 26230    | 30084    | 43587    | 28929    | 39299    |
| fpHILIC | Negative | 155.0463 | 2.59 | unknown | 1305434  | 1215486  | 1109403  | 1238334  | 711582   | 1765602  | 938085   | 809196   | 552460   | 1194482  | 1644080  | 1617443  | 1677045  | 1544387  | 1274072  | 965197   | 1602740  | 920673   | 1730460  |
| fpHILIC | Positive | 131.0906 | 2.30 | unknown | 5814940  | 4348916  | 4809612  | 2855842  | 3874862  | 5437142  | 4633048  | 2111818  | 3843015  | 4804167  | 4836933  | 5215613  | 3895199  | 5692208  | 10350652 | 4773115  | 3627779  | 3439764  | 4885705  |
| fpHILIC | Positive | 131.0896 | 5.22 | unknown | 1125161  | 1578045  | 1056194  | 862539   | 855965   | 1200854  | 992492   | 5962363  | 867376   | 803580   | 1262517  | 1527152  | 1344811  | 1198912  | 1682880  | 1398725  | 920839   | 974187   | 1157902  |
| fpHILIC | Negative | 299.1175 | 3.16 | unknown | 4919415  | 6419202  | 4796674  | 4030048  | 4483212  | 5247518  | 5983895  | 4325711  | 4732878  | 4874781  | 8596126  | 8220688  | 6805421  | 7331079  | 8412997  | 6976083  | 5545222  | 5246221  | 7531583  |
| EIC     | Negative | 239.1287 | 2.33 | unknown | 425816   | 206582   | 302614   | 510330   | 211063   | 267258   | 72425    | 106294   | 374300   | 274690   | 191470   | 242399   | 313600   | 127480   | 259272   | 321420   | 196553   | 397378   | 1375759  |
| EIC     | Negative | 332.1952 | 2.17 | unknown | 1244631  | 789601   | 1328909  | 1225137  | 401386   | 376260   | 598771   | 497053   | 457186   | 1091404  | 517817   | 778947   | 568070   | 513389   | 487367   | 794021   | 541254   | 656431   | 688515   |
| EIC     | Negative | 409.2248 | 2.48 | unknown | 173321   | 172770   | 0        | 121368   | 68590    | 134978   | 81391    | 0        | 0        | 0        | 81654    | 160841   | 134914   | 123798   | 100862   | 137496   | 139651   | 116891   | 113007   |
| fpHILIC | Negative | 155.0655 | 3.34 | unknown | 2442274  | 1438174  | 2407172  | 1506229  | 1182408  | 1303005  | 1052325  | 1252411  | 987193   | 1673650  | 1339391  | 1382530  | 1208383  | 1769108  | 2135644  | 1328836  | 1100042  | 1762070  | 1550180  |
| EIC     | Negative | 378.9556 | 0.67 | unknown | 87866    | 101169   | 130390   | 84098    | 71248    | 85098    | 81074    | 81074    | 81074    | 81074    | 81074    | 81074    | 81074    | 81074    | 88212    | 113462   | 84352    | 110114   | 104109   |
| fpHILIC | Positive | 317.2113 | 0.39 | unknown | 1194342  | 800486   | 1696550  | 1072410  | 359856   | 646497   | 728534   | 647607   | 492697   | 902928   | 744719   | 983131   | 1009799  | 680230   | 470098   | 888420   | 935671   | 943083   | 692318   |
| fpHILIC | Positive | 120.0300 | 3.18 | unknown | 400302   | 504713   | 296935   | 287640   | 341217   | 271574   | 391958   | 329251   | 487834   | 507791   | 573036   | 548210   | 541721   | 573036   | 548210   | 541721   | 573036   | 548210   | 541721   |
| EIC     | Negative | 345.1712 | 3.77 | unknown | 456962   | 611403   | 579489   | 364527   | 190856   | 233246   | 423670   | 174779   | 204253   | 772664   | 380184   | 522615   | 514300   | 249855   | 342166   | 396575   | 313354   | 247440   | 379080   |
| EIC     | Negative | 373.2960 | 4.92 | unknown | 82593    | 244931   | 524608   | 318017   | 83060    | 26363    | 69936    | 171545   | 102833   | 151315   | 169878   | 136991   | 114048   | 66162    | 107693   | 263035   | 52451    | 263035   | 52451    |
| fpHILIC | Positive | 157.0796 | 3.61 | unknown | 6208549  | 3036894  | 4210267  | 3910353  | 1955823  | 2580641  | 2093879  | 2676814  | 2720257  | 4327655  | 2612762  | 2376252  | 2391271  | 2675667  | 3723554  | 2953554  | 2298227  | 3894399  | 2992016  |
| EIC     | Negative | 389.1923 | 3.88 | unknown | 88651    | 65012    | 110131   | 119927   | 71053    | 93360    | 78574    | 145247   | 109189   | 126611   | 82644    | 139707   | 93305    | 110393   | 82511    | 96423    | 101213   | 307224   | 93843    |
| EIC     | Negative | 581.2886 | 3.41 | unknown | 279442   | 134908   | 270246   | 457057   | 139250   | 232059   | 230172   | 330268   | 245313   | 531078   | 271581   | 242314   | 334879   | 55329    | 174651   | 277574   | 345486   | 714489   | 101741   |
| EIC     | Negative | 374.2059 | 3.94 | unknown | 71077    | 62870    | 119061   | 79182    | 21094    | 97518    | 55055    | 28589    | 25631    | 27795    | 62574    | 87338    | 101520   | 75249    | 21829    | 75761    | 79777    | 91244    | 43878    |
| fpHILIC | Positive | 119.4040 | 2.94 | unknown | 2749857  | 2188461  | 2612335  | 1866572  | 1325451  | 1523512  | 1374958  | 1523066  | 1553814  | 2205620  | 1402285  | 1455885  | 1437170  | 2        |          |          |          |          |          |



|         |          |          |      |         |          |          |          |          |          |          |          |          |          |          |          |          |          |          |          |          |          |          |          |
|---------|----------|----------|------|---------|----------|----------|----------|----------|----------|----------|----------|----------|----------|----------|----------|----------|----------|----------|----------|----------|----------|----------|----------|
| fpHILIC | Positive | 104.0529 | 2.46 | unknown | 10317424 | 10552874 | 8745997  | 4061318  | 5496007  | 9099711  | 6087006  | 5438370  | 6163786  | 5796204  | 7895153  | 9193613  | 7102168  | 15201949 | 10817158 | 6791311  | 7000285  | 8393424  | 11861309 |
| EIC     | Negative | 413.1947 | 2.67 | unknown | 1406271  | 1229648  | 1146796  | 1321639  | 623298   | 744967   | 1239856  | 756593   | 994675   | 1080866  | 1029370  | 1558045  | 1766526  | 1332923  | 1022514  | 1211762  | 1255484  | 13704709 | 1262907  |
| EIC     | Negative | 262.1166 | 2.87 | unknown | 494549   | 183389   | 969533   | 311475   | 136299   | 234227   | 199026   | 439112   | 68586    | 722323   | 261279   | 366536   | 182345   | 321767   | 238165   | 122205   | 251461   | 612495   | 172931   |
| EIC     | Negative | 407.2439 | 1.51 | unknown | 682929   | 1703482  | 713346   | 1073336  | 928033   | 1191230  | 1123497  | 508529   | 1121043  | 769930   | 2254952  | 734658   | 1899613  | 2032097  | 1111762  | 2339374  | 763990   | 1227840  | 1333130  |
| EIC     | Negative | 516.2735 | 2.60 | unknown | 836949   | 489449   | 843798   | 0        | 341151   | 171030   | 355624   | 0        | 515191   | 0        | 363968   | 494858   | 393831   | 280253   | 519703   | 519255   | 911517   | 0        | 808402   |
| EIC     | Negative | 329.1762 | 2.42 | unknown | 1016986  | 1122400  | 1795251  | 860693   | 631949   | 656140   | 550487   | 364089   | 660360   | 628268   | 736728   | 900225   | 845604   | 817811   | 769419   | 834840   | 719928   | 793555   | 863545   |
| EIC     | Negative | 642.3422 | 3.06 | unknown | 1276430  | 1676811  | 879146   | 995476   | 1114447  | 1658523  | 1241700  | 783655   | 1808250  | 1277982  | 1589348  | 1879246  | 1393987  | 859110   | 1510720  | 2227316  | 2216185  | 728053   | 2514473  |
| EIC     | Negative | 379.1777 | 3.31 | unknown | 187726   | 39178    | 377995   | 129589   | 21325    | 52608    | 16687    | 179667   | 13271    | 196509   | 48684    | 77033    | 63396    | 138321   | 36116    | 17763    | 75575    | 134350   | 130969   |
| fpHILIC | Positive | 158.0813 | 3.32 | unknown | 691168   | 372336   | 749844   | 388196   | 250560   | 276985   | 316856   | 452172   | 228400   | 360297   | 483309   | 426500   | 335133   | 412088   | 476949   | 315638   | 329650   | 564108   | 436981   |
| EIC     | Negative | 258.1798 | 2.24 | unknown | 257486   | 74789    | 199404   | 283853   | 67700    | 120355   | 63493    | 122707   | 97857    | 283566   | 99421    | 133471   | 114550   | 149566   | 106667   | 114793   | 95223    | 226653   | 114151   |
| EIC     | Negative | 362.1685 | 2.59 | unknown | 78153    | 224816   | 0        | 68637    | 99210    | 108058   | 172940   | 0        | 128793   | 0        | 70841    | 230183   | 328025   | 406670   | 210720   | 214724   | 27395    | 0        | 201279   |
| fpHILIC | Positive | 360.1966 | 5.21 | unknown | 510951   | 646193   | 456302   | 439105   | 457859   | 519511   | 493535   | 401565   | 0        | 477753   | 578755   | 575994   | 533621   | 495958   | 558315   | 559167   | 568061   | 459407   | 466858   |
| EIC     | Negative | 334.2109 | 3.53 | unknown | 388484   | 211374   | 625315   | 323818   | 109127   | 112463   | 204717   | 174620   | 109518   | 220646   | 144689   | 189500   | 229722   | 122295   | 164034   | 189944   | 174352   | 242258   | 220583   |
| EIC     | Negative | 375.2175 | 3.61 | unknown | 402707   | 238074   | 826939   | 389812   | 113931   | 192572   | 302323   | 230376   | 148662   | 837345   | 333760   | 411517   | 480426   | 328006   | 136669   | 270337   | 334736   | 347157   | 290154   |
| EIC     | Negative | 237.0224 | 1.77 | unknown | 182043   | 177319   | 174619   | 92463    | 137787   | 181634   | 161803   | 86794    | 161827   | 145147   | 165875   | 221923   | 300283   | 182126   | 146044   | 229608   | 485995   | 0        | 157235   |
| EIC     | Negative | 642.3422 | 3.20 | unknown | 711667   | 783492   | 409210   | 466033   | 378156   | 481907   | 443341   | 603833   | 370150   | 313491   | 632120   | 448308   | 509668   | 641608   | 474748   | 264306   | 459366   | 807580   | 736569   |
| EIC     | Negative | 643.3458 | 2.68 | unknown | 474488   | 541639   | 289754   | 334675   | 305066   | 603833   | 370150   | 313491   | 632120   | 448308   | 509668   | 641608   | 474748   | 264306   | 459366   | 807580   | 736569   | 232371   | 812758   |
| EIC     | Negative | 345.1709 | 2.45 | unknown | 1095505  | 2515818  | 1115093  | 950585   | 1167245  | 2071300  | 1858656  | 500526   | 1248937  | 763650   | 2522945  | 3048013  | 3667397  | 2644142  | 3381911  | 2421194  | 2373250  | 774472   | 594259   |
| fpHILIC | Negative | 181.0712 | 2.95 | unknown | 2725116  | 1904407  | 2374904  | 1537298  | 1319724  | 1542349  | 1424242  | 1599968  | 1440106  | 2162293  | 1212314  | 1469413  | 1285457  | 2512447  | 2571169  | 1355613  | 1675819  | 2666862  | 1976336  |
| EIC     | Negative | 333.2075 | 3.68 | unknown | 1507431  | 1100494  | 1601440  | 1976988  | 624525   | 449064   | 811442   | 1424900  | 767627   | 464056   | 449028   | 352534   | 669622   | 951766   | 625451   | 1054778  | 1064778  | 802750   | 1976336  |
| fpHILIC | Positive | 134.1003 | 4.83 | unknown | 652268   | 517566   | 507520   | 441866   | 446842   | 545707   | 528157   | 397935   | 545258   | 521012   | 442159   | 478709   | 487584   | 581832   | 885471   | 538490   | 834773   | 613454   | 575471   |
| EIC     | Negative | 303.1603 | 3.97 | unknown | 104362   | 89653    | 132138   | 107443   | 454532   | 49625    | 62381    | 49625    | 399529   | 90774    | 139229   | 120811   | 75231    | 72351    | 139639   | 69390    | 71262    | 70645    | 0        |
| EIC     | Negative | 257.1760 | 2.24 | unknown | 1564549  | 368180   | 1292471  | 1798952  | 429643   | 709692   | 398472   | 810180   | 562294   | 1791161  | 506524   | 846140   | 776535   | 932323   | 646191   | 713575   | 589429   | 1432833  | 693656   |
| EIC     | Negative | 329.2332 | 3.49 | unknown | 226734   | 139174   | 238622   | 172852   | 101968   | 101968   | 123472   | 124078   | 307946   | 158562   | 167480   | 117703   | 108660   | 106503   | 195020   | 245550   | 221188   | 143083   | 0        |
| EIC     | Negative | 427.1797 | 2.67 | unknown | 728764   | 637222   | 634241   | 579484   | 291223   | 349689   | 606961   | 450751   | 491655   | 546728   | 564797   | 817882   | 773192   | 661533   | 520918   | 605377   | 702269   | 719718   | 520356   |
| EIC     | Negative | 643.3461 | 3.20 | unknown | 262756   | 291859   | 152444   | 170190   | 142548   | 281946   | 163677   | 291357   | 256913   | 232868   | 329556   | 230804   | 112246   | 214048   | 383892   | 331792   | 122649   | 394728   | 0        |
| fpHILIC | Positive | 106.0490 | 2.46 | unknown | 419296   | 571463   | 404759   | 195812   | 350322   | 474472   | 279925   | 248259   | 291625   | 256313   | 300836   | 466754   | 318444   | 696932   | 490003   | 395723   | 389603   | 481912   | 548919   |
| EIC     | Negative | 468.7190 | 0.52 | unknown | 745899   | 385895   | 758767   | 803085   | 347416   | 375852   | 449769   | 251495   | 502911   | 987724   | 377475   | 331906   | 450622   | 131738   | 353067   | 635813   | 311772   | 574372   | 829594   |
| EIC     | Negative | 352.2214 | 1.83 | unknown | 363376   | 112913   | 298013   | 0        | 37831    | 63264    | 76626    | 78146    | 59761    | 0        | 109954   | 151121   | 108408   | 110759   | 91015    | 121540   | 110096   | 0        | 120219   |
| fpHILIC | Positive | 409.1855 | 2.61 | unknown | 7572457  | 10573501 | 7453878  | 3080569  | 6604584  | 6504635  | 7994075  | 4179901  | 4914646  | 4990663  | 10082755 | 7510446  | 7200840  | 10128518 | 13139208 | 7793568  | 5890716  | 7244097  | 8253022  |
| EIC     | Negative | 336.2265 | 3.16 | unknown | 187022   | 96601    | 172761   | 153666   | 73521    | 68142    | 84993    | 100275   | 77656    | 131434   | 78050    | 128698   | 107651   | 83027    | 69455    | 82543    | 148016   | 192669   | 76910    |
| EIC     | Negative | 319.1910 | 3.21 | unknown | 189261   | 375704   | 208860   | 410512   | 158207   | 94137    | 119661   | 177631   | 109864   | 143014   | 98632    | 173900   | 137355   | 124899   | 271261   | 223873   | 134943   | 161781   | 137535   |
| fpHILIC | Positive | 247.1072 | 1.07 | unknown | 3678982  | 1964889  | 3049326  | 3395347  | 1913109  | 1887104  | 2158799  | 2575631  | 1363304  | 2396630  | 2219373  | 2101574  | 1847442  | 2607508  | 3592381  | 3293257  | 1835417  | 3470760  | 1760734  |
| EIC     | Negative | 543.2982 | 2.55 | unknown | 749116   | 0        | 1463705  | 505375   | 0        | 51201    | 0        | 274398   | 6466     | 417504   | 0        | 0        | 0        | 0        | 0        | 0        | 0        | 468071   | 0        |
| EIC     | Negative | 517.2963 | 2.91 | unknown | 1276126  | 537385   | 1652974  | 3522350  | 750194   | 669591   | 1102733  | 1562259  | 1149360  | 3219416  | 1206830  | 1251708  | 1594046  | 841317   | 894485   | 1701302  | 3545768  | 395934   | 0        |
| fpHILIC | Negative | 89.0438  | 3.35 | unknown | 479658   | 492653   | 352118   | 306736   | 326571   | 424116   | 344291   | 270913   | 365998   | 334191   | 421951   | 451152   | 409652   | 532011   | 636981   | 495192   | 406088   | 517823   | 385825   |
| EIC     | Negative | 414.1981 | 2.67 | unknown | 322538   | 309676   | 279129   | 266848   | 164420   | 183126   | 304735   | 151276   | 252551   | 241540   | 266848   | 392683   | 306714   | 294475   | 253088   | 306714   | 294475   | 344764   | 265428   |
| EIC     | Negative | 261.0593 | 1.77 | unknown | 42879    | 130846   | 21906    | 34933    | 42966    | 44634    | 90428    | 49244    | 7711     | 18916    | 146770   | 159984   | 82733    | 143834   | 122104   | 7711     | 46881    | 0        | 87796    |
| EIC     | Negative | 367.8767 | 0.70 | unknown | 36411    | 115449   | 97530    | 94033    | 54989    | 57844    | 76392    | 47504    | 100412   | 95963    | 94665    | 31341    | 31341    | 89263    | 103315   | 100852   | 211487   | 6567     | 0        |
| fpHILIC | Positive | 133.0971 | 4.83 | unknown | 12483398 | 9398154  | 9165286  | 8065170  | 8065170  | 9748197  | 9695656  | 7632147  | 9943539  | 9545827  | 7963622  | 8514269  | 9321136  | 10709811 | 17390548 | 9987741  | 14781347 | 11305517 | 10272433 |
| EIC     | Negative | 429.1957 | 2.89 | unknown | 253515   | 223888   | 186586   | 205326   | 129779   | 71653    | 335981   | 300698   | 249864   | 300698   | 334292   | 384319   | 249558   | 258160   | 214164   | 200416   | 256800   | 422727   | 308877   |
| fpHILIC | Positive | 183.0841 | 2.95 | unknown | 22742172 | 16587837 | 21762190 | 13853333 | 12287987 | 13711382 | 10499830 | 12643647 | 12094068 | 16948474 | 11081804 | 11509106 | 11353022 | 18864368 | 21428618 | 12958029 | 14874262 | 21421134 | 15959496 |
| fpHILIC | Positive | 102.0915 | 5.23 | unknown | 866490   | 1395501  | 1357173  | 934437   | 1077248  | 1330677  | 1372437  | 670513   | 925565   | 1081922  | 1518557  | 1973675  | 1420149  | 1539061  | 2072647  | 1717164  | 1179254  | 1114999  | 1526465  |
| fpHILIC | Positive | 222.1223 | 1.65 | unknown | 0        | 725552   | 309811   | 343343   | 335424   | 0        | 459071   | 213914   | 527658   | 337688   | 493082   | 481083   | 409412   | 406865   | 615135   | 620702   | 325012   | 300956   | 313108   |
| EIC     | Negative | 413.2001 | 4.28 | unknown | 720828   | 166188   | 932488   | 451360   | 91385    | 76973    | 173984   | 237451   | 123608   | 847562   | 261838   | 276223   | 276226   | 209912   | 119248   | 179170   | 256374   | 244921   | 196442   |
| fpHILIC | Positive | 110.0714 | 3.32 | unknown | 10838697 | 4769521  | 11115893 | 6820697  | 3533283  | 4264527  | 4645719  | 5258302  | 5314273  | 1238358  | 5330117  | 5140220  | 4889230  | 5498199  | 6619391  | 4826844  | 4145191  | 8554849  | 5908110  |
| fpHILIC | Positive | 197.1014 | 3.14 | unknown | 915449   | 915747   | 1461463  | 810586   | 522782   | 763884   | 890684   | 763267   | 580522   | 915439   | 744983   | 816862   | 801469   | 1032068  | 971033   | 816764   | 871170   | 1238195  | 1093367  |
| EIC     | Negative | 596.3579 | 3.57 | unknown | 233951   | 1586738  | 1742715  | 1045964  | 781425   | 1985871  | 1060526  | 1388542  | 1212662  | 2035710  | 1354572  | 2413114  | 1395067  | 826413   | 1638287  | 2173704  | 2054710  | 977052   | 226948   |
| EIC     | Negative | 331.1919 | 2.17 | unknown | 5806725  | 3548670  | 616      |          |          |          |          |          |          |          |          |          |          |          |          |          |          |          |          |

|         |          |          |      |         |          |          |          |          |           |          |          |          |          |          |          |          |          |          |          |          |          |          |          |
|---------|----------|----------|------|---------|----------|----------|----------|----------|-----------|----------|----------|----------|----------|----------|----------|----------|----------|----------|----------|----------|----------|----------|----------|
| EIC     | Negative | 352.2213 | 1.78 | unknown | 410375   | 170801   | 286131   | 44778    | 57093     | 99835    | 99392    | 78939    | 91000    | 398460   | 159509   | 194626   | 151613   | 159441   | 102916   | 172834   | 159205   | 0        | 177609   |
| fpHILIC | Negative | 465.3042 | 0.34 | unknown | 14548842 | 11850517 | 14316771 | 11402863 | 11475429  | 7275297  | 6942948  | 10185777 | 10834840 | 13573942 | 10208086 | 11330406 | 8703099  | 15284959 | 14756198 | 13506718 | 11039811 | 15458611 | 12425493 |
| EIC     | Negative | 463.2080 | 5.66 | unknown | 460895   | 345292   | 578519   | 381587   | 312647    | 281976   | 329209   | 410719   | 356394   | 475532   | 367988   | 373216   | 489081   | 356290   | 332723   | 488899   | 473574   | 609305   | 527691   |
| EIC     | Negative | 315.1967 | 3.62 | unknown | 15516278 | 10734086 | 27972466 | 16676917 | 5081582   | 7956736  | 13260849 | 9693171  | 6196153  | 13308006 | 13466495 | 18730269 | 21136405 | 13506136 | 6481126  | 12377548 | 13476448 | 16308586 | 12096468 |
| fpHILIC | Positive | 231.1331 | 2.79 | unknown | 6995822  | 7139894  | 6000397  | 4038578  | 4174322   | 6112032  | 3482097  | 3126848  | 3512357  | 4978355  | 5412944  | 5356872  | 4092707  | 6949891  | 8317959  | 4264395  | 4658766  | 5999895  | 6143332  |
| EIC     | Negative | 286.0891 | 0.70 | unknown | 25689    | 75625    | 60302    | 44839    | 33809     | 36558    | 49976    | 72681    | 33482    | 31546    | 60507    | 62112    | 64658    | 25535    | 59863    | 66860    | 60982    | 109266   | 29192    |
| EIC     | Negative | 594.3426 | 3.10 | unknown | 5224935  | 3541869  | 4326624  | 2695906  | 1712083   | 4581376  | 2189480  | 3350364  | 3336905  | 4304860  | 3701640  | 5430882  | 3241717  | 2757471  | 3671186  | 4624803  | 4257462  | 2506334  | 6800082  |
| fpHILIC | Negative | 217.1076 | 0.40 | unknown | 652503   | 801612   | 366897   | 0        | 302648    | 785208   | 0        | 314058   | 218401   | 535238   | 47782    | 652971   | 0        | 1146081  | 988383   | 129113   | 239445   | 266330   | 712443   |
| EIC     | Negative | 297.2074 | 5.11 | unknown | 558749   | 216571   | 597372   | 369702   | 127555    | 192750   | 286786   | 287941   | 276296   | 302245   | 261566   | 470741   | 358367   | 321082   | 216178   | 230909   | 379457   | 598956   | 263703   |
| EIC     | Negative | 631.2416 | 2.38 | unknown | 184619   | 111711   | 295653   | 385291   | 103546    | 55128    | 150738   | 122998   | 136490   | 166037   | 137971   | 144863   | 180363   | 84518    | 85271    | 173347   | 114616   | 350728   | 97096    |
| fpHILIC | Positive | 91.0588  | 3.33 | unknown | 1835877  | 2186132  | 1479488  | 1279489  | 1265591   | 1718722  | 1312747  | 1304319  | 1335974  | 1743952  | 1901452  | 1840395  | 1888632  | 2238586  | 2673734  | 1952959  | 1643164  | 1877655  | 1872018  |
| EIC     | Negative | 396.2463 | 3.32 | unknown | 518991   | 239040   | 607323   | 724308   | 155062    | 156125   | 250956   | 311996   | 216731   | 394397   | 252706   | 343142   | 346864   | 244828   | 228983   | 318738   | 361614   | 434452   | 231814   |
| EIC     | Negative | 316.1998 | 3.62 | unknown | 3431782  | 2427397  | 6235827  | 3593001  | 1087996   | 1728641  | 2961773  | 2149572  | 1338547  | 2900469  | 2982196  | 4012671  | 4621015  | 3026159  | 1476526  | 2755337  | 2948390  | 3569426  | 2653276  |
| EIC     | Negative | 257.1760 | 3.23 | unknown | 826728   | 441523   | 993379   | 824818   | 273785    | 349277   | 453799   | 453414   | 280047   | 634121   | 429311   | 736009   | 764572   | 472715   | 505549   | 562430   | 472949   | 641704   | 433051   |
| EIC     | Negative | 362.1978 | 4.14 | unknown | 401402   | 319914   | 532501   | 336200   | 294599    | 212483   | 266245   | 232681   | 213218   | 253348   | 261505   | 234218   | 256567   | 213395   | 252937   | 378139   | 411013   | 473429   | 246279   |
| EIC     | Negative | 262.0687 | 0.56 | unknown | 103397   | 88550    | 117842   | 78211    | 65643     | 62160    | 60240    | 60966    | 62160    | 92595    | 57736    | 82651    | 67433    | 53686    | 87725    | 66149    | 76762    | 148128   | 83575    |
| fpHILIC | Positive | 299.2002 | 0.38 | unknown | 485363   | 441055   | 781684   | 529837   | 215809    | 221928   | 414964   | 226973   | 328905   | 312338   | 426673   | 582933   | 483885   | 314062   | 291061   | 407687   | 462501   | 359730   | 151801   |
| fpHILIC | Negative | 245.0931 | 1.07 | unknown | 5153748  | 3281992  | 4144338  | 5108986  | 2877553   | 2911032  | 3388431  | 4017551  | 2158194  | 3823472  | 3468141  | 3175663  | 2664779  | 3624911  | 5685609  | 5368348  | 2998158  | 5243213  | 2906686  |
| EIC     | Negative | 383.1477 | 3.52 | unknown | 1030221  | 1006686  | 1226322  | 1022871  | 315734    | 532519   | 628800   | 467052   | 474711   | 557844   | 802828   | 1303889  | 1102279  | 640262   | 778413   | 870436   | 605998   | 625073   | 618861   |
| fpHILIC | Negative | 164.0386 | 2.96 | unknown | 2165568  | 1338649  | 2306873  | 918782   | 1794910   | 2576285  | 1734137  | 1709798  | 2343038  | 3052530  | 3035701  | 1748150  | 5628061  | 3638523  | 1794666  | 2536740  | 2349137  | 4376514  |          |
| fpHILIC | Positive | 149.0265 | 2.97 | unknown | 750258   | 640967   | 406668   | 198790   | 388524    | 538667   | 399919   | 397455   | 435645   | 279164   | 434681   | 470666   | 381793   | 1299216  | 997770   | 279836   | 504853   | 489607   | 854672   |
| fpHILIC | Positive | 166.0526 | 2.98 | unknown | 24710502 | 22171280 | 16290550 | 7041184  | 13576360  | 21062820 | 12701570 | 11101663 | 16263117 | 12703321 | 13518002 | 19487796 | 11918234 | 40846680 | 29325310 | 12631277 | 18923036 | 17865800 | 29430894 |
| fpHILIC | Positive | 90.0554  | 3.33 | unknown | 55668472 | 67962784 | 44409136 | 39852328 | 38119412  | 53567964 | 38800588 | 37774268 | 37454852 | 49223302 | 53441928 | 56729648 | 51167140 | 62142264 | 82118528 | 55359716 | 47366012 | 56257200 | 58662368 |
| EIC     | Negative | 364.2133 | 2.78 | unknown | 258400   | 134657   | 257947   | 80664    | 121434    | 190546   | 147862   | 199546   | 189128   | 186213   | 155335   | 164827   | 142649   | 141739   | 107848   | 126463   | 323663   | 330855   | 182494   |
| EIC     | Negative | 348.1904 | 2.46 | unknown | 822874   | 415115   | 963550   | 592756   | 233094    | 164423   | 410225   | 384185   | 237308   | 521448   | 305043   | 471700   | 412752   | 335253   | 422879   | 424413   | 339737   | 564541   | 320957   |
| fpHILIC | Positive | 105.0563 | 2.46 | unknown | 561395   | 538489   | 454267   | 178600   | 268760    | 427825   | 258762   | 236627   | 300707   | 277207   | 412039   | 362660   | 339749   | 666349   | 469256   | 339275   | 311553   | 393506   | 652415   |
| EIC     | Negative | 297.1863 | 5.49 | unknown | 1639192  | 651412   | 1960740  | 936956   | 768075    | 491758   | 735988   | 591468   | 613741   | 897329   | 921081   | 1028552  | 1278686  | 781082   | 734887   | 1256446  | 367992   | 1018710  | 1270128  |
| fpHILIC | Positive | 120.0900 | 2.70 | unknown | 667122   | 1087283  | 793044   | 582611   | 679726    | 829902   | 764536   | 531542   | 583458   | 842571   | 1044057  | 939742   | 794772   | 1159799  | 1414387  | 853849   | 821177   | 689571   | 1143711  |
| EIC     | Negative | 557.3835 | 4.07 | unknown | 62083    | 34063    | 129986   | 251634   | 44520     | 21199    | 61780    | 26564    | 70915    | 87383    | 57021    | 66558    | 76684    | 0        | 84280    | 73410    | 137914   | 31558    |          |
| fpHILIC | Negative | 577.3080 | 0.80 | unknown | 227677   | 216794   | 235054   | 109301   | 198573    | 173817   | 265877   | 176453   | 139318   | 148376   | 228165   | 223979   | 137484   | 187434   | 214357   | 0        | 259020   | 668386   | 245735   |
| EIC     | Negative | 277.1807 | 2.33 | unknown | 0        | 90144    | 171252   | 286583   | 33319     | 62463    | 44622    | 58727    | 36228    | 147948   | 140024   | 279465   | 95635    | 65078    | 82995    | 82960    | 92173    | 22090    | 62279    |
| fpHILIC | Positive | 134.1059 | 2.30 | unknown | 818616   | 799555   | 661071   | 568659   | 724140    | 843094   | 862895   | 172148   | 613866   | 481687   | 772636   | 777282   | 713335   | 972586   | 1809451  | 654824   | 581849   | 510671   | 114123   |
| EIC     | Negative | 406.1995 | 2.31 | unknown | 216505   | 415627   | 227722   | 305733   | 187521    | 250003   | 351946   | 243126   | 279621   | 855568   | 371939   | 572322   | 540403   | 417271   | 430838   | 379055   | 411017   | 362996   | 330410   |
| fpHILIC | Positive | 394.0711 | 2.97 | unknown | 295047   | 332601   | 525669   | 273880   | 207978    | 132529   | 179533   | 301293   | 262853   | 389917   | 263414   | 231592   | 218802   | 298180   | 342519   | 208691   | 323011   | 407007   | 298390   |
| EIC     | Negative | 359.2213 | 5.65 | unknown | 838855   | 595750   | 1000319  | 611420   | 489504    | 516442   | 580824   | 574349   | 521999   | 645974   | 880112   | 548538   | 707656   | 496513   | 505020   | 707755   | 748611   | 1114743  | 834100   |
| EIC     | Negative | 381.1467 | 2.31 | unknown | 963304   | 631784   | 837594   | 695884   | 222237    | 361851   | 474833   | 423150   | 426559   | 613446   | 528271   | 839167   | 688797   | 576875   | 625857   | 529294   | 565907   | 545991   | 514539   |
| EIC     | Negative | 508.2275 | 1.33 | unknown | 1210299  | 543161   | 296458   | 535102   | 433198    | 581492   | 0        | 323247   | 323247   | 715586   | 399158   | 570936   | 525520   | 543886   | 533988   | 735141   | 818858   | 0        | 497756   |
| EIC     | Negative | 371.1996 | 3.32 | unknown | 146145   | 62381    | 170887   | 238185   | 43064     | 52164    | 70404    | 97668    | 65512    | 127802   | 67803    | 85604    | 87259    | 59528    | 61470    | 124945   | 106439   | 128946   | 57874    |
| EIC     | Negative | 243.1601 | 3.46 | unknown | 57177    | 84746    | 84114    | 42542    | 78512     | 81271    | 47085    | 60758    | 42320    | 70400    | 52621    | 74027    | 67779    | 55423    | 70920    | 100885   | 50340    | 133901   | 96171    |
| EIC     | Negative | 411.1844 | 3.62 | unknown | 551267   | 418177   | 1032179  | 640888   | 182252    | 325027   | 487505   | 364086   | 261492   | 430982   | 498285   | 753417   | 843227   | 549684   | 261224   | 479742   | 512663   | 626552   | 490563   |
| fpHILIC | Negative | 74.0247  | 3.17 | unknown | 534545   | 926038   | 606094   | 470788   | 523236    | 689233   | 624266   | 510213   | 580800   | 505821   | 1224989  | 964115   | 1118443  | 1038094  | 1038094  | 975272   | 758283   | 606515   | 905617   |
| fpHILIC | Negative | 118.1029 | 1.64 | unknown | 1179071  | 36099700 | 17843088 | 18025330 | 127929318 | 0        | 23934602 | 13328595 | 29917450 | 18858536 | 26152116 | 26157310 | 23282960 | 23829958 | 31139520 | 30608575 | 21244700 | 18128276 | 19267592 |
| EIC     | Negative | 266.8039 | 0.52 | unknown | 2302886  | 561549   | 1794888  | 1195783  | 962931    | 935918   | 645241   | 680073   | 559793   | 3931659  | 557943   | 856764   | 638581   | 1435559  | 731918   | 1058860  | 462141   | 871394   | 2895362  |
| EIC     | Negative | 316.1633 | 3.49 | unknown | 58780    | 59565    | 72715    | 68667    | 24604     | 18970    | 24472    | 22222    | 13995    | 33035    | 30045    | 43088    | 31606    | 7454     | 36517    | 56508    | 26644    | 11855    | 209970   |
| EIC     | Negative | 343.0446 | 0.69 | unknown | 67109    | 138899   | 141058   | 102341   | 73802     | 74868    | 88020    | 116160   | 70163    | 84761    | 113240   | 117228   | 132033   | 63606    | 113159   | 127155   | 120957   | 181292   | 69669    |
| EIC     | Negative | 503.2845 | 4.93 | unknown | 3254720  | 6222376  | 3887451  | 0        | 6300551   | 0        | 5610891  | 0        | 0        | 0        | 4574587  | 0        | 3176987  | 0        | 4987060  | 0        | 4940611  | 3080177  | 4419638  |
| EIC     | Negative | 255.1444 | 2.67 | unknown | 4562135  | 7624035  | 4301495  | 5552380  | 4985860   | 534470   | 5131374  | 2978629  | 2399058  | 4057136  | 4220684  | 4483646  | 1367463  | 6233072  | 6300538  | 8769911  | 917664   | 3686337  | 3781391  |
| fpHILIC | Negative | 580.3256 | 0.60 | unknown | 57012828 | 62773876 | 65509536 | 48844288 | 0         | 58530432 | 54542788 | 44727256 | 48791196 | 63411580 | 0        | 54350132 | 67691784 | 52455724 | 0        | 53575556 | 5156     |          |          |

|         |          |          |      |         |           |           |           |           |           |           |           |           |           |           |           |           |           |           |           |           |           |          |           |
|---------|----------|----------|------|---------|-----------|-----------|-----------|-----------|-----------|-----------|-----------|-----------|-----------|-----------|-----------|-----------|-----------|-----------|-----------|-----------|-----------|----------|-----------|
| fpHILIC | Positive | 292.1486 | 2.70 | unknown | 514994    | 531969    | 637623    | 616807    | 426861    | 570625    | 313299    | 414777    | 214155    | 508332    | 593064    | 492806    | 433985    | 593695    | 687518    | 632032    | 386310    | 598821   | 579934    |
| EIC     | Negative | 300.2052 | 5.65 | unknown | 9028866   | 6472232   | 11325960  | 6888062   | 5543756   | 5622327   | 6286150   | 6757603   | 6190260   | 7114101   | 6851752   | 6560993   | 8667847   | 6004670   | 5667299   | 8582242   | 8796570   | 12325333 | 9843256   |
| EIC     | Negative | 259.6074 | 2.14 | unknown | 355931    | 976075    | 486003    | 52522     | 499285    | 619385    | 578990    | 523175    | 326434    | 273311    | 601527    | 6599907   | 4193805   | 1890613   | 1252535   | 700073    | 486557    | 1595354  | 7541625   |
| EIC     | Negative | 643.3464 | 3.27 | unknown | 292815    | 302343    | 171437    | 188460    | 135965    | 316919    | 152052    | 147520    | 309846    | 273448    | 245991    | 350743    | 257049    | 128475    | 234196    | 419304    | 386719    | 122860   | 418030    |
| fpHILIC | Negative | 91.0551  | 0.52 | unknown | 908954    | 659361    | 681430    | 148161    | 317428    | 676948    | 388124    | 203901    | 319885    | 571028    | 513185    | 631583    | 439426    | 1031649   | 936416    | 355927    | 423595    | 500623   | 620772    |
| fpHILIC | Positive | 393.1673 | 2.97 | unknown | 1719068   | 835989    | 1048659   | 529799    | 700050    | 676662    | 366105    | 1401733   | 832256    | 1335306   | 464577    | 548849    | 521528    | 2449447   | 1766739   | 469448    | 865862    | 1645948  | 1174000   |
| EIC     | Negative | 351.2179 | 1.79 | unknown | 1820465   | 762702    | 1361496   | 327824    | 262302    | 470547    | 484061    | 283994    | 381261    | 1768292   | 721691    | 885972    | 671779    | 713155    | 456515    | 818516    | 705691    | 0        | 824248    |
| EIC     | Negative | 306.1773 | 2.22 | unknown | 553690    | 302347    | 431178    | 407437    | 111934    | 165382    | 228178    | 199501    | 166944    | 320389    | 177704    | 380012    | 331767    | 237548    | 236793    | 293789    | 238777    | 318762   | 211559    |
| EIC     | Negative | 299.2019 | 5.65 | unknown | 41033974  | 29618836  | 53336445  | 31703879  | 25321600  | 25479531  | 28629071  | 30931264  | 26897608  | 33083752  | 31380743  | 29855725  | 39288400  | 27435060  | 25907008  | 39845383  | 40019635  | 55914068 | 44831466  |
| EIC     | Negative | 362.1978 | 3.76 | unknown | 522358    | 491968    | 1083930   | 498546    | 348285    | 230427    | 296511    | 233033    | 185961    | 286405    | 371890    | 321966    | 236120    | 219636    | 307203    | 437233    | 407635    | 558191   | 219450    |
| EIC     | Negative | 405.1922 | 2.31 | unknown | 914962    | 1609966   | 818161    | 1296335   | 786579    | 1053914   | 1366230   | 725400    | 1286294   | 1276754   | 1506050   | 2375536   | 2091688   | 1712656   | 1796061   | 1503550   | 1677801   | 1421179  | 1385887   |
| fpHILIC | Negative | 246.0969 | 1.07 | unknown | 689175    | 433470    | 593247    | 721954    | 396705    | 380891    | 453890    | 521345    | 282323    | 538828    | 473091    | 435724    | 326538    | 543637    | 751548    | 700277    | 456074    | 748681   | 379892    |
| EIC     | Negative | 316.1998 | 2.91 | unknown | 66505910  | 44173621  | 84795032  | 64701862  | 26376957  | 24018790  | 40899243  | 27085406  | 27744585  | 63389361  | 45382700  | 56570830  | 48826544  | 46707070  | 38361687  | 51501217  | 51276979  | 43852895 | 33158736  |
| EIC     | Negative | 313.1815 | 3.38 | unknown | 425761    | 1519172   | 1078373   | 1158284   | 1094539   | 352025    | 285420    | 511521    | 413252    | 412384    | 511506    | 448742    | 419382    | 607211    | 1098443   | 1703214   | 633432    | 287762   | 245167    |
| EIC     | Negative | 391.2134 | 2.05 | unknown | 6512031   | 3864239   | 7456786   | 4217550   | 2033329   | 2443378   | 2888960   | 1530501   | 1349595   | 4412344   | 2604405   | 2808485   | 2036997   | 2559098   | 2915848   | 4016836   | 2859463   | 2465237  | 3056613   |
| fpHILIC | Positive | 107.0534 | 3.61 | unknown | 684605    | 505476    | 565793    | 368711    | 366433    | 469232    | 388101    | 521438    | 439595    | 539202    | 452148    | 514622    | 451695    | 520962    | 819701    | 525921    | 489585    | 400106   | 609527    |
| EIC     | Negative | 303.1518 | 3.52 | unknown | 299940    | 266024    | 357578    | 322069    | 88164     | 148421    | 184517    | 137857    | 118140    | 179863    | 201035    | 383207    | 321540    | 200002    | 217688    | 250109    | 178243    | 211110   | 156008    |
| EIC     | Negative | 595.3458 | 2.36 | unknown | 1355594   | 800665    | 1146332   | 774377    | 377717    | 1035584   | 499401    | 173214    | 1336646   | 1336646   | 815412    | 1279859   | 668993    | 552313    | 801331    | 1111285   | 1033419   | 799240   | 1575259   |
| EIC     | Negative | 270.7981 | 0.52 | unknown | 2333292   | 630677    | 1961096   | 1251404   | 992306    | 995391    | 673044    | 559310    | 1072067   | 3457821   | 620108    | 483737    | 684221    | 1481895   | 695075    | 1132401   | 732100    | 853277   | 3071160   |
| EIC     | Positive | 315.1967 | 2.91 | unknown | 305203592 | 202280964 | 384623799 | 293705531 | 119500671 | 109388359 | 186701809 | 122551384 | 125670487 | 289042175 | 209664515 | 257723055 | 223467150 | 211930706 | 175028041 | 234140018 | 235001105 | 18987724 | 150042920 |
| EIC     | Negative | 311.1861 | 3.72 | unknown | 193297    | 116050    | 245235    | 131216    | 69311     | 109217    | 136347    | 77053     | 100953    | 1136660   | 148204    | 246171    | 235699    | 164797    | 101915    | 163861    | 160378    | 162031   | 150409    |
| EIC     | Negative | 516.2738 | 2.74 | unknown | 1050011   | 653133    | 951044    | 0         | 473000    | 965974    | 408927    | 0         | 683538    | 0         | 622669    | 726651    | 260825    | 547228    | 720540    | 798583    | 1207072   | 0        | 1071455   |
| EIC     | Negative | 411.1799 | 2.18 | unknown | 421839    | 530271    | 401187    | 636884    | 205206    | 359962    | 413941    | 366061    | 355516    | 622713    | 208178    | 726521    | 296576    | 289951    | 139462    | 672978    | 322469    | 962087   | 725861    |
| fpHILIC | Positive | 243.1031 | 1.64 | unknown | 0         | 533090    | 243842    | 324063    | 0         | 337695    | 161155    | 996123    | 255701    | 442527    | 418022    | 370040    | 326115    | 108100    | 486943    | 257288    | 236384    | 233981   |           |
| fpHILIC | Positive | 84.0814  | 5.24 | unknown | 5530722   | 7893586   | 7046519   | 4622084   | 5404844   | 6933182   | 5518727   | 3335459   | 4866953   | 5286650   | 7333780   | 9483593   | 7097356   | 7346557   | 10465010  | 8955888   | 6024316   | 5749705  | 7831831   |
| EIC     | Negative | 392.2169 | 2.06 | unknown | 1532473   | 861306    | 1882299   | 10612050  | 415030    | 5017125   | 652753    | 338377    | 366790    | 893593    | 579169    | 812824    | 627039    | 664945    | 700426    | 797677    | 660486    | 660813   | 593739    |
| EIC     | Negative | 345.1711 | 2.31 | unknown | 21195100  | 36357254  | 17303411  | 28953113  | 15739835  | 23588875  | 30514941  | 16940022  | 25858273  | 28681537  | 31191636  | 50689996  | 44399947  | 36568531  | 38951015  | 32894403  | 35157678  | 32608117 | 29665110  |
| EIC     | Negative | 376.2209 | 2.91 | unknown | 1858919   | 1197178   | 2173928   | 1830249   | 720538    | 710568    | 684149    | 745833    | 1793548   | 1793548   | 1201961   | 1562446   | 1329559   | 1228937   | 1010115   | 1426477   | 1333333   | 1287192  | 884226    |
| EIC     | Negative | 347.1869 | 2.46 | unknown | 3498304   | 1840765   | 3977461   | 2606614   | 1001089   | 975358    | 1898344   | 1407464   | 1025080   | 2049097   | 1355934   | 2123242   | 1805297   | 1525502   | 1861747   | 1936795   | 1503983   | 3386131  | 1462044   |
| fpHILIC | Negative | 74.0247  | 3.61 | unknown | 3029175   | 1613786   | 1867527   | 2352099   | 1088728   | 1372526   | 1209708   | 1422778   | 1236570   | 1767249   | 1435116   | 1758791   | 1377623   | 1337098   | 1930581   | 1996211   | 1656943   | 2363011  | 1577833   |
| fpHILIC | Negative | 117.0751 | 2.70 | unknown | 1724916   | 1950396   | 1534267   | 932664    | 1310483   | 1811285   | 1438577   | 948197    | 1096109   | 1266878   | 1677615   | 1790398   | 1468654   | 2428779   | 3073864   | 1672748   | 1466996   | 1378657  | 2348411   |
| EIC     | Negative | 285.0856 | 0.70 | unknown | 182926    | 469595    | 368253    | 327545    | 225805    | 227176    | 288010    | 456759    | 186614    | 203917    | 378655    | 404969    | 404419    | 155232    | 380734    | 416624    | 399754    | 727684   | 154683    |
| EIC     | Negative | 435.2030 | 1.14 | unknown | 46565     | 58167     | 44638     | 97287     | 26743     | 32746     | 48984     | 19769     | 56000     | 31324     | 48071     | 75332     | 83666     | 38380     | 50841     | 71353     | 78249     | 27597    | 49352     |
| EIC     | Negative | 356.1540 | 2.53 | unknown | 582576    | 305307    | 697990    | 482129    | 315749    | 417224    | 402774    | 471530    | 248568    | 717617    | 456320    | 553873    | 503907    | 618711    | 625412    | 512260    | 605816    | 566219   | 483531    |
| EIC     | Negative | 315.1602 | 3.36 | unknown | 469816    | 601169    | 438873    | 465149    | 265245    | 319783    | 276887    | 420401    | 317124    | 276487    | 350084    | 635704    | 595721    | 430095    | 594084    | 635517    | 431068    | 382027   | 365188    |
| fpHILIC | Negative | 180.0336 | 0.56 | unknown | 507612    | 277313    | 454060    | 397529    | 340899    | 479406    | 374981    | 199059    | 429953    | 180182    | 367547    | 384653    | 525537    | 358825    | 304449    | 731341    | 461041    | 739846   | 151556    |
| EIC     | Negative | 251.1269 | 2.75 | unknown | 96467     | 298478    | 43352     | 507956    | 242103    | 100867    | 76796     | 0         | 42853     | 180182    | 367547    | 384653    | 525537    | 358825    | 304449    | 731341    | 461041    | 739846   | 151556    |
| EIC     | Negative | 346.1742 | 2.31 | unknown | 4601210   | 8149260   | 3665425   | 6571831   | 3488000   | 5218125   | 3688931   | 5653912   | 6624321   | 6919884   | 11163866  | 9896708   | 8136190   | 8526691   | 7298988   | 7782460   | 7208288   | 6661020  |           |
| fpHILIC | Positive | 346.1540 | 2.61 | unknown | 688486    | 623890    | 564233    | 452816    | 504150    | 610825    | 451417    | 504515    | 610825    | 358161    | 658937    | 395867    | 692515    | 615587    | 455457    | 515686    | 596991    | 669610   |           |
| EIC     | Negative | 334.2108 | 2.81 | unknown | 324377    | 244526    | 608054    | 241531    | 175527    | 201268    | 330212    | 183994    | 197519    | 627174    | 306131    | 314694    | 305931    | 268988    | 260770    | 279704    | 371207    | 396027   | 343911    |
| EIC     | Negative | 311.1657 | 3.47 | unknown | 98669     | 111435    | 156674    | 169710    | 65442     | 86194     | 62774     | 83540     | 123236    | 83121     | 39450     | 115236    | 98129     | 122392    | 98902     | 70216     | 95512     |          |           |
| EIC     | Negative | 388.7124 | 0.52 | unknown | 487399    | 145363    | 574361    | 296678    | 223558    | 274300    | 123652    | 28337     | 305161    | 774284    | 106907    | 95695     | 144450    | 226438    | 151295    | 295274    | 118171    | 226052   | 652886    |
| fpHILIC | Negative | 147.0493 | 3.66 | unknown | 1553566   | 844769    | 722765    | 841154    | 536450    | 1018369   | 494737    | 607622    | 762194    | 483185    | 792032    | 624460    | 613185    | 837729    | 1009252   | 1048281   | 1276542   | 825610   |           |
| EIC     | Negative | 594.3426 | 3.00 | unknown | 4230798   | 2922281   | 3168885   | 2143428   | 1246225   | 3882251   | 1640409   | 2630442   | 2668346   | 3858636   | 3010371   | 4516623   | 2665642   | 2059635   | 2921130   | 3992040   | 3631008   | 2109461  | 5600025   |
| EIC     | Negative | 316.1999 | 2.26 | unknown | 0         | 270813    | 0         | 318806    | 299246    | 281928    | 0         | 0         | 0         | 0         | 353853    | 385843    | 146503    | 349417    | 0         | 322941    | 0         | 207307   |           |
| fpHILIC | Negative | 146.0459 | 3.67 | unknown | 28093212  | 13839049  | 12876397  | 14339232  | 9528889   | 17244656  | 9499051   | 11109562  | 11271459  | 14261254  | 8448241   | 14964627  | 11139966  | 11495973  | 15195157  | 17870262  | 18641996  | 22417784 | 14720120  |
| fpHILIC | Positive | 87.1003  | 2.31 | unknown | 757829    | 1049626   | 610001    | 231107    | 674872    | 719052    | 563930    | 0         | 524053    | 524285    | 166162    | 918562    | 665418    | 888540    | 1701738   | 648939    | 451634    | 177815   | 785302    |
| EIC     | Negative | 395.1897 | 5.65 | unknown | 1489391   | 1109253   | 1983105   | 1106558   | 963683    | 9         |           |           |           |           |           |           |           |           |           |           |           |          |           |

|         |          |          |      |         |          |          |          |          |          |          |          |          |          |          |          |          |          |          |          |          |          |          |          |
|---------|----------|----------|------|---------|----------|----------|----------|----------|----------|----------|----------|----------|----------|----------|----------|----------|----------|----------|----------|----------|----------|----------|----------|
| EIC     | Negative | 384.7182 | 0.52 | unknown | 959013   | 218263   | 1090168  | 641837   | 337434   | 506364   | 315798   | 112144   | 505036   | 1534107  | 258272   | 261375   | 317869   | 290531   | 303266   | 541474   | 170600   | 458417   | 1266033  |
| EIC     | Negative | 397.1322 | 3.52 | unknown | 322527   | 320571   | 391214   | 318792   | 91709    | 168114   | 190256   | 133342   | 142099   | 175810   | 238484   | 433173   | 359800   | 197503   | 248228   | 284021   | 197772   | 197307   | 193049   |
| EIC     | Negative | 327.2545 | 5.91 | unknown | 381162   | 187798   | 676872   | 419080   | 87727    | 192845   | 91837    | 150870   | 187889   | 168116   | 154412   | 397035   | 346255   | 170036   | 318341   | 246286   | 260628   | 341861   | 101233   |
| fpHILIC | Negative | 222.0772 | 1.66 | unknown | 0        | 3111345  | 4623249  | 5104309  | 1692394  | 2867389  | 1549584  | 3241383  | 1206213  | 5440330  | 1778183  | 1630095  | 1636285  | 3198443  | 4271205  | 2323171  | 2349419  | 5247539  | 2128823  |
| fpHILIC | Negative | 328.7566 | 0.52 | unknown | 1250012  | 330969   | 916227   | 927489   | 431900   | 670591   | 422608   | 201112   | 516204   | 1961005  | 398309   | 313002   | 494886   | 496640   | 401991   | 482423   | 298728   | 298728   | 1656853  |
| EIC     | Negative | 301.2082 | 5.65 | unknown | 1106013  | 804885   | 1400539  | 821287   | 647476   | 690456   | 755076   | 785038   | 731540   | 874311   | 842272   | 767671   | 1026436  | 665088   | 704001   | 1055519  | 1133711  | 1506620  | 1187288  |
| EIC     | Negative | 478.2942 | 4.47 | unknown | 0        | 4271364  | 0        | 0        | 0        | 0        | 0        | 0        | 2260376  | 0        | 0        | 0        | 0        | 0        | 0        | 0        | 0        | 3499686  | 0        |
| fpHILIC | Negative | 88.0405  | 3.35 | unknown | 13390293 | 14754238 | 9503386  | 6698962  | 8741776  | 12033700 | 8270515  | 6776288  | 9334667  | 9056281  | 10723665 | 12722251 | 11135240 | 14702920 | 19016698 | 14435862 | 10645272 | 13999637 | 11852456 |
| fpHILIC | Positive | 168.0487 | 2.97 | unknown | 1067044  | 1106046  | 910003   | 359574   | 649975   | 974130   | 534156   | 432327   | 708462   | 640623   | 721075   | 832365   | 494337   | 1690789  | 1378713  | 688389   | 844491   | 834878   | 1366623  |
| fpHILIC | Negative | 345.1717 | 0.43 | unknown | 2099654  | 2163273  | 2234216  | 2380885  | 948853   | 1348540  | 1492750  | 985430   | 1443236  | 1400261  | 1771266  | 2799886  | 2968080  | 1825513  | 1945434  | 1821123  | 2196617  | 1897181  | 1791543  |
| EIC     | Negative | 302.1481 | 3.52 | unknown | 2278188  | 1998559  | 2666157  | 2134726  | 616798   | 1114465  | 1277521  | 891626   | 897467   | 1187389  | 1570924  | 2885567  | 2338914  | 1358316  | 1635099  | 1843711  | 1368570  | 1344437  | 1255523  |
| fpHILIC | Positive | 121.0644 | 2.95 | unknown | 473385   | 375833   | 492411   | 327600   | 284472   | 305073   | 212667   | 295149   | 340067   | 354359   | 268421   | 318310   | 336041   | 314262   | 477988   | 340192   | 423462   | 637119   | 355358   |
| fpHILIC | Negative | 142.0510 | 1.66 | unknown | 0        | 997823   | 725531   | 614364   | 827316   | 0        | 834080   | 495814   | 438214   | 604805   | 1132045  | 1052293  | 747819   | 1186795  | 901503   | 1087300  | 624155   | 665775   | 756394   |
| fpHILIC | Negative | 219.1068 | 1.64 | unknown | 0        | 3796944  | 1845689  | 1909446  | 1612076  | 0        | 1989452  | 1467439  | 2951579  | 1899377  | 2897564  | 2815153  | 2239618  | 2326998  | 3101475  | 3566888  | 2125063  | 1836008  | 1865776  |
| fpHILIC | Positive | 133.1049 | 2.30 | unknown | 14245406 | 13383800 | 11020977 | 6252206  | 9255211  | 13513545 | 10759890 | 4267698  | 11059766 | 9043719  | 14171335 | 13076236 | 10877273 | 19419616 | 31219054 | 11916366 | 10041112 | 6989872  | 15919696 |
| EIC     | Negative | 585.4164 | 3.76 | unknown | 63772    | 29998    | 176983   | 119789   | 0        | 29859    | 35851    | 46830    | 10724    | 151383   | 31571    | 36010    | 18281    | 16931    | 11003    | 19528    | 36436    | 66550    | 58539    |
| fpHILIC | Positive | 308.1141 | 3.18 | unknown | 634696   | 751802   | 477982   | 472165   | 439470   | 550557   | 445950   | 398054   | 499465   | 471281   | 722749   | 788638   | 709297   | 856165   | 910745   | 684612   | 639607   | 512355   | 891034   |
| EIC     | Negative | 642.3422 | 3.02 | unknown | 814548   | 1464270  | 547539   | 852465   | 635820   | 1243727  | 722609   | 511826   | 1203362  | 979063   | 1264546  | 1560115  | 1335864  | 858266   | 1152663  | 1831848  | 1457373  | 568432   | 1704146  |
| EIC     | Negative | 236.0651 | 0.47 | unknown | 114965   | 65023    | 84728    | 64274    | 32343    | 60746    | 32894    | 31129    | 57963    | 9871     | 35874    | 76660    | 50250    | 60133    | 73596    | 66261    | 34522    | 86848    | 74396    |
| EIC     | Negative | 275.1656 | 2.55 | unknown | 1182164  | 632953   | 1081043  | 945793   | 346959   | 348115   | 558568   | 569557   | 336405   | 638706   | 669531   | 875413   | 901244   | 548800   | 634896   | 644087   | 759346   | 665609   | 666527   |
| EIC     | Negative | 313.1197 | 1.69 | unknown | 763626   | 556394   | 506252   | 1051816  | 454877   | 324536   | 481955   | 607134   | 385764   | 864601   | 594925   | 691711   | 633959   | 397156   | 407140   | 831366   | 646459   | 1257812  | 384082   |
| EIC     | Negative | 495.1973 | 2.24 | unknown | 414634   | 104062   | 367900   | 627900   | 316771   | 46279    | 29693    | 71804    | 194013   | 626673   | 47115    | 95685    | 59663    | 75685    | 59703    | 68220    | 68215    | 344922   | 81105    |
| EIC     | Negative | 329.1761 | 3.30 | unknown | 768123   | 438561   | 1092974  | 730888   | 217200   | 351057   | 424648   | 377811   | 244589   | 596800   | 562275   | 760995   | 898215   | 509174   | 379681   | 497580   | 557115   | 618045   | 475506   |
| EIC     | Negative | 562.3144 | 2.30 | unknown | 180211   | 0        | 1168110  | 923113   | 0        | 0        | 0        | 493577   | 0        | 701554   | 0        | 0        | 0        | 0        | 0        | 0        | 0        | 773014   | 0        |
| EIC     | Negative | 397.2001 | 4.03 | unknown | 1020648  | 477328   | 1745215  | 883345   | 317223   | 405492   | 623779   | 548890   | 584292   | 759903   | 606487   | 644609   | 863141   | 562003   | 299619   | 673380   | 712918   | 823387   | 1323938  |
| fpHILIC | Positive | 151.0615 | 2.46 | unknown | 16125790 | 17418898 | 13467339 | 7027089  | 8575195  | 14006917 | 9295621  | 8945233  | 9506387  | 9871456  | 1253959  | 14714678 | 11341183 | 24229104 | 18735154 | 11448090 | 12776681 | 14922112 | 21266850 |
| EIC     | Negative | 379.1946 | 2.07 | unknown | 431509   | 268360   | 632805   | 1681378  | 65540    | 75651    | 140655   | 61925    | 112912   | 898396   | 402994   | 107998   | 0        | 130849   | 256643   | 33432    | 230485   | 66773    | 0        |
| EIC     | Negative | 446.6708 | 0.52 | unknown | 557003   | 101725   | 720351   | 208275   | 256926   | 146125   | 0        | 310873   | 0        | 875985   | 130657   | 110863   | 166540   | 93404    | 98522    | 278033   | 95700    | 224712   | 754416   |
| EIC     | Negative | 512.2689 | 1.26 | unknown | 1021202  | 33913    | 9189348  | 5384922  | 88752    | 53184    | 45588    | 9816737  | 128044   | 840795   | 89858    | 50476    | 57084    | 137340   | 133170   | 75450    | 74770    | 15592876 | 80533    |
| EIC     | Negative | 313.1196 | 1.84 | unknown | 3861145  | 2062800  | 983843   | 84318    | 1858301  | 453828   | 1773845  | 553342   | 1426044  | 304197   | 2592231  | 2774187  | 2552387  | 471000   | 1504715  | 3862742  | 2624944  | 0        | 1532898  |
| fpHILIC | Negative | 206.0821 | 0.74 | unknown | 1721701  | 714152   | 952486   | 700048   | 492412   | 969215   | 511573   | 538528   | 552975   | 937179   | 788548   | 932254   | 621046   | 1291936  | 1723331  | 889013   | 643899   | 939084   | 635450   |
| EIC     | Negative | 367.2439 | 6.39 | unknown | 5150994  | 2400854  | 6449790  | 0        | 1592782  | 3645664  | 1707454  | 503106   | 0        | 3973069  | 3146991  | 2707873  | 1336298  | 3626454  | 3317328  | 1873800  | 3306120  | 1666877  | 1577708  |
| EIC     | Negative | 347.1869 | 2.17 | unknown | 1453395  | 1167655  | 1261366  | 1151945  | 302601   | 577889   | 624913   | 421916   | 448976   | 1210717  | 364358   | 1015113  | 711199   | 690165   | 502809   | 816167   | 588348   | 1032585  | 806194   |
| fpHILIC | Positive | 117.0659 | 3.12 | unknown | 1968669  | 1711819  | 2265795  | 2977909  | 1159329  | 1578295  | 1911683  | 1740821  | 1278644  | 2569811  | 1759956  | 1575659  | 2132812  | 1712391  | 1580207  | 2621338  | 2615456  | 2995290  | 2281800  |
| fpHILIC | Negative | 135.0273 | 2.46 | unknown | 1922248  | 1987569  | 1596364  | 785665   | 988385   | 1394121  | 987891   | 1121061  | 1438559  | 1121061  | 1491411  | 1680150  | 1141440  | 2751645  | 2062520  | 1021274  | 1251506  | 1529703  | 2520013  |
| EIC     | Negative | 507.2243 | 0.91 | unknown | 103190   | 51870    | 89491    | 35799    | 18691    | 23408    | 67104    | 27771    | 43082    | 69193    | 37072    | 64918    | 49368    | 49275    | 50279    | 67986    | 80086    | 39698    | 46111    |
| fpHILIC | Negative | 207.0858 | 0.58 | unknown | 1507053  | 850993   | 996491   | 522613   | 365907   | 1275137  | 612687   | 665284   | 960324   | 1026682  | 995565   | 833439   | 1384349  | 1613703  | 1026875  | 655888   | 1192467  | 931130   | 0        |
| fpHILIC | Positive | 150.0481 | 2.46 | unknown | 2425476  | 2267209  | 1987422  | 963678   | 971993   | 2007156  | 1452256  | 1001336  | 1435995  | 1257171  | 1836320  | 2221220  | 1590581  | 3558360  | 2677564  | 1621701  | 1592966  | 2167538  | 2786830  |
| EIC     | Negative | 336.2266 | 2.06 | unknown | 677170   | 233131   | 779399   | 397172   | 100827   | 141391   | 167804   | 148329   | 903821   | 232364   | 254769   | 338237   | 323674   | 193213   | 237171   | 323674   | 338237   | 217966   | 312271   |
| EIC     | Negative | 492.2743 | 3.15 | unknown | 614278   | 273631   | 465153   | 245470   | 119956   | 388449   | 127511   | 292203   | 184998   | 420997   | 235737   | 329607   | 184703   | 282096   | 346189   | 191430   | 357641   | 315228   | 549582   |
| fpHILIC | Positive | 388.1803 | 3.54 | unknown | 126163   | 2601891  | 1443698  | 173542   | 413855   | 235895   | 926436   | 513855   | 419234   | 47983    | 241347   | 202081   | 1957953  | 192240   | 156111   | 523468   | 216246   | 4542514  | 0        |
| EIC     | Negative | 258.1799 | 3.23 | unknown | 121400   | 74654    | 151697   | 136413   | 37923    | 51506    | 74692    | 61808    | 44396    | 97646    | 62071    | 114104   | 115067   | 63703    | 91580    | 92438    | 75632    | 102638   | 66154    |
| EIC     | Negative | 362.2373 | 3.50 | unknown | 575771   | 0        | 481185   | 0        | 0        | 345732   | 553806   | 0        | 0        | 388721   | 494553   | 614576   | 44842    | 0        | 485504   | 0        | 743861   | 196341   |          |
| EIC     | Negative | 643.3459 | 3.01 | unknown | 277861   | 517997   | 172937   | 277795   | 221147   | 441885   | 232914   | 199804   | 417778   | 356878   | 440759   | 550650   | 475563   | 314878   | 415401   | 635893   | 528934   | 224100   | 594626   |
| EIC     | Negative | 491.4381 | 3.82 | unknown | 715531   | 576043   | 816682   | 326013   | 416248   | 403092   | 402033   | 416248   | 403092   | 395012   | 614759   | 758470   | 593278   | 867103   | 717923   | 565991   | 569520   | 719188   | 361476   |
| EIC     | Negative | 261.0411 | 0.69 | unknown | 309284   | 575262   | 513350   | 343379   | 284211   | 302763   | 330916   | 323257   | 247546   | 370062   | 438139   | 446769   | 488095   | 344020   | 472235   | 553806   | 421492   | 596097   | 316935   |
| EIC     | Negative | 263.0378 | 0.69 | unknown | 102424   | 180622   | 160702   | 109943   | 89386    | 97649    | 109419   | 100349   | 85254    | 114141   | 142634   | 142058   | 167080   | 111720   | 157748   | 180912   | 132080   | 190896   | 102914   |
| fpHILIC | Positive | 133.0314 | 2.46 | unknown | 41567892 | 42036852 | 34255160 | 16582389 | 21207120 | 34208232 | 23639334 | 20236146 | 23181256 | 23986258 | 32374096 | 37427686 | 28741206 | 59253740 | 45145188 | 26905014 | 28887524 | 34938064 | 58540068 |
| EIC     | Negative | 327.1605 | 4.23 | unknown | 527448   | 725410   | 612282   | 867485   | 276720   | 278367   | 337410</ |          |          |          |          |          |          |          |          |          |          |          |          |

|         |          |          |      |         |          |          |          |          |         |         |          |          |          |          |          |          |          |          |          |          |          |          |          |
|---------|----------|----------|------|---------|----------|----------|----------|----------|---------|---------|----------|----------|----------|----------|----------|----------|----------|----------|----------|----------|----------|----------|----------|
| fpHILIC | Positive | 153.0567 | 2.46 | unknown | 812444   | 840836   | 643140   | 334156   | 481609  | 668183  | 461161   | 437342   | 494442   | 504704   | 596830   | 757584   | 576437   | 1323984  | 1022791  | 665235   | 651460   | 721630   | 1054752  |
| EIC     | Negative | 491.3379 | 2.99 | unknown | 1590198  | 1689786  | 1612088  | 1201103  | 887744  | 1168696 | 1063485  | 1020122  | 903609   | 2438156  | 1643418  | 1888719  | 1159125  | 1100794  | 2515157  | 2188184  | 1103932  | 1519900  | 843456   |
| EIC     | Negative | 492.3419 | 2.99 | unknown | 523294   | 540317   | 529405   | 371977   | 317825  | 403470  | 350585   | 1020122  | 903609   | 772408   | 540199   | 583857   | 373252   | 367606   | 815214   | 709095   | 399465   | 473824   | 282385   |
| EIC     | Negative | 291.0700 | 2.85 | unknown | 8453470  | 10213803 | 9900042  | 2876951  | 7107255 | 6434407 | 9402505  | 6198033  | 2721048  | 8747647  | 11962118 | 10683457 | 7486333  | 16455828 | 15135460 | 5721777  | 7020670  | 8314395  | 15148763 |
| EIC     | Negative | 318.2063 | 2.91 | unknown | 973957   | 617316   | 1137629  | 788566   | 330954  | 279570  | 498887   | 328115   | 363069   | 850153   | 511712   | 778648   | 631589   | 718352   | 470501   | 680673   | 687945   | 622746   | 452002   |
| EIC     | Negative | 292.0732 | 2.85 | unknown | 1413126  | 1795724  | 1629051  | 495512   | 1216820 | 1212594 | 1640082  | 1003311  | 477885   | 1500663  | 2045657  | 1818068  | 1265135  | 2786464  | 2587586  | 982291   | 1208345  | 1413133  | 2597740  |
| EIC     | Negative | 282.0733 | 4.35 | unknown | 260992   | 64075    | 165622   | 748419   | 47182   | 59029   | 69251    | 105255   | 178642   | 198878   | 150367   | 218651   | 164853   | 0        | 66455    | 236819   | 119004   | 283046   | 40363    |
| fpHILIC | Positive | 312.1102 | 2.50 | unknown | 570093   | 661868   | 492071   | 273472   | 284288  | 550660  | 436390   | 372116   | 341880   | 472766   | 460049   | 501901   | 409283   | 922870   | 789824   | 368509   | 520089   | 674912   | 870226   |
| EIC     | Negative | 413.1739 | 2.91 | unknown | 1220367  | 1054777  | 1543953  | 1844396  | 939703  | 963109  | 1710501  | 1160645  | 1329647  | 2390686  | 1934268  | 2411444  | 2168216  | 2100337  | 1718498  | 2334814  | 2297355  | 1978436  | 1582124  |
| EIC     | Negative | 639.4113 | 3.82 | unknown | 470391   | 0        | 504476   | 418334   | 12095   | 0       | 392085   | 0        | 514589   | 35224    | 27039    | 0        | 0        | 0        | 0        | 19083    | 0        | 637238   | 0        |
| EIC     | Negative | 319.1219 | 2.38 | unknown | 161776   | 51722    | 96657    | 26803    | 33074   | 61250   | 23181    | 41998    | 33879    | 83020    | 46011    | 56539    | 49312    | 115849   | 89880    | 35410    | 61255    | 61030    | 66615    |
| EIC     | Negative | 375.1200 | 1.11 | unknown | 39086    | 23446    | 41280    | 67236    | 25696   | 13038   | 25393    | 41674    | 17680    | 20360    | 34257    | 42696    | 58375    | 19177    | 26345    | 54167    | 36944    | 61517    | 21928    |
| EIC     | Negative | 314.1230 | 1.85 | unknown | 594592   | 317394   | 146837   | 0        | 275393  | 172029  | 266901   | 0        | 223685   | 0        | 425914   | 422476   | 418271   | 248865   | 248046   | 611649   | 416186   | 0        | 250620   |
| fpHILIC | Positive | 389.1837 | 3.54 | unknown | 0        | 452263   | 225847   | 0        | 33220   | 145188  | 48568    | 309320   | 0        | 561897   | 0        | 0        | 0        | 347992   | 0        | 60194    | 107645   | 0        | 705309   |
| EIC     | Negative | 414.1808 | 2.91 | unknown | 237603   | 215002   | 345318   | 410772   | 205071  | 186366  | 375806   | 288314   | 275841   | 150324   | 470728   | 544163   | 464795   | 458549   | 402016   | 496787   | 497201   | 406828   | 367710   |
| EIC     | Negative | 323.1058 | 1.08 | unknown | 57575    | 50407    | 144655   | 74494    | 17899   | 60895   | 70200    | 107064   | 54025    | 150324   | 72210    | 67232    | 161288   | 114561   | 106131   | 73998    | 116047   | 167898   | 129771   |
| EIC     | Negative | 348.1907 | 1.38 | unknown | 493195   | 396910   | 0        | 131124   | 242657  | 250182  | 0        | 137593   | 0        | 329090   | 437366   | 386233   | 294554   | 310113   | 430054   | 270555   | 0        | 259238   | 0        |
| EIC     | Negative | 332.1952 | 2.24 | unknown | 12801968 | 4605775  | 13261539 | 7757880  | 1996767 | 1904714 | 4089429  | 3426634  | 2318384  | 8848340  | 3840937  | 5835300  | 5364093  | 4146316  | 3734459  | 4170788  | 2524834  | 8155786  | 2863105  |
| EIC     | Negative | 302.1841 | 2.63 | unknown | 208001   | 220364   | 552072   | 287755   | 138421  | 200653  | 272972   | 0        | 110383   | 261560   | 253501   | 431873   | 337071   | 300603   | 260584   | 322564   | 347392   | 73037    | 177285   |
| EIC     | Negative | 483.2725 | 6.19 | unknown | 2098376  | 2858716  | 2446926  | 2010470  | 2268764 | 1598948 | 1949249  | 2273202  | 716719   | 1919679  | 2994662  | 2372633  | 1658626  | 4153109  | 4191456  | 1313955  | 2480147  | 3359680  | 3159293  |
| fpHILIC | Negative | 250.0929 | 3.17 | unknown | 299327   | 536849   | 397021   | 276155   | 224913  | 406943  | 393206   | 226149   | 269951   | 484205   | 375764   | 368970   | 391546   | 380636   | 702451   | 443884   | 437340   | 449262   | 459103   |
| EIC     | Negative | 595.3822 | 4.13 | unknown | 359578   | 171840   | 245027   | 353301   | 203585  | 142546  | 101256   | 749150   | 164781   | 872785   | 710703   | 264932   | 231083   | 321931   | 4702712  | 2117581  | 518091   | 793813   | 319379   |
| fpHILIC | Negative | 263.1138 | 0.95 | unknown | 1819144  | 905301   | 2199687  | 720237   | 709435  | 1826762 | 1013222  | 1655550  | 675705   | 1361400  | 1407178  | 2222267  | 1427479  | 1354699  | 382453   | 2331483  | 452929   | 1293700  | 581090   |
| EIC     | Negative | 330.1794 | 3.12 | unknown | 738218   | 858749   | 581626   | 755147   | 266333  | 903204  | 393855   | 176583   | 337999   | 532521   | 821435   | 1302687  | 1329282  | 808084   | 929833   | 655609   | 171257   | 449779   | 656756   |
| fpHILIC | Positive | 134.0349 | 2.46 | unknown | 2052056  | 2291992  | 1690819  | 942003   | 1068430 | 1870734 | 1187547  | 958852   | 1253033  | 1359670  | 1680310  | 1776904  | 1371508  | 3099548  | 2633093  | 1501983  | 1489162  | 1721046  | 3089916  |
| EIC     | Negative | 329.1761 | 3.24 | unknown | 417483   | 630202   | 565259   | 892121   | 168784  | 132479  | 140597   | 265826   | 93028    | 360748   | 278878   | 209318   | 182240   | 100564   | 303143   | 433740   | 170007   | 157054   | 252471   |
| fpHILIC | Negative | 438.2166 | 1.64 | unknown | 0        | 622207   | 217581   | 241380   | 263767  | 0       | 193987   | 126829   | 486363   | 226722   | 442790   | 432214   | 322476   | 346392   | 621105   | 532336   | 265273   | 155415   | 186829   |
| fpHILIC | Negative | 329.2324 | 0.48 | unknown | 711523   | 190838   | 602973   | 111458   | 139786  | 434674  | 366871   | 158849   | 345248   | 398972   | 120382   | 281669   | 202361   | 262475   | 107611   | 1219164  | 307551   | 416193   | 326598   |
| EIC     | Negative | 492.3425 | 3.82 | unknown | 217318   | 181650   | 224453   | 98203    | 121890  | 132206  | 125685   | 119689   | 88578    | 278429   | 202183   | 247986   | 184788   | 276689   | 324243   | 181639   | 192812   | 237014   | 123505   |
| EIC     | Negative | 331.1919 | 2.24 | unknown | 57488586 | 20796503 | 60682694 | 34192863 | 8924176 | 8507416 | 18379029 | 15122975 | 10362656 | 39721957 | 17431980 | 26393464 | 23815838 | 18585788 | 16884552 | 18589865 | 15826769 | 36629970 | 12908238 |
| EIC     | Negative | 273.2074 | 2.43 | unknown | 101296   | 33303    | 139301   | 91163    | 57198   | 61309   | 27236    | 100186   | 24663    | 101502   | 33586    | 33746    | 32999    | 22813    | 38800    | 223591   | 46576    | 107686   | 29629    |
| EIC     | Negative | 374.1442 | 1.82 | unknown | 196496   | 86186    | 152366   | 0        | 100080  | 48212   | 52308    | 0        | 52955    | 0        | 100969   | 117684   | 107013   | 47357    | 74619    | 157015   | 106883   | 0        | 79857    |
| EIC     | Negative | 594.3424 | 2.27 | unknown | 481929   | 377774   | 482696   | 343854   | 213477  | 487466  | 237818   | 364480   | 405101   | 609797   | 419914   | 623942   | 309244   | 292041   | 411258   | 675005   | 521083   | 362188   | 852726   |
| EIC     | Negative | 313.1816 | 3.61 | unknown | 346057   | 357841   | 932549   | 1250208  | 203180  | 152158  | 288411   | 316328   | 321752   | 275420   | 224956   | 293269   | 303466   | 209713   | 142585   | 288827   | 276834   | 263322   | 1149626  |
| fpHILIC | Positive | 291.0695 | 0.37 | unknown | 6067893  | 3939994  | 9044914  | 3373955  | 2645363 | 2423552 | 3858733  | 4255118  | 1627502  | 5118732  | 4422731  | 4708580  | 3336328  | 5858170  | 5720192  | 16217023 | 2909359  | 6982773  | 6729107  |
| EIC     | Negative | 500.6353 | 0.52 | unknown | 692497   | 122373   | 820668   | 452223   | 214648  | 354358  | 150820   | 0        | 470568   | 1183343  | 149780   | 142887   | 203866   | 0        | 135320   | 338886   | 102613   | 301162   | 916129   |
| fpHILIC | Positive | 152.0622 | 2.46 | unknown | 1099288  | 1099422  | 951578   | 437273   | 617791  | 876121  | 621160   | 629947   | 621600   | 9391547  | 1017900  | 805154   | 1659321  | 1378839  | 839669   | 838673   | 964671   | 169189   | 0        |
| EIC     | Negative | 347.1869 | 1.38 | unknown | 1841990  | 1821449  | 0        | 608851   | 1085443 | 1114596 | 0        | 618953   | 0        | 1525180  | 2032555  | 1714600  | 1323432  | 1462495  | 1812992  | 1273132  | 0        | 1138253  | 0        |
| EIC     | Negative | 371.2017 | 2.52 | unknown | 497358   | 217640   | 422670   | 397739   | 113981  | 110956  | 111278   | 485328   | 205797   | 282512   | 202720   | 242804   | 228944   | 161634   | 209712   | 289122   | 215972   | 270217   | 202075   |
| EIC     | Negative | 427.1796 | 2.46 | unknown | 375812   | 150615   | 358182   | 437236   | 57557   | 110366  | 113799   | 86836    | 82799    | 545814   | 184497   | 201217   | 213175   | 168841   | 168550   | 151188   | 173108   | 67849    | 188484   |
| EIC     | Negative | 409.1691 | 2.88 | unknown | 405241   | 389316   | 397183   | 426798   | 182986  | 138599  | 239775   | 310179   | 204598   | 285923   | 268324   | 265012   | 308045   | 263628   | 383217   | 308045   | 263628   | 383217   | 254318   |
| EIC     | Negative | 328.2574 | 5.91 | unknown | 97890    | 46042    | 132543   | 83771    | 23579   | 43165   | 37896    | 18450    | 65980    | 39758    | 40210    | 81593    | 70388    | 37874    | 61197    | 56114    | 71215    | 83408    | 41907    |
| EIC     | Negative | 370.0164 | 0.50 | unknown | 418761   | 221858   | 208414   | 274037   | 130998  | 135082  | 138103   | 139102   | 318988   | 148437   | 179517   | 127637   | 48827    | 142715   | 330593   | 274027   | 197397   | 240030   | 0        |
| EIC     | Negative | 353.1669 | 0.85 | unknown | 51672    | 41794    | 507703   | 16444    | 40847   | 58479   | 89074    | 49220    | 73851    | 120975   | 72349    | 101536   | 74176    | 109494   | 115700   | 26558    | 309975   | 41982    | 23867    |
| EIC     | Negative | 316.1999 | 4.02 | unknown | 3523306  | 1617225  | 7088185  | 4045862  | 1017640 | 1346772 | 2245407  | 2058955  | 1684573  | 2746849  | 2186417  | 2554277  | 3392531  | 1987689  | 958659   | 2648734  | 2584251  | 3189978  | 4738687  |
| fpHILIC | Negative | 311.1122 | 2.43 | unknown | 589040   | 987082   | 488722   | 391174   | 533563  | 661491  | 700499   | 624749   | 714417   | 637258   | 1385532  | 1464207  | 735661   | 1446732  | 1027690  | 1273300  | 652342   | 860266   | 1568999  |
| EIC     | Negative | 392.1070 | 0.47 | unknown | 526273   | 791178   | 460496   | 309804   | 282930  | 625715  | 356126   | 189999   | 244939   | 393361   | 634978   | 758479   | 690874   | 466759   | 982033   | 722271   | 441180   | 413399   | 270268   |
| fpHILIC | Positive | 215.0695 | 3.30 | unknown | 758461   | 665809   | 351820   | 327188   | 287913  | 422112  | 217883   | 135843   | 290530   | 299320   | 343789   | 475433   | 382310   | 366971   | 511029   | 506340   | 264736   | 542889   | 430431   |
| EIC     | Negative | 317.1757 | 1.82 | unknown | 260925   | 101172   | 284850   | 0        | 20670   | 62667   | 50469    | 0        | 24968    | 0        | 44532    | 80563    | 62328    | 56076    | 72203    | 68372    | 5074     |          |          |

|         |          |          |      |         |          |          |          |          |          |          |          |          |          |          |          |          |          |          |          |          |          |          |          |
|---------|----------|----------|------|---------|----------|----------|----------|----------|----------|----------|----------|----------|----------|----------|----------|----------|----------|----------|----------|----------|----------|----------|----------|
| EIC     | Negative | 332.1952 | 2.57 | unknown | 678088   | 751925   | 713821   | 475104   | 289811   | 287810   | 411782   | 113813   | 247135   | 1009077  | 786932   | 886274   | 591511   | 576369   | 355083   | 594427   | 716346   | 511519   | 138287   |
| fpHILIC | Positive | 297.1848 | 0.50 | unknown | 692761   | 184801   | 858570   | 401424   | 51301    | 66287    | 158794   | 140996   | 156789   | 338871   | 96439    | 220531   | 230568   | 115769   | 166277   | 83176    | 186174   | 378495   | 171228   |
| EIC     | Negative | 241.0873 | 2.50 | unknown | 156770   | 111839   | 196385   | 107992   | 58247    | 141524   | 93579    | 95865    | 25098    | 143229   | 127643   | 212431   | 228464   | 136059   | 56234    | 163831   | 231756   | 441308   | 163492   |
| EIC     | Negative | 604.3629 | 4.32 | unknown | 6615367  | 8078800  | 6352122  | 6997652  | 8239092  | 1630522  | 1176116  | 7673590  | 1032689  | 765693   | 7906507  | 1004661  | 8088664  | 7022885  | 7979388  | 8206085  | 9106481  | 764615   | 7950123  |
| EIC     | Negative | 362.1979 | 2.18 | unknown | 1509307  | 2541154  | 1845119  | 1414161  | 1061035  | 370140   | 979976   | 572089   | 1036666  | 1286456  | 626902   | 1553579  | 910609   | 632450   | 1065233  | 2122905  | 1516466  | 1579292  | 637363   |
| EIC     | Negative | 506.6292 | 0.52 | unknown | 663519   | 97208    | 733765   | 410739   | 208437   | 323647   | 145494   | 0        | 356302   | 1135753  | 136457   | 34966    | 152028   | 123929   | 138404   | 292169   | 99724    | 294755   | 955753   |
| EIC     | Negative | 396.2471 | 2.52 | unknown | 617950   | 298742   | 573852   | 576935   | 127926   | 145484   | 228739   | 186262   | 175749   | 627133   | 296296   | 382913   | 355814   | 324510   | 199722   | 340846   | 282046   | 394489   | 271574   |
| EIC     | Negative | 269.1762 | 3.81 | unknown | 530097   | 262179   | 565832   | 321685   | 167861   | 163022   | 305119   | 249648   | 176876   | 314148   | 258589   | 462403   | 515286   | 329200   | 236662   | 315357   | 352690   | 592229   | 323989   |
| fpHILIC | Negative | 347.1862 | 0.61 | unknown | 2140757  | 1108121  | 1632466  | 2510625  | 707604   | 867915   | 764665   | 735105   | 909411   | 2229096  | 1261594  | 1648246  | 1258968  | 924758   | 1260584  | 1989293  | 1621760  | 1290715  | 1067879  |
| EIC     | Negative | 334.2108 | 1.80 | unknown | 432327   | 123141   | 283125   | 0        | 39171    | 29529    | 70860    | 27423    | 37598    | 438096   | 95404    | 102370   | 54545    | 94293    | 386517   | 108601   | 113737   | 0        | 92291    |
| EIC     | Negative | 440.6790 | 0.52 | unknown | 282061   | 36804    | 332575   | 242050   | 97791    | 118770   | 31983    | 0        | 174862   | 484781   | 29775    | 81738    | 62973    | 0        | 33243    | 167326   | 40056    | 142480   | 366745   |
| EIC     | Negative | 299.1653 | 2.99 | unknown | 5511847  | 2940737  | 9794825  | 6173154  | 1275353  | 1989662  | 2734594  | 1672650  | 1779063  | 3960767  | 3628947  | 4870494  | 3905599  | 3088958  | 2692748  | 4289608  | 3788619  | 3357501  | 2209133  |
| fpHILIC | Positive | 274.0890 | 3.15 | unknown | 639991   | 1579869  | 917742   | 633916   | 612691   | 886710   | 854295   | 613996   | 588857   | 1101125  | 1034786  | 1059433  | 964733   | 1197053  | 1685125  | 983886   | 1109377  | 1108206  | 1269716  |
| EIC     | Negative | 332.1952 | 3.24 | unknown | 838979   | 475465   | 1160051  | 891887   | 198201   | 190644   | 307307   | 205189   | 178292   | 636536   | 295201   | 430156   | 360531   | 232622   | 263107   | 426516   | 329971   | 536888   | 313741   |
| EIC     | Negative | 275.0601 | 2.33 | unknown | 71774    | 169797   | 262999   | 38294    | 94082    | 227254   | 108574   | 59725    | 72579    | 195865   | 455680   | 439061   | 199818   | 451061   | 342952   | 191436   | 132418   | 92968    | 214671   |
| EIC     | Negative | 258.2426 | 6.54 | unknown | 207253   | 217915   | 158474   | 329650   | 168760   | 186437   | 197599   | 158994   | 306171   | 368983   | 406519   | 285063   | 400308   | 273880   | 231594   | 410331   | 401691   | 347319   | 377112   |
| fpHILIC | Negative | 164.0433 | 0.51 | unknown | 722660   | 440872   | 539080   | 381674   | 253895   | 753430   | 326288   | 182900   | 356435   | 578965   | 507317   | 571624   | 400843   | 1248778  | 1018973  | 443520   | 496345   | 582382   | 712530   |
| fpHILIC | Positive | 344.1849 | 4.83 | unknown | 493370   | 376712   | 193827   | 140629   | 152675   | 184254   | 165087   | 159370   | 207877   | 280294   | 206777   | 165603   | 173755   | 525221   | 788868   | 362891   | 296183   | 147978   | 320512   |
| EIC     | Negative | 642.5975 | 0.52 | unknown | 275880   | 80483    | 438670   | 331676   | 165538   | 224011   | 101258   | 0        | 427383   | 100949   | 78164    | 122909   | 0        | 78166    | 172148   | 75646    | 197439   | 331580   |          |
| EIC     | Negative | 348.1904 | 2.68 | unknown | 308578   | 187260   | 375778   | 252909   | 94071    | 126930   | 168807   | 136575   | 109412   | 247416   | 158504   | 237804   | 260110   | 192481   | 287160   | 211208   | 196290   | 233846   | 179704   |
| EIC     | Negative | 336.2265 | 2.51 | unknown | 13094569 | 6216816  | 11192925 | 11155177 | 2550733  | 2848984  | 5088622  | 3703638  | 3402459  | 11667212 | 5845750  | 8071036  | 7087726  | 6723008  | 4165927  | 6819405  | 5730700  | 8423032  | 5595070  |
| EIC     | Negative | 398.2028 | 4.02 | unknown | 232181   | 107697   | 424094   | 186882   | 77740    | 150796   | 116521   | 104582   | 172109   | 145481   | 168487   | 207070   | 142161   | 85927    | 178193   | 155968   | 220276   | 292765   |          |
| EIC     | Negative | 501.3012 | 3.76 | unknown | 441575   | 42226    | 156999   | 415490   | 73810    | 188551   | 108844   | 252247   | 196426   | 449712   | 219251   | 159758   | 286173   | 31632    | 101441   | 206867   | 306974   | 817692   | 0        |
| EIC     | Negative | 632.2962 | 3.10 | unknown | 84366    | 56970    | 97538    | 65655    | 36577    | 86375    | 34852    | 86346    | 80205    | 93418    | 109212   | 78271    | 73091    | 91563    | 120551   | 112011   | 72022    | 167954   |          |
| EIC     | Negative | 392.2172 | 2.43 | unknown | 448182   | 303201   | 471920   | 407785   | 135569   | 185532   | 329352   | 182065   | 138793   | 315768   | 235428   | 435915   | 395758   | 357837   | 360976   | 281071   | 312141   | 365096   | 379499   |
| EIC     | Negative | 491.3379 | 2.90 | unknown | 2764365  | 2072413  | 2862636  | 1778917  | 2214720  | 3115955  | 1092260  | 1367018  | 939707   | 4780111  | 2896812  | 4722451  | 2908559  | 4717952  | 4184104  | 2319768  | 3420280  | 3604194  | 1741785  |
| EIC     | Negative | 275.1656 | 2.14 | unknown | 1141625  | 905261   | 2651059  | 2112626  | 350968   | 690615   | 776405   | 498624   | 759096   | 2516863  | 1098194  | 2666536  | 1037201  | 1037681  | 707269   | 1121263  | 1296847  | 1270281  | 984539   |
| EIC     | Negative | 348.1902 | 1.78 | unknown | 292501   | 96619    | 236142   | 87540    | 24540    | 40433    | 44905    | 32281    | 82541    | 382242   | 102442   | 90240    | 63204    | 78298    | 59934    | 70763    | 59653    | 0        | 116116   |
| EIC     | Negative | 492.2327 | 1.93 | unknown | 1135930  | 1674452  | 1717524  | 525694   | 1437654  | 1171804  | 2117886  | 0        | 1159425  | 1143574  | 1607359  | 2243320  | 1976256  | 2238491  | 1881711  | 2625974  | 3692941  | 0        | 2128655  |
| EIC     | Negative | 560.5912 | 0.52 | unknown | 889054   | 154682   | 1143048  | 629359   | 200582   | 390898   | 167621   | 0        | 566280   | 1490302  | 144701   | 123175   | 180501   | 0        | 181719   | 385297   | 98966    | 306428   | 1337424  |
| EIC     | Negative | 335.2232 | 2.06 | unknown | 3208558  | 940789   | 3393971  | 1882465  | 401188   | 682408   | 703919   | 826015   | 711775   | 4205317  | 1077360  | 1062370  | 1069698  | 1350686  | 756339   | 935420   | 1617103  | 1087670  | 1450685  |
| EIC     | Negative | 634.4110 | 2.91 | unknown | 842600   | 348231   | 1127691  | 669080   | 181982   | 107056   | 320774   | 142724   | 183171   | 833536   | 343932   | 473014   | 499038   | 384296   | 241918   | 449104   | 448580   | 345778   | 160395   |
| EIC     | Negative | 296.1852 | 3.28 | unknown | 172382   | 0        | 0        | 0        | 0        | 97066    | 0        | 0        | 0        | 84625    | 0        | 76965    | 0        | 0        | 83168    | 0        | 0        | 0        | 87715    |
| EIC     | Negative | 492.3420 | 2.90 | unknown | 836372   | 635020   | 828573   | 514073   | 676060   | 972516   | 303524   | 429411   | 311384   | 1448771  | 906156   | 1415998  | 889685   | 1500203  | 1338635  | 673778   | 1091950  | 1124903  | 515035   |
| fpHILIC | Negative | 172.0979 | 0.59 | unknown | 10766249 | 9983647  | 7206208  | 5281037  | 5526636  | 11126112 | 6167706  | 2938585  | 5534225  | 1790104  | 1185799  | 9052722  | 7106318  | 10388216 | 24339886 | 9942607  | 5509938  | 5345439  | 10017599 |
| EIC     | Negative | 318.2157 | 4.89 | unknown | 2326293  | 832679   | 2910198  | 1819115  | 463822   | 339379   | 727578   | 791397   | 485002   | 3268810  | 1091816  | 936752   | 650567   | 710295   | 442511   | 1087566  | 1427150  | 1035645  | 960265   |
| fpHILIC | Negative | 150.0126 | 4.37 | unknown | 717313   | 597301   | 353734   | 508917   | 167862   | 711629   | 110366   | 287699   | 119822   | 107330   | 120861   | 63890    | 1808713  | 1206309  | 148348   | 196528   | 240651   | 674248   | 1480792  |
| EIC     | Negative | 411.1853 | 4.02 | unknown | 298425   | 132979   | 591793   | 311056   | 92656    | 110035   | 200442   | 153924   | 123558   | 225154   | 178094   | 191444   | 286246   | 158412   | 76579    | 214140   | 220646   | 285186   | 406025   |
| EIC     | Negative | 448.3515 | 6.54 | unknown | 1514345  | 817049   | 1114464  | 1244553  | 1201635  | 864292   | 1324778  | 1263059  | 1241499  | 1974385  | 2038698  | 1041895  | 1648961  | 1867098  | 3032683  | 2526601  | 1331350  | 1474620  | 2057576  |
| EIC     | Negative | 335.2232 | 2.51 | unknown | 59014202 | 27961316 | 50851402 | 50501125 | 11570085 | 12789344 | 22887651 | 16927765 | 15279563 | 52392291 | 26573302 | 36664648 | 32298966 | 30226777 | 18823069 | 31027752 | 25914558 | 39093680 | 25666981 |
| EIC     | Negative | 345.1711 | 2.46 | unknown | 2235302  | 2122511  | 1963752  | 2026742  | 1021542  | 1790684  | 1662403  | 1141449  | 2161355  | 2086468  | 2669193  | 3330146  | 2333259  | 2928090  | 2077097  | 2164089  | 2625343  | 2920254  |          |
| EIC     | Negative | 367.1687 | 2.43 | unknown | 278237   | 150594   | 276808   | 210145   | 92422    | 82647    | 119951   | 86560    | 63987    | 178894   | 127899   | 190601   | 165215   | 155618   | 172004   | 166638   | 138735   | 137724   | 175213   |
| EIC     | Negative | 315.1602 | 3.49 | unknown | 230034   | 233869   | 325524   | 270922   | 91373    | 86462    | 114050   | 68367    | 83921    | 163404   | 126691   | 204601   | 152778   | 116673   | 155682   | 240050   | 151519   | 119660   | 120823   |
| EIC     | Negative | 427.1739 | 2.31 | unknown | 490797   | 1205394  | 330747   | 1152354  | 461104   | 587072   | 887994   | 753664   | 853489   | 1810536  | 804279   | 1424784  | 1364123  | 983528   | 1221465  | 974404   | 948940   | 2037923  | 1103884  |
| EIC     | Negative | 395.2441 | 2.52 | unknown | 2659770  | 1210226  | 2223060  | 2231245  | 532343   | 609718   | 923506   | 695299   | 2549396  | 1165092  | 1575968  | 1360929  | 1359201  | 1359201  | 823550   | 1427710  | 1169437  | 1645776  | 1140871  |
| EIC     | Negative | 273.1495 | 2.64 | unknown | 168817   | 88359    | 185668   | 87352    | 44664    | 64283    | 99767    | 0        | 65938    | 103643   | 92772    | 137879   | 169365   | 114096   | 59272    | 69695    | 115180   | 143831   | 72928    |
| fpHILIC | Positive | 334.0916 | 2.49 | unknown | 280837   | 386853   | 189451   | 109867   | 131578   | 301549   | 199950   | 112685   | 157215   | 237463   | 306432   | 247243   | 218761   | 554968   | 414598   | 199290   | 234988   | 308455   | 447743   |
| EIC     | Negative | 325.1619 | 0.50 | unknown | 288737   | 333447   | 142143   | 107840   | 155387   | 218304   | 95506    | 66237    | 156024   | 156221   | 283316   | 307606   | 254709   | 79514    | 388541   | 358035   | 152511   | 131892   | 199801   |
| EIC     | Negative | 400.2190 | 4.14 | unknown | 434229   | 361446   | 385658   | 358456   | 139352   | 12       |          |          |          |          |          |          |          |          |          |          |          |          |          |

|         |          |          |      |         |          |          |          |          |         |         |          |         |         |          |         |          |         |         |          |           |          |          |         |
|---------|----------|----------|------|---------|----------|----------|----------|----------|---------|---------|----------|---------|---------|----------|---------|----------|---------|---------|----------|-----------|----------|----------|---------|
| fpHILIC | Negative | 383.1218 | 2.95 | unknown | 648705   | 394655   | 500009   | 270954   | 236832  | 197734  | 214952   | 295515  | 254374  | 438305   | 196989  | 279845   | 245771  | 623637  | 658498   | 215333    | 314613   | 606044   | 413192  |
| fpHILIC | Negative | 316.1998 | 0.44 | unknown | 2556892  | 1272537  | 4117182  | 2881375  | 520963  | 689405  | 1065322  | 687881  | 845880  | 2162383  | 1370154 | 1822527  | 1678748 | 1248702 | 967679   | 1528549   | 1645298  | 1567938  | 1303208 |
| EIC     | Negative | 407.2439 | 2.20 | unknown | 0        | 2121517  | 0        | 4049376  | 1393998 | 922606  | 2366843  | 0       | 2414100 | 3508462  | 2958079 | 1213691  | 2554852 | 2218908 | 1668811  | 3046200   | 1496269  | 1498817  | 2393224 |
| EIC     | Negative | 336.2265 | 3.32 | unknown | 586711   | 250621   | 693174   | 569095   | 119432  | 133162  | 216937   | 224069  | 103939  | 400275   | 217597  | 281275   | 281534  | 257120  | 235738   | 288485    | 355617   | 331462   | 262116  |
| EIC     | Negative | 628.5039 | 6.76 | unknown | 154720   | 133714   | 120677   | 167767   | 149672  | 121126  | 155581   | 131895  | 161622  | 254336   | 374310  | 216275   | 282909  | 342840  | 291445   | 261887    | 319731   | 149797   | 382116  |
| EIC     | Negative | 395.1842 | 2.88 | unknown | 647453   | 701803   | 490755   | 562735   | 377386  | 256385  | 368540   | 318908  | 248051  | 480911   | 392347  | 497935   | 499432  | 546329  | 705022   | 674103    | 675614   | 453622   | 395156  |
| EIC     | Negative | 335.2153 | 2.90 | unknown | 653884   | 299110   | 571626   | 404574   | 174381  | 0       | 394776   | 294335  | 305743  | 0        | 411797  | 503719   | 600354  | 372959  | 283519   | 454182    | 398008   | 582217   | 445708  |
| EIC     | Negative | 507.2244 | 2.08 | unknown | 241339   | 145474   | 333067   | 112508   | 94555   | 149657  | 216458   | 0       | 126354  | 171408   | 196150  | 417277   | 398260  | 192980  | 243202   | 323614    | 266069   | 110356   | 234153  |
| fpHILIC | Negative | 305.1428 | 0.60 | unknown | 4566534  | 2405595  | 3827408  | 4035873  | 2909376 | 2931965 | 3407495  | 4326452 | 2852460 | 6336068  | 5124681 | 6176995  | 5046346 | 5555996 | 4259402  | 4664017   | 6222604  | 11538601 | 3747571 |
| EIC     | Negative | 451.1516 | 2.24 | unknown | 43476    | 14134    | 182527   | 166097   | 15133   | 9990    | 40100    | 94512   | 30370   | 203156   | 31563   | 49209    | 39130   | 43265   | 35723    | 46447     | 33533    | 206229   | 30301   |
| EIC     | Negative | 411.1805 | 3.12 | unknown | 402264   | 476210   | 341684   | 407448   | 138666  | 372899  | 221904   | 99704   | 150007  | 364312   | 433712  | 606382   | 563640  | 469988  | 477015   | 375690    | 425404   | 253204   | 291200  |
| EIC     | Negative | 546.2809 | 2.55 | unknown | 609738   | 0        | 1022007  | 491032   | 0       | 0       | 382536   | 22219   | 253086  | 0        | 0       | 9685     | 0       | 0       | 0        | 0         | 10157    | 740196   | 0       |
| EIC     | Negative | 399.2156 | 4.88 | unknown | 881828   | 333996   | 1100042  | 628107   | 168731  | 108922  | 299547   | 282779  | 190670  | 1227605  | 432012  | 371825   | 272957  | 282591  | 160126   | 461727    | 528644   | 386813   | 410771  |
| EIC     | Negative | 481.2183 | 4.14 | unknown | 344207   | 289298   | 276653   | 246739   | 102187  | 114169  | 179561   | 108389  | 152882  | 190470   | 199936  | 298991   | 280787  | 209118  | 317032   | 275828    | 259849   | 178607   | 190773  |
| EIC     | Negative | 442.6767 | 0.52 | unknown | 697418   | 159821   | 1009455  | 519466   | 31247   | 345263  | 235214   | 38999   | 462861  | 1216843  | 163302  | 146691   | 269012  | 0       | 163876   | 412367    | 126362   | 340174   | 1031498 |
| EIC     | Negative | 313.1814 | 2.89 | unknown | 17723829 | 13500599 | 19370701 | 16257297 | 6365153 | 4070485 | 7633011  | 6518614 | 4599663 | 11922725 | 7224893 | 10587671 | 9680088 | 8799320 | 10319117 | 136660542 | 13305171 | 10288593 | 6818254 |
| EIC     | Negative | 332.1952 | 2.41 | unknown | 1581371  | 1169700  | 2176411  | 1405518  | 462710  | 531920  | 918119   | 497802  | 506780  | 1220875  | 1564920 | 922728   | 1113937 | 1310161 | 1011033  | 1065171   | 984316   | 1075637  | 0       |
| EIC     | Negative | 400.2189 | 4.28 | unknown | 398569   | 169134   | 409419   | 303500   | 68322   | 47342   | 117481   | 450569  | 137471  | 450569   | 213794  | 1936182  | 232316  | 131627  | 111274   | 165653    | 208502   | 206507   | 189988  |
| EIC     | Negative | 314.1846 | 2.89 | unknown | 3933189  | 3012204  | 4187821  | 3563445  | 1388392 | 885617  | 1675583  | 1932801 | 1008888 | 2619928  | 1611899 | 2286720  | 2091220 | 1962098 | 2283225  | 2973308   | 2882403  | 2243855  | 1480080 |
| EIC     | Negative | 347.1869 | 1.59 | unknown | 928835   | 428851   | 918421   | 694990   | 163136  | 208714  | 311326   | 195319  | 185696  | 532949   | 433346  | 396445   | 332111  | 352940  | 490251   | 340352    | 212485   | 366660   | 0       |
| EIC     | Negative | 415.1206 | 2.91 | unknown | 139386   | 97585    | 196564   | 195753   | 47072   | 49458   | 79859    | 49460   | 63106   | 92286    | 189431  | 236177   | 143844  | 119296  | 110327   | 166667    | 96148    | 101575   | 66644   |
| EIC     | Negative | 493.3468 | 2.90 | unknown | 134390   | 176788   | 226775   | 48148    | 137806  | 220708  | 63905    | 123776  | 85807   | 308988   | 187728  | 153457   | 291640  | 357724  | 180465   | 264330    | 252428   | 129436   | 0       |
| fpHILIC | Negative | 256.0806 | 3.00 | unknown | 362114   | 239552   | 224482   | 159338   | 279653  | 289775  | 257938   | 217772  | 56174   | 274660   | 283072  | 219133   | 175838  | 342885  | 550285   | 296485    | 361894   | 291630   | 565549  |
| EIC     | Positive | 329.1761 | 4.71 | unknown | 8250871  | 6335363  | 9281332  | 7361538  | 3079908 | 2864187 | 4679138  | 3481954 | 4008401 | 5001494  | 5121459 | 8905134  | 8097420 | 6029255 | 8395595  | 8516619   | 5978987  | 5316056  | 5773969 |
| EIC     | Negative | 431.2100 | 2.52 | unknown | 2188498  | 879841   | 1594725  | 1534141  | 362919  | 398254  | 694579   | 528463  | 466451  | 1812850  | 806420  | 1096071  | 987371  | 938488  | 601280   | 954062    | 776240   | 1478321  | 792603  |
| EIC     | Negative | 315.1967 | 3.31 | unknown | 4734872  | 3994118  | 12148226 | 9287713  | 3101155 | 1603888 | 14204386 | 1437630 | 2116127 | 6026021  | 5753933 | 5892898  | 2390419 | 3538217 | 2623351  | 4284150   | 5724928  | 2638325  | 2913287 |
| EIC     | Negative | 241.0558 | 0.68 | unknown | 73092    | 62359    | 68545    | 35059    | 40997   | 44023   | 33999    | 19561   | 44167   | 73510    | 47644   | 57798    | 63731   | 113483  | 65732    | 90291     | 52423    | 53562    | 81963   |
| EIC     | Negative | 387.1805 | 2.10 | unknown | 121224   | 104841   | 40931    | 43041    | 34428   | 66051   | 100119   | 0       | 50082   | 47076    | 76515   | 150954   | 141054  | 78229   | 101837   | 133390    | 97729    | 55357    | 83857   |
| EIC     | Negative | 633.4074 | 2.91 | unknown | 3904710  | 1824757  | 6026683  | 3620201  | 920682  | 780893  | 1607178  | 945807  | 719989  | 3825605  | 2011542 | 2828035  | 2231026 | 2130565 | 1409823  | 2616423   | 2324059  | 1969218  | 1050919 |
| fpHILIC | Negative | 627.4995 | 0.36 | unknown | 952949   | 1929736  | 1469361  | 2062511  | 789196  | 799022  | 964389   | 828775  | 825232  | 1632923  | 2804694 | 1271306  | 1751303 | 3693857 | 1261168  | 1256415   | 2371840  | 864963   | 2176933 |
| EIC     | Negative | 249.1498 | 2.53 | unknown | 753315   | 43141    | 307241   | 56404    | 35899   | 41275   | 44968    | 45489   | 33624   | 79616    | 49362   | 46818    | 59030   | 59935   | 43706    | 43393     | 153715   | 72144    | 66777   |
| EIC     | Negative | 267.1614 | 4.37 | unknown | 665420   | 516503   | 790747   | 294223   | 121005  | 263601  | 396861   | 341401  | 167196  | 342306   | 497933  | 655327   | 757502  | 462394  | 722044   | 543187    | 413288   | 349237   | 414605  |
| EIC     | Negative | 361.1442 | 3.98 | unknown | 74442    | 217286   | 104126   | 269903   | 84271   | 18802   | 69133    | 111228  | 78584   | 76282    | 89447   | 105342   | 85477   | 101981  | 180703   | 203088    | 121731   | 106675   | 74143   |
| EIC     | Negative | 459.1865 | 3.92 | unknown | 638768   | 176534   | 501929   | 1429399  | 45843   | 63530   | 64622    | 63297   | 63236   | 1196855  | 270587  | 53933    | 0       | 123762  | 238607   | 0         | 185017   | 22484    | 0       |
| EIC     | Negative | 309.1036 | 0.47 | unknown | 422838   | 638308   | 343324   | 266949   | 45843   | 254727  | 412002   | 331239  | 312972  | 138616   | 483161  | 583364   | 562312  | 408288  | 841049   | 633222    | 370048   | 359166   | 426860  |
| fpHILIC | Positive | 363.1534 | 2.94 | unknown | 1213443  | 734983   | 1262637  | 515520   | 386331  | 499347  | 327455   | 408691  | 357968  | 804133   | 381973  | 373720   | 417536  | 844084  | 962106   | 434716    | 625471   | 1041286  | 692944  |
| EIC     | Negative | 557.2967 | 0.95 | unknown | 244249   | 71946    | 260045   | 227511   | 60407   | 62807   | 55043    | 62807   | 55043   | 80143    | 87525   | 41714    | 56835   | 68093   | 45779    | 83660     | 143861   | 92105    | 111917  |
| fpHILIC | Negative | 187.0723 | 2.48 | unknown | 2590279  | 2603202  | 1720143  | 2002145  | 1209446 | 2147625 | 974350   | 1744907 | 1518503 | 2116532  | 2449133 | 2295106  | 1340031 | 3463562 | 4907559  | 1605101   | 1584373  | 2298443  | 4029348 |
| EIC     | Negative | 499.2283 | 2.52 | unknown | 305126   | 174937   | 0        | 151054   | 92527   | 148940  | 0        | 109106  | 329929  | 169663   | 202404  | 200475   | 194577  | 128204  | 109106   | 166213    | 200854   | 159418   | 0       |
| fpHILIC | Negative | 351.2181 | 0.97 | unknown | 1495092  | 858499   | 1613503  | 1403264  | 311709  | 431756  | 693063   | 596668  | 536620  | 1301975  | 789318  | 794263   | 943581  | 691788  | 736734   | 1117120   | 985315   | 1107325  | 882283  |
| EIC     | Negative | 524.2944 | 4.21 | unknown | 880317   | 703177   | 1342470  | 635614   | 321444  | 215487  | 639813   | 360125  | 1370886 | 639067   | 685204  | 900038   | 734655  | 412384  | 423867   | 988407    | 359762   | 1124636  | 0       |
| EIC     | Negative | 417.2263 | 2.52 | unknown | 3295371  | 1403006  | 2191128  | 2283717  | 609869  | 659754  | 1165867  | 889023  | 806230  | 3165764  | 1325364 | 1758512  | 1570977 | 1485653 | 1002030  | 1482974   | 1295492  | 2706547  | 1375172 |
| fpHILIC | Negative | 73.0296  | 1.68 | unknown | 0        | 2908138  | 1998916  | 2695115  | 1708235 | 0       | 1940689  | 1552307 | 2435162 | 2456248  | 2992725 | 2478775  | 2404442 | 2907341 | 4667172  | 3200344   | 1819352  | 2644663  | 2266548 |
| EIC     | Negative | 500.2049 | 3.21 | unknown | 124987   | 63950    | 108135   | 51165    | 60449   | 47131   | 50609    | 60877   | 31501   | 116280   | 67898   | 120498   | 66231   | 76714   | 53173    | 77406     | 67117    | 209533   | 72035   |
| EIC     | Negative | 303.1603 | 2.48 | unknown | 214624   | 256982   | 218047   | 158661   | 95180   | 197576  | 152199   | 145435  | 110146  | 263250   | 282353  | 437883   | 441805  | 218706  | 350956   | 287046    | 239156   | 253330   | 210307  |
| fpHILIC | Positive | 191.0818 | 1.85 | unknown | 886105   | 0        | 0        | 285529   | 46587   | 78925   | 0        | 273101  | 743363  | 37708    | 35031   | 329403   | 382485  | 832626  | 127762   | 98008     | 1234628  | 443825   | 286169  |
| EIC     | Negative | 545.2726 | 2.57 | unknown | 2101130  | 27810    | 3322688  | 1514155  | 24359   | 28577   | 31367    | 1216746 | 63240   | 824666   | 12204   | 28719    | 46135   | 44534   | 49007    | 52879     | 32494    | 2452593  | 31814   |
| EIC     | Negative | 595.2744 | 2.48 | unknown | 179988   | 41834    | 330929   | 197512   | 36309   | 37549   | 20560    | 123576  | 59161   | 289406   | 39101   | 26056    | 50887   | 57489   | 33860    | 86966     | 57617    | 302339   | 52408   |
| EIC     | Negative | 362.1975 | 3.63 | unknown | 148599   | 87942    | 503089   | 199227   | 48931   | 65072   | 81972    | 67214   | 72138   | 72484    | 52173   | 89672    | 93141   | 88745   | 33212    |           |          |          |         |



|         |          |          |      |         |          |          |          |          |          |          |          |          |          |          |          |          |          |          |          |          |          |          |          |
|---------|----------|----------|------|---------|----------|----------|----------|----------|----------|----------|----------|----------|----------|----------|----------|----------|----------|----------|----------|----------|----------|----------|----------|
| EIC     | Negative | 266.1482 | 1.73 | unknown | 225792   | 211906   | 338964   | 32039    | 79104    | 152511   | 50656    | 141479   | 73361    | 218172   | 138473   | 165145   | 78394    | 540061   | 266034   | 63912    | 187361   | 122972   | 345127   |
| fpHILIC | Positive | 188.1390 | 4.89 | unknown | 608610   | 1681511  | 844982   | 750557   | 582034   | 746097   | 983606   | 646096   | 857372   | 1466991  | 1297926  | 1156658  | 1029522  | 2420338  | 2369755  | 1267222  | 1540805  | 792188   | 1604855  |
| EIC     | Negative | 414.1986 | 2.24 | unknown | 930836   | 216354   | 807440   | 642038   | 352792   | 75040    | 243512   | 0        | 234962   | 686191   | 137584   | 245130   | 139958   | 171635   | 221878   | 217354   | 195576   | 875903   | 3040954  |
| EIC     | Negative | 493.2444 | 3.08 | unknown | 665996   | 219692   | 745286   | 343559   | 103007   | 121698   | 190946   | 180299   | 80214    | 294179   | 123814   | 94290    | 336090   | 115128   | 304454   | 189351   | 154620   | 328326   | 379393   |
| EIC     | Negative | 339.1361 | 1.32 | unknown | 55862    | 0        | 0        | 0        | 0        | 0        | 0        | 0        | 69371    | 0        | 0        | 43665    | 93964    | 102598   | 0        | 0        | 139142   | 0        | 0        |
| EIC     | Negative | 316.2572 | 3.81 | unknown | 785681   | 434829   | 850208   | 455522   | 379525   | 730433   | 373047   | 290186   | 679871   | 440099   | 364589   | 626239   | 690636   | 523858   | 265165   | 1581879  | 1167971  | 1294727  | 613097   |
| fpHILIC | Negative | 115.0594 | 2.78 | unknown | 967624   | 884766   | 698569   | 334744   | 449243   | 196162   | 313836   | 396761   | 314815   | 581755   | 550222   | 610245   | 378005   | 907270   | 1673636  | 503828   | 513470   | 681914   | 830671   |
| EIC     | Negative | 334.2109 | 3.04 | unknown | 1044303  | 527734   | 1258995  | 868421   | 196531   | 229557   | 282872   | 326171   | 163710   | 775671   | 409851   | 618982   | 434986   | 517890   | 357946   | 554279   | 507653   | 480706   | 505979   |
| EIC     | Negative | 627.5000 | 6.76 | unknown | 245005   | 311420   | 261665   | 368251   | 257070   | 258779   | 292514   | 300253   | 386361   | 560470   | 683608   | 511737   | 633328   | 801288   | 628375   | 581907   | 710522   | 364555   | 711712   |
| fpHILIC | Positive | 191.0836 | 2.23 | unknown | 266816   | 524906   | 385380   | 211417   | 268055   | 422842   | 312731   | 272734   | 346755   | 382475   | 354792   | 493235   | 379928   | 1406658  | 700437   | 402888   | 471524   | 482292   | 1204279  |
| EIC     | Negative | 481.3126 | 5.55 | unknown | 294438   | 209631   | 616169   | 122436   | 544116   | 0        | 176550   | 0        | 55499    | 0        | 90778    | 0        | 121589   | 644605   | 485261   | 0        | 479071   | 0        | 595894   |
| EIC     | Negative | 227.1007 | 0.47 | unknown | 364991   | 522278   | 283656   | 210738   | 196198   | 373493   | 239364   | 132616   | 174807   | 280860   | 421666   | 535374   | 509565   | 425180   | 706659   | 533797   | 319701   | 313922   | 371858   |
| EIC     | Negative | 376.1779 | 2.24 | unknown | 119623   | 144677   | 109623   | 89496    | 66152    | 21244    | 43263    | 0        | 61806    | 81228    | 52972    | 92543    | 84579    | 50359    | 72961    | 123359   | 108528   | 34748    | 48771    |
| EIC     | Negative | 241.1556 | 1.52 | unknown | 7457609  | 6164595  | 34809275 | 15670420 | 11280370 | 7844997  | 10338987 | 23256634 | 5893934  | 25849287 | 9302933  | 7555219  | 35893832 | 12486696 | 19370552 | 7038325  | 26004970 | 50508467 | 15374320 |
| EIC     | Negative | 242.1590 | 1.52 | unknown | 1073447  | 845962   | 4688577  | 2225857  | 1545501  | 1103100  | 1413113  | 3296123  | 813330   | 3581751  | 1331828  | 1042265  | 5004859  | 1748057  | 2781458  | 969795   | 3674934  | 6950018  | 2131340  |
| EIC     | Negative | 314.1845 | 3.68 | unknown | 563567   | 399285   | 992076   | 1168161  | 228656   | 213148   | 447027   | 432004   | 223442   | 723601   | 559935   | 647193   | 915759   | 433939   | 244398   | 525263   | 546954   | 601357   | 1202850  |
| EIC     | Negative | 533.3860 | 3.37 | unknown | 162722   | 99966    | 612532   | 2268621  | 69439    | 50928    | 115878   | 59837    | 72507    | 910744   | 126355   | 220799   | 112430   | 77220    | 0        | 135850   | 204835   | 230654   | 176623   |
| EIC     | Negative | 393.2287 | 2.55 | unknown | 1120254  | 577781   | 733420   | 917198   | 195636   | 253645   | 351715   | 218434   | 703250   | 800997   | 1417711  | 648096   | 463706   | 557768   | 421926   | 623132   | 589335   | 455792   | 526511   |
| EIC     | Negative | 280.1178 | 1.32 | unknown | 55127    | 6099     | 0        | 0        | 13824    | 0        | 0        | 74032    | 0        | 17003    | 45313    | 104855   | 106141   | 0        | 7701     | 152311   | 0        | 17958    |          |
| EIC     | Negative | 374.2996 | 4.92 | unknown | 0        | 68222    | 139252   | 79995    | 15957    | 0        | 22481    | 16612    | 10204    | 18561    | 19718    | 53251    | 24044    | 22927    | 0        | 18199    | 70563    | 0        | 0        |
| EIC     | Negative | 401.1247 | 1.87 | unknown | 4520722  | 2638102  | 5615559  | 0        | 1393919  | 1797855  | 3030148  | 0        | 1861051  | 550751   | 1968139  | 3593408  | 3836243  | 2788794  | 1573694  | 4668723  | 4331126  | 0        | 5862322  |
| EIC     | Negative | 554.3160 | 2.97 | unknown | 641979   | 0        | 3163203  | 3161247  | 0        | 0        | 0        | 2335101  | 0        | 2599154  | 120834   | 0        | 137644   | 180506   | 168358   | 0        | 0        | 4522838  | 79470    |
| EIC     | Negative | 440.1471 | 1.63 | unknown | 211523   | 76656    | 0        | 0        | 92561    | 38790    | 101640   | 0        | 77033    | 64411    | 124116   | 126348   | 139626   | 54278    | 68085    | 198628   | 117545   | 160302   | 88884    |
| EIC     | Negative | 499.2017 | 3.21 | unknown | 445319   | 256834   | 374253   | 169334   | 233558   | 157094   | 167224   | 230571   | 126318   | 449305   | 266650   | 445250   | 230160   | 295612   | 178669   | 304484   | 268147   | 832623   | 287240   |
| EIC     | Negative | 291.1966 | 3.68 | unknown | 277555   | 174644   | 211274   | 427852   | 81834    | 100335   | 117060   | 95145    | 77689    | 344738   | 241467   | 227507   | 184579   | 160140   | 141842   | 196467   | 176756   | 248713   | 202387   |
| EIC     | Negative | 402.1282 | 1.87 | unknown | 1045855  | 660723   | 1297474  | 0        | 327306   | 446318   | 694088   | 0        | 428944   | 0        | 435572   | 874320   | 879292   | 632027   | 377189   | 1117541  | 1009500  | 0        | 1383917  |
| EIC     | Negative | 445.3239 | 5.52 | unknown | 223941   | 72850    | 549864   | 113667   | 38854    | 48027    | 40040    | 168647   | 34342    | 251754   | 96392    | 85501    | 73718    | 121515   | 30916    | 92871    | 74308    | 442435   | 36855    |
| EIC     | Negative | 413.1948 | 2.24 | unknown | 3221345  | 850324   | 3114585  | 2579121  | 1427426  | 267871   | 1007690  | 0        | 996121   | 2818424  | 556733   | 939211   | 665875   | 737369   | 905541   | 860824   | 832605   | 3633518  | 1357826  |
| fpHILIC | Negative | 355.1402 | 1.38 | unknown | 342352   | 192597   | 0        | 0        | 85209    | 301340   | 39561    | 0        | 71673    | 0        | 138713   | 147546   | 79653    | 782468   | 481659   | 88108    | 140889   | 0        | 310878   |
| EIC     | Negative | 252.0875 | 1.74 | unknown | 421217   | 237934   | 141394   | 0        | 145925   | 1229402  | 74625    | 83219    | 87091    | 195489   | 180599   | 119901   | 87688    | 406404   | 550498   | 112648   | 170414   | 191381   | 185261   |
| EIC     | Negative | 314.1845 | 3.16 | unknown | 0        | 204541   | 291205   | 318262   | 123051   | 56534    | 0        | 78109    | 174291   | 257773   | 246141   | 0        | 103988   | 154581   | 205432   | 178529   | 0        | 0        | 0        |
| EIC     | Negative | 301.1802 | 3.15 | unknown | 613935   | 259813   | 926449   | 707639   | 78606    | 122598   | 172496   | 101574   | 884365   | 332770   | 276775   | 336337   | 266445   | 123174   | 325964   | 443251   | 226737   | 273216   | 0        |
| EIC     | Negative | 306.0526 | 2.47 | unknown | 636057   | 330407   | 1802316  | 329783   | 102700   | 130936   | 198953   | 292967   | 804847   | 3097618  | 308958   | 381932   | 404276   | 426438   | 397618   | 469691   | 513778   | 469629   | 304562   |
| EIC     | Negative | 494.2489 | 3.08 | unknown | 180848   | 59993    | 196647   | 127403   | 28798    | 12674    | 60111    | 61019    | 10007    | 99220    | 28109    | 11890    | 90069    | 28183    | 81504    | 38582    | 31604    | 101471   | 103186   |
| EIC     | Negative | 339.2654 | 6.07 | unknown | 0        | 96851    | 0        | 0        | 115040   | 0        | 0        | 0        | 0        | 0        | 0        | 129907   | 0        | 0        | 0        | 0        | 0        | 237583   | 0        |
| EIC     | Negative | 309.1744 | 3.48 | unknown | 0        | 0        | 0        | 224376   | 0        | 0        | 0        | 142048   | 0        | 112859   | 0        | 0        | 0        | 136936   | 156570   | 0        | 0        | 0        | 0        |
| EIC     | Negative | 332.1952 | 2.75 | unknown | 1484796  | 3404662  | 1001128  | 2518412  | 1716179  | 2490304  | 3810791  | 692592   | 1706209  | 4551371  | 3765791  | 4986059  | 5593116  | 4034315  | 3805278  | 37520856 | 3164430  | 6639558  | 4429053  |
| EIC     | Negative | 313.1815 | 3.68 | unknown | 2655918  | 1854396  | 4741684  | 5381589  | 1112702  | 957514   | 2070199  | 1542200  | 1058717  | 3417125  | 2441790  | 2982481  | 3871008  | 1819372  | 933992   | 2393952  | 2611934  | 2681392  | 5333793  |
| EIC     | Negative | 265.1449 | 1.73 | unknown | 1290256  | 1423355  | 2083526  | 365874   | 455513   | 940935   | 324962   | 756728   | 447501   | 1296751  | 1166707  | 9409334  | 3180043  | 1642763  | 431607   | 1108210  | 482945   | 204899   | 204899   |
| EIC     | Negative | 364.2135 | 3.05 | unknown | 856451   | 390082   | 2015773  | 664947   | 241297   | 281014   | 352735   | 388567   | 342267   | 710287   | 4479515  | 630245   | 519779   | 418560   | 219944   | 502101   | 1337286  | 801087   | 481385   |
| EIC     | Negative | 363.2004 | 3.92 | unknown | 15119669 | 4405569  | 11886795 | 34504401 | 1075702  | 1978481  | 1869547  | 1152444  | 26080128 | 6135584  | 1096760  | 654351   | 141966   | 2222556  | 6931487  | 673799   | 5078543  | 851340   | 851340   |
| EIC     | Negative | 390.2400 | 3.40 | unknown | 343517   | 1716191  | 2703354  | 2783240  | 972213   | 1449354  | 1147458  | 1282658  | 565753   | 1946554  | 2070434  | 1166339  | 1343225  | 677455   | 1218156  | 3150383  | 1576249  | 3930289  | 1402771  |
| EIC     | Negative | 394.2319 | 2.55 | unknown | 291567   | 137711   | 194504   | 289452   | 64224    | 64222    | 55826    | 52874    | 201739   | 108094   | 156995   | 109583   | 150098   | 119690   | 73291    | 151115   | 146236   | 133554   | 137122   |
| EIC     | Negative | 403.1322 | 1.86 | unknown | 120151   | 112346   | 294414   | 0        | 63971    | 77740    | 119652   | 0        | 82180    | 0        | 102743   | 156812   | 151156   | 118034   | 73399    | 195026   | 186993   | 0        | 263063   |
| EIC     | Negative | 331.1918 | 2.75 | unknown | 6282374  | 15350519 | 4965971  | 11012341 | 3590009  | 10946140 | 16917638 | 3234694  | 7513409  | 20567497 | 16787887 | 22404854 | 24627294 | 17657829 | 17094842 | 15704414 | 14045718 | 30209789 | 19461128 |
| EIC     | Negative | 323.2502 | 4.92 | unknown | 0        | 0        | 188648   | 0        | 0        | 83216    | 153197   | 0        | 0        | 0        | 0        | 0        | 0        | 0        | 0        | 0        | 122558   | 0        | 167421   |
| fpHILIC | Negative | 351.2179 | 0.61 | unknown | 6088249  | 3042124  | 4992715  | 6570985  | 1071411  | 1737145  | 1842690  | 2118660  | 1790046  | 6948437  | 3265446  | 3231605  | 3306362  | 2656928  | 2778732  | 3927876  | 4059087  | 4049601  | 3127161  |
| EIC     | Negative | 449.2568 | 2.48 | unknown | 0        | 15489    | 63326    | 248919   | 0        | 58130    | 61142    | 92028    | 42601    | 228441   | 64764    | 104387   | 136505   | 17798    | 52635    | 9059     | 127256   | 305848   | 37909    |
| EIC     | Negative | 365.1989 | 3.92 | unknown | 994719   | 288615   | 796322   | 2341097  | 67046    | 124789   | 92065    | 136404   | 72738    | 1755329  | 443920   | 80860    | 70501    | 0        | 167698   | 466222   | 16270    | 327054   | 58753    |
| EIC     | Negative | 461.3280 | 3.41 | unknown | 132151   | 36114    | 327626   | 27552    | 23767    | 0        | 151974   | 9708     | 164348   | 59131    | 23199    | 9422     | 25745    | 38667    | 83999    | 35024    | 219244   | 13301    | 0        |
| EIC     | Negative | 315.1967 | 4.30 | unknown | 1066732  | 700762   | 1741897  | 1699262  | 242367   | 185496   | 317589   | 319447   | 225673   |          |          |          |          |          |          |          |          |          |          |

|         |          |          |      |         |          |          |          |          |          |         |          |          |         |         |          |          |          |          |          |          |          |          |          |   |
|---------|----------|----------|------|---------|----------|----------|----------|----------|----------|---------|----------|----------|---------|---------|----------|----------|----------|----------|----------|----------|----------|----------|----------|---|
| EIC     | Negative | 521.2758 | 3.58 | unknown | 101485   | 85936    | 229525   | 146837   | 47641    | 30215   | 79816    | 63735    | 53111   | 143884  | 128411   | 115092   | 155718   | 98614    | 54777    | 83200    | 133331   | 113008   | 221319   |   |
| EIC     | Negative | 533.3024 | 2.79 | unknown | 2158825  | 39480    | 2983523  | 2259615  | 0        | 0       | 33980    | 1169330  | 79183   | 956805  | 0        | 0        | 51841    | 73019    | 0        | 0        | 0        | 2830604  | 0        |   |
| EIC     | Negative | 382.7211 | 0.52 | unknown | 400148   | 104330   | 458774   | 2296920  | 0        | 155312  | 1104336  | 34891    | 243924  | 656561  | 101195   | 97489    | 109894   | 0        | 115368   | 241508   | 76917    | 202592   | 566374   |   |
| EIC     | Negative | 350.2055 | 1.73 | unknown | 1062123  | 244300   | 590215   | 646501   | 50204    | 86051   | 90113    | 74271    | 90862   | 1223309 | 264397   | 197211   | 140488   | 234020   | 132568   | 211712   | 200111   | 129030   | 187469   |   |
| fpHILIC | Positive | 163.0597 | 2.91 | unknown | 474941   | 184246   | 277951   | 63148    | 85399    | 114431  | 225874   | 67474    | 0       | 106564  | 68748    | 116205   | 0        | 703638   | 439681   | 69763    | 76522    | 208260   | 297399   |   |
| EIC     | Negative | 399.2155 | 3.35 | unknown | 6030361  | 4007671  | 6551669  | 5147542  | 1373251  | 1487227 | 2631123  | 1477910  | 1670335 | 7965181 | 4873822  | 3864261  | 3545139  | 4400441  | 2115893  | 4284282  | 4341917  | 3360092  | 5066198  |   |
| EIC     | Negative | 459.1873 | 3.71 | unknown | 110419   | 26012    | 62687    | 284728   | 0        | 25407   | 0        | 15097    | 0       | 289190  | 56684    | 11439    | 0        | 0        | 21026    | 42160    | 11958    | 15390    | 0        |   |
| EIC     | Negative | 632.2974 | 3.00 | unknown | 72455    | 41015    | 0        | 62763    | 22399    | 71078   | 13440    | 25094    | 68510   | 94245   | 71566    | 112917   | 73870    | 70078    | 75352    | 91037    | 94969    | 66567    | 120767   |   |
| EIC     | Negative | 493.2794 | 3.03 | unknown | 163033   | 32758    | 70084    | 48486    | 0        | 86511   | 0        | 20414    | 0       | 52255   | 25757    | 78184    | 23572    | 20091    | 68208    | 21504    | 0        | 29233    | 120477   |   |
| EIC     | Negative | 389.2911 | 6.44 | unknown | 36037224 | 34703508 | 31677198 | 45834044 | 43112692 | 1716724 | 36073268 | 2006466  | 2030173 | 1659776 | 29528754 | 34153096 | 33038382 | 1988467  | 38333440 | 36841880 | 33061908 | 28463296 | 53675936 |   |
| EIC     | Negative | 273.1493 | 2.16 | unknown | 2159297  | 1225343  | 4117040  | 2997803  | 125312   | 673679  | 531134   | 462452   | 290644  | 2100717 | 1174666  | 2739157  | 1114061  | 896364   | 776650   | 877767   | 1511481  | 436964   | 1072958  |   |
| EIC     | Negative | 418.2307 | 2.52 | unknown | 823180   | 342427   | 561189   | 534109   | 154570   | 150824  | 276392   | 74587    | 195351  | 776219  | 329222   | 405227   | 374535   | 373800   | 242309   | 381501   | 307588   | 672282   | 309715   |   |
| EIC     | Negative | 265.1480 | 1.73 | unknown | 0        | 1245112  | 49170    | 323795   | 392475   | 0       | 283634   | 24880    | 412545  | 0       | 26399    | 977718   | 834758   | 0        | 0        | 0        | 0        | 0        | 2094644  |   |
| EIC     | Negative | 400.2192 | 3.36 | unknown | 1463945  | 968827   | 1505977  | 1322867  | 329404   | 379273  | 621786   | 345391   | 394678  | 1919109 | 1158907  | 942528   | 841026   | 1088705  | 508164   | 1045939  | 1025462  | 823391   | 1265444  |   |
| EIC     | Negative | 334.2082 | 2.01 | unknown | 187055   | 245053   | 0        | 36868    | 94562    | 204167  | 0        | 51777    | 174088  | 302876  | 365812   | 138087   | 74357    | 209744   | 174242   | 209401   | 100897   | 179670   | 0        |   |
| EIC     | Negative | 378.2377 | 3.35 | unknown | 1172742  | 418021   | 1382032  | 921163   | 177099   | 220723  | 356428   | 252879   | 240337  | 1979043 | 687558   | 358745   | 475791   | 591837   | 311668   | 599994   | 680132   | 491547   | 738729   |   |
| EIC     | Negative | 243.1604 | 1.52 | unknown | 99600    | 105367   | 560288   | 234833   | 169513   | 122543  | 172047   | 299805   | 84203   | 295904  | 152941   | 121492   | 568141   | 205923   | 317897   | 117960   | 398738   | 842260   | 244405   |   |
| EIC     | Negative | 557.3350 | 2.28 | unknown | 377298   | 0        | 1499109  | 1134560  | 0        | 0       | 1093407  | 9761     | 0       | 1347831 | 0        | 0        | 43200    | 50260    | 53284    | 21571    | 0        | 0        | 2436518  | 0 |
| EIC     | Negative | 317.2123 | 2.91 | unknown | 8632346  | 5773508  | 11217143 | 0        | 3407450  | 0       | 3630454  | 0        | 5044236 | 0       | 0        | 6497301  | 6137784  | 5039640  | 6721895  | 0        | 0        | 0        | 4319357  |   |
| fpHILIC | Positive | 85.0288  | 2.92 | unknown | 690048   | 424691   | 378737   | 147067   | 128756   | 167032  | 284731   | 290765   | 98506   | 294502  | 256155   | 267898   | 278842   | 884399   | 770361   | 264726   | 262061   | 296230   | 625913   |   |
| EIC     | Negative | 423.2219 | 3.92 | unknown | 1340476  | 393348   | 1039818  | 3027263  | 84514    | 132040  | 166725   | 183974   | 79260   | 2190626 | 590120   | 108048   | 59480    | 0        | 213823   | 658761   | 67225    | 453524   | 89756    |   |
| EIC     | Negative | 399.2288 | 2.32 | unknown | 11681634 | 4777645  | 8814762  | 1208464  | 1243972  | 1560286 | 2367613  | 1892833  | 1523369 | 3825813 | 6211485  | 4422935  | 3699167  | 5420332  | 2690919  | 4396785  | 5349431  | 6464436  | 857137   |   |
| EIC     | Negative | 433.2002 | 2.51 | unknown | 606683   | 229008   | 501694   | 695817   | 149739   | 174499  | 344065   | 265621   | 238976  | 1040894 | 440926   | 618216   | 563569   | 528527   | 330573   | 569891   | 444782   | 924507   | 428864   |   |
| EIC     | Negative | 314.1846 | 2.82 | unknown | 154998   | 353620   | 290509   | 623850   | 122772   | 102461  | 145511   | 100497   | 101952  | 270142  | 204947   | 290272   | 241442   | 201514   | 282691   | 262286   | 261000   | 161022   | 365345   |   |
| EIC     | Negative | 364.2036 | 3.92 | unknown | 3529997  | 1035798  | 2833536  | 8277669  | 225006   | 352906  | 405731   | 421952   | 229466  | 6249043 | 1569315  | 246730   | 140601   | 19807    | 538781   | 1747337  | 161475   | 1109290  | 223624   |   |
| EIC     | Negative | 519.2860 | 2.54 | unknown | 807776   | 0        | 1026846  | 549277   | 0        | 0       | 278895   | 0        | 0       | 0       | 0        | 0        | 0        | 0        | 0        | 0        | 0        | 0        | 650248   | 0 |
| EIC     | Negative | 429.1955 | 2.32 | unknown | 1482853  | 466737   | 1003110  | 1581961  | 196211   | 157577  | 299528   | 366164   | 199183  | 2437112 | 526914   | 429897   | 420343   | 542221   | 302480   | 436898   | 525749   | 1028098  | 549883   |   |
| EIC     | Negative | 522.3520 | 2.33 | unknown | 144610   | 59070    | 173079   | 572942   | 15751    | 11847   | 25301    | 33787    | 33787   | 367602  | 52880    | 52420    | 45196    | 24210    | 23518    | 45680    | 52180    | 122380   | 18975    |   |
| EIC     | Negative | 316.1997 | 3.30 | unknown | 1066998  | 847652   | 2644292  | 2000281  | 672474   | 330024  | 175030   | 332475   | 200294  | 1429680 | 1285231  | 1294408  | 533636   | 771019   | 575896   | 950084   | 1239292  | 594698   | 621981   |   |
| EIC     | Negative | 239.2015 | 4.44 | unknown | 301231   | 68685    | 334595   | 180605   | 27263    | 61900   | 126978   | 110517   | 87081   | 168914  | 133614   | 230901   | 227026   | 186195   | 119387   | 140561   | 209488   | 358833   | 140304   |   |
| EIC     | Negative | 494.2490 | 2.18 | unknown | 648536   | 193191   | 0        | 108267   | 91623    | 245192  | 0        | 99680    | 1933221 | 198031  | 162756   | 122270   | 228511   | 90690    | 315434   | 403488   | 0        | 465732   | 0        |   |
| EIC     | Negative | 534.3020 | 2.79 | unknown | 455797   | 10421    | 501617   | 460529   | 0        | 0       | 274931   | 26035    | 221840  | 11866   | 0        | 0        | 0        | 15267    | 0        | 15777    | 0        | 14406    | 0        |   |
| EIC     | Negative | 531.2997 | 2.79 | unknown | 22240738 | 53926    | 27900599 | 21458019 | 59907    | 83994   | 109685   | 11906674 | 416931  | 9396633 | 111432   | 88355    | 253002   | 285952   | 1810899  | 78731    | 89662    | 29077542 | 123205   |   |
| EIC     | Negative | 342.2732 | 6.06 | unknown | 0        | 0        | 224098   | 0        | 0        | 160920  | 0        | 0        | 0       | 0       | 0        | 0        | 0        | 0        | 0        | 0        | 0        | 200232   | 0        |   |
| EIC     | Negative | 511.3643 | 2.86 | unknown | 178187   | 69287    | 0        | 56373    | 74739    | 68761   | 64348    | 0        | 14557   | 133981  | 61116    | 55001    | 47543    | 62442    | 63235    | 87730    | 71938    | 244207   | 56130    |   |
| EIC     | Negative | 627.4999 | 6.86 | unknown | 89478    | 287294   | 116815   | 283135   | 105809   | 108112  | 187582   | 89108    | 155082  | 291708  | 701595   | 267747   | 451272   | 965636   | 268501   | 247297   | 430451   | 101876   | 479283   |   |
| EIC     | Negative | 531.2832 | 0.89 | unknown | 161770   | 5371     | 188985   | 179601   | 33149    | 25857   | 346212   | 15022    | 13941   | 590456  | 5260     | 12480    | 0        | 14648    | 5585     | 11103    | 1019434  | 9183     | 0        |   |
| EIC     | Negative | 364.2134 | 3.22 | unknown | 568641   | 192237   | 1956237  | 721078   | 111385   | 170484  | 181596   | 186884   | 195081  | 209670  | 191426   | 270683   | 264870   | 206670   | 115272   | 264640   | 1047017  | 366414   | 209612   |   |
| fpHILIC | Positive | 202.1086 | 0.57 | unknown | 890251   | 885429   | 164761   | 141914   | 353106   | 797020  | 255960   | 0        | 398267  | 840563  | 611927   | 486472   | 317641   | 10117792 | 2245586  | 473875   | 466036   | 646330   | 640133   |   |
| EIC     | Negative | 583.3806 | 5.19 | unknown | 158161   | 0        | 247465   | 796449   | 0        | 332239  | 0        | 867261   | 912193  | 196201  | 0        | 0        | 0        | 0        | 194609   | 975924   | 294263   | 814690   | 1033503  |   |
| EIC     | Negative | 565.3028 | 3.69 | unknown | 87853    | 135768   | 354143   | 222745   | 122774   | 56380   | 80479    | 515285   | 293355  | 240196  | 179751   | 177751   | 0        | 0        | 0        | 0        | 0        | 350561   | 0        |   |
| EIC     | Negative | 552.2981 | 2.43 | unknown | 87643    | 0        | 229883   | 74586    | 0        | 0       | 146874   | 0        | 161842  | 0       | 0        | 0        | 0        | 0        | 0        | 0        | 0        | 0        | 0        |   |
| EIC     | Negative | 409.2225 | 1.73 | unknown | 3832646  | 905438   | 2069217  | 2083733  | 90619    | 140763  | 218103   | 105553   | 210282  | 4651915 | 807830   | 588970   | 351197   | 684077   | 303346   | 571976   | 556937   | 0        | 508246   |   |
| EIC     | Negative | 479.3745 | 5.33 | unknown | 2057292  | 1406788  | 1637182  | 2024314  | 704653   | 963479  | 699844   | 1055773  | 815642  | 2866550 | 2890776  | 1989160  | 1713886  | 1682916  | 1853289  | 2432313  | 1908843  | 2375195  | 1587208  |   |
| EIC     | Negative | 503.2983 | 4.03 | unknown | 1842698  | 997167   | 1607227  | 631921   | 181675   | 273992  | 55575    | 34291    | 173819  | 0       | 0        | 67716    | 485770   | 0        | 1127566  | 0        | 92074    | 143504   | 712331   |   |
| EIC     | Negative | 507.1702 | 2.44 | unknown | 341773   | 70701    | 42023    | 164932   | 9309     | 24044   | 29112    | 20819    | 30314   | 218157  | 57189    | 57095    | 31170    | 56690    | 24739    | 43603    | 58032    | 101908   | 43980    |   |
| fpHILIC | Positive | 317.2124 | 0.44 | unknown | 4788285  | 1711637  | 7606033  | 4637844  | 574754   | 594832  | 1258896  | 892430   | 858011  | 8350926 | 2137096  | 2259541  | 1687500  | 1620230  | 891552   | 1676145  | 2736486  | 1756921  | 3011447  |   |
| EIC     | Negative | 593.6695 | 4.04 | unknown | 112951   | 60386    | 89148    | 76547    | 55571    | 47835   | 43780    | 120388   | 60225   | 199289  | 161108   | 119927   | 126675   | 77911    | 103383   | 132391   | 138861   | 319168   | 96340    |   |
| EIC     | Negative | 427.1984 | 3.84 | unknown | 0        | 91701    | 277402   | 158398   | 0        | 91482   | 183947   | 249306   | 0       | 285385  | 100068   | 154799   | 190907   | 911684   | 201595   | 253858   | 111338   | 513439   | 185533   |   |
| EIC     | Negative | 343.2132 | 3.10 | unknown | 512015   | 187133   | 205957   | 157181   | 260193   | 227521  | 260029   | 158590   | 233213  | 183062  | 192173   | 683106   | 408656   | 248398   | 201285   | 1181459  | 969994   | 226597   | 183661   |   |
| EIC     | Negative | 533.2901 | 2.51 | unknown | 319373   | 92380    | 190980   | 47401    | 57473    | 36821   | 90644    | 0        | 57084   | 208157  | 103115   | 102146   | 104916   | 90949    | 68874    | 115793   | 92538    | 195618   | 114234   |   |
| EIC     | Negative | 373.0721 | 2.85 |         |          |          |          |          |          |         |          |          |         |         |          |          |          |          |          |          |          |          |          |   |

|        |          |          |      |         |           |          |           |           |          |          |          |          |          |           |          |          |          |          |          |          |          |          |          |
|--------|----------|----------|------|---------|-----------|----------|-----------|-----------|----------|----------|----------|----------|----------|-----------|----------|----------|----------|----------|----------|----------|----------|----------|----------|
| EIC    | Negative | 319.2189 | 3.36 | unknown | 4145495   | 1496297  | 5505340   | 3527075   | 461160   | 557132   | 916500   | 570305   | 607783   | 7208026   | 2259302  | 1678176  | 1503866  | 1944440  | 720851   | 1762966  | 1975625  | 1520985  | 2135190  |
| EIC    | Negative | 371.2440 | 4.04 | unknown | 168080    | 96542    | 92012     | 80503     | 148085   | 92418    | 115064   | 62287    | 106864   | 91581     | 96529    | 386344   | 198554   | 106948   | 68303    | 618639   | 483109   | 111890   | 92554    |
| EIC    | Negative | 556.3324 | 2.28 | unknown | 936629    | 23924    | 4826355   | 3470246   | 0        | 0        | 3142117  | 64525    | 4534195  | 120894    | 73431    | 151028   | 192734   | 186122   | 75362    | 97651    | 7971598  | 72161    |          |
| EIC    | Negative | 352.2213 | 1.60 | unknown | 1120260   | 368193   | 520965    | 152564    | 74102    | 117209   | 128321   | 0        | 95431    | 921698    | 265409   | 213870   | 146820   | 223458   | 169533   | 273886   | 320243   | 0        | 324506   |
| EIC    | Negative | 400.2191 | 3.77 | unknown | 401505    | 158356   | 515195    | 694909    | 73960    | 88655    | 108692   | 122316   | 83607    | 860115    | 313750   | 237189   | 224068   | 207529   | 103956   | 193682   | 277845   | 197936   | 480117   |
| EIC    | Negative | 593.8875 | 3.63 | unknown | 1014857   | 556083   | 1384815   | 1033905   | 229210   | 285836   | 473730   | 436238   | 139875   | 1966217   | 1236376  | 898297   | 998783   | 682416   | 251210   | 600430   | 992485   | 831357   | 1475329  |
| EIC    | Negative | 311.2124 | 3.36 | unknown | 133065984 | 53155091 | 177553786 | 107588994 | 15730004 | 17476157 | 32955443 | 17783407 | 18794620 | 251039758 | 73891464 | 55161274 | 46228487 | 62470846 | 24598967 | 61410410 | 66855315 | 46116022 | 74405608 |
| EIC    | Negative | 318.2156 | 3.36 | unknown | 29454914  | 11776013 | 3931866   | 23570309  | 3475234  | 3847270  | 7302487  | 3937756  | 4137000  | 54895049  | 16150368 | 12174842 | 10192811 | 13666595 | 5374465  | 13636419 | 14902720 | 10101839 | 16388836 |
| EIC    | Negative | 444.9849 | 0.49 | unknown | 7176350   | 6115632  | 8270621   | 7883594   | 283136   | 333742   | 352215   | 320997   | 8931442  | 8169813   | 591456   | 6914850  | 8293524  | 2342659  | 5422472  | 314359   | 6209151  | 7941434  | 7350455  |
| EIC    | Negative | 437.1702 | 3.36 | unknown | 194535    | 119367   | 224853    | 267729    | 44387    | 71587    | 109172   | 75092    | 83518    | 583334    | 265583   | 187932   | 192954   | 229488   | 101107   | 239491   | 232196   | 177800   | 273811   |
| fpHLIC | Negative | 401.1302 | 3.53 | unknown | 65269     | 1176524  | 711074    | 78709     | 132481   | 132035   | 384288   | 197149   | 933016   | 55474     | 0        | 93220    | 100903   | 987799   | 113005   | 81146    | 279590   | 95345    | 4249991  |
| EIC    | Negative | 377.2334 | 3.36 | unknown | 4443342   | 1603505  | 5739765   | 3599706   | 590964   | 555108   | 1039391  | 578205   | 577611   | 7692979   | 2318087  | 1799558  | 1420045  | 1968674  | 779650   | 1915532  | 2214407  | 1489039  | 2503229  |
| EIC    | Negative | 577.3015 | 5.25 | unknown | 389775    | 1207284  | 295406    | 651554    | 421019   | 675426   | 495230   | 311546   | 386913   | 701653    | 1520210  | 1227333  | 2349904  | 1013297  | 1175276  | 1162396  | 1311805  | 933607   | 1671864  |
| EIC    | Negative | 307.1944 | 3.52 | unknown | 0         | 294418   | 643079    | 0         | 0        | 0        | 0        | 216159   | 734097   | 275007    | 270786   | 0        | 0        | 103726   | 0        | 0        | 486844   | 0        | 0        |
| fpHLIC | Negative | 343.1139 | 3.52 | unknown | 69132     | 1512180  | 875759    | 125214    | 165002   | 193953   | 526241   | 268159   | 1255192  | 85942     | 56217    | 164663   | 152030   | 1350423  | 142560   | 109693   | 375797   | 183661   | 5772100  |
| EIC    | Negative | 417.2266 | 2.62 | unknown | 371813    | 284241   | 422639    | 298276    | 71727    | 100450   | 143436   | 0        | 83517    | 714790    | 300129   | 219932   | 224554   | 265210   | 144206   | 207059   | 354745   | 0        | 388875   |
| EIC    | Negative | 318.2155 | 3.05 | unknown | 379114    | 106613   | 861680    | 327497    | 77975    | 54986    | 87860    | 98827    | 72051    | 976050    | 315975   | 121751   | 158157   | 162318   | 92621    | 206551   | 269670   | 323614   | 185091   |
| EIC    | Negative | 557.3354 | 2.39 | unknown | 459689    | 25608    | 26411920  | 3161525   | 15499    | 8765     | 0        | 1402135  | 36294    | 3181297   | 107212   | 97277    | 115741   | 202452   | 155144   | 71476    | 70790    | 3670986  | 59020    |
| EIC    | Negative | 334.2109 | 2.32 | unknown | 12532996  | 5265640  | 9282483   | 12610844  | 1370369  | 1657307  | 2626669  | 2236417  | 1682535  | 21710495  | 6597181  | 4792480  | 3801336  | 6260234  | 3027137  | 4786893  | 6115751  | 6654404  | 5778729  |
| EIC    | Negative | 294.1792 | 6.03 | unknown | 0         | 676944   | 0         | 909916    | 0        | 0        | 0        | 673121   | 0        | 0         | 0        | 0        | 0        | 966847   | 0        | 0        | 991396   | 0        | 0        |
| EIC    | Negative | 320.2215 | 3.36 | unknown | 420706    | 143540   | 506299    | 300725    | 37397    | 46843    | 83167    | 45051    | 56712    | 726129    | 191480   | 156374   | 116210   | 159253   | 61956    | 190772   | 175050   | 119108   | 198379   |
| EIC    | Negative | 556.3324 | 2.39 | unknown | 1401055   | 87272    | 7216068   | 9464196   | 41830    | 32442    | 25484    | 4117973  | 109194   | 9353239   | 339522   | 260851   | 324959   | 620716   | 446554   | 108493   | 236461   | 10995895 | 171767   |
| EIC    | Negative | 418.2306 | 2.56 | unknown | 452588    | 203915   | 176023    | 324995    | 57342    | 72907    | 87607    | 74587    | 57499    | 697611    | 238203   | 167906   | 149176   | 232601   | 107418   | 183616   | 250755   | 101062   | 330898   |
| EIC    | Negative | 394.2317 | 2.32 | unknown | 2356084   | 1002981  | 1773670   | 2447566   | 2725504  | 304963   | 488417   | 425430   | 298389   | 4227455   | 1345522  | 937130   | 722920   | 1824808  | 571099   | 923697   | 1133833  | 1284943  | 1084529  |
| fpHLIC | Negative | 196.0285 | 1.65 | unknown | 0         | 1145388  | 0         | 738515    | 0        | 0        | 930748   | 0        | 0        | 0         | 0        | 0        | 0        | 1963276  | 1480126  | 1119332  | 0        | 0        | 0        |
| EIC    | Negative | 298.1827 | 5.23 | unknown | 1989241   | 734497   | 2848051   | 1556203   | 421934   | 283591   | 586919   | 541874   | 317103   | 2413936   | 1315053  | 1257879  | 1639458  | 938190   | 461359   | 1129501  | 1345220  | 1001525  | 2097499  |
| EIC    | Negative | 393.2286 | 2.32 | unknown | 9792298   | 4062238  | 7413516   | 10023741  | 1083550  | 1281572  | 2026913  | 1654430  | 1271201  | 17152084  | 5288002  | 3781332  | 3040465  | 4813064  | 2300221  | 3670972  | 4692837  | 5376029  | 4511147  |
| EIC    | Negative | 416.2288 | 6.31 | unknown | 503860    | 1607918  | 223916    | 89780     | 810653   | 1341184  | 78614    | 373994   | 353807   | 177217    | 152661   | 193988   | 254595   | 356913   | 191013   | 3640298  | 325204   | 2188686  | 1989814  |
| EIC    | Negative | 392.2172 | 2.48 | unknown | 319786    | 274850   | 179915    | 350946    | 277433   | 14535    | 0        | 23540    | 205774   | 275075    | 283352   | 0        | 0        | 294223   | 273586   | 304983   | 0        | 16724    |          |
| EIC    | Negative | 415.2256 | 6.31 | unknown | 2156457   | 7147602  | 1127041   | 734511    | 3654924  | 551862   | 453050   | 1557153  | 1872704  | 841464    | 695306   | 7009029  | 1272665  | 1473746  | 773709   | 15638416 | 1261286  | 9815596  | 9315981  |
| EIC    | Negative | 364.2038 | 3.72 | unknown | 538734    | 135867   | 347127    | 1407586   | 0        | 69944    | 35099    | 0        | 29221    | 1455436   | 254035   | 46305    | 0        | 0        | 40224    | 203641   | 0        | 79995    | 56002    |
| EIC    | Negative | 381.2565 | 5.44 | unknown | 164350    | 118693   | 0         | 0         | 0        | 165134   | 0        | 0        | 0        | 0         | 0        | 0        | 0        | 0        | 112519   | 203519   | 0        | 0        | 151380   |
| EIC    | Negative | 297.1865 | 5.23 | unknown | 9352001   | 3582844  | 13002719  | 6649572   | 1613882  | 1313690  | 2944177  | 2304619  | 1375002  | 10990205  | 6023978  | 5758637  | 7347202  | 4298937  | 2104112  | 5030012  | 6383456  | 4198167  | 9340088  |
| fpHLIC | Negative | 342.1124 | 3.53 | unknown | 331284    | 6949079  | 4239270   | 471153    | 728478   | 791619   | 2505636  | 1167524  | 5196321  | 345728    | 227588   | 629058   | 621502   | 6237731  | 565510   | 466857   | 1536621  | 668371   | 26198768 |
| EIC    | Negative | 333.1356 | 2.96 | unknown | 322726    | 25367    | 396131    | 45095     | 12955    | 21285    | 10756    | 10756    | 66400    | 36432     | 0        | 65812    | 0        | 259483   | 0        | 0        | 40496    | 0        | 31284    |
| EIC    | Negative | 297.1720 | 3.84 | unknown | 115983    | 77681    | 116210    | 77649     | 20231    | 33590    | 53821    | 0        | 52557    | 84300     | 96023    | 117954   | 162665   | 103583   | 151309   | 101181   | 80999    | 51374    | 69550    |
| EIC    | Negative | 385.2383 | 5.69 | unknown | 902730    | 309776   | 745539    | 469160    | 254171   | 184615   | 274215   | 501470   | 136787   | 860037    | 708855   | 490884   | 336014   | 389516   | 1012502  | 171896   | 591289   | 953551   | 490873   |
| EIC    | Negative | 471.3448 | 5.84 | unknown | 301353    | 106497   | 520615    | 318083    | 26117    | 84214    | 66701    | 114604   | 58114    | 398483    | 167770   | 211476   | 134244   | 69933    | 409957   | 168555   | 157144   | 100263   | 165482   |
| EIC    | Negative | 433.2210 | 1.60 | unknown | 359463    | 136649   | 0         | 0         | 25810    | 0        | 0        | 31759    | 274071   | 108607    | 109188   | 67333    | 96462    | 73458    | 105451   | 146179   | 0        | 140654   | 0        |
| EIC    | Negative | 534.3884 | 3.37 | unknown | 66888     | 51103    | 206847    | 800469    | 0        | 12737    | 20863    | 33613    | 37397    | 315125    | 73423    | 98909    | 36412    | 15531    | 0        | 51976    | 71234    | 105436   | 71096    |
| EIC    | Negative | 554.3152 | 2.79 | unknown | 1663266   | 0        | 3786176   | 7863643   | 120092   | 131700   | 0        | 4637974  | 328163   | 4723282   | 526450   | 443310   | 371720   | 701076   | 610641   | 371160   | 474607   | 12294836 | 448439   |
| EIC    | Negative | 317.2122 | 3.05 | unknown | 1493576   | 582539   | 3918054   | 1528109   | 263587   | 296903   | 382293   | 354452   | 325170   | 4301725   | 1443349  | 582194   | 790967   | 711557   | 429143   | 869334   | 1188153  | 1302010  | 882061   |
| EIC    | Negative | 318.2157 | 4.53 | unknown | 1124233   | 357302   | 1554061   | 909948    | 235376   | 100874   | 317103   | 147840   | 182325   | 2116299   | 582344   | 672675   | 193426   | 400884   | 136228   | 599955   | 789076   | 569888   | 589531   |
| EIC    | Negative | 629.3853 | 2.89 | unknown | 1565274   | 815366   | 2111879   | 1542715   | 301522   | 89719    | 413202   | 268650   | 127253   | 1603966   | 493237   | 774204   | 631783   | 657962   | 548137   | 1023147  | 1006631  | 642489   | 379081   |
| EIC    | Negative | 555.3184 | 2.79 | unknown | 605721    | 15087    | 1322960   | 2793058   | 29256    | 34427    | 0        | 1514896  | 123376   | 3037514   | 969417   | 743153   | 656248   | 866275   | 489465   | 717793   | 960584   | 440586   | 1164718  |
| EIC    | Negative | 546.3193 | 3.25 | unknown | 1236729   | 0        | 2786954   | 1367831   | 0        | 0        | 830655   | 28839    | 1687445  | 167445    | 11356    | 0        | 30093    | 33682    | 0        | 0        | 0        | 2492023  | 9705     |
| EIC    | Negative | 336.2265 | 2.62 | unknown | 2080878   | 844068   | 2206113   | 1444343   | 188021   | 290204   | 391324   | 175814   | 250902   | 3037514   | 969417   | 743153   | 656248   | 866275   | 489465   | 717793   | 960584   | 440586   | 1164718  |
| EIC    | Negative | 415.1919 | 3.36 | unknown | 586961    | 81688    | 792802    | 674142    | 132006   | 138185   | 273900   | 175223   | 177470   | 1873072   | 661531   | 517626   | 445106   | 634721   | 239629   | 615315   | 631481   | 418883   | 714999   |
| EIC    | Negative | 309.0626 | 0.49 | unknown | 628240    | 326521   | 0         | 0         | 0        | 0        | 238508   | 0        | 0        | 0         | 0        | 0        | 0        | 236951   | 0        | 0        | 367221   | 0        | 330574   |
| EIC    | Negative | 635.4327 | 4.14 | unknown | 451170    | 309122   | 495547    | 343052    | 46601    | 42963    | 131897   | 74800    | 77237    | 178807    | 135868   | 404888   | 337205   | 141860   | 306225   | 252312   | 218252   | 177098   | 150306   |
| EIC    |          |          |      |         |           |          |           |           |          |          |          |          |          |           |          |          |          |          |          |          |          |          |          |

|        |          |          |      |         |          |          |          |          |          |         |         |         |          |          |         |         |         |          |         |          |          |          |          |         |
|--------|----------|----------|------|---------|----------|----------|----------|----------|----------|---------|---------|---------|----------|----------|---------|---------|---------|----------|---------|----------|----------|----------|----------|---------|
| EIC    | Negative | 393.2286 | 2.44 | unknown | 9955067  | 2385420  | 10599369 | 6452590  | 556385   | 766513  | 1197225 | 935004  | 918612   | 17463809 | 3599208 | 2364954 | 1772343 | 3416825  | 1015307 | 2881799  | 3496602  | 3433995  | 3161406  |         |
| EIC    | Negative | 334.2109 | 2.44 | unknown | 14797171 | 3491393  | 15763421 | 9489561  | 859059   | 1054326 | 1792861 | 1401598 | 1382805  | 25683097 | 5388526 | 3433050 | 2557040 | 5163482  | 1565924 | 4398188  | 5339182  | 4926429  | 4638357  |         |
| fpHLIC | Positive | 360.1497 | 3.53 | unknown | 794857   | 22525682 | 13514578 | 1255584  | 1835191  | 2240935 | 8260221 | 3176757 | 17786320 | 905324   | 588544  | 1964193 | 2023313 | 20852010 | 1706093 | 1468073  | 4455295  | 1737214  | 98346760 |         |
| EIC    | Negative | 315.2538 | 3.45 | unknown | 192801   | 0        | 299552   | 953131   | 0        | 0       | 0       | 0       | 0        | 87141    | 79606   | 167920  | 1015629 | 967489   | 1012069 | 0        | 0        | 985508   | 923893   | 1013525 |
| EIC    | Negative | 445.2007 | 3.92 | unknown | 1110018  | 356665   | 786502   | 2240266  | 13863    | 118535  | 24859   | 82256   | 87414    | 2065974  | 322072  | 75336   | 25363   | 0        | 108515  | 519752   | 16967    | 363886   | 57615    |         |
| EIC    | Negative | 630.3858 | 2.89 | unknown | 778953   | 422187   | 983330   | 733733   | 117146   | 17448   | 203571  | 115102  | 78938    | 539602   | 184815  | 375064  | 282873  | 236017   | 255086  | 502618   | 506418   | 310594   | 166959   |         |
| EIC    | Negative | 354.2352 | 3.31 | unknown | 63774    | 52338    | 70667    | 53839    | 46113    | 72131   | 58045   | 59388   | 57832    | 51513    | 69396   | 69971   | 63878   | 14829    | 53298   | 724393   | 62975    | 55928    | 65085    |         |
| EIC    | Negative | 314.2420 | 6.40 | unknown | 7431503  | 3443869  | 7254149  | 409892   | 286087   | 3804534 | 443805  | 429838  | 415640   | 5070975  | 2997314 | 2989659 | 2680032 | 136083   | 3553015 | 2741176  | 2924481  | 5798679  | 2665662  |         |
| EIC    | Negative | 413.2003 | 3.77 | unknown | 551277   | 244183   | 960064   | 968055   | 77631    | 99799   | 150887  | 140841  | 114652   | 1556200  | 500596  | 357601  | 342293  | 355576   | 129826  | 132709   | 460773   | 178917   | 918142   |         |
| EIC    | Negative | 394.2318 | 2.44 | unknown | 2419040  | 587221   | 2656593  | 1561386  | 135945   | 182605  | 291508  | 227396  | 218911   | 4213260  | 872418  | 582755  | 424740  | 845042   | 239921  | 714332   | 883303   | 883384   | 783226   |         |
| EIC    | Negative | 314.1845 | 1.88 | unknown | 0        | 326213   | 0        | 0        | 0        | 454586  | 0       | 0       | 0        | 0        | 0       | 0       | 0       | 0        | 503875  | 487640   | 518504   | 0        | 0        |         |
| EIC    | Negative | 469.3320 | 5.49 | unknown | 790758   | 255987   | 1161561  | 833690   | 114948   | 121034  | 121983  | 181203  | 108064   | 1264931  | 410543  | 528821  | 335768  | 254580   | 923187  | 337008   | 309928   | 194437   | 412776   |         |
| EIC    | Negative | 469.2961 | 6.00 | unknown | 1106541  | 1090291  | 1368720  | 1480701  | 215321   | 107731  | 239994  | 206994  | 143217   | 835913   | 555139  | 683243  | 251186  | 389268   | 580729  | 933045   | 237111   | 987966   | 338862   |         |
| fpHLIC | Positive | 599.2869 | 0.35 | unknown | 80857    | 135985   | 408483   | 249959   | 86870    | 70197   | 106033  | 206045  | 61356    | 446051   | 225587  | 249247  | 122840  | 230268   | 64565   | 130349   | 256460   | 1291636  | 46127    |         |
| fpHLIC | Positive | 171.0760 | 1.64 | unknown | 174647   | 1470022  | 0        | 1622308  | 0        | 0       | 1704657 | 0       | 0        | 0        | 1919947 | 1994448 | 0       | 1606922  | 2201375 | 2818002  | 734943   | 0        | 0        |         |
| EIC    | Negative | 516.3085 | 3.75 | unknown | 3584329  | 15939    | 4492251  | 2759386  | 0        | 35090   | 29408   | 1076937 | 59613    | 1379306  | 38109   | 11569   | 64252   | 96775    | 50473   | 0        | 13522    | 3953753  | 54578    |         |
| EIC    | Negative | 397.2513 | 2.56 | unknown | 418572   | 203265   | 353215   | 330110   | 35096    | 49958   | 64153   | 26675   | 28861    | 716576   | 169780  | 108455  | 122469  | 139460   | 95816   | 134430   | 168633   | 56470    | 241650   |         |
| EIC    | Negative | 429.1960 | 2.44 | unknown | 2078783  | 424324   | 1997862  | 1397869  | 106954   | 120432  | 121639  | 216841  | 197078   | 3249886  | 632098  | 214193  | 258276  | 586774   | 117917  | 509305   | 617665   | 832330   | 521261   |         |
| EIC    | Negative | 633.4078 | 3.76 | unknown | 888959   | 0        | 114773   | 1113458  | 0        | 0       | 188576  | 0       | 0        | 0        | 0       | 0       | 15303   | 47267    | 0       | 298048   | 0        | 345073   | 0        |         |
| EIC    | Negative | 313.1815 | 3.43 | unknown | 713647   | 407150   | 1145333  | 1148133  | 131743   | 158658  | 174532  | 181524  | 167798   | 2293685  | 1092304 | 667588  | 369170  | 572653   | 294189  | 444485   | 645117   | 137814   | 1221217  |         |
| EIC    | Negative | 407.2061 | 1.92 | unknown | 0        | 138995   | 0        | 0        | 82387    | 39516   | 0       | 0       | 49971    | 0        | 138520  | 146465  | 265630  | 74811    | 162078  | 133989   | 171741   | 0        | 123758   |         |
| EIC    | Negative | 318.2156 | 3.77 | unknown | 3548826  | 1616349  | 5819517  | 6285135  | 503648   | 560432  | 995138  | 739925  | 620268   | 9393547  | 2985526 | 2084266 | 1996597 | 2067352  | 732901  | 1519407  | 2801821  | 1229340  | 5579801  |         |
| EIC    | Negative | 322.1778 | 3.43 | unknown | 480669   | 453569   | 525062   | 0        | 0        | 574817  | 0       | 0       | 0        | 0        | 612925  | 0       | 0       | 0        | 338350  | 0        | 633562   | 982394   | 51762    |         |
| EIC    | Negative | 431.1845 | 2.44 | unknown | 604861   | 109046   | 665043   | 586269   | 54975    | 65695   | 101443  | 147149  | 85811    | 2670571  | 331437  | 216633  | 168379  | 338870   | 127803  | 319129   | 363104   | 479239   | 301831   |         |
| EIC    | Negative | 335.2232 | 2.56 | unknown | 37198661 | 12423423 | 24884391 | 26558503 | 2513936  | 3677927 | 4955763 | 2561336 | 2953817  | 57790513 | 1498578 | 9929221 | 8849383 | 12917015 | 6553237 | 10949034 | 14454893 | 6257207  | 20427009 |         |
| EIC    | Negative | 628.3532 | 4.93 | unknown | 0        | 8576817  | 0        | 0        | 0        | 0       | 3422330 | 0       | 0        | 0        | 0       | 0       | 8760829 | 0        | 0       | 0        | 0        | 0        | 12094239 |         |
| EIC    | Negative | 336.2265 | 2.56 | unknown | 8312192  | 2742705  | 5495568  | 5925994  | 543857   | 815325  | 1117306 | 544226  | 650798   | 12849892 | 3307182 | 2154759 | 1953429 | 2862810  | 1441381 | 2415213  | 3214406  | 1401549  | 4506395  |         |
| EIC    | Negative | 335.0233 | 2.14 | unknown | 123132   | 72890    | 156386   | 0        | 72726    | 279921  | 42618   | 0       | 10179    | 96425    | 634417  | 319838  | 158423  | 142556   | 68098   | 164341   | 837073   | 80443    | 125466   |         |
| EIC    | Negative | 634.4181 | 3.76 | unknown | 367518   | 107372   | 1070902  | 555712   | 17365    | 39047   | 75063   | 50995   | 40460    | 500818   | 118061  | 158398  | 165699  | 145123   | 58583   | 141093   | 199666   | 139964   | 255599   |         |
| EIC    | Negative | 397.1999 | 6.36 | unknown | 0        | 131135   | 571390   | 0        | 228999   | 0       | 0       | 0       | 41532    | 392233   | 286283  | 0       | 241587  | 0        | 171509  | 256662   | 216734   | 320044   | 0        |         |
| EIC    | Negative | 495.3694 | 3.73 | unknown | 88128    | 83467    | 94288    | 164273   | 47197    | 85067   | 50902   | 75855   | 39323    | 508645   | 298485  | 132217  | 96952   | 138726   | 156659  | 259379   | 125796   | 395898   | 130064   |         |
| EIC    | Negative | 410.2258 | 1.73 | unknown | 963749   | 210667   | 488960   | 689843   | 21791    | 24816   | 12595   | 64758   | 31087    | 1312625  | 192172  | 180013  | 109684  | 178060   | 78301   | 169519   | 151846   | 0        | 156072   |         |
| EIC    | Negative | 334.2180 | 2.26 | unknown | 555174   | 155736   | 2894221  | 3516130  | 256543   | 70140   | 542987  | 277364  | 83741    | 8616442  | 171952  | 1030414 | 661589  | 1434798  | 493961  | 166349   | 146466   | 1365081  | 2276579  |         |
| EIC    | Negative | 316.1999 | 3.46 | unknown | 1657681  | 760786   | 2240968  | 2648608  | 190394   | 183177  | 302385  | 257296  | 304180   | 4629709  | 1333763 | 970240  | 765699  | 874029   | 339685  | 769310   | 1116823  | 482441   | 2066216  |         |
| EIC    | Negative | 633.4164 | 3.76 | unknown | 1007460  | 239782   | 1891035  | 1319819  | 40631    | 38128   | 123125  | 76158   | 1004382  | 314506   | 399040  | 407955  | 295533  | 0        | 71683   | 317121   | 446077   | 406567   | 576584   |         |
| EIC    | Negative | 559.4022 | 3.36 | unknown | 184400   | 56850    | 199575   | 120317   | 0        | 18112   | 20141   | 0       | 139249   | 1615130  | 64207   | 56368   | 24496   | 55131    | 0       | 31750    | 80461    | 0        | 27139    |         |
| EIC    | Negative | 369.1855 | 2.33 | unknown | 804883   | 319947   | 673176   | 787340   | 41315    | 86906   | 34228   | 75660   | 1684868  | 20897710 | 6043273 | 4287382 | 3565041 | 4124357  | 1510201 | 3334131  | 5178036  | 2012171  | 9506921  |         |
| EIC    | Negative | 315.1967 | 3.45 | unknown | 7399665  | 3385179  | 10144624 | 12471082 | 845875   | 859785  | 1688468 | 1089782 | 1286812  | 20897710 | 6043273 | 4287382 | 3565041 | 4124357  | 1510201 | 3334131  | 5178036  | 2012171  | 9506921  |         |
| EIC    | Negative | 509.2386 | 1.59 | unknown | 1556164  | 395343   | 1457695  | 633651   | 272179   | 0       | 453491  | 0       | 0        | 4242346  | 633687  | 470659  | 2672243 | 2437056  | 256996  | 909277   | 1480439  | 956822   | 1012803  |         |
| EIC    | Negative | 395.2441 | 2.56 | unknown | 10737298 | 3595226  | 6748250  | 7713670  | 684603   | 1012327 | 1323534 | 633586  | 809796   | 16746074 | 4274874 | 2672243 | 2437056 | 3573652  | 1831234 | 3153613  | 4093872  | 1788873  | 5948379  |         |
| EIC    | Negative | 417.2264 | 2.56 | unknown | 1809515  | 809290   | 635148   | 1075700  | 184813   | 251949  | 333575  | 0       | 0        | 2793282  | 973289  | 618647  | 875529  | 462038   | 1641783 | 6665131  | 916828   | 523085   | 1017644  |         |
| EIC    | Negative | 479.2650 | 2.33 | unknown | 1322025  | 295653   | 2719707  | 2854078  | 75554    | 97575   | 127891  | 157929  | 89274    | 4594125  | 646262  | 386967  | 217542  | 310747   | 107711  | 389384   | 441367   | 470125   | 669885   |         |
| EIC    | Negative | 528.3011 | 2.36 | unknown | 1412204  | 7399     | 2330039  | 5369256  | 32397    | 32373   | 0       | 2719472 | 78976    | 5309966  | 123444  | 77232   | 123273  | 158112   | 158112  | 88228    | 147454   | 10358379 | 105678   |         |
| EIC    | Negative | 431.3015 | 3.03 | unknown | 0        | 141630   | 0        | 0        | 0        | 0       | 0       | 0       | 143372   | 0        | 59041   | 134862  | 131942  | 0        | 0       | 142839   | 127752   | 145374   | 130529   |         |
| EIC    | Negative | 397.2000 | 6.23 | unknown | 0        | 206377   | 166105   | 0        | 194668   | 0       | 0       | 0       | 0        | 0        | 127430  | 0       | 219950  | 0        | 100907  | 290803   | 194546   | 163394   | 0        |         |
| EIC    | Negative | 315.1825 | 2.36 | unknown | 615076   | 112535   | 92454    | 89700    | 155936   | 98806   | 163923  | 101693  | 109717   | 86483    | 155843  | 294461  | 52750   | 227961   | 215640  | 465986   | 1604869  | 99665    | 97596    |         |
| EIC    | Negative | 396.2471 | 2.56 | unknown | 2624333  | 869739   | 1579205  | 1859322  | 166805   | 254332  | 308656  | 108315  | 196542   | 4155022  | 1059679 | 660307  | 614440  | 853201   | 435790  | 768067   | 1009416  | 434491   | 1442181  |         |
| EIC    | Negative | 470.2991 | 6.00 | unknown | 351607   | 345360   | 457284   | 488919   | 74068    | 0       | 89249   | 65930   | 26174    | 285043   | 167788  | 225853  | 76714   | 107066   | 185449  | 314917   | 101099   | 314258   | 99241    |         |
| EIC    | Negative | 397.2000 | 3.46 | unknown | 555977   | 307054   | 742696   | 807019   | 74511    | 70792   | 141930  | 85747   | 99578    | 1570166  | 495704  | 348891  | 287922  | 363591   | 136489  | 273123   | 445055   | 163963   | 863049   |         |
| EIC    | Negative | 335.2230 | 2.32 | unknown | 1839443  | 186328   | 1409057  | 1815244  | 100430   | 129032  | 142289  | 377141  | 254190   | 0        | 969460  | 691944  | 560589  | 0        | 495277  | 719732   | 890217   | 1082461  | 859241   |         |
| EIC    | Negative | 377.2337 | 3.77 | unknown | 784192   | 170802   | 1382020  | 1465741  | 130383</ |         |         |         |          |          |         |         |         |          |         |          |          |          |          |         |





|         |          |          |      |         |          |           |          |          |          |          |          |          |          |          |          |          |          |          |          |          |          |          |          |
|---------|----------|----------|------|---------|----------|-----------|----------|----------|----------|----------|----------|----------|----------|----------|----------|----------|----------|----------|----------|----------|----------|----------|----------|
| EIC     | Negative | 403.2491 | 3.78 | unknown | 204517   | 242218    | 240241   | 234920   | 226074   | 240747   | 248200   | 245503   | 240905   | 210241   | 183784   | 217686   | 230532   | 227021   | 244251   | 240247   | 216866   | 253950   | 255669   |
| EIC     | Negative | 355.2432 | 2.35 | unknown | 469998   | 503350    | 421434   | 130457   | 446269   | 478152   | 497944   | 466272   | 464457   | 451041   | 465683   | 489186   | 478385   | 461440   | 489891   | 491959   | 485982   | 411927   | 492298   |
| EIC     | Negative | 398.9667 | 3.09 | unknown | 118035   | 193145    | 112766   | 107032   | 154043   | 156857   | 158100   | 95646    | 171065   | 107977   | 186166   | 150103   | 174887   | 146878   | 179208   | 174887   | 143816   | 110267   | 133502   |
| EIC     | Negative | 369.1915 | 2.71 | unknown | 535412   | 398617    | 248013   | 326213   | 353494   | 401109   | 378544   | 579824   | 387547   | 494152   | 344999   | 369168   | 384822   | 395449   | 430354   | 303860   | 447211   | 447956   | 491593   |
| EIC     | Negative | 306.2521 | 6.50 | unknown | 4880112  | 8442364   | 7383492  | 10686355 | 8155410  | 7427013  | 9970169  | 9277789  | 9277839  | 7279491  | 10916329 | 8913068  | 9855206  | 8020363  | 8224504  | 8001896  | 11224788 | 9039869  | 8944949  |
| EIC     | Negative | 356.2472 | 2.48 | unknown | 2919432  | 3657704   | 2201597  | 2722219  | 3763772  | 3534958  | 3619616  | 3728545  | 3624573  | 3624889  | 3685622  | 3645485  | 3679958  | 3839868  | 3778243  | 3538998  | 3707112  | 3618272  | 3893954  |
| fpHILIC | Positive | 302.0705 | 3.39 | unknown | 319848   | 490514    | 545422   | 5572920  | 513990   | 545264   | 552426   | 530263   | 467509   | 675879   | 496039   | 474411   | 512714   | 466556   | 516360   | 528611   | 579932   | 463874   | 518579   |
| fpHILIC | Negative | 178.0752 | 0.94 | unknown | 1909941  | 1960316   | 1750585  | 1651470  | 1976577  | 1710699  | 1843465  | 1946185  | 1973417  | 1818610  | 1939493  | 1706416  | 1664812  | 1956027  | 2027543  | 2050752  | 1841743  | 1685033  | 1937854  |
| fpHILIC | Positive | 177.0659 | 0.96 | unknown | 593175   | 543624    | 306060   | 395975   | 1047908  | 1243529  | 728312   | 381797   | 957125   | 624584   | 1048830  | 706493   | 893577   | 538549   | 1012042  | 920485   | 1203778  | 306836   | 931927   |
| EIC     | Negative | 540.2730 | 2.71 | unknown | 551618   | 526597    | 303541   | 348400   | 422408   | 723976   | 365543   | 378241   | 954488   | 452292   | 392107   | 563860   | 387430   | 332013   | 495227   | 689278   | 780498   | 231641   | 676759   |
| EIC     | Negative | 358.2625 | 2.35 | unknown | 3294868  | 3593779   | 3121402  | 3282894  | 3410718  | 3428078  | 3738474  | 3439263  | 3474158  | 3181630  | 3614800  | 3541473  | 3519684  | 3580548  | 3564247  | 3483023  | 3670496  | 3227242  | 3730292  |
| EIC     | Negative | 535.2869 | 5.23 | unknown | 483301   | 468141    | 436578   | 510771   | 518173   | 402466   | 457955   | 577674   | 567439   | 528164   | 424002   | 507842   | 440186   | 522057   | 487727   | 511322   | 501489   | 555394   | 494547   |
| fpHILIC | Positive | 133.0799 | 3.37 | unknown | 40373180 | 36694776  | 24584342 | 23011768 | 29421860 | 37514816 | 26654468 | 31839122 | 32885296 | 21552510 | 24215452 | 29311344 | 33118436 | 35060372 | 35510652 | 38773112 | 27787442 | 36303444 | 21634336 |
| EIC     | Negative | 283.0614 | 2.17 | unknown | 303226   | 325358    | 271978   | 316079   | 296432   | 287532   | 308717   | 359096   | 303867   | 351789   | 251922   | 324577   | 295171   | 339381   | 271110   | 335511   | 207990   | 338472   | 356416   |
| EIC     | Negative | 320.2856 | 4.00 | unknown | 617045   | 631603    | 595160   | 564092   | 633441   | 605727   | 600369   | 590498   | 590511   | 578579   | 599871   | 579822   | 586605   | 588165   | 597251   | 610539   | 658353   | 600728   | 587950   |
| EIC     | Negative | 441.1884 | 3.65 | unknown | 612700   | 672834    | 510961   | 615671   | 641629   | 602922   | 576829   | 665511   | 669227   | 647599   | 618411   | 627788   | 601042   | 611953   | 610959   | 613370   | 577931   | 723874   | 666904   |
| EIC     | Negative | 309.0628 | 1.55 | unknown | 608366   | 708220    | 444652   | 317446   | 819379   | 929412   | 796617   | 340834   | 204104   | 442045   | 810567   | 653342   | 528724   | 534345   | 855257   | 466995   | 649901   | 341936   | 813826   |
| EIC     | Negative | 502.3992 | 6.59 | unknown | 1125002  | 1132656   | 1045180  | 1112392  | 1597405  | 1073207  | 2147885  | 1678600  | 2545181  | 1433207  | 1365838  | 1108547  | 1057233  | 1570580  | 1877124  | 2479978  | 1388476  | 1059080  | 2044185  |
| EIC     | Negative | 365.2334 | 0.91 | unknown | 36114    | 59639     | 19770    | 32754    | 78362    | 84605    | 54850    | 44655    | 56633    | 26898    | 68440    | 20309    | 69773    | 80975    | 85437    | 106023   | 31796    | 55862    | 43957    |
| fpHILIC | Positive | 235.0798 | 3.14 | unknown | 1726674  | 2184128   | 1836542  | 1721070  | 1933748  | 1706723  | 1897362  | 2056193  | 2039225  | 1686780  | 2008466  | 1988947  | 2218270  | 2144213  | 2015796  | 1746407  | 1898184  | 1892203  | 3230623  |
| EIC     | Negative | 552.2709 | 4.72 | unknown | 1298600  | 1449582   | 1081564  | 1214879  | 2490362  | 2684138  | 1834251  | 1868554  | 2836012  | 1429475  | 2216046  | 2100600  | 1664929  | 3013664  | 2347148  | 2804238  | 1885102  | 1596327  | 3230623  |
| fpHILIC | Positive | 136.0392 | 0.95 | unknown | 571695   | 633921    | 274518   | 302265   | 985454   | 1325769  | 720842   | 341102   | 983004   | 501440   | 918237   | 739443   | 479875   | 957244   | 921658   | 1222594  | 343437   | 967479   |          |
| EIC     | Negative | 320.2856 | 3.75 | unknown | 586924   | 597312    | 567036   | 558752   | 606633   | 585336   | 557815   | 586026   | 548620   | 565198   | 589780   | 560216   | 560983   | 557862   | 582481   | 583416   | 556550   | 600009   | 599478   |
| EIC     | Negative | 647.2346 | 1.85 | unknown | 174770   | 97105     | 0        | 91100    | 62546    | 153347   | 0        | 77220    | 0        | 0        | 119343   | 119382   | 130596   | 73333    | 95181    | 135942   | 93670    | 0        | 64546    |
| EIC     | Negative | 554.3473 | 5.47 | unknown | 6146279  | 9460952   | 6181041  | 7203029  | 7990235  | 8228526  | 7662010  | 6538423  | 10389907 | 6940574  | 9622117  | 9106951  | 9325528  | 9604708  | 8861363  | 8696197  | 8149799  | 5963677  | 9686904  |
| EIC     | Negative | 337.2328 | 2.48 | unknown | 1837162  | 1849785   | 1557664  | 1847368  | 1967312  | 1803494  | 1985965  | 1804628  | 1837201  | 1927169  | 1894327  | 1936051  | 1915998  | 1998385  | 1927979  | 1837563  | 1929437  | 1793497  | 2043521  |
| fpHILIC | Positive | 142.9384 | 4.62 | unknown | 365826   | 399502    | 410322   | 434914   | 458970   | 484291   | 513941   | 471992   | 510451   | 503324   | 633213   | 470201   | 489057   | 456442   | 511208   | 473242   | 517473   | 484143   | 487493   |
| fpHILIC | Positive | 134.0808 | 3.15 | unknown | 802907   | 634638    | 513206   | 397649   | 717444   | 988293   | 804279   | 354082   | 382164   | 516185   | 715223   | 600114   | 616185   | 472352   | 793912   | 810037   | 552368   | 704191   | 425194   |
| EIC     | Negative | 528.2733 | 4.82 | unknown | 1277112  | 1227834   | 1007509  | 1035417  | 2341952  | 2442946  | 1720422  | 1860475  | 1574281  | 1191761  | 1782451  | 1860189  | 1318272  | 2041256  | 1961475  | 1954623  | 1762484  | 1602713  | 2800887  |
| fpHILIC | Positive | 134.0808 | 3.36 | unknown | 3649530  | 3528567   | 2154352  | 1933583  | 2511526  | 3588422  | 2737924  | 2823033  | 3281621  | 2038559  | 2194832  | 2835810  | 3041785  | 3162081  | 3556322  | 3636540  | 2684881  | 3384119  | 1896436  |
| EIC     | Negative | 192.0338 | 2.68 | unknown | 482024   | 556879    | 428909   | 561328   | 557306   | 686046   | 549727   | 482265   | 409577   | 498690   | 525975   | 552215   | 503032   | 558655   | 515828   | 594973   | 615117   | 461506   | 536449   |
| EIC     | Negative | 341.0343 | 1.19 | unknown | 800220   | 319595    | 269542   | 280570   | 301632   | 371484   | 349203   | 259564   | 293111   | 289008   | 465958   | 336342   | 292201   | 332192   | 324253   | 268136   | 324210   | 307153   | 374887   |
| EIC     | Negative | 280.0222 | 1.19 | unknown | 81447    | 82431     | 83392    | 89431    | 91830    | 94639    | 90292    | 87572    | 98574    | 79584    | 123893   | 97103    | 87794    | 88744    | 91347    | 82038    | 88868    | 90542    | 104877   |
| EIC     | Negative | 506.3231 | 5.40 | unknown | 1535961  | 1627914   | 1516306  | 1407811  | 1579975  | 1690566  | 1438392  | 1671046  | 1474916  | 1414643  | 1470221  | 1662891  | 1602294  | 1419630  | 1567162  | 1544059  | 1603593  | 1571765  | 1686532  |
| EIC     | Negative | 421.2253 | 0.86 | unknown | 344345   | 1144708   | 399255   | 381892   | 1480257  | 1699632  | 1169993  | 1871193  | 1432098  | 1360473  | 169271   | 733560   | 1222807  | 898568   | 1945373  | 1158634  | 1205465  | 1554146  |          |
| fpHILIC | Negative | 221.1819 | 0.42 | unknown | 206289   | 631098    | 168215   | 294125   | 443051   | 372192   | 184580   | 118091   | 1410657  | 149701   | 216381   | 372758   | 909372   | 333031   | 335648   | 861320   | 271802   | 205309   | 895458   |
| EIC     | Negative | 322.6719 | 6.53 | unknown | 5419706  | 5664689   | 5430692  | 9568074  | 6045562  | 9323355  | 9383389  | 8572974  | 9464156  | 8106695  | 1103261  | 9038858  | 10366107 | 9368268  | 7985898  | 8895760  | 10366753 | 9496993  | 678354   |
| EIC     | Negative | 427.2713 | 1.07 | unknown | 37678    | 67726     | 60971    | 96205    | 81677    | 108861   | 59638    | 68221    | 52358    | 82200    | 78436    | 43989    | 94821    | 60416    | 77205    | 101105   | 55741    | 108497   | 33469    |
| EIC     | Negative | 395.2441 | 2.93 | unknown | 1990925  | 2288617   | 1490033  | 1544406  | 2042422  | 1956387  | 1852259  | 2491718  | 1938268  | 2591231  | 2312821  | 1767541  | 2118549  | 1656523  | 2279135  | 1982687  | 2039467  | 2412749  | 2419245  |
| fpHILIC | Positive | 449.0766 | 4.29 | unknown | 371695   | 514154    | 198553   | 300454   | 543713   | 629583   | 532817   | 249455   | 585970   | 280651   | 465005   | 558305   | 611664   | 623337   | 604121   | 618964   | 566538   | 282810   | 1519497  |
| EIC     | Negative | 534.2823 | 5.23 | unknown | 1910342  | 1593220   | 1642525  | 2042657  | 1974955  | 1617661  | 1688967  | 2042021  | 2063800  | 1907277  | 1690087  | 1839556  | 1675319  | 1962203  | 1818907  | 1911064  | 1878281  | 2111476  | 1843928  |
| fpHILIC | Negative | 558.3308 | 0.60 | unknown | 3612882  | 4131781   | 2848237  | 3138096  | 3810978  | 3432246  | 3373626  | 3312035  | 4530729  | 3253028  | 4092870  | 3860268  | 4094957  | 3757005  | 3951279  | 4203561  | 3568589  | 2538432  | 4355756  |
| EIC     | Negative | 135.2513 | 3.44 | unknown | 970424   | 1032004   | 957804   | 921851   | 1042707  | 1030095  | 1007526  | 1016040  | 963039   | 822552   | 946372   | 1037452  | 1151473  | 1066640  | 914418   | 1128476  | 1020293  | 1062202  |          |
| fpHILIC | Positive | 234.0768 | 3.14 | unknown | 21679124 | 26734658  | 24904478 | 23128458 | 26447202 | 22876672 | 24560252 | 25980778 | 24925550 | 26086018 | 27080294 | 26129484 | 26106356 | 28377216 | 27950452 | 25139918 | 24360114 | 24046254 | 25758180 |
| EIC     | Negative | 297.2436 | 5.66 | unknown | 2754088  | 1984092   | 2314170  | 2004018  | 2482510  | 2702477  | 2165871  | 2296231  | 2588568  | 1926010  | 1994340  | 2212092  | 2219515  | 2505516  | 1804810  | 3211764  | 2331348  | 2725301  | 2406918  |
| EIC     | Negative | 237.0766 | 1.86 | unknown | 133038   | 143699    | 0        | 0        | 135643   | 126593   | 125067   | 0        | 123156   | 0        | 115459   | 121870   | 112419   | 126398   | 130133   | 129489   | 129035   | 0        | 132138   |
| EIC     | Negative | 226.1193 | 1.81 | unknown | 138445   | 163496    | 413506   | 0        | 118436   | 168073   | 195726   | 350132   | 122761   | 334110   | 190440   | 185755   | 435537   | 222675   | 278265   | 165922   | 378368   | 0        | 249300   |
| fpHILIC | Positive | 258.1095 | 3.32 | unknown | 47834332 | 120580872 |          |          |          |          |          |          |          |          |          |          |          |          |          |          |          |          |          |

|         |          |          |      |         |           |          |          |          |           |           |           |          |           |           |          |           |           |           |           |           |           |           |           |
|---------|----------|----------|------|---------|-----------|----------|----------|----------|-----------|-----------|-----------|----------|-----------|-----------|----------|-----------|-----------|-----------|-----------|-----------|-----------|-----------|-----------|
| fpHILIC | Positive | 184.0737 | 3.68 | unknown | 7261435   | 4802447  | 3296431  | 5441937  | 5718998   | 8983337   | 4868197   | 4000154  | 5428157   | 3487946   | 3624435  | 6731425   | 4060351   | 3970699   | 5173772   | 7038304   | 5655527   | 6335233   | 5870453   |
| fpHILIC | Positive | 224.1119 | 2.53 | unknown | 473528    | 334682   | 259696   | 373274   | 346938    | 463257    | 311868    | 263999   | 501787    | 278791    | 367468   | 423659    | 421540    | 304593    | 397976    | 480854    | 216641    | 365910    | 445715    |
| fpHILIC | Positive | 148.0964 | 2.65 | unknown | 1708708   | 1976781  | 1931575  | 2219460  | 2416507   | 2519712   | 1916066   | 1288946  | 2377836   | 2383952   | 2286855  | 2506709   | 2268743   | 2066422   | 2547246   | 2491573   | 1796400   | 2013595   | 2028424   |
| EIC     | Negative | 621.2952 | 5.33 | unknown | 399372    | 3219505  | 2309198  | 3015751  | 3794866   | 4836397   | 4342038   | 3198467  | 4001666   | 2356982   | 4447630  | 4615355   | 5001878   | 4710357   | 3885822   | 4392439   | 4313940   | 3195079   | 5089661   |
| fpHILIC | Negative | 130.0228 | 0.76 | unknown | 79496     | 730195   | 119277   | 51859    | 426682    | 576652    | 111086    | 83742    | 33574     | 74513     | 67899    | 319507    | 90725     | 72689     | 292100    | 303435    | 64308     | 282871    | 332072    |
| EIC     | Negative | 361.1953 | 6.22 | unknown | 28205     | 298088   | 0        | 328711   | 172256    | 178088    | 190661    | 59576    | 303759    | 154185    | 205776   | 183238    | 237341    | 137005    | 160677    | 200337    | 219091    | 177590    | 179733    |
| EIC     | Negative | 346.1591 | 1.92 | unknown | 0         | 211035   | 0        | 0        | 356963    | 358780    | 391950    | 0        | 293838    | 362080    | 262169   | 862054    | 264801    | 271235    | 448551    | 396171    | 375243    | 0         | 233893    |
| EIC     | Negative | 319.1539 | 4.91 | unknown | 351437    | 0        | 0        | 0        | 400239    | 0         | 207950    | 0        | 0         | 0         | 0        | 0         | 0         | 0         | 0         | 415217    | 0         | 0         | 0         |
| EIC     | Negative | 382.2967 | 5.78 | unknown | 1693562   | 1713796  | 1708568  | 2240685  | 1903362   | 2070502   | 2024991   | 2200774  | 1775253   | 1935792   | 2046580  | 1889085   | 1989127   | 1589473   | 1985251   | 1892088   | 2242490   | 2380633   | 1857609   |
| fpHILIC | Negative | 165.0403 | 3.19 | unknown | 5391668   | 4015530  | 3272984  | 5300110  | 4546126   | 6450810   | 6284696   | 3826049  | 5588175   | 3890095   | 5472910  | 5742929   | 4925308   | 6635170   | 4771767   | 6594855   | 6032729   | 4729394   | 5585442   |
| EIC     | Negative | 492.1835 | 2.72 | unknown | 823054    | 1022228  | 1004201  | 879785   | 926659    | 1017905   | 1163145   | 893056   | 913626    | 888901    | 1059286  | 992477    | 1146669   | 1107506   | 1118371   | 1078949   | 1080700   | 788148    | 1036144   |
| EIC     | Negative | 427.3207 | 6.62 | unknown | 821602    | 400102   | 681415   | 893328   | 507849    | 584907    | 1236597   | 989144   | 508340    | 593270    | 706026   | 531387    | 618652    | 640304    | 640304    | 1043671   | 650310    | 649729    | 989994    |
| fpHILIC | Positive | 389.1795 | 3.34 | unknown | 355133    | 1227486  | 297745   | 229735   | 723020    | 968365    | 798729    | 260743   | 779812    | 121520    | 487862   | 675849    | 641857    | 962053    | 721201    | 1046850   | 643025    | 430169    | 825932    |
| EIC     | Positive | 480.3082 | 5.30 | unknown | 783562    | 1230851  | 1472147  | 1117814  | 905571    | 1189551   | 1189757   | 1209357  | 1080916   | 1045496   | 918347   | 1232526   | 870760    | 2148259   | 1633966   | 1212602   | 1316853   | 657949    | 1688567   |
| EIC     | Negative | 298.2469 | 5.66 | unknown | 553569    | 410742   | 454713   | 429566   | 501885    | 537216    | 393575    | 485512   | 518499    | 386663    | 399997   | 445380    | 478977    | 502571    | 377113    | 629184    | 464170    | 576587    | 485567    |
| EIC     | Negative | 268.1556 | 2.28 | unknown | 478081    | 369343   | 355648   | 572447   | 452320    | 432696    | 520118    | 354239   | 534173    | 115651    | 432424   | 496281    | 469065    | 304898    | 551913    | 594741    | 387485    | 542108    | 277727    |
| EIC     | Negative | 250.1448 | 2.30 | unknown | 1650521   | 1405725  | 728812   | 1671599  | 1650215   | 2470614   | 1666445   | 819544   | 980727    | 1717767   | 1176106  | 1612404   | 1941089   | 1516230   | 916192    | 1862790   | 1990176   | 1587987   | 1377878   |
| EIC     | Negative | 245.1757 | 3.08 | unknown | 68894     | 74396    | 79298    | 79298    | 108690    | 66306     | 99626     | 117291   | 109700    | 97976     | 92083    | 122471    | 91732     | 98047     | 118065    | 94835     | 127680    | 105356    | 75458     |
| EIC     | Negative | 344.2315 | 4.74 | unknown | 141073    | 155163   | 80513    | 252535   | 232410    | 136556    | 206179    | 111791   | 398072    | 133518    | 132682   | 143638    | 195000    | 46304     | 197630    | 296552    | 254399    | 160534    | 209905    |
| EIC     | Negative | 443.1565 | 2.05 | unknown | 1509082   | 4916774  | 1435811  | 1153794  | 3875641   | 4269225   | 4343424   | 921446   | 3366378   | 1924906   | 4127528  | 3462396   | 4028022   | 4687860   | 5300197   | 4035094   | 4237946   | 958206    | 2915336   |
| fpHILIC | Positive | 104.0709 | 3.03 | unknown | 7143600   | 10056730 | 7203646  | 14000275 | 10718520  | 8881030   | 7340426   | 7065207  | 12295511  | 6794799   | 10616970 | 7224964   | 6840526   | 7609128   | 8443105   | 10564196  | 10650668  | 11208530  | 7286316   |
| EIC     | Positive | 334.1637 | 2.64 | unknown | 248167    | 212735   | 168135   | 252114   | 260022    | 375447    | 225207    | 139870   | 175319    | 273391    | 277048   | 283585    | 215157    | 114237    | 342402    | 290657    | 298991    | 131586    | 142897    |
| EIC     | Negative | 306.2521 | 6.57 | unknown | 280998    | 413874   | 292924   | 471358   | 457882    | 462138    | 549269    | 479099   | 602291    | 426985    | 598033   | 517238    | 702618    | 380502    | 477120    | 420694    | 626520    | 599868    | 528918    |
| EIC     | Negative | 437.2459 | 2.15 | unknown | 248541    | 923473   | 235005   | 466723   | 846231    | 346456    | 808962    | 415796   | 873735    | 648363    | 305433   | 932357    | 282158    | 649204    | 402965    | 865603    | 448042    | 582657    | 1030749   |
| EIC     | Negative | 239.1288 | 2.81 | unknown | 2953803   | 3802920  | 2246064  | 2274588  | 3595228   | 4068086   | 4016281   | 2491985  | 3279630   | 3482752   | 5004553  | 3056552   | 3406302   | 3750339   | 3736347   | 3902095   | 3667514   | 3000113   | 3824536   |
| EIC     | Negative | 410.2640 | 1.88 | unknown | 193880    | 181886   | 0        | 0        | 178346    | 356874    | 134318    | 0        | 120265    | 0         | 270161   | 228137    | 290517    | 182605    | 177129    | 235973    | 165907    | 0         | 243833    |
| EIC     | Negative | 289.1236 | 3.79 | unknown | 280961    | 325430   | 267580   | 299758   | 286761    | 295851    | 299084    | 296308   | 288611    | 275034    | 285922   | 293989    | 308461    | 303965    | 305220    | 312753    | 304321    | 305527    | 304787    |
| EIC     | Negative | 409.2607 | 1.29 | unknown | 147603    | 85881    | 23996    | 0        | 111415    | 418402    | 84228     | 0        | 84729     | 219347    | 154415   | 161714    | 101186    | 137403    | 200133    | 86251     | 146148    | 0         | 295882    |
| fpHILIC | Negative | 135.0298 | 2.95 | unknown | 104463200 | 82146112 | 48396156 | 67554736 | 11796296  | 113023080 | 116406760 | 8730176  | 143457056 | 49557732  | 68662744 | 103952752 | 89533784  | 130326384 | 149534128 | 100333192 | 126608944 | 99949616  | 126732792 |
| EIC     | Negative | 528.3073 | 4.33 | unknown | 689759    | 796208   | 582289   | 567127   | 646262    | 811974    | 832156    | 657925   | 668241    | 625329    | 693155   | 740250    | 673366    | 586247    | 695135    | 746067    | 1084745   | 679262    | 566274    |
| EIC     | Negative | 619.3466 | 3.37 | unknown | 574167    | 486788   | 210998   | 190515   | 341684    | 818949    | 445466    | 531483   | 470335    | 117437    | 421753   | 752152    | 488602    | 101961    | 548876    | 670325    | 687759    | 91829     | 721978    |
| EIC     | Negative | 444.1593 | 2.05 | unknown | 347508    | 1119666  | 331318   | 216541   | 870854    | 966707    | 977578    | 120242   | 785793    | 276061    | 928129   | 754608    | 981822    | 1038698   | 1272578   | 903655    | 922812    | 147373    | 638688    |
| fpHILIC | Negative | 303.0586 | 2.99 | unknown | 1050187   | 541418   | 271302   | 463291   | 781122    | 547002    | 736739    | 545590   | 1023496   | 322124    | 339756   | 536607    | 493702    | 507948    | 663571    | 1029347   | 991487    | 643565    | 796625    |
| EIC     | Negative | 374.2572 | 1.43 | unknown | 0         | 764781   | 0        | 0        | 750288    | 760822    | 758395    | 0        | 969420    | 0         | 745869   | 734668    | 759145    | 786135    | 786265    | 737543    | 798017    | 0         | 748030    |
| EIC     | Negative | 265.1481 | 4.60 | unknown | 12337519  | 8145373  | 6458934  | 12988198 | 22164619  | 8161774   | 10681223  | 5385874  | 9986019   | 7589326   | 4645069  | 7922366   | 6832678   | 5739859   | 5144700   | 15376665  | 19898174  | 8875343   | 9596780   |
| fpHILIC | Negative | 158.0823 | 0.61 | unknown | 3458972   | 3508020  | 2748970  | 3434231  | 3390595   | 6979323   | 4188167   | 1627036  | 4077304   | 2124621   | 2887031  | 3389327   | 3715124   | 2824404   | 7921915   | 4941993   | 3598590   | 1950964   | 7895579   |
| EIC     | Negative | 449.3279 | 2.93 | unknown | 1358900   | 2366466  | 1159259  | 940018   | 2563660   | 1849400   | 2481693   | 1632462  | 4077304   | 2124621   | 2887031  | 3389327   | 3715124   | 2824404   | 7921915   | 4941993   | 3598590   | 1950964   | 7895579   |
| EIC     | Negative | 637.5357 | 4.87 | unknown | 728588    | 688128   | 645418   | 653001   | 672705    | 597602    | 681885    | 683280   | 733980    | 739351    | 683032   | 697258    | 713422    | 666892    | 714615    | 759813    | 709314    | 687696    | 656103    |
| EIC     | Negative | 582.3779 | 6.26 | unknown | 95421077  | 92907853 | 98832937 | 98993128 | 100315507 | 97942784  | 97916488  | 98989186 | 101195688 | 101713056 | 10546004 | 111116738 | 100772512 | 99095223  | 99683887  | 108682237 | 102229619 | 106722595 | 102556630 |
| fpHILIC | Negative | 75.0088  | 0.99 | unknown | 5215589   | 3609970  | 2293433  | 3527811  | 6286309   | 5067443   | 6727734   | 4534932  | 8632596   | 2406899   | 3412118  | 5774811   | 5114117   | 6602071   | 7496547   | 5554930   | 7606300   | 4973549   | 7106667   |
| EIC     | Negative | 279.1252 | 1.97 | unknown | 0         | 39945    | 0        | 0        | 57106     | 49019     | 64015     | 0        | 33968     | 0         | 33968    | 47554     | 44232     | 40660     | 90750     | 60597     | 0         | 42564     |           |
| EIC     | Negative | 409.2608 | 1.88 | unknown | 532750    | 732306   | 0        | 0        | 727198    | 1295075   | 577272    | 0        | 471748    | 0         | 1029073  | 899459    | 1146438   | 754386    | 678789    | 914280    | 678010    | 0         | 949195    |
| EIC     | Negative | 588.4014 | 2.85 | unknown | 0         | 225726   | 199050   | 688996   | 484277    | 334991    | 302923    | 222970   | 519864    | 196573    | 177774   | 348193    | 478545    | 177207    | 151153    | 559528    | 495841    | 566390    | 182625    |
| EIC     | Negative | 347.1274 | 0.89 | unknown | 71947     | 59850    | 66103    | 75530    | 65622     | 81117     | 73951     | 57955    | 71057     | 86705     | 55344    | 60241     | 65601     | 80123     | 65600     | 67984     | 69894     | 78643     | 84643     |
| EIC     | Negative | 582.2826 | 4.47 | unknown | 556167    | 491016   | 489197   | 524465   | 532572    | 403886    | 477941    | 507910   | 672346    | 564439    | 467676   | 485073    | 481084    | 573625    | 546096    | 604787    | 558939    | 584836    | 430113    |
| EIC     | Negative | 327.1812 | 2.28 | unknown | 313770    | 201499   | 360303   | 205459   | 233185    | 266248    | 223413    | 405105   | 129995    | 371710    | 159524   | 291497    | 148883    | 324797    | 203210    | 189343    | 186221    | 558829    | 183469    |
| EIC     | Negative | 268.2365 | 6.50 | unknown | 1093488   | 1251044  | 1862749  | 2195886  | 1854436   | 1396507   | 2020360   | 2453819  | 2476953   | 1535064   | 1712137  | 2005491   | 2316187   | 1955542   | 1651744   | 2405131   | 2025080   | 2506031   | 1748864   |
| fpHILIC | Positive | 243.0518 | 2.63 | unknown | 745603    | 2124634  | 1891247  | 1225443  | 1515682   | 1684938   | 1862163   | 1335161  | 1345830   | 1358901   | 1821944  | 1636347   | 1484931   | 1726519   | 2017725   | 1484851   | 1479901   | 1501060   | 1674110   |
| fpHILIC | Negative | 205.0352 | 0.96 | unknown | 847652    | 5        |          |          |           |           |           |          |           |           |          |           |           |           |           |           |           |           |           |



|         |          |          |      |         |          |          |          |          |          |          |          |          |           |           |          |          |           |          |          |           |           |           |          |
|---------|----------|----------|------|---------|----------|----------|----------|----------|----------|----------|----------|----------|-----------|-----------|----------|----------|-----------|----------|----------|-----------|-----------|-----------|----------|
| EIC     | Negative | 227.1285 | 1.00 | unknown | 70342    | 73985    | 67210    | 71647    | 68743    | 71841    | 71279    | 73172    | 64692     | 66369     | 72493    | 75387    | 68980     | 68419    | 70834    | 75334     | 76494     | 80413     | 68893    |
| EIC     | Negative | 240.1323 | 2.81 | unknown | 381527   | 552496   | 298453   | 392385   | 527598   | 594521   | 582909   | 358920   | 476845    | 497778    | 729961   | 542045   | 516682    | 542870   | 543786   | 591092    | 556654    | 470107    | 542900   |
| fpHILIC | Negative | 160.0615 | 1.61 | unknown | 185581   | 0        | 2275990  | 0        | 2826103  | 195932   | 541132   | 2019171  | 2616208   | 2909964   | 324969   | 0        | 3064907   | 3185108  | 0        | 3068474   | 2374294   | 3291270   | 3291270  |
| EIC     | Negative | 422.1593 | 3.11 | unknown | 532409   | 389224   | 479359   | 388205   | 532384   | 498383   | 540307   | 440404   | 576412    | 475050    | 494934   | 455562   | 473709    | 651750   | 495217   | 668654    | 468651    | 479772    | 633502   |
| EIC     | Negative | 528.3216 | 3.87 | unknown | 997927   | 2143147  | 1014573  | 1139420  | 1570430  | 2010704  | 1821382  | 1297698  | 1498956   | 1434631   | 1964594  | 2087536  | 1892959   | 2195358  | 1997996  | 1759032   | 1674192   | 1603446   | 1698029  |
| EIC     | Negative | 266.1517 | 4.60 | unknown | 1693230  | 1179456  | 893313   | 1835537  | 3192292  | 1089044  | 1492697  | 767506   | 1387740   | 1012129   | 642716   | 1171013  | 957664    | 809993   | 733042   | 2116450   | 2906201   | 1328357   | 1363907  |
| EIC     | Negative | 424.1563 | 3.11 | unknown | 178885   | 138525   | 162171   | 132187   | 173056   | 179052   | 190817   | 152453   | 210383    | 147772    | 160873   | 151060   | 161178    | 221037   | 194887   | 239652    | 156989    | 156356    | 211730   |
| EIC     | Negative | 412.2708 | 4.04 | unknown | 614595   | 722145   | 430994   | 451494   | 608361   | 577788   | 574356   | 717288   | 576701    | 577539    | 679429   | 585109   | 635523    | 483880   | 713012   | 487585    | 681178    | 677393    | 697730   |
| EIC     | Negative | 269.1406 | 2.72 | unknown | 547118   | 573097   | 368846   | 424400   | 546508   | 563979   | 614543   | 546392   | 532647    | 692762    | 516189   | 464497   | 538892    | 511158   | 614417   | 493845    | 589217    | 632156    | 665522   |
| fpHILIC | Negative | 182.0456 | 0.47 | unknown | 2513888  | 1246067  | 1538800  | 2496021  | 2308880  | 3998720  | 3717276  | 1053442  | 1014981   | 2752395   | 2471384  | 3784726  | 1837967   | 675216   | 1576716  | 1864364   | 2298103   | 1468923   | 5715281  |
| fpHILIC | Negative | 259.1298 | 2.69 | unknown | 2428954  | 2601414  | 2123303  | 1214919  | 2307529  | 3563528  | 2209252  | 981829   | 1465929   | 1779272   | 2535464  | 2463927  | 1789634   | 2844575  | 4380984  | 1754469   | 1602960   | 1224116   | 2293120  |
| fpHILIC | Negative | 867.5579 | 0.43 | unknown | 3847182  | 5497277  | 3277674  | 3258144  | 4818583  | 4355643  | 4029582  | 3275627  | 6327088   | 3803357   | 5557441  | 5217264  | 5720858   | 4876459  | 5234667  | 6050984   | 4863610   | 2907742   | 5339962  |
| fpHILIC | Negative | 391.2860 | 0.38 | unknown | 759852   | 334500   | 565886   | 667633   | 761464   | 722716   | 651971   | 421866   | 265411    | 799648    | 568936   | 672835   | 266218    | 430069   | 613811   | 602630    | 386840    | 962360    | 458617   |
| EIC     | Negative | 429.3342 | 3.69 | unknown | 1282693  | 536040   | 318850   | 422608   | 1453507  | 740084   | 690743   | 324056   | 561191    | 518821    | 673482   | 292564   | 607927    | 536202   | 359833   | 572468    | 1768562   | 882793    | 454829   |
| EIC     | Negative | 382.3773 | 6.94 | unknown | 72705    | 73857    | 71011    | 76010    | 102970   | 71217    | 72233    | 96812    | 108163    | 109889    | 62758    | 169400   | 73268     | 82981    | 68264    | 66482     | 84831     | 182647    | 81698    |
| EIC     | Negative | 511.3642 | 1.91 | unknown | 0        | 124509   | 0        | 176210   | 142663   | 117151   | 142663   | 0        | 148616    | 0         | 116512   | 169400   | 117394    | 113408   | 206423   | 217812    | 94031     | 0         | 108698   |
| EIC     | Negative | 431.2953 | 3.03 | unknown | 109436   | 173824   | 121329   | 123248   | 137610   | 131214   | 127470   | 149654   | 167632    | 115152    | 151150   | 139530   | 151776    | 138716   | 133326   | 148368    | 155571    | 166687    | 161494   |
| EIC     | Negative | 329.1520 | 2.78 | unknown | 1861990  | 1637052  | 1484456  | 1324779  | 1700201  | 1539415  | 2118947  | 1621025  | 1479222   | 1601927   | 1767770  | 1944261  | 1681694   | 2048256  | 1789872  | 2016676   | 1663300   | 2308713   | 2308713  |
| EIC     | Negative | 383.1834 | 6.31 | unknown | 143520   | 0        | 636840   | 501131   | 190278   | 425868   | 227189   | 540377   | 481420    | 521424    | 823862   | 601111   | 303535    | 501715   | 632045   | 400359    | 340652    | 334194    | 295438   |
| EIC     | Negative | 421.1558 | 3.11 | unknown | 2510752  | 1898289  | 2158030  | 1840777  | 2500023  | 2452731  | 2585367  | 2063054  | 2794566   | 2036691   | 2113042  | 2246298  | 3006958   | 2525638  | 3252089  | 2208832   | 2299212   | 3024699   | 3024699  |
| fpHILIC | Negative | 177.0226 | 0.89 | unknown | 1636219  | 1592723  | 1344040  | 1345558  | 1585303  | 2961206  | 1759044  | 1145990  | 1508866   | 1549832   | 2048850  | 1924600  | 1968310   | 1925335  | 1837709  | 2652948   | 1734131   | 1454245   | 1945715  |
| EIC     | Negative | 429.3342 | 3.69 | unknown | 156031   | 156528   | 72800    | 189939   | 143536   | 234300   | 128143   | 185033   | 163448    | 259875    | 191478   | 160643   | 184264    | 131097   | 199374   | 206594    | 147221    | 173286    | 191219   |
| EIC     | Negative | 642.3423 | 3.47 | unknown | 168472   | 292503   | 119877   | 151479   | 235606   | 259459   | 267039   | 124218   | 286673    | 134715    | 257588   | 234022   | 210569    | 162269   | 215556   | 292430    | 280076    | 109970    | 361784   |
| EIC     | Negative | 245.0819 | 1.02 | unknown | 53329    | 56837    | 56753    | 47028    | 53078    | 52286    | 62131    | 56334    | 47005     | 67596     | 53598    | 61434    | 56578     | 54148    | 60167    | 61825     | 57160     | 56879     | 55032    |
| EIC     | Negative | 610.3375 | 2.01 | unknown | 316609   | 677041   | 348542   | 0        | 572428   | 621874   | 700829   | 124693   | 493919    | 0         | 740606   | 817758   | 342940    | 463873   | 505086   | 665409    | 595645    | 0         | 877728   |
| fpHILIC | Negative | 103.0038 | 0.99 | unknown | 3859386  | 2596895  | 1538897  | 2468622  | 4212023  | 3825045  | 4220743  | 3416659  | 5679790   | 1703628   | 2522246  | 3907104  | 3884282   | 4705401  | 5143336  | 3858386   | 5312848   | 3624978   | 5020869  |
| fpHILIC | Negative | 143.0714 | 0.43 | unknown | 663858   | 495239   | 572907   | 828020   | 623921   | 571976   | 744616   | 479700   | 578265    | 602182    | 628420   | 824097   | 999024    | 495925   | 437406   | 964670    | 856125    | 538039    | 428741   |
| EIC     | Negative | 301.0720 | 1.80 | unknown | 230412   | 816059   | 503090   | 0        | 548516   | 523252   | 768179   | 373859   | 456872    | 193733    | 712255   | 147947   | 117694    | 155156   | 383352   | 1982615   | 63490     | 0         | 443596   |
| EIC     | Negative | 345.1713 | 5.57 | unknown | 277969   | 363909   | 171428   | 165832   | 521128   | 277982   | 0        | 262955   | 152578    | 490860    | 29118    | 86713    | 593314    | 0        | 479226   | 183281    | 644328    | 0         | 306652   |
| EIC     | Negative | 264.9975 | 1.92 | unknown | 0        | 268620   | 0        | 0        | 252061   | 205728   | 271827   | 0        | 281755    | 0         | 332056   | 32191    | 386341    | 395086   | 114026   | 294417    | 372823    | 0         | 106652   |
| EIC     | Negative | 413.3013 | 1.97 | unknown | 0        | 147915   | 0        | 0        | 152834   | 126278   | 102273   | 0        | 117604    | 0         | 176374   | 103291   | 125666    | 107055   | 136217   | 131732    | 134865    | 0         | 134205   |
| EIC     | Negative | 299.1143 | 1.43 | unknown | 0        | 222824   | 0        | 0        | 216541   | 192354   | 209481   | 0        | 200721    | 0         | 232970   | 199223   | 240910    | 188791   | 237105   | 182791    | 237652    | 0         | 224626   |
| EIC     | Negative | 357.1686 | 3.72 | unknown | 240500   | 418256   | 170863   | 159758   | 407296   | 271545   | 209455   | 267499   | 310716    | 118279    | 167852   | 223295   | 530243    | 143306   | 267203   | 287423    | 229931    | 254322    | 492082   |
| fpHILIC | Positive | 399.1436 | 3.78 | unknown | 756610   | 487532   | 398489   | 578145   | 517285   | 879750   | 518514   | 412589   | 541271    | 561508    | 584071   | 712105   | 517046    | 573193   | 560899   | 608373    | 624820    | 664917    | 632813   |
| EIC     | Negative | 325.3112 | 6.75 | unknown | 468754   | 522166   | 458199   | 659475   | 969010   | 641472   | 686632   | 614742   | 568410    | 612792    | 694444   | 809598   | 624842    | 501365   | 844784   | 730236    | 684577    | 1118788   | 528005   |
| EIC     | Negative | 281.2383 | 6.47 | unknown | 9442809  | 10838308 | 10036869 | 10102782 | 10065027 | 9015881  | 10664561 | 11184995 | 12574848  | 11447480  | 10312832 | 11540411 | 11496745  | 10930411 | 10258377 | 11784642  | 11968313  | 13535157  | 10154943 |
| EIC     | Negative | 381.3747 | 6.94 | unknown | 242789   | 243915   | 261299   | 273718   | 387743   | 261954   | 274322   | 344589   | 310716    | 118279    | 167852   | 223295   | 530243    | 143306   | 267203   | 287423    | 229931    | 254322    | 492082   |
| EIC     | Negative | 280.2353 | 6.47 | unknown | 83921490 | 95825064 | 89129946 | 89894661 | 89950141 | 78626823 | 92630181 | 99208223 | 110253731 | 100021111 | 91137397 | 98827568 | 101743676 | 97105613 | 8899632  | 102840268 | 106510196 | 120504908 | 88875262 |
| fpHILIC | Negative | 152.0546 | 1.01 | unknown | 385779   | 473713   | 270672   | 177871   | 714214   | 697657   | 233071   | 574646   | 617777    | 585287    | 514357   | 576837   | 412441    | 699949   | 574665   | 901810    | 227094    | 763072    | 763072   |
| EIC     | Negative | 275.2316 | 3.84 | unknown | 203807   | 228566   | 195379   | 199928   | 243381   | 227254   | 197583   | 198786   | 210391    | 203238    | 243392   | 225069   | 221671    | 205418   | 246992   | 225250    | 222910    | 239806    | 227254   |
| EIC     | Negative | 397.1998 | 2.91 | unknown | 4493853  | 5423076  | 4073533  | 4656338  | 4774366  | 4672853  | 5569470  | 4403647  | 5137868   | 43171237  | 5436612  | 5363106  | 5293742   | 5675691  | 5351216  | 5139626   | 5325277   | 5240542   | 5291456  |
| EIC     | Negative | 293.2489 | 6.52 | unknown | 465897   | 556197   | 766945   | 1114838  | 668525   | 645618   | 732416   | 927255   | 1044850   | 754735    | 874509   | 815267   | 1033014   | 893053   | 773566   | 873796    | 1031085   | 941030    | 718201   |
| EIC     | Negative | 239.1077 | 3.33 | unknown | 118210   | 132966   | 125783   | 136921   | 133226   | 154150   | 135512   | 121407   | 111923    | 141074    | 133842   | 164022   | 145096    | 155134   | 141890   | 157762    | 131873    | 147934    | 147934   |
| EIC     | Negative | 320.1261 | 3.84 | unknown | 2839718  | 3979601  | 2620787  | 3870695  | 3857850  | 3980031  | 3768637  | 3193376  | 4219859   | 3500407   | 4007226  | 3733466  | 3793133   | 4373727  | 4341839  | 4371864   | 3794619   | 3829560   | 4226442  |
| EIC     | Negative | 359.1244 | 0.84 | unknown | 200708   | 127421   | 105727   | 179726   | 150844   | 171254   | 164145   | 217003   | 177255    | 128408    | 115606   | 129713   | 200124    | 169894   | 159003   | 229722    | 212417    | 182042    | 182042   |
| fpHILIC | Positive | 216.0552 | 3.63 | unknown | 717573   | 692845   | 454691   | 541319   | 637230   | 943812   | 861091   | 525233   | 1012903   | 483523    | 529863   | 699860   | 667850    | 895286   | 740654   | 746396    | 926811    | 824735    | 1068744  |
| EIC     | Negative | 326.3143 | 6.75 | unknown | 111767   | 126466   | 117226   | 148166   | 228846   | 144393   | 149566   | 178852   | 139303    | 137516    | 155003   | 198652   | 146102    | 120455   | 198667   | 151868    | 159774    | 266338    | 133921   |
| EIC     | Negative | 252.1718 | 1.14 | unknown | 258259   | 255511   | 210942   | 181680   | 215372   | 193715   | 250729   | 288011   | 232171    | 213876    | 275343   | 243324   | 283399    | 207725   | 278136   | 199628    | 272505    | 266461    | 253294   |
| EIC     | Negative | 321.2307 | 3.84 | unknown | 488148   | 62       |          |          |          |          |          |          |           |           |          |          |           |          |          |           |           |           |          |

|         |          |          |      |         |          |          |          |         |          |         |          |          |          |          |          |          |          |          |          |          |          |          |          |
|---------|----------|----------|------|---------|----------|----------|----------|---------|----------|---------|----------|----------|----------|----------|----------|----------|----------|----------|----------|----------|----------|----------|----------|
| EIC     | Negative | 491.3380 | 2.82 | unknown | 376569   | 869218   | 341617   | 538040  | 807479   | 825988  | 605386   | 602765   | 827247   | 677097   | 919003   | 697713   | 831045   | 908844   | 867484   | 833371   | 691399   | 767079   | 868106   |
| fpHILIC | Negative | 133.0346 | 2.95 | unknown | 1403565  | 847080   | 554171   | 821322  | 1373384  | 1248259 | 1229135  | 948084   | 1523401  | 540008   | 628627   | 1212411  | 1042461  | 1570311  | 1692854  | 1308766  | 1328621  | 1125971  | 1486675  |
| EIC     | Negative | 253.1566 | 0.98 | unknown | 157362   | 180092   | 137767   | 128350  | 143868   | 132843  | 166990   | 198668   | 153235   | 144730   | 172672   | 161173   | 123843   | 151126   | 193659   | 135086   | 186406   | 185229   | 173962   |
| EIC     | Negative | 248.1326 | 0.78 | unknown | 147700   | 159029   | 140119   | 137397  | 161337   | 221490  | 208766   | 123226   | 120130   | 153587   | 201956   | 336876   | 262004   | 193804   | 123156   | 293949   | 175822   | 125343   | 251244   |
| EIC     | Negative | 339.1792 | 2.09 | unknown | 57410    | 84510    | 0        | 41399   | 61115    | 85188   | 98044    | 0        | 67684    | 51357    | 57234    | 144145   | 150340   | 86464    | 77321    | 103184   | 88661    | 0        | 76040    |
| EIC     | Negative | 380.2489 | 5.86 | unknown | 166259   | 122952   | 176069   | 187341  | 102968   | 177361  | 146652   | 189213   | 214451   | 189103   | 133780   | 198788   | 160178   | 94240    | 128811   | 286225   | 205856   | 163650   | 160047   |
| EIC     | Negative | 567.5557 | 6.63 | unknown | 3425895  | 7246630  | 6958497  | 1803467 | 12264689 | 8392431 | 10525522 | 13175753 | 14398281 | 10569310 | 10876396 | 12926619 | 9807582  | 16560722 | 12929684 | 12924800 | 16902453 | 11519102 | 10448066 |
| EIC     | Negative | 450.3312 | 2.93 | unknown | 364096   | 702043   | 347725   | 300357  | 747843   | 531629  | 689262   | 480405   | 599986   | 295856   | 565659   | 543901   | 553359   | 550200   | 832671   | 722756   | 717464   | 496336   | 589882   |
| EIC     | Negative | 412.2709 | 4.09 | unknown | 283317   | 317917   | 220364   | 209229  | 268473   | 262657  | 281594   | 331799   | 244437   | 288927   | 345502   | 263858   | 267620   | 234660   | 332020   | 224809   | 344263   | 285090   | 344638   |
| fpHILIC | Positive | 235.1283 | 3.70 | unknown | 389990   | 447822   | 311356   | 294798  | 453976   | 467555  | 364535   | 294617   | 325647   | 348612   | 459772   | 403341   | 317426   | 566639   | 493717   | 462616   | 396212   | 310141   | 439531   |
| EIC     | Negative | 407.1470 | 2.85 | unknown | 92201    | 152645   | 209355   | 239676  | 133044   | 206357  | 171932   | 194226   | 120267   | 306175   | 288262   | 205450   | 123129   | 100514   | 184775   | 173297   | 212862   | 248800   | 71310    |
| EIC     | Negative | 430.1744 | 2.03 | unknown | 278895   | 340665   | 338339   | 224221  | 301533   | 402797  | 566330   | 134827   | 278998   | 266856   | 468058   | 710111   | 422187   | 333395   | 380266   | 573384   | 475251   | 127552   | 302562   |
| fpHILIC | Positive | 219.0756 | 2.62 | unknown | 691775   | 750178   | 746033   | 508798  | 638913   | 765295  | 830419   | 561312   | 693749   | 589233   | 766725   | 741490   | 818700   | 914504   | 968566   | 772690   | 611059   | 726956   | 772112   |
| EIC     | Negative | 430.3375 | 3.69 | unknown | 344764   | 127429   | 35551    | 105392  | 367212   | 203221  | 161059   | 76750    | 151297   | 136822   | 169558   | 80907    | 157907   | 131581   | 91988    | 164849   | 460043   | 226859   | 115369   |
| fpHILIC | Positive | 248.0945 | 3.40 | unknown | 272265   | 217389   | 50654    | 658971  | 347296   | 379976  | 256948   | 172735   | 410331   | 468734   | 299382   | 266246   | 417880   | 92747    | 291938   | 491597   | 501806   | 271488   | 175302   |
| EIC     | Negative | 612.8336 | 0.86 | unknown | 472696   | 1967955  | 860435   | 815571  | 1346835  | 2155132 | 891498   | 967696   | 696902   | 601468   | 1534006  | 1138599  | 1440936  | 1122158  | 1936371  | 1324529  | 1781253  | 979489   | 677585   |
| EIC     | Negative | 276.1888 | 3.72 | unknown | 788816   | 2137861  | 501098   | 628144  | 2146931  | 773888  | 1421041  | 872777   | 1910549  | 406440   | 778325   | 1023146  | 1646592  | 779909   | 1322753  | 1552111  | 1264279  | 1045262  | 2695711  |
| EIC     | Negative | 423.1532 | 3.11 | unknown | 910632   | 661828   | 701809   | 626812  | 861875   | 707434  | 804922   | 861875   | 956864   | 508820   | 809587   | 724330   | 753287   | 1024039  | 889765   | 1219883  | 754397   | 776509   | 1048571  |
| EIC     | Negative | 385.1784 | 3.11 | unknown | 116619   | 91887    | 89484    | 114115  | 152174   | 127791  | 131940   | 88784    | 170585   | 97571    | 108982   | 108796   | 143891   | 156711   | 133919   | 164280   | 125651   | 142886   | 176011   |
| fpHILIC | Negative | 175.0726 | 2.74 | unknown | 314399   | 254129   | 176624   | 273689  | 251421   | 585985  | 274088   | 423511   | 289983   | 217380   | 423511   | 393153   | 343424   | 496318   | 720204   | 398930   | 324257   | 197210   | 502516   |
| fpHILIC | Negative | 230.1036 | 2.74 | unknown | 764598   | 658667   | 440684   | 576551  | 506951   | 927502  | 538819   | 385313   | 758559   | 493950   | 666210   | 654459   | 613355   | 550261   | 710187   | 874854   | 708170   | 453388   | 703727   |
| EIC     | Negative | 251.1483 | 2.30 | unknown | 198385   | 199997   | 72972    | 230942  | 247336   | 354215  | 217914   | 93508    | 144313   | 448160   | 266620   | 274693   | 221441   | 137645   | 265606   | 285088   | 236811   | 219743   | 163563   |
| EIC     | Negative | 425.2561 | 0.86 | unknown | 93596    | 117939   | 100121   | 147684  | 202471   | 303134  | 140902   | 220118   | 130593   | 180604   | 152804   | 91325    | 148120   | 118057   | 187655   | 184023   | 157733   | 428434   | 168655   |
| EIC     | Negative | 371.2440 | 5.69 | unknown | 255735   | 263490   | 202860   | 191740  | 221517   | 198390  | 224904   | 272210   | 237009   | 240637   | 268869   | 229944   | 275939   | 224857   | 248062   | 191359   | 272850   | 286291   | 263284   |
| fpHILIC | Positive | 159.0911 | 2.61 | unknown | 11171388 | 13886672 | 12809254 | 9971223 | 11736143 | 1478389 | 13850490 | 10252377 | 10208445 | 11632699 | 14172910 | 13741187 | 12475249 | 15238026 | 15497219 | 14367478 | 11900292 | 12693830 | 12818812 |
| EIC     | Negative | 613.3353 | 0.86 | unknown | 178289   | 757878   | 339929   | 309581  | 509581   | 809584  | 337464   | 356582   | 339929   | 439800   | 607741   | 440247   | 528293   | 411958   | 728447   | 497801   | 670250   | 359683   | 267901   |
| EIC     | Negative | 365.1978 | 2.58 | unknown | 216303   | 142862   | 0        | 111314  | 87462    | 180631  | 206074   | 20021    | 158721   | 88814    | 141424   | 272423   | 247637   | 143300   | 80778    | 198522   | 150110   | 84621    | 212570   |
| EIC     | Negative | 389.1975 | 2.18 | unknown | 0        | 54559    | 41652    | 52111   | 37744    | 83445   | 63242    | 34663    | 73257    | 30413    | 37411    | 85867    | 74024    | 57051    | 26079    | 74147    | 62445    | 104257   | 58449    |
| fpHILIC | Positive | 124.0587 | 0.92 | unknown | 1234051  | 1674336  | 342471   | 963290  | 2164961  | 2293291 | 1875094  | 646957   | 2784827  | 746297   | 2051522  | 2248737  | 1811505  | 1840132  | 2605095  | 2614869  | 2127197  | 1244180  | 2281217  |
| EIC     | Negative | 502.2714 | 3.87 | unknown | 567739   | 1004175  | 509869   | 604843  | 784526   | 952200  | 938509   | 556486   | 748706   | 711765   | 947538   | 1035487  | 864184   | 1083968  | 997785   | 863486   | 854261   | 854829   | 862183   |
| EIC     | Negative | 396.3926 | 7.00 | unknown | 90206    | 82331    | 83368    | 97671   | 145989   | 72641   | 75336    | 102835   | 123788   | 124826   | 74421    | 157668   | 78302    | 117685   | 112762   | 88351    | 110403   | 183376   | 84830    |
| EIC     | Negative | 310.1663 | 2.77 | unknown | 475156   | 531427   | 252216   | 304675  | 606810   | 498405  | 484582   | 506052   | 475749   | 493710   | 579293   | 505139   | 708229   | 450200   | 576761   | 458149   | 605421   | 584675   | 638681   |
| EIC     | Negative | 344.2887 | 6.63 | unknown | 86437    | 157362   | 125272   | 192065  | 175816   | 179146  | 263155   | 222575   | 255308   | 98850    | 204165   | 244927   | 241255   | 289586   | 225077   | 190957   | 130638   | 274845   | 219945   |
| fpHILIC | Negative | 178.0510 | 0.93 | unknown | 3311755  | 2907221  | 2938052  | 983269  | 2339728  | 5039052 | 2811913  | 2001641  | 2055605  | 1388990  | 3222163  | 2842388  | 2651647  | 3684211  | 4150551  | 2407635  | 2398180  | 2618808  | 6431120  |
| EIC     | Negative | 598.2549 | 4.64 | unknown | 274248   | 387278   | 374112   | 520054  | 600715   | 558683  | 651440   | 711110   | 579677   | 579677   | 574533   | 585811   | 663259   | 677354   | 765480   | 565731   | 754231   | 727830   | 4939229  |
| EIC     | Negative | 237.1088 | 2.78 | unknown | 535853   | 648806   | 251878   | 329121  | 666430   | 568634  | 771684   | 498262   | 636210   | 505562   | 746519   | 691785   | 695717   | 626493   | 746791   | 634669   | 748177   | 607196   | 768915   |
| EIC     | Negative | 327.2180 | 2.23 | unknown | 425427   | 225833   | 382277   | 256046  | 516551   | 244608  | 489781   | 302561   | 489759   | 316551   | 621148   | 619533   | 378275   | 167754   | 605994   | 587022   | 531268   | 493092   |          |
| EIC     | Negative | 270.2159 | 5.73 | unknown | 123685   | 129439   | 116509   | 148550  | 153251   | 146339  | 139007   | 119443   | 116513   | 129616   | 112983   | 117147   | 124118   | 109484   | 107957   | 224616   | 147752   | 133612   | 139610   |
| EIC     | Negative | 339.3181 | 6.71 | unknown | 146866   | 215589   | 147929   | 252754  | 300317   | 213641  | 240124   | 192631   | 247324   | 192631   | 247324   | 296379   | 297806   | 235788   | 296255   | 280576   | 279728   | 279612   | 171406   |
| EIC     | Negative | 275.1656 | 3.72 | unknown | 4304593  | 11327164 | 2587285  | 3409496 | 11303664 | 4048755 | 7466679  | 4547668  | 10193316 | 2241536  | 4260343  | 5278033  | 8893228  | 4141503  | 7207107  | 8218080  | 6708718  | 5636736  | 14278294 |
| EIC     | Negative | 415.1976 | 6.06 | unknown | 0        | 0        | 0        | 0       | 0        | 0       | 0        | 0        | 0        | 0        | 0        | 0        | 0        | 0        | 361427   | 0        | 489661   | 0        | 0        |
| EIC     | Negative | 569.5419 | 6.63 | unknown | 289001   | 615370   | 556133   | 1224966 | 1071064  | 705057  | 859799   | 1075332  | 1176914  | 888866   | 851008   | 1172160  | 800291   | 1547566  | 1014173  | 1084281  | 1449081  | 1033710  | 895701   |
| EIC     | Negative | 447.2058 | 3.11 | unknown | 449976   | 400192   | 316152   | 313975  | 523889   | 488038  | 519678   | 357445   | 584078   | 374492   | 476885   | 447397   | 443379   | 613598   | 494852   | 685866   | 460093   | 448363   | 681562   |
| EIC     | Negative | 416.3009 | 2.64 | unknown | 420581   | 515902   | 419040   | 584036  | 570035   | 659626  | 673570   | 490840   | 586245   | 532318   | 726629   | 695528   | 756218   | 1053181  | 706345   | 739940   | 723009   | 483567   | 687624   |
| fpHILIC | Negative | 125.0179 | 3.34 | unknown | 719989   | 491915   | 471331   | 500808  | 536143   | 596781  | 630333   | 466233   | 583518   | 500616   | 522857   | 493347   | 547072   | 690312   | 691014   | 485174   | 669668   | 660749   | 598465   |
| fpHILIC | Positive | 125.0710 | 2.84 | unknown | 290722   | 415605   | 273028   | 274379  | 318188   | 350294  | 340535   | 268553   | 533803   | 246381   | 348791   | 324307   | 458355   | 266572   | 491204   | 461204   | 397764   | 316051   | 364359   |
| fpHILIC | Positive | 190.0505 | 0.96 | unknown | 1430821  | 1054814  | 802727   | 670161  | 1018684  | 1859217 | 1193237  | 553919   | 437284   | 716801   | 1141582  | 973381   | 758911   | 952814   | 1637796  | 990719   | 1037109  | 818712   | 1193401  |
| EIC     | Negative | 380.2083 | 2.28 | unknown | 232323   | 181609   | 162162   | 232392  | 164919   | 145041  | 166992   | 324069   | 166386   | 269657   | 176561   | 138848   | 183849   | 138819   | 196359   | 164446   | 197253   | 318777   | 209083   |
| fpHILIC | Negative | 478.2937 | 0.51 | unknown | 2944274  | 3567916  | 2382294  | 1454782 | 3173763  | 3754482 |          |          |          |          |          |          |          |          |          |          |          |          |          |

|         |          |          |      |         |           |           |          |          |           |          |           |          |          |          |           |           |           |           |           |           |           |           |           |
|---------|----------|----------|------|---------|-----------|-----------|----------|----------|-----------|----------|-----------|----------|----------|----------|-----------|-----------|-----------|-----------|-----------|-----------|-----------|-----------|-----------|
| EIC     | Negative | 293.1541 | 4.05 | unknown | 362398    | 458669    | 268011   | 257802   | 405318    | 346258   | 304535    | 343340   | 283768   | 267913   | 302582    | 265283    | 327115    | 250008    | 368142    | 380039    | 359911    | 403659    | 401710    |
| EIC     | Negative | 236.1050 | 2.78 | unknown | 3479044   | 4103413   | 2104311  | 2409339  | 3948777   | 3570630  | 4958731   | 3192833  | 3837984  | 3223684  | 4891683   | 4044669   | 4550858   | 3934670   | 4771411   | 3845527   | 4723863   | 3843368   | 4993880   |
| EIC     | Negative | 269.1761 | 2.66 | unknown | 87153     | 147158    | 91384    | 107327   | 98406     | 165288   | 105597    | 122116   | 107484   | 158394   | 168804    | 181840    | 186267    | 77004     | 117986    | 154815    | 164614    | 114267    | 129168    |
| EIC     | Negative | 293.1762 | 2.78 | unknown | 885300877 | 104552788 | 35886893 | 59624776 | 104910929 | 92817219 | 123366257 | 79855168 | 99993757 | 85213213 | 126581390 | 104240113 | 117810089 | 100643480 | 120820425 | 992170664 | 119570247 | 100315475 | 129823247 |
| EIC     | Negative | 474.2630 | 3.81 | unknown | 0         | 1923851   | 1691276  | 1039515  | 1315247   | 2519471  | 1262415   | 1376548  | 719321   | 1080321  | 1866131   | 1144405   | 944354    | 3711928   | 2153413   | 719556    | 1492010   | 1392829   | 2426449   |
| EIC     | Negative | 298.2470 | 5.03 | unknown | 539977    | 373234    | 760522   | 567274   | 625525    | 579643   | 591308    | 583258   | 738007   | 423068   | 353032    | 508773    | 521351    | 411640    | 257530    | 1505600   | 580897    | 841779    | 362331    |
| EIC     | Negative | 377.1970 | 0.90 | unknown | 145411    | 224186    | 130776   | 97593    | 244928    | 141365   | 124782    | 116961   | 136066   | 127055   | 164095    | 52136     | 214785    | 311866    | 220058    | 228827    | 106957    | 131080    | 183673    |
| fpHILIC | Positive | 242.6414 | 4.20 | unknown | 603597    | 234525    | 154162   | 259294   | 602190    | 611149   | 473682    | 438010   | 886635   | 230224   | 263498    | 522256    | 440191    | 611743    | 1036271   | 470982    | 609095    | 466938    | 623643    |
| EIC     | Negative | 297.2436 | 5.03 | unknown | 2701722   | 1777803   | 3550406  | 286475   | 3295723   | 2805048  | 3091653   | 3018870  | 3618190  | 2119251  | 1600772   | 2668008   | 2437892   | 2165461   | 1385058   | 7600901   | 2809038   | 4261514   | 1989372   |
| EIC     | Negative | 579.3586 | 3.65 | unknown | 1074108   | 1216278   | 754723   | 735485   | 1070760   | 1018970  | 939056    | 1161291  | 1012980  | 937365   | 1024913   | 938640    | 1083383   | 796668    | 1202767   | 1076359   | 1078992   | 1235328   | 1321015   |
| EIC     | Negative | 395.3892 | 7.00 | unknown | 236451    | 213470    | 244617   | 258139   | 324182    | 255884   | 232891    | 326484   | 408366   | 454776   | 198877    | 545700    | 221901    | 338735    | 309307    | 236691    | 357340    | 626644    | 236520    |
| fpHILIC | Negative | 279.0540 | 2.95 | unknown | 399114    | 193545    | 46801    | 174578   | 387466    | 332958   | 382793    | 244166   | 593792   | 91522    | 135836    | 334857    | 276441    | 477049    | 594721    | 340532    | 492194    | 368778    | 419642    |
| EIC     | Negative | 365.2340 | 1.77 | unknown | 251995    | 328169    | 185448   | 631604   | 793689    | 277693   | 588861    | 715810   | 539005   | 358189   | 484687    | 262887    | 569605    | 1936896   | 1178957   | 981315    | 512613    | 0         | 657178    |
| fpHILIC | Negative | 102.0561 | 3.03 | unknown | 995406    | 834269    | 890474   | 1188240  | 1331371   | 934242   | 1000386   | 738105   | 1959903  | 961742   | 1560366   | 1007100   | 1021189   | 932627    | 1119033   | 1662347   | 1576210   | 1589297   | 867715    |
| fpHILIC | Positive | 160.1329 | 2.96 | unknown | 69678944  | 59590404  | 51109288 | 45771852 | 70402216  | 91207784 | 74919728  | 49400124 | 63519296 | 58867008 | 121679432 | 79574968  | 95540744  | 71634432  | 79901440  | 94308668  | 78789952  | 55010992  | 91357400  |
| EIC     | Negative | 541.2760 | 2.82 | unknown | 119650    | 207518    | 0        | 98304    | 164855    | 265817   | 149483    | 0        | 324184   | 124260   | 124621    | 191382    | 153425    | 118446    | 209024    | 223469    | 255094    | 127221    | 218945    |
| EIC     | Negative | 533.4012 | 4.98 | unknown | 0         | 0         | 277826   | 0        | 114507    | 0        | 0         | 210444   | 0        | 0        | 0         | 193704    | 0         | 122428    | 0         | 106907    | 115760    | 0         | 149117    |
| EIC     | Negative | 259.1666 | 0.85 | unknown | 124459    | 141938    | 136221   | 104369   | 126445    | 116395   | 137623    | 194166   | 102648   | 120766   | 158831    | 127268    | 188762    | 124634    | 164743    | 131785    | 177380    | 169802    | 131368    |
| EIC     | Negative | 370.1880 | 2.77 | unknown | 160961    | 257543    | 73688    | 127324   | 247892    | 257513   | 232161    | 274160   | 256147   | 242309   | 273705    | 243454    | 251861    | 280989    | 219628    | 313446    | 294247    | 343065    |           |
| EIC     | Negative | 640.2980 | 4.32 | unknown | 308502    | 232130    | 135966   | 493365   | 449672    | 463315   | 541365    | 504612   | 544620   | 592557   | 509615    | 570961    | 495296    | 592557    | 577746    | 580225    | 617258    | 498159    |           |
| fpHILIC | Positive | 280.0917 | 3.31 | unknown | 1828990   | 7688727   | 3530649  | 2574935  | 6051391   | 6716171  | 7280412   | 3509166  | 6565693  | 2667947  | 6263389   | 8365348   | 5889917   | 8736132   | 6307947   | 7751131   | 6334162   | 4801709   | 926371    |
| fpHILIC | Positive | 288.0740 | 3.58 | unknown | 623574    | 597577    | 398343   | 606209   | 434009    | 711176   | 574023    | 376560   | 534657   | 514220   | 467788    | 462783    | 710723    | 386213    | 477216    | 71878     | 680300    | 625855    | 509971    |
| fpHILIC | Negative | 202.0510 | 1.03 | unknown | 25569276  | 24330660  | 26155692 | 15394558 | 20784154  | 29745900 | 20532988  | 20190474 | 23595128 | 24762142 | 23889098  | 20813462  | 20344502  | 34302128  | 28423072  | 26981586  | 27491546  | 24221416  | 24670082  |
| fpHILIC | Negative | 168.0778 | 2.84 | unknown | 1135649   | 1946963   | 1483562  | 1293748  | 1764220   | 1893253  | 1580465   | 1190956  | 2179448  | 1540078  | 1768467   | 1779921   | 1766701   | 1068440   | 1514307   | 2482481   | 2421226   | 1795204   | 1666598   |
| EIC     | Negative | 273.1246 | 1.43 | unknown | 0         | 94596     | 0        | 97535    | 71545     | 92962    | 0         | 87572    | 0        | 113025   | 102686    | 96912     | 139232    | 92800     | 96750     | 108512    | 0         | 103645    |           |
| fpHILIC | Negative | 303.1029 | 2.25 | unknown | 738132    | 201962    | 132356   | 96588    | 272006    | 156661   | 154836    | 154489   | 347233   | 61580    | 108125    | 325939    | 201956    | 161550    | 535790    | 294010    | 395045    | 274927    | 0         |
| EIC     | Negative | 331.1305 | 1.43 | unknown | 0         | 55607     | 0        | 98304    | 71132     | 53885    | 73649     | 0        | 64089    | 0        | 75097     | 84921     | 102766    | 62858     | 99218     | 79237     | 0         | 60773     |           |
| fpHILIC | Positive | 161.1360 | 2.96 | unknown | 6002888   | 5349173   | 4632056  | 4254888  | 6247912   | 7166512  | 6647505   | 4179520  | 5649813  | 4963571  | 10139296  | 6934616   | 8314632   | 6219475   | 6769250   | 7515028   | 7307075   | 5063092   | 7682221   |
| EIC     | Negative | 235.1705 | 5.07 | unknown | 692792    | 403625    | 388529   | 607879   | 649926    | 621595   | 732964    | 684559   | 755380   | 413083   | 379027    | 626780    | 705592    | 550452    | 750008    | 850065    | 847271    | 703671    | 818832    |
| EIC     | Negative | 340.1526 | 1.85 | unknown | 147303    | 88738     | 0        | 0        | 160973    | 215588   | 213237    | 0        | 159117   | 0        | 162845    | 145272    | 187212    | 154898    | 173083    | 298898    | 179214    | 0         | 212909    |
| EIC     | Negative | 287.2232 | 2.83 | unknown | 136301    | 147810    | 452326   | 273578   | 342708    | 320992   | 172341    | 441604   | 171033   | 363449   | 181805    | 185414    | 228888    | 194600    | 218624    | 507815    | 256553    | 523235    | 166082    |
| fpHILIC | Negative | 151.0513 | 1.01 | unknown | 4712569   | 5881986   | 2147374  | 3419208  | 7850953   | 9464513  | 7172906   | 3113918  | 7881182  | 5241257  | 8783524   | 6703786   | 7939764   | 5788775   | 9165814   | 7805479   | 11318270  | 2993506   | 9697990   |
| fpHILIC | Negative | 137.0243 | 0.52 | unknown | 1878485   | 1298251   | 2924232  | 960734   | 1273132   | 2345046  | 2094430   | 1293729  | 1280555  | 1235711  | 2070000   | 1551434   | 2035206   | 1422302   | 1252276   | 1429656   | 2219653   | 2878873   | 1797740   |
| EIC     | Negative | 509.3496 | 2.42 | unknown | 118664    | 67665     | 197657   | 132942   | 313449    | 271625   | 227210    | 122950   | 248833   | 270594   | 169573    | 164108    | 56213     | 250028    | 347809    | 281069    | 165853    | 506972    | 68626     |
| EIC     | Negative | 590.2848 | 4.24 | unknown | 211995    | 238674    | 306317   | 267337   | 291453    | 351669   | 421524    | 328818   | 280232   | 316513   | 269942    | 466989    | 470915    | 428081    | 452089    | 362525    | 381735    | 373096    | 368030    |
| EIC     | Negative | 270.2523 | 6.58 | unknown | 1150140   | 1179017   | 1111880  | 1542923  | 1589348   | 1324657  | 1639095   | 1697475  | 2431089  | 1511491  | 1841915   | 1447589   | 1884660   | 2063753   | 1437435   | 2205519   | 2221481   | 1944109   | 2867749   |
| EIC     | Negative | 558.2816 | 4.68 | unknown | 1928944   | 1455264   | 1645128  | 1979123  | 1861589   | 1352169  | 1678177   | 2091519  | 2368480  | 1820094  | 1797321   | 2044330   | 1626402   | 2133886   | 1994370   | 2073400   | 2234545   | 1440228   | 1470028   |
| EIC     | Negative | 527.2021 | 3.11 | unknown | 146043    | 175209    | 105223   | 144114   | 218594    | 212073   | 216908    | 121337   | 250856   | 130518   | 196750    | 176546    | 176993    | 287757    | 222204    | 281262    | 205407    | 182668    | 291170    |
| EIC     | Negative | 366.2659 | 4.91 | unknown | 220879    | 187858    | 143340   | 152121   | 135368    | 175661   | 188387    | 210629   | 159218   | 156029   | 191842    | 173273    | 203272    | 159554    | 212947    | 190153    | 227497    | 239821    | 123032    |
| EIC     | Negative | 294.2156 | 4.59 | unknown | 220756    | 141479    | 200033   | 243911   | 218027    | 211418   | 251315    | 183294   | 323472   | 164680   | 148665    | 165808    | 163312    | 174254    | 75526     | 658710    | 213717    | 254578    | 176793    |
| EIC     | Negative | 267.2331 | 6.57 | unknown | 183244    | 198488    | 253385   | 306070   | 267127    | 212139   | 338892    | 454824   | 264495   | 334483   | 334562    | 427650    | 321574    | 381852    | 400574    | 418334    | 455656    | 290624    | 0         |
| EIC     | Negative | 459.8077 | 1.63 | unknown | 34664     | 0         | 0        | 79891    | 227614    | 113824   | 0         | 100421   | 44104    | 117190   | 173753    | 91000     | 271807    | 55206     | 146043    | 88619     | 0         | 0         | 0         |
| fpHILIC | Positive | 281.0949 | 3.31 | unknown | 220817    | 786723    | 331818   | 252880   | 6931970   | 598052   | 655399    | 559797   | 224796   | 491125   | 725475    | 537948    | 836811    | 595374    | 744008    | 587606    | 425576    | 807772    | 0         |
| EIC     | Negative | 333.1558 | 2.04 | unknown | 0         | 194726    | 0        | 194209   | 117886    | 230119   | 187448    | 150182   | 394356   | 200376   | 501800    | 315691    | 177762    | 496013    | 252826    | 400831    | 250020    | 0         | 353481    |
| EIC     | Negative | 505.3170 | 2.27 | unknown | 108862    | 98335     | 102794   | 92423    | 108862    | 98335    | 102794    | 92423    | 108862   | 110059   | 117537    | 136452    | 39399     | 152068    | 147609    | 142574    | 108379    | 257389    | 91446     |
| EIC     | Negative | 310.2833 | 6.64 | unknown | 3063909   | 5291063   | 5813677  | 8145237  | 7678589   | 5762476  | 7023043   | 6883004  | 7873572  | 5837475  | 6017662   | 11627464  | 8186138   | 6411381   | 6119472   | 11300504  | 8238980   | 9405354   | 9568002   |
| EIC     | Negative | 312.2264 | 3.30 | unknown | 377736    | 306759    | 422468   | 459992   | 473618    | 363211   | 560895    | 372940   | 746810   | 297465   | 253568    | 377849    | 347171    | 335651    | 249985    | 1302587   | 442493    | 492293    | 494189    |
| EIC     | Negative | 582.2821 | 4.64 | unknown | 1562323   | 1240036   | 1287822  | 1338525  | 1310384   | 1087009  | 1268007   | 1293899  | 1733767  | 1615752  | 1425223   | 1398375   | 1687458   | 1228006   | 1639449   | 1657482   | 1610474   | 1532615   | 1362398   |
| EIC     | Negative | 367.3493 | 6.79 |         |           |           |          |          |           |          |           |          |          |          |           |           |           |           |           |           |           |           |           |

|         |          |          |      |         |          |           |          |          |          |          |          |          |          |          |          |          |          |         |          |          |          |          |          |
|---------|----------|----------|------|---------|----------|-----------|----------|----------|----------|----------|----------|----------|----------|----------|----------|----------|----------|---------|----------|----------|----------|----------|----------|
| fpHILIC | Negative | 738.5213 | 0.35 | unknown | 243210   | 452466    | 375896   | 608779   | 700483   | 306376   | 427517   | 349013   | 881468   | 483530   | 648656   | 590081   | 578582   | 2092521 | 435763   | 736816   | 801508   | 518397   | 671900   |
| fpHILIC | Negative | 326.0751 | 2.24 | unknown | 689375   | 564215    | 360385   | 563766   | 1059957  | 831517   | 987630   | 723733   | 1259995  | 424240   | 582654   | 895817   | 940096   | 1020694 | 1189372  | 1448436  | 1021901  | 947668   | 1133833  |
| EIC     | Negative | 242.0515 | 0.53 | unknown | 273416   | 133066    | 202660   | 269726   | 355339   | 324334   | 208274   | 171363   | 250216   | 522664   | 172410   | 143779   | 175342   | 86478   | 337676   | 206274   | 369982   | 232163   | 410161   |
| EIC     | Negative | 293.1765 | 3.74 | unknown | 266700   | 194535    | 112939   | 109361   | 205447   | 187083   | 183750   | 324348   | 183219   | 165004   | 139912   | 221638   | 295982   | 195445  | 205595   | 169423   | 209200   | 246118   | 457746   |
| EIC     | Negative | 580.2931 | 1.98 | unknown | 242611   | 354358    | 0        | 239021   | 423520   | 559472   | 520113   | 1148892  | 0        | 795117   | 679092   | 1032188  | 1424516  | 1215050 | 766043   | 882610   | 0        | 620619   |          |
| EIC     | Negative | 444.2244 | 1.99 | unknown | 0        | 195750    | 0        | 0        | 158497   | 144060   | 162714   | 0        | 152357   | 0        | 214121   | 166342   | 178902   | 156516  | 184299   | 142645   | 193068   | 0        | 214437   |
| EIC     | Negative | 421.2517 | 2.72 | unknown | 177017   | 284321    | 179537   | 351735   | 361463   | 321471   | 247233   | 308676   | 342369   | 258069   | 334765   | 329838   | 348006   | 355809  | 395189   | 397643   | 359118   | 375340   | 356564   |
| fpHILIC | Positive | 446.1584 | 3.31 | unknown | 470318   | 986180    | 484387   | 376599   | 692570   | 815517   | 752940   | 517376   | 634815   | 421309   | 723717   | 834552   | 667491   | 837784  | 686047   | 1062468  | 727549   | 624253   | 963825   |
| EIC     | Negative | 288.1490 | 1.13 | unknown | 142449   | 98145     | 110739   | 94430    | 107553   | 110513   | 121090   | 130603   | 125885   | 161909   | 140363   | 115331   | 148353   | 156106  | 143831   | 114904   | 135123   | 172138   | 191455   |
| EIC     | Negative | 577.3509 | 3.65 | unknown | 13622942 | 15175267  | 8686909  | 9261835  | 12917508 | 11483964 | 10937667 | 13611069 | 10323362 | 10647762 | 12082689 | 11654826 | 12441993 | 9976374 | 14229483 | 12754132 | 12930092 | 15260990 | 15482294 |
| EIC     | Negative | 287.1175 | 0.99 | unknown | 87842    | 65712     | 75831    | 66633    | 70602    | 64094    | 72372    | 85253    | 71747    | 92816    | 80352    | 70434    | 84754    | 93544   | 82187    | 68717    | 83516    | 84855    | 115323   |
| EIC     | Negative | 323.1842 | 5.94 | unknown | 0        | 0         | 0        | 0        | 0        | 0        | 0        | 230745   | 0        | 0        | 396157   | 0        | 432133   | 0       | 0        | 275493   | 0        | 0        | 0        |
| EIC     | Negative | 397.1797 | 1.63 | unknown | 0        | 0         | 0        | 0        | 28753    | 85902    | 12673    | 0        | 31240    | 0        | 32325    | 0        | 37556    | 53969   | 24885    | 67802    | 13828    | 43404    | 99539    |
| EIC     | Negative | 301.1660 | 5.18 | unknown | 442884   | 559422    | 435725   | 461828   | 541251   | 501817   | 556842   | 406403   | 502131   | 448830   | 553457   | 547247   | 516878   | 620344  | 620400   | 661023   | 528291   | 534993   | 655552   |
| EIC     | Negative | 307.1926 | 3.02 | unknown | 72840    | 55117     | 0        | 52084    | 67205    | 67143    | 90615    | 68180    | 95972    | 63490    | 46358    | 63420    | 103721   | 94342   | 44232    | 202074   | 73300    | 80793    | 66340    |
| EIC     | Negative | 642.3149 | 4.79 | unknown | 105901   | 178970    | 230785   | 212079   | 252138   | 290178   | 321123   | 260835   | 254220   | 242685   | 350433   | 307021   | 373201   | 264261  | 306124   | 392738   | 395113   | 231493   | 332024   |
| EIC     | Negative | 345.1572 | 2.89 | unknown | 201050   | 866631    | 66627    | 442993   | 620466   | 879481   | 727029   | 211040   | 914840   | 352997   | 873740   | 1272365  | 1279106  | 633981  | 1230366  | 1978183  | 748799   | 254045   | 414001   |
| fpHILIC | Positive | 132.0803 | 2.61 | unknown | 1122011  | 1453912   | 1190387  | 823679   | 1087233  | 1424931  | 1596090  | 757495   | 916788   | 1040080  | 1574553  | 1293471  | 1180382  | 1721904 | 1800316  | 1257516  | 1243686  | 1254470  | 1428487  |
| EIC     | Negative | 594.5562 | 6.63 | unknown | 568075   | 1452767   | 1640367  | 2577898  | 2454357  | 1583452  | 1946751  | 2026789  | 2247885  | 1621617  | 1691509  | 3163220  | 2043456  | 1824609 | 1802360  | 2822197  | 3703644  | 2559543  | 1646400  |
| EIC     | Negative | 630.3207 | 0.86 | unknown | 240470   | 534209    | 383792   | 307209   | 481959   | 778399   | 266925   | 210074   | 466925   | 412717   | 437647   | 303983   | 423329   | 771887  | 626401   | 266925   | 510278   | 315262   | 461818   |
| EIC     | Negative | 344.1539 | 2.89 | unknown | 478461   | 4399266   | 715230   | 1243139  | 3252548  | 4747619  | 3986064  | 1270060  | 7337554  | 1944404  | 4671449  | 6041119  | 6871068  | 3538842 | 6620265  | 10649119 | 4130122  | 1252668  | 2263546  |
| EIC     | Negative | 642.3422 | 2.89 | unknown | 548495   | 723583    | 137336   | 269339   | 475083   | 824780   | 506734   | 244051   | 295629   | 429637   | 519754   | 549415   | 695532   | 623588  | 623588   | 723451   | 695422   | 300260   | 1465165  |
| EIC     | Negative | 631.3212 | 0.86 | unknown | 148091   | 311571    | 211072   | 170147   | 279596   | 441406   | 152039   | 132664   | 147285   | 215883   | 251021   | 182888   | 254873   | 449670  | 370480   | 262725   | 299534   | 183273   | 271529   |
| EIC     | Negative | 255.1604 | 3.91 | unknown | 499063   | 508596    | 377364   | 320859   | 486035   | 405879   | 388974   | 460162   | 319499   | 598554   | 410492   | 394630   | 448582   | 340195  | 488150   | 443641   | 462498   | 554745   | 540268   |
| EIC     | Negative | 417.1195 | 1.61 | unknown | 523727   | 456680    | 830770   | 280497   | 295736   | 415428   | 815156   | 550912   | 550798   | 354466   | 549678   | 846269   | 673136   | 620022  | 504311   | 820736   | 762097   | 550136   | 537885   |
| fpHILIC | Negative | 230.0740 | 2.95 | unknown | 240409   | 330617    | 268134   | 192311   | 318600   | 432557   | 376027   | 221980   | 303329   | 301346   | 663401   | 401283   | 256355   | 302787  | 324031   | 515707   | 409399   | 281528   | 466145   |
| EIC     | Negative | 313.1197 | 1.99 | unknown | 990483   | 1779875   | 739040   | 803557   | 1667361  | 1028580  | 1826420  | 729418   | 1306324  | 0        | 2180419  | 2147002  | 2275086  | 1005819 | 1201295  | 3200474  | 1943796  | 267690   | 1307844  |
| fpHILIC | Negative | 119.9763 | 0.81 | unknown | 460499   | 449318    | 451509   | 514823   | 539080   | 507679   | 540816   | 580451   | 541268   | 483951   | 492887   | 552868   | 547711   | 504628  | 583610   | 0        | 727902   | 1453905  | 512841   |
| EIC     | Negative | 339.2366 | 4.38 | unknown | 359457   | 347686    | 251365   | 206312   | 332972   | 256041   | 332966   | 318912   | 228360   | 277242   | 35057    | 256309   | 360563   | 269635  | 336931   | 310776   | 351818   | 391187   | 389616   |
| EIC     | Negative | 610.3377 | 1.92 | unknown | 0        | 289176    | 0        | 0        | 240372   | 267945   | 303354   | 0        | 253036   | 0        | 326665   | 359191   | 361038   | 306761  | 258798   | 307147   | 288042   | 0        | 439223   |
| EIC     | Negative | 375.1795 | 2.78 | unknown | 1956628  | 3920463   | 1256421  | 1194764  | 3692983  | 3465669  | 4192217  | 2117043  | 3612621  | 3856169  | 4491795  | 4391741  | 4158092  | 3852708 | 4601066  | 3615821  | 4459609  | 3465350  | 4591715  |
| EIC     | Negative | 455.2564 | 1.81 | unknown | 50653    | 396933    | 255903   | 337763   | 0        | 366044   | 0        | 366044   | 223930   | 253468   | 399285   | 405213   | 435816   | 404998  | 406632   | 428192   | 453629   | 0        | 427076   |
| fpHILIC | Negative | 125.9949 | 1.94 | unknown | 430069   | 449076    | 400664   | 623648   | 452120   | 568447   | 431092   | 378022   | 597565   | 656005   | 743988   | 660615   | 645274   | 556558  | 701628   | 669828   | 608961   | 446341   | 526267   |
| EIC     | Negative | 373.2372 | 5.83 | unknown | 511446   | 547388    | 389633   | 371072   | 520541   | 467204   | 399564   | 521962   | 357311   | 355420   | 468478   | 403071   | 456896   | 370119  | 524498   | 522050   | 550136   | 598675   | 560393   |
| fpHILIC | Positive | 738.5325 | 0.34 | unknown | 57898    | 113747    | 89076    | 119800   | 113747   | 89076    | 119800   | 99622    | 183323   | 156269   | 178237   | 188664   | 589443   | 94189   | 159343   | 223662   | 173536   | 192627   | 0        |
| EIC     | Negative | 397.1795 | 0.86 | unknown | 85389    | 188081    | 96587    | 81750    | 303461   | 117840   | 323467   | 163675   | 398042   | 138292   | 247401   | 37981    | 149113   | 406617  | 182988   | 422453   | 204916   | 235519   | 343276   |
| EIC     | Negative | 276.1970 | 2.86 | unknown | 282841   | 352907    | 175598   | 259948   | 294634   | 305616   | 264174   | 358216   | 287951   | 285724   | 356121   | 264771   | 358976   | 301686  | 402248   | 282323   | 393015   | 368615   | 567674   |
| EIC     | Negative | 592.2995 | 4.85 | unknown | 441521   | 454430    | 599234   | 698053   | 646362   | 656510   | 766271   | 748232   | 765297   | 805343   | 726369   | 778709   | 895005   | 826214  | 894281   | 878613   | 853013   | 910683   | 825996   |
| EIC     | Negative | 587.3596 | 2.78 | unknown | 9629680  | 9502912   | 4951276  | 5221207  | 10459740 | 8104980  | 14542450 | 8563795  | 5212356  | 6850518  | 14206900 | 10666965 | 13175524 | 9895793 | 10432741 | 9388798  | 13579329 | 9530429  | 15414803 |
| EIC     | Negative | 321.0442 | 2.18 | unknown | 920046   | 1223314   | 1340488  | 288224   | 710868   | 732728   | 1399184  | 445417   | 1295309  | 437163   | 945897   | 1747396  | 1263553  | 1178276 | 1159711  | 1697249  | 1230911  | 419232   | 1076193  |
| fpHILIC | Positive | 221.0912 | 2.42 | unknown | 1093790  | 548066    | 231837   | 249098   | 833021   | 668982   | 807454   | 342484   | 603634   | 219603   | 470210   | 689368   | 580737   | 936566  | 1219364  | 609090   | 690418   | 539548   | 931185   |
| EIC     | Negative | 588.3629 | 2.78 | unknown | 3852533  | 3693490   | 1863569  | 1973403  | 3867076  | 3058232  | 5457418  | 3293233  | 3490235  | 2543716  | 5398814  | 3867783  | 4873035  | 3734346 | 5322822  | 3508797  | 5061850  | 3588978  | 8801504  |
| EIC     | Negative | 340.3303 | 6.80 | unknown | 516343   | 628944    | 649068   | 619411   | 670526   | 762728   | 620845   | 762728   | 734735   | 734735   | 734735   | 734735   | 828667   | 839928  | 525503   | 832542   | 625084   | 1085597  | 834986   |
| fpHILIC | Negative | 171.0413 | 2.73 | unknown | 261841   | 463871    | 267684   | 174704   | 361361   | 637703   | 316141   | 205119   | 221635   | 323215   | 551993   | 307910   | 330295   | 909277  | 617942   | 362339   | 281555   | 289053   | 574687   |
| EIC     | Negative | 592.3278 | 2.83 | unknown | 311303   | 582789    | 223471   | 227034   | 476663   | 511725   | 554062   | 358656   | 473843   | 411336   | 599206   | 719939   | 385933   | 707371  | 757975   | 678348   | 559677   | 278080   | 889202   |
| EIC     | Negative | 339.3269 | 6.80 | unknown | 2109256  | 2616782   | 2630257  | 2554710  | 2733306  | 3109760  | 2525741  | 3181319  | 2266334  | 3013215  | 3104039  | 3906675  | 2575094  | 3409960 | 3375467  | 2222616  | 3399566  | 4493645  | 3424995  |
| EIC     | Negative | 401.2250 | 3.84 | unknown | 356999   | 1041212   | 318712   | 717902   | 835574   | 981180   | 739226   | 593881   | 951454   | 770463   | 1005048  | 904947   | 928983   | 932645  | 934657   | 966798   | 1065334  | 1058148  | 998291   |
| EIC     | Negative | 614.1851 | 3.83 | unknown | 73889    | 169715    | 132190   | 193315   | 172074   | 188553   | 249313   | 161671   | 226825   | 173120   | 305410   | 323542   | 243273   | 278574  | 272062   | 271812   | 227475   | 186990   | 258237   |
| EIC     | Negative | 278.2838 | 3.65 | unknown | 97906233 | 105484845 | 78874286 | 68893516 | 96290802 | 86280139 | 83697934 | 98361753 | 71414625 | 76518609 | 92432581 | 84570417 |          |         |          |          |          |          |          |

|         |          |          |      |         |          |           |          |           |           |           |           |          |           |          |           |           |           |           |           |           |           |          |           |
|---------|----------|----------|------|---------|----------|-----------|----------|-----------|-----------|-----------|-----------|----------|-----------|----------|-----------|-----------|-----------|-----------|-----------|-----------|-----------|----------|-----------|
| EIC     | Negative | 424.2713 | 4.25 | unknown | 757114   | 699286    | 584707   | 506969    | 668336    | 591325    | 663295    | 798334   | 569642    | 612450   | 731065    | 643909    | 764988    | 660287    | 812636    | 669337    | 885774    | 900311   | 858334    |
| fpHILIC | Negative | 103.0041 | 1.68 | unknown | 11561584 | 46563808  | 32439944 | 43695860  | 26382714  | 53564352  | 31397194  | 25560862 | 45362272  | 40336460 | 47401992  | 39575096  | 38806200  | 44402772  | 72425280  | 51761516  | 26778844  | 41478344 | 36145556  |
| EIC     | Negative | 279.0642 | 2.50 | unknown | 442312   | 337575    | 149318   | 224003    | 324498    | 315146    | 307271    | 380948   | 307221    | 579079   | 332451    | 307941    | 331347    | 362431    | 360952    | 344477    | 335497    | 670798   | 342427    |
| EIC     | Negative | 424.2713 | 4.18 | unknown | 802097   | 933428    | 651504   | 594954    | 792773    | 732095    | 790815    | 1017853  | 708838    | 742897   | 920504    | 768517    | 998327    | 766934    | 965136    | 784877    | 1063298   | 1183911  | 1081659   |
| EIC     | Negative | 643.3456 | 2.89 | unknown | 175779   | 329495    | 0        | 155046    | 208895    | 285319    | 181652    | 82758    | 376552    | 122852   | 64443     | 170533    | 173948    | 211544    | 250564    | 264947    | 253286    | 157906   | 540061    |
| EIC     | Negative | 552.2827 | 2.60 | unknown | 417736   | 457392    | 269958   | 0         | 240507    | 345972    | 405211    | 345346   | 398206    | 378852   | 495788    | 391513    | 498868    | 404763    | 552736    | 359390    | 547235    | 443633   | 485774    |
| EIC     | Negative | 272.0965 | 1.61 | unknown | 137227   | 252151    | 0        | 114760    | 114570    | 221857    | 273281    | 211052   | 0         | 33524    | 231525    | 323714    | 224420    | 160140    | 360046    | 329403    | 202377    | 0        | 182473    |
| fpHILIC | Positive | 249.1071 | 3.69 | unknown | 465543   | 742105    | 299737   | 387710    | 498942    | 961698    | 551933    | 348580   | 414219    | 350298   | 1003898   | 986745    | 807815    | 761320    | 707688    | 912040    | 672979    | 441424   | 724217    |
| EIC     | Negative | 516.2732 | 2.89 | unknown | 319030   | 276048    | 0        | 0         | 231131    | 401072    | 211157    | 0        | 281750    | 0        | 173673    | 257081    | 197559    | 195276    | 324728    | 269926    | 369784    | 0        | 473444    |
| EIC     | Negative | 288.1318 | 1.92 | unknown | 0        | 113112    | 0        | 0         | 54509     | 125138    | 109614    | 0        | 93999     | 0        | 94823     | 166328    | 148216    | 109738    | 120395    | 143150    | 107274    | 0        | 112770    |
| EIC     | Negative | 345.2073 | 2.18 | unknown | 281858   | 537555    | 257408   | 360638    | 985991    | 1163838   | 1304694   | 1979165  | 1739760   | 397340   | 737362    | 89858     | 793360    | 2578581   | 1168581   | 2772243   | 425597    | 2414282  | 2280914   |
| EIC     | Negative | 592.2995 | 5.05 | unknown | 402012   | 414184    | 571180   | 654297    | 506119    | 559682    | 618073    | 730313   | 732479    | 738337   | 651128    | 784055    | 752253    | 802480    | 724006    | 784883    | 804107    | 917631   | 747289    |
| EIC     | Negative | 477.7391 | 0.84 | unknown | 218807   | 507414    | 177671   | 229767    | 304573    | 772648    | 173833    | 185030   | 151576    | 166546   | 278862    | 238689    | 260219    | 275506    | 632564    | 592868    | 316941    | 265336   | 201680    |
| EIC     | Negative | 314.1796 | 1.88 | unknown | 431847   | 371407    | 0        | 0         | 426462    | 540186    | 426912    | 0        | 316160    | 0        | 468377    | 440313    | 544303    | 192884    | 659835    | 608606    | 579809    | 0        | 314881    |
| EIC     | Negative | 279.1865 | 3.65 | unknown | 11712725 | 12456188  | 9458281  | 8352586   | 11535332  | 10210918  | 9709312   | 0        | 11879803  | 8579323  | 9441220   | 10902669  | 10119145  | 11023189  | 8997899   | 12570797  | 11575483  | 13264737 | 14190221  |
| EIC     | Negative | 628.3532 | 4.78 | unknown | 0        | 11944372  | 0        | 0         | 0         | 0         | 0         | 0        | 12406813  | 6520055  | 0         | 0         | 7807093   | 0         | 7152326   | 0         | 0         | 0        | 8567123   |
| fpHILIC | Negative | 124.9914 | 1.93 | unknown | 18408396 | 19497436  | 18159146 | 29049690  | 19651032  | 25553762  | 20668342  | 17615270 | 25793236  | 30763636 | 32927038  | 29634750  | 29221876  | 25775922  | 34812348  | 30719384  | 26374882  | 21625344 | 24966936  |
| EIC     | Negative | 457.1821 | 2.78 | unknown | 103863   | 464940    | 0        | 0         | 447403    | 401916    | 452842    | 183956   | 491211    | 379519   | 542413    | 454953    | 514022    | 466150    | 577448    | 442614    | 516461    | 395551   | 539201    |
| EIC     | Negative | 338.2342 | 4.07 | unknown | 1673921  | 1773899   | 1303038  | 1009037   | 1659277   | 1458113   | 1495890   | 1758110  | 1244520   | 1355120  | 1725002   | 1449662   | 1743397   | 1530786   | 2025148   | 1515465   | 1882219   | 1935451  | 2297070   |
| fpHILIC | Positive | 169.0686 | 0.96 | unknown | 221161   | 235454    | 175237   | 208728    | 353819    | 362694    | 320949    | 191685   | 209319    | 196353   | 379319    | 243865    | 314133    | 413132    | 403132    | 302756    | 275554    | 259448   | 688271    |
| EIC     | Negative | 309.1710 | 2.94 | unknown | 547497   | 789884    | 534542   | 445385    | 827874    | 765558    | 728930    | 614624   | 568201    | 511262   | 191713    | 831167    | 908783    | 809693    | 952126    | 812726    | 1026281   | 632480   | 1021681   |
| EIC     | Negative | 322.0472 | 2.18 | unknown | 135945   | 213264    | 209088   | 43233     | 127022    | 126531    | 247537    | 63043    | 230757    | 61152    | 169265    | 33120     | 227475    | 199384    | 200614    | 281428    | 225363    | 90806    | 211283    |
| fpHILIC | Negative | 121.0296 | 0.90 | unknown | 2091073  | 1229347   | 1644048  | 1428918   | 1920246   | 2173081   | 1098374   | 1979703  | 1909938   | 1807238  | 984873    | 1812408   | 1941381   | 1615267   | 1646611   | 3298500   | 2276541   | 2288055  | 1807964   |
| fpHILIC | Negative | 126.9873 | 1.93 | unknown | 825333   | 856524    | 776099   | 1294434   | 877932    | 1181807   | 1004673   | 780336   | 1121020   | 1373258  | 1599666   | 1391414   | 1385821   | 1202256   | 1647942   | 1434099   | 1179172   | 984132   | 1394532   |
| EIC     | Negative | 398.2266 | 4.23 | unknown | 204428   | 207998    | 140952   | 155235    | 191888    | 154188    | 167038    | 205890   | 187921    | 161108   | 209591    | 184116    | 230696    | 162537    | 205452    | 137278    | 270776    | 257771   | 223218    |
| EIC     | Negative | 608.4777 | 6.44 | unknown | 13574221 | 21815452  | 306710   | 16271358  | 14262255  | 10756504  | 15440462  | 12551470 | 19914846  | 7136556  | 20923252  | 12597022  | 15599622  | 15665798  | 15104970  | 23392012  | 22960728  | 10310511 | 21139480  |
| EIC     | Negative | 437.2459 | 2.48 | unknown | 371798   | 380825    | 150414   | 128997    | 411297    | 372866    | 313749    | 539267   | 414870    | 793620   | 421435    | 415018    | 411951    | 450426    | 425403    | 419388    | 418400    | 918556   | 433010    |
| EIC     | Negative | 364.1840 | 1.92 | unknown | 0        | 117282    | 0        | 0         | 65277     | 153157    | 157596    | 0        | 109276    | 0        | 162573    | 268615    | 262840    | 180052    | 175199    | 147378    | 173431    | 0        | 122875    |
| EIC     | Negative | 478.2413 | 0.84 | unknown | 172084   | 288254    | 98767    | 139568    | 174002    | 397882    | 96424     | 121255   | 114043    | 128812   | 192974    | 135948    | 147772    | 141988    | 334604    | 308890    | 186082    | 214164   | 110036    |
| EIC     | Negative | 556.3526 | 3.65 | unknown | 762086   | 0         | 527688   | 0         | 942385    | 799711    | 0         | 527318   | 576096    | 742084   | 0         | 0         | 552533    | 0         | 941188    | 951055    | 1006033   | 0        | 0         |
| EIC     | Negative | 435.3486 | 6.56 | unknown | 711229   | 347450    | 416374   | 651503    | 504785    | 534155    | 474295    | 588395   | 928428    | 722124   | 1086420   | 572474    | 741741    | 647643    | 796641    | 810903    | 558764    | 901571   | 821761    |
| fpHILIC | Negative | 121.0409 | 0.92 | unknown | 198759   | 271286    | 44030    | 168766    | 377610    | 438498    | 332655    | 114233   | 537626    | 143878   | 373377    | 467368    | 375627    | 300968    | 477858    | 611807    | 454437    | 292821   | 476604    |
| EIC     | Negative | 311.2231 | 2.49 | unknown | 168964   | 71618     | 139391   | 81119     | 83838     | 138052    | 157707    | 104209   | 144286    | 81951    | 72481     | 89623     | 88362     | 97654     | 73872     | 366481    | 150986    | 116731   | 106096    |
| EIC     | Negative | 420.2511 | 2.72 | unknown | 561122   | 1091462   | 714051   | 1264413   | 1184626   | 1093517   | 1034766   | 1096012  | 1136621   | 882334   | 1102545   | 1297830   | 3137373   | 1368989   | 1342726   | 1419996   | 1482254   | 1344895  | 1559084   |
| EIC     | Negative | 434.2664 | 2.73 | unknown | 825144   | 245246096 | 798153   | 266955520 | 264950832 | 252985152 | 250338016 | 1605137  | 241320672 | 778528   | 244475888 | 251994128 | 321506528 | 298873184 | 318576768 | 317784640 | 326280800 | 0        | 344295744 |
| EIC     | Negative | 463.3072 | 2.14 | unknown | 86565    | 17991     | 119430   | 90324     | 93867     | 27881     | 12375     | 494597   | 87180     | 227557   | 8960      | 31537     | 26766     | 62407     | 59554     | 41984     | 42758     | 732295   | 48980     |
| EIC     | Negative | 605.4810 | 6.84 | unknown | 209056   | 146587    | 145737   | 0         | 191402    | 158218    | 250287    | 284957   | 158218    | 250287   | 203221    | 279043    | 233389    | 223244    | 212597    | 228512    | 166100    | 208597   | 208597    |
| EIC     | Negative | 431.1394 | 3.80 | unknown | 172298   | 186651    | 154379   | 185077    | 196644    | 247544    | 171259    | 230124   | 162610    | 136266   | 145176    | 210072    | 236699    | 259854    | 209746    | 277683    | 277646    | 275016   | 263634    |
| fpHILIC | Negative | 401.1116 | 2.69 | unknown | 178295   | 597216    | 479194   | 256121    | 353076    | 419706    | 719025    | 472460   | 635628    | 348272   | 463595    | 503669    | 625470    | 443703    | 568020    | 396940    | 496820    | 0        | 0         |
| EIC     | Negative | 282.1717 | 2.50 | unknown | 346885   | 400874    | 201788   | 219956    | 334032    | 302487    | 334308    | 404714   | 292363    | 394127   | 394755    | 343274    | 356282    | 384901    | 378864    | 338301    | 436129    | 538304   | 467340    |
| EIC     | Negative | 402.2300 | 3.84 | unknown | 191106   | 334130    | 110303   | 178116    | 195162    | 264118    | 253430    | 176582   | 385058    | 391720   | 178156    | 333819    | 289329    | 319703    | 345112    | 370676    | 345027    | 321021   | 304444    |
| fpHILIC | Negative | 247.0933 | 3.69 | unknown | 325552   | 451586    | 223184   | 231640    | 358375    | 549171    | 307396    | 210969   | 221500    | 197022   | 513140    | 579214    | 471021    | 465284    | 434061    | 551520    | 407317    | 259232   | 449712    |
| fpHILIC | Negative | 346.1615 | 2.97 | unknown | 804488   | 783926    | 1046203  | 510368    | 1627695   | 1545341   | 1251341   | 1203010  | 373960    | 719238   | 1089116   | 1298676   | 1141777   | 991045    | 1132876   | 1481778   | 1330063   | 1529337  | 2217343   |
| EIC     | Negative | 229.1809 | 2.65 | unknown | 156757   | 185035    | 120581   | 143806    | 199244    | 160911    | 185849    | 157708   | 182275    | 152327   | 180465    | 186847    | 215945    | 148022    | 151784    | 399415    | 209638    | 210662   | 179785    |
| EIC     | Negative | 581.2969 | 1.98 | unknown | 0        | 119250    | 0        | 0         | 134728    | 167616    | 180259    | 0        | 381638    | 0        | 229416    | 207080    | 317485    | 448378    | 374229    | 246085    | 294368    | 0        | 208599    |
| EIC     | Negative | 298.1664 | 2.15 | unknown | 187379   | 190905    | 158202   | 109145    | 228597    | 316092    | 194329    | 163869   | 170576    | 145196   | 425906    | 275909    | 375750    | 411273    | 408063    | 329960    | 340148    | 107024   | 210203    |
| fpHILIC | Positive | 282.1183 | 3.18 | unknown | 1243799  | 1772028   | 1142150  | 1032556   | 1027641   | 1655261   | 1971803   | 813001   | 998982    | 1145233  | 1933389   | 1488544   | 2051314   | 1318084   | 1933264   | 1776593   | 1742432   | 1276038  | 1688025   |
| EIC     | Negative | 328.8034 | 0.65 | unknown | 56248    | 49518     | 76711    | 90102     | 83467     | 99248     | 100686    | 95067    | 145611    | 160724   | 121381    | 121463    | 141442    | 62715     | 111077    | 153325    | 118035    | 144368   | 155680    |
| EIC     | Negative | 370.1593 | 1.87 | unknown | 73602    | 25343     | 0        | 0         | 98816     | 77755     | 79508     | 0        | 0         | 0        | 86771     | 62165     | 62255     | 28821     | 80817     |           |           |          |           |

|         |          |          |      |         |           |           |           |           |           |           |           |           |           |           |           |           |           |           |           |           |           |           |           |
|---------|----------|----------|------|---------|-----------|-----------|-----------|-----------|-----------|-----------|-----------|-----------|-----------|-----------|-----------|-----------|-----------|-----------|-----------|-----------|-----------|-----------|-----------|
| fpHILIC | Positive | 126.1026 | 3.89 | unknown | 3181328   | 2232678   | 1097932   | 4052905   | 2122772   | 4190363   | 1193658   | 3492738   | 4174806   | 1923593   | 2136961   | 3749901   | 5651532   | 4938377   | 2271021   | 3838248   | 6843486   | 4742020   | 2689885   |
| EIC     | Negative | 635.3386 | 2.65 | unknown | 0         | 93831     | 0         | 0         | 69675     | 79203     | 122050    | 0         | 40852     | 0         | 78177     | 94354     | 75042     | 68700     | 88818     | 90303     | 101335    | 0         | 138515    |
| EIC     | Negative | 642.3421 | 3.39 | unknown | 708570    | 851698    | 435626    | 450524    | 480600    | 896707    | 538491    | 476106    | 938773    | 662392    | 771747    | 934108    | 727230    | 431991    | 681911    | 1162592   | 1031413   | 350225    | 1252446   |
| EIC     | Negative | 320.2261 | 4.40 | unknown | 0         | 0         | 113730    | 106697    | 163980    | 0         | 230333    | 0         | 25720     | 131419    | 291145    | 370087    | 29647     | 0         | 0         | 0         | 55284     | 513674    | 0         |
| fpHILIC | Negative | 240.0628 | 2.61 | unknown | 536346    | 871897    | 687345    | 338833    | 598052    | 661421    | 796078    | 535823    | 475235    | 622665    | 908551    | 767064    | 717638    | 957541    | 1291234   | 728201    | 760152    | 668749    | 680872    |
| EIC     | Negative | 284.2588 | 6.56 | unknown | 236128    | 236819    | 321772    | 351913    | 335126    | 265265    | 369463    | 330485    | 834668    | 278656    | 555864    | 437785    | 690979    | 465007    | 486711    | 356994    | 487185    | 615895    | 456767    |
| EIC     | Negative | 282.2520 | 6.56 | unknown | 24968769  | 26475446  | 32478072  | 35683096  | 35299490  | 27647978  | 0         | 0         | 8526442   | 4558746   | 6699389   | 0         | 0         | 0         | 0         | 0         | 0         | 0         | 0         |
| EIC     | Negative | 293.1762 | 6.03 | unknown | 0         | 0         | 0         | 0         | 0         | 0         | 0         | 8526442   | 4558746   | 6699389   | 0         | 0         | 0         | 0         | 0         | 0         | 0         | 0         | 0         |
| EIC     | Negative | 362.2373 | 4.96 | unknown | 0         | 0         | 0         | 0         | 0         | 0         | 0         | 102294    | 182929    | 0         | 0         | 121034    | 101070    | 97345     | 0         | 0         | 0         | 0         | 256627    |
| fpHILIC | Negative | 737.5231 | 0.35 | unknown | 445161    | 1184838   | 1073375   | 1307866   | 1660180   | 339177    | 1267487   | 874562    | 2310669   | 1225706   | 1741414   | 1641852   | 1600879   | 6281102   | 1267639   | 1978308   | 2227817   | 1636229   | 1623052   |
| fpHILIC | Negative | 163.0247 | 2.90 | unknown | 1057741   | 813850    | 527014    | 584635    | 769504    | 863703    | 979767    | 552282    | 1111216   | 453111    | 472528    | 835426    | 795098    | 1102606   | 1202140   | 1160951   | 1279501   | 893903    | 1276465   |
| EIC     | Negative | 534.7828 | 1.29 | unknown | 81633     | 268323    | 0         | 0         | 204076    | 307391    | 107682    | 0         | 98993     | 125720    | 190886    | 214254    | 213840    | 176036    | 362527    | 219157    | 282909    | 0         | 113504    |
| EIC     | Negative | 307.0648 | 1.95 | unknown | 3418020   | 14621570  | 3209874   | 522052    | 12134324  | 10537693  | 14707507  | 999324    | 5502674   | 2978548   | 14715839  | 16073362  | 16242425  | 14746399  | 22437186  | 12641999  | 12379693  | 675007    | 11635288  |
| EIC     | Negative | 565.5146 | 6.55 | unknown | 621759    | 550419    | 791775    | 1179338   | 1522087   | 592049    | 1267213   | 1175259   | 1038768   | 782096    | 2395920   | 1104882   | 3604448   | 986842    | 1467806   | 985165    | 1604053   | 2718631   | 853565    |
| EIC     | Negative | 363.1810 | 1.92 | unknown | 0         | 537659    | 0         | 0         | 216094    | 727626    | 652685    | 0         | 516011    | 0         | 702263    | 1143333   | 1159330   | 843470    | 791970    | 702443    | 778141    | 0         | 608777    |
| EIC     | Negative | 436.2718 | 2.72 | unknown | 5755334   | 9685663   | 5555507   | 10599610  | 10949602  | 10468911  | 10079299  | 7724508   | 9473294   | 7865903   | 9489212   | 10242341  | 12637502  | 12583882  | 12786648  | 13528707  | 13771651  | 12826952  | 13623886  |
| EIC     | Negative | 509.3497 | 3.04 | unknown | 97857     | 120351    | 97994     | 67600     | 194983    | 152872    | 218874    | 196802    | 202092    | 144280    | 199215    | 66416     | 127242    | 156558    | 271810    | 352301    | 243387    | 177949    | 274158    |
| fpHILIC | Negative | 119.0542 | 3.17 | unknown | 1462325   | 2199777   | 1472834   | 1230312   | 1484934   | 1950358   | 2036709   | 1593453   | 1708227   | 1742270   | 2541093   | 2719006   | 2522635   | 2964572   | 3183688   | 2703784   | 1887707   | 1836782   | 2768400   |
| EIC     | Negative | 624.3314 | 3.79 | unknown | 376601    | 1869984   | 359948    | 691533    | 1034020   | 1530503   | 1099516   | 453644    | 1128878   | 763665    | 2162221   | 1458499   | 1828809   | 1454156   | 1553186   | 1815400   | 1673993   | 539103    | 1605569   |
| EIC     | Negative | 308.0680 | 1.95 | unknown | 580892    | 2491218   | 381483    | 0         | 2134568   | 1800175   | 2514732   | 0         | 946846    | 0         | 2547298   | 2788167   | 2788537   | 2571784   | 3829535   | 2168989   | 2174048   | 0         | 1987158   |
| EIC     | Negative | 642.3422 | 2.68 | unknown | 1242532   | 1478269   | 777652    | 893328    | 908478    | 1676606   | 1075365   | 844919    | 1875247   | 1327881   | 1054699   | 1762483   | 1331591   | 717469    | 1331417   | 2312538   | 2033705   | 618550    | 2485573   |
| EIC     | Negative | 625.3343 | 3.79 | unknown | 135233    | 708962    | 135852    | 250613    | 360373    | 578287    | 389227    | 412255    | 269917    | 769635    | 544721    | 686890    | 502674    | 578938    | 649127    | 606789    | 222104    | 578288    | 0         |
| EIC     | Negative | 608.3592 | 5.27 | unknown | 360593    | 266709    | 129216    | 220090    | 280326    | 251065    | 348434    | 285841    | 434363    | 174132    | 193001    | 296121    | 401302    | 379849    | 428834    | 413795    | 498430    | 317450    | 557794    |
| EIC     | Negative | 305.1432 | 3.83 | unknown | 413567    | 267774    | 489523    | 729502    | 434480    | 343331    | 590636    | 35191     | 573293    | 533200    | 252228    | 611524    | 782166    | 328842    | 592076    | 754915    | 457071    | 624949    | 294040    |
| EIC     | Negative | 619.3462 | 2.71 | unknown | 932457    | 769139    | 517445    | 568461    | 459784    | 1099061   | 782405    | 681851    | 839907    | 1109306   | 811258    | 1324093   | 921618    | 478499    | 889294    | 1177325   | 1327380   | 588923    | 1360793   |
| fpHILIC | Negative | 530.3031 | 0.59 | unknown | 389437    | 723065    | 125106    | 162457    | 472245    | 417950    | 378763    | 408141    | 539921    | 0         | 516649    | 494836    | 582206    | 567915    | 295921    | 542177    | 343242    | 1462684   | 426898    |
| EIC     | Negative | 412.1849 | 2.18 | unknown | 45402     | 112099    | 44769     | 191095    | 55072     | 81117     | 99728     | 100135    | 140544    | 0         | 61567     | 152809    | 65382     | 11419     | 50059     | 130218    | 65692     | 233088    | 181300    |
| fpHILIC | Negative | 216.0308 | 0.94 | unknown | 89795     | 42244     | 0         | 39398     | 1564380   | 2596727   | 1587934   | 789690    | 867055    | 0         | 0         | 92710     | 57383     | 106558    | 3133112   | 1832484   | 1664996   | 1516971   | 1869455   |
| EIC     | Negative | 435.2692 | 2.72 | unknown | 35600416  | 59501464  | 33881568  | 64543632  | 66163013  | 62962490  | 61079633  | 46925835  | 56553599  | 48977085  | 56967452  | 63249607  | 75836000  | 75164021  | 78894481  | 82380667  | 85026665  | 77287807  | 83719727  |
| EIC     | Negative | 434.2662 | 2.72 | unknown | 133715964 | 224162548 | 127945177 | 244092324 | 250169495 | 238566553 | 230640004 | 177227416 | 214337834 | 183736556 | 216561506 | 236283591 | 286733634 | 286587986 | 29954211  | 311000377 | 323583378 | 293434789 | 314379058 |
| EIC     | Negative | 358.2161 | 2.72 | unknown | 198197    | 202312    | 89250     | 259785    | 266147    | 262688    | 297048    | 197832    | 245468    | 203753    | 231851    | 242613    | 370382    | 372191    | 320716    | 328655    | 425330    | 326541    | 365158    |
| EIC     | Negative | 642.3422 | 2.79 | unknown | 821719    | 2205509   | 634904    | 735636    | 1104360   | 1999628   | 1157952   | 677493    | 2132293   | 1449274   | 1677882   | 2124173   | 1446220   | 874306    | 1541780   | 2469255   | 2393449   | 710895    | 2710783   |
| EIC     | Negative | 376.2513 | 2.72 | unknown | 2190708   | 3684685   | 2001982   | 4134713   | 4092047   | 3895656   | 4008643   | 2877501   | 3626578   | 2950598   | 3598888   | 3837603   | 5007510   | 4679871   | 4894725   | 5111537   | 5452019   | 5050020   | 5199671   |
| fpHILIC | Negative | 200.0414 | 2.46 | unknown | 396955    | 679818    | 463872    | 255675    | 566603    | 589217    | 726332    | 372542    | 659535    | 480558    | 964909    | 1014001   | 697988    | 828602    | 1035204   | 691642    | 665693    | 620703    | 1038129   |
| EIC     | Negative | 375.2481 | 2.72 | unknown | 15659271  | 26260095  | 14552206  | 29167356  | 30101434  | 27243394  | 21332206  | 25529812  | 21564400  | 28605075  | 27822525  | 34761403  | 33843518  | 335768642 | 37419513  | 38771519  | 35266262  | 36955342  | 0         |
| fpHILIC | Negative | 488.1621 | 3.66 | unknown | 67524     | 203720    | 246555    | 40237     | 44946     | 66818     | 262023    | 83274     | 584093    | 0         | 0         | 88930     | 40058     | 305060    | 53947     | 51575     | 98088     | 135353    | 1131400   |
| EIC     | Negative | 618.3422 | 2.63 | unknown | 450806    | 519379    | 297149    | 321348    | 416844    | 808980    | 556146    | 522239    | 467315    | 557837    | 861780    | 563215    | 323210    | 675151    | 974246    | 960289    | 225079    | 967589    | 0         |
| fpHILIC | Negative | 136.0331 | 2.83 | unknown | 1006636   | 800263    | 555984    | 584412    | 726043    | 1075012   | 630414    | 654040    | 747272    | 719588    | 697014    | 753641    | 698858    | 1590074   | 1119702   | 1141869   | 1045826   | 869322    | 134447    |
| EIC     | Negative | 505.3170 | 2.62 | unknown | 0         | 151099    | 0         | 171736    | 119794    | 162244    | 113428    | 0         | 75319     | 164044    | 123791    | 157565    | 300512    | 162359    | 146074    | 143514    | 172152    | 0         | 978786    |
| EIC     | Negative | 643.3459 | 3.06 | unknown | 451825    | 577608    | 323231    | 360765    | 407070    | 574738    | 463929    | 275350    | 631347    | 440206    | 567175    | 669438    | 505557    | 299494    | 544831    | 798489    | 801951    | 256500    | 885240    |
| EIC     | Negative | 608.3191 | 3.87 | unknown | 619626    | 1808765   | 531143    | 621008    | 1243429   | 1459834   | 724891    | 1109239   | 2025057   | 2086790   | 2017134   | 2321198   | 2133870   | 1815439   | 1561695   | 1855665   | 0         | 0         | 0         |
| EIC     | Negative | 271.1096 | 1.46 | unknown | 0         | 64914     | 0         | 86241     | 93111     | 95658     | 0         | 107967    | 0         | 78385     | 85703     | 100841    | 88635     | 96648     | 238219    | 106720    | 0         | 95191     |           |
| EIC     | Negative | 539.2318 | 1.91 | unknown | 0         | 125432    | 0         | 0         | 116010    | 125236    | 126460    | 0         | 115758    | 0         | 127998    | 127598    | 94231     | 90011     | 164704    | 193491    | 179811    | 0         | 141044    |
| EIC     | Negative | 491.3382 | 2.67 | unknown | 117236    | 105377    | 51349     | 36981     | 96681     | 120009    | 109976    | 83173     | 60497     | 250708    | 155718    | 155462    | 102982    | 504365    | 177234    | 112088    | 133221    | 117950    | 120241    |
| EIC     | Negative | 384.1854 | 1.87 | unknown | 76290     | 207117    | 0         | 0         | 49023     | 115884    | 177767    | 0         | 217955    | 0         | 233360    | 84661     | 242471    | 228852    | 196383    | 237649    | 153715    | 0         | 200214    |
| EIC     | Negative | 390.0709 | 1.95 | unknown | 0         | 120682    | 0         | 0         | 107475    | 81078     | 120991    | 0         | 40160     | 0         | 120465    | 131547    | 138752    | 124038    | 195150    | 99589     | 92054     | 0         | 104831    |
| EIC     | Negative | 374.2452 | 2.72 | unknown | 64973897  | 110174015 | 60818535  | 120982160 | 122963251 | 116903392 | 115204410 | 87490531  | 105882244 | 91101432  | 106582625 | 117042910 | 144144242 | 143566576 | 150858238 | 156370851 | 162354174 | 145076560 | 156981388 |
| EIC     | Negative | 481.3329 | 6.52 | unknown | 369862    | 661846    | 420028    | 714573    | 1370275   | 877741    | 1841059   | 804119    | 1166854   | 446321    | 1152141   | 767031    | 846162    | 1262741   | 1813031   | 1385230   | 1388542   | 497382    | 3448718   |
| EIC     | Negative | 614.5445 | 6.54 | unknown | 3533906   | 2133393   | 1466118   | 4248585   | 2628706   | 2462858   | 3149728   | 6083157   | 4291940   | 4480181   | 4321853   | 4061381   | 682665    | 6834624   | 4369404   | 5013032   | 609662    | 4332521   | 5899565   |
| fpHILIC |          |          |      |         |           |           |           |           |           |           |           |           |           |           |           |           |           |           |           |           |           |           |           |

|         |          |          |      |         |         |          |         |         |         |         |         |         |          |         |          |         |          |          |          |          |         |         |          |
|---------|----------|----------|------|---------|---------|----------|---------|---------|---------|---------|---------|---------|----------|---------|----------|---------|----------|----------|----------|----------|---------|---------|----------|
| EIC     | Negative | 251.1268 | 2.54 | unknown | 0       | 0        | 0       | 74675   | 632486  | 0       | 0       | 40522   | 0        | 481837  | 442611   | 0       | 0        | 0        | 495953   | 46623    | 0       | 435735  |          |
| EIC     | Negative | 466.2442 | 2.44 | unknown | 0       | 355505   | 0       | 0       | 313590  | 267327  | 288396  | 302328  | 303755   | 422018  | 427034   | 324909  | 430028   | 328181   | 429940   | 320893   | 419067  | 555493  | 426644   |
| EIC     | Negative | 381.2291 | 0.86 | unknown | 47018   | 59486    | 75295   | 72595   | 170924  | 196760  | 146496  | 265630  | 71038    | 75010   | 110209   | 95763   | 45130    | 79198    | 289499   | 194951   | 187132  | 380015  | 189513   |
| EIC     | Negative | 500.2791 | 3.42 | unknown | 328369  | 1001409  | 2059447 | 0       | 1206879 | 0       | 0       | 2779900 | 0        | 0       | 0        | 1940231 | 2738091  | 30837    | 1297972  | 1814305  | 2716995 | 0       | 0        |
| EIC     | Negative | 292.1566 | 2.36 | unknown | 42802   | 101194   | 0       | 135253  | 71906   | 122093  | 73461   | 71492   | 53259    | 147863  | 114812   | 122994  | 147838   | 78777    | 126856   | 129941   | 129417  | 103757  | 83745    |
| EIC     | Negative | 618.3442 | 2.48 | unknown | 300397  | 339405   | 102638  | 154585  | 246633  | 575865  | 294449  | 341987  | 339939   | 466747  | 348548   | 601332  | 361524   | 243750   | 437902   | 623077   | 628145  | 293318  | 650203   |
| EIC     | Negative | 322.9961 | 1.19 | unknown | 0       | 64653    | 81189   | 105072  | 6710    | 0       | 154275  | 194275  | 143689   | 166091  | 0        | 181302  | 169149   | 184113   | 16841    | 184556   | 180164  | 186761  | 138882   |
| EIC     | Negative | 285.0723 | 0.98 | unknown | 21982   | 0        | 10133   | 38987   | 35446   | 28538   | 54872   | 64391   | 53257    | 41056   | 16364    | 53853   | 54952    | 38214    | 77063    | 64704    | 100711  | 51803   | 53101    |
| EIC     | Negative | 376.1604 | 3.65 | unknown | 106081  | 97908    | 310180  | 143632  | 233250  | 236793  | 176431  | 271161  | 267099   | 149996  | 297252   | 239871  | 336444   | 252483   | 373771   | 332212   | 351328  | 305685  | 377328   |
| EIC     | Negative | 431.3176 | 3.86 | unknown | 141416  | 218465   | 143287  | 123749  | 313885  | 360527  | 337963  | 424632  | 278572   | 310568  | 394501   | 297259  | 215653   | 213683   | 565335   | 652292   | 293926  | 692233  | 317148   |
| EIC     | Negative | 237.1085 | 2.07 | unknown | 0       | 0        | 0       | 0       | 0       | 0       | 0       | 0       | 309850   | 0       | 0        | 0       | 0        | 0        | 455754   | 0        | 0       | 0       | 0        |
| EIC     | Negative | 487.2319 | 1.87 | unknown | 172398  | 722088   | 0       | 0       | 215197  | 331103  | 556769  | 0       | 803052   | 0       | 836465   | 297277  | 850160   | 887617   | 723394   | 832041   | 568517  | 0       | 687368   |
| EIC     | Negative | 434.2662 | 2.88 | unknown | 1779740 | 3545382  | 2113371 | 3686670 | 4516726 | 3982953 | 3311969 | 3094940 | 2939446  | 2041317 | 2811776  | 2933678 | 4431483  | 4663929  | 4786771  | 5570035  | 5935589 | 4640186 | 5414900  |
| EIC     | Negative | 375.2167 | 4.74 | unknown | 42847   | 38840    | 45831   | 53597   | 61778   | 37478   | 61121   | 77472   | 52935    | 55656   | 0        | 38115   | 0        | 28738    | 27432    | 275821   | 40851   | 47109   | 39397    |
| EIC     | Negative | 327.1636 | 4.22 | unknown | 0       | 0        | 0       | 0       | 252561  | 261856  | 79961   | 0       | 206527   | 258981  | 0        | 0       | 0        | 0        | 133143   | 351345   | 407417  | 298318  | 0        |
| EIC     | Negative | 374.2452 | 2.88 | unknown | 846529  | 1645777  | 1014240 | 1722905 | 1238880 | 1881370 | 1557963 | 1455449 | 1359888  | 974848  | 1341879  | 1387424 | 2126060  | 2199655  | 2322409  | 2707549  | 2790590 | 2081929 | 2566484  |
| fpHILIC | Positive | 155.0789 | 4.84 | unknown | 320950  | 337349   | 272935  | 203617  | 258495  | 260367  | 359467  | 211003  | 342201   | 380318  | 281059   | 295921  | 354328   | 360841   | 574273   | 336623   | 531249  | 314301  | 379543   |
| EIC     | Negative | 389.0681 | 1.95 | unknown | 0       | 636466   | 0       | 0       | 495700  | 417753  | 572657  | 0       | 235212   | 0       | 657039   | 693998  | 707899   | 634456   | 968088   | 530622   | 524609  | 0       | 546796   |
| EIC     | Negative | 618.3421 | 2.85 | unknown | 426402  | 674662   | 318774  | 245058  | 571117  | 959579  | 664409  | 347823  | 677786   | 490539  | 681918   | 990897  | 642493   | 497991   | 900339   | 1051243  | 1116309 | 364515  | 1378561  |
| EIC     | Negative | 349.0388 | 1.99 | unknown | 0       | 253789   | 243047  | 0       | 115529  | 500708  | 233702  | 0       | 121786   | 0       | 773146   | 300721  | 184094   | 69545    | 299966   | 682632   | 0       | 419378  | 0        |
| EIC     | Negative | 363.2096 | 3.91 | unknown | 0       | 0        | 0       | 0       | 969106  | 0       | 1751989 | 0       | 1033025  | 0       | 0        | 1063242 | 0        | 138632   | 0        | 0        | 0       | 4781601 | 840111   |
| fpHILIC | Negative | 280.1039 | 3.18 | unknown | 637391  | 1257517  | 752475  | 594822  | 872196  | 1200154 | 1215668 | 585537  | 622864   | 672250  | 1469753  | 1394827 | 1474871  | 1107393  | 1826859  | 1254648  | 1245210 | 956047  | 1498888  |
| EIC     | Negative | 436.2719 | 2.87 | unknown | 75747   | 155318   | 132007  | 153830  | 183168  | 178858  | 142862  | 120378  | 121621   | 93380   | 119304   | 136552  | 191352   | 193835   | 190410   | 237016   | 264224  | 200328  | 229347   |
| EIC     | Negative | 304.1591 | 1.88 | unknown | 193123  | 123888   | 0       | 0       | 85469   | 152077  | 113218  | 0       | 63511    | 0       | 135842   | 207438  | 134495   | 249908   | 153395   | 164327   | 136010  | 0       | 168541   |
| EIC     | Negative | 407.2347 | 1.87 | unknown | 515051  | 2032393  | 0       | 0       | 470965  | 1036682 | 1499448 | 0       | 2167898  | 0       | 2711502  | 835664  | 2405136  | 2481069  | 1966574  | 2570727  | 1418296 | 0       | 1822917  |
| EIC     | Negative | 331.1913 | 1.47 | unknown | 0       | 441337   | 0       | 202207  | 368763  | 192098  | 434843  | 0       | 423902   | 0       | 326059   | 426172  | 476160   | 587270   | 571518   | 707027   | 431720  | 0       | 421813   |
| EIC     | Negative | 472.2214 | 2.72 | unknown | 1046785 | 1626475  | 1272307 | 2592332 | 2705769 | 2887278 | 3225798 | 2412125 | 3241916  | 3058212 | 3540543  | 3570873 | 4196787  | 4100441  | 4386137  | 4351435  | 4424499 | 4350746 | 4276243  |
| EIC     | Negative | 510.2909 | 6.36 | unknown | 936773  | 1213600  | 1449595 | 1253817 | 1325456 | 1322730 | 1488951 | 1822506 | 1110992  | 1343311 | 1725455  | 175441  | 1416574  | 3045515  | 2801045  | 1213333  | 1824272 | 2700941 | 2120872  |
| EIC     | Negative | 435.2692 | 2.88 | unknown | 475825  | 899973   | 579073  | 985529  | 1169715 | 1039321 | 908076  | 774303  | 744480   | 574928  | 744423   | 822623  | 1187070  | 1180923  | 1272190  | 1501797  | 1573279 | 1182119 | 1464106  |
| EIC     | Negative | 395.1842 | 5.66 | unknown | 0       | 1064905  | 0       | 1109095 | 954418  | 76728   | 1066162 | 0       | 1068942  | 1249230 | 1248283  | 1161712 | 1478274  | 1021540  | 0        | 1567502  | 1553923 | 0       | 1695144  |
| EIC     | Negative | 241.0506 | 1.40 | unknown | 0       | 0        | 0       | 0       | 0       | 0       | 0       | 0       | 0        | 0       | 0        | 0       | 0        | 0        | 50136    | 88783    | 114817  | 0       | 94319    |
| EIC     | Negative | 294.1821 | 3.30 | unknown | 0       | 0        | 0       | 0       | 726980  | 0       | 0       | 0       | 0        | 0       | 0        | 5944    | 4100     | 0        | 0        | 0        | 453006  | 649114  | 0        |
| EIC     | Negative | 289.1812 | 5.08 | unknown | 448503  | 481946   | 535386  | 446418  | 746562  | 378887  | 646975  | 602880  | 692999   | 348957  | 620256   | 479668  | 887008   | 408323   | 854671   | 1008161  | 1214625 | 617625  | 958073   |
| fpHILIC | Negative | 233.0570 | 0.96 | unknown | 436994  | 191319   | 67482   | 76660   | 324168  | 141253  | 322605  | 87074   | 366849   | 115054  | 129903   | 292553  | 218773   | 476071   | 663572   | 218349   | 321249  | 221763  | 459673   |
| EIC     | Negative | 406.2318 | 1.87 | unknown | 3507397 | 12097781 | 0       | 575203  | 2859547 | 5145967 | 8991646 | 539064  | 13102389 | 868451  | 14147563 | 4286540 | 13999305 | 15194804 | 11714465 | 15307117 | 8683955 | 0       | 10867956 |
| EIC     | Negative | 330.2368 | 2.01 | unknown | 409030  | 196370   | 204622  | 0       | 209526  | 663319  | 424295  | 137098  | 299127   | 0       | 176037   | 285281  | 239623   | 167360   | 151629   | 1920624  | 304300  | 0       | 258407   |
| EIC     | Negative | 383.1813 | 1.87 | unknown | 248144  | 846895   | 0       | 0       | 297607  | 405696  | 694341  | 0       | 947343   | 0       | 1006608  | 424613  | 1023842  | 1102546  | 893924   | 1109077  | 647186  | 0       | 919865   |
| fpHILIC | Negative | 264.9424 | 4.61 | unknown | 655704  | 269548   | 59967   | 151824  | 420532  | 703901  | 233957  | 212434  | 475207   | 107468  | 105828   | 530442  | 371801   | 543451   | 343057   | 948255   | 657506  | 531187  | 635355   |
| fpHILIC | Negative | 197.0314 | 1.73 | unknown | 0       | 584761   | 657704  | 930659  | 916556  | 0       | 954179  | 101492  | 1088989  | 868636  | 584848   | 748333  | 742004   | 938776   | 971392   | 851923   | 1341664 | 1289013 | 1446119  |
| fpHILIC | Negative | 144.0456 | 0.57 | unknown | 7385458 | 2136413  | 1275941 | 1610257 | 3744880 | 3687505 | 4756926 | 2991814 | 3803665  | 1259104 | 2298237  | 5112258 | 3091370  | 6517663  | 6332166  | 4165937  | 6624647 | 5402164 | 6447134  |
| EIC     | Negative | 463.1444 | 1.87 | unknown | 0       | 208800   | 0       | 0       | 42562   | 100437  | 164621  | 0       | 202616   | 0       | 91424    | 281287  | 290222   | 270216   | 214937   | 233313   | 174647  | 0       | 162422   |
| EIC     | Negative | 642.3422 | 2.59 | unknown | 881901  | 1442099  | 353087  | 604513  | 766024  | 1649651 | 776293  | 472540  | 1601464  | 984176  | 1349147  | 1766897 | 1276639  | 637693   | 1201366  | 2239635  | 1959519 | 440000  | 2230236  |
| EIC     | Negative | 382.1876 | 1.87 | unknown | 176083  | 623579   | 0       | 0       | 180435  | 282717  | 461516  | 0       | 640034   | 0       | 649789   | 335594  | 722156   | 817108   | 610644   | 747704   | 455932  | 0       | 539944   |
| EIC     | Negative | 381.1842 | 1.87 | unknown | 655419  | 2568102  | 0       | 0       | 706721  | 1224863 | 2016770 | 0       | 2810822  | 0       | 2938518  | 1099278 | 3050475  | 3367008  | 2694181  | 3238515  | 1941405 | 0       | 2537691  |
| EIC     | Negative | 408.2476 | 1.51 | unknown | 0       | 420780   | 0       | 375781  | 210949  | 313618  | 289393  | 0       | 289630   | 0       | 585479   | 206282  | 487341   | 553724   | 268978   | 565937   | 185185  | 345921  | 361961   |
| fpHILIC | Positive | 228.1958 | 0.49 | unknown | 1101888 | 876240   | 1134405 | 1395718 | 891391  | 832901  | 1105003 | 923800  | 1121317  | 1565922 | 629143   | 1685555 | 2625708  | 529581   | 1326362  | 1125521  | 1938113 | 1894444 | 1275171  |
| EIC     | Negative | 344.2315 | 4.64 | unknown | 408386  | 323571   | 55486   | 1030310 | 307487  | 304633  | 281229  | 301599  | 1227978  | 173068  | 176231   | 406512  | 960537   | 432000   | 401377   | 729709   | 1243683 | 869612  | 520792   |
| EIC     | Negative | 388.2429 | 4.60 | unknown | 465908  | 784841   | 393776  | 517548  | 638523  | 685291  | 591305  | 515984  | 571641   | 320711  | 590385   | 634131  | 938568   | 888512   | 913922   | 1019515  | 1041902 | 633092  | 1075603  |
| EIC     | Negative | 294.0968 | 1.08 | unknown | 0       | 12264    | 0       | 50518   | 3920    | 21366   | 3341    | 62432   | 64944    | 0       | 22811    | 43046   | 92519    | 81413    | 5373     | 20036    | 134281  | 64342   | 19437    |
| EIC     | Negative | 370.2319 | 1.81 | unknown | 113989  | 60941    | 0       | 0       | 72013   | 131529  | 0       | 167738  | 437453   | 0       | 88591    | 278296  | 437188   | 514727   | 85220    | 94302    | 936608  | 0       | 83387    |
| EIC     | Negative | 425.2765 | 1.67 | unknown | 25650   | 72506    | 0       | 0       | 80407   | 65938   | 69254   | 20354   | 75450    | 49678   | 79677    | 66227   | 74895    | 66053    | 74361    | 201023   | 89937   | 52040   | 72567    |
| EIC     | Negative | 511.4731 | 6.54 | unknown | 3269671 | 4255423  | 4199197 | 7008315 | 5371197 | 3304241 | 5507724 | 6480638 | 7765070  | 6       |          |         |          |          |          |          |         |         |          |

|         |          |          |      |         |          |         |          |          |          |          |          |          |          |          |          |          |          |          |          |          |          |          |          |
|---------|----------|----------|------|---------|----------|---------|----------|----------|----------|----------|----------|----------|----------|----------|----------|----------|----------|----------|----------|----------|----------|----------|----------|
| EIC     | Negative | 374.2452 | 2.94 | unknown | 664734   | 1086153 | 791576   | 1366484  | 1469565  | 1294358  | 1081973  | 1160563  | 1059364  | 760274   | 946037   | 1256409  | 1585648  | 1650658  | 1775035  | 2058147  | 2245278  | 1845954  | 2145064  |
| EIC     | Negative | 613.5415 | 6.54 | unknown | 5134043  | 4835236 | 6890793  | 10563427 | 6525653  | 5784589  | 7930283  | 8607938  | 10253212 | 22088720 | 10321956 | 9125815  | 16417277 | 16128293 | 10225443 | 12504376 | 16428257 | 11228442 | 14625204 |
| EIC     | Negative | 518.2877 | 2.94 | unknown | 84980    | 79392   | 62047    | 62047    | 78809    | 210660   | 41876    | 445933   | 63677    | 76829    | 0        | 63672    | 5266     | 2450     | 266750   | 79783    | 63534    | 908944   | 83943    |
| EIC     | Negative | 434.2663 | 2.94 | unknown | 1445662  | 2215782 | 1687816  | 2785439  | 3143090  | 2698536  | 2244287  | 2318580  | 2116593  | 1615530  | 2096260  | 2519320  | 3346752  | 3434922  | 3739064  | 4366966  | 4567448  | 3829452  | 4392720  |
| EIC     | Negative | 389.1982 | 3.11 | unknown | 0        | 91921   | 0        | 18221    | 29879    | 105767   | 42247    | 0        | 44581    | 15767    | 80916    | 157347   | 132628   | 74532    | 100146   | 81648    | 83272    | 20723    | 86394    |
| EIC     | Negative | 294.2156 | 4.74 | unknown | 105197   | 127919  | 147518   | 214804   | 166403   | 145959   | 180576   | 157536   | 221558   | 135643   | 100467   | 127505   | 113252   | 102907   | 112705   | 874303   | 159116   | 184570   | 130680   |
| EIC     | Negative | 408.2472 | 2.20 | unknown | 0        | 408369  | 0        | 1126323  | 469342   | 293364   | 699282   | 147504   | 527183   | 881493   | 748780   | 320658   | 656705   | 589524   | 431026   | 784029   | 389196   | 1194361  | 614783   |
| fpHILIC | Positive | 188.0345 | 2.98 | unknown | 2012126  | 2189684 | 1533622  | 435089   | 1997702  | 2047720  | 1007860  | 1754348  | 1977676  | 1349605  | 1403059  | 1666020  | 1332005  | 7196896  | 5134088  | 1315959  | 2063937  | 2177690  | 4068990  |
| EIC     | Negative | 443.1672 | 2.59 | unknown | 0        | 0       | 0        | 0        | 56055    | 0        | 65813    | 0        | 51211    | 0        | 75244    | 94844    | 139893   | 82974    | 88085    | 52138    | 81620    | 0        | 69498    |
| EIC     | Negative | 573.2321 | 1.93 | unknown | 0        | 426877  | 0        | 0        | 377748   | 321425   | 568997   | 0        | 323687   | 0        | 408431   | 601601   | 523522   | 562086   | 503097   | 630249   | 974279   | 0        | 57962    |
| EIC     | Negative | 408.2395 | 1.87 | unknown | 57040    | 141682  | 0        | 0        | 0        | 84649    | 148385   | 0        | 232260   | 0        | 204438   | 0        | 246827   | 249699   | 221320   | 275465   | 140904   | 0        | 147965   |
| EIC     | Negative | 471.3480 | 6.54 | unknown | 977287   | 549675  | 754995   | 1105692  | 877531   | 663085   | 1008137  | 1078650  | 1008619  | 1907781  | 1480890  | 760709   | 1018805  | 1568463  | 1913229  | 2276041  | 1024892  | 1180683  | 1436033  |
| EIC     | Negative | 391.1740 | 2.73 | unknown | 237042   | 280540  | 108676   | 136792   | 263585   | 214062   | 325161   | 159557   | 193673   | 420510   | 254948   | 280487   | 304634   | 322419   | 426208   | 227203   | 418411   | 479028   | 401986   |
| fpHILIC | Positive | 304.0993 | 3.16 | unknown | 269193   | 989773  | 417730   | 369171   | 440624   | 664877   | 699282   | 365565   | 468504   | 534943   | 874877   | 1006101  | 943030   | 1002246  | 1091288  | 784186   | 775119   | 689399   | 1117869  |
| EIC     | Negative | 435.2409 | 4.03 | unknown | 0        | 0       | 0        | 0        | 97765    | 0        | 0        | 0        | 0        | 123136   | 0        | 0        | 0        | 0        | 0        | 0        | 0        | 165500   | 0        |
| EIC     | Negative | 346.1740 | 2.45 | unknown | 256707   | 530579  | 264663   | 220058   | 255570   | 466822   | 418706   | 290551   | 291739   | 185578   | 580789   | 677287   | 828003   | 564321   | 759614   | 556907   | 544595   | 942620   | 114153   |
| EIC     | Negative | 335.1405 | 2.27 | unknown | 0        | 0       | 0        | 0        | 0        | 0        | 275430   | 0        | 0        | 0        | 0        | 110475   | 0        | 0        | 0        | 0        | 0        | 467174   | 0        |
| EIC     | Negative | 411.1997 | 2.60 | unknown | 88376    | 63442   | 0        | 0        | 63568    | 134998   | 30519    | 0        | 47930    | 0        | 81066    | 59131    | 41071    | 170235   | 132406   | 38303    | 135272   | 0        | 163884   |
| EIC     | Negative | 329.2337 | 2.01 | unknown | 2621228  | 1046127 | 874101   | 611334   | 1008584  | 2825485  | 2199322  | 521837   | 1625242  | 758981   | 789420   | 1495374  | 1191844  | 1009416  | 905883   | 9403001  | 1901566  | 607386   | 1221001  |
| EIC     | Negative | 433.2213 | 1.48 | unknown | 0        | 255528  | 0        | 0        | 129429   | 117234   | 206420   | 0        | 171196   | 0        | 212724   | 244775   | 220338   | 260439   | 340488   | 248011   | 0        | 214773   | 0        |
| EIC     | Negative | 472.3509 | 6.54 | unknown | 340574   | 235210  | 277445   | 355827   | 337912   | 247802   | 331919   | 374002   | 359605   | 552837   | 520058   | 253845   | 383752   | 431310   | 736651   | 795055   | 357960   | 459331   | 471120   |
| EIC     | Negative | 490.3260 | 2.87 | unknown | 0        | 75275   | 0        | 0        | 57275    | 145200   | 86417    | 0        | 61235    | 201224   | 114650   | 112466   | 90302    | 105774   | 156440   | 108766   | 105575   | 123305   | 102244   |
| EIC     | Negative | 628.3973 | 2.68 | unknown | 101159   | 243677  | 139809   | 201887   | 228485   | 126126   | 199484   | 90413    | 292493   | 79149    | 144383   | 181127   | 316045   | 330721   | 327955   | 597594   | 273184   | 174337   | 235442   |
| EIC     | Negative | 528.3215 | 5.42 | unknown | 0        | 0       | 0        | 0        | 0        | 0        | 1594783  | 0        | 0        | 0        | 0        | 0        | 0        | 0        | 0        | 1152011  | 0        | 0        | 1602242  |
| EIC     | Negative | 447.3483 | 6.54 | unknown | 4878675  | 2555609 | 3544045  | 3696406  | 4168949  | 2846396  | 4419189  | 4140887  | 4009104  | 6041930  | 6556937  | 3389765  | 5393858  | 6218828  | 9412820  | 8620355  | 4551196  | 4958159  | 6309580  |
| EIC     | Negative | 428.1767 | 2.31 | unknown | 52492    | 306793  | 64245    | 223953   | 122317   | 151647   | 188064   | 226070   | 190661   | 489260   | 246920   | 403629   | 328247   | 304921   | 304786   | 253711   | 243744   | 482222   | 230516   |
| EIC     | Negative | 301.0598 | 0.70 | unknown | 18542    | 42225   | 32856    | 35243    | 37161    | 41357    | 56149    | 53624    | 33409    | 49435    | 69941    | 71963    | 73724    | 78438    | 82133    | 85807    | 81387    | 97963    | 36324    |
| fpHILIC | Positive | 303.2315 | 0.37 | unknown | 295106   | 143736  | 103231   | 980821   | 120703   | 196687   | 109774   | 443742   | 967468   | 110744   | 185188   | 466579   | 1046864  | 592865   | 170806   | 209523   | 1455667  | 980814   | 366615   |
| EIC     | Negative | 451.2654 | 4.06 | unknown | 0        | 284706  | 0        | 0        | 102705   | 362127   | 0        | 96675    | 169382   | 0        | 246564   | 209041   | 178821   | 465173   | 284410   | 236083   | 229338   | 207293   | 314381   |
| EIC     | Negative | 379.1412 | 0.60 | unknown | 11926    | 0       | 0        | 0        | 37686    | 0        | 7242     | 0        | 94981    | 104073   | 0        | 66884    | 114886   | 63157    | 0        | 0        | 25403    | 102734   | 0        |
| fpHILIC | Positive | 192.1596 | 0.59 | unknown | 3495045  | 1719963 | 1795606  | 3654699  | 7115196  | 2129285  | 2399805  | 2698491  | 4122164  | 1934989  | 4600083  | 4802553  | 3231586  | 2169515  | 12475827 | 3736803  | 10551953 | 2673543  | 2685182  |
| fpHILIC | Positive | 251.1025 | 0.50 | unknown | 556533   | 105945  | 62694    | 196677   | 359919   | 261667   | 597223   | 316415   | 466788   | 110884   | 87704    | 367982   | 433721   | 711362   | 858721   | 233748   | 802821   | 571440   | 1037889  |
| EIC     | Negative | 417.3226 | 6.55 | unknown | 15724501 | 8889110 | 10888284 | 16048001 | 17038663 | 15999903 | 14673391 | 20657738 | 25579516 | 26082990 | 25935190 | 20794314 | 30065995 | 33854257 | 33888290 | 26090991 | 25964213 | 34240454 | 45026711 |
| EIC     | Negative | 387.1464 | 2.97 | unknown | 32559    | 43019   | 0        | 24582    | 64073    | 52350    | 53565    | 57280    | 51490    | 65880    | 109535   | 112511   | 103108   | 128536   | 105244   | 105657   | 120437   | 87349    | 744722   |
| EIC     | Negative | 348.2631 | 5.60 | unknown | 120578   | 32961   | 40155    | 246810   | 83964    | 77491    | 40682    | 96764    | 222127   | 51604    | 20401    | 124824   | 204231   | 127697   | 116818   | 114371   | 314802   | 301844   | 78228    |
| EIC     | Negative | 574.2347 | 1.93 | unknown | 0        | 133873  | 0        | 0        | 120928   | 94183    | 171763   | 0        | 90461    | 0        | 138032   | 206056   | 156066   | 194396   | 150487   | 207086   | 313095   | 0        | 179168   |
| EIC     | Negative | 598.3077 | 6.32 | unknown | 63362    | 169774  | 302569   | 248951   | 254108   | 476778   | 351651   | 449359   | 307517   | 395159   | 553488   | 526430   | 593427   | 421621   | 981185   | 386265   | 612495   | 877666   | 0        |
| fpHILIC | Negative | 223.0750 | 2.81 | unknown | 199540   | 182988  | 232479   | 196067   | 245641   | 560978   | 264387   | 203086   | 384795   | 197518   | 224203   | 322983   | 615671   | 197098   | 106592   | 2064897  | 263787   | 311949   | 213388   |
| fpHILIC | Negative | 133.0508 | 1.00 | unknown | 308027   | 341809  | 336063   | 369489   | 418922   | 484341   | 267326   | 355527   | 293710   | 389382   | 501918   | 442999   | 398206   | 1072694  | 534035   | 437305   | 722824   | 574000   | 979425   |
| EIC     | Negative | 333.2200 | 5.72 | unknown | 0        | 406800  | 0        | 0        | 573047   | 464062   | 488544   | 0        | 465005   | 0        | 263793   | 294354   | 418642   | 397231   | 316164   | 1862640  | 312130   | 642557   | 427871   |
| EIC     | Negative | 300.1685 | 1.92 | unknown | 0        | 215829  | 0        | 0        | 103548   | 149970   | 195621   | 0        | 90125    | 0        | 269885   | 354798   | 302234   | 228895   | 276025   | 905792   | 237817   | 0        | 193532   |
| EIC     | Negative | 639.5575 | 6.55 | unknown | 21079025 | 9773642 | 12650727 | 19838170 | 20118860 | 17911856 | 17016775 | 19484049 | 35501663 | 28073512 | 33964156 | 25276385 | 46857760 | 43845019 | 39826672 | 29979489 | 32219340 | 46247394 | 49112033 |
| EIC     | Negative | 409.2608 | 1.16 | unknown | 23291    | 13882   | 19949    | 0        | 46243    | 30010    | 41229    | 68838    | 50853    | 50853    | 24032    | 24237    | 15871    | 37308    | 84740    | 48007    | 73716    | 230078   | 158121   |
| EIC     | Negative | 443.1837 | 1.87 | unknown | 196674   | 518832  | 0        | 0        | 214239   | 419868   | 763625   | 0        | 1162105  | 0        | 1295190  | 400408   | 1450850  | 1426583  | 1150372  | 1543454  | 868319   | 0        | 1074431  |
| EIC     | Negative | 418.3260 | 6.55 | unknown | 3974656  | 2333256 | 2675285  | 4068136  | 4293480  | 3986187  | 3651262  | 5195810  | 6162061  | 6728263  | 7578637  | 5329722  | 7715182  | 8658105  | 8649115  | 6740887  | 6715584  | 8656772  | 11674210 |
| EIC     | Negative | 449.1948 | 1.48 | unknown | 0        | 49369   | 0        | 0        | 47286    | 64699    | 101255   | 0        | 64880    | 0        | 106167   | 111668   | 147093   | 98206    | 123985   | 162041   | 119653   | 0        | 99969    |
| EIC     | Negative | 640.5612 | 6.55 | unknown | 9056136  | 4270666 | 5652907  | 8423234  | 8576747  | 7552535  | 7448495  | 8394838  | 15461905 | 12515420 | 17488586 | 10946554 | 20579354 | 19303543 | 17612710 | 13238147 | 14084629 | 20332066 | 21104589 |
| EIC     | Negative | 409.2609 | 1.41 | unknown | 0        | 41279   | 0        | 0        | 266334   | 237083   | 183733   | 0        | 187051   | 0        | 161505   | 162403   | 54956    | 220531   | 427738   | 301013   | 535665   | 0        | 287947   |
| fpHILIC | Negative | 305.1432 | 0.90 | unknown | 1556632  | 1027879 | 1328494  | 1340222  | 1385544  | 1126208  | 1296336  | 1499892  | 1133297  | 1913079  | 1575661  | 1880030  | 1521712  | 1753319  | 1510931  | 3036757  | 1895032  | 3989654  | 1336672  |
| EIC     | Negative | 329.2389 | 6.06 | unknown | 0        | 359600  | 0        | 0        | 0        | 0        | 867887   | 0        | 0        | 0        | 368949   | 0        | 0        | 0        | 427789   | 244132   | 276408   | 638642   | 0        |
| EIC     | Negative | 512.2635 | 2.38 | unknown | 0        | 73657   | 0        | 0        | 32272    | 30074    | 58146    | 0        | 124081   | 460671   | 65023    | 34922    | 66835    | 80976    | 221388   | 95315    | 64980    | 0        | 66642    |



|         |          |          |      |         |         |         |         |          |          |         |         |          |          |         |          |         |          |          |          |          |          |          |          |
|---------|----------|----------|------|---------|---------|---------|---------|----------|----------|---------|---------|----------|----------|---------|----------|---------|----------|----------|----------|----------|----------|----------|----------|
| EIC     | Negative | 447.2058 | 1.92 | unknown | 0       | 470244  | 0       | 0        | 179823   | 184577  | 200555  | 0        | 201141   | 0       | 380337   | 362165  | 269156   | 297899   | 304621   | 528359   | 444801   | 0        | 290211   |
| EIC     | Negative | 306.1462 | 2.97 | unknown | 250776  | 252826  | 273284  | 279366   | 389950   | 318220  | 387684  | 289714   | 416738   | 484237  | 741345   | 866952  | 721521   | 943939   | 699682   | 789498   | 979398   | 738013   | 496493   |
| EIC     | Negative | 433.2214 | 1.98 | unknown | 0       | 246378  | 0       | 0        | 85498    | 107404  | 158155  | 0        | 104789   | 0       | 214418   | 221426  | 137080   | 148497   | 168728   | 271621   | 287162   | 0        | 214550   |
| EIC     | Negative | 305.1431 | 2.97 | unknown | 1554841 | 1544463 | 1597431 | 1720644  | 2410061  | 1994085 | 2368572 | 1653166  | 2462162  | 3104566 | 4599261  | 5267304 | 4489725  | 5640429  | 4450312  | 4748770  | 5802576  | 4522711  | 3088531  |
| EIC     | Negative | 434.2237 | 1.92 | unknown | 0       | 364517  | 0       | 0        | 143199   | 137507  | 156923  | 0        | 164267   | 0       | 314695   | 2529306 | 225261   | 239713   | 242882   | 395672   | 366624   | 0        | 246133   |
| EIC     | Negative | 423.2260 | 3.91 | unknown | 46435   | 27813   | 0       | 0        | 91548    | 138827  | 52462   | 165214   | 88611    | 0       | 531786   | 84829   | 24874    | 0        | 0        | 593092   | 82231    | 421358   | 19537    |
| EIC     | Negative | 483.2365 | 4.76 | unknown | 161238  | 41267   | 0       | 366668   | 32653    | 49466   | 0       | 205968   | 375075   | 21791   | 95440    | 239535  | 387424   | 294825   | 166674   | 106180   | 482054   | 526082   | 107477   |
| EIC     | Negative | 251.1322 | 3.31 | unknown | 0       | 0       | 0       | 0        | 0        | 115025  | 0       | 0        | 0        | 0       | 0        | 0       | 123306   | 0        | 0        | 101465   | 139485   | 0        | 0        |
| EIC     | Negative | 412.2424 | 1.99 | unknown | 0       | 189704  | 0       | 0        | 49945    | 97827   | 93954   | 0        | 107667   | 0       | 191921   | 179470  | 113734   | 83475    | 103195   | 278756   | 197884   | 0        | 159535   |
| EIC     | Negative | 448.2731 | 3.02 | unknown | 162583  | 87134   | 162700  | 331670   | 140365   | 115343  | 270135  | 232776   | 259256   | 172227  | 223876   | 308248  | 434195   | 61978    | 54892    | 555175   | 536080   | 485113   | 547048   |
| fpHILIC | Positive | 404.1774 | 4.66 | unknown | 385110  | 63649   | 0       | 214123   | 42850    | 110152  | 0       | 253461   | 729497   | 0       | 49017    | 335581  | 454840   | 780583   | 117324   | 100502   | 1288681  | 607589   | 326937   |
| EIC     | Negative | 325.2658 | 5.83 | unknown | 1053251 | 0       | 0       | 0        | 1457354  | 0       | 0       | 0        | 1102166  | 1186517 | 1228175  | 0       | 0        | 0        | 1361452  | 775840   | 0        | 2173302  | 1202837  |
| EIC     | Negative | 361.2013 | 3.54 | unknown | 345490  | 169162  | 142475  | 629698   | 76136    | 247968  | 46791   | 436146   | 1026191  | 41968   | 213714   | 627072  | 961800   | 1080850  | 220619   | 162873   | 1800057  | 1568262  | 201384   |
| EIC     | Negative | 448.2797 | 3.02 | unknown | 0       | 266515  | 151551  | 376493   | 350554   | 271611  | 305453  | 110362   | 308833   | 0       | 244390   | 354586  | 495980   | 435420   | 439924   | 657712   | 612453   | 570892   | 634508   |
| EIC     | Negative | 433.2212 | 1.92 | unknown | 0       | 1543926 | 0       | 0        | 562336   | 569821  | 656399  | 0        | 649588   | 0       | 1256685  | 1202000 | 917056   | 1029001  | 1083358  | 1682439  | 1508239  | 0        | 1039432  |
| EIC     | Negative | 580.3622 | 4.53 | unknown | 2461359 | 2308647 | 1865130 | 2255878  | 15055338 | 1549282 | 2020427 | 1584922  | 2095975  | 1616980 | 1809578  | 2211171 | 2231565  | 1906737  | 15277646 | 2022195  | 14796695 | 14717400 | 1877729  |
| EIC     | Negative | 526.2845 | 5.06 | unknown | 0       | 0       | 0       | 0        | 3822612  | 0       | 0       | 1326455  | 2351558  | 3525434 | 0        | 0       | 0        | 4252170  | 1285772  | 2872855  | 0        | 3041508  |          |
| fpHILIC | Negative | 319.2276 | 0.38 | unknown | 1533081 | 884822  | 754092  | 5223019  | 1095040  | 1490434 | 917547  | 2443092  | 4891384  | 662254  | 1245090  | 2963014 | 6224401  | 3916574  | 1652489  | 1562688  | 11370218 | 7262106  | 2335896  |
| fpHILIC | Negative | 115.0039 | 0.83 | unknown | 842564  | 1748616 | 1164794 | 951208   | 1362030  | 1743370 | 878961  | 871459   | 853775   | 736588  | 834214   | 1176760 | 1168168  | 1057974  | 1163126  | 1887228  | 1625811  | 2119593  | 5946747  |
| EIC     | Negative | 319.1599 | 3.13 | unknown | 0       | 14323   | 0       | 0        | 161069   | 54016   | 67223   | 0        | 80218    | 94430   | 464988   | 0       | 169666   | 50243    | 133567   | 139630   | 124672   | 159564   | 430757   |
| EIC     | Negative | 319.2280 | 3.84 | unknown | 0       | 0       | 0       | 11536961 | 0        | 0       | 0       | 10742769 | 12211002 | 0       | 13254241 | 0       | 0        | 0        | 12807031 | 13063435 | 13073225 | 0        | 12557610 |
| EIC     | Negative | 261.0220 | 1.95 | unknown | 0       | 87357   | 0       | 0        | 68274    | 84071   | 75412   | 0        | 79343    | 0       | 81927    | 99682   | 152679   | 88843    | 74692    | 115079   | 415765   | 0        | 96913    |
| EIC     | Negative | 644.3514 | 2.67 | unknown | 0       | 0       | 0       | 0        | 103479   | 96263   | 0       | 0        | 0        | 74247   | 47154    | 173417  | 131464   | 0        | 0        | 0        | 213269   | 0        | 247169   |
| EIC     | Negative | 439.2258 | 6.22 | unknown | 228398  | 445575  | 96245   | 126551   | 509791   | 934904  | 136885  | 310040   | 392946   | 209372  | 184768   | 1004289 | 333142   | 237674   | 219992   | 2576868  | 312395   | 1158751  | 1023199  |
| EIC     | Negative | 440.2297 | 6.22 | unknown | 42124   | 103859  | 0       | 36867    | 137997   | 225718  | 36114   | 73718    | 115387   | 55138   | 0        | 264681  | 83116    | 60410    | 55422    | 677402   | 83546    | 300167   | 251660   |
| EIC     | Negative | 492.3421 | 3.19 | unknown | 78208   | 63892   | 79868   | 53809    | 73239    | 83718   | 70175   | 88099    | 68477    | 259107  | 174527   | 196853  | 101984   | 79767    | 241648   | 252990   | 109846   | 221376   | 627929   |
| EIC     | Negative | 491.3381 | 3.19 | unknown | 280406  | 206200  | 266665  | 177343   | 223410   | 272877  | 205844  | 242695   | 217040   | 761556  | 513650   | 603105  | 329115   | 254401   | 755012   | 781170   | 309244   | 689318   | 231597   |
| EIC     | Negative | 321.2342 | 4.76 | unknown | 809634  | 290549  | 0       | 2337982  | 222674   | 447446  | 259568  | 1229778  | 2173200  | 0       | 393931   | 1347914 | 2881081  | 2078143  | 700177   | 560718   | 4852779  | 3611969  | 596897   |
| EIC     | Negative | 279.1968 | 3.54 | unknown | 2773068 | 1360117 | 298375  | 8478730  | 495603   | 2736846 | 211330  | 5168821  | 11227278 | 613202  | 2518799  | 7242601 | 11069322 | 12647701 | 2119106  | 1981807  | 2283990  | 18713170 | 1599416  |
| EIC     | Negative | 441.2524 | 0.88 | unknown | 21271   | 52716   | 30714   | 25923    | 164287   | 152557  | 108026  | 69758    | 108624   | 62095   | 109187   | 77710   | 53280    | 84532    | 216751   | 217322   | 316796   | 344487   | 290839   |
| EIC     | Negative | 280.2000 | 3.54 | unknown | 507709  | 263825  | 76218   | 1370252  | 104815   | 496487  | 47693   | 897996   | 2137974  | 135444  | 489398   | 1320344 | 2117518  | 2360894  | 471210   | 407491   | 4345839  | 3464838  | 329259   |
| EIC     | Negative | 328.1846 | 2.19 | unknown | 32331   | 0       | 0       | 0        | 0        | 106384  | 0       | 51941    | 0        | 0       | 0        | 0       | 0        | 0        | 0        | 276950   | 0        | 111439   | 0        |
| fpHILIC | Negative | 259.0906 | 3.16 | unknown | 67290   | 267825  | 39311   | 0        | 129846   | 209286  | 126221  | 63285    | 99852    | 74623   | 304169   | 375648  | 272409   | 557380   | 494640   | 324948   | 188837   | 150183   | 384792   |
| EIC     | Negative | 320.2312 | 4.76 | unknown | 5832006 | 2297050 | 507973  | 17278146 | 1627731  | 3117386 | 1586759 | 8857965  | 16462577 | 1124978 | 3491684  | 9968528 | 21638369 | 15773773 | 5348044  | 4169274  | 36098360 | 27919501 | 4466747  |
| EIC     | Negative | 449.1948 | 1.92 | unknown | 0       | 262761  | 0       | 0        | 150465   | 169347  | 239078  | 0        | 221741   | 0       | 438257   | 347874  | 361475   | 396780   | 618625   | 567470   | 0        | 0        | 362029   |
| EIC     | Negative | 577.3016 | 5.05 | unknown | 122847  | 577339  | 128716  | 329880   | 332943   | 560852  | 347511  | 217125   | 331828   | 525916  | 1209937  | 814954  | 1356474  | 693173   | 919412   | 955471   | 1118496  | 557812   | 936205   |
| EIC     | Negative | 429.1684 | 2.75 | unknown | 0       | 0       | 0       | 0        | 107668   | 152155  | 258085  | 0        | 127842   | 268044  | 253449   | 363591  | 428705   | 358245   | 269684   | 275815   | 234853   | 504598   | 335282   |
| EIC     | Negative | 309.1546 | 3.58 | unknown | 0       | 0       | 0       | 0        | 0        | 47702   | 0       | 87623    | 0        | 0       | 0        | 0       | 0        | 0        | 0        | 107216   | 141621   | 91727    | 0        |
| EIC     | Negative | 307.1587 | 4.43 | unknown | 185968  | 493947  | 122469  | 162522   | 447474   | 598138  | 185982  | 173427   | 3522699  | 240609  | 141661   | 81246   | 199640   | 286388   | 395238   | 117489   | 5254598  | 6467779  | 271277   |
| EIC     | Negative | 322.2371 | 4.76 | unknown | 80452   | 27814   | 0       | 263168   | 0        | 47738   | 0       | 156172   | 219867   | 0       | 43203    | 152188  | 332314   | 233152   | 93842    | 52758    | 520933   | 325147   | 90861    |
| EIC     | Negative | 355.2054 | 4.76 | unknown | 403668  | 131461  | 30606   | 1094524  | 114814   | 192090  | 105300  | 528892   | 971905   | 95236   | 175696   | 611783  | 1339336  | 911642   | 296222   | 275749   | 2204411  | 1808491  | 323171   |
| EIC     | Negative | 432.2108 | 1.02 | unknown | 22330   | 0       | 17887   | 20726    | 0        | 11288   | 22407   | 0        | 0        | 28852   | 0        | 183700  | 197359   | 0        | 307143   | 268659   | 16024    | 21850    | 16465    |
| EIC     | Negative | 299.2530 | 5.50 | unknown | 0       | 0       | 0       | 0        | 0        | 1961860 | 0       | 0        | 0        | 1880055 | 1234660  | 0       | 1462121  | 0        | 795826   | 1374076  | 1571242  | 0        | 1354572  |
| EIC     | Negative | 290.1433 | 1.87 | unknown | 0       | 10091   | 0       | 0        | 0        | 88226   | 23010   | 0        | 0        | 0       | 31925    | 26775   | 35562    | 12405    | 0        | 140458   | 119623   | 0        | 30868    |
| EIC     | Negative | 417.2053 | 4.76 | unknown | 29073   | 0       | 0       | 302992   | 25025    | 29909   | 0       | 295588   | 410120   | 0       | 85424    | 239658  | 550192   | 379771   | 155829   | 119286   | 858088   | 738767   | 122300   |
| EIC     | Negative | 345.2103 | 2.19 | unknown | 0       | 21326   | 0       | 0        | 0        | 1047406 | 0       | 134626   | 0        | 352308  | 0        | 0       | 30112    | 0        | 1017276  | 60762    | 0        | 0        | 2067407  |
| EIC     | Negative | 427.1798 | 2.75 | unknown | 81114   | 366115  | 0       | 111010   | 179080   | 209037  | 355434  | 0        | 191820   | 506174  | 464988   | 554464  | 586342   | 399239   | 404158   | 369762   | 417050   | 869134   | 450904   |
| EIC     | Negative | 539.3045 | 3.73 | unknown | 0       | 0       | 0       | 0        | 0        | 61767   | 0       | 0        | 0        | 0       | 0        | 117442  | 0        | 0        | 169187   | 0        | 0        | 0        | 111110   |
| fpHILIC | Negative | 185.0277 | 0.47 | unknown | 160864  | 234250  | 129845  | 107249   | 234184   | 527284  | 493347  | 70603    | 360960   | 68645   | 0        | 254130  | 1100454  | 223801   | 139907   | 533730   | 3025044  | 205418   | 716879   |
| fpHILIC | Positive | 399.2507 | 0.40 | unknown | 213800  | 162517  | 269662  | 507152   | 454615   | 283301  | 432553  | 1751394  | 625944   | 329717  | 3240050  | 1262312 | 547583   | 313482   | 675568   | 510372   | 635166   | 3064443  | 5034909  |
| EIC     | Negative | 555.3913 | 6.54 | unknown | 520736  | 287894  | 241037  | 566993   | 526892   | 485878  | 404606  | 661993   | 501661   | 508373  | 871877   | 402879  | 853781   | 979515   | 958410   | 1507106  | 901536   | 2212869  | 1653183  |
| EIC     | Negative | 493.2447 | 1.92 | unknown | 0       | 354461  | 0       | 0        | 26035    | 68672   | 448509  | 0        | 51932    | 0       | 433372   | 93432   | 197996   | 203823   | 112142   | 420685   | 640322   | 0        | 500347   |
| EIC     | Negative | 619.3459 | 2.48 | unknown | 0       | 68543   | 0       | 0        | 0        | 41657   | 102240  | 76059    | 38092    | 0       | 121596   | 0       | 0        | 49328    | 35223    | 20586    |          |          |          |

|         |          |          |      |         |          |          |         |         |          |          |         |         |         |         |         |          |          |         |         |          |          |          |         |
|---------|----------|----------|------|---------|----------|----------|---------|---------|----------|----------|---------|---------|---------|---------|---------|----------|----------|---------|---------|----------|----------|----------|---------|
| EIC     | Negative | 299.2530 | 5.44 | unknown | 0        | 0        | 0       | 0       | 0        | 0        | 1829173 | 0       | 0       | 1201852 | 1094773 | 0        | 1364912  | 0       | 1497038 | 2157756  | 1293294  | 0        | 1678463 |
| EIC     | Negative | 258.1796 | 3.76 | unknown | 177004   | 2432171  | 24120   | 22057   | 1921761  | 2332915  | 91198   | 60841   | 30454   | 18324   | 68646   | 1628712  | 136645   | 31500   | 252467  | 3987210  | 93085    | 8260824  | 3562147 |
| EIC     | Negative | 257.1760 | 3.76 | unknown | 1090033  | 15737708 | 216034  | 208610  | 12326718 | 14561214 | 567910  | 371698  | 200612  | 176590  | 384553  | 10539708 | 893686   | 154909  | 1620743 | 25622957 | 579450   | 52825975 | 2230225 |
| fpHILIC | Positive | 148.0965 | 3.19 | unknown | 770835   | 890873   | 469792  | 543174  | 778773   | 977879   | 876010  | 477466  | 1466531 | 1826204 | 3737082 | 5642697  | 2091261  | 376540  | 1303127 | 6128623  | 655697   | 6670909  | 2242626 |
| EIC     | Negative | 259.1813 | 3.76 | unknown | 18722    | 293808   | 0       | 0       | 234455   | 274221   | 0       | 0       | 0       | 0       | 0       | 188871   | 0        | 0       | 33608   | 504548   | 0        | 973287   | 413847  |
| fpHILIC | Negative | 530.2781 | 0.61 | unknown | 569098   | 48133    | 1382275 | 904635  | 35947    | 34120    | 43802   | 2821245 | 83971   | 1001463 | 43879   | 0        | 0        | 251343  | 102395  | 95070    | 0        | 11527478 | 0       |
| EIC     | Negative | 410.2636 | 1.10 | unknown | 19967    | 13447    | 27377   | 5776    | 47815    | 35420    | 20231   | 14796   | 31231   | 57613   | 67261   | 54101    | 30013    | 101682  | 102467  | 70484    | 130544   | 145704   | 163910  |
| EIC     | Negative | 409.2607 | 1.10 | unknown | 65855    | 50615    | 85074   | 30620   | 179913   | 125003   | 69533   | 70191   | 123972  | 187169  | 242284  | 193849   | 116966   | 385808  | 419791  | 220356   | 510054   | 609583   | 648323  |
| EIC     | Negative | 532.2819 | 1.96 | unknown | 0        | 0        | 0       | 0       | 0        | 0        | 0       | 0       | 83539   | 0       | 55194   | 47071    | 81703    | 211329  | 126955  | 78236    | 90614    | 0        | 70760   |
| EIC     | Negative | 582.2815 | 1.99 | unknown | 0        | 0        | 0       | 0       | 0        | 0        | 0       | 54447   | 0       | 0       | 0       | 0        | 72462    | 0       | 121763  | 85741    | 0        | 0        | 63408   |
| EIC     | Negative | 355.2051 | 3.32 | unknown | 0        | 71314    | 0       | 0       | 70928    | 58774    | 0       | 0       | 69571   | 0       | 0       | 0        | 181154   | 63973   | 0       | 144935   | 63349    | 995837   | 0       |
| EIC     | Negative | 573.3794 | 3.76 | unknown | 17980    | 227294   | 0       | 0       | 129628   | 183931   | 0       | 0       | 0       | 0       | 0       | 188775   | 0        | 0       | 513929  | 0        | 1283758  | 255712   |         |
| EIC     | Negative | 639.4646 | 4.76 | unknown | 239053   | 39605    | 0       | 2086575 | 0        | 43315    | 0       | 624644  | 1836961 | 0       | 101258  | 683756   | 3378542  | 1800215 | 192828  | 127448   | 10436623 | 5691403  | 123652  |
| EIC     | Negative | 415.2259 | 2.44 | unknown | 0        | 0        | 0       | 0       | 0        | 0        | 0       | 415211  | 0       | 0       | 0       | 0        | 0        | 0       | 915039  | 0        | 1859408  | 0        | 0       |
| EIC     | Negative | 367.1592 | 2.13 | unknown | 0        | 0        | 0       | 0       | 123552   | 0        | 0       | 8567    | 0       | 0       | 66687   | 0        | 0        | 0       | 35281   | 40214    | 0        | 62311    | 761954  |
| EIC     | Negative | 530.2798 | 1.95 | unknown | 0        | 29014    | 0       | 0       | 57964    | 32308    | 41967   | 311363  | 228980  | 349639  | 426197  | 379608   | 717632   | 2167504 | 1242339 | 713394   | 746387   | 1443527  | 654082  |
| fpHILIC | Negative | 155.0351 | 3.75 | unknown | 463669   | 122772   | 160474  | 168237  | 396588   | 97226    | 205192  | 93318   | 185988  | 815476  | 275763  | 105888   | 135907   | 224310  | 696706  | 152222   | 4426145  | 706458   | 1096642 |
| EIC     | Negative | 464.3097 | 2.14 | unknown | 0        | 0        | 0       | 0       | 60689    | 0        | 0       | 0       | 0       | 0       | 97392   | 0        | 0        | 664461  | 172432  | 0        | 0        | 0        | 279268  |
| EIC     | Negative | 325.2018 | 2.58 | unknown | 296430   | 334395   | 105078  | 281030  | 476931   | 638276   | 287676  | 158902  | 451012  | 232403  | 261095  | 200149   | 215383   | 200832  | 280233  | 15061403 | 193466   | 213009   | 269235  |
| EIC     | Negative | 612.2817 | 1.59 | unknown | 0        | 0        | 0       | 0       | 54507    | 0        | 8483    | 0       | 105883  | 0       | 42066   | 80370    | 45467    | 407459  | 394051  | 459028   | 246312   | 0        | 302423  |
| EIC     | Negative | 532.2813 | 1.26 | unknown | 86105    | 0        | 228548  | 112726  | 0        | 0        | 0       | 455878  | 16666   | 349731  | 0       | 0        | 0        | 0       | 0       | 0        | 0        | 4280321  | 0       |
| EIC     | Negative | 345.2105 | 2.51 | unknown | 0        | 0        | 0       | 0       | 18635    | 0        | 31306   | 0       | 75755   | 0       | 0       | 192356   | 0        | 0       | 689198  | 0        | 0        | 0        | 450340  |
| EIC     | Negative | 455.2407 | 2.34 | unknown | 0        | 0        | 0       | 0       | 0        | 8701     | 33080   | 0       | 0       | 45477   | 178907  | 19658    | 0        | 194168  | 8892    | 0        | 14211    | 373016   | 0       |
| EIC     | Negative | 321.2340 | 6.21 | unknown | 0        | 0        | 0       | 0       | 0        | 0        | 0       | 0       | 151112  | 0       | 0       | 0        | 0        | 0       | 442248  | 0        | 595967   | 0        | 464245  |
| EIC     | Negative | 613.2883 | 1.59 | unknown | 0        | 0        | 0       | 0       | 10614    | 0        | 0       | 0       | 26178   | 0       | 0       | 9403     | 10200    | 122759  | 130514  | 157622   | 82215    | 0        | 92591   |
| fpHILIC | Positive | 101.0600 | 3.56 | unknown | 36658    | 0        | 157025  | 36528   | 91680    | 95688    | 62801   | 0       | 0       | 972154  | 454745  | 635665   | 411123   | 0       | 554628  | 462163   | 402688   | 1519414  | 874135  |
| EIC     | Negative | 531.2847 | 1.95 | unknown | 0        | 30833    | 0       | 0       | 0        | 0        | 0       | 0       | 56626   | 0       | 198068  | 132738   | 222632   | 656806  | 427538  | 246638   | 268985   | 0        | 219656  |
| EIC     | Negative | 486.1887 | 0.73 | unknown | 0        | 0        | 0       | 0       | 0        | 5099     | 0       | 0       | 0       | 67360   | 127777  | 168378   | 126806   | 97411   | 35204   | 107539   | 155735   | 97115    | 59832   |
| EIC     | Negative | 337.2297 | 2.15 | unknown | 1293341  | 0        | 1142007 | 1330533 | 0        | 0        | 0       | 0       | 0       | 0       | 0       | 0        | 0        | 0       | 0       | 0        | 0        | 0        | 0       |
| EIC     | Negative | 577.3347 | 3.65 | unknown | 12547811 | 14623181 | 8661424 | 0       | 0        | 0        | 0       | 0       | 0       | 0       | 0       | 0        | 12454176 | 0       | 0       | 0        | 0        | 0        | 0       |
| EIC     | Negative | 636.4365 | 4.28 | unknown | 174510   | 0        | 280580  | 113906  | 0        | 0        | 0       | 0       | 0       | 273489  | 47633   | 0        | 39551    | 0       | 0       | 0        | 0        | 0        | 0       |
| EIC     | Negative | 531.3323 | 4.13 | unknown | 220405   | 0        | 139615  | 43813   | 0        | 0        | 0       | 0       | 0       | 72234   | 0       | 0        | 0        | 0       | 0       | 0        | 0        | 0        | 0       |
| EIC     | Negative | 507.3280 | 2.44 | unknown | 528136   | 273202   | 53447   | 0       | 0        | 0        | 0       | 0       | 0       | 0       | 248226  | 0        | 0        | 0       | 0       | 0        | 0        | 0        | 0       |
| EIC     | Negative | 499.2853 | 1.98 | unknown | 0        | 2923784  | 0       | 0       | 0        | 0        | 0       | 0       | 0       | 0       | 0       | 0        | 8953628  | 0       | 0       | 0        | 0        | 0        | 0       |
| EIC     | Negative | 416.2011 | 5.67 | unknown | 0        | 100262   | 0       | 0       | 0        | 0        | 0       | 0       | 0       | 0       | 0       | 110472   | 0        | 0       | 0       | 0        | 0        | 0        | 0       |
| EIC     | Negative | 430.3048 | 5.65 | unknown | 0        | 498303   | 341950  | 0       | 0        | 0        | 0       | 0       | 0       | 0       | 493104  | 0        | 0        | 0       | 0       | 0        | 0        | 0        | 0       |
| EIC     | Negative | 597.3053 | 1.50 | unknown | 0        | 55901    | 0       | 0       | 0        | 0        | 0       | 0       | 0       | 0       | 430756  | 285714   | 1652890  | 1169784 | 0       | 0        | 0        | 0        | 0       |
| EIC     | Negative | 280.2002 | 3.65 | unknown | 0        | 0        | 0       | 1063057 | 0        | 0        | 0       | 0       | 0       | 0       | 0       | 0        | 1131901  | 851993  | 0       | 0        | 0        | 0        | 0       |
| EIC     | Negative | 412.2786 | 4.04 | unknown | 0        | 0        | 0       | 410406  | 0        | 0        | 0       | 0       | 0       | 535430  | 646822  | 541877   | 0        | 0       | 0       | 0        | 0        | 0        | 0       |
| EIC     | Negative | 251.1322 | 2.40 | unknown | 141766   | 81572    | 0       | 0       | 0        | 0        | 0       | 0       | 0       | 0       | 0       | 0        | 0        | 0       | 0       | 79134    | 0        | 0        | 0       |
| EIC     | Negative | 426.1848 | 0.69 | unknown | 93945    | 0        | 0       | 0       | 0        | 0        | 0       | 0       | 0       | 0       | 0       | 0        | 0        | 80523   | 0       | 0        | 0        | 0        | 92117   |
| EIC     | Negative | 359.2205 | 6.10 | unknown | 98531    | 0        | 180400  | 33248   | 0        | 0        | 0       | 0       | 0       | 298552  | 26729   | 19639    | 0        | 0       | 0       | 0        | 29839    | 65270    |         |
| EIC     | Negative | 313.1547 | 2.22 | unknown | 0        | 0        | 0       | 0       | 0        | 0        | 0       | 0       | 0       | 348664  | 0       | 487043   | 0        | 257762  | 102434  | 0        | 0        | 0        | 0       |
| EIC     | Negative | 280.2001 | 3.79 | unknown | 0        | 0        | 0       | 231836  | 0        | 0        | 0       | 0       | 0       | 0       | 0       | 116630   | 82300    | 0       | 0       | 0        | 147196   | 0        | 0       |
| EIC     | Negative | 357.1702 | 5.65 | unknown | 0        | 0        | 0       | 0       | 0        | 0        | 0       | 0       | 0       | 121401  | 0       | 135701   | 0        | 0       | 0       | 168920   | 0        | 0        | 0       |
| EIC     | Negative | 634.4106 | 3.76 | unknown | 0        | 0        | 818605  | 481990  | 0        | 0        | 0       | 0       | 0       | 0       | 128457  | 0        | 0        | 130783  | 0       | 125443   | 0        | 45966    | 0       |
| EIC     | Negative | 460.1901 | 3.92 | unknown | 190950   | 55118    | 119550  | 411150  | 0        | 0        | 0       | 0       | 0       | 325603  | 88266   | 0        | 0        | 0       | 19912   | 84883    | 0        | 72418    | 0       |
| EIC     | Negative | 293.1019 | 2.56 | unknown | 0        | 0        | 0       | 0       | 0        | 0        | 0       | 0       | 0       | 0       | 0       | 115332   | 120565   | 0       | 98534   | 90853    | 0        | 0        | 0       |
| EIC     | Negative | 357.1675 | 5.65 | unknown | 0        | 169021   | 109221  | 0       | 0        | 0        | 0       | 0       | 0       | 0       | 0       | 0        | 0        | 0       | 0       | 0        | 0        | 193897   | 0       |
| EIC     | Negative | 488.2276 | 2.70 | unknown | 0        | 0        | 0       | 0       | 0        | 0        | 0       | 0       | 0       | 0       | 97698   | 0        | 99205    | 0       | 0       | 95039    | 0        | 0        | 114531  |
| EIC     | Negative | 371.1814 | 2.44 | unknown | 210914   | 42984    | 214285  | 154035  | 0        | 0        | 0       | 0       | 0       | 400930  | 13656   | 0        | 8696     | 91595   | 0       | 57048    | 76653    | 0        | 81952   |
| EIC     | Negative | 299.1877 | 5.23 | unknown | 0        | 0        | 0       | 0       | 0        | 0        | 0       | 0       | 0       | 288179  | 0       | 150968   | 180380   | 0       | 22521   | 115287   | 0        | 93541    | 0       |
| EIC     | Negative | 401.2309 | 3.36 | unknown | 0        | 0        | 257595  | 207248  | 0        | 0        | 0       | 0       | 0       | 0       | 222478  | 170154   | 0        | 0       | 0       | 0        | 0        | 0        | 240498  |
| EIC     | Negative | 396.1867 | 0.71 | unknown | 0        | 159929   | 183609  | 0       | 0        | 0        | 0       | 0       | 0       | 149225  | 160392  | 140434   | 0        | 146930  | 0       | 0        | 103317   | 0        | 161099  |
| EIC     | Negative | 345.1558 | 5.58 | unknown | 0        | 0        | 0       | 0       | 0        | 0        | 0       | 0       | 0       | 0       | 0       | 532095   | 0        | 213748  | 0       | 0        | 0        | 0        | 283129  |
| EIC     | Negative | 268.1926 | 3.44 | unknown | 316578   | 0        | 0       | 0       | 0        | 0        | 0       | 0       | 0       | 0       | 0       | 0        | 0        | 0       | 103847  | 200833   | 0        | 0        | 0       |
| EIC     | Negative | 422.2188 | 3.11 | unknown | 138494   | 0        | 694971  | 200376  | 0        | 0        | 0       | 0       | 0       | 0       | 0       | 0        | 0        | 0       | 0       | 0        | 264055   | 60987    | 0       |
| EIC     | Negative | 395.1842 | 6.09 | unknown | 281411   | 0        | 557227  | 196428  | 0        | 0        | 0       | 0       | 0       | 745879  | 0       | 124376   | 0        | 0       | 0       | 94977    | 116426   | 0        | 117678  |
| EIC     | Negative | 345.1559 | 3.76 | unknown | 0        | 0        | 0       | 0       | 0        | 0        | 0       | 0       | 0       | 0       | 0       | 486823   | 490381   | 232229  | 0       | 0        | 0        | 0        | 343778  |
| EIC     | Negative | 320.2313 | 3.36 | unknown | 0        | 0        | 0       | 307126  | 0        | 0        | 0       | 0       | 0       | 705222  | 0       | 0        | 154431   | 0       | 160049  | 0        | 0        | 0        | 188440  |
| EIC     | Negative | 451.1650 | 3.14 | unknown | 0        | 77280    | 0       | 0       | 0        | 0        | 0       | 0       | 0       | 0       | 0       | 13951    | 107611   | 0       | 0       | 0        | 0        | 141256   | 227359  |
| EIC     | Negative | 329.2390 | 3.80 | unknown | 0        | 0        | 595889  | 429457  | 0        | 0        | 0       | 0       | 0       | 0       | 0       | 0        | 0        | 163334  | 214375  | 0        | 0        | 0        | 0       |
| EIC     | Negative | 251.1322 | 2.56 | unknown | 1321653  | 609978   | 0       | 158672  | 0        | 0        | 0       | 0       | 0       | 44256   | 0       | 0        | 450442   | 0       | 0       |          |          |          |         |



|         |          |          |      |         |           |           |           |           |          |          |           |           |           |          |         |         |         |          |          |         |         |          |          |       |
|---------|----------|----------|------|---------|-----------|-----------|-----------|-----------|----------|----------|-----------|-----------|-----------|----------|---------|---------|---------|----------|----------|---------|---------|----------|----------|-------|
| EIC     | Negative | 452.3106 | 3.22 | unknown | 511707    | 32858     | 412860    | 255059    | 34993    | 82955    | 50245     | 202706    | 10596     | 139273   | 0       | 0       | 0       | 0        | 0        | 0       | 0       | 17275    | 0        |       |
| EIC     | Negative | 452.3115 | 3.85 | unknown | 12500025  | 2288886   | 12071434  | 9023591   | 3761123  | 2913166  | 4059911   | 8337524   | 988900    | 4220950  | 62995   | 150691  | 119280  | 0        | 0        | 0       | 0       | 0        | 876856   | 38218 |
| EIC     | Negative | 390.2735 | 3.20 | unknown | 1331477   | 107528    | 1718424   | 848651    | 216802   | 114989   | 280540    | 737630    | 0         | 224722   | 8105    | 0       | 0       | 0        | 0        | 0       | 0       | 41088    | 24092    |       |
| EIC     | Negative | 505.2573 | 2.13 | unknown | 4517902   | 1363523   | 4957453   | 3025177   | 2108840  | 2262132  | 3279751   | 4969178   | 1736904   | 621617   | 34920   | 37477   | 107804  | 0        | 27326    | 116602  | 8183    | 452754   | 63237    |       |
| EIC     | Negative | 449.2907 | 3.00 | unknown | 3728261   | 111259    | 8828782   | 2801637   | 258695   | 346692   | 351927    | 2079708   | 0         | 0        | 0       | 0       | 0       | 0        | 0        | 0       | 0       | 0        | 143990   |       |
| fpHILIC | Negative | 189.0117 | 0.43 | unknown | 2317818   | 1062387   | 2584827   | 1095841   | 367495   | 152526   | 1473387   | 1982785   | 1164991   | 0        | 0       | 0       | 0       | 89892    | 79930    | 73205   | 0       | 0        | 88366    |       |
| EIC     | Negative | 394.2957 | 3.85 | unknown | 825451    | 158964    | 821490    | 619122    | 232991   | 215941   | 322793    | 600481    | 87635     | 302465   | 0       | 46725   | 0       | 0        | 0        | 0       | 0       | 42944    | 25429    |       |
| EIC     | Negative | 633.4763 | 3.86 | unknown | 378403    | 18975     | 616282    | 1955681   | 284501   | 107275   | 301982    | 813646    | 179298    | 262887   | 0       | 0       | 22338   | 0        | 0        | 0       | 0       | 80026    | 0        |       |
| EIC     | Negative | 506.2605 | 2.14 | unknown | 1166052   | 337414    | 1250285   | 844740    | 572227   | 618273   | 850437    | 1393039   | 475055    | 190434   | 0       | 0       | 29298   | 0        | 0        | 32470   | 0       | 144701   | 10073    |       |
| EIC     | Negative | 469.3078 | 2.13 | unknown | 8738159   | 3191672   | 8203709   | 4795084   | 3045323  | 3567016  | 3992949   | 5548080   | 2105167   | 875341   | 85263   | 37026   | 213419  | 11544    | 26756    | 129580  | 19553   | 677115   | 25624    |       |
| EIC     | Negative | 389.2697 | 3.00 | unknown | 1637571   | 0         | 3564997   | 1137765   | 128244   | 140166   | 72768     | 859345    | 41334     | 0        | 0       | 0       | 0       | 0        | 0        | 0       | 0       | 59959    | 0        |       |
| fpHILIC | Negative | 107.0501 | 0.43 | unknown | 2359583   | 1110629   | 2184612   | 856397    | 166960   | 145468   | 1727719   | 2162534   | 1109957   | 0        | 78425   | 49621   | 0       | 68138    | 67138    | 71138   | 0       | 43438    | 0        |       |
| EIC     | Negative | 389.2700 | 3.28 | unknown | 2650544   | 121720    | 2249488   | 908816    | 112136   | 238699   | 243500    | 595523    | 37387     | 137413   | 36238   | 9188    | 32876   | 34040    | 29223    | 0       | 0       | 0        | 30890    |       |
| EIC     | Negative | 468.3050 | 2.13 | unknown | 46385934  | 16879676  | 42053915  | 25044284  | 16426741 | 18480050 | 20803842  | 31047572  | 10948082  | 4743522  | 420796  | 262868  | 841661  | 84846    | 228007   | 678673  | 109447  | 3582029  | 383444   |       |
| EIC     | Negative | 467.3017 | 2.13 | unknown | 161573266 | 57965065  | 148575193 | 87525683  | 56998722 | 63405424 | 72553886  | 106614434 | 38078761  | 16446815 | 1482122 | 956138  | 2992697 | 322190   | 848977   | 2358111 | 423833  | 12262732 | 1383108  |       |
| EIC     | Negative | 407.2806 | 2.13 | unknown | 53859988  | 18767360  | 47326297  | 28157673  | 17835885 | 20455829 | 23424661  | 34817585  | 12275413  | 5408037  | 506948  | 261210  | 934243  | 13357    | 244804   | 773056  | 103504  | 4056079  | 428311   |       |
| EIC     | Negative | 587.4309 | 3.87 | unknown | 730098    | 101839    | 1472740   | 2119626   | 355392   | 156043   | 356114    | 986427    | 156842    | 330569   | 19984   | 0       | 20472   | 0        | 0        | 0       | 0       | 88114    | 15997    |       |
| EIC     | Negative | 391.2858 | 3.22 | unknown | 841356    | 45074     | 886313    | 466602    | 85122    | 97335    | 89101     | 360720    | 33273     | 208776   | 0       | 0       | 0       | 0        | 0        | 0       | 0       | 35216    | 0        |       |
| EIC     | Negative | 408.2841 | 2.13 | unknown | 14258769  | 4874563   | 12205035  | 7391329   | 4772419  | 5345361  | 6089321   | 9202571   | 3196412   | 1392157  | 136289  | 92061   | 224607  | 29250    | 76350    | 219861  | 31571   | 1088124  | 109198   |       |
| EIC     | Negative | 569.3340 | 1.67 | unknown | 15126073  | 3719507   | 12282905  | 6496923   | 3808124  | 2817640  | 6305168   | 6092245   | 1685427   | 562651   | 95030   | 37397   | 146587  | 0        | 28133    | 207857  | 7038    | 790839   | 60452    |       |
| EIC     | Negative | 429.2602 | 3.85 | unknown | 5168500   | 378018    | 4706647   | 2612358   | 735012   | 525094   | 790866    | 2388095   | 186698    | 783789   | 51640   | 55962   | 67852   | 0        | 0        | 0       | 0       | 155827   | 106784   |       |
| EIC     | Negative | 410.2906 | 2.30 | unknown | 302963    | 84248     | 347610    | 154561    | 124737   | 89960    | 48725     | 41831     | 0         | 0        | 0       | 10576   | 0       | 0        | 0        | 0       | 0       | 37019    | 0        |       |
| EIC     | Negative | 390.2737 | 3.61 | unknown | 6382509   | 276667    | 5479240   | 2562767   | 873187   | 419281   | 1061778   | 2383261   | 199815    | 782959   | 72959   | 16271   | 68367   | 0        | 0        | 0       | 0       | 166262   | 131612   |       |
| EIC     | Negative | 425.2917 | 2.30 | unknown | 227793    | 44582     | 277929    | 153481    | 94156    | 70587    | 191408    | 46553     | 53621     | 0        | 0       | 0       | 0       | 0        | 0        | 0       | 0       | 28363    | 0        |       |
| fpHILIC | Negative | 189.0034 | 0.43 | unknown | 10188801  | 5060900   | 10299471  | 5112439   | 1181807  | 574858   | 7292280   | 9677816   | 5084169   | 274396   | 305528  | 376419  | 165271  | 361416   | 463343   | 348948  | 207401  | 73393    | 360598   |       |
| EIC     | Negative | 405.2645 | 2.94 | unknown | 2385080   | 111608    | 1472340   | 190503    | 115784   | 288599   | 241392    | 605046    | 91566     | 33357    | 0       | 14065   | 0       | 0        | 11389    | 8645    | 0       | 20132    | 43472    |       |
| EIC     | Negative | 464.3023 | 1.65 | unknown | 6241626   | 273197    | 16244964  | 2167296   | 582115   | 314935   | 187057    | 17689399  | 708136    | 758081   | 16979   | 0       | 138942  | 71919    | 37468    | 0       | 54010   | 1142047  | 29859    |       |
| EIC     | Negative | 428.2648 | 3.85 | unknown | 3945084   | 278904    | 3465666   | 1956676   | 548774   | 379871   | 856961    | 1772820   | 195710    | 620678   | 63966   | 29953   | 63985   | 0        | 20467    | 0       | 0       | 113315   | 94234    |       |
| EIC     | Negative | 427.2624 | 3.85 | unknown | 14998076  | 1099466   | 13192025  | 6955917   | 2038305  | 1543807  | 2183354   | 6842139   | 561495    | 2363138  | 229840  | 133541  | 202749  | 0        | 60217    | 76011   | 0       | 437862   | 304125   |       |
| EIC     | Negative | 357.1743 | 2.68 | unknown | 1572825   | 746932    | 1146318   | 749466    | 603536   | 605602   | 801240    | 979839    | 213071    | 0        | 0       | 0       | 0       | 0        | 0        | 0       | 0       | 213828   | 0        |       |
| EIC     | Negative | 389.2697 | 3.61 | unknown | 24042126  | 1123512   | 20780898  | 9782324   | 3146585  | 1650262  | 3967566   | 8889829   | 762984    | 3019598  | 242612  | 40872   | 221646  | 0        | 0        | 109895  | 0       | 617329   | 509802   |       |
| fpHILIC | Negative | 187.0069 | 0.42 | unknown | 245826224 | 124481496 | 231948112 | 119652992 | 21432316 | 16225096 | 177414000 | 244036656 | 123695200 | 4917355  | 5169553 | 6737707 | 5398946 | 10105297 | 11089251 | 8124074 | 5334265 | 4488520  | 10331717 |       |
| EIC     | Negative | 453.3139 | 3.85 | unknown | 2276258   | 422333    | 2128907   | 1590066   | 618683   | 491137   | 733072    | 1512197   | 186683    | 778553   | 42489   | 0       | 0       | 0        | 0        | 0       | 0       | 17294    | 68039    |       |
| EIC     | Negative | 449.2416 | 3.85 | unknown | 670008    | 154315    | 524469    | 607507    | 252180   | 181256   | 224563    | 561197    | 97068     | 310090   | 48564   | 14954   | 15292   | 0        | 0        | 0       | 0       | 69666    | 21470    |       |
| fpHILIC | Negative | 188.0105 | 0.43 | unknown | 18924908  | 9386558   | 16923106  | 8388057   | 1453195  | 1430539  | 12819858  | 17217400  | 8911777   | 321153   | 491645  | 406920  | 678208  | 656664   | 684274   | 382148  | 396945  | 777022   | 0        |       |
| EIC     | Negative | 360.1931 | 3.02 | unknown | 13333759  | 6250074   | 13579536  | 6409525   | 5921184  | 4719570  | 7157975   | 10003009  | 2041855   | 104081   | 47463   | 56014   | 105696  | 40447    | 40402    | 53858   | 0       | 15290    | 2021295  |       |
| EIC     | Negative | 359.1901 | 3.02 | unknown | 64168303  | 29916887  | 64516997  | 30791673  | 28174638 | 22673059 | 34148850  | 47791510  | 9634197   | 482435   | 165989  | 192022  | 442292  | 192007   | 133265   | 114740  | 162222  | 211461   | 9584873  |       |
| EIC     | Negative | 467.2021 | 2.52 | unknown | 14290631  | 930929    | 14836712  | 3507963   | 1202172  | 1493778  | 1232534   | 6249345   | 758729    | 1001445  | 0       | 0       | 163105  | 0        | 0        | 0       | 0       | 625592   | 0        |       |
| EIC     | Negative | 444.2608 | 2.30 | unknown | 3011075   | 384357    | 3008276   | 1262856   | 599853   | 438742   | 437345    | 1992564   | 285026    | 520008   | 32142   | 22936   | 59737   | 0        | 10440    | 0       | 0       | 187621   | 75129    |       |
| EIC     | Negative | 361.1888 | 3.27 | unknown | 3661187   | 0         | 629431    | 394041    | 1292204  | 0        | 2000348   | 1038301   | 100545    | 323384   | 126470  | 0       | 118014  | 259418   | 0        | 0       | 0       | 190908   | 219180   |       |
| EIC     | Negative | 385.1327 | 3.33 | unknown | 231800    | 119607    | 339503    | 310283    | 50128    | 64653    | 77101     | 180961    | 75353     | 0        | 0       | 0       | 0       | 0        | 0        | 0       | 0       | 0        | 34215    |       |
| EIC     | Negative | 361.1891 | 3.02 | unknown | 4109345   | 1913386   | 4328612   | 2052387   | 1785370  | 1492459  | 2192094   | 3122757   | 617235    | 84542    | 0       | 13509   | 37048   | 30842    | 47765    | 9642    | 30341   | 22002    | 598689   |       |
| EIC     | Negative | 445.2547 | 2.30 | unknown | 3856037   | 452995    | 3963417   | 1650179   | 795088   | 564674   | 578181    | 2618639   | 383419    | 686740   | 41186   | 26331   | 0       | 0        | 0        | 0       | 0       | 291354   | 93486    |       |
| EIC     | Negative | 443.2570 | 2.30 | unknown | 10793837  | 1368687   | 11314085  | 4733263   | 2256162  | 1592265  | 1745368   | 7455653   | 1116876   | 1831052  | 87896   | 73336   | 242191  | 27097    | 45527    | 49753   | 20244   | 757610   | 233387   |       |
| EIC     | Negative | 478.3183 | 2.36 | unknown | 1301318   | 30763     | 3095141   | 85400     | 57288    | 61670    | 55183     | 2447401   | 119036    | 236410   | 0       | 12045   | 0       | 0        | 0        | 0       | 0       | 222429   | 0        |       |
| EIC     | Negative | 359.1905 | 2.78 | unknown | 8661351   | 0         | 11551195  | 3702420   | 4852799  | 3811523  | 5161948   | 4217135   | 1413923   | 0        | 0       | 0       | 0       | 0        | 0        | 0       | 0       | 1683709  | 0        |       |
| EIC     | Negative | 360.1936 | 2.79 | unknown | 1865485   | 992451    | 2298942   | 844367    | 896776   | 772293   | 992331    | 886192    | 264225    | 0        | 0       | 0       | 0       | 0        | 0        | 0       | 0       | 0        | 34437    |       |
| EIC     | Negative | 427.2626 | 3.05 | unknown | 812763    | 83091     | 893260    | 500831    | 87721    | 67412    | 99192     | 265597    | 0         | 274607   | 0       | 0       | 0       | 0        | 0        | 0       | 0       | 37381    | 8760     |       |
| EIC     | Negative | 453.3131 | 3.05 | unknown | 436415    | 44415     | 509256    | 280050    | 73326    | 38143    | 72510     | 154820    | 10955     | 143377   | 0       | 0       | 0       | 0        | 0        | 0       | 0       | 31466    | 0        |       |
| EIC     | Negative | 452.3111 | 3.05 | unknown | 2375387   | 233071    | 2926857   | 1588443   | 293338   | 183100   | 392321    | 927234    | 130650    | 823033   | 39912   | 0       | 7748    | 0        | 0        | 0       | 0       | 127165   | 46315    |       |
| EIC     | Negative | 392.2891 | 3.85 | unknown | 47216682  | 8424179   | 44185560  | 33078257  | 13711111 | 10605208 | 14604074  | 32284433  | 4222137   | 15844051 | 1558705 | 915829  | 1366051 | 50336    | 253144   | 495213  | 215638  | 3543068  | 2373898  |       |
| EIC     | Negative | 393.2925 | 3.85 | unknown | 7671077   | 1287537   | 7003386   | 5078497   | 2237718  | 1679359  | 2287313   | 5184662   | 653230    | 2467640  | 253652  | 154234  | 198463  | 0        | 48482    | 66627   | 17465   | 616981   | 379501   |       |
| EIC     | Negative | 393.2921 | 3.05 | unknown | 8         |           |           |           |          |          |           |           |           |          |         |         |         |          |          |         |         |          |          |       |

|         |          |          |      |         |           |         |           |           |         |          |         |          |         |          |         |         |         |         |         |         |         |          |         |
|---------|----------|----------|------|---------|-----------|---------|-----------|-----------|---------|----------|---------|----------|---------|----------|---------|---------|---------|---------|---------|---------|---------|----------|---------|
| EIC     | Negative | 499.2933 | 2.78 | unknown | 147629554 | 38694   | 112910139 | 144732587 | 40699   | 88854    | 74338   | 91229074 | 196091  | 29397292 | 57102   | 69820   | 103706  | 152787  | 98364   | 20047   | 69112   | 10830334 | 55997   |
| EIC     | Negative | 634.4336 | 2.31 | unknown | 1356868   | 29852   | 897079    | 529842    | 54078   | 98403    | 54225   | 472724   | 38030   | 132480   | 0       | 0       | 0       | 0       | 0       | 0       | 0       | 86757    | 0       |
| EIC     | Negative | 505.2574 | 2.30 | unknown | 5426199   | 507545  | 7060413   | 4693724   | 1363491 | 951315   | 1099755 | 8160051  | 766879  | 2572212  | 62445   | 74549   | 155472  | 33652   | 29596   | 40310   | 27997   | 1232045  | 172968  |
| EIC     | Negative | 409.2868 | 2.30 | unknown | 2649951   | 543956  | 2862269   | 1578440   | 938048  | 662307   | 667211  | 2120727  | 438460  | 914683   | 56747   | 40091   | 90409   | 11490   | 25150   | 12593   | 7469    | 405792   | 139539  |
| EIC     | Negative | 478.3182 | 1.70 | unknown | 361461    | 107967  | 245227    | 52245     | 114216  | 103991   | 78712   | 332418   | 70638   | 69443    | 0       | 0       | 0       | 0       | 0       | 0       | 0       | 67363    | 25670   |
| EIC     | Negative | 485.2577 | 3.12 | unknown | 466270    | 10773   | 405664    | 308891    | 39810   | 0        | 23662   | 332818   | 0       | 558761   | 0       | 0       | 0       | 0       | 0       | 0       | 0       | 53683    | 0       |
| EIC     | Negative | 506.2599 | 2.29 | unknown | 1554548   | 138724  | 1906043   | 1250131   | 343434  | 266975   | 277944  | 2169404  | 213859  | 726749   | 22812   | 14127   | 45451   | 43400   | 43431   | 0       | 38393   | 325564   | 50766   |
| EIC     | Negative | 446.2576 | 2.15 | unknown | 578650    | 145904  | 681524    | 253363    | 208257  | 213772   | 37495   | 310159   | 63401   | 32040    | 23984   | 32324   | 29461   | 22906   | 15467   | 36676   | 10067   | 43240    | 12171   |
| EIC     | Negative | 500.2912 | 2.83 | unknown | 46306892  | 0       | 35033798  | 45972172  | 0       | 0        | 2680315 | 28742867 | 2513794 | 9542520  | 887883  | 415053  | 0       | 129126  | 214926  | 225196  | 0       | 3403042  | 1046190 |
| EIC     | Negative | 413.1952 | 4.15 | unknown | 113500    | 0       | 823245    | 0         | 283038  | 256218   | 0       | 329213   | 466459  | 0        | 28164   | 0       | 33791   | 0       | 0       | 129408  | 0       | 0        | 0       |
| EIC     | Negative | 473.2884 | 3.85 | unknown | 4528160   | 2263328 | 4024433   | 4324164   | 3338120 | 2838557  | 3327449 | 4286427  | 1625346 | 3646960  | 545328  | 336491  | 464365  | 0       | 112206  | 192321  | 105842  | 1065293  | 847797  |
| EIC     | Negative | 446.2584 | 2.30 | unknown | 902312    | 102865  | 990983    | 392771    | 215693  | 163891   | 163659  | 732537   | 113894  | 211416   | 29483   | 28359   | 45033   | 23161   | 28909   | 31005   | 24148   | 100185   | 36196   |
| EIC     | Negative | 499.2933 | 2.23 | unknown | 6695365   | 521097  | 13884617  | 10627995  | 539972  | 347044   | 300914  | 8484642  | 510053  | 5579617  | 174779  | 62625   | 106513  | 139787  | 129474  | 90631   | 77847   | 1079884  | 272489  |
| fpHILIC | Negative | 172.9913 | 0.47 | unknown | 75228528  | 6266413 | 8492568   | 1410112   | 4105731 | 54134684 | 2855738 | 5140785  | 4616784 | 1490997  | 1070834 | 2680031 | 2907292 | 1518505 | 1222298 | 4685797 | 1600545 | 1766243  | 2259279 |
| EIC     | Negative | 359.1901 | 3.33 | unknown | 8400778   | 3681088 | 10570663  | 2818109   | 2600905 | 2285329  | 2368902 | 3811578  | 729305  | 357292   | 141185  | 133711  | 120082  | 147536  | 74388   | 47986   | 62496   | 199390   | 1585311 |
| EIC     | Negative | 436.3143 | 5.17 | unknown | 2180382   | 149681  | 2065843   | 1000704   | 300566  | 135783   | 199676  | 897603   | 90751   | 760856   | 53567   | 0       | 28920   | 0       | 0       | 0       | 0       | 181415   | 108010  |
| EIC     | Negative | 502.3990 | 5.80 | unknown | 0         | 94892   | 70723     | 759447    | 223435  | 0        | 137713  | 136154   | 326197  | 95905    | 23650   | 101996  | 126879  | 0       | 0       | 0       | 110516  | 38233    | 0       |
| EIC     | Negative | 474.2631 | 2.88 | unknown | 0         | 0       | 0         | 0         | 0       | 0        | 0       | 0        | 0       | 0        | 0       | 0       | 0       | 0       | 48347   | 29766   | 0       | 0        | 0       |
| EIC     | Negative | 319.1535 | 3.13 | unknown | 88882     | 133147  | 51563     | 417124    | 0       | 0        | 363856  | 79450    | 56488   | 29695    | 227237  | 161730  | 0       | 44602   | 0       | 0       | 0       | 36100    | 0       |
| EIC     | Negative | 407.2442 | 1.89 | unknown | 0         | 104422  | 0         | 0         | 33827   | 845313   | 19336   | 0        | 20492   | 0        | 2372924 | 706658  | 21500   | 61373   | 0       | 0       | 84075   | 0        | 0       |
| EIC     | Negative | 376.2939 | 5.17 | unknown | 994644    | 54676   | 861711    | 447254    | 135724  | 58626    | 61648   | 385260   | 0       | 313565   | 30053   | 31048   | 0       | 0       | 0       | 0       | 0       | 79303    | 39268   |
| fpHILIC | Negative | 171.0564 | 0.95 | unknown | 1368533   | 251960  | 981431    | 832684    | 737647  | 879303   | 652596  | 1229190  | 443821  | 0        | 48554   | 128970  | 95401   | 112093  | 282096  | 146244  | 110560  | 43615    | 148111  |
| fpHILIC | Positive | 251.0481 | 0.95 | unknown | 1687993   | 209792  | 1107172   | 1122825   | 775978  | 1007360  | 724184  | 1155601  | 431310  | 0        | 53022   | 741042  | 59940   | 74883   | 300859  | 117044  | 150991  | 50980    | 134763  |
| EIC     | Negative | 507.2612 | 2.30 | unknown | 198962    | 0       | 313854    | 240987    | 81266   | 64512    | 17863   | 358349   | 23341   | 146854   | 23341   | 18150   | 0       | 15819   | 0       | 0       | 0       | 69655    | 0       |
| EIC     | Negative | 389.2696 | 3.12 | unknown | 7642161   | 266298  | 7568494   | 5090620   | 496813  | 373332   | 405644  | 4483526  | 189523  | 9549560  | 228261  | 0       | 181257  | 0       | 0       | 0       | 0       | 962729   | 210662  |
| EIC     | Negative | 449.2899 | 3.12 | unknown | 10040036  | 307819  | 10380785  | 6650140   | 623710  | 423085   | 605000  | 5852950  | 252327  | 12869751 | 322009  | 99675   | 0       | 0       | 0       | 0       | 0       | 1262525  | 288233  |
| EIC     | Negative | 390.2733 | 3.12 | unknown | 2038765   | 87959   | 2044388   | 1351812   | 137661  | 109887   | 124725  | 1511117  | 53504   | 2528086  | 80712   | 31671   | 61407   | 0       | 0       | 0       | 0       | 256069   | 66894   |
| EIC     | Negative | 450.2942 | 3.12 | unknown | 2911634   | 107256  | 3037188   | 1887566   | 194793  | 118417   | 155034  | 1707678  | 73061   | 3798522  | 84406   | 17411   | 69440   | 0       | 0       | 0       | 0       | 367613   | 98320   |
| EIC     | Negative | 375.1848 | 2.77 | unknown | 1693507   | 218730  | 1023196   | 1065422   | 0       | 0        | 1738526 | 0        | 3483853 | 0        | 4103770 | 185389  | 379106  | 0       | 0       | 0       | 0       | 375289   | 0       |
| EIC     | Negative | 480.2782 | 3.61 | unknown | 2768038   | 54835   | 1503176   | 649435    | 53177   | 43840    | 62667   | 1190946  | 52178   | 640077   | 0       | 0       | 0       | 0       | 0       | 0       | 0       | 361129   | 0       |
| EIC     | Negative | 477.2820 | 3.02 | unknown | 356812    | 0       | 275110    | 154853    | 0       | 91056    | 180547  | 24111    | 131825  | 203177   | 0       | 421634  | 307489  | 0       | 0       | 0       | 0       | 94112    | 0       |
| EIC     | Negative | 596.5278 | 6.36 | unknown | 328841    | 279959  | 209205    | 780922    | 289151  | 339928   | 257498  | 132807   | 195859  | 138917   | 136144  | 156640  | 97555   | 0       | 0       | 96004   | 0       | 172145   | 0       |
| EIC     | Negative | 339.2654 | 5.50 | unknown | 0         | 629665  | 1545002   | 1325282   | 681822  | 596983   | 0       | 1009763  | 506936  | 0        | 0       | 0       | 0       | 0       | 0       | 619196  | 0       | 0        | 0       |
| EIC     | Negative | 362.1883 | 3.03 | unknown | 0         | 339524  | 0         | 392115    | 0       | 262698   | 0       | 134918   | 111621  | 0        | 0       | 0       | 0       | 0       | 0       | 0       | 0       | 120263   | 0       |
| EIC     | Negative | 406.2678 | 5.20 | unknown | 435728    | 0       | 0         | 0         | 363485  | 0        | 0       | 411138   | 0       | 0        | 0       | 0       | 0       | 0       | 0       | 0       | 0       | 0        | 98277   |
| EIC     | Negative | 630.3781 | 4.79 | unknown | 639648    | 1018689 | 558227    | 111890    | 0       | 147083   | 792287  | 629321   | 1002253 | 155844   | 807935  | 628749  | 0       | 686068  | 0       | 0       | 627148  | 0        | 0       |
| EIC     | Negative | 462.3162 | 3.06 | unknown | 95456     | 14896   | 341460    | 375792    | 42346   | 406649   | 30957   | 106649   | 20539   | 105750   | 26096   | 7760    | 0       | 0       | 0       | 0       | 0       | 69285    | 0       |
| EIC     | Negative | 472.2765 | 3.12 | unknown | 286645    | 0       | 276925    | 214827    | 14880   | 31707    | 15473   | 190792   | 0       | 0        | 0       | 0       | 0       | 0       | 0       | 0       | 0       | 62280    | 0       |
| EIC     | Negative | 390.2735 | 3.28 | unknown | 715771    | 66014   | 627828    | 243622    | 60055   | 77344    | 84079   | 176438   | 33481   | 52072    | 23470   | 12683   | 30227   | 25376   | 25995   | 17326   | 14134   | 15353    | 35444   |
| EIC     | Negative | 452.3821 | 5.79 | unknown | 51160     | 245979  | 518849    | 2658440   | 958335  | 41234    | 736133  | 524839   | 692610  | 257555   | 94956   | 598124  | 244524  | 25543   | 0       | 50429   | 243300  | 394046   | 78220   |
| fpHILIC | Positive | 166.0718 | 2.68 | unknown | 126575    | 400910  | 432213    | 600592    | 395985  | 386184   | 367049  | 456886   | 334369  | 210727   | 252942  | 523694  | 356747  | 224614  | 210403  | 62133   | 149690  | 0        | 72760   |
| EIC     | Negative | 448.3512 | 4.91 | unknown | 16814     | 15779   | 114494    | 675857    | 150361  | 0        | 101956  | 126784   | 159853  | 60552    | 0       | 79768   | 52538   | 0       | 0       | 14490   | 17137   | 108935   | 0       |
| EIC     | Negative | 333.2074 | 6.06 | unknown | 0         | 0       | 4958356   | 7641276   | 4458263 | 2433231  | 3786455 | 4673007  | 0       | 3397865  | 2359798 | 2923676 | 3626416 | 182485  | 1916841 | 0       | 140040  | 0        | 2056184 |
| EIC     | Negative | 553.4480 | 5.81 | unknown | 169720    | 324955  | 390350    | 935760    | 493827  | 323252   | 708730  | 409082   | 376637  | 227424   | 194327  | 204151  | 223078  | 125466  | 87115   | 68750   | 243270  | 140225   | 81925   |
| EIC     | Negative | 381.1717 | 3.35 | unknown | 473104    | 200123  | 597460    | 188127    | 149110  | 129140   | 132074  | 236095   | 66220   | 0        | 0       | 15947   | 17200   | 10723   | 12555   | 26722   | 24959   | 23053    | 107076  |
| EIC     | Negative | 481.2810 | 3.61 | unknown | 847588    | 11657   | 482894    | 204628    | 15558   | 0        | 22099   | 356733   | 14062   | 193901   | 0       | 0       | 0       | 0       | 0       | 0       | 0       | 111944   | 0       |
| EIC     | Negative | 446.2576 | 2.19 | unknown | 499299    | 36024   | 636761    | 170125    | 51486   | 41994    | 41765   | 340904   | 46044   | 48340    | 23984   | 32324   | 21154   | 24680   | 16336   | 36676   | 21756   | 43240    | 26624   |
| EIC     | Negative | 524.2948 | 3.29 | unknown | 401502    | 0       | 349012    | 385209    | 41101   | 45791    | 60693   | 303008   | 296008  | 331819   | 43397   | 37547   | 30240   | 346783  | 35067   | 39006   | 47241   | 46088    | 42757   |
| EIC     | Negative | 483.2979 | 3.75 | unknown | 2391076   | 7916    | 2133441   | 175484    | 79911   | 58667    | 58008   | 1270067  | 71439   | 881318   | 28235   | 16887   | 19720   | 0       | 12448   | 12919   | 0       | 372136   | 35505   |
| EIC     | Negative | 471.2731 | 3.12 | unknown | 1065057   | 26473   | 978399    | 727873    | 0       | 0        | 12932   | 703179   | 16431   | 1422058  | 54747   | 8987    | 49669   | 0       | 0       | 0       | 0       | 167024   | 44049   |
| EIC     | Negative | 473.2827 | 3.06 | unknown | 158919    | 238297  | 1857170   | 182630    | 265314  | 180561   | 72829   | 217477   | 72783   | 154572   | 51909   | 0       | 0       | 0       | 0       | 0       | 14573   | 0        | 45864   |
| EIC     | Negative | 482.2943 | 3.76 | unknown | 7987796   | 127091  | 6926436   | 4149599   | 234670  | 174594   | 169493  | 4151586  | 202614  | 2881332  | 86465   | 63090   | 58590   | 45851   | 63716   | 59662   | 49269   | 1196636  | 68546   |
| EIC     | Negative | 365.2463 | 6.39 | unknown | 0         | 7030993 | 19074970  | 14292722  | 0       | 9818884  | 5439546 | 0        | 0       | 9545785  | 7934966 | 0       | 0       | 0       | 0       | 0       | 0       | 0        | 4646216 |
| EIC     | Negative | 500.2289 | 0.71 | unknown | 165060    | 38112   | 69742     | 89829     | 20465   | 123501   | 38919   | 20972    | 21694   | 58505    | 23693   | 18976   | 12937   | 23854   | 0       | 0       | 0       | 20182    | 44549   |
| fpHILIC | Positive |          |      |         |           |         |           |           |         |          |         |          |         |          |         |         |         |         |         |         |         |          |         |

|         |          |          |      |         |          |          |          |          |          |          |          |          |          |          |          |          |          |          |         |          |          |          |          |
|---------|----------|----------|------|---------|----------|----------|----------|----------|----------|----------|----------|----------|----------|----------|----------|----------|----------|----------|---------|----------|----------|----------|----------|
| EIC     | Negative | 269.1576 | 5.06 | unknown | 294481   | 184392   | 224820   | 242858   | 163597   | 293678   | 173268   | 242195   | 109702   | 123127   | 82490    | 0        | 0        | 0        | 32039   | 131579   | 0        | 224480   | 0        |
| EIC     | Negative | 323.2502 | 5.67 | unknown | 0        | 119812   | 163790   | 143779   | 0        | 119787   | 102155   | 114061   | 0        | 93780    | 0        | 0        | 0        | 0        | 0       | 0        | 0        | 136354   | 0        |
| EIC     | Negative | 481.2096 | 1.78 | unknown | 314875   | 23163    | 324253   | 181959   | 64417    | 85513    | 75654    | 362402   | 26331    | 234651   | 49977    | 96113    | 90815    | 105146   | 48628   | 73961    | 0        | 21596    |          |
| EIC     | Negative | 351.1806 | 2.26 | unknown | 587086   | 83895    | 222995   | 112072   | 127279   | 142206   | 174076   | 450506   | 45204    | 285230   | 56821    | 74915    | 52619    | 47578    | 40482   | 54618    | 70248    | 126873   | 95396    |
| EIC     | Negative | 403.3227 | 4.01 | unknown | 961736   | 0        | 507142   | 79321    | 0        | 0        | 0        | 208782   | 0        | 137191   | 0        | 0        | 0        | 0        | 0       | 0        | 0        | 86594    | 0        |
| EIC     | Negative | 341.2698 | 6.42 | unknown | 2007707  | 1940136  | 2802397  | 1777000  | 1286560  | 1085571  | 1023786  | 1380046  | 1433558  | 928944   | 700937   | 879620   | 1104310  | 498865   | 684602  | 455541   | 889608   | 295056   | 258196   |
| EIC     | Negative | 245.1579 | 4.23 | unknown | 118528   | 0        | 0        | 349505   | 66894    | 81345    | 87465    | 96413    | 0        | 156011   | 0        | 0        | 0        | 0        | 0       | 0        | 0        | 141218   | 0        |
| EIC     | Negative | 601.4479 | 5.58 | unknown | 107558   | 166217   | 183483   | 1289648  | 141868   | 94174    | 272788   | 321144   | 398458   | 229834   | 184458   | 103593   | 235314   | 105199   | 145575  | 0        | 236128   | 97439    | 43562    |
| EIC     | Negative | 641.4795 | 6.39 | unknown | 983529   | 1334280  | 1518898  | 2048167  | 1527632  | 1132740  | 1277345  | 1974734  | 923589   | 855694   | 529503   | 534626   | 739967   | 312113   | 404461  | 553276   | 536470   | 821630   | 504688   |
| EIC     | Negative | 239.0672 | 2.98 | unknown | 479189   | 251731   | 106777   | 283082   | 255634   | 247924   | 145228   | 131319   | 377816   | 174528   | 244274   | 110241   | 109086   | 147125   | 112442  | 127577   | 86174    | 81776    | 90159    |
| EIC     | Negative | 469.3308 | 4.91 | unknown | 91055    | 106390   | 252396   | 1558558  | 450487   | 111417   | 295524   | 291988   | 396132   | 172065   | 24616    | 227353   | 167641   | 0        | 14226   | 103148   | 123168   | 385674   | 39974    |
| EIC     | Negative | 342.2016 | 3.13 | unknown | 586305   | 22524    | 426544   | 59958    | 26056    | 0        | 321701   | 0        | 298304   | 298304   | 120706   | 39204    | 96744    | 49804    | 0       | 53262    | 46969    | 0        | 0        |
| EIC     | Negative | 642.4849 | 6.39 | unknown | 449143   | 607669   | 679401   | 1389645  | 673334   | 374703   | 780229   | 780328   | 376707   | 447080   | 300476   | 214865   | 527138   | 117136   | 192466  | 308673   | 266007   | 340317   | 202416   |
| EIC     | Negative | 227.1909 | 5.79 | unknown | 373547   | 591131   | 834332   | 2214817  | 1176627  | 478532   | 1010148  | 909816   | 1009683  | 612248   | 367888   | 904212   | 588950   | 0        | 0       | 489548   | 555464   | 684345   | 290639   |
| EIC     | Negative | 605.4798 | 6.17 | unknown | 1294998  | 2257296  | 2643172  | 6107035  | 2121613  | 1961583  | 2916430  | 2779970  | 2674634  | 1305204  | 1351055  | 1087730  | 1882871  | 1151237  | 1148406 | 718573   | 1686096  | 1208912  | 750997   |
| EIC     | Negative | 469.3283 | 4.91 | unknown | 91055    | 114783   | 264006   | 1558558  | 450209   | 106093   | 303601   | 268449   | 210672   | 155588   | 52705    | 237795   | 192088   | 20916    | 14226   | 102236   | 145448   | 291001   | 51093    |
| EIC     | Negative | 471.2729 | 3.44 | unknown | 228290   | 39876    | 230152   | 216307   | 65953    | 61113    | 91393    | 117175   | 32605    | 104430   | 25535    | 63569    | 69814    | 0        | 0       | 49310    | 114613   | 0        | 0        |
| EIC     | Negative | 226.1891 | 5.94 | unknown | 142248   | 249910   | 474285   | 1504952  | 622940   | 254387   | 465540   | 438375   | 579200   | 164850   | 185256   | 479659   | 295518   | 95866    | 65339   | 215164   | 272024   | 395869   | 128882   |
| EIC     | Negative | 298.2469 | 6.42 | unknown | 1700483  | 1071276  | 1828017  | 5094482  | 1449870  | 1080719  | 1410817  | 2353891  | 2382319  | 727077   | 1011734  | 1512688  | 1101617  | 342882   | 301860  | 1180671  | 721217   | 1390663  | 463828   |
| EIC     | Negative | 482.2797 | 3.60 | unknown | 259124   | 24258    | 159611   | 78848    | 11915    | 14243    | 13841    | 117595   | 0        | 12015    | 9114     | 20931    | 21937    | 9391     | 10196   | 9575     | 43401    | 0        | 0        |
| EIC     | Negative | 226.1891 | 5.79 | unknown | 3059192  | 5075105  | 7488186  | 19783076 | 10555207 | 4543795  | 9300046  | 7475911  | 9065627  | 5249470  | 2957636  | 8224434  | 5160415  | 1596821  | 1467054 | 3978999  | 4619154  | 6470186  | 2481009  |
| fpHILIC | Positive | 345.1765 | 2.25 | unknown | 3549333  | 1463595  | 2844755  | 4001458  | 2090220  | 2429479  | 2204358  | 2943961  | 2648146  | 2338248  | 1428711  | 1684702  | 1940109  | 758111   | 797062  | 1207575  | 963343   | 2157793  | 489617   |
| EIC     | Negative | 225.1857 | 5.79 | unknown | 12054969 | 19949845 | 30048293 | 80136298 | 42479812 | 18074450 | 36654392 | 30994634 | 35674628 | 21096274 | 12106214 | 32902549 | 20539649 | 6463513  | 5783072 | 15837768 | 18354927 | 25893450 | 9854883  |
| EIC     | Negative | 354.0363 | 2.09 | unknown | 261539   | 311787   | 110778   | 57761    | 229400   | 212345   | 182890   | 163911   | 163911   | 82110    | 169111   | 16059    | 85440    | 117370   | 137258  | 159726   | 37002    | 0        | 107467   |
| EIC     | Negative | 551.3218 | 2.65 | unknown | 339971   | 193515   | 126683   | 49634    | 157269   | 186492   | 133626   | 248028   | 43214    | 68993    | 85185    | 81660    | 96222    | 0        | 83353   | 83880    | 86937    | 0        | 105868   |
| EIC     | Negative | 225.1875 | 5.94 | unknown | 582398   | 984327   | 1875498  | 6036464  | 2610946  | 12012962 | 1864822  | 1802455  | 2217190  | 1154167  | 648187   | 1957913  | 1135144  | 377372   | 285885  | 872949   | 1064085  | 1706340  | 551097   |
| EIC     | Negative | 225.1759 | 4.91 | unknown | 91849    | 95997    | 171355   | 525718   | 251626   | 102931   | 176851   | 204768   | 239687   | 123669   | 75061    | 165635   | 139980   | 63538    | 21434   | 93583    | 110502   | 204227   | 30102    |
| fpHILIC | Negative | 363.0737 | 3.29 | unknown | 0        | 1882307  | 1528286  | 669310   | 489902   | 1107283  | 278070   | 277061   | 534990   | 127706   | 776005   | 381758   | 344186   | 166711   | 261685  | 871757   | 0        | 135239   | 0        |
| EIC     | Negative | 307.1893 | 5.94 | unknown | 181431   | 279765   | 550711   | 1601777  | 751235   | 298061   | 548732   | 527243   | 681096   | 345517   | 212903   | 589736   | 348861   | 106790   | 87387   | 260564   | 347616   | 479809   | 153245   |
| EIC     | Negative | 606.4823 | 6.17 | unknown | 529997   | 844187   | 1195966  | 2346321  | 871505   | 786578   | 1094893  | 1018512  | 0        | 1585312  | 0        | 0        | 1668956  | 465120   | 258260  | 764726   | 522843   | 299353   | 0        |
| EIC     | Negative | 608.3946 | 5.74 | unknown | 0        | 2638735  | 2498923  | 1875178  | 0        | 3141606  | 2524691  | 2224656  | 0        | 0        | 74298    | 117220   | 0        | 0        | 0       | 101262   | 68144    | 155173   | 30785    |
| EIC     | Negative | 500.3824 | 5.58 | unknown | 0        | 74006    | 120675   | 784881   | 126172   | 0        | 49638    | 174041   | 397097   | 89387    | 22731    | 74298    | 117220   | 0        | 0       | 0        | 0        | 0        | 0        |
| EIC     | Negative | 297.2435 | 6.42 | unknown | 7357680  | 4455338  | 9124433  | 24791343 | 7649814  | 5655634  | 6603349  | 11832435 | 11290473 | 7357959  | 4908749  | 7498601  | 5997666  | 1725214  | 1886025 | 5947397  | 3545082  | 6785110  | 2345326  |
| EIC     | Negative | 503.2994 | 4.64 | unknown | 0        | 1608051  | 0        | 0        | 0        | 1539660  | 0        | 1253375  | 964298   | 1227370  | 1151541  | 1116240  | 0        | 0        | 0       | 0        | 0        | 0        | 1342761  |
| EIC     | Negative | 431.3379 | 3.38 | unknown | 0        | 64556    | 195955   | 1745347  | 216708   | 99298    | 179911   | 197795   | 351662   | 160623   | 69523    | 160553   | 131631   | 25766    | 12372   | 65459    | 84227    | 324134   | 16406    |
| EIC     | Negative | 324.0088 | 1.26 | unknown | 64225    | 50675    | 68490    | 37708    | 47200    | 48934    | 36545    | 62805    | 33836    | 53413    | 21553    | 16914    | 21547    | 28311    | 25944   | 42043    | 17354    | 0        | 25202    |
| fpHILIC | Positive | 346.1796 | 2.25 | unknown | 487044   | 325465   | 734361   | 607928   | 293447   | 619428   | 248214   | 419428   | 432537   | 441066   | 180656   | 387237   | 330270   | 138676   | 223309  | 122972   | 78718    | 354723   | 62011    |
| EIC     | Negative | 361.1844 | 3.00 | unknown | 0        | 1928452  | 4186348  | 1971698  | 0        | 1480467  | 0        | 0        | 0        | 0        | 15750    | 13140    | 12646    | 61285    | 48390   | 0        | 13726    | 600186   | 0        |
| EIC     | Negative | 591.3199 | 1.24 | unknown | 882388   | 30917    | 1882510  | 329701   | 37921    | 141535   | 77075    | 692082   | 65000    | 1807703  | 56141    | 41090    | 65678    | 0        | 114099  | 70119    | 0        | 192437   | 118788   |
| EIC     | Negative | 514.2855 | 0.99 | unknown | 827221   | 25418    | 3973898  | 4134008  | 56880    | 26398    | 0        | 4591785  | 104083   | 2736873  | 128528   | 0        | 0        | 0        | 0       | 0        | 0        | 2279071  | 68781    |
| EIC     | Negative | 434.3364 | 5.44 | unknown | 230035   | 46868    | 451385   | 143310   | 150448   | 56453    | 29893    | 292562   | 38539    | 0        | 149944   | 0        | 35640    | 0        | 0       | 45149    | 199778   | 34573    | 0        |
| fpHILIC | Negative | 175.0246 | 3.29 | unknown | 48492    | 46060900 | 28378534 | 12525967 | 15011176 | 30954256 | 8771110  | 5998194  | 12093366 | 17203260 | 21932962 | 9510860  | 11548569 | 3712577  | 6604527 | 26450484 | 1913005  | 2411713  | 279011   |
| EIC     | Negative | 314.2058 | 3.25 | unknown | 195623   | 60077    | 195075   | 76469    | 99783    | 94270    | 111159   | 243450   | 25127    | 146822   | 55607    | 41583    | 43911    | 38327    | 36670   | 27084    | 38205    | 111376   | 71081    |
| EIC     | Negative | 455.4106 | 6.35 | unknown | 1906962  | 2689038  | 5774895  | 7195745  | 4266803  | 2853962  | 3673893  | 6288514  | 4908992  | 2492294  | 1946622  | 4363194  | 2684664  | 1160619  | 1507694 | 1908808  | 1896643  | 3817885  | 1773212  |
| EIC     | Negative | 360.1934 | 3.65 | unknown | 1598401  | 0        | 1576982  | 1541572  | 0        | 1717048  | 1619934  | 0        | 0        | 0        | 0        | 0        | 0        | 0        | 0       | 0        | 0        | 0        | 1658272  |
| EIC     | Negative | 604.3628 | 4.52 | unknown | 14242704 | 358649   | 13601586 | 14049583 | 13489967 | 13888372 | 14142702 | 0        | 13667018 | 13044895 | 13668725 | 0        | 0        | 13376744 | 0       | 0        | 13534026 | 0        | 13950299 |
| EIC     | Negative | 309.1972 | 5.79 | unknown | 88587    | 103437   | 133735   | 332788   | 189079   | 98631    | 176167   | 146955   | 163426   | 130137   | 0        | 173062   | 99520    | 0        | 23686   | 93899    | 94872    | 112683   | 61633    |
| fpHILIC | Negative | 176.0281 | 3.30 | unknown | 0        | 3411375  | 1817171  | 874954   | 1062814  | 2256599  | 585537   | 421360   | 857391   | 1205877  | 1547080  | 677466   | 820245   | 284790   | 505144  | 1921866  | 0        | 210662   | 0        |
| EIC     | Negative | 450.3313 | 2.87 | unknown | 1808221  | 119067   | 1419863  | 414111   | 282681   | 44507    | 309716   | 2846413  | 272262   | 489340   | 40025    | 91121    | 78694    | 185301   | 145242  | 97371    | 117973   | 1466158  | 91118    |
| EIC     | Negative | 449.3279 | 2.87 | unknown | 6184458  | 443470   | 4700424  | 1306997  | 942393   | 117953   | 1115909  | 9472380  | 963228   | 1806695  | 151452   | 331643   | 232723   | 643531   | 505695  | 364959   | 397634   | 4853612  | 340457   |
| fpHILIC | Negative | 174.0169 | 3.29 | unknown | 0        | 4672963  | 3900302  | 2429738  | 2532200  | 4150892  | 1784201  | 1287474  | 2161281  | 2841997  | 3273373  | 1921075  | 2085565  | 878590   | 1433496 | 3892412  | 0        | 725619</ |          |

|         |          |          |      |         |         |         |         |          |         |         |         |         |         |         |         |         |         |         |         |         |         |         |         |
|---------|----------|----------|------|---------|---------|---------|---------|----------|---------|---------|---------|---------|---------|---------|---------|---------|---------|---------|---------|---------|---------|---------|---------|
| EIC     | Negative | 520.6001 | 0.64 | unknown | 86008   | 33269   | 95186   | 69280    | 83244   | 59156   | 56243   | 23779   | 43235   | 159839  | 10017   | 16728   | 23550   | 124272  | 0       | 24414   | 13996   | 10545   | 97895   |
| EIC     | Negative | 311.1528 | 3.38 | unknown | 72344   | 106987  | 196700  | 437436   | 186102  | 123125  | 164532  | 171939  | 239196  | 139133  | 93677   | 165698  | 135848  | 32907   | 28430   | 126518  | 120588  | 214879  | 0       |
| EIC     | Negative | 417.0284 | 1.26 | unknown | 388790  | 323603  | 442966  | 124434   | 226279  | 234997  | 219615  | 266813  | 151542  | 242964  | 202323  | 29346   | 87272   | 141686  | 124358  | 263582  | 58582   | 11245   | 153728  |
| EIC     | Negative | 311.1659 | 3.21 | unknown | 249487  | 171605  | 177657  | 278056   | 147621  | 291251  | 129986  | 137388  | 65040   | 92881   | 113478  | 35390   | 36543   | 0       | 90735   | 175495  | 25124   | 114406  | 24537   |
| EIC     | Negative | 293.1393 | 2.23 | unknown | 139390  | 33920   | 225938  | 39544    | 59444   | 37111   | 84506   | 224255  | 137336  | 231954  | 177839  | 34365   | 43285   | 24088   | 29266   | 64625   | 45936   | 117876  | 42154   |
| EIC     | Negative | 632.4972 | 6.28 | unknown | 1040073 | 1154995 | 1348077 | 2526985  | 820551  | 923099  | 1188000 | 1404488 | 1337491 | 824257  | 781375  | 443386  | 916016  | 904133  | 761037  | 288081  | 948274  | 794104  | 392187  |
| EIC     | Negative | 420.1383 | 1.06 | unknown | 61587   | 209815  | 82393   | 66170    | 45254   | 32072   | 89117   | 0       | 146024  | 0       | 0       | 0       | 0       | 0       | 0       | 0       | 0       | 0       | 157527  |
| EIC     | Negative | 331.1914 | 4.93 | unknown | 1479546 | 527591  | 1537848 | 1038297  | 804482  | 557573  | 918343  | 1496655 | 353664  | 1133039 | 556737  | 395217  | 422736  | 329631  | 405640  | 0       | 391441  | 1047878 | 485105  |
| EIC     | Negative | 499.0997 | 1.26 | unknown | 300790  | 323412  | 384699  | 88994    | 244446  | 230891  | 127318  | 268846  | 183821  | 208518  | 230900  | 5295    | 101058  | 191860  | 150622  | 254024  | 44493   | 0       | 202868  |
| fpHILIC | Negative | 215.1650 | 0.39 | unknown | 567497  | 869900  | 1586733 | 3955744  | 1504595 | 1021144 | 1235852 | 1678137 | 1799905 | 1219172 | 630080  | 1179907 | 1036495 | 405216  | 226076  | 764388  | 853346  | 1629172 | 619444  |
| EIC     | Negative | 313.2748 | 6.01 | unknown | 230765  | 213765  | 498563  | 562382   | 195997  | 126289  | 176624  | 516771  | 270162  | 136251  | 120278  | 117276  | 160788  | 114638  | 84279   | 122609  | 126539  | 280162  | 116036  |
| EIC     | Negative | 447.3125 | 3.59 | unknown | 335788  | 43344   | 335585  | 82019    | 55766   | 56229   | 39242   | 169528  | 30973   | 50243   | 11093   | 13300   | 10807   | 35787   | 29532   | 30079   | 30784   | 92743   | 16486   |
| EIC     | Negative | 543.4623 | 6.35 | unknown | 331587  | 164926  | 224078  | 1038752  | 163382  | 221719  | 102588  | 241840  | 283632  | 227357  | 205162  | 266616  | 273823  | 0       | 0       | 221137  | 89603   | 212780  | 51579   |
| EIC     | Negative | 323.2594 | 6.37 | unknown | 1285132 | 1201697 | 2744475 | 4563697  | 2162899 | 2288295 | 1614422 | 3068129 | 1559122 | 2143100 | 970869  | 1246558 | 1481866 | 779217  | 545568  | 1390944 | 983322  | 2351353 | 810731  |
| EIC     | Negative | 244.1999 | 3.81 | unknown | 200874  | 153466  | 503479  | 706932   | 321895  | 252833  | 320750  | 601082  | 392593  | 313431  | 193269  | 240687  | 225777  | 210620  | 90502   | 174115  | 199751  | 439601  | 171593  |
| EIC     | Negative | 225.1857 | 6.03 | unknown | 327108  | 683748  | 1057805 | 3575410  | 1455468 | 645773  | 1049499 | 1237269 | 1529307 | 891436  | 483675  | 1068429 | 826506  | 280773  | 186438  | 465316  | 847766  | 1504623 | 384430  |
| EIC     | Negative | 243.1965 | 3.81 | unknown | 1247395 | 1038218 | 3217983 | 4368684  | 2094064 | 1631405 | 2070782 | 3652059 | 2542275 | 2090888 | 1198752 | 1555346 | 1389817 | 1378662 | 581796  | 1086184 | 1317969 | 2869693 | 1032610 |
| fpHILIC | Positive | 344.2790 | 0.61 | unknown | 1171198 | 851492  | 1127631 | 2625706  | 1000009 | 1127631 | 1158348 | 1152769 | 1158348 | 1634202 | 697276  | 1101134 | 997740  | 418776  | 585894  | 656074  | 1150715 | 633640  | 1363640 |
| EIC     | Negative | 381.1597 | 4.91 | unknown | 84402   | 88276   | 149389  | 373144   | 208434  | 79850   | 154944  | 174545  | 216483  | 127962  | 66908   | 153610  | 115067  | 47862   | 27389   | 102852  | 100048  | 191338  | 58051   |
| EIC     | Negative | 294.2157 | 5.46 | unknown | 157020  | 108450  | 184398  | 485042   | 212382  | 121073  | 143006  | 252332  | 342235  | 156774  | 102636  | 120461  | 118779  | 49629   | 61648   | 121951  | 126780  | 231524  | 74641   |
| EIC     | Negative | 342.2372 | 3.62 | unknown | 377817  | 139078  | 441558  | 255611   | 168932  | 226375  | 296789  | 431936  | 88325   | 264956  | 118213  | 172785  | 116528  | 64197   | 108200  | 118058  | 85721   | 271610  | 114325  |
| EIC     | Negative | 631.4953 | 6.28 | unknown | 2266747 | 2401260 | 3218288 | 5892637  | 1754377 | 2143084 | 2785350 | 3327034 | 3063606 | 2040343 | 1923565 | 1063144 | 2082134 | 1952802 | 1834182 | 79130   | 2289777 | 1633821 | 1022300 |
| EIC     | Negative | 325.2021 | 3.36 | unknown | 643010  | 304443  | 689866  | 476506   | 472459  | 465142  | 515333  | 732678  | 150722  | 474376  | 251589  | 278350  | 206747  | 150070  | 204240  | 186619  | 209016  | 461801  | 286380  |
| EIC     | Negative | 307.1892 | 6.03 | unknown | 115819  | 221521  | 359887  | 1035415  | 494825  | 220763  | 343179  | 362037  | 475814  | 313508  | 156604  | 354007  | 320269  | 90489   | 68201   | 166051  | 319721  | 434663  | 105860  |
| EIC     | Negative | 289.2174 | 6.36 | unknown | 864486  | 897071  | 1020271 | 1923639  | 817340  | 1074213 | 949230  | 1492476 | 977414  | 480632  | 584607  | 785649  | 789738  | 422590  | 631119  | 570509  | 591714  | 709073  | 563438  |
| EIC     | Negative | 594.3425 | 2.35 | unknown | 4951037 | 98086   | 3606532 | 3109429  | 1436694 | 3825925 | 1778396 | 3550396 | 2704702 | 486334  | 3013112 | 4866385 | 2599605 | 233418  | 127591  | 4145678 | 124732  | 3087147 | 208279  |
| EIC     | Negative | 283.1450 | 5.79 | unknown | 97058   | 91451   | 138691  | 222827   | 150668  | 59158   | 143280  | 114704  | 161795  | 110632  | 59930   | 151291  | 98065   | 29328   | 21722   | 85400   | 96640   | 113804  | 46858   |
| EIC     | Negative | 363.2295 | 5.83 | unknown | 1866985 | 1889151 | 1811867 | 1971795  | 1507343 | 1863620 | 2452718 | 1723024 | 1656193 | 1484782 | 1835641 | 982559  | 1568588 | 2322689 | 2198221 | 121404  | 1845305 | 0       | 1192347 |
| EIC     | Negative | 272.9448 | 1.21 | unknown | 193902  | 122934  | 156404  | 124025   | 111235  | 35689   | 27890   | 54378   | 21677   | 37537   | 23077   | 22221   | 19167   | 22044   | 30224   | 48693   | 16278   | 35520   | 15372   |
| EIC     | Negative | 297.2075 | 3.74 | unknown | 575825  | 262537  | 568388  | 296255   | 331648  | 427620  | 430960  | 576233  | 230716  | 374183  | 180282  | 308988  | 296466  | 200601  | 191296  | 253769  | 190957  | 400441  | 128095  |
| EIC     | Negative | 510.2478 | 1.12 | unknown | 1433539 | 557438  | 2308064 | 1068154  | 813067  | 945205  | 1476903 | 1629763 | 1021428 | 1829534 | 1195980 | 642184  | 268915  | 648411  | 797991  | 670002  | 764162  | 541228  | 665767  |
| EIC     | Negative | 324.2625 | 6.37 | unknown | 378463  | 258988  | 648807  | 1007696  | 523399  | 351036  | 485900  | 503979  | 513102  | 336710  | 233603  | 353414  | 333542  | 230038  | 162335  | 333954  | 297418  | 363963  | 233497  |
| EIC     | Negative | 377.1807 | 2.55 | unknown | 1552317 | 613353  | 1815120 | 934546   | 304691  | 524814  | 475235  | 645367  | 229066  | 0       | 0       | 0       | 372762  | 0       | 0       | 372762  | 0       | 905526  | 0       |
| EIC     | Negative | 387.2542 | 2.82 | unknown | 298940  | 64802   | 527132  | 78430    | 79145   | 53031   | 83339   | 304994  | 79420   | 158189  | 45494   | 54570   | 35605   | 74879   | 55398   | 29840   | 45816   | 179468  | 42307   |
| EIC     | Negative | 553.2752 | 3.12 | unknown | 236794  | 12143   | 162365  | 33486    | 0       | 0       | 171439  | 26642   | 320758  | 0       | 171439  | 0       | 15441   | 0       | 9751    | 10978   | 0       | 99435   | 16184   |
| fpHILIC | Negative | 170.1266 | 0.43 | unknown | 421982  | 311399  | 508646  | 954395   | 527215  | 305724  | 368654  | 513598  | 647475  | 393689  | 366985  | 511118  | 353526  | 125024  | 192854  | 232921  | 250478  | 465148  | 251065  |
| EIC     | Negative | 479.3374 | 2.97 | unknown | 260476  | 12739   | 230082  | 77763    | 9746    | 12165   | 33332   | 342923  | 0       | 0       | 28603   | 64842   | 0       | 0       | 0       | 0       | 0       | 252424  | 0       |
| EIC     | Negative | 592.2515 | 1.12 | unknown | 117580  | 60196   | 193737  | 93662    | 74617   | 85083   | 131216  | 166348  | 97853   | 173434  | 109143  | 66786   | 36067   | 61530   | 73809   | 63283   | 73460   | 55988   | 62125   |
| EIC     | Negative | 511.3995 | 4.07 | unknown | 14178   | 0       | 55543   | 239400   | 56664   | 31142   | 47760   | 95366   | 95839   | 16343   | 26836   | 43228   | 76945   | 12887   | 0       | 51298   | 19473   | 123896  | 0       |
| EIC     | Negative | 251.1654 | 4.07 | unknown | 190738  | 69498   | 259950  | 157640   | 89506   | 122954  | 109641  | 207146  | 49355   | 219097  | 102325  | 139143  | 133204  | 127870  | 61964   | 39703   | 56687   | 96124   | 91146   |
| EIC     | Negative | 506.6207 | 0.63 | unknown | 119210  | 65056   | 180909  | 93973    | 59421   | 68037   | 55682   | 15615   | 91574   | 0       | 4714    | 91247   | 240485  | 18798   | 0       | 4714    | 19247   | 0       | 17773   |
| EIC     | Negative | 419.1349 | 1.06 | unknown | 259073  | 925806  | 350428  | 275921   | 175547  | 130775  | 357981  | 13795   | 613290  | 0       | 0       | 0       | 5953    | 0       | 0       | 16608   | 5270    | 0       | 751193  |
| EIC     | Negative | 625.2130 | 2.08 | unknown | 317348  | 206166  | 203476  | 0        | 77668   | 130282  | 110046  | 0       | 49212   | 0       | 133687  | 0       | 26419   | 78373   | 77702   | 78691   | 0       | 0       | 64304   |
| EIC     | Negative | 247.1073 | 4.88 | unknown | 197800  | 333338  | 373881  | 1600070  | 501023  | 243856  | 404161  | 568036  | 964062  | 414196  | 510222  | 317977  | 492582  | 113493  | 100235  | 404473  | 406563  | 545878  | 155070  |
| EIC     | Negative | 387.2756 | 5.99 | unknown | 7985182 | 5920876 | 7484828 | 7829693  | 3839232 | 3923599 | 6882420 | 7044663 | 4831627 | 4054505 | 5001692 | 2690674 | 5198639 | 7245136 | 4998504 | 4831627 | 4598628 | 3035076 | 2487410 |
| EIC     | Negative | 625.3606 | 3.15 | unknown | 339778  | 24713   | 356761  | 116467   | 132280  | 47593   | 65134   | 514260  | 70171   | 179284  | 49463   | 12919   | 30743   | 57215   | 73028   | 47219   | 73555   | 256302  | 49817   |
| fpHILIC | Positive | 456.1912 | 2.23 | unknown | 846708  | 371886  | 715911  | 740658   | 475424  | 484590  | 354653  | 486286  | 585438  | 481763  | 399084  | 506116  | 461638  | 303959  | 232695  | 334317  | 276198  | 346757  | 252200  |
| EIC     | Negative | 363.2546 | 5.18 | unknown | 414724  | 168263  | 340770  | 282763   | 252737  | 247938  | 231524  | 336419  | 196410  | 288743  | 154859  | 187480  | 154264  | 104225  | 105835  | 169793  | 109716  | 243399  | 138153  |
| EIC     | Negative | 251.2015 | 6.31 | unknown | 2726161 | 4512901 | 7487843 | 17216134 | 8571413 | 4105383 | 7308736 | 6881233 | 8081847 | 5109964 | 3454262 | 6113883 | 5096427 | 2331677 | 1364307 | 3075162 | 5543635 | 8584028 | 2784392 |
| EIC     | Negative | 607.3820 | 5.01 | unknown | 969810  | 1346007 | 1031631 | 856804   | 0       | 0       | 1168039 | 0       | 0       | 36864   | 0       | 995413  | 0       | 1054327 | 0       | 0       | 0       | 741614  | 0       |
| EIC</   |          |          |      |         |         |         |         |          |         |         |         |         |         |         |         |         |         |         |         |         |         |         |         |

|         |          |          |      |         |          |          |          |           |          |          |          |          |          |          |          |          |          |          |          |          |          |          |          |
|---------|----------|----------|------|---------|----------|----------|----------|-----------|----------|----------|----------|----------|----------|----------|----------|----------|----------|----------|----------|----------|----------|----------|----------|
| EIC     | Negative | 429.2490 | 2.39 | unknown | 1204264  | 430225   | 985908   | 924428    | 663385   | 674529   | 601740   | 1537044  | 167531   | 802583   | 251475   | 272106   | 181409   | 315064   | 273546   | 167390   | 271477   | 1226204  | 363192   |
| EIC     | Negative | 630.3781 | 5.13 | unknown | 756967   | 219134   | 498635   | 0         | 352655   | 0        | 470949   | 480611   | 0        | 0        | 0        | 397603   | 38114    | 111215   | 289683   | 102549   | 44617    | 387794   | 0        |
| EIC     | Negative | 250.1893 | 5.26 | unknown | 249733   | 258967   | 406133   | 1061060   | 403211   | 175744   | 300444   | 495695   | 553244   | 287351   | 149845   | 210838   | 321297   | 104582   | 138377   | 195071   | 285664   | 433319   | 166569   |
| EIC     | Negative | 285.1987 | 3.34 | unknown | 271800   | 0        | 280408   | 229451    | 90050    | 75761    | 91462    | 236104   | 75757    | 432385   | 0        | 93850    | 73397    | 84044    | 67558    | 0        | 73097    | 219432   | 0        |
| EIC     | Negative | 313.2748 | 6.12 | unknown | 86485    | 103450   | 231255   | 271143    | 134209   | 72027    | 130963   | 234058   | 197170   | 128172   | 47340    | 98896    | 133103   | 51635    | 45851    | 107078   | 91615    | 180566   | 49885    |
| EIC     | Negative | 393.3012 | 6.43 | unknown | 4241434  | 3586228  | 5813549  | 4339999   | 3580637  | 1690331  | 3470105  | 5190064  | 3092787  | 3888732  | 1829920  | 1327143  | 1884727  | 1685378  | 2099287  | 2407361  | 2426744  | 1844420  | 1998364  |
| EIC     | Negative | 619.4931 | 6.29 | unknown | 500826   | 726135   | 614394   | 574498    | 648351   | 585096   | 715367   | 698485   | 412654   | 55769    | 402504   | 123664   | 482273   | 502053   | 590266   | 217259   | 477316   | 272497   | 382849   |
| fpHILIC | Positive | 352.2451 | 2.29 | unknown | 3957881  | 468558   | 2196233  | 1327886   | 890147   | 1365189  | 719873   | 1047697  | 163487   | 976742   | 252836   | 362343   | 425953   | 161205   | 793785   | 491909   | 117505   | 1262230  | 0        |
| EIC     | Negative | 293.1398 | 1.77 | unknown | 2241571  | 1487055  | 1659444  | 425941    | 1639058  | 822072   | 1356702  | 1436708  | 631594   | 1950498  | 786782   | 796234   | 594554   | 943498   | 1080391  | 912639   | 460768   | 0        | 1114013  |
| EIC     | Negative | 273.2342 | 4.02 | unknown | 108045   | 95188    | 308756   | 981330    | 230632   | 185277   | 197622   | 548725   | 396435   | 303401   | 162526   | 296751   | 261378   | 99265    | 29020    | 265403   | 171613   | 450329   | 76465    |
| EIC     | Negative | 249.1860 | 5.26 | unknown | 1336391  | 1316500  | 2390404  | 6189870   | 2247785  | 927643   | 1736339  | 2813392  | 3342580  | 1734210  | 924756   | 1274869  | 1835670  | 778291   | 817931   | 1267583  | 1661736  | 2412263  | 913370   |
| EIC     | Negative | 270.1793 | 3.10 | unknown | 318272   | 81285    | 189307   | 129469    | 129095   | 133577   | 160406   | 270316   | 63867    | 149940   | 57820    | 82400    | 65844    | 62285    | 88888    | 83784    | 82042    | 171672   | 58042    |
| EIC     | Negative | 291.1025 | 2.21 | unknown | 151334   | 140154   | 211019   | 163710    | 129322   | 113458   | 147814   | 218725   | 142365   | 121286   | 89544    | 85319    | 68855    | 54403    | 82366    | 84481    | 83356    | 143106   | 88189    |
| EIC     | Negative | 648.3875 | 5.79 | unknown | 196828   | 467403   | 265767   | 243417    | 315702   | 349009   | 261957   | 272508   | 282004   | 99854    | 245822   | 187326   | 185862   | 194331   | 177347   | 189636   | 247045   | 114312   | 222136   |
| EIC     | Negative | 268.2002 | 3.44 | unknown | 348265   | 237687   | 832437   | 809473    | 541625   | 362568   | 410874   | 799898   | 441932   | 505026   | 224271   | 348457   | 337683   | 410784   | 113031   | 233541   | 385945   | 632284   | 276232   |
| EIC     | Negative | 412.2788 | 5.46 | unknown | 1831550  | 1544380  | 1564134  | 2087475   | 1089147  | 1203462  | 1832124  | 1261253  | 1509209  | 1258184  | 1541406  | 666894   | 1103768  | 1578534  | 1770275  | 280555   | 1325990  | 529975   | 530049   |
| EIC     | Negative | 354.2350 | 4.03 | unknown | 73924    | 94497    | 183552   | 468854    | 158481   | 103122   | 135348   | 309008   | 243299   | 184391   | 101248   | 180333   | 149833   | 66713    | 15685    | 155782   | 128510   | 255760   | 55432    |
| EIC     | Negative | 339.1795 | 2.39 | unknown | 34041    | 45144    | 79109    | 54908     | 50179    | 69666    | 55528    | 55304    | 27915    | 31600    | 30039    | 35620    | 39504    | 39799    | 21438    | 38478    | 26901    | 37889    | 0        |
| EIC     | Negative | 333.2049 | 6.06 | unknown | 2634557  | 3205219  | 5194925  | 8199274   | 5165963  | 2630690  | 4134294  | 4939022  | 5493546  | 3700031  | 2655826  | 3042497  | 3745162  | 1951788  | 2096548  | 2473519  | 3151328  | 4475167  | 2211760  |
| EIC     | Negative | 411.2756 | 5.73 | unknown | 1674066  | 1245155  | 1572654  | 5128380   | 363634   | 704618   | 1215179  | 2092323  | 1155311  | 1708559  | 537990   | 1346728  | 1933158  | 1759501  | 0        | 1412605  | 0        | 571344   | 0        |
| fpHILIC | Negative | 402.1010 | 0.97 | unknown | 284018   | 348786   | 558996   | 478689    | 365900   | 195208   | 277380   | 357700   | 273625   | 120335   | 160912   | 134139   | 137002   | 123552   | 142648   | 160255   | 124030   | 414636   | 106814   |
| EIC     | Negative | 279.1590 | 4.28 | unknown | 124002   | 179299   | 185253   | 546884    | 304013   | 190775   | 232306   | 207542   | 321122   | 242445   | 120491   | 206764   | 104361   | 69918    | 157977   | 196334   | 259031   | 127264   | 0        |
| fpHILIC | Negative | 280.1401 | 2.30 | unknown | 3290731  | 2185687  | 4227312  | 2114630   | 2345442  | 3041519  | 2790065  | 1936026  | 1719045  | 3406129  | 1543382  | 1343286  | 1752765  | 1212786  | 1690483  | 944406   | 1588260  | 2682824  | 732273   |
| EIC     | Negative | 447.3491 | 4.83 | unknown | 265986   | 39885    | 588894   | 1540983   | 168561   | 188169   | 304320   | 538520   | 304320   | 458421   | 52269    | 241745   | 280306   | 0        | 26762    | 64006    | 177748   | 522597   | 43969    |
| fpHILIC | Positive | 137.0456 | 2.43 | unknown | 5189035  | 1114892  | 8228001  | 648230    | 3473628  | 2838702  | 1535668  | 605422   | 2861422  | 842784   | 114232   | 62780    | 4348725  | 3770120  | 0        | 63538    | 0        | 7187571  | 57573    |
| EIC     | Negative | 269.1762 | 3.10 | unknown | 1867852  | 462747   | 1123918  | 768329    | 1076657  | 760588   | 1529475  | 318028   | 958566   | 345514   | 489913   | 378560   | 391629   | 545073   | 475271   | 464391   | 1049113  | 310139   | 0        |
| EIC     | Negative | 250.1893 | 5.68 | unknown | 371846   | 541409   | 910174   | 2733192   | 1044401  | 555202   | 793390   | 1010205  | 1371668  | 697546   | 425412   | 834786   | 733700   | 244888   | 226347   | 511446   | 793733   | 1195951  | 356595   |
| EIC     | Negative | 551.3238 | 3.55 | unknown | 572068   | 738631   | 606387   | 636138    | 756886   | 564782   | 631893   | 492578   | 477927   | 526974   | 599559   | 631474   | 570603   | 569719   | 570468   | 521857   | 519432   | 0        | 161393   |
| EIC     | Negative | 342.2371 | 3.69 | unknown | 241833   | 99630    | 239730   | 158615    | 112674   | 118636   | 179308   | 223000   | 46631    | 168864   | 77673    | 96422    | 72290    | 45398    | 61985    | 63157    | 66264    | 169147   | 76061    |
| EIC     | Negative | 397.2228 | 6.51 | unknown | 112554   | 98091    | 451856   | 451344    | 276002   | 105078   | 0        | 83185    | 602945   | 304294   | 384547   | 109925   | 281662   | 54032    | 85590    | 254041   | 221211   | 63264    | 65496    |
| EIC     | Negative | 391.2861 | 6.39 | unknown | 5481023  | 3546600  | 4986900  | 4501543   | 3256071  | 2675273  | 2571768  | 4002503  | 1571232  | 3715085  | 2617304  | 1659741  | 1796960  | 685636   | 2449632  | 1491056  | 1936563  | 1832682  | 1400875  |
| EIC     | Negative | 433.3329 | 5.44 | unknown | 856223   | 133339   | 1429536  | 459490    | 509043   | 209186   | 224123   | 949704   | 208217   | 506893   | 126271   | 139003   | 103238   | 158287   | 173421   | 141720   | 180542   | 671408   | 193879   |
| EIC     | Negative | 448.3171 | 4.05 | unknown | 1016422  | 72224    | 845051   | 287558    | 58867    | 101883   | 110639   | 445861   | 64080    | 323784   | 54129    | 51054    | 54235    | 140981   | 55563    | 14639    | 58102    | 306682   | 44684    |
| EIC     | Negative | 464.3023 | 2.45 | unknown | 923957   | 0        | 1261741  | 678299    | 102113   | 222587   | 0        | 1725151  | 105171   | 32247    | 0        | 0        | 0        | 5622     | 1392968  | 0        | 5622     | 1392968  | 0        |
| EIC     | Negative | 319.2220 | 4.29 | unknown | 4640990  | 1060134  | 4884373  | 734596    | 229632   | 813950   | 1089481  | 490336   | 0        | 4512700  | 458694   | 1614733  | 329199   | 408153   | 222604   | 300609   | 404047   | 443630   | 332816   |
| fpHILIC | Positive | 455.1818 | 2.23 | unknown | 4153546  | 1478302  | 2795455  | 3235968   | 1676489  | 2079020  | 1523825  | 1868253  | 2397853  | 2188290  | 1830555  | 2089677  | 1790433  | 1095150  | 964528   | 1443230  | 1108372  | 1484245  | 1206508  |
| EIC     | Negative | 415.2110 | 5.67 | unknown | 876437   | 438132   | 824711   | 698282    | 665095   | 484715   | 576080   | 657157   | 530746   | 657157   | 391316   | 493555   | 404481   | 335285   | 365776   | 419099   | 400404   | 542151   | 323944   |
| EIC     | Negative | 365.2275 | 5.83 | unknown | 708982   | 748058   | 676048   | 763131    | 606998   | 770739   | 897229   | 681335   | 679721   | 558658   | 727801   | 413908   | 605536   | 832027   | 793762   | 0        | 731733   | 369586   | 473710   |
| EIC     | Negative | 419.3168 | 2.97 | unknown | 152449   | 0        | 146585   | 63186     | 8930     | 0        | 20920    | 0        | 0        | 0        | 0        | 0        | 0        | 0        | 0        | 0        | 0        | 162830   | 0        |
| fpHILIC | Positive | 69.0454  | 0.95 | unknown | 484137   | 760297   | 608595   | 352325    | 474479   | 385829   | 395781   | 229714   | 236924   | 249371   | 269470   | 130912   | 145244   | 232162   | 221773   | 261996   | 220269   | 211974   | 206479   |
| fpHILIC | Positive | 460.2698 | 0.40 | unknown | 3822787  | 2645492  | 2444374  | 2556330   | 3177535  | 2746609  | 2356125  | 2521691  | 3401749  | 2429663  | 2093497  | 2427495  | 2494771  | 2131666  | 1438192  | 1896389  | 1796896  | 2429251  | 1502495  |
| EIC     | Negative | 387.2756 | 5.83 | unknown | 13678795 | 15313858 | 13222057 | 13518143  | 11212696 | 15109409 | 20294946 | 13111255 | 1710459  | 9827503  | 13756211 | 6458564  | 11337553 | 18172857 | 16358779 | 3752140  | 13684285 | 5074958  | 7774598  |
| EIC     | Negative | 625.4811 | 6.41 | unknown | 387427   | 308019   | 485601   | 1539399   | 612634   | 201588   | 492117   | 627977   | 1003796  | 552021   | 472671   | 329088   | 539693   | 115642   | 670897   | 359161   | 735752   | 152909   | 0        |
| EIC     | Negative | 251.2015 | 6.06 | unknown | 43752752 | 53050435 | 86427131 | 162296814 | 80868970 | 41449959 | 66289329 | 83264971 | 99011416 | 55944455 | 38210157 | 48826992 | 61802482 | 30006368 | 31493716 | 41880441 | 53735961 | 80578431 | 34645108 |
| EIC     | Negative | 291.1276 | 3.89 | unknown | 175781   | 189018   | 313106   | 285232    | 201232   | 164527   | 281982   | 359780   | 359780   | 230683   | 145063   | 286220   | 625493   | 100296   | 97818    | 171777   | 211853   | 202939   | 121491   |
| EIC     | Negative | 489.3230 | 4.27 | unknown | 5520290  | 1375150  | 6256163  | 3442575   | 1851580  | 1785572  | 2250491  | 5759206  | 2189070  | 2279703  | 1228800  | 1444905  | 1244939  | 2756531  | 1711338  | 1091194  | 1420268  | 3583729  | 1240808  |
| EIC     | Negative | 279.1583 | 4.60 | unknown | 355419   | 541022   | 1038830  | 2092610   | 913920   | 357076   | 975211   | 928517   | 1180800  | 809966   | 351178   | 883829   | 732545   | 218263   | 200848   | 561012   | 680957   | 1055491  | 352573   |
| EIC     | Negative | 355.2133 | 3.61 | unknown | 367497   | 92510    | 284932   | 130114    | 0        | 29859    | 0        | 29859    | 0        | 149308   | 78140    | 102387   | 67102    | 56957    | 73574    | 0        | 96573    | 0        | 0        |
| EIC     | Negative | 577.3506 | 2.91 | unknown | 313851   | 170821   | 293489   | 435565    | 116020   | 277222   | 117390   | 118427   | 0        | 269678   | 73259    | 289792   | 230582   | 0        | 184339   | 94482    | 79392</  |          |          |



|         |          |          |         |         |          |          |          |          |          |          |          |          |          |          |          |          |          |          |          |          |          |          |          |        |
|---------|----------|----------|---------|---------|----------|----------|----------|----------|----------|----------|----------|----------|----------|----------|----------|----------|----------|----------|----------|----------|----------|----------|----------|--------|
| EIC     | Negative | 411.2754 | 5.46    | unknown | 7447854  | 6089325  | 6024853  | 8164242  | 1444196  | 4666294  | 6727550  | 4875568  | 5921111  | 5190127  | 6070035  | 2562884  | 4312465  | 6123887  | 7169799  | 1099346  | 5214171  | 1977678  | 2162121  |        |
| fpHILIC | Negative | 484.2738 | 0.46    | unknown | 1051345  | 0        | 1832755  | 1737800  | 0        | 0        | 0        | 3086059  | 0        | 1105677  | 0        | 0        | 0        | 0        | 0        | 0        | 0        | 0        | 2065543  | 0      |
| EIC     | Negative | 244.1999 | 3.00    | unknown | 309423   | 226013   | 587539   | 1478437  | 487949   | 345106   | 398921   | 894556   | 590726   | 589178   | 312789   | 558758   | 450707   | 117745   | 93665    | 379437   | 369646   | 827267   | 149494   |        |
| EIC     | Negative | 269.1762 | 2.92    | unknown | 536759   | 84222    | 391151   | 257495   | 157422   | 190487   | 170942   | 272160   | 151195   | 341147   | 103833   | 161263   | 112027   | 87974    | 111897   | 117615   | 91097    | 232649   | 77725    |        |
| EIC     | Negative | 444.1910 | 3.26    | unknown | 62286    | 69077    | 71960    | 214389   | 11271    | 80466    | 47937    | 35421    | 22303    | 72517    | 36065    | 26601    | 11584    | 7747     | 38746    | 80097    | 13526    | 0        | 251718   |        |
| EIC     | Negative | 314.2418 | 6.38    | unknown | 5651504  | 2901304  | 5818493  | 4431561  | 3857876  | 2982985  | 4292496  | 6749938  | 2101483  | 3899225  | 2451557  | 2389548  | 2180183  | 1793369  | 2476144  | 2236110  | 2337400  | 4207348  | 2145718  |        |
| EIC     | Negative | 393.2589 | 6.44    | unknown | 9336188  | 6207880  | 2242120  | 4932579  | 4130178  | 5735690  | 6909588  | 6744200  | 3103711  | 4699390  | 5866225  | 2720290  | 3939876  | 5349651  | 4837909  | 2157774  | 4578307  | 3039381  | 3306600  |        |
| EIC     | Negative | 334.2108 | 5.67    | unknown | 3071011  | 1445132  | 2978681  | 2452294  | 2024287  | 1544492  | 1995147  | 2932768  | 1539717  | 2140078  | 1286027  | 1387463  | 1321621  | 1082868  | 1227417  | 1184818  | 1232213  | 2038025  | 1050591  |        |
| EIC     | Negative | 630.3501 | 3.90    | unknown | 0        | 483808   | 154653   | 186224   | 0        | 132824   | 371838   | 136965   | 103287   | 126779   | 159495   | 0        | 27884    | 65986    | 480759   | 57546    | 25292    | 25350    | 166583   | 242102 |
| EIC     | Negative | 437.2907 | 6.20    | unknown | 17085576 | 6287392  | 11071505 | 24863419 | 4900613  | 5054590  | 5252207  | 12912766 | 8350172  | 9398981  | 5302988  | 2989670  | 5727261  | 6128363  | 5742555  | 2302379  | 5788101  | 7349899  | 3394032  |        |
| EIC     | Negative | 271.2281 | 4.03    | unknown | 5272897  | 4560071  | 16272474 | 47940624 | 11893512 | 8179565  | 9415012  | 28251870 | 19290084 | 14830210 | 7624512  | 14258891 | 12701426 | 3645091  | 1881558  | 13639944 | 9336421  | 22877605 | 4218276  |        |
| EIC     | Negative | 629.3662 | 5.12    | unknown | 3287967  | 913886   | 2231067  | 2504673  | 1541402  | 2208850  | 2055924  | 2125751  | 338049   | 1425826  | 1145351  | 1673460  | 864090   | 546046   | 1203068  | 455352   | 1082540  | 1669744  | 1172598  |        |
| EIC     | Negative | 541.3410 | 3.92    | unknown | 563949   | 22128    | 2397636  | 1297449  | 31635    | 0        | 1525267  | 22700    | 905841   | 23267    | 21717    | 21310    | 72569    | 70412    | 29027    | 20618    | 946994   | 0        | 0        |        |
| EIC     | Negative | 583.4929 | 6.42    | unknown | 8661649  | 12576420 | 10145866 | 14521306 | 13093745 | 11802531 | 6733589  | 10695580 | 14204331 | 10874786 | 935153   | 7697771  | 10970569 | 8084970  | 6359422  | 7970176  | 7427479  | 8808213  | 7624692  |        |
| EIC     | Negative | 272.2314 | 4.02    | unknown | 1009204  | 832618   | 2778901  | 8352971  | 2077710  | 1447028  | 1711976  | 5102833  | 3463060  | 2597694  | 1350052  | 2535319  | 2263260  | 643973   | 349358   | 2408663  | 1714773  | 4103245  | 749733   |        |
| EIC     | Negative | 329.2330 | 4.05    | unknown | 466155   | 260107   | 551525   | 456398   | 325984   | 301919   | 316141   | 444117   | 316141   | 390284   | 191617   | 237701   | 228801   | 167506   | 176182   | 168080   | 201080   | 291184   | 213264   |        |
| EIC     | Negative | 632.3939 | 6.09    | unknown | 474487   | 539017   | 430424   | 321722   | 425380   | 622953   | 504798   | 374344   | 278045   | 297188   | 396299   | 359671   | 337405   | 256364   | 324174   | 226361   | 316583   | 250460   | 375935   |        |
| fpHILIC | Positive | 234.1440 | 2.50    | unknown | 805893   | 431872   | 387927   | 881939   | 499159   | 542072   | 390254   | 549625   | 650407   | 517184   | 519862   | 276746   | 501078   | 179006   | 327535   | 524188   | 370705   | 274047   | 248955   |        |
| EIC     | Negative | 385.2271 | 3.29    | unknown | 331145   | 52474    | 463893   | 927893   | 41981    | 42938    | 39877    | 123823   | 43736    | 259708   | 12091    | 212575   | 47587    | 39357    | 45049    | 28236    | 46161    | 78659    | 0        |        |
| EIC     | Negative | 502.2946 | 5.13    | unknown | 7014199  | 10381541 | 6871217  | 5180213  | 9041237  | 9335374  | 7575243  | 6026649  | 3955518  | 6508217  | 5043632  | 4789132  | 8016565  | 5290844  | 2857627  | 6436273  | 4339562  | 6795107  | 0        |        |
| EIC     | Negative | 300.2626 | 5.25    | unknown | 413202   | 354940   | 963202   | 1812050  | 603454   | 465835   | 547594   | 1279108  | 790955   | 616970   | 347650   | 628592   | 539149   | 470635   | 180229   | 580607   | 414946   | 942533   | 382797   |        |
| fpHILIC | Negative | 559.4728 | 0.37    | unknown | 1879888  | 1921965  | 3655425  | 3869433  | 2747745  | 1601809  | 2289407  | 2355071  | 3281032  | 16469925 | 1520217  | 2176134  | 1787894  | 1316562  | 1611630  | 1501437  | 1603455  | 2019386  | 1593312  |        |
| EIC     | Negative | 438.2941 | 6.12    | unknown | 6342095  | 4798799  | 492784   | 9507360  | 4551740  | 6663674  | 5693233  | 5527689  | 5972761  | 4976556  | 4938865  | 2854197  | 3705743  | 4420503  | 5598564  | 2161624  | 5674525  | 2822176  | 3023107  |        |
| EIC     | Negative | 319.2279 | 3.36    | unknown | 3770608  | 0        | 0        | 3187172  | 0        | 490994   | 559257   | 0        | 490994   | 559257   | 0        | 2112354  | 1535557  | 0        | 0        | 0        | 0        | 1334321  | 0        |        |
| EIC     | Negative | 300.1684 | 3.12    | unknown | 21567    | 12936    | 25409    | 200392   | 101469   | 0        | 9833     | 110990   | 9550     | 16360    | 8615     | 0        | 10724    | 0        | 0        | 14316    | 11276    | 132105   | 0        |        |
| EIC     | Negative | 337.2044 | 3.16    | unknown | 378833   | 115512   | 376422   | 181219   | 140645   | 187853   | 91046    | 259348   | 32868    | 239015   | 95438    | 118159   | 42823    | 49359    | 136807   | 61484    | 133435   | 0        | 152493   |        |
| EIC     | Negative | 279.1605 | 2.39    | unknown | 1076035  | 574560   | 834057   | 798949   | 679713   | 1035419  | 856114   | 970821   | 241155   | 853557   | 458635   | 578475   | 474646   | 399010   | 580892   | 350472   | 574305   | 585660   | 485982   |        |
| EIC     | Negative | 265.1811 | 3.69    | unknown | 319634   | 374805   | 363750   | 1774516  | 556935   | 371779   | 501533   | 546276   | 1132793  | 957357   | 330087   | 397268   | 610660   | 197402   | 168038   | 548558   | 468196   | 706077   | 227950   |        |
| EIC     | Negative | 579.2262 | 2.92    | unknown | 519117   | 276374   | 159170   | 240021   | 129627   | 218625   | 107095   | 315651   | 141443   | 424278   | 144741   | 166045   | 186365   | 48420    | 87478    | 136239   | 61733    | 303192   | 33878    |        |
| fpHILIC | Negative | 284.1001 | 2.28    | unknown | 1330715  | 1170751  | 1311107  | 914257   | 986548   | 1216872  | 1001693  | 711212   | 700694   | 1187374  | 703220   | 644900   | 864211   | 519406   | 539380   | 447314   | 827952   | 898917   | 451514   |        |
| EIC     | Negative | 243.1965 | 4.65    | unknown | 2055635  | 2899105  | 4679192  | 15185516 | 5414785  | 3369931  | 4962605  | 5623973  | 7068209  | 5586228  | 2744606  | 4834370  | 4539549  | 1484616  | 1178040  | 3496910  | 3821555  | 7851520  | 1704260  |        |
| EIC     | Negative | 628.3628 | 5.12    | unknown | 9098642  | 2573010  | 6143616  | 6742600  | 4248086  | 5903239  | 5840549  | 896207   | 4008529  | 3325108  | 4819518  | 2436415  | 1520720  | 3203284  | 1333263  | 3012238  | 4726264  | 3435352  | 0        |        |
| EIC     | Negative | 440.3104 | 6.35    | unknown | 597214   | 820435   | 816199   | 1020067  | 621016   | 860566   | 702955   | 683955   | 828443   | 778162   | 684787   | 452227   | 450440   | 696046   | 641739   | 103472   | 629181   | 480223   | 467132   |        |
| EIC     | Negative | 269.2125 | 3.74    | unknown | 1576778  | 816803   | 2601957  | 2469425  | 1748236  | 1273689  | 1576982  | 2870583  | 1483565  | 665800   | 873343   | 1153833  | 1157604  | 952187   | 628244   | 1160266  | 1172623  | 2248787  | 913612   |        |
| EIC     | Negative | 270.2159 | 5.19    | unknown | 423330   | 581235   | 825766   | 2691090  | 1149418  | 5861138  | 926112   | 920231   | 1330401  | 195010   | 603005   | 1086382  | 822437   | 285662   | 248860   | 697671   | 672434   | 1404129  | 323460   |        |
| EIC     | Negative | 430.3046 | 4.27    | unknown | 2594495  | 745742   | 3015547  | 1648681  | 1021240  | 957103   | 1065008  | 2730953  | 1069588  | 1170843  | 575130   | 783304   | 629378   | 1373701  | 884466   | 635292   | 704759   | 1866229  | 990915   |        |
| EIC     | Negative | 416.2114 | 5.67    | unknown | 218629   | 113540   | 214909   | 174307   | 141954   | 119071   | 143954   | 226994   | 106138   | 106747   | 118824   | 110610   | 106367   | 98217    | 110361   | 114475   | 110610   | 124127   | 970025   |        |
| EIC     | Negative | 279.2234 | 6.29    | unknown | 7118742  | 7399854  | 10917204 | 15183376 | 11093891 | 6563814  | 8356655  | 10803921 | 12520763 | 6900215  | 9547453  | 7694923  | 5305494  | 3870912  | 6876145  | 8282935  | 9097763  | 7742973  | 0        |        |
| EIC     | Negative | 447.3129 | 4.05    | unknown | 3274078  | 310686   | 2561497  | 960237   | 273835   | 427893   | 351359   | 1550906  | 262944   | 1212910  | 192501   | 213167   | 448108   | 247515   | 167004   | 184910   | 254299   | 1139693  | 1407253  |        |
| EIC     | Negative | 266.1846 | 3.69    | unknown | 40389    | 64324    | 91808    | 390519   | 102007   | 69528    | 88080    | 96349    | 202000   | 106674   | 65198    | 70099    | 108012   | 30950    | 30659    | 92425    | 85365    | 133145   | 41392    |        |
| EIC     | Negative | 348.1914 | 6.06    | unknown | 153666   | 188659   | 275357   | 453828   | 236669   | 125180   | 228622   | 183236   | 160311   | 121865   | 160311   | 210865   | 106627   | 97301    | 139729   | 171147   | 247105   | 118814   | 0        |        |
| EIC     | Negative | 511.3063 | 4.27    | unknown | 1415421  | 611166   | 1535189  | 1032175  | 681237   | 724435   | 845434   | 1614209  | 740860   | 701402   | 502665   | 606134   | 509423   | 877797   | 655806   | 431455   | 554243   | 969723   | 554422   |        |
| EIC     | Negative | 325.0019 | 1.26    | unknown | 6433679  | 5156853  | 6177297  | 3604459  | 3888255  | 3789622  | 3754061  | 4135063  | 3203105  | 4564356  | 3397115  | 1139206  | 2382322  | 2803283  | 2664326  | 3527233  | 1687554  | 1996721  | 2979245  |        |
| EIC     | Negative | 437.2907 | 6.12    | unknown | 23079924 | 17786820 | 15207782 | 33502704 | 15924624 | 23746981 | 20359145 | 19444545 | 21378163 | 17619791 | 15883146 | 10342918 | 13124648 | 15719536 | 20461872 | 7549218  | 20423256 | 10315032 | 10667389 |        |
| EIC     | Negative | 301644   | 14.1974 | 3.74    | unknown  | 301644   | 141974   | 473371   | 434326   | 293913   | 512897   | 282380   | 319408   | 1678226  | 202125   | 198219   | 173972   | 113004   | 218274   | 208446   | 1083052  | 170007   | 0        |        |
| EIC     | Negative | 565.4469 | 4.14    | unknown | 57978    | 46178    | 282315   | 334844   | 144021   | 75754    | 131751   | 372725   | 138326   | 150485   | 57931    | 59111    | 65197    | 192002   | 196409   | 43050    | 115328   | 298003   | 115794   |        |
| fpHILIC | Positive | 236.1686 | 2.28    | unknown | 9998151  | 3638727  | 8072779  | 6271562  | 5072919  | 6234539  | 4660713  | 6908636  | 2337336  | 5743314  | 4052324  | 3130039  | 3424944  | 1627727  | 3845669  | 3047547  | 2468077  | 6459702  | 1592313  |        |
| EIC     | Negative | 463.3444 | 5.22    | unknown | 433154   | 0        | 219975   | 46082    | 0        | 0        | 102563   | 0        | 63498    | 0        | 242114   | 427589   | 461384   | 217500   | 26409    | 0        | 0        | 44750    | 0        |        |
| EIC     | Negative | 266.1844 |         |         |          |          |          |          |          |          |          |          |          |          |          |          |          |          |          |          |          |          |          |        |

|         |          |          |      |         |           |           |           |           |           |           |           |           |           |           |           |           |           |           |           |           |           |           |           |
|---------|----------|----------|------|---------|-----------|-----------|-----------|-----------|-----------|-----------|-----------|-----------|-----------|-----------|-----------|-----------|-----------|-----------|-----------|-----------|-----------|-----------|-----------|
| EIC     | Negative | 273.2073 | 2.36 | unknown | 521331    | 145261    | 419161    | 448019    | 271753    | 332837    | 256414    | 623238    | 137310    | 526920    | 136414    | 163433    | 141068    | 93722     | 137227    | 147175    | 210823    | 488519    | 151952    |
| fpHILIC | Negative | 498.2898 | 0.44 | unknown | 57871648  | 1114611   | 73275488  | 88571296  | 1108062   | 1487736   | 1883424   | 68525880  | 3040223   | 36730376  | 1181197   | 1024233   | 1971105   | 1894498   | 1511511   | 1017314   | 1363793   | 4809900   | 1280809   |
| EIC     | Negative | 239.2015 | 6.35 | unknown | 872575    | 1001780   | 2147466   | 1451232   | 1043837   | 1175207   | 1541945   | 1651400   | 962707    | 732141    | 975424    | 1309844   | 740311    | 416684    | 1022534   | 1102901   | 1336012   | 915022    | 0         |
| EIC     | Negative | 337.2139 | 5.68 | unknown | 471921    | 161366    | 348239    | 430822    | 200350    | 148718    | 199566    | 278477    | 252398    | 261983    | 193385    | 158411    | 182321    | 282696    | 217666    | 34562     | 182411    | 169698    | 153866    |
| EIC     | Negative | 325.0019 | 1.41 | unknown | 581634    | 1347719   | 0         | 0         | 843975    | 875519    | 781141    | 0         | 542929    | 0         | 904486    | 149623    | 410718    | 620614    | 485298    | 847242    | 236082    | 0         | 569884    |
| EIC     | Negative | 597.2296 | 1.96 | unknown | 0         | 124311    | 0         | 0         | 30981     | 43107     | 115908    | 0         | 0         | 0         | 173400    | 65998     | 98688     | 17445     | 18124     | 56337     | 44667     | 0         | 14458     |
| EIC     | Negative | 343.8252 | 5.82 | unknown | 106125    | 90899     | 135474    | 465899    | 184128    | 66108     | 218402    | 120200    | 148536    | 141302    | 72036     | 169927    | 198412    | 27872     | 86670     | 70654     | 122992    | 177347    | 61091     |
| EIC     | Negative | 301.2657 | 5.38 | unknown | 110398    | 83274     | 280705    | 320550    | 130187    | 57816     | 125943    | 254022    | 177157    | 130970    | 66656     | 127399    | 108372    | 156589    | 58850     | 44216     | 96225     | 214679    | 111039    |
| EIC     | Negative | 300.9577 | 1.25 | unknown | 416267    | 261908    | 382481    | 266174    | 193912    | 159896    | 156821    | 198005    | 151194    | 297862    | 138242    | 68665     | 95311     | 150809    | 110468    | 126333    | 70991     | 150000    | 148367    |
| EIC     | Negative | 319.2275 | 3.96 | unknown | 438621    | 0         | 602687    | 1774346   | 506895    | 346558    | 435054    | 806054    | 616081    | 715289    | 359739    | 682666    | 570607    | 0         | 471903    | 385161    | 1053992   | 0         | 0         |
| EIC     | Negative | 540.3376 | 3.93 | unknown | 1633091   | 131894    | 7543868   | 4069398   | 157416    | 52675     | 63859     | 4598456   | 173784    | 2730419   | 157401    | 159341    | 163381    | 312895    | 251508    | 171092    | 150938    | 2809367   | 175496    |
| EIC     | Negative | 429.2860 | 3.73 | unknown | 495029    | 284322    | 534715    | 341761    | 265730    | 284548    | 404091    | 377561    | 353905    | 487159    | 396797    | 131616    | 196034    | 408913    | 360485    | 104036    | 331733    | 165049    | 227802    |
| EIC     | Negative | 251.2015 | 5.80 | unknown | 315389    | 429524    | 757563    | 1316072   | 728961    | 466874    | 615802    | 912301    | 801089    | 518200    | 385913    | 575703    | 651712    | 337943    | 297663    | 458053    | 556449    | 783665    | 392152    |
| fpHILIC | Negative | 670.3730 | 0.54 | unknown | 1021559   | 298692    | 501749    | 0         | 299914    | 346945    | 385285    | 139086    | 550929    | 0         | 426250    | 0         | 65290     | 269183    | 107459    | 579609    | 0         | 0         | 388732    |
| EIC     | Negative | 568.0678 | 1.26 | unknown | 1464789   | 1394013   | 1530690   | 933443    | 1065096   | 968716    | 1046694   | 1129972   | 960993    | 1212833   | 999706    | 225377    | 664374    | 794870    | 794670    | 980412    | 448756    | 513317    | 920207    |
| EIC     | Negative | 271.2281 | 6.35 | unknown | 19613268  | 11590651  | 21630409  | 4846104   | 15988647  | 17469753  | 15688630  | 20047482  | 20088957  | 16965355  | 12946519  | 18926555  | 15136803  | 6789210   | 6440425   | 17145834  | 11152821  | 18934760  | 9491349   |
| EIC     | Negative | 500.1029 | 1.26 | unknown | 74896     | 87365     | 114092    | 23704     | 65760     | 70088     | 69733     | 0         | 55618     | 64264     | 61926     | 0         | 21992     | 54359     | 37650     | 73243     | 14585     | 0         | 59359     |
| EIC     | Negative | 242.1841 | 3.82 | unknown | 140682    | 202346    | 201031    | 907014    | 341021    | 216614    | 262946    | 289702    | 534889    | 364233    | 203865    | 294678    | 276195    | 107899    | 92125     | 241931    | 231841    | 494600    | 104412    |
| EIC     | Negative | 235.1338 | 3.97 | unknown | 161961    | 127812    | 234362    | 631170    | 204298    | 131612    | 212651    | 265532    | 297303    | 270731    | 123611    | 201855    | 211595    | 75786     | 75940     | 180680    | 150461    | 296219    | 83747     |
| EIC     | Negative | 299.2592 | 5.25 | unknown | 1943541   | 1730384   | 4699885   | 11079545  | 3031889   | 2102759   | 2793466   | 6651657   | 3891926   | 3276850   | 1956483   | 3245582   | 2847690   | 2323289   | 1064351   | 3069982   | 2281325   | 4683094   | 1987452   |
| EIC     | Negative | 272.2315 | 6.35 | unknown | 3426097   | 2062643   | 3767409   | 8766704   | 2815857   | 3126207   | 2702680   | 3582805   | 3644991   | 3095700   | 2375110   | 3294645   | 2705496   | 1239559   | 1101690   | 3057113   | 1973595   | 3405716   | 1716096   |
| EIC     | Negative | 523.3292 | 2.46 | unknown | 287624    | 35573     | 456726    | 230300    | 38668     | 85076     | 68544     | 58544     | 35212     | 313987    | 42242     | 40601     | 35552     | 60539     | 51976     | 35846     | 44109     | 482406    | 31341     |
| fpHILIC | Negative | 223.1703 | 0.39 | unknown | 4339681   | 3047194   | 6974932   | 13867830  | 5357696   | 4347734   | 6212667   | 6563548   | 5953082   | 6400800   | 2923116   | 6546050   | 5557190   | 1099285   | 2030941   | 3235063   | 5194698   | 7147808   | 2581118   |
| fpHILIC | Positive | 235.1649 | 2.28 | unknown | 94304776  | 35476624  | 73098192  | 55152416  | 43967456  | 57581780  | 41132560  | 6376384   | 22889136  | 54688660  | 24850214  | 27720346  | 28826584  | 14688727  | 31592438  | 26532842  | 26540024  | 61603976  | 16539002  |
| fpHILIC | Negative | 187.1341 | 0.41 | unknown | 3200682   | 1387488   | 2641801   | 4431181   | 2200016   | 3204851   | 2153333   | 2360765   | 2292109   | 24323291  | 1229455   | 2014258   | 2003321   | 1401658   | 1256283   | 1635022   | 1688811   | 2619279   | 1478905   |
| EIC     | Negative | 239.1653 | 2.25 | unknown | 570532    | 271265    | 617823    | 957294    | 394176    | 351602    | 446720    | 697603    | 541798    | 645050    | 286737    | 398079    | 357646    | 140118    | 210400    | 429839    | 247145    | 675838    | 166308    |
| EIC     | Negative | 297.2436 | 4.52 | unknown | 3508333   | 2030131   | 10212497  | 34816343  | 6429336   | 4432925   | 5623635   | 18234081  | 10925161  | 9017520   | 4715858   | 11340752  | 8816223   | 2284768   | 857299    | 9545858   | 5565335   | 14098722  | 2398361   |
| EIC     | Negative | 414.2940 | 6.17 | unknown | 86087236  | 96979381  | 81159144  | 110162719 | 69994648  | 88803355  | 98296621  | 80521717  | 18716140  | 67518712  | 89010633  | 49512511  | 67273031  | 83187172  | 90043031  | 35802353  | 79012214  | 141037989 | 49915367  |
| EIC     | Negative | 607.3817 | 5.85 | unknown | 877288    | 1195102   | 906465    | 722663    | 1003986   | 1435079   | 1298953   | 820146    | 380272    | 622258    | 969979    | 877784    | 769428    | 619468    | 836622    | 512089    | 813730    | 524398    | 829777    |
| EIC     | Negative | 237.1495 | 2.22 | unknown | 664862    | 358989    | 540178    | 999190    | 457710    | 463047    | 678949    | 669874    | 495187    | 673048    | 338391    | 527599    | 516817    | 138491    | 297959    | 520647    | 329213    | 603267    | 218070    |
| EIC     | Negative | 252.1320 | 2.54 | unknown | 203260    | 96669     | 164411    | 109361    | 101154    | 116582    | 161800    | 176775    | 94325     | 130944    | 80488     | 69890     | 68714     | 75045     | 71035     | 83561     | 69865     | 149064    | 90027     |
| EIC     | Negative | 291.1967 | 4.29 | unknown | 272032    | 304134    | 299701    | 1140857   | 349769    | 261396    | 334599    | 396791    | 828668    | 372601    | 220320    | 246944    | 477969    | 137374    | 165504    | 472312    | 339625    | 427757    | 142235    |
| EIC     | Negative | 268.2000 | 4.37 | unknown | 564406    | 657497    | 910964    | 3624477   | 1165213   | 714865    | 853245    | 1072625   | 1592499   | 1080720   | 614093    | 1194814   | 880242    | 326967    | 318856    | 751369    | 744261    | 170762    | 329005    |
| EIC     | Negative | 490.3259 | 4.27 | unknown | 1783647   | 476218    | 2036975   | 1090091   | 641144    | 646642    | 747150    | 1804523   | 664013    | 751895    | 416608    | 453883    | 475730    | 974195    | 622244    | 439362    | 488281    | 1203727   | 459471    |
| EIC     | Negative | 504.2994 | 5.13 | unknown | 358642    | 557697    | 334336    | 299862    | 418689    | 476564    | 409844    | 321693    | 288158    | 185915    | 454760    | 273962    | 442625    | 299508    | 161746    | 361540    | 223933    | 319821    | 0         |
| fpHILIC | Negative | 329.2497 | 0.37 | unknown | 10399700  | 7837418   | 12878024  | 20952898  | 7945118   | 10022139  | 10094753  | 11139261  | 14511024  | 10029115  | 661892    | 9472610   | 9150772   | 3869333   | 5808609   | 6386634   | 8686268   | 1064304   | 6992187   |
| EIC     | Negative | 258.1798 | 3.00 | unknown | 500643    | 156379    | 240620    | 196965    | 212664    | 246223    | 250146    | 289660    | 167162    | 277971    | 117656    | 180955    | 138488    | 120197    | 189336    | 117247    | 132402    | 210023    | 112131    |
| EIC     | Negative | 413.2911 | 6.17 | unknown | 335130417 | 378599278 | 312913782 | 426766988 | 276293192 | 344477427 | 377865620 | 310284522 | 305331119 | 261321798 | 344430175 | 190371126 | 263271813 | 324220719 | 351150379 | 138572006 | 307714424 | 161009747 | 196305326 |
| EIC     | Negative | 270.2159 | 4.05 | unknown | 421848    | 420757    | 960433    | 1701542   | 755695    | 607398    | 1304452   | 563711    | 1304452   | 668668    | 541899    | 663297    | 579687    | 251489    | 663297    | 600911    | 978106    | 442721    | 0         |
| fpHILIC | Negative | 253.0176 | 0.58 | unknown | 1241876   | 1234839   | 1546357   | 600929    | 1069252   | 2372199   | 1156200   | 1116924   | 464117    | 874151    | 1140837   | 934608    | 516597    | 1028903   | 1346928   | 634345    | 555111    | 864754    | 1026148   |
| EIC     | Negative | 251.1654 | 2.52 | unknown | 562635    | 493366    | 659447    | 1303149   | 356925    | 510374    | 589655    | 541510    | 616997    | 448060    | 1243830   | 480839    | 149147    | 382543    | 291500    | 299156    | 469899    | 629403    | 0         |
| fpHILIC | Negative | 195.1390 | 0.40 | unknown | 2563306   | 1263566   | 3013902   | 5073973   | 2173859   | 1756881   | 2617738   | 2973072   | 2871619   | 2156031   | 1605967   | 2342008   | 2351653   | 653425    | 1001545   | 1684237   | 1847344   | 3188465   | 1147778   |
| EIC     | Negative | 263.2017 | 6.07 | unknown | 158069    | 232884    | 197153    | 459204    | 231898    | 165045    | 224051    | 222913    | 294388    | 184441    | 149181    | 218832    | 236272    | 108075    | 167399    | 180838    | 185427    | 148465    | 135326    |
| EIC     | Negative | 273.2342 | 6.35 | unknown | 393132    | 208249    | 388674    | 998159    | 335656    | 359680    | 297646    | 368362    | 415939    | 342768    | 242269    | 408356    | 298466    | 142931    | 133157    | 348766    | 200893    | 406121    | 188074    |
| EIC     | Negative | 502.2945 | 5.44 | unknown | 510472    | 459371    | 421710    | 338331    | 407438    | 547513    | 453660    | 265576    | 306050    | 252337    | 224735    | 365689    | 0         | 312700    | 124516    | 371031    | 366221    | 310159    | 0         |
| EIC     | Negative | 254.1762 | 3.17 | unknown | 111989    | 71228     | 117452    | 449664    | 86213     | 98252     | 102202    | 133157    | 202725    | 116374    | 92622     | 119533    | 126092    | 0         | 62951     | 139769    | 98947     | 146037    | 0         |
| EIC     | Negative | 343.2879 | 5.83 | unknown | 57248     | 24262     | 313962    | 474327    | 188867    | 125408    | 166413    | 245627    | 143291    | 0         | 102356    | 179691    | 199212    | 54804     | 58367     | 102044    | 141840    | 301306    | 21894     |
| EIC     | Negative | 378.8434 | 0.52 | unknown | 135591    | 119020    | 187906    | 196745    | 90696     | 100473    | 170932    | 128583    | 142835    | 150531    | 123855    | 116584    | 128101    | 50836     | 121044    | 0         | 99794     | 123022    |           |

|         |          |          |      |         |           |           |           |           |           |           |           |           |           |           |           |          |          |           |           |           |          |          |          |
|---------|----------|----------|------|---------|-----------|-----------|-----------|-----------|-----------|-----------|-----------|-----------|-----------|-----------|-----------|----------|----------|-----------|-----------|-----------|----------|----------|----------|
| EIC     | Negative | 247.1703 | 5.39 | unknown | 276534    | 154873    | 260841    | 934114    | 322502    | 250447    | 400902    | 483069    | 318059    | 414800    | 205005    | 381885   | 451526   | 65120     | 160082    | 323235    | 228323   | 472639   | 123747   |
| fpHILIC | Positive | 401.3458 | 0.59 | unknown | 1060111   | 804567    | 932055    | 1778829   | 811994    | 832212    | 888030    | 832440    | 1279922   | 716824    | 733685    | 715823   | 1148636  | 524882    | 672790    | 1040412   | 696387   | 811746   | 202567   |
| EIC     | Negative | 330.2370 | 3.80 | unknown | 126252    | 49009     | 116114    | 91595     | 57429     | 94978     | 62265     | 115363    | 22845     | 82713     | 40418     | 47919    | 43324    | 32167     | 38684     | 44497     | 50885    | 82588    | 43516    |
| EIC     | Negative | 237.1859 | 5.85 | unknown | 226270    | 337587    | 377137    | 1511878   | 4887739   | 269674    | 331665    | 458054    | 729618    | 449714    | 232297    | 305739   | 660094   | 118885    | 111798    | 492524    | 433815   | 497523   | 145021   |
| EIC     | Negative | 570.0723 | 1.25 | unknown | 105039    | 102796    | 103472    | 61608     | 66033     | 66838     | 72527     | 49124     | 102796    | 85291     | 71277     | 19263    | 50098    | 59653     | 54195     | 74652     | 37352    | 0        | 67868    |
| EIC     | Negative | 314.0529 | 2.41 | unknown | 144474    | 99381     | 173636    | 125504    | 82159     | 81420     | 91094     | 183561    | 50451     | 120266    | 117535    | 82850    | 45574    | 16749     | 70240     | 72120     | 33804    | 140918   | 44104    |
| fpHILIC | Negative | 180.0748 | 0.48 | unknown | 4946335   | 1830360   | 2280380   | 639779    | 1925813   | 2230611   | 2386008   | 2393673   | 2738400   | 2506953   | 2583704   | 275817   | 1252534  | 1310920   | 1680600   | 4680027   | 242095   | 658542   | 1379422  |
| EIC     | Negative | 399.2763 | 6.25 | unknown | 483226    | 283550    | 364318    | 406605    | 261537    | 303725    | 343222    | 372152    | 259484    | 312262    | 387894    | 221206   | 278872   | 275658    | 341744    | 172902    | 279044   | 176067   | 170888   |
| EIC     | Negative | 527.2983 | 5.23 | unknown | 2722947   | 857625    | 1726211   | 1861840   | 1569545   | 2322310   | 1955411   | 1700259   | 4739677   | 1169922   | 1302872   | 1915853  | 681863   | 847120    | 1432006   | 375553    | 1181863  | 1382558  | 1332313  |
| EIC     | Negative | 555.2803 | 1.77 | unknown | 327313    | 302425    | 366539    | 292538    | 94762     | 284825    | 418863    | 342728    | 329574    | 486120    | 297860    | 315061   | 241276   | 271942    | 81008     | 184833    | 226701   | 0        | 377582   |
| EIC     | Negative | 623.4355 | 6.31 | unknown | 369812    | 945629    | 1147921   | 1083086   | 675292    | 833249    | 423601    | 910643    | 1095717   | 685092    | 967500    | 857005   | 359565   | 433528    | 681641    | 549895    | 720150   | 542398   | 424867   |
| EIC     | Negative | 364.2129 | 6.41 | unknown | 3684288   | 5843763   | 4193842   | 4896897   | 4992972   | 4888764   | 6130560   | 4585280   | 4273805   | 3782903   | 4070371   | 4623172  | 3995011  | 3058874   | 3109589   | 4182504   | 4175445  | 3454976  | 3512249  |
| EIC     | Negative | 249.1498 | 3.21 | unknown | 576318    | 226536    | 652365    | 380270    | 306622    | 342820    | 193375    | 472675    | 106240    | 525557    | 257714    | 150243   | 118387   | 0         | 206633    | 141996    | 82134    | 494375   | 128911   |
| EIC     | Negative | 605.3660 | 5.13 | unknown | 813306    | 845605    | 852976    | 596549    | 629051    | 696055    | 751842    | 878645    | 431492    | 523395    | 656549    | 467428   | 579300   | 485106    | 476074    | 468790    | 560057   | 497353   | 54139    |
| EIC     | Negative | 523.3288 | 2.85 | unknown | 256295    | 293664    | 651565    | 1151813   | 320118    | 301476    | 305022    | 484209    | 363841    | 675137    | 330591    | 337443   | 177263   | 63632     | 109585    | 234334    | 252340   | 666470   | 54139    |
| EIC     | Negative | 543.4638 | 4.13 | unknown | 65876     | 36564     | 254447    | 313606    | 120051    | 59855     | 90529     | 283311    | 126580    | 165842    | 40846     | 51767    | 55041    | 167319    | 14104     | 36519     | 98759    | 267397   | 87955    |
| EIC     | Negative | 479.3384 | 3.43 | unknown | 793132    | 587026    | 1277553   | 1820816   | 2083086   | 1226026   | 2188121   | 2976608   | 5490471   | 3414057   | 1394849   | 4046267  | 3003509  | 232242    | 302557    | 2148050   | 2045046  | 5557631  | 310799   |
| EIC     | Negative | 399.2544 | 5.95 | unknown | 151982    | 341267    | 115809    | 351590    | 221878    | 252359    | 132650    | 590971    | 717050    | 171050    | 172774    | 193698   | 482098   | 146360    | 192881    | 226376    | 199436   | 123748   | 135129   |
| EIC     | Negative | 241.1808 | 3.07 | unknown | 4406545   | 1894670   | 5227629   | 8753114   | 3743397   | 3575270   | 4270157   | 5716151   | 3879312   | 4819262   | 2890125   | 4574877  | 4063113  | 1770885   | 1685169   | 3477505   | 2935024  | 6039820  | 1592872  |
| EIC     | Negative | 283.1919 | 3.90 | unknown | 784722    | 375015    | 724799    | 757021    | 543276    | 484738    | 623969    | 780275    | 546280    | 590204    | 357556    | 481618   | 371474   | 216892    | 358083    | 382136    | 313367   | 735127   | 1296849  |
| EIC     | Negative | 531.3320 | 3.74 | unknown | 430668    | 54299     | 705504    | 108617    | 89678     | 49794     | 50138     | 248010    | 57085     | 201956    | 43465     | 37108    | 14360    | 37189     | 36076     | 20455     | 44382    | 226383   | 40127    |
| EIC     | Negative | 227.1652 | 3.47 | unknown | 178601    | 157783    | 265079    | 917313    | 294091    | 176773    | 320156    | 374107    | 514669    | 347219    | 218857    | 357046   | 351788   | 105844    | 104504    | 326655    | 249704   | 485028   | 108156   |
| EIC     | Negative | 283.1921 | 4.83 | unknown | 328979    | 146382    | 415945    | 744323    | 241421    | 248188    | 297606    | 408934    | 166536    | 417041    | 194677    | 273073   | 309414   | 115680    | 120081    | 153160    | 193492   | 430964   | 116917   |
| EIC     | Negative | 265.1481 | 2.62 | unknown | 0         | 3106860   | 0         | 2042635   | 3169427   | 0         | 2233457   | 0         | 955941    | 0         | 0         | 2552354  | 1284163  | 0         | 0         | 1567854   | 0        | 0        | 3170900  |
| fpHILIC | Negative | 151.0401 | 0.52 | unknown | 687945216 | 305392160 | 289129408 | 81141120  | 294068128 | 315022112 | 384826944 | 316810048 | 453634016 | 323896288 | 339952544 | 2264593  | 97656424 | 202012784 | 208686112 | 669749952 | 43309780 | 91504664 | 30297888 |
| EIC     | Negative | 300.2626 | 5.38 | unknown | 1016646   | 756812    | 2093179   | 2655514   | 1035847   | 657689    | 987514    | 2125490   | 1392246   | 1031886   | 595276    | 681874   | 741265   | 1208745   | 563533    | 561983    | 762455   | 1714403  | 971914   |
| fpHILIC | Negative | 197.1546 | 0.41 | unknown | 8257199   | 2778161   | 5892637   | 11277799  | 4074439   | 4720874   | 4692571   | 6151330   | 3855338   | 4388535   | 2276990   | 4671450  | 4119327  | 1531831   | 2691067   | 2905592   | 2923578  | 6732657  | 2304286  |
| EIC     | Negative | 228.1686 | 3.47 | unknown | 16159     | 26359     | 47750     | 155458    | 53022     | 40418     | 62604     | 60009     | 84734     | 50105     | 38636     | 57585    | 64242    | 21457     | 21375     | 80758     | 43197    | 78066    | 21285    |
| EIC     | Negative | 273.1723 | 3.27 | unknown | 47891     | 37843     | 73809     | 45741     | 23841     | 62864     | 79667     | 64848     | 98374     | 53100     | 69105     | 92617    | 72966    | 42079     | 24669     | 42050     | 51170    | 68301    | 60416    |
| EIC     | Negative | 477.0439 | 1.25 | unknown | 131302    | 131678    | 131533    | 118222    | 96945     | 83351     | 91666     | 88697     | 87714     | 119531    | 92629     | 47783    | 70509    | 71417     | 84947     | 80352     | 60123    | 28950    | 81484    |
| EIC     | Negative | 319.1588 | 4.83 | unknown | 527185    | 265660    | 734990    | 1002990   | 464473    | 451791    | 588780    | 726606    | 346346    | 742231    | 312480    | 504993   | 535777   | 132588    | 207239    | 403826    | 406645   | 714292   | 199134   |
| fpHILIC | Negative | 87.0453  | 0.92 | unknown | 1090676   | 608632    | 1526227   | 1146657   | 751913    | 842169    | 663491    | 1026968   | 797540    | 728611    | 556074    | 759930   | 606613   | 545431    | 50507     | 643028    | 648366   | 668171   | 594273   |
| EIC     | Negative | 338.2702 | 6.38 | unknown | 544157    | 353646    | 613324    | 1940430   | 409697    | 362123    | 515873    | 620715    | 663017    | 446325    | 309257    | 533838   | 528092   | 173080    | 218038    | 574590    | 344124   | 589024   | 202053   |
| EIC     | Negative | 243.1421 | 4.24 | unknown | 200333    | 97196     | 194591    | 183268    | 115434    | 149724    | 129002    | 153267    | 70118     | 139379    | 99405     | 104569   | 71996    | 26954     | 78247     | 124054    | 35409    | 173438   | 51854    |
| fpHILIC | Negative | 280.2358 | 0.38 | unknown | 51006864  | 65372852  | 100794704 | 116234264 | 76634176  | 65694072  | 76400872  | 83825664  | 105224600 | 59180368  | 49059492  | 69248824 | 70039056 | 42264040  | 47442832  | 58727764  | 68102728 | 76332488 | 55239196 |
| fpHILIC | Negative | 152.0434 | 0.52 | unknown | 61112420  | 26959610  | 24602762  | 6764659   | 25413560  | 26704418  | 34651976  | 28531902  | 39216628  | 27982972  | 2945480   | 203175   | 8502363  | 17683856  | 18220174  | 58960812  | 38722144 | 8273880  | 26590532 |
| EIC     | Negative | 312.2264 | 5.98 | unknown | 509978    | 178627    | 674895    | 422710    | 301155    | 201750    | 357313    | 718918    | 113269    | 471457    | 2385950   | 202440   | 157353   | 139111    | 180325    | 150579    | 178923   | 588349   | 172479   |
| EIC     | Negative | 502.2845 | 5.13 | unknown | 6753310   | 9250428   | 6552233   | 0         | 8697547   | 0         | 7271668   | 0         | 0         | 6179720   | 0         | 0        | 0        | 0         | 0         | 0         | 5895318  | 0        | 6095034  |
| EIC     | Negative | 439.2965 | 6.12 | unknown | 1123177   | 999094    | 786534    | 1659243   | 849237    | 1074187   | 10330028  | 1013070   | 977710    | 875688    | 754811    | 531343   | 658933   | 772663    | 1241083   | 389523    | 1021582  | 507108   | 553653   |
| EIC     | Negative | 288.1616 | 2.64 | unknown | 482669    | 212299    | 488667    | 469744    | 364007    | 412207    | 606661    | 102325    | 414928    | 311165    | 205312    | 206333   | 157498   | 133430    | 112675    | 230508    | 560258   | 290018   |          |
| EIC     | Negative | 242.1841 | 3.07 | unknown | 668051    | 296479    | 835114    | 1387558   | 576344    | 564311    | 691824    | 605264    | 764669    | 465848    | 719913    | 635809   | 276577   | 238463    | 547956    | 407023    | 1002312  | 249093   |          |
| EIC     | Negative | 463.3071 | 2.46 | unknown | 2694739   | 223890    | 3977161   | 2131464   | 319959    | 576324    | 230894    | 5640208   | 340413    | 2674304   | 328972    | 330303   | 196156   | 340475    | 242923    | 185948    | 267375   | 4573014  | 184198   |
| EIC     | Negative | 449.3284 | 4.15 | unknown | 2108234   | 102523    | 1571228   | 642255    | 113456    | 85415     | 103031    | 62908     | 764498    | 847495    | 631823    | 91334    | 63866    | 76448     | 93452     | 54144     | 622639   | 646669   | 53046    |
| EIC     | Negative | 271.1746 | 5.90 | unknown | 224557    | 114159    | 212862    | 293060    | 84797     | 105929    | 82877     | 170757    | 150485    | 141905    | 93155     | 44990    | 66856    | 0         | 66780     | 135678    | 0        | 200901   | 44019    |
| EIC     | Negative | 287.2231 | 2.96 | unknown | 154745    | 154038    | 598520    | 2513971   | 656411    | 379669    | 596068    | 1227881   | 1068315   | 804619    | 331938    | 767765   | 870110   | 97637     | 109013    | 1052805   | 571601   | 1117016  | 105248   |
| EIC     | Negative | 480.3417 | 3.43 | unknown | 227011    | 184157    | 399309    | 5759525   | 649985    | 477540    | 691272    | 872683    | 1691739   | 985205    | 488414    | 1239721  | 938414   | 95100     | 100616    | 680854    | 626221   | 1795841  | 99410    |
| EIC     | Negative | 303.1574 | 4.59 | unknown | 67092     | 68302     | 140177    | 387686    | 105024    | 198447    | 131646    | 132892    | 102780    | 194020    | 48906     | 160183   | 134977   | 42393     | 41399     | 112366    | 86779    | 227814   | 0        |
| EIC     | Negative | 383.2912 | 5.63 | unknown | 317124    | 235843    | 429943    | 744944    | 340344    | 265248    | 310842    | 438256    | 438098    | 300339    | 206334    | 244845   | 343447   | 124257    | 205831    | 268869    | 279009   | 395112   | 201753   |
| fpHILIC | Negative | 111.0201 | 1.36 | unknown | 23259306  | 19039550  | 19305102  | 28579316  | 21154208  | 24109976  | 20827160  | 168332    |           |           |           |          |          |           |           |           |          |          |          |

|         |          |          |      |         |           |           |           |           |           |           |           |           |           |           |           |           |           |           |           |           |           |           |           |
|---------|----------|----------|------|---------|-----------|-----------|-----------|-----------|-----------|-----------|-----------|-----------|-----------|-----------|-----------|-----------|-----------|-----------|-----------|-----------|-----------|-----------|-----------|
| EIC     | Negative | 239.2015 | 6.30 | unknown | 1291484   | 1604605   | 2933354   | 3775831   | 2445302   | 1524247   | 1945382   | 2699773   | 2802199   | 1906016   | 1381659   | 1665410   | 2197511   | 1552419   | 735580    | 1645763   | 2114524   | 2627208   | 1573785   |
| fpHILIC | Negative | 279.2328 | 0.38 | unknown | 253796960 | 336813792 | 502389312 | 602385344 | 384532768 | 321965536 | 388183744 | 424285760 | 537096640 | 293701344 | 259603520 | 354625952 | 352635232 | 209661760 | 247406464 | 295808992 | 334460512 | 402334528 | 286287328 |
| fpHILIC | Negative | 321.1368 | 0.95 | unknown | 1153850   | 407959    | 904403    | 414251    | 438857    | 501151    | 347999    | 452980    | 516628    | 505331    | 246988    | 400051    | 310758    | 298717    | 347307    | 319921    | 234243    | 336135    | 254103    |
| EIC     | Negative | 271.2281 | 6.04 | unknown | 4735611   | 8946325   | 9836324   | 12960213  | 8554290   | 7446873   | 7573119   | 10935772  | 8355059   | 7597762   | 5245246   | 6156008   | 6107848   | 6312923   | 4430237   | 5435665   | 6270455   | 9676987   | 6854891   |
| EIC     | Negative | 526.2928 | 5.23 | unknown | 8684689   | 2914809   | 5814386   | 6485497   | 4951179   | 7124560   | 5381287   | 5400022   | 1449372   | 3836345   | 4388509   | 5978495   | 2320487   | 2740423   | 4973932   | 1422449   | 3420367   | 4408653   | 4424681   |
| EIC     | Negative | 111.2228 | 5.98 | unknown | 2544066   | 845076    | 3307989   | 2071803   | 1546017   | 930508    | 1759867   | 3610089   | 567904    | 2447630   | 1137777   | 1023887   | 836444    | 696208    | 851207    | 762396    | 929010    | 2963757   | 912887    |
| fpHILIC | Negative | 117.0043 | 0.57 | unknown | 800866    | 637568    | 1052395   | 871158    | 760869    | 861818    | 736391    | 881409    | 717989    | 975367    | 712562    | 967214    | 644779    | 507447    | 540777    | 685146    | 562107    | 625615    | 580525    |
| EIC     | Negative | 270.1795 | 3.19 | unknown | 93160     | 31631     | 68129     | 37516     | 47548     | 45336     | 52823     | 67360     | 19382     | 32823     | 25389     | 29158     | 30900     | 21656     | 41264     | 31923     | 32134     | 53393     | 19046     |
| EIC     | Negative | 429.3011 | 4.20 | unknown | 1674073   | 703860    | 1707542   | 1242469   | 656383    | 876636    | 650820    | 1584147   | 910773    | 970787    | 569782    | 639803    | 539354    | 965572    | 708815    | 523409    | 693155    | 1064888   | 558852    |
| EIC     | Negative | 391.2439 | 6.17 | unknown | 8921615   | 9767381   | 8988411   | 11933212  | 7121046   | 8646657   | 10209277  | 8607936   | 8611264   | 7794182   | 9249382   | 5612243   | 7078120   | 8725456   | 9821201   | 4143397   | 8408180   | 5086825   | 5691950   |
| EIC     | Negative | 304.0911 | 1.26 | unknown | 1209324   | 1241576   | 1579615   | 374704    | 1146838   | 1217188   | 1279715   | 1139018   | 893325    | 1115402   | 1177422   | 98313     | 547720    | 1059859   | 867920    | 1871796   | 290422    | 195016    | 1172722   |
| fpHILIC | Negative | 565.5183 | 0.37 | unknown | 255190    | 1417692   | 1597684   | 2344288   | 914897    | 894183    | 1218398   | 1055103   | 1501804   | 683482    | 276877    | 1206422   | 747038    | 472632    | 637129    | 1021019   | 739879    | 1226620   | 657720    |
| EIC     | Negative | 242.1842 | 2.97 | unknown | 244890    | 111360    | 353370    | 355793    | 210334    | 178543    | 173445    | 362534    | 179803    | 349662    | 148962    | 207830    | 144374    | 204569    | 71417     | 111777    | 169567    | 336828    | 157644    |
| EIC     | Negative | 323.1844 | 3.82 | unknown | 98362     | 143726    | 136436    | 539865    | 214720    | 144212    | 176975    | 186506    | 335697    | 254000    | 142937    | 199184    | 176495    | 79411     | 75247     | 158089    | 164288    | 329834    | 84486     |
| EIC     | Negative | 309.1341 | 1.58 | unknown | 541276    | 379735    | 307489    | 168998    | 256027    | 200227    | 253445    | 259880    | 125323    | 414648    | 159494    | 207227    | 188471    | 220503    | 181100    | 201686    | 131640    | 105094    | 220542    |
| EIC     | Negative | 508.3386 | 2.43 | unknown | 183775    | 87890     | 103318    | 179681    | 179681    | 291764    | 67441     | 136621    | 61403     | 198355    | 82795     | 136629    | 75750     | 84218     | 130636    | 80457     | 107649    | 173900    | 72814     |
| fpHILIC | Negative | 199.1708 | 0.40 | unknown | 4160819   | 4705679   | 9250367   | 12333026  | 6646800   | 4848846   | 5961417   | 8372530   | 9861151   | 5297360   | 3607596   | 4707981   | 6482524   | 3684080   | 3272900   | 5117215   | 5746645   | 6898587   | 4567012   |
| fpHILIC | Positive | 426.3571 | 0.54 | unknown | 5270700   | 3998937   | 5426003   | 9724309   | 4897880   | 5127436   | 6209160   | 4905671   | 927162    | 4807857   | 4752849   | 5419543   | 7032957   | 2032155   | 3646239   | 6650209   | 3718191   | 5348352   | 2955065   |
| EIC     | Negative | 556.4314 | 3.43 | unknown | 141603    | 96675     | 155181    | 580733    | 221099    | 160251    | 301256    | 215601    | 297999    | 130036    | 162608    | 253873    | 236829    | 86435     | 99979     | 234348    | 188977    | 309169    | 86336     |
| EIC     | Negative | 269.1716 | 3.19 | unknown | 480386    | 159506    | 390257    | 227397    | 340572    | 253399    | 243026    | 306977    | 98719     | 130036    | 134406    | 210727    | 172760    | 131597    | 198198    | 202391    | 170751    | 299113    | 122871    |
| EIC     | Negative | 263.1654 | 2.44 | unknown | 546553    | 232785    | 486839    | 319617    | 333318    | 313974    | 416766    | 443697    | 155375    | 384571    | 215049    | 214069    | 210350    | 202657    | 280720    | 184544    | 230218    | 382265    | 200646    |
| EIC     | Negative | 287.2016 | 6.08 | unknown | 312541    | 223545    | 370783    | 831294    | 364114    | 274358    | 464642    | 517451    | 395610    | 480077    | 264449    | 399095    | 373251    | 107284    | 177152    | 396260    | 287264    | 363249    | 166381    |
| EIC     | Negative | 495.3696 | 4.04 | unknown | 827841    | 475896    | 635519    | 690384    | 547015    | 666014    | 555265    | 778859    | 260685    | 515754    | 436046    | 340742    | 304501    | 277290    | 442409    | 381574    | 465115    | 565457    | 306135    |
| EIC     | Negative | 272.2314 | 6.04 | unknown | 813949    | 1590486   | 1758358   | 2203534   | 1513450   | 1732605   | 1332463   | 1998854   | 1470934   | 1312641   | 938611    | 1083881   | 1059102   | 1105659   | 763625    | 980630    | 1123135   | 1713151   | 1236420   |
| EIC     | Negative | 389.2464 | 6.17 | unknown | 26469405  | 28063694  | 26032210  | 34855007  | 20075796  | 25117169  | 29225674  | 26450041  | 25053159  | 22556924  | 26651464  | 16134804  | 20164686  | 25440308  | 28978529  | 12208757  | 24194902  | 14889202  | 16456705  |
| EIC     | Negative | 606.3783 | 5.74 | unknown | 30329745  | 35645786  | 39953925  | 45510681  | 30059228  | 48199109  | 34215516  | 29569444  | 17742987  | 2540007   | 30734925  | 27221914  | 23531058  | 22652029  | 24289890  | 18973357  | 25526500  | 22050954  | 29417013  |
| EIC     | Negative | 313.2387 | 2.36 | unknown | 108477    | 50718     | 72788     | 148388    | 63729     | 64932     | 68793     | 124236    | 91705     | 94178     | 38572     | 82767     | 67975     | 52904     | 31918     | 84437     | 59048     | 99122     | 44631     |
| EIC     | Negative | 305.1738 | 4.83 | unknown | 3175744   | 2150422   | 3848622   | 4524871   | 2679158   | 2614881   | 3328242   | 3752217   | 2345700   | 3573238   | 2215317   | 3526396   | 3444197   | 983167    | 1560983   | 1788991   | 2516115   | 3428006   | 1680588   |
| fpHILIC | Positive | 318.1904 | 2.51 | unknown | 715903    | 368218    | 684847    | 825873    | 511068    | 507790    | 651004    | 432580    | 818895    | 817357    | 450013    | 395511    | 599512    | 206132    | 625989    | 607202    | 323566    | 456189    | 245763    |
| EIC     | Negative | 325.2658 | 5.20 | unknown | 1137992   | 1069345   | 252019    | 211226    | 0         | 83108     | 1029646   | 1100449   | 1013395   | 209687    | 1069445   | 1026417   | 1068834   | 995147    | 1064554   | 189127    | 1029198   | 123652    | 0         |
| EIC     | Negative | 507.3334 | 2.43 | unknown | 568892    | 323476    | 399160    | 298395    | 527284    | 879555    | 200027    | 450333    | 198351    | 609154    | 305359    | 406141    | 221242    | 233972    | 433839    | 245762    | 316895    | 558834    | 190137    |
| EIC     | Negative | 300.2277 | 6.06 | unknown | 1531232   | 474419    | 1755891   | 1184483   | 778151    | 551933    | 820172    | 1761593   | 235995    | 1231510   | 635054    | 526763    | 507857    | 414766    | 545235    | 288721    | 513583    | 1230107   | 632438    |
| EIC     | Negative | 369.2278 | 2.96 | unknown | 39136     | 23943     | 64570     | 162555    | 65066     | 48701     | 74842     | 92177     | 84655     | 64177     | 44125     | 67011     | 84655     | 25731     | 14603     | 89369     | 66765     | 85916     | 193475    |
| EIC     | Negative | 305.0933 | 1.26 | unknown | 175972    | 192057    | 217199    | 82201     | 168674    | 182037    | 199034    | 147888    | 134904    | 179037    | 186277    | 16532     | 89356     | 170947    | 128124    | 291751    | 48693     | 0         | 175774    |
| EIC     | Negative | 361.2602 | 5.49 | unknown | 11857121  | 3907217   | 8736186   | 8718686   | 4569348   | 3832417   | 6636349   | 4636219   | 4013377   | 6387087   | 880662    | 3352009   | 4018000   | 6706681   | 78070078  | 5071418   | 2360946   | 2079219   | 0         |
| EIC     | Negative | 553.4128 | 3.44 | unknown | 22469     | 34568     | 89523     | 1174424   | 106838    | 75958     | 137552    | 222739    | 250266    | 152901    | 0         | 178422    | 144987    | 30390     | 0         | 152334    | 146376    | 315628    | 0         |
| EIC     | Negative | 347.2594 | 5.02 | unknown | 163871    | 95521     | 198843    | 522232    | 134403    | 142835    | 140522    | 187888    | 462277    | 123136    | 195331    | 136332    | 85819     | 91707     | 149245    | 108613    | 278429    | 60843     | 0         |
| fpHILIC | Negative | 202.0722 | 3.59 | unknown | 859852    | 546893    | 515709    | 534487    | 502557    | 946523    | 402496    | 162041    | 310886    | 462277    | 842954    | 329748    | 343251    | 297460    | 459371    | 361342    | 344101    | 217779    | 419673    |
| EIC     | Negative | 301.2030 | 2.52 | unknown | 492363    | 135863    | 498536    | 190547    | 498536    | 251787    | 260368    | 66410     | 611863    | 611863    | 129521    | 110687    | 133300    | 131947    | 82218     | 128952    | 454866    | 152647    | 0         |
| EIC     | Negative | 283.1921 | 2.43 | unknown | 1369418   | 454350    | 1248349   | 956593    | 707550    | 734883    | 861970    | 1449016   | 411124    | 1045033   | 471330    | 533690    | 493089    | 436257    | 525515    | 468688    | 476188    | 1380422   | 379279    |
| EIC     | Negative | 407.0050 | 1.26 | unknown | 384394    | 320673    | 347651    | 270791    | 253938    | 262974    | 239784    | 232011    | 239784    | 239784    | 234607    | 127360    | 204016    | 203228    | 194454    | 232025    | 163877    | 166281    | 207890    |
| EIC     | Negative | 604.3629 | 5.31 | unknown | 6346832   | 5850611   | 7696383   | 5033695   | 4817834   | 6213632   | 6570719   | 6352991   | 2614770   | 4917229   | 5279159   | 4684442   | 4445577   | 3912302   | 4261509   | 2977597   | 4822700   | 4028045   | 4527227   |
| EIC     | Negative | 239.1652 | 3.43 | unknown | 28096702  | 25116158  | 36278687  | 141320581 | 47522065  | 35841925  | 49662019  | 56314711  | 78795022  | 60403521  | 38144485  | 66553224  | 57454444  | 15147582  | 17336783  | 47945978  | 45733337  | 79023903  | 18104438  |
| EIC     | Negative | 323.1850 | 3.07 | unknown | 322414    | 178788    | 353514    | 651348    | 338671    | 326450    | 376968    | 459130    | 316784    | 395191    | 257244    | 504886    | 344640    | 173468    | 171497    | 304350    | 275654    | 510995    | 149152    |
| EIC     | Negative | 330.1794 | 1.78 | unknown | 875428    | 390033    | 825989    | 405919    | 219476    | 152613    | 380413    | 163725    | 362975    | 523399    | 243581    | 257308    | 234049    | 256383    | 220696    | 341756    | 279960    | 0         | 151086    |
| fpHILIC | Positive | 276.1432 | 3.07 | unknown | 2059296   | 1142071   | 1178493   | 1601884   | 1597891   | 1607325   | 1238590   | 819993    | 1213568   | 1165297   | 1233994   | 556613    | 571424    | 448409    | 1029754   | 964828    | 1235063   | 669326    | 1137260   |
| EIC     | Negative | 607.3816 | 5.74 | unknown | 10265892  | 12146918  | 11605992  | 84959152  | 10152198  | 14256099  | 11617444  | 10018946  | 6014195   | 7401256   | 10356836  | 9150479   | 7991831   | 7608813   | 8320524   | 6505744   | 8812590   | 6852878   | 10023462  |
| EIC     | Negative | 275.1427 | 3.43 | unknown | 172947    | 14        |           |           |           |           |           |           |           |           |           |           |           |           |           |           |           |           |           |

|         |          |          |      |         |           |           |           |           |           |           |           |           |           |           |           |           |           |          |           |           |           |           |           |
|---------|----------|----------|------|---------|-----------|-----------|-----------|-----------|-----------|-----------|-----------|-----------|-----------|-----------|-----------|-----------|-----------|----------|-----------|-----------|-----------|-----------|-----------|
| fpHILIC | Negative | 159.1027 | 0.46 | unknown | 1552329   | 1423470   | 1952618   | 4470849   | 1747495   | 1949784   | 1701601   | 1821703   | 2589104   | 1940717   | 1347516   | 1793194   | 1768703   | 985250   | 932679    | 1853257   | 1499330   | 2377687   | 1129939   |
| EIC     | Negative | 307.2053 | 4.14 | unknown | 203327    | 169259    | 488905    | 484868    | 294900    | 195122    | 243958    | 528285    | 308247    | 311243    | 170952    | 224149    | 223224    | 367399   | 157876    | 142450    | 280877    | 448248    | 218251    |
| EIC     | Negative | 434.0306 | 1.25 | unknown | 235839    | 227043    | 237169    | 224556    | 166696    | 153313    | 162260    | 219626    | 157129    | 189738    | 155461    | 82778     | 171115    | 132851   | 135183    | 142151    | 106474    | 148054    | 150816    |
| EIC     | Negative | 237.1494 | 2.96 | unknown | 168162    | 102954    | 184648    | 362014    | 137715    | 140354    | 172084    | 185307    | 186982    | 183686    | 118860    | 174623    | 156812    | 92068    | 93992     | 132901    | 130198    | 200562    | 96076     |
| EIC     | Negative | 335.1865 | 3.72 | unknown | 714873    | 231080    | 728947    | 519331    | 334442    | 409717    | 398902    | 743271    | 116105    | 493669    | 239722    | 313036    | 223823    | 152162   | 235858    | 217424    | 227600    | 685545    | 225316    |
| EIC     | Negative | 275.1269 | 3.07 | unknown | 367578    | 259967    | 290858    | 494141    | 363807    | 312394    | 386688    | 289311    | 248720    | 361195    | 290780    | 342289    | 312718    | 133472   | 248644    | 338377    | 272884    | 194610    | 133933    |
| EIC     | Negative | 273.2342 | 6.04 | unknown | 102689    | 178414    | 202976    | 249973    | 176791    | 156015    | 157976    | 209046    | 159560    | 143109    | 114100    | 132508    | 117135    | 143614   | 87596     | 119044    | 129869    | 273118    | 153268    |
| EIC     | Negative | 525.3431 | 2.23 | unknown | 394579    | 61977     | 612316    | 220201    | 103513    | 82074     | 71981     | 609063    | 89035     | 226522    | 47746     | 46539     | 28304     | 60676    | 55049     | 83926     | 64169     | 505449    | 51992     |
| fpHILIC | Negative | 179.0757 | 2.29 | unknown | 612686    | 309946    | 522364    | 466833    | 376614    | 474969    | 408982    | 486849    | 256831    | 70514     | 329316    | 324675    | 275633    | 306850   | 315668    | 274082    | 488497    | 210674    |           |
| EIC     | Negative | 253.1809 | 3.52 | unknown | 688462    | 408589    | 1282478   | 2931266   | 202452    | 215163    | 240308    | 474605    | 190356    | 1104835   | 295674    | 809552    | 336883    | 234091   | 149166    | 174307    | 132343    | 303578    | 294844    |
| fpHILIC | Negative | 178.0721 | 2.28 | unknown | 9159164   | 4383589   | 7423321   | 6472381   | 5259473   | 6924410   | 5498712   | 6448726   | 3415836   | 6358814   | 3646678   | 4426360   | 4035589   | 2677725  | 4028585   | 4277908   | 3969034   | 6724764   | 2962721   |
| EIC     | Negative | 550.3207 | 3.55 | unknown | 1988513   | 2378355   | 1918569   | 2137040   | 1936636   | 1940052   | 2229575   | 1727329   | 1603539   | 1706589   | 2060420   | 2198289   | 1928652   | 1973971  | 2009273   | 1750661   | 1745181   | 267576    | 1751879   |
| EIC     | Negative | 252.2048 | 5.80 | unknown | 66990     | 75358     | 135625    | 270588    | 123721    | 92874     | 105992    | 140861    | 139168    | 89364     | 67706     | 115222    | 117172    | 58045    | 50583     | 76540     | 110889    | 159009    | 83581     |
| EIC     | Negative | 291.1220 | 3.36 | unknown | 403096    | 238355    | 290261    | 650549    | 300681    | 373075    | 370874    | 562358    | 225677    | 204973    | 228293    | 411611    | 454689    | 138821   | 281048    | 258243    | 186731    | 581475    | 154130    |
| EIC     | Negative | 299.2240 | 6.06 | unknown | 8107041   | 2606973   | 9318454   | 6437823   | 4083662   | 2741212   | 4043261   | 9761348   | 1216866   | 6777465   | 3491364   | 2812332   | 2692497   | 2200280  | 2894312   | 1614638   | 2839532   | 6586498   | 3503161   |
| fpHILIC | Positive | 132.0654 | 1.76 | unknown | 1756934   | 841190    | 855510    | 1642424   | 1115388   | 1277144   | 934497    | 912132    | 1016773   | 1281959   | 1208325   | 1276118   | 996609    | 0        | 821555    | 1035267   | 680089    | 916654    | 742284    |
| fpHILIC | Negative | 101.0608 | 0.61 | unknown | 14560357  | 4010825   | 12756654  | 8122239   | 2454743   | 8715102   | 2104053   | 9375632   | 7715956   | 4638486   | 5114392   | 4502097   | 4056900   | 5520849  | 5340449   | 3291441   | 5393452   | 4518888   | 5157558   |
| EIC     | Negative | 389.2910 | 6.39 | unknown | 100402104 | 37037716  | 70601856  | 0         | 29641972  | 51374132  | 33808212  | 33114106  | 0         | 59229984  | 45929294  | 41647916  | 0         | 62881492 | 54069252  | 0         | 3855592   | 0         | 24734394  |
| fpHILIC | Positive | 147.1202 | 2.96 | unknown | 2088916   | 1279101   | 1722420   | 2213526   | 1003602   | 1168451   | 1139365   | 1328192   | 1195042   | 1090251   | 1290400   | 1158861   | 1138157   | 861237   | 888926    | 1036348   | 954294    | 1171359   | 609277    |
| EIC     | Negative | 249.1860 | 3.36 | unknown | 461824    | 135356    | 340893    | 290885    | 181736    | 193032    | 204223    | 329886    | 159481    | 301688    | 195450    | 135458    | 107410    | 155354   | 130034    | 152085    | 338637    | 97818     |           |
| EIC     | Negative | 505.3515 | 4.08 | unknown | 509963    | 400015    | 793815    | 526344    | 1400295   | 854968    | 1641754   | 1496346   | 2874374   | 2079756   | 1155590   | 2266212   | 2135097   | 140444   | 313088    | 1555059   | 1534680   | 2980214   | 230768    |
| EIC     | Negative | 353.2699 | 6.52 | unknown | 719529    | 539217    | 1189209   | 2016676   | 856849    | 613911    | 954892    | 1202744   | 574703    | 807234    | 626241    | 626241    | 575554    | 571444   | 576621    | 661725    | 656802    | 820025    | 582586    |
| fpHILIC | Positive | 298.1137 | 2.15 | unknown | 1019994   | 479634    | 571051    | 875828    | 578461    | 986178    | 691728    | 456432    | 671631    | 624205    | 651000    | 720273    | 681035    | 396379   | 546506    | 727355    | 491251    | 542043    | 402046    |
| EIC     | Negative | 262.2639 | 5.49 | unknown | 2479974   | 867082    | 1872867   | 1811864   | 956455    | 782975    | 1418345   | 961364    | 860228    | 1347178   | 1247884   | 692351    | 819396    | 1489764  | 1725325   | 213885    | 11801423  | 494386    | 471971    |
| EIC     | Negative | 299.1650 | 3.24 | unknown | 333438    | 357660    | 417790    | 305636    | 114039    | 217935    | 197997    | 137012    | 127344    | 115800    | 185652    | 278845    | 124229    | 36626    | 160692    | 192365    | 102190    | 100318    | 85055     |
| EIC     | Negative | 284.1954 | 3.56 | unknown | 491793    | 196649    | 427169    | 315925    | 295642    | 281379    | 357387    | 493734    | 126556    | 344704    | 180211    | 284126    | 216329    | 193073   | 234210    | 225613    | 222200    | 403706    | 159402    |
| EIC     | Negative | 496.3732 | 4.04 | unknown | 242142    | 161524    | 199367    | 229685    | 154943    | 206717    | 166976    | 244498    | 89592     | 184135    | 155116    | 90715     | 83763     | 98524    | 128051    | 116408    | 165882    | 189230    | 88461     |
| EIC     | Negative | 605.3351 | 3.04 | unknown | 289130    | 50121     | 387255    | 239078    | 80662     | 57543     | 89042     | 196947    | 91651     | 213867    | 51507     | 43823     | 53246     | 130490   | 77797     | 45117     | 59658     | 307172    | 56736     |
| EIC     | Negative | 294.2156 | 3.98 | unknown | 67447     | 34977     | 122431    | 434716    | 100616    | 69221     | 72594     | 205476    | 125064    | 119252    | 70149     | 111688    | 110247    | 54751    | 30886     | 93869     | 83573     | 208748    | 42342     |
| fpHILIC | Negative | 115.0401 | 0.57 | unknown | 136700448 | 119156136 | 158913376 | 165116112 | 121298592 | 153127968 | 149396880 | 142838592 | 145474176 | 146566608 | 148512864 | 173978720 | 182081444 | 81449856 | 101780800 | 121912136 | 110292504 | 134556048 | 102468256 |
| EIC     | Negative | 276.1278 | 3.33 | unknown | 130829    | 102498    | 0         | 110619    | 98932     | 100997    | 98350     | 0         | 29249     | 0         | 0         | 0         | 98365     | 11703    | 98354     | 108829    | 55499     | 0         | 0         |
| EIC     | Negative | 237.1495 | 3.01 | unknown | 248699    | 128667    | 201406    | 300223    | 174467    | 197553    | 193515    | 187838    | 158181    | 185286    | 127699    | 170859    | 150431    | 89104    | 138227    | 155050    | 130109    | 213785    | 93081     |
| fpHILIC | Negative | 268.2361 | 0.38 | unknown | 589550    | 755272    | 1375105   | 1617879   | 889190    | 698638    | 929172    | 1298880   | 815862    | 572330    | 727229    | 1200883   | 580796    | 375933   | 959268    | 906290    | 813812    | 709218    | 797818    |
| fpHILIC | Negative | 167.1078 | 0.43 | unknown | 1205889   | 586381    | 1029923   | 1406264   | 854134    | 683388    | 760094    | 793691    | 877064    | 924242    | 659806    | 939342    | 874173    | 437804   | 437024    | 616824    | 693941    | 888858    | 547100    |
| EIC     | Negative | 439.3071 | 6.35 | unknown | 2155618   | 2859861   | 2979868   | 2309789   | 1529421   | 3060131   | 2287794   | 2897219   | 1581045   | 1881877   | 2717701   | 1100289   | 1624602   | 2486434  | 2374216   | 912541    | 2242670   | 1575912   | 2026320   |
| EIC     | Negative | 258.1503 | 3.69 | unknown | 194527    | 94880     | 197582    | 194097    | 135091    | 107529    | 124844    | 201554    | 113488    | 163438    | 97638     | 90358     | 78549     | 78553    | 105375    | 112415    | 87111     | 162548    | 80401     |
| EIC     | Negative | 480.2999 | 4.84 | unknown | 1137421   | 0         | 0         | 0         | 0         | 0         | 1289559   | 0         | 0         | 0         | 0         | 0         | 0         | 0        | 0         | 0         | 0         | 1035424   | 0         |
| EIC     | Negative | 294.2157 | 5.02 | unknown | 417377    | 475778    | 446293    | 1043096   | 606762    | 580662    | 732331    | 685375    | 790394    | 590374    | 473371    | 776991    | 638765    | 334236   | 413198    | 619110    | 496930    | 882482    | 316936    |
| EIC     | Negative | 295.2277 | 6.22 | unknown | 463700    | 485088    | 620751    | 1044498   | 590542    | 433694    | 468101    | 576351    | 698590    | 454325    | 392140    | 496333    | 446504    | 250118   | 357689    | 434085    | 666160    | 342700    |           |
| EIC     | Negative | 447.4915 | 6.36 | unknown | 1475341   | 1103635   | 1607635   | 166392    | 1055105   | 862671    | 968037    | 652506    | 534715    | 920225    | 673756    | 628669    | 494388    | 465984   | 387828    | 745341    | 607423    | 750259    | 785947    |
| fpHILIC | Negative | 275.1082 | 3.86 | unknown | 541205    | 235200    | 362697    | 406864    | 265584    | 340408    | 280502    | 290420    | 247348    | 518122    | 302684    | 181159    | 263994    | 142229   | 337755    | 142299    | 185574    | 221995    | 186600    |
| EIC     | Negative | 530.3582 | 2.92 | unknown | 130381    | 45340     | 289191    | 789274    | 131922    | 44959     | 188299    | 124949    | 214897    | 314288    | 113670    | 202684    | 164392    | 0        | 187805    | 150681    | 229161    | 0         |           |
| EIC     | Negative | 238.1529 | 2.37 | unknown | 802100    | 405374    | 719164    | 687835    | 450572    | 429263    | 528758    | 329042    | 0         | 746677    | 366848    | 445480    | 394068    | 353186   | 406221    | 356683    | 328075    | 599699    | 348547    |
| EIC     | Negative | 298.1849 | 5.49 | unknown | 382731    | 162350    | 445766    | 261255    | 156457    | 0         | 193395    | 128785    | 0         | 181094    | 165092    | 0         | 0         | 157148   | 0         | 0         | 0         | 228329    | 0         |
| EIC     | Negative | 329.1761 | 1.78 | unknown | 3810595   | 1737842   | 3613495   | 1668327   | 984743    | 675255    | 1714254   | 619718    | 1575153   | 2441666   | 1115582   | 1140060   | 1036008   | 1195551  | 1005219   | 1506542   | 1261594   | 0         | 713862    |
| EIC     | Negative | 310.1745 | 3.09 | unknown | 583539    | 159801    | 400560    | 191425    | 281931    | 199559    | 346622    | 469516    | 101713    | 295560    | 126650    | 159937    | 124595    | 123057   | 226774    | 197367    | 172595    | 426910    | 104287    |
| EIC     | Negative | 269.1370 | 2.34 | unknown | 476665    | 239395    | 511548    | 1566398   | 511548    | 226133    | 262402    | 809728    | 396075    | 735766    | 158466    | 229400    | 275764    | 114738   | 113862    | 233342    | 186015    | 939188    | 158041    |
| fpHILIC | Positive | 267.0574 | 2.66 | unknown | 951409    | 881091    | 966345    | 1643764   | 1010284   | 1262583   | 952660    | 1031864   | 1200229   | 1079550   | 1075281   | 1067615   | 976324    | 607059   | 892531    | 1061018   | 994921    | 697142    | 757354    |
| EIC     | Negative | 244.1896 | 4.08 | unknown | 61309     | 40505     | 81324     | 236418    | 79882     | 68177     | 95276     | 91087     | 131418    | 11        |           |           |           |          |           |           |           |           |           |

|         |          |          |      |         |           |          |           |           |          |          |           |          |           |          |          |          |          |          |          |          |           |          |          |
|---------|----------|----------|------|---------|-----------|----------|-----------|-----------|----------|----------|-----------|----------|-----------|----------|----------|----------|----------|----------|----------|----------|-----------|----------|----------|
| EIC     | Negative | 409.2970 | 6.18 | unknown | 659789    | 477658   | 697185    | 788828    | 727029   | 351934   | 442703    | 580554   | 429688    | 626469   | 405558   | 366188   | 368447   | 462748   | 471161   | 449572   | 358986    | 417613   | 366890   |
| EIC     | Negative | 254.1481 | 2.89 | unknown | 555159    | 149713   | 353210    | 226046    | 164975   | 202535   | 226968    | 255297   | 111516    | 344465   | 113646   | 188694   | 134413   | 159155   | 166722   | 100300   | 112018    | 270975   | 133876   |
| EIC     | Negative | 336.0378 | 0.55 | unknown | 346800    | 157381   | 146853    | 456670    | 110951   | 106253   | 238044    | 126949   | 112913    | 148591   | 196141   | 268413   | 169678   | 119285   | 138821   | 129807   | 114107    | 177041   | 128730   |
| fpHILIC | Negative | 156.0455 | 0.96 | unknown | 2452923   | 9078809  | 8808009   | 3470334   | 2819608  | 4445902  | 2347839   | 2887544  | 2513912   | 5419332  | 4556717  | 2461789  | 2672119  | 3856049  | 2757595  | 3245234  | 2033733   | 2811129  | 1398774  |
| EIC     | Negative | 284.1955 | 2.43 | unknown | 249971    | 82456    | 180862    | 126792    | 128792   | 140928   | 139283    | 265769   | 68517     | 119323   | 776517   | 91712    | 83634    | 66594    | 91389    | 78841    | 89798     | 271899   | 79456    |
| EIC     | Negative | 463.3423 | 4.00 | unknown | 546488    | 0        | 315016    | 71368     | 0        | 0        | 0         | 118143   | 0         | 61340    | 0        | 0        | 0        | 0        | 0        | 0        | 0         | 96467    | 0        |
| EIC     | Negative | 251.1289 | 2.55 | unknown | 1629874   | 726213   | 984011    | 650111    | 713909   | 685580   | 885199    | 1109477  | 465120    | 882996   | 571086   | 502685   | 557331   | 462091   | 497842   | 609370   | 510846    | 1023226  | 509997   |
| EIC     | Negative | 498.2901 | 2.62 | unknown | 351632538 | 2939172  | 578220678 | 343794427 | 0        | 0        | 473261571 | 19366122 | 287936582 | 6494129  | 7558728  | 12712107 | 0        | 9903433  | 4993071  | 7478349  | 373459006 | 6627883  | 6627883  |
| EIC     | Negative | 376.2788 | 6.13 | unknown | 345415    | 146790   | 175794    | 280996    | 140802   | 119088   | 185730    | 111126   | 150153    | 121874   | 123915   | 105074   | 133119   | 137300   | 167385   | 88165    | 124595    | 103457   | 93996    |
| EIC     | Negative | 538.3219 | 3.00 | unknown | 85056     | 0        | 270949    | 174641    | 0        | 0        | 0         | 484106   | 0         | 94239    | 0        | 0        | 0        | 16694    | 23438    | 0        | 0         | 372420   | 0        |
| fpHILIC | Positive | 400.3415 | 0.56 | unknown | 3704165   | 2484644  | 3622390   | 6003168   | 3100800  | 2944898  | 3347512   | 3298396  | 5027791   | 3206571  | 3210918  | 3604104  | 3749112  | 1592937  | 2390828  | 4123141  | 2494704   | 3409480  | 2075297  |
| EIC     | Negative | 271.2281 | 4.14 | unknown | 20483139  | 17188090 | 46267782  | 52608585  | 29540404 | 19578419 | 24830462  | 51674028 | 31870785  | 31525479 | 18419657 | 20491870 | 21335665 | 36995595 | 13914362 | 15902611 | 27298287  | 47980153 | 23786252 |
| fpHILIC | Negative | 169.0771 | 0.97 | unknown | 380975    | 925663   | 1023395   | 385273    | 287505   | 507395   | 233644    | 258569   | 292066    | 600515   | 416998   | 253601   | 296700   | 391928   | 300990   | 344217   | 238489    | 266608   | 142316   |
| EIC     | Negative | 284.1954 | 3.79 | unknown | 224890    | 67165    | 179048    | 126477    | 106348   | 108556   | 129777    | 218920   | 57012     | 155448   | 60092    | 98862    | 70628    | 76221    | 103966   | 58697    | 81944     | 190913   | 72526    |
| EIC     | Negative | 306.1770 | 4.83 | unknown | 561809    | 390561   | 664956    | 825683    | 461125   | 465243   | 593461    | 644819   | 402541    | 642970   | 359096   | 662048   | 596017   | 188568   | 328749   | 386665   | 468622    | 637016   | 280802   |
| EIC     | Negative | 306.1769 | 2.36 | unknown | 206149    | 113888   | 223821    | 191430    | 10159    | 17907    | 130006    | 136130   | 67007     | 115631   | 11221    | 84111    | 160060   | 49818    | 16171    | 67007    | 45048     | 9377     | 133339   |
| EIC     | Negative | 242.1841 | 3.20 | unknown | 354876    | 193464   | 567195    | 606998    | 276282   | 345705   | 293774    | 417854   | 318111    | 452176   | 248928   | 395875   | 330883   | 396033   | 157920   | 205604   | 284443    | 465947   | 238828   |
| fpHILIC | Negative | 325.0451 | 0.98 | unknown | 320068    | 593445   | 546332    | 1033926   | 901172   | 0        | 712038    | 712038   | 814804    | 851273   | 363032   | 898286   | 1427942  | 891118   | 235873   | 479816   | 443656    | 737415   | 315848   |
| fpHILIC | Positive | 586.2732 | 0.38 | unknown | 2768523   | 2669585  | 4771065   | 4868651   | 2254595  | 1701946  | 2185452   | 3547785  | 1910860   | 4319211  | 3085957  | 2485191  | 2980788  | 921793   | 1141731  | 2382435  | 1320767   | 3683629  | 976339   |
| EIC     | Negative | 608.3945 | 6.34 | unknown | 8822702   | 6713557  | 6877630   | 4963168   | 5222408  | 8494497  | 7820309   | 6158472  | 4351614   | 5175794  | 5300742  | 6147382  | 5491099  | 5059835  | 6555154  | 4663569  | 4701749   | 4531590  | 5818008  |
| fpHILIC | Positive | 239.1640 | 0.45 | unknown | 804584    | 435388   | 919209    | 961815    | 674938   | 547816   | 770522    | 785211   | 425452    | 803418   | 488632   | 583025   | 652196   | 304713   | 444790   | 552244   | 415333    | 731905   | 479552   |
| EIC     | Negative | 283.1920 | 3.56 | unknown | 2825429   | 1084147  | 2516308   | 1736024   | 1637958  | 1596511  | 1987343   | 2654126  | 708877    | 1912832  | 1011525  | 1522473  | 1268515  | 1107477  | 1302199  | 1223337  | 1286848   | 2304669  | 922339   |
| EIC     | Negative | 502.2947 | 5.24 | unknown | 1141150   | 945996   | 942091    | 701180    | 1095803  | 1193164  | 858872    | 924335   | 462155    | 628826   | 653466   | 618070   | 513674   | 899023   | 817888   | 351803   | 774283    | 833152   | 941869   |
| EIC     | Negative | 271.0929 | 0.55 | unknown | 290565    | 74413    | 101050    | 139904    | 59221    | 201311   | 87937     | 0        | 28707     | 178740   | 182055   | 185741   | 167162   | 219030   | 143750   | 144466   | 208824    | 705421   | 193360   |
| fpHILIC | Negative | 110.9758 | 2.96 | unknown | 559082    | 191892   | 1154513   | 449197    | 282699   | 233574   | 262266    | 743088   | 197969    | 718740   | 182055   | 185741   | 167162   | 219030   | 143750   | 144466   | 208824    | 705421   | 193360   |
| EIC     | Negative | 281.1763 | 3.22 | unknown | 5330127   | 1694294  | 3873392   | 2424362   | 2825713  | 2759169  | 3688781   | 4317230  | 678073    | 3226671  | 1666228  | 2149887  | 1676265  | 1741127  | 2493310  | 1725374  | 2242988   | 3834868  | 1461167  |
| EIC     | Negative | 240.2048 | 6.35 | unknown | 160569    | 147746   | 409506    | 371416    | 223847   | 140373   | 186411    | 275468   | 255933    | 212367   | 138096   | 195155   | 212762   | 200516   | 45732    | 204690   | 226582    | 227327   | 183867   |
| fpHILIC | Negative | 270.2519 | 0.37 | unknown | 993410    | 988294   | 1517687   | 1666489   | 1010472  | 1294105  | 1138165   | 1293452  | 1430236   | 997003   | 796227   | 1217705  | 1144643  | 1009123  | 835116   | 1006770  | 1104447   | 981123   | 1135073  |
| EIC     | Negative | 412.2790 | 5.73 | unknown | 431021    | 321065   | 413049    | 1277219   | 175478   | 188783   | 325448    | 541608   | 29425     | 426412   | 417373   | 167190   | 370113   | 485951   | 432611   | 62951    | 398660    | 216036   | 141545   |
| EIC     | Negative | 269.1761 | 3.34 | unknown | 569916    | 370470   | 422891    | 310575    | 309858   | 421298   | 338851    | 253556   | 545836    | 364726   | 264236   | 425800   | 484993   | 374873   | 339367   | 462688   | 335186    | 250831   | 146923   |
| fpHILIC | Positive | 113.0539 | 2.22 | unknown | 553227    | 358170   | 461411    | 575238    | 348530   | 554438   | 343732    | 464338   | 504860    | 493581   | 413300   | 452584   | 456162   | 405275   | 336703   | 423178   | 324454    | 377876   | 358366   |
| fpHILIC | Positive | 548.3698 | 0.54 | unknown | 3932834   | 3349640  | 4289689   | 3151042   | 3320290  | 4275461  | 3667317   | 3491179  | 2134572   | 8202715  | 3218449  | 2992491  | 2591387  | 2648721  | 2708827  | 2116701  | 3085475   | 2786307  | 3187772  |
| EIC     | Negative | 268.2002 | 3.56 | unknown | 365563    | 195592   | 665419    | 608809    | 277287   | 295165   | 227458    | 559469   | 218369    | 1521057  | 218263   | 251919   | 185582   | 469497   | 98413    | 103465   | 237672    | 582278   | 274950   |
| EIC     | Negative | 241.1809 | 4.08 | unknown | 33809135  | 28855861 | 43697679  | 157642868 | 58655283 | 44713267 | 67818167  | 62672064 | 95933225  | 76524529 | 53851357 | 81419807 | 77506030 | 16518569 | 24761770 | 65180040 | 62320859  | 98084084 | 20901473 |
| EIC     | Negative | 484.3734 | 4.08 | unknown | 257058    | 210392   | 528006    | 6183181   | 852658   | 468164   | 1223381   | 1002400  | 2294361   | 1423005  | 740033   | 1198225  | 1543668  | 84471    | 149289   | 1081085  | 1015004   | 2452700  | 107048   |
| EIC     | Negative | 322.2477 | 6.22 | unknown | 301270    | 132605   | 335663    | 537044    | 216312   | 197094   | 122502    | 299039   | 193248    | 330602   | 144229   | 190512   | 166624   | 96527    | 93030    | 152548   | 131472    | 352151   | 116983   |
| EIC     | Negative | 328.0002 | 1.25 | unknown | 613735    | 578484   | 675605    | 407240    | 592867   | 631735   | 614572    | 508989   | 571948    | 591649   | 602270   | 244741   | 508136   | 598652   | 576720   | 697226   | 395973    | 219432   | 574255   |
| fpHILIC | Positive | 440.2058 | 3.12 | unknown | 472972    | 182353   | 189470    | 547286    | 221220   | 578852   | 163000    | 121690   | 204102    | 245629   | 226643   | 225137   | 274205   | 68872    | 171936   | 289203   | 244391    | 169353   | 186778   |
| EIC     | Negative | 479.3374 | 3.30 | unknown | 749146    | 54844    | 86503     | 382187    | 0        | 522512   | 0         | 0        | 42023     | 0        | 0        | 0        | 0        | 42023    | 0        | 0        | 0         | 501746   | 0        |
| EIC     | Negative | 445.2958 | 2.86 | unknown | 946523    | 397412   | 763292    | 715982    | 392971   | 451735   | 437761    | 869997   | 507351    | 711776   | 345709   | 381838   | 312171   | 660245   | 424968   | 255030   | 391522    | 794902   | 325478   |
| EIC     | Negative | 269.0878 | 0.65 | unknown | 519225    | 171510   | 215232    | 664465    | 86981    | 482040   | 250329    | 114557   | 120448    | 127295   | 245853   | 296808   | 216564   | 44486    | 136931   | 213574   | 122044    | 209611   | 150488   |
| EIC     | Negative | 419.3165 | 3.07 | unknown | 272293    | 0        | 214921    | 65197     | 12056    | 11409    | 12085     | 279571   | 12096     | 70999    | 0        | 0        | 12082    | 9087     | 0        | 0        | 9438      | 251216   | 0        |
| EIC     | Negative | 581.0430 | 0.55 | unknown | 548629    | 496484   | 318631    | 1105424   | 242623   | 761788   | 586854    | 384042   | 244419    | 265167   | 543211   | 733004   | 486302   | 135578   | 378731   | 460428   | 337315    | 400740   | 253008   |
| fpHILIC | Positive | 232.1399 | 3.97 | unknown | 665697    | 512802   | 384137    | 675226    | 456151   | 664947   | 399466    | 372999   | 413855    | 436840   | 418094   | 445712   | 511791   | 340803   | 395231   | 362705   | 403115    | 291698   | 449830   |
| EIC     | Negative | 283.1939 | 3.63 | unknown | 1384541   | 417067   | 1121111   | 866119    | 646738   | 700952   | 774172    | 1160349  | 280733    | 911185   | 369150   | 606960   | 450023   | 452159   | 542289   | 463377   | 484957    | 1055023  | 392603   |
| EIC     | Negative | 277.1808 | 2.85 | unknown | 4889033   | 10601614 | 10828848  | 8134771   | 5548163  | 7773199  | 5889559   | 7677415  | 3351593   | 10288534 | 9886657  | 6271581  | 3206144  | 2744899  | 5101374  | 4602285  | 5596768   | 8111170  | 1532759  |
| EIC     | Negative | 354.2347 | 4.14 | unknown | 295011    | 250176   | 548532    | 321791    | 631175   | 445443   | 321791    | 631175   | 445443    | 4998254  | 248524   | 241362   | 246177   | 482579   | 199846   | 198479   | 359805    | 630252   | 328363   |
| EIC     | Negative | 299.2591 | 4.63 | unknown | 0         | 325435   | 848726    | 1110471   | 587216   | 0        | 520390    | 0        | 524520    | 0        | 0        | 0        | 0        | 0        | 380319   | 0        | 0         | 966875   | 0        |
| EIC     | Negative | 505.0078 | 0.55 | unknown | 256973    | 63267    | 52204     | 158842    | 0        | 222345   | 72435     | 0        | 45938     | 71142    | 99259    | 60600    | 0        | 62256</  |          |          |           |          |          |

|         |          |          |      |         |           |          |           |           |          |          |           |          |          |          |          |          |          |          |          |           |          |          |         |
|---------|----------|----------|------|---------|-----------|----------|-----------|-----------|----------|----------|-----------|----------|----------|----------|----------|----------|----------|----------|----------|-----------|----------|----------|---------|
| EIC     | Negative | 407.2928 | 5.10 | unknown | 2434356   | 246145   | 519508    | 982252    | 363621   | 196858   | 298304    | 428281   | 420919   | 421815   | 216820   | 293058   | 284806   | 192867   | 233049   | 264331    | 271717   | 520673   | 132194  |
| EIC     | Negative | 309.1710 | 2.85 | unknown | 10594785  | 21912611 | 24222740  | 17471736  | 12372544 | 16688764 | 12892448  | 16281796 | 7721092  | 22924449 | 20747721 | 13606738 | 7514712  | 6632260  | 11343385 | 10136016  | 12021042 | 16910460 | 4574816 |
| EIC     | Negative | 320.2314 | 5.66 | unknown | 184279    | 163188   | 207946    | 643805    | 223828   | 219699   | 231216    | 317049   | 389463   | 256151   | 177095   | 295513   | 98574    | 98574    | 157095   | 267582    | 205531   | 390655   | 130726  |
| fpHILIC | Positive | 127.0979 | 5.42 | unknown | 3814637   | 3575607  | 2296300   | 2489268   | 2838797  | 3635705  | 3338285   | 2220289  | 2708181  | 1786617  | 2271663  | 2461375  | 2657415  | 2571175  | 4330420  | 2635091   | 1478353  | 1679615  | 2167648 |
| fpHILIC | Negative | 298.1419 | 3.48 | unknown | 1750416   | 1297062  | 1648930   | 1776570   | 1627901  | 1733526  | 1414783   | 1727261  | 1273643  | 1744138  | 1681913  | 1719262  | 1736758  | 1267117  | 1538133  | 1552561   | 1669494  | 1724749  | 0       |
| EIC     | Negative | 377.2329 | 5.53 | unknown | 261518    | 285246   | 394674    | 851413    | 473217   | 332229   | 395592    | 395146   | 546405   | 521915   | 310826   | 485014   | 458477   | 175838   | 205191   | 300054    | 426762   | 628269   | 225811  |
| EIC     | Negative | 241.1808 | 3.20 | unknown | 2369471   | 1205752  | 3579957   | 3836356   | 1802617  | 1962798  | 1802609   | 2740905  | 2015711  | 2835198  | 1630621  | 2505937  | 2052693  | 2522212  | 990185   | 1331738   | 1653576  | 2864884  | 1575374 |
| EIC     | Negative | 233.0424 | 1.25 | unknown | 192754    | 173511   | 157219    | 149794    | 168743   | 173735   | 184339    | 149600   | 157729   | 175284   | 192612   | 106756   | 158515   | 153183   | 164826   | 175930    | 148958   | 32863    | 173624  |
| fpHILIC | Positive | 585.2701 | 0.37 | unknown | 7647882   | 7241932  | 13204343  | 13777293  | 5946069  | 4896655  | 6067090   | 9729743  | 5517474  | 11709050 | 8801712  | 6898748  | 8090993  | 705250   | 3044603  | 6649715   | 3601867  | 10785249 | 2763524 |
| EIC     | Negative | 239.1652 | 2.91 | unknown | 3833906   | 2511479  | 2510949   | 6087932   | 1996612  | 4931816  | 2419888   | 1970986  | 1028441  | 2720491  | 2169664  | 4387048  | 4476897  | 2401268  | 2824018  | 1660312   | 1922850  | 2294394  | 1607812 |
| EIC     | Negative | 506.3264 | 6.39 | unknown | 2661141   | 3070283  | 2625516   | 2099542   | 2053632  | 3051310  | 1950617   | 2222630  | 1254871  | 1472546  | 1303353  | 1810528  | 975198   | 1744093  | 1397006  | 1503886   | 1187281  | 1800857  | 2906315 |
| EIC     | Negative | 311.1772 | 2.85 | unknown | 431869    | 617307   | 613289    | 470748    | 380212   | 478513   | 366823    | 489028   | 195942   | 643132   | 564690   | 390978   | 227751   | 193073   | 311244   | 263537    | 360700   | 500449   | 160179  |
| EIC     | Negative | 355.0106 | 1.19 | unknown | 73059     | 68705    | 54211     | 44104     | 50499    | 52703    | 48809     | 46536    | 47346    | 57670    | 42695    | 40725    | 42187    | 35193    | 40452    | 33239     | 33569    | 61025    | 37114   |
| EIC     | Negative | 449.3281 | 3.74 | unknown | 4709887   | 616122   | 8491566   | 1370123   | 792086   | 441779   | 426406    | 2541227  | 584314   | 2140249  | 366771   | 307422   | 238213   | 461736   | 363654   | 404541    | 410324   | 2445461  | 376166  |
| EIC     | Negative | 295.2279 | 5.53 | unknown | 4026258   | 4687660  | 6145499   | 14975376  | 7826284  | 5274498  | 6434875   | 6537885  | 8354439  | 7517605  | 4772889  | 7605876  | 6316591  | 2995725  | 3354541  | 4784174   | 6294927  | 10573599 | 3801499 |
| EIC     | Negative | 337.2137 | 5.49 | unknown | 1068524   | 338845   | 750237    | 829993    | 421357   | 320075   | 528230    | 423929   | 406284   | 647446   | 529485   | 296014   | 401365   | 609795   | 741074   | 812074    | 476637   | 276623   | 180297  |
| fpHILIC | Positive | 510.3555 | 0.59 | unknown | 4791543   | 5345612  | 4348803   | 4676826   | 5232834  | 5615582  | 4771569   | 4593423  | 3603735  | 4088493  | 4559877  | 4679246  | 4672960  | 4266631  | 5181100  | 4939741   | 4693457  | 5108428  | 0       |
| EIC     | Negative | 499.2932 | 2.60 | unknown | 104379958 | 890169   | 174039083 | 102404763 | 33069    | 12548    | 140533913 | 0        | 86062794 | 1978188  | 2230345  | 0        | 3057384  | 1540970  | 0        | 111478449 | 1592474  | 0        |         |
| EIC     | Negative | 445.3329 | 4.06 | unknown | 132067    | 12725    | 315145    | 84037     | 0        | 84037    | 0         | 146393   | 0        | 126721   | 17793    | 20763    | 0        | 12899    | 13309    | 0         | 81157    | 15196    | 0       |
| EIC     | Negative | 500.2913 | 2.61 | unknown | 32223428  | 241920   | 54246976  | 32118693  | 30630    | 12428    | 48958     | 4442816  | 0        | 27612082 | 624781   | 692825   | 1228702  | 0        | 935099   | 484337    | 724493   | 34621887 | 513609  |
| EIC     | Negative | 443.2411 | 3.49 | unknown | 162474    | 93860    | 135038    | 403726    | 110715   | 119272   | 103210    | 169231   | 124983   | 245459   | 107409   | 137595   | 171995   | 29248    | 49585    | 128427    | 101909   | 218090   | 27791   |
| EIC     | Negative | 319.2640 | 5.96 | unknown | 486264    | 407742   | 538045    | 507159    | 416263   | 268652   | 336716    | 432086   | 34758    | 583833   | 398536   | 250283   | 278596   | 197970   | 397608   | 286868    | 254661   | 364973   | 210911  |
| fpHILIC | Positive | 794.6088 | 0.43 | unknown | 1531860   | 1475069  | 1613438   | 1952598   | 1371058  | 1430519  | 1212965   | 1718203  | 1640698  | 1232325  | 1357400  | 1138156  | 1089298  | 1078385  | 1106300  | 1236413   | 1260526  | 1388046  | 1193420 |
| EIC     | Negative | 240.2044 | 6.30 | unknown | 241278    | 273773   | 445718    | 773805    | 437843   | 226678   | 318616    | 443452   | 426564   | 341391   | 235054   | 280748   | 371830   | 279508   | 81825    | 296163    | 387488   | 533728   | 254515  |
| EIC     | Negative | 583.0304 | 1.19 | unknown | 71932     | 84419    | 71203     | 53074     | 63909    | 70538    | 62189     | 49410    | 54243    | 60721    | 52248    | 50519    | 51945    | 42248    | 47657    | 41357     | 51255    | 48883    | 62786   |
| EIC     | Negative | 281.1765 | 3.45 | unknown | 812541    | 284292   | 743728    | 464801    | 465070   | 422961   | 571439    | 806149   | 188837   | 548677   | 283279   | 452319   | 337264   | 341106   | 400152   | 308837    | 390689   | 715642   | 243968  |
| EIC     | Negative | 316.1999 | 5.64 | unknown | 686062    | 429663   | 635762    | 687994    | 568182   | 398476   | 421008    | 624674   | 472424   | 584817   | 487957   | 464265   | 437390   | 449003   | 422268   | 393367    | 417729   | 491955   | 360448  |
| fpHILIC | Positive | 169.0352 | 2.98 | unknown | 741323    | 451327   | 662115    | 870045    | 391197   | 524184   | 186036    | 340643   | 379703   | 466662   | 637461   | 509019   | 133299   | 238275   | 238275   | 426564    | 390902   | 331923   | 270639  |
| EIC     | Negative | 388.2791 | 5.91 | unknown | 625790    | 244679   | 436812    | 446008    | 252944   | 312159   | 365149    | 265328   | 193809   | 344356   | 367683   | 213032   | 239907   | 390403   | 473042   | 19365     | 331614   | 194502   | 147968  |
| fpHILIC | Negative | 88.0121  | 1.03 | unknown | 9456632   | 6195359  | 5128376   | 3490089   | 4409488  | 6244990  | 6950319   | 1449020  | 1237496  | 4274014  | 5716139  | 3473912  | 2096358  | 4639194  | 4380392  | 4563785   | 1928944  | 3358961  | 2804112 |
| EIC     | Negative | 407.2809 | 5.32 | unknown | 466427    | 375460   | 525977    | 376734    | 460015   | 303824   | 436619    | 441662   | 412352   | 429223   | 364556   | 297456   | 334488   | 324727   | 385391   | 397826    | 324469   | 333339   | 284501  |
| EIC     | Negative | 346.2470 | 5.83 | unknown | 255069    | 289452   | 298952    | 778716    | 294399   | 290669   | 310386    | 395917   | 704045   | 378368   | 277719   | 236720   | 510727   | 185198   | 155156   | 365119    | 398496   | 401014   | 167153  |
| EIC     | Negative | 285.2435 | 4.74 | unknown | 558877    | 516530   | 1107911   | 1266257   | 842808   | 560441   | 635749    | 700875   | 704087   | 728425   | 449792   | 560024   | 538375   | 797045   | 445332   | 551540    | 570482   | 1119219  | 638311  |
| EIC     | Negative | 265.1811 | 3.39 | unknown | 476989    | 179090   | 573285    | 417047    | 237038   | 299346   | 258698    | 474504   | 157539   | 455421   | 238903   | 334267   | 238598   | 241779   | 184633   | 160607    | 182074   | 431354   | 240543  |
| EIC     | Negative | 339.2177 | 3.08 | unknown | 111275    | 45115    | 157463    | 75039     | 46966    | 62266    | 66419     | 88661    | 75039    | 87844    | 46966    | 33435    | 37272    | 26215    | 35905    | 55127     | 21373    | 83115    | 42542   |
| fpHILIC | Positive | 232.0914 | 3.35 | unknown | 511481    | 284197   | 420332    | 443331    | 424594   | 299245   | 330076    | 371318   | 358665   | 315427   | 454135   | 278605   | 260289   | 319851   | 0        | 310326    | 343222   | 404398   | 441348  |
| EIC     | Negative | 278.1840 | 2.85 | unknown | 841132    | 1958731  | 2027589   | 1471377   | 1009541  | 1440893  | 1399664   | 627439   | 2013147  | 185013   | 1503515  | 1286035  | 595471   | 499769   | 970134   | 851081    | 1038371  | 1503426  | 324751  |
| EIC     | Negative | 419.0227 | 1.19 | unknown | 82908     | 79562    | 54392     | 62224     | 55043    | 63910    | 49006     | 44342    | 35637    | 54154    | 49597    | 48561    | 29988    | 36548    | 38326    | 37721     | 36018    | 60287    | 36241   |
| EIC     | Negative | 526.3154 | 4.05 | unknown | 664082    | 740424   | 635867    | 518310    | 50545    | 720077   | 652386    | 568016   | 535399   | 559894   | 581932   | 613823   | 569536   | 606051   | 491762   | 506001    | 491762   | 448233   | 407738  |
| EIC     | Negative | 526.3154 | 3.64 | unknown | 2866034   | 3124893  | 3048715   | 2960253   | 2423798  | 3608757  | 3327332   | 2629917  | 2452408  | 2608236  | 2753064  | 3219338  | 2746947  | 3808417  | 2827870  | 2609321   | 2303715  | 2171872  | 2310521 |
| fpHILIC | Negative | 360.1230 | 3.34 | unknown | 3706960   | 3281150  | 3547248   | 4130820   | 3628468  | 3604156  | 3898922   | 3226699  | 3250642  | 3310279  | 3919218  | 3549484  | 3597755  | 1933647  | 2985622  | 2839537   | 3183934  | 3021542  | 2793608 |
| EIC     | Negative | 527.3190 | 3.64 | unknown | 725149    | 828938   | 931114    | 782873    | 661733   | 1013253  | 939292    | 751647   | 178628   | 741294   | 745055   | 906868   | 757347   | 971166   | 744200   | 736918    | 585072   | 769315   | 602927  |
| EIC     | Negative | 635.5241 | 6.46 | unknown | 17462892  | 15294210 | 10982586  | 13249806  | 9367818  | 11822821 | 15085570  | 13927618 | 11039027 | 15540230 | 12567732 | 8151865  | 10610017 | 16816430 | 13759115 | 4956909   | 14789225 | 11356571 | 6707661 |
| fpHILIC | Positive | 487.1773 | 2.61 | unknown | 2119036   | 797477   | 410937    | 2092656   | 827685   | 1421382  | 629770    | 765837   | 1984292  | 929843   | 333285   | 312421   | 1000247  | 490242   | 507349   | 1695991   | 712458   | 1113525  | 710727  |
| EIC     | Negative | 501.2928 | 2.61 | unknown | 7429882   | 51751    | 11733309  | 6870601   | 72735    | 43988    | 9000      | 9787516  | 38137    | 5742286  | 143212   | 156959   | 218212   | 254473   | 194509   | 117022    | 123514   | 7767320  | 141914  |
| fpHILIC | Negative | 232.0512 | 2.92 | unknown | 381616    | 464266   | 427983    | 413482    | 312931   | 552269   | 387505    | 368659   | 259323   | 409319   | 578777   | 510834   | 382345   | 287663   | 299520   | 353897    | 325113   | 331440   | 276789  |
| EIC     | Negative | 644.3552 | 3.78 | unknown | 117683    | 12246    | 31290     | 77372     | 28829    | 66695    | 31795     | 46167    | 24797    | 49832    | 20610    | 71848    | 0        | 14421    | 41935    | 33677     | 39345    | 0        | 52578   |
| fpHILIC | Positive | 223.1692 | 0.37 | unknown | 677144    | 444011   | 825577    | 778168    | 529108   | 415831   | 562194    | 629559   | 391482   | 556733   | 409070   | 508678   | 399223   | 377868   | 399861   | 374182    | 35       |          |         |

|         |          |          |      |         |          |          |           |           |          |          |          |           |          |           |          |          |          |          |          |          |          |           |          |
|---------|----------|----------|------|---------|----------|----------|-----------|-----------|----------|----------|----------|-----------|----------|-----------|----------|----------|----------|----------|----------|----------|----------|-----------|----------|
| EIC     | Negative | 359.2206 | 6.30 | unknown | 3507741  | 2702638  | 3747857   | 3065577   | 3190465  | 2318695  | 3287806  | 3120255   | 2810355  | 3024320   | 2263609  | 2359371  | 2775485  | 2303972  | 1769597  | 2711978  | 2828471  | 2799538   | 2447737  |
| EIC     | Negative | 395.2440 | 3.45 | unknown | 177586   | 136463   | 313433    | 511663    | 159164   | 173696   | 263834   | 339695    | 323953   | 241438    | 168115   | 268115   | 228112   | 187000   | 94282    | 248385   | 223499   | 371863    | 138001   |
| EIC     | Negative | 451.3447 | 6.51 | unknown | 500494   | 530994   | 636321    | 816199    | 538223   | 382243   | 597150   | 506168    | 588937   | 626270    | 527419   | 532725   | 493471   | 331368   | 419384   | 534712   | 505565   | 446318    | 327453   |
| fpHILIC | Positive | 701.5586 | 0.48 | unknown | 1840866  | 2118972  | 1697155   | 2033773   | 1961204  | 1582951  | 1338830  | 1666573   | 2341282  | 1639807   | 1716288  | 1578410  | 1712840  | 1705661  | 1555111  | 1608029  | 1587739  | 1298444   | 1546167  |
| EIC     | Negative | 463.3066 | 6.09 | unknown | 475201   | 0        | 0         | 1054992   | 0        | 0        | 0        | 0         | 0        | 0         | 0        | 0        | 0        | 0        | 0        | 0        | 0        | 536339    | 0        |
| fpHILIC | Positive | 231.0978 | 3.86 | unknown | 618919   | 243722   | 458431    | 416555    | 298905   | 341121   | 336959   | 292641    | 293769   | 429867    | 326441   | 226386   | 337672   | 237781   | 323862   | 201009   | 311447   | 230987    | 264958   |
| EIC     | Negative | 563.4309 | 6.70 | unknown | 79936    | 67616    | 115478    | 189921    | 117081   | 103760   | 113848   | 84694     | 152416   | 98418     | 122109   | 88170    | 97257    | 102274   | 102274   | 86833    | 54805    | 101487    | 86785    |
| EIC     | Negative | 412.2787 | 5.59 | unknown | 1153241  | 841378   | 980192    | 1727443   | 476942   | 561561   | 868397   | 831358    | 721606   | 906158    | 1063988  | 390871   | 698356   | 1038334  | 1149694  | 188711   | 918384   | 332359    | 372622   |
| EIC     | Negative | 310.1745 | 2.85 | unknown | 1981006  | 4158429  | 4240761   | 3123930   | 2308387  | 317936   | 2441674  | 3014742   | 1431891  | 4254729   | 3888174  | 2551166  | 1435592  | 1223133  | 2246066  | 1948423  | 2292605  | 323784    | 860330   |
| EIC     | Negative | 439.0101 | 1.19 | unknown | 600073   | 555511   | 472211    | 422113    | 397904   | 421651   | 429921   | 379111    | 351277   | 397318    | 345142   | 326395   | 288369   | 296214   | 317256   | 284810   | 295029   | 467061    | 336963   |
| EIC     | Negative | 319.2277 | 2.15 | unknown | 387809   | 0        | 367196    | 0         | 0        | 0        | 0        | 458709    | 0        | 0         | 459152   | 404120   | 0        | 422159   | 0        | 0        | 392781   | 0         |          |
| EIC     | Negative | 315.8959 | 0.52 | unknown | 98875    | 115877   | 147696    | 138186    | 107269   | 123841   | 120971   | 107754    | 136886   | 99271     | 103529   | 109035   | 106889   | 40091    | 94667    | 106703   | 97356    | 124623    | 88248    |
| EIC     | Negative | 264.1689 | 3.06 | unknown | 448834   | 367642   | 395574    | 314955    | 317635   | 407991   | 353189   | 411419    | 215389   | 309589    | 303654   | 329588   | 328159   | 252966   | 291656   | 286207   | 266646   | 344455    | 273508   |
| EIC     | Negative | 458.9978 | 1.19 | unknown | 199098   | 199243   | 196430    | 175449    | 149042   | 137584   | 143866   | 166193    | 144891   | 154804    | 127140   | 119148   | 124101   | 116012   | 117097   | 114585   | 116346   | 173759    | 114594   |
| EIC     | Negative | 345.2436 | 5.83 | unknown | 1002153  | 1272729  | 1256654   | 3165200   | 1137116  | 1189712  | 1333493  | 1609336   | 1985621  | 1644884   | 1123025  | 922800   | 2026631  | 812778   | 700490   | 1477447  | 1598912  | 1718865   | 735113   |
| EIC     | Negative | 287.1659 | 4.94 | unknown | 37262    | 50964    | 77136     | 197145    | 54973    | 24274    | 68800    | 78450     | 0        | 0         | 0        | 24104    | 84987    | 0        | 11428    | 72939    | 42014    | 87656     | 0        |
| EIC     | Negative | 358.0100 | 1.19 | unknown | 190159   | 159128   | 143413    | 127687    | 119244   | 128911   | 128843   | 107715    | 102427   | 130160    | 104170   | 98337    | 84297    | 86700    | 90290    | 81387    | 80219    | 150782    | 101341   |
| EIC     | Negative | 297.1241 | 3.43 | unknown | 150939   | 147034   | 202873    | 539730    | 236214   | 182185   | 230005   | 292559    | 337050   | 321730    | 206031   | 314255   | 266285   | 97069    | 110723   | 233912   | 201064   | 416713    | 135114   |
| EIC     | Negative | 323.1848 | 3.20 | unknown | 224253   | 118166   | 299310    | 379473    | 177891   | 200639   | 171894   | 285071    | 206762   | 275888    | 162531   | 217027   | 176090   | 220989   | 101795   | 186797   | 164421   | 294953    | 148144   |
| fpHILIC | Negative | 285.2708 | 0.37 | unknown | 2522831  | 3181194  | 3171808   | 4239514   | 3300171  | 3436760  | 3239482  | 3130252   | 2647815  | 3212719   | 3017019  | 3379521  | 2569985  | 2673409  | 2022808  | 2444328  | 2634361  | 3197584   | 323073   |
| EIC     | Negative | 315.1967 | 5.64 | unknown | 2955337  | 1983492  | 2950138   | 2956464   | 2941869  | 1675094  | 2023346  | 2796599   | 2129182  | 2839995   | 2156151  | 2094183  | 2155786  | 1864458  | 1834671  | 1906709  | 1968480  | 2183444   | 1661879  |
| EIC     | Negative | 648.3470 | 4.77 | unknown | 297944   | 237880   | 264288    | 199518    | 229732   | 228709   | 268018   | 236452    | 152687   | 263922    | 119627   | 199270   | 199270   | 199270   | 244221   | 241737   | 133675   | 152321    | 194105   |
| EIC     | Negative | 238.1528 | 3.60 | unknown | 110706   | 69305    | 120821    | 174014    | 78233    | 85073    | 96660    | 112552    | 59317    | 90905     | 82873    | 104903   | 100365   | 43628    | 63653    | 83763    | 61677    | 111658    | 50696    |
| EIC     | Negative | 415.2437 | 6.12 | unknown | 431408   | 221031   | 289937    | 617964    | 222426   | 329933   | 320990   | 301282    | 377297   | 429847    | 277932   | 154932   | 243417   | 240139   | 344242   | 344300   | 382333   | 285173    | 178791   |
| fpHILIC | Negative | 89.0131  | 1.03 | unknown | 1850649  | 1311747  | 1069228   | 820836    | 870789   | 1240350  | 1344269  | 291761    | 244090   | 823595    | 1316549  | 633474   | 472465   | 976140   | 913036   | 977669   | 369108   | 560034    | 614989   |
| EIC     | Negative | 282.1798 | 3.22 | unknown | 967459   | 330168   | 685332    | 405020    | 502379   | 483496   | 638303   | 771714    | 132630   | 569188    | 276850   | 392609   | 335159   | 302458   | 445704   | 340635   | 431765   | 689157    | 271268   |
| EIC     | Negative | 515.2876 | 1.50 | unknown | 0        | 4735905  | 287233504 | 219313072 | 7610405  | 9055201  | 3380116  | 411822464 | 49251946 | 340532512 | 12225758 | 6834510  | 64390080 | 36729820 | 19382873 | 9121758  | 15079081 | 359891952 | 11085849 |
| fpHILIC | Negative | 243.0622 | 2.65 | unknown | 15198453 | 12751750 | 12328033  | 18522126  | 13574961 | 17232436 | 14633676 | 11261107  | 12947646 | 16155539  | 16607228 | 14745769 | 14172063 | 8270405  | 14021023 | 12365342 | 13272043 | 10075137  | 10297265 |
| EIC     | Negative | 314.2421 | 3.32 | unknown | 1035551  | 741801   | 1873716   | 6594999   | 1249932  | 1023141  | 1428969  | 2591697   | 1969386  | 1960417   | 1128529  | 20077560 | 1834110  | 745224   | 495905   | 1761909  | 1485396  | 2715220   | 664593   |
| fpHILIC | Negative | 297.2436 | 0.39 | unknown | 2626494  | 2053406  | 5514902   | 8172422   | 3372114  | 2677241  | 3844128  | 5024866   | 36481195 | 3153443   | 2089918  | 3817660  | 3012453  | 3017793  | 1759377  | 4140581  | 3621331  | 4834122   | 2373001  |
| fpHILIC | Positive | 160.0965 | 2.71 | unknown | 2532251  | 1549994  | 2189136   | 2654107   | 1332271  | 2480974  | 1737643  | 2029401   | 2163526  | 2061402   | 2237786  | 2163709  | 1750247  | 1426654  | 1437300  | 2109033  | 1418542  | 2170352   | 1284984  |
| fpHILIC | Positive | 251.1024 | 0.96 | unknown | 3293522  | 1279400  | 2224174   | 3685919   | 2209462  | 2467441  | 1756956  | 1584744   | 1616479  | 2346368   | 2374591  | 2173848  | 2192384  | 1790200  | 1331280  | 2068991  | 1584299  | 2192880   | 1151748  |
| EIC     | Negative | 417.0367 | 0.55 | unknown | 2355440  | 1375011  | 1251304   | 3306365   | 873485   | 2606050  | 1754580  | 969848    | 840311   | 1162540   | 1665319  | 2023976  | 1383624  | 638894   | 1197553  | 1568207  | 930591   | 1387728   | 1007950  |
| fpHILIC | Negative | 359.1195 | 3.34 | unknown | 26471036 | 23045224 | 25683850  | 28673164  | 24714362 | 24368254 | 27524196 | 25100706  | 23572940 | 2471027   | 27264494 | 22778162 | 24767636 | 13842757 | 21161274 | 21713564 | 23347486 | 2265980   | 19968530 |
| EIC     | Negative | 367.2142 | 4.14 | unknown | 91196    | 81780    | 189915    | 113788    | 171388   | 77766    | 187182   | 124090    | 130916   | 79658     | 83373    | 84117    | 146694   | 106602   | 163546   | 70271    | 71761    | 106602    | 101360   |
| EIC     | Negative | 554.3374 | 4.17 | unknown | 3134375  | 4610465  | 3604091   | 2986469   | 3455003  | 3809213  | 4454074  | 3103455   | 3987826  | 2653483   | 3472368  | 3663257  | 4095641  | 4061012  | 3558729  | 3705359  | 3153154  | 2697242   | 3130253  |
| EIC     | Negative | 235.2657 | 4.15 | unknown | 202744   | 206669   | 199328    | 199994    | 199976   | 200733   | 190298   | 176917    | 169337   | 165430    | 176317   | 176450   | 174743   | 176450   | 173110   | 160337   | 177476   | 156925    | 159785   |
| fpHILIC | Positive | 831.5723 | 0.43 | unknown | 1286176  | 2364012  | 2305663   | 1684181   | 1977417  | 2360016  | 2506298  | 1773307   | 1355409  | 1173067   | 2053070  | 2026144  | 1965964  | 1885382  | 1530925  | 1821246  | 1860626  | 1262019   | 2174319  |
| EIC     | Negative | 297.2436 | 6.27 | unknown | 4976633  | 5937773  | 9276877   | 24278629  | 9900755  | 6333294  | 9557475  | 10700820  | 12271779 | 11446867  | 6558148  | 10694572 | 9027802  | 3686949  | 3689234  | 2209814  | 9308046  | 1720577   | 4772396  |
| fpHILIC | Positive | 265.1762 | 1.66 | unknown | 56513    | 817145   | 418537    | 467157    | 336350   | 732252   | 466508   | 245822    | 502687   | 384076    | 603781   | 580788   | 343179   | 543955   | 579415   | 585389   | 230332   | 272533    | 313125   |
| EIC     | Negative | 294.1793 | 3.29 | unknown | 1083313  | 706996   | 1064864   | 942994    | 841938   | 511683   | 710452   | 627932    | 1124217  | 629920    | 630607   | 552998   | 464851   | 759089   | 986988   | 485854   | 717940   | 452363    |          |
| EIC     | Negative | 335.0337 | 0.55 | unknown | 3419767  | 1714355  | 1566417   | 4319237   | 1119758  | 3577704  | 2247286  | 1179519   | 1050785  | 1517794   | 2023742  | 2504130  | 1723478  | 897362   | 1545158  | 2089217  | 1245646  | 1715035   | 1369545  |
| EIC     | Negative | 379.2473 | 4.51 | unknown | 315394   | 187730   | 608359    | 1682774   | 386405   | 335053   | 936759   | 649502    | 626427   | 331403    | 693548   | 518067   | 224589   | 182742   | 653758   | 391333   | 783580   | 227846    |          |
| EIC     | Negative | 606.3688 | 5.01 | unknown | 5930138  | 8106892  | 6691896   | 5477187   | 6968399  | 7508375  | 7361821  | 6144696   | 5482500  | 5150421   | 7583701  | 6546046  | 6944077  | 6360285  | 5629956  | 555910   | 6641640  | 4140813   | 8609658  |
| fpHILIC | Positive | 371.1671 | 1.81 | unknown | 1113307  | 512540   | 872940    | 1326651   | 6182507  | 905408   | 576001   | 774541    | 1070823  | 667791    | 742738   | 635435   | 400051   | 631077   | 741339   | 548894   | 759902   | 466924    | 742781   |
| EIC     | Negative | 416.3004 | 6.25 | unknown | 962211   | 583426   | 799156    | 972343    | 352732   | 578678   | 572163   | 730222    | 513494   | 647776    | 711794   | 464246   | 517103   | 677969   | 674870   | 59125    | 561663   | 570867    | 519202   |
| EIC     | Negative | 245.1552 | 4.23 | unknown | 133068   | 75090    | 197344    | 399605    | 71362    | 78329    | 99757    | 157149    | 85692    | 171793    | 72680    | 104285   | 149291   | 24273    | 41998    | 88834    | 97292    | 148559    | 58937    |
| fpHILIC | Negative | 310.2833 | 0.37 | unknown | 1577561  | 2566790  | 3563020   | 7315332   | 3362005  | 2271494  | 2432741  | 2283728   | 2299011  | 2185474   | 1807725  | 3720714  | 2539588  | 1374732  | 16277    |          |          |           |          |



|         |          |            |      |         |          |          |          |          |          |          |          |          |          |          |          |          |          |          |          |          |          |          |          |
|---------|----------|------------|------|---------|----------|----------|----------|----------|----------|----------|----------|----------|----------|----------|----------|----------|----------|----------|----------|----------|----------|----------|----------|
| EIC     | Negative | 440.0129   | 1.19 | unknown | 129139   | 130245   | 104637   | 92693    | 91933    | 95468    | 89509    | 75418    | 81892    | 100218   | 75873    | 74614    | 72339    | 74703    | 67484    | 63542    | 67015    | 102625   | 80197    |
| EIC     | Negative | 285.2073   | 4.09 | unknown | 4433611  | 1413510  | 3687500  | 2464210  | 2260879  | 2747064  | 2489435  | 3779239  | 498302   | 2694798  | 1282818  | 2201349  | 1480683  | 1456318  | 2066094  | 1171766  | 1713787  | 3991433  | 1382333  |
| EIC     | Negative | 409.2821   | 4.72 | unknown | 729597   | 847945   | 660784   | 653227   | 828966   | 680887   | 728679   | 700041   | 717356   | 787909   | 657675   | 700269   | 744617   | 626931   | 665347   | 732490   | 636990   | 607676   | 612168   |
| EIC     | Negative | 414.2489   | 6.12 | unknown | 272745   | 199991   | 165093   | 374027   | 131906   | 210826   | 159893   | 210662   | 252872   | 243842   | 155457   | 105665   | 139748   | 155910   | 209156   | 110524   | 231503   | 157654   | 115304   |
| EIC     | Negative | 263.1654   | 3.06 | unknown | 2552601  | 1972020  | 2126071  | 1738180  | 1770669  | 2211085  | 2055098  | 2253763  | 1168019  | 1736584  | 1707062  | 1805447  | 1840388  | 1390261  | 1640969  | 1587054  | 1588878  | 1902949  | 1580784  |
| EIC     | Negative | 274.1047   | 0.61 | unknown | 117143   | 38142    | 66016    | 52541    | 35730    | 47477    | 36433    | 25498    | 39954    | 70848    | 37545    | 25784    | 33961    | 27801    | 38902    | 26113    | 34533    | 28063    | 34424    |
| fpHILIC | Positive | 546.3526   | 0.55 | unknown | 17810554 | 21087640 | 22580520 | 18365130 | 19692816 | 22227824 | 22406690 | 19651786 | 16206614 | 17455912 | 20973064 | 19385070 | 21095920 | 17362990 | 15795507 | 16498022 | 20558690 | 15442801 | 19704342 |
| EIC     | Negative | 313.1197   | 1.25 | unknown | 882574   | 316965   | 587021   | 600051   | 322604   | 364406   | 364738   | 659825   | 398252   | 656360   | 342402   | 431487   | 414264   | 383719   | 353226   | 459877   | 414755   | 297256   | 325503   |
| fpHILIC | Positive | 119.0836   | 2.28 | unknown | 4363163  | 2826480  | 4405076  | 3489530  | 3203498  | 3549188  | 3071149  | 3781207  | 2719587  | 3591710  | 3237852  | 2765021  | 2860915  | 2170062  | 2604871  | 2562060  | 2939350  | 3901557  | 2319109  |
| EIC     | Negative | 295.2279   | 4.09 | unknown | 1196562  | 1103435  | 2134152  | 4575432  | 1740320  | 1343387  | 1553686  | 2671921  | 2063285  | 1754999  | 1232304  | 1907209  | 1635089  | 1073199  | 692574   | 2311623  | 1756424  | 2509843  | 963624   |
| fpHILIC | Negative | 144.0456   | 0.96 | unknown | 581744   | 328776   | 331624   | 270353   | 400955   | 387166   | 417653   | 249393   | 204436   | 201135   | 299720   | 246541   | 200868   | 340367   | 413402   | 235259   | 276396   | 228877   | 304782   |
| EIC     | Negative | 516.2731   | 3.42 | unknown | 502036   | 281652   | 367598   | 361695   | 235776   | 490284   | 192658   | 353826   | 332142   | 355820   | 231488   | 301655   | 190558   | 203280   | 297903   | 262884   | 436120   | 0        | 413978   |
| EIC     | Negative | 607.3712   | 5.01 | unknown | 979122   | 1443886  | 1087342  | 834884   | 1123811  | 1254290  | 1185797  | 1005713  | 897569   | 848596   | 1299474  | 1018607  | 1013841  | 1054915  | 903050   | 945305   | 1128784  | 755783   | 1074761  |
| EIC     | Negative | 579.3498   | 4.74 | unknown | 16279552 | 20844888 | 19387687 | 14220115 | 16333479 | 18007721 | 18775571 | 15989137 | 13928394 | 13785145 | 18900562 | 17538764 | 15118765 | 18266269 | 14875040 | 13990336 | 13002162 | 12841492 | 18309668 |
| EIC     | Negative | 570.3420   | 3.26 | unknown | 190334   | 125078   | 170487   | 125223   | 115337   | 210131   | 121877   | 158025   | 35112    | 167572   | 151313   | 161113   | 33564    | 157917   | 143096   | 43177    | 93401    | 121970   | 161650   |
| EIC     | Negative | 418.0401   | 0.55 | unknown | 299013   | 152918   | 139233   | 432842   | 107662   | 325653   | 206540   | 85741    | 137970   | 186284   | 246260   | 178220   | 90722    | 153688   | 195958   | 123140   | 164734   | 129023   |          |
| EIC     | Negative | 598.3734   | 5.31 | unknown | 1236132  | 1203721  | 1277595  | 1102161  | 1128818  | 1109181  | 1218104  | 1413901  | 744665   | 1101410  | 1058855  | 899160   | 892448   | 927971   | 1074273  | 781163   | 1101741  | 1122816  | 873723   |
| EIC     | Negative | 257.1760   | 2.90 | unknown | 7921887  | 2375161  | 5614553  | 4182541  | 2265861  | 2395851  | 2626974  | 3586815  | 1653946  | 6731816  | 2183656  | 2710230  | 1890947  | 2004458  | 2065136  | 2116648  | 1829452  | 3485172  | 1514661  |
| EIC     | Negative | 578.3467   | 4.74 | unknown | 52150384 | 65805283 | 61475042 | 45091787 | 51313156 | 57415961 | 59362053 | 50002208 | 43359132 | 49320326 | 58462167 | 55592855 | 48116414 | 56991638 | 47504507 | 44332832 | 41517968 | 40431747 | 5021565  |
| EIC     | Negative | 433.3331   | 4.16 | unknown | 134799   | 73110    | 116850   | 154236   | 114848   | 142732   | 99568    | 142287   | 75422    | 170103   | 83771    | 79653    | 69425    | 23067    | 66535    | 91498    | 425673   | 7906925  | 90965    |
| EIC     | Negative | 265.1811   | 2.82 | unknown | 216653   | 155142   | 362262   | 268033   | 182126   | 231155   | 202481   | 305022   | 164888   | 309808   | 174756   | 229257   | 158039   | 216557   | 158224   | 138833   | 130771   | 330144   | 205507   |
| EIC     | Negative | 442.2965   | 5.95 | unknown | 120682   | 138661   | 299333   | 477694   | 150682   | 176643   | 134841   | 279644   | 213585   | 308087   | 174756   | 104553   | 165438   | 117555   | 109560   | 126635   | 143365   | 325466   | 130540   |
| EIC     | Negative | 567.3505   | 4.77 | unknown | 2164042  | 2915374  | 2469020  | 1571531  | 2112566  | 2738995  | 2952724  | 1979743  | 1474587  | 1826877  | 2107176  | 2543548  | 2039730  | 2242163  | 2412882  | 2083728  | 1769853  | 1505036  | 2170694  |
| EIC     | Negative | 305.1747   | 3.34 | unknown | 1029930  | 202645   | 1120812  | 746773   | 329558   | 254608   | 342544   | 715713   | 281594   | 1383140  | 2466174  | 304022   | 248158   | 275510   | 253470   | 222998   | 253447   | 726551   | 242621   |
| EIC     | Negative | 258.2158   | 3.48 | unknown | 59117    | 36106    | 83432    | 127189   | 56036    | 42449    | 56558    | 87437    | 34558    | 70534    | 47602    | 65369    | 50163    | 24782    | 38394    | 51156    | 49558    | 86932    | 36338    |
| EIC     | Negative | 444.6736   | 0.63 | unknown | 261384   | 230052   | 597112   | 416672   | 241935   | 288919   | 228283   | 168150   | 361000   | 738335   | 236454   | 210222   | 272123   | 112970   | 182264   | 158825   | 188939   | 305972   | 301968   |
| EIC     | Negative | 516.6092   | 0.64 | unknown | 96457    | 37555    | 103033   | 71644    | 86595    | 95973    | 59748    | 40589    | 61132    | 161866   | 39415    | 29912    | 49775    | 141335   | 44611    | 37985    | 29839    | 58512    | 100842   |
| EIC     | Negative | 284.1954   | 3.34 | unknown | 2118873  | 368087   | 2282012  | 1597890  | 602932   | 584463   | 679281   | 1848763  | 501817   | 2657282  | 464093   | 624074   | 529346   | 514847   | 486708   | 415554   | 497036   | 1575222  | 427635   |
| fpHILIC | Positive | 263.0732   | 3.15 | unknown | 703539   | 497336   | 450766   | 634709   | 485874   | 635624   | 379759   | 405452   | 588694   | 494117   | 417008   | 483941   | 405435   | 410662   | 387552   | 557846   | 440652   | 429141   | 389725   |
| EIC     | Negative | 361.1659   | 3.38 | unknown | 615647   | 110554   | 589561   | 287085   | 270293   | 307532   | 372766   | 724445   | 59747    | 453200   | 187735   | 217781   | 154332   | 167699   | 253911   | 125054   | 250077   | 636577   | 267303   |
| EIC     | Negative | 482.6955   | 0.52 | unknown | 218060   | 58213    | 186904   | 172013   | 226878   | 149460   | 155833   | 79093    | 84299    | 264344   | 67255    | 80906    | 106662   | 327606   | 100968   | 102090   | 57276    | 128388   | 208075   |
| EIC     | Negative | 540.3314   | 3.75 | unknown | 612907   | 44224    | 2100030  | 781511   | 60209    | 55925    | 31268    | 1651086  | 44719    | 0        | 63475    | 65771    | 49161    | 100117   | 76269    | 72278    | 63234    | 137988   | 50458    |
| EIC     | Negative | 344.1546   | 2.83 | unknown | 1667411  | 0        | 1618741  | 3598426  | 49337    | 0        | 1586646  | 0        | 1855515  | 0        | 0        | 0        | 0        | 0        | 0        | 0        | 0        | 1422654  | 24341    |
| EIC     | Negative | 599.2525   | 0.84 | unknown | 136099   | 98748    | 195129   | 151738   | 65694    | 39778    | 100837   | 115140   | 53140    | 123556   | 103106   | 80128    | 114235   | 26938    | 45530    | 74773    | 49019    | 131755   | 30360    |
| EIC     | Negative | 323.1851   | 2.97 | unknown | 164180   | 83234    | 182846   | 188366   | 137874   | 132737   | 113196   | 190609   | 83234    | 128866   | 90509    | 144500   | 143621   | 77982    | 79865    | 116695   | 216029   | 124969   |          |
| fpHILIC | Negative | 332.2676   | 0.37 | unknown | 1212764  | 1322858  | 1662320  | 2762476  | 1273747  | 1356110  | 1691269  | 1761052  | 1268422  | 1776489  | 1069459  | 1769554  | 1531363  | 879463   | 1186121  | 819372   | 1363731  | 1805828  | 1333443  |
| EIC     | Negative | 265.1811   | 3.31 | unknown | 1993312  | 914886   | 2209122  | 2747777  | 1248859  | 1426963  | 1378178  | 19692349 | 911771   | 2071728  | 1162966  | 1965839  | 1497976  | 776421   | 914693   | 1278355  | 871167   | 1980432  | 850627   |
| EIC     | Negative | 265.1811   | 2.88 | unknown | 274099   | 128277   | 268375   | 405137   | 166773   | 205727   | 161524   | 258243   | 133637   | 322906   | 147045   | 249741   | 183429   | 113404   | 114398   | 128314   | 140515   | 313883   | 122843   |
| fpHILIC | Negative | 557.4577   | 0.35 | unknown | 3504167  | 3400369  | 3357100  | 2683361  | 3596489  | 2630053  | 3269440  | 3115753  | 2590231  | 2590231  | 2427241  | 1885919  | 2134872  | 3122715  | 1633711  | 1976897  | 2329101  | 2472774  |          |
| fpHILIC | Negative | 239.0773   | 3.34 | unknown | 959828   | 858442   | 918962   | 895974   | 871424   | 858770   | 922467   | 842057   | 781643   | 784104   | 749172   | 651400   | 811253   | 722851   | 710768   | 729932   | 922338   | 757000   | 673130   |
| fpHILIC | Negative | 279.0383   | 2.65 | unknown | 630858   | 566431   | 526016   | 480984   | 685813   | 689384   | 595366   | 488470   | 681172   | 673916   | 637916   | 580663   | 370047   | 565375   | 508460   | 605312   | 438677   | 416171   |          |
| EIC     | Negative | 319.2640   | 6.03 | unknown | 253395   | 203865   | 275451   | 247241   | 234867   | 178985   | 161629   | 255372   | 186149   | 296728   | 212622   | 139460   | 166353   | 161764   | 214928   | 163105   | 176258   | 210021   | 137998   |
| EIC     | Negative | 377.9976   | 1.19 | unknown | 131000   | 119131   | 113033   | 104647   | 89220    | 88238    | 90447    | 75565    | 94059    | 96760    | 73425    | 70959    | 72277    | 66656    | 70794    | 64362    | 69940    | 109004   | 74170    |
| EIC     | Negative | 568.3515   | 4.77 | unknown | 459588   | 573882   | 518049   | 367254   | 458300   | 540984   | 610752   | 440591   | 315495   | 395862   | 468897   | 517538   | 460078   | 487823   | 528864   | 495883   | 350760   | 301195   | 423469   |
| EIC     | Negative | 361.1846   | 3.26 | unknown | 3842994  | 3010442  | 4329677  | 10412952 | 1517784  | 2864255  | 2285661  | 1078949  | 776382   | 373454   | 1766650  | 1086254  | 507043   | 285262   | 2037020  | 2893917  | 799660   | 1187297  | 651100   |
| EIC     | Negative | 243.1276   | 6.19 | unknown | 1001950  | 777961   | 857815   | 689220   | 814155   | 782637   | 725707   | 1032193  | 412808   | 644738   | 655688   | 860466   | 614139   | 525595   | 692702   | 691620   | 598158   | 753373   | 610557   |
| EIC     | Negative | 296.2951   | 3.71 | unknown | 196929   | 82227    | 190117   | 125116   | 125655   | 103106   | 154268   | 196587   | 77305    | 632628   | 87820    | 120136   | 89921    | 86615    | 104903   | 102096   | 99541    | 193765   | 82506    |
| EIC     | Negative | 293.2124   | 3.77 | unknown | 873580   | 672517   | 1195816  | 807419   | 867500   | 842618   | 988319   | 972912   | 671503   | 838162   | 582594   | 514235   | 496421   | 1448041  | 339837   | 641652   | 815803   | 1382925  | 679479   |
| EIC     | Negative | 426.7345</ |      |         |          |          |          |          |          |          |          |          |          |          |          |          |          |          |          |          |          |          |          |

|         |          |          |      |         |           |           |           |           |           |           |           |          |           |           |           |           |           |          |          |           |           |           |          |
|---------|----------|----------|------|---------|-----------|-----------|-----------|-----------|-----------|-----------|-----------|----------|-----------|-----------|-----------|-----------|-----------|----------|----------|-----------|-----------|-----------|----------|
| EIC     | Negative | 315.1601 | 3.29 | unknown | 305731    | 283463    | 407960    | 374609    | 268298    | 188864    | 234069    | 258726   | 248113    | 490345    | 288235    | 264719    | 227291    | 184250   | 328439   | 190661    | 183465    | 251754    | 117244   |
| EIC     | Negative | 311.2010 | 5.27 | unknown | 944561    | 1102304   | 973924    | 1542277   | 0         | 0         | 0         | 1418507  | 0         | 1068292   | 1269499   | 1268385   | 1214839   | 1292630  | 1268994  | 0         | 0         | 0         | 0        |
| EIC     | Negative | 529.2903 | 4.17 | unknown | 377817    | 502932    | 401887    | 383199    | 381389    | 406321    | 484387    | 436300   | 480595    | 384620    | 406659    | 411777    | 431020    | 511681   | 428763   | 402280    | 381411    | 358460    | 387445   |
| EIC     | Negative | 253.1446 | 2.89 | unknown | 3550653   | 1029618   | 2219306   | 1357362   | 1016841   | 1297303   | 1413684   | 1664217  | 711017    | 2093735   | 731958    | 1156420   | 833635    | 892829   | 1127221  | 832945    | 867085    | 1783823   | 849799   |
| fpHILIC | Negative | 306.2521 | 0.37 | unknown | 1634905   | 3295080   | 2895866   | 3556772   | 2387812   | 2859768   | 2985144   | 2399958  | 3072660   | 3292628   | 2583327   | 2409165   | 2781234   | 1524912  | 2107034  | 1995602   | 2649322   | 2876233   | 2636047  |
| fpHILIC | Negative | 173.0091 | 4.58 | unknown | 31245084  | 25812978  | 25301750  | 29573402  | 27296468  | 34122464  | 27840914  | 21755594 | 28733000  | 21198906  | 96146386  | 23911766  | 25203094  | 23519164 | 22635910 | 29203292  | 23953534  | 25643860  | 23704914 |
| EIC     | Negative | 227.1652 | 3.60 | unknown | 173564    | 87059     | 178758    | 139950    | 102714    | 121004    | 116142    | 139930   | 96549     | 166757    | 271265    | 151871    | 154976    | 50919    | 77161    | 121616    | 939534    | 1546169   | 59234    |
| EIC     | Negative | 280.1613 | 4.45 | unknown | 418244    | 71435     | 243402    | 341031    | 149745    | 69302     | 160403    | 203148   | 54040     | 189321    | 78293     | 152698    | 144928    | 52640    | 80479    | 140541    | 67254     | 281962    | 0        |
| fpHILIC | Negative | 114.0197 | 0.59 | unknown | 5673831   | 6191681   | 6757223   | 3777712   | 2990360   | 5329401   | 6765931   | 1780297  | 1220849   | 5970265   | 5164596   | 3364324   | 1945597   | 4718623  | 3980431  | 4272726   | 1284622   | 3005733   | 2760692  |
| EIC     | Negative | 330.9579 | 1.19 | unknown | 182096    | 156921    | 133999    | 130798    | 123683    | 120557    | 115632    | 113796   | 113104    | 141380    | 108350    | 104906    | 93446     | 89887    | 103280   | 91777     | 82002     | 149487    | 99231    |
| fpHILIC | Negative | 558.4603 | 0.36 | unknown | 1347358   | 1402285   | 1291919   | 1013406   | 1594609   | 1165751   | 1337556   | 1166392  | 857987    | 877782    | 1042406   | 1029916   | 761083    | 829229   | 1408833  | 1151975   | 1002633   | 939356    | 983755   |
| fpHILIC | Negative | 293.1144 | 2.73 | unknown | 1769676   | 998957    | 1246480   | 934804    | 976704    | 1724352   | 1101774   | 913559   | 993015    | 1393235   | 991741    | 1157706   | 834179    | 1238458  | 1339336  | 880876    | 927069    | 1043278   | 926392   |
| EIC     | Negative | 245.1580 | 5.01 | unknown | 182378    | 100242    | 206976    | 228194    | 110995    | 114949    | 92070     | 157947   | 44418     | 163456    | 95199     | 86216     | 81356     | 18465    | 83706    | 149976    | 45753     | 166790    | 20456    |
| EIC     | Negative | 475.9986 | 0.55 | unknown | 75587     | 68696     | 73184     | 146487    | 28026     | 107943    | 82309     | 32038    | 51241     | 47577     | 78360     | 87185     | 78572     | 0        | 63580    | 105791    | 27324     | 0         | 73847    |
| fpHILIC | Negative | 282.1182 | 2.82 | unknown | 1560910   | 1060067   | 1023369   | 1707873   | 1219409   | 1919701   | 1142958   | 1067519  | 1128601   | 1029026   | 1230531   | 1248684   | 1315135   | 967616   | 968918   | 1272828   | 1185948   | 1386403   | 998961   |
| EIC     | Negative | 471.2196 | 0.71 | unknown | 511600    | 777663    | 853866    | 468778    | 485642    | 588463    | 76236     | 841849   | 429614    | 510570    | 812449    | 704573    | 619192    | 408251   | 614312   | 479590    | 593307    | 646085    | 506473   |
| EIC     | Negative | 239.1339 | 4.05 | unknown | 177030    | 86870     | 188563    | 247843    | 85777     | 108920    | 115210    | 133820   | 68542     | 137146    | 88094     | 134635    | 127717    | 43067    | 76529    | 89865     | 89953     | 149034    | 54552    |
| EIC     | Negative | 475.2835 | 4.68 | unknown | 1253006   | 1314683   | 1314851   | 974009    | 940731    | 1220656   | 879110    | 1122392  | 624725    | 921761    | 1015488   | 990431    | 757251    | 1536079  | 1103503  | 0         | 874893    | 1154419   | 1166241  |
| EIC     | Negative | 450.3313 | 3.74 | unknown | 1391368   | 177326    | 2566472   | 401352    | 232372    | 128288    | 119871    | 752661   | 175018    | 663150    | 120783    | 99463     | 67046     | 135796   | 117208   | 138647    | 127836    | 765212    | 115705   |
| EIC     | Negative | 434.2368 | 5.63 | unknown | 2728047   | 2507030   | 1969877   | 3796454   | 2014690   | 1841690   | 2231899   | 1923235  | 2670362   | 3087377   | 1947143   | 1848519   | 2843644   | 907867   | 1577038  | 2494778   | 1821461   | 2531017   | 1168544  |
| fpHILIC | Negative | 202.9978 | 2.98 | unknown | 3261211   | 3024775   | 3406365   | 3998115   | 2147717   | 3004320   | 2767997   | 1930420  | 2354827   | 2920377   | 3005346   | 2510444   | 3218496   | 1032832  | 1617931  | 2263371   | 2260157   | 2779136   | 2041694  |
| EIC     | Negative | 308.8195 | 0.52 | unknown | 357946    | 177594    | 251637    | 223474    | 397742    | 218288    | 227822    | 152008   | 416232    | 194622    | 118385    | 119982    | 206311    | 1296397  | 199582   | 154677    | 154266    | 237239    | 312472   |
| EIC     | Negative | 278.1476 | 3.87 | unknown | 625024    | 623407    | 397247    | 604688    | 418423    | 316640    | 391169    | 391368   | 493151    | 394287    | 1253908   | 631413    | 624975    | 360518   | 315962   | 387305    | 296932    | 444996    | 361288   |
| EIC     | Negative | 296.2313 | 4.09 | unknown | 232290    | 217858    | 410759    | 911484    | 341582    | 272999    | 303533    | 507590   | 383550    | 376948    | 240770    | 364572    | 377732    | 211376   | 147610   | 442574    | 364627    | 490174    | 176108   |
| EIC     | Negative | 250.1893 | 3.29 | unknown | 382117    | 278654    | 409917    | 399565    | 277432    | 185952    | 267104    | 275812   | 227995    | 437159    | 268250    | 223673    | 207182    | 184876   | 288958   | 226125    | 175671    | 240660    | 177780   |
| fpHILIC | Negative | 244.0656 | 2.65 | unknown | 16780649  | 10226163  | 33665623  | 43050154  | 20562076  | 11438906  | 17406373  | 38735321 | 19154512  | 26930295  | 13637844  | 16002392  | 15343342  | 20777271 | 13976288 | 11677555  | 18591576  | 36960645  | 15251076 |
| fpHILIC | Negative | 114.0055 | 1.92 | unknown | 1414005   | 1278976   | 1149467   | 1804889   | 1334987   | 1592648   | 1474101   | 1060867  | 1177643   | 1588415   | 1569906   | 1334885   | 1360699   | 780222   | 1333680  | 1293696   | 1340947   | 1105296   | 985229   |
| fpHILIC | Negative | 114.0354 | 1.92 | unknown | 5891754   | 2023804   | 2380156   | 9567101   | 3027250   | 3304002   | 3055148   | 2143355  | 5849867   | 4347980   | 3964700   | 371258    | 4197836   | 1346921  | 2728464  | 6567812   | 2638655   | 2136106   | 1357138  |
| fpHILIC | Negative | 384.1849 | 0.59 | unknown | 1122620   | 387118    | 654646    | 816048    | 374094    | 234871    | 248429    | 673075   | 266138    | 677282    | 180026    | 485412    | 394961    | 295502   | 203627   | 126842    | 351386    | 715708    | 217836   |
| EIC     | Negative | 333.1712 | 3.02 | unknown | 275281    | 144785    | 308712    | 218961    | 176458    | 133840    | 235881    | 239481   | 89078     | 652444    | 138194    | 143348    | 112062    | 105774   | 132158   | 111307    | 102042    | 346842    | 94321    |
| fpHILIC | Positive | 730.5366 | 0.45 | unknown | 521224    | 617479    | 630720    | 736033    | 339225    | 545891    | 619792    | 501387   | 341939    | 378903    | 505618    | 357553    | 511398    | 703168   | 427100   | 320586    | 444602    | 459489    | 460480   |
| EIC     | Negative | 283.1919 | 3.34 | unknown | 12176979  | 2106981   | 12813028  | 8969354   | 3263764   | 3131823   | 3893135   | 8203990  | 2912104   | 14713830  | 2628826   | 3628918   | 2998855   | 2956802  | 2770778  | 2302200   | 2835352   | 8944555   | 2407121  |
| EIC     | Negative | 288.1902 | 2.42 | unknown | 191065    | 74329     | 214683    | 102926    | 70334     | 70185     | 102926    | 44444    | 187889    | 78612     | 82189     | 74898     | 75671     | 73120    | 15676    | 80850     | 151213    | 76159     | 0        |
| EIC     | Negative | 336.1900 | 3.72 | unknown | 161861    | 55852     | 157431    | 116146    | 70057     | 88182     | 80362     | 152005   | 22842     | 106064    | 53252     | 62609     | 54059     | 32709    | 57380    | 55514     | 51098     | 161326    | 47047    |
| fpHILIC | Negative | 226.1448 | 0.41 | unknown | 1788247   | 717721    | 795033    | 1854133   | 886273    | 1647853   | 1108402   | 953946   | 790268    | 1137472   | 875792    | 1376839   | 1133457   | 315414   | 1089913  | 1016757   | 1060320   | 1052539   | 633751   |
| fpHILIC | Negative | 216.0986 | 2.59 | unknown | 3714719   | 2044372   | 3277821   | 3407448   | 2931702   | 3895191   | 3038983   | 3009379  | 1663132   | 3043276   | 2554731   | 2529257   | 2379849   | 2725570  | 2435910  | 3078055   | 2480020   | 2690623   | 2412096  |
| EIC     | Negative | 552.3314 | 3.96 | unknown | 8862766   | 14738162  | 10187350  | 8539213   | 10172000  | 11485133  | 9134254   | 11335323 | 8177197   | 10865253  | 11726196  | 12225351  | 14725538  | 11900181 | 11442447 | 9899300   | 7863671   | 9325763   | 0        |
| fpHILIC | Negative | 245.0778 | 2.01 | unknown | 1251306   | 778007    | 702747    | 1387976   | 926895    | 1366403   | 936457    | 680981   | 945476    | 971814    | 1032496   | 983239    | 854363    | 511407   | 780397   | 1170504   | 970204    | 764822    | 696647   |
| fpHILIC | Positive | 833.5862 | 0.43 | unknown | 2886122   | 5769390   | 2673665   | 2851207   | 3740967   | 3959837   | 464560    | 2915390  | 3190708   | 2529114   | 3634152   | 3527901   | 3863800   | 3313674  | 3787876  | 3940381   | 3368258   | 2259595   | 306942   |
| EIC     | Negative | 344.2314 | 4.97 | unknown | 309986    | 408966    | 341640    | 1263398   | 393952    | 351232    | 392368    | 520399   | 361761    | 516303    | 402075    | 437150    | 589041    | 201924   | 282486   | 569084    | 385295    | 585647    | 241997   |
| fpHILIC | Negative | 167.0210 | 2.98 | unknown | 176452656 | 153122240 | 176614080 | 190393344 | 110795944 | 147085120 | 137182488 | 93586544 | 110722448 | 146013600 | 136019072 | 125725304 | 144646720 | 55936532 | 83744568 | 111944224 | 120426488 | 129692488 | 95659094 |
| EIC     | Negative | 630.3782 | 4.43 | unknown | 309434    | 0         | 323566    | 0         | 0         | 0         | 321882    | 283765   | 0         | 0         | 0         | 0         | 0         | 0        | 0        | 0         | 0         | 239749    | 307341   |
| EIC     | Negative | 282.7780 | 0.52 | unknown | 247423    | 74278     | 194854    | 125979    | 282072    | 117760    | 133025    | 33644    | 94753     | 322551    | 39186     | 36551     | 86671     | 1248990  | 108142   | 88900     | 34579     | 98197     | 267584   |
| EIC     | Negative | 289.1447 | 1.76 | unknown | 229542    | 98969     | 324660    | 108325    | 28370     | 84667     | 81071     | 99226    | 29118     | 147033    | 88668     | 101911    | 101038    | 75082    | 47729    | 81739     | 79174     | 0         | 82891    |
| EIC     | Negative | 474.9950 | 0.55 | unknown | 815523    | 495150    | 479513    | 1148443   | 299506    | 949952    | 607018    | 324376   | 316807    | 688883    | 181733    | 689542    | 464097    | 79630    | 441088   | 653688    | 344342    | 485257    | 335145   |
| fpHILIC | Negative | 198.0715 | 2.92 | unknown | 2699911   | 3023496   | 2741805   | 2372508   | 2192178   | 3180800   | 2379168   | 2313855  | 1571667   | 2613936   | 3102919   | 3268184   | 2463879   | 1940955  | 2057644  | 2133083   | 1952776   | 2220921   | 2164612  |
| EIC     | Negative | 311.9930 | 0.55 | unknown | 145318    | 30626     | 40663     | 157940    | 51803     | 124465    | 82086     | 11578    | 22294     | 72258     | 75328     | 50788     | 30868     | 16236    | 74124    | 72517     | 18334     | 39207     | 59842    |
| EIC     | Negative | 360.2676 | 6.36 | unknown | 991527    | 613020    | 1127793   | 1540492   | 845004    | 815611    | 972550    | 1378812  | 1000562   | 929129    | 864607    | 921       |           |          |          |           |           |           |          |

|         |          |          |      |         |           |           |           |           |           |           |           |           |           |           |           |           |           |           |          |          |           |           |           |
|---------|----------|----------|------|---------|-----------|-----------|-----------|-----------|-----------|-----------|-----------|-----------|-----------|-----------|-----------|-----------|-----------|-----------|----------|----------|-----------|-----------|-----------|
| fpHILIC | Negative | 291.1312 | 3.47 | unknown | 4312681   | 2484462   | 3112150   | 2798587   | 2440759   | 2728824   | 2215492   | 2508075   | 2074561   | 2708263   | 2519776   | 2698675   | 2368695   | 1735608   | 3105560  | 2387552  | 2316100   | 3110728   | 0         |
| EIC     | Negative | 239.1653 | 2.74 | unknown | 623032    | 332524    | 744839    | 733143    | 451209    | 368851    | 381811    | 518306    | 308418    | 1245433   | 310821    | 400032    | 336418    | 623141    | 157696   | 150347   | 358496    | 862950    | 321531    |
| fpHILIC | Positive | 702.5610 | 0.48 | unknown | 896253    | 915284    | 799491    | 876262    | 818434    | 746471    | 593818    | 836674    | 1068614   | 805418    | 803962    | 790406    | 761060    | 928434    | 811150   | 1068614  | 749570    | 629532    | 72628     |
| EIC     | Negative | 241.1808 | 3.15 | unknown | 1226445   | 881310    | 1614630   | 2131266   | 1294926   | 1606081   | 1481666   | 1269282   | 1592811   | 1102459   | 1876485   | 1905908   | 1355084   | 908577    | 1323824  | 1438773  | 166228    | 965018    |           |
| fpHILIC | Negative | 289.0793 | 3.38 | unknown | 767714    | 204137    | 329439    | 473394    | 219422    | 591879    | 138598    | 111632    | 332063    | 73730     | 249895    | 141581    | 110831    | 35779     | 382323   | 185943   | 493444    | 359523    |           |
| fpHILIC | Negative | 195.1010 | 2.97 | unknown | 1378661   | 1100737   | 1069940   | 1329413   | 1068574   | 1467041   | 1148016   | 538766    | 1213664   | 1065894   | 1289841   | 1514651   | 1074953   | 319994    | 976586   | 1453548  | 1066962   | 692480    | 773428    |
| EIC     | Negative | 461.2908 | 6.09 | unknown | 9284084   | 11397159  | 8013130   | 27378009  | 4572642   | 1719304   | 5764008   | 10561882  | 10613438  | 11721026  | 11568468  | 3401668   | 10943707  | 11168729  | 7796542  | 3348445  | 9847656   | 1166544   | 6225316   |
| EIC     | Negative | 391.2439 | 6.24 | unknown | 1288832   | 515099    | 8811693   | 1259265   | 431042    | 395340    | 563861    | 787820    | 659283    | 873265    | 695292    | 372591    | 586348    | 662658    | 742264   | 188430   | 506607    | 813165    | 341814    |
| EIC     | Negative | 411.1798 | 1.78 | unknown | 327287    | 191008    | 298140    | 111859    | 111103    | 75226     | 188403    | 0         | 155128    | 244016    | 121723    | 143063    | 110588    | 126502    | 100623   | 190508   | 121584    | 0         | 71562     |
| fpHILIC | Positive | 808.5810 | 0.43 | unknown | 27496506  | 30193594  | 23060724  | 23147580  | 23454950  | 26460218  | 28449452  | 23144480  | 21962158  | 19938434  | 23742776  | 25981562  | 24174590  | 23259934  | 23750416 | 23121598 | 24505920  | 18827248  | 22699072  |
| EIC     | Negative | 268.2001 | 3.77 | unknown | 419883    | 204580    | 473235    | 322367    | 207286    | 222081    | 234135    | 348105    | 111213    | 342365    | 207781    | 220610    | 180080    | 164953    | 189770   | 147917   | 135811    | 371729    | 181669    |
| EIC     | Negative | 296.1951 | 3.52 | unknown | 260428    | 84641     | 194861    | 114733    | 108266    | 131500    | 137073    | 160074    | 44382     | 128235    | 68631     | 120957    | 64089     | 72228     | 82544    | 63672    | 81140     | 231824    | 72472     |
| EIC     | Negative | 292.9957 | 1.19 | unknown | 174737    | 156455    | 141994    | 135273    | 110761    | 111170    | 106913    | 127468    | 105080    | 132111    | 99392     | 93932     | 83801     | 82757     | 93259    | 80963    | 90534     | 152898    | 95837     |
| EIC     | Negative | 394.9893 | 0.55 | unknown | 495896    | 214433    | 237950    | 559251    | 182776    | 478325    | 267411    | 143929    | 146649    | 204724    | 282509    | 314306    | 213703    | 62576     | 219924   | 312945   | 164144    | 235528    | 183274    |
| EIC     | Negative | 637.2281 | 1.03 | unknown | 47633     | 27499     | 73836     | 60373     | 24157     | 15038     | 41582     | 45765     | 14406     | 35621     | 44185     | 37248     | 44408     | 14389     | 25736    | 17127    | 18207     | 52997     | 15008     |
| EIC     | Negative | 307.2272 | 5.68 | unknown | 139205    | 61802     | 152852    | 186604    | 71443     | 66248     | 146140    | 56721     | 66248     | 137159    | 57849     | 47072     | 83591     | 21156     | 44015    | 58937    | 63769     | 176883    | 23294     |
| fpHILIC | Negative | 605.4052 | 0.36 | unknown | 1162996   | 1111640   | 1165415   | 798051    | 929489    | 932968    | 1069852   | 1277483   | 750213    | 515647    | 852953    | 929039    | 948944    | 1365283   | 1159566  | 956564   | 708347    | 770755    | 950431    |
| EIC     | Negative | 287.1868 | 2.42 | unknown | 1138761   | 364729    | 1308404   | 722691    | 937429    | 392557    | 621962    | 1083410   | 145638    | 1169547   | 475228    | 485168    | 349105    | 349747    | 419896   | 253886   | 329607    | 928916    | 489618    |
| EIC     | Negative | 389.2464 | 6.24 | unknown | 3805716   | 1603220   | 2774274   | 3779675   | 1040089   | 1277948   | 1515361   | 2275042   | 2020600   | 2733352   | 2182107   | 1118122   | 1676590   | 2119272   | 2315891  | 672120   | 1619670   | 1815966   | 1034721   |
| EIC     | Negative | 556.9982 | 0.55 | unknown | 418536    | 319574    | 294587    | 722647    | 207944    | 611777    | 239392    | 235305    | 214645    | 400456    | 523914    | 353302    | 22883     | 275517    | 362334   | 271406   | 316733    | 2104375   |           |
| fpHILIC | Positive | 468.3080 | 0.61 | unknown | 7234198   | 4351224   | 5986040   | 5017381   | 4396845   | 5118755   | 5765714   | 5340488   | 4239441   | 4622772   | 4370079   | 4099672   | 4736678   | 5007304   | 5081123  | 4559819  | 4092928   | 5049184   | 4032947   |
| EIC     | Negative | 488.2276 | 0.71 | unknown | 298064    | 454624    | 511094    | 290494    | 288885    | 352639    | 456162    | 512771    | 286358    | 300708    | 507526    | 434810    | 361288    | 239432    | 379843   | 282898   | 357348    | 309716    | 314496    |
| EIC     | Negative | 264.8976 | 0.65 | unknown | 339207    | 132638    | 134492    | 280475    | 78552     | 260845    | 141489    | 66248     | 82385     | 159122    | 147271    | 154866    | 115389    | 48532     | 102888   | 151912   | 79219     | 99236     | 145170    |
| EIC     | Negative | 296.2313 | 4.37 | unknown | 1504209   | 1169720   | 2400576   | 1945355   | 1689218   | 1480899   | 1649748   | 2164987   | 1575914   | 1307654   | 1071305   | 1053210   | 1086542   | 2251609   | 695903   | 2037536  | 1959422   | 2079125   | 1469594   |
| EIC     | Negative | 325.2021 | 3.21 | unknown | 275197    | 128979    | 332299    | 230169    | 166357    | 142863    | 187627    | 293158    | 123045    | 242169    | 72466     | 147301    | 136097    | 124137    | 133919   | 148164   | 139099    | 297624    | 121458    |
| EIC     | Negative | 259.1369 | 2.67 | unknown | 107551    | 35758     | 65825     | 65856     | 61453     | 68623     | 64733     | 95017     | 0         | 53630     | 35598     | 46282     | 33593     | 15306     | 55606    | 64223    | 47904     | 75425     | 23596     |
| EIC     | Negative | 437.3276 | 6.39 | unknown | 1324331   | 761978    | 1286110   | 1029596   | 689193    | 483204    | 740682    | 1005303   | 136322    | 804286    | 629579    | 463257    | 514425    | 567226    | 642339   | 526491   | 541158    | 609629    | 491960    |
| EIC     | Negative | 364.2577 | 6.03 | unknown | 688242    | 657227    | 775802    | 714836    | 734046    | 487303    | 516053    | 712154    | 599114    | 870155    | 683400    | 451363    | 501109    | 504029    | 698679   | 467903   | 574052    | 633422    | 432866    |
| fpHILIC | Negative | 91.0041  | 1.74 | unknown | 13006488  | 29188672  | 32070286  | 39799228  | 27621822  | 31001936  | 29773582  | 24785534  | 31667878  | 27058202  | 23561434  | 31579332  | 27761084  | 18416046  | 18835110 | 32436268 | 2551586   | 32060856  | 2451220   |
| fpHILIC | Negative | 283.2642 | 0.37 | unknown | 105968360 | 147370176 | 162834448 | 168016832 | 155205648 | 127696628 | 145729104 | 122019248 | 114836856 | 124983608 | 103378312 | 148941568 | 103959668 | 124561416 | 98332888 | 99494144 | 121759968 | 136244416 | 156522080 |
| EIC     | Negative | 283.1921 | 3.00 | unknown | 242078    | 147472    | 213410    | 386418    | 217132    | 236767    | 299920    | 234927    | 209459    | 298627    | 206135    | 319622    | 345936    | 133110    | 155643   | 254667   | 215064    | 330809    | 151791    |
| fpHILIC | Negative | 78.9189  | 2.10 | unknown | 5796470   | 6094952   | 4817775   | 5410248   | 4954481   | 7217190   | 5417956   | 4496697   | 5608559   | 5002112   | 5995137   | 5273211   | 5845199   | 5543158   | 5633869  | 4748074  | 5264366   | 4595392   | 5273593   |
| EIC     | Negative | 446.3358 | 6.51 | unknown | 1033026   | 1071435   | 1407103   | 1585776   | 1602976   | 605767    | 1330381   | 1427252   | 1158979   | 1332717   | 1254082   | 833547    | 840972    | 691240    | 1101906  | 1409357  | 914299    | 915385    | 807847    |
| EIC     | Negative | 289.1060 | 3.18 | unknown | 885899    | 404932    | 678942    | 1904681   | 430944    | 505450    | 520847    | 691890    | 262554    | 753106    | 381551    | 525234    | 560819    | 175410    | 452823   | 425949   | 339657    | 710855    | 294584    |
| fpHILIC | Positive | 832.5822 | 0.43 | unknown | 6371620   | 10148059  | 5222020   | 5733040   | 7127114   | 8004460   | 8753523   | 5430243   | 5499145   | 5026182   | 7029384   | 7180423   | 7112663   | 6711797   | 6966167  | 6499145  | 7336474   | 4121224   | 6354144   |
| EIC     | Negative | 512.9608 | 4.37 | unknown | 913037    | 1172910   | 896282    | 1212770   | 983250    | 986265    | 1060783   | 981788    | 1008940   | 829499    | 928028    | 850564    | 891140    | 885448    | 973487   | 1043568  | 807943    | 1024563   | 781452    |
| fpHILIC | Negative | 193.0132 | 2.98 | unknown | 3877479   | 3428431   | 2661258   | 4279092   | 2846696   | 4569144   | 3434367   | 1589978   | 2699042   | 3719476   | 3970235   | 3122459   | 880594    | 3402765   | 4403361  | 2639755  | 2015846   | 2023282   |           |
| fpHILIC | Positive | 204.0560 | 3.16 | unknown | 1201577   | 1466366   | 1443584   | 1607818   | 1442187   | 1339411   | 1415418   | 1393552   | 1389984   | 1458607   | 1381872   | 1265126   | 1489422   | 1203881   | 1311174  | 1365104  | 1248801   | 1373121   | 1160573   |
| fpHILIC | Negative | 332.0028 | 2.05 | unknown | 558437    | 759178    | 722347    | 601743    | 662971    | 672203    | 601880    | 601880    | 601880    | 652323    | 640091    | 691365    | 357115    | 303140    | 652323   | 292898   | 393822    | 477118    | 286263    |
| fpHILIC | Positive | 219.1340 | 3.32 | unknown | 574890    | 285942    | 151035    | 200574    | 177154    | 286545    | 232125    | 64936     | 75586     | 192060    | 251556    | 328709    | 84512     | 197369    | 252758   | 261021   | 70597     | 63469     | 124330    |
| EIC     | Negative | 317.2028 | 2.99 | unknown | 0         | 0         | 0         | 259666    | 60671     | 61492     | 0         | 34329     | 0         | 0         | 0         | 0         | 0         | 0         | 0        | 0        | 200386    | 0         | 0         |
| EIC     | Negative | 253.1439 | 3.79 | unknown | 784164    | 841211    | 739287    | 790191    | 766020    | 716975    | 959678    | 672467    | 755328    | 567084    | 772228    | 870556    | 836769    | 841281    | 844206   | 715195   | 585021    | 716849    | 712385    |
| fpHILIC | Negative | 158.0400 | 2.97 | unknown | 1154477   | 1019917   | 908298    | 1106067   | 901285    | 1089601   | 927971    | 1045478   | 851358    | 707371    | 1014090   | 842733    | 861698    | 189403    | 823629   | 1003489  | 755204    | 495608    | 620815    |
| EIC     | Negative | 246.9022 | 1.19 | unknown | 169444    | 87205     | 126284    | 92965     | 80587     | 73446     | 67761     | 54754     | 65516     | 137587    | 50943     | 48213     | 43305     | 82853     | 42951    | 51243    | 36507     | 93112     | 92091     |
| EIC     | Negative | 338.9371 | 0.52 | unknown | 3146530   | 4367897   | 4302741   | 5004598   | 3284943   | 3616312   | 4145375   | 4972988   | 4308380   | 3635656   | 4235366   | 4550498   | 4546384   | 1937972   | 3396167  | 3667221  | 4351653   | 4513530   | 2863544   |
| EIC     | Negative | 610.6760 | 0.52 | unknown | 295981    | 252409    | 479827    | 545302    | 269784    | 329357    | 309902    | 154071    | 539737    | 414811    | 261839    | 266906    | 333923    | 0         | 224070   | 292003   | 280091    | 357218    | 328582    |
| fpHILIC | Negative | 219.0451 | 2.99 | unknown | 2656161   | 2087730   | 3516449   | 1956741   | 1077077   | 2261593   | 2407054   | 856684    | 517178    | 1205755   | 1081837   | 1899940   | 1607705   | 0         | 1038802  | 1389205  | 1138994   | 1751177   | 1489913   |
| EIC     | Negative | 406.2966 | 5.77 | unknown | 321842    | 404247    | 297738    | 374064    | 393856    | 376067    | 360369    | 304995    | 265054    | 297504    | 35241     | 270608    | 3         |           |          |          |           |           |           |

|         |            |          |      |         |          |          |          |          |          |          |          |          |          |          |          |          |          |          |          |          |          |          |          |
|---------|------------|----------|------|---------|----------|----------|----------|----------|----------|----------|----------|----------|----------|----------|----------|----------|----------|----------|----------|----------|----------|----------|----------|
| EIC     | Negative   | 237.1495 | 3.49 | unknown | 143832   | 59576    | 141287   | 187191   | 66140    | 81192    | 92198    | 113196   | 46952    | 113100   | 53628    | 99044    | 83798    | 38005    | 61035    | 63754    | 57320    | 152436   | 37828    |
| EIC     | Negative   | 553.3346 | 4.24 | unknown | 8727865  | 11114114 | 8203213  | 7056937  | 9153923  | 10611284 | 12314262 | 7587574  | 6777794  | 7090394  | 9332622  | 10756093 | 10142709 | 10646159 | 10430991 | 7704811  | 9165396  | 1717621  | 8802941  |
| EIC     | Negative   | 321.2444 | 6.22 | unknown | 1323800  | 640140   | 1455809  | 2439109  | 740506   | 855566   | 623081   | 1135766  | 776261   | 1464071  | 650564   | 941330   | 746221   | 411214   | 437807   | 648457   | 645324   | 1653038  | 465467   |
| EIC     | Negative   | 528.2855 | 3.96 | unknown | 291913   | 415463   | 335445   | 261841   | 294228   | 349381   | 368429   | 277474   | 339700   | 269708   | 319272   | 367381   | 355645   | 419970   | 333650   | 361462   | 285407   | 269052   | 270419   |
| EIC     | Negative   | 235.1339 | 4.12 | unknown | 385000   | 261277   | 461175   | 944065   | 308646   | 235499   | 317458   | 468147   | 204096   | 438856   | 191164   | 202482   | 419371   | 88626    | 171803   | 442662   | 256119   | 500297   | 94212    |
| EIC     | Negative   | 340.9345 | 0.52 | unknown | 2002644  | 2804536  | 2778677  | 3276263  | 2190496  | 2293557  | 2658572  | 3276614  | 2734855  | 2322164  | 2719370  | 2867401  | 2804876  | 775971   | 2220405  | 2438131  | 2851149  | 2879706  | 1886522  |
| EIC     | Negative   | 458.6535 | 0.64 | unknown | 105684   | 58350    | 112544   | 84236    | 111613   | 26877    | 69757    | 44200    | 75357    | 183705   | 44299    | 37286    | 64190    | 213679   | 56647    | 54267    | 32426    | 69534    | 130414   |
| EIC     | Negative   | 480.2998 | 5.09 | unknown | 2226842  | 2357976  | 0        | 0        | 2379587  | 0        | 0        | 0        | 0        | 0        | 2521151  | 0        | 0        | 0        | 0        | 0        | 0        | 2221041  | 0        |
| EIC     | Negative   | 286.7725 | 0.64 | unknown | 179674   | 68314    | 154883   | 117266   | 185946   | 112789   | 120161   | 75122    | 106175   | 271091   | 71836    | 50979    | 87107    | 714953   | 94392    | 81579    | 68096    | 110953   | 205464   |
| EIC     | Negative   | 313.2387 | 6.21 | unknown | 226707   | 114451   | 399453   | 180524   | 137917   | 36397    | 137414   | 277450   | 85142    | 216292   | 117270   | 191093   | 58059    | 57692    | 73315    | 97375    | 84794    | 270539   | 103761   |
| EIC     | Negative   | 248.1370 | 3.70 | unknown | 69704    | 57525    | 148090   | 58287    | 66337    | 106960   | 111254   | 114598   | 0        | 147669   | 138176   | 107198   | 51408    | 70138    | 85559    | 61216    | 69584    | 119951   | 36541    |
| fpHILIC | Negative   | 171.1391 | 0.42 | unknown | 3292160  | 2507721  | 5371245  | 5226317  | 3423119  | 3214635  | 2832643  | 3166549  | 3553713  | 3477521  | 2710566  | 3306524  | 3698037  | 2934866  | 2274903  | 3049538  | 3276743  | 3645840  | 2883775  |
| EIC     | Negative   | 500.2274 | 0.81 | unknown | 141018   | 192947   | 146473   | 88786    | 107523   | 153246   | 166548   | 177936   | 91794    | 121839   | 152560   | 150941   | 161683   | 108796   | 135989   | 118736   | 133085   | 124949   | 138718   |
| EIC     | Negative   | 247.1340 | 3.69 | unknown | 401288   | 272334   | 898997   | 367853   | 371615   | 604657   | 582305   | 674663   | 116650   | 835995   | 819168   | 626695   | 256174   | 374743   | 485747   | 361107   | 426731   | 720511   | 203159   |
| EIC     | Negative   | 329.2333 | 6.05 | unknown | 1048525  | 415954   | 1116313  | 815791   | 399064   | 287171   | 389475   | 869925   | 217207   | 854327   | 392861   | 310775   | 363188   | 271727   | 454389   | 242164   | 285952   | 625736   | 414579   |
| EIC     | Negative   | 238.1460 | 2.16 | unknown | 124467   | 87239    | 77402    | 306019   | 85382    | 93624    | 94775    | 75376    | 92660    | 129534   | 84121    | 172203   | 84625    | 51187    | 80671    | 93054    | 91941    | 111808   | 72169    |
| EIC     | Negative   | 285.2072 | 2.28 | unknown | 122316   | 69471    | 127357   | 80859    | 82316    | 86064    | 102870   | 75272    | 75736    | 92660    | 56695    | 83935    | 76514    | 62894    | 53716    | 100601   | 66652    | 109469   | 74631    |
| EIC     | Negative   | 311.9939 | 1.19 | unknown | 103956   | 93622    | 88610    | 87892    | 81388    | 84519    | 89348    | 93181    | 79307    | 80861    | 86229    | 75752    | 77078    | 72566    | 76371    | 68602    | 73947    | 107511   | 68614    |
| EIC     | Negative   | 634.3348 | 3.96 | unknown | 627737   | 1011643  | 644641   | 575851   | 777513   | 804317   | 904796   | 653712   | 827527   | 620285   | 775910   | 840355   | 850881   | 1043440  | 919459   | 828199   | 716153   | 550631   | 698426   |
| EIC     | Negative   | 552.3313 | 4.24 | unknown | 29123374 | 37289486 | 28179852 | 23873428 | 30434928 | 35287638 | 41057897 | 25504885 | 2156427  | 23865246 | 31918226 | 36428756 | 34212434 | 36437380 | 34950744 | 25717915 | 30999377 | 24043419 | 29753094 |
| fpHILIC | Positive   | 141.0539 | 2.67 | unknown | 1105104  | 271498   | 80679    | 161878   | 209947   | 474059   | 0        | 258805   | 436922   | 158067   | 74561    | 350321   | 243149   | 349822   | 47298    | 318956   | 306535   | 416835   | 208912   |
| fpHILIC | Negative   | 168.0244 | 2.98 | unknown | 9669978  | 8683618  | 9676929  | 11285640 | 6089937  | 8054700  | 7389834  | 5297628  | 5872444  | 6200062  | 7409801  | 7008146  | 7589817  | 3042908  | 4722958  | 6106222  | 7065607  | 7394809  | 5330230  |
| EIC     | Negative   | 570.3417 | 4.05 | unknown | 2314717  | 2416954  | 2101681  | 1989949  | 1818879  | 2300406  | 1890286  | 2127134  | 1441722  | 2101312  | 1985547  | 1933761  | 1896083  | 1736222  | 1714070  | 1828994  | 1823130  | 1789930  | 2114932  |
| EIC     | Negative   | 312.9867 | 0.55 | unknown | 582784   | 211095   | 226870   | 560892   | 144223   | 495385   | 241267   | 118463   | 140106   | 250765   | 258980   | 185312   | 46686    | 216894   | 293913   | 136888   | 199655   | 219970   | 0        |
| EIC     | Negative   | 229.1810 | 3.83 | unknown | 123991   | 90888    | 135601   | 305963   | 94698    | 78639    | 95390    | 109672   | 118201   | 146085   | 76833    | 98514    | 145318   | 54656    | 58825    | 143154   | 93284    | 116351   | 53702    |
| EIC     | Negative   | 339.2123 | 5.49 | unknown | 358691   | 130633   | 289757   | 325663   | 152519   | 125816   | 218305   | 186203   | 151345   | 250262   | 179455   | 113235   | 180562   | 228274   | 284285   | 64526    | 202006   | 116550   | 114560   |
| fpHILIC | Negative   | 235.0811 | 1.89 | unknown | 737688   | 213077   | 510950   | 499070   | 224936   | 488442   | 320813   | 410317   | 455051   | 404151   | 366649   | 616519   | 208177   | 280216   | 202910   | 514822   | 168149   | 466501   | 428821   |
| EIC     | Negative   | 470.2164 | 0.82 | unknown | 76741    | 98774    | 110167   | 56890    | 60573    | 79417    | 101647   | 85581    | 78756    | 108386   | 66730    | 67575    | 69619    | 82521    | 65399    | 70032    | 70632    | 80937    | 80837    |
| EIC     | Negative   | 338.2415 | 3.54 | unknown | 140271   | 103708   | 138886   | 390312   | 121943   | 119019   | 119843   | 178089   | 156735   | 177457   | 109289   | 196669   | 152476   | 61263    | 82010    | 136743   | 111805   | 245474   | 76480    |
| EIC     | Negative   | 284.7750 | 0.64 | unknown | 269796   | 97240    | 229380   | 179544   | 277448   | 158128   | 174074   | 105373   | 162367   | 491190   | 105499   | 83148    | 128003   | 1048194  | 142983   | 126110   | 92599    | 158422   | 320410   |
| fpHILIC | Positive   | 186.1123 | 2.36 | unknown | 796666   | 973846   | 806057   | 860133   | 801426   | 833568   | 839420   | 675790   | 916199   | 1008676  | 1068862  | 941786   | 1016629  | 786639   | 618047   | 986527   | 829725   | 558844   | 821580   |
| fpHILIC | Negative   | 239.0774 | 3.19 | unknown | 675237   | 734642   | 751162   | 942997   | 683687   | 676485   | 836592   | 605430   | 658427   | 634989   | 735697   | 571767   | 695584   | 390430   | 598477   | 591994   | 716164   | 782446   | 614012   |
| EIC     | Negative   | 616.4305 | 2.72 | unknown | 315571   | 210258   | 197921   | 601619   | 318410   | 203445   | 241815   | 224897   | 261654   | 372820   | 195055   | 247289   | 288511   | 111938   | 146153   | 286725   | 273349   | 365820   | 101694   |
| EIC     | Negative   | 578.3390 | 4.01 | unknown | 2927340  | 3890580  | 2966512  | 3349669  | 3146451  | 3392449  | 3846098  | 3178931  | 2951228  | 2529015  | 3820439  | 3913471  | 3215422  | 3450718  | 3357374  | 3232110  | 3111435  | 2464832  | 3351693  |
| EIC     | Negative   | 389.2728 | 5.84 | unknown | 567579   | 547377   | 587352   | 660432   | 156887   | 168027   | 748928   | 632102   | 158895   | 2320467  | 497579   | 153958   | 165460   | 591454   | 633745   | 637445   | 148171   | 475930   | 142422   |
| EIC     | Negative   | 286.2474 | 4.74 | unknown | 106223   | 81729    | 213382   | 221660   | 134786   | 85428    | 123429   | 238945   | 132187   | 123817   | 78983    | 84009    | 105892   | 139304   | 87230    | 85319    | 129490   | 237256   | 131988   |
| EIC     | Negative   | 502.2845 | 5.24 | unknown | 1100323  | 924387   | 944824   | 0        | 901846   | 0        | 803616   | 0        | 0        | 0        | 631099   | 0        | 0        | 0        | 0        | 0        | 742354   | 0        | 859592   |
| EIC     | Negative   | 316.2572 | 3.54 | unknown | 161099   | 158367   | 157131   | 160446   | 160886   | 163080   | 154075   | 146513   | 149343   | 148467   | 145984   | 146709   | 155124   | 142570   | 144419   | 150460   | 146968   | 142330   | 141822   |
| EIC     | Negative   | 248.8995 | 1.19 | unknown | 105042   | 54906    | 80508    | 57449    | 51230    | 46916    | 44017    | 53996    | 52130    | 32380    | 42152    | 26136    | 52829    | 67114    | 52829    | 2470     | 25374    | 55876    | 61114    |
| fpHILIC | Positive   | 157.0749 | 2.61 | unknown | 1215391  | 1367324  | 1186565  | 1033447  | 1074021  | 1475213  | 1304342  | 928573   | 1003229  | 1037746  | 1402534  | 1205343  | 1062447  | 1240779  | 1228636  | 1041928  | 1301348  | 1089205  | 1063139  |
| fpHILIC | Positive   | 760.5779 | 0.44 | unknown | 22934636 | 25387116 | 23908926 | 19226456 | 20901790 | 19709264 | 18279486 | 20215376 | 27668799 | 18671904 | 23210516 | 21868918 | 19192314 | 28839220 | 22420734 | 18874560 | 19589230 | 16674183 | 22788944 |
| EIC     | Negative   | 310.9892 | 0.55 | unknown | 1811844  | 605143   | 742548   | 1616113  | 497368   | 1548781  | 764959   | 325703   | 415703   | 775726   | 768826   | 827610   | 586817   | 310001   | 657389   | 942879   | 424698   | 613052   | 701164   |
| EIC     | Negative   | 244.1998 | 4.13 | unknown | 63976    | 61845    | 69179    | 69393    | 63976    | 61845    | 69179    | 73160    | 69393    | 71201    | 58653    | 72765    | 73575    | 57762    | 69401    | 63803    | 90554    | 43284    | 43284    |
| EIC     | Negative   | 275.1268 | 3.48 | unknown | 167447   | 99159    | 124951   | 141880   | 105874   | 80923    | 84668    | 89587    | 41479    | 124802   | 75782    | 91498    | 83242    | 54787    | 77460    | 90793    | 54340    | 110477   | 45406    |
| EIC     | Negative   | 296.9919 | 1.19 | unknown | 420892   | 426183   | 388577   | 377124   | 385254   | 398955   | 394003   | 385620   | 381116   | 388577   | 396640   | 391100   | 359705   | 371675   | 371343   | 351831   | 373675   | 359733   | 372240   |
| EIC     | Negative   | 318.8873 | 0.52 | unknown | 756665   | 731796   | 1095653  | 1127670  | 751521   | 793744   | 805420   | 693445   | 963636   | 792637   | 740175   | 808320   | 864116   | 321997   | 739064   | 813971   | 721061   | 880094   | 614571   |
| EIC     | Negative   | 251.1323 | 3.18 | unknown | 355339   | 0        | 0        | 0        | 0        | 282141   | 0        | 0        | 0        | 0        | 0        | 0        | 410058   | 0        | 0        | 0        | 265342   | 0        | 0        |
| EIC     | Negative   | 581.2410 | 2.93 | unknown | 1981133  | 1179066  | 1002934  | 1514658  | 501999   | 1031321  | 604992   | 1725324  | 385828   | 2973568  | 904377   | 1140000  | 1109187  | 169505   | 350509   | 1181576  | 517431   | 1594646  | 352368   |
| fpHILIC | Negative   | 80.9169  | 2.10 | unknown | 5687029  | 6476060  | 5036893  | 5961009  | 4995333  | 7158834  | 5607138  | 4623500  | 5662901  | 5135114  | 6287215  | 5867647  | 6310368  | 5704582  | 5838500  | 4749240  | 5422366  | 4861904  | 5512702  |
| EIC     | Negative</ |          |      |         |          |          |          |          |          |          |          |          |          |          |          |          |          |          |          |          |          |          |          |

|         |          |          |      |         |          |          |          |          |          |          |          |          |          |          |          |          |          |          |          |          |          |          |          |
|---------|----------|----------|------|---------|----------|----------|----------|----------|----------|----------|----------|----------|----------|----------|----------|----------|----------|----------|----------|----------|----------|----------|----------|
| EIC     | Negative | 258.9312 | 0.52 | unknown | 1349943  | 1589103  | 1815562  | 2094668  | 1380903  | 1420654  | 1506263  | 1579646  | 1641895  | 1388683  | 1540320  | 1548420  | 1610959  | 695769   | 1370033  | 1469530  | 1472263  | 1680940  | 1132168  |
| EIC     | Negative | 237.1495 | 4.69 | unknown | 836325   | 236083   | 898131   | 881413   | 295790   | 454997   | 362364   | 578814   | 193648   | 618998   | 271617   | 569425   | 423423   | 101005   | 288649   | 287156   | 342796   | 639182   | 226676   |
| EIC     | Negative | 398.8929 | 0.52 | unknown | 1218796  | 1623102  | 1875928  | 2108954  | 1278671  | 1521618  | 1569558  | 1577773  | 1710791  | 1329723  | 1596646  | 1696650  | 1634412  | 497810   | 1340477  | 1710236  | 1572536  | 1688971  | 1063441  |
| EIC     | Negative | 300.2566 | 4.40 | unknown | 1906802  | 1753036  | 1778316  | 1739286  | 1814431  | 1562566  | 1527524  | 1718432  | 1691683  | 1833229  | 1423304  | 1431283  | 1608591  | 1578089  | 1530097  | 1500234  | 1551702  | 1764503  | 1522495  |
| fpHILIC | Positive | 276.1549 | 4.03 | unknown | 957357   | 344799   | 511881   | 1062036  | 469745   | 598908   | 469745   | 400292   | 562896   | 516856   | 797709   | 851211   | 526309   | 323921   | 338553   | 713941   | 390436   | 363153   | 447135   |
| EIC     | Negative | 268.0978 | 1.76 | unknown | 101472   | 77439    | 145953   | 99004    | 60569    | 73659    | 60823    | 55584    | 69914    | 96458    | 73731    | 80433    | 82329    | 111689   | 98033    | 70075    | 74018    | 0        | 61365    |
| EIC     | Negative | 277.1555 | 4.08 | unknown | 0        | 0        | 0        | 1065283  | 0        | 0        | 395001   | 412024   | 562194   | 461453   | 325784   | 473162   | 475657   | 0        | 0        | 394570   | 350274   | 551738   | 0        |
| EIC     | Negative | 363.2545 | 6.03 | unknown | 2688011  | 2690105  | 3159541  | 2975963  | 2978323  | 1907768  | 2061278  | 2950733  | 2404241  | 3584187  | 2844099  | 1816399  | 2113219  | 2161811  | 2917969  | 2001938  | 2337578  | 2564535  | 1831464  |
| fpHILIC | Negative | 582.3404 | 0.58 | unknown | 18305818 | 20945290 | 18954646 | 12989921 | 15672723 | 20518288 | 21496966 | 15612538 | 15128867 | 12953465 | 18965544 | 19751158 | 17445396 | 17069846 | 19568376 | 16219472 | 16796432 | 12638768 | 18588328 |
| EIC     | Negative | 343.1543 | 2.84 | unknown | 240774   | 337923   | 254507   | 163081   | 271019   | 218240   | 310419   | 90723    | 147224   | 126755   | 143916   | 243639   | 144088   | 200554   | 321142   | 253911   | 143336   | 43489    | 221548   |
| fpHILIC | Positive | 131.0531 | 3.47 | unknown | 7743326  | 5660131  | 6650137  | 6350943  | 5745405  | 6024646  | 5923773  | 6157616  | 6239970  | 5936638  | 6140627  | 5796029  | 5340475  | 5018245  | 6474518  | 4941637  | 6099349  | 6118190  | 4902959  |
| EIC     | Negative | 1837.215 | 2.38 | unknown | 1837215  | 2338936  | 1820487  | 1493593  | 1891847  | 2220444  | 2529323  | 1698592  | 1441188  | 1533580  | 1962006  | 2280375  | 2119957  | 2267378  | 2292480  | 1571727  | 1953764  | 1575904  | 1884213  |
| fpHILIC | Negative | 182.0318 | 3.03 | unknown | 2445789  | 1428632  | 1440867  | 1675770  | 1129646  | 1148513  | 956741   | 1208585  | 1191205  | 1563704  | 1184565  | 1043965  | 1116733  | 1099824  | 1247846  | 996897   | 1169939  | 1035872  | 894889   |
| fpHILIC | Positive | 358.1633 | 3.47 | unknown | 2819409  | 1888881  | 2480313  | 2646259  | 2230605  | 2328876  | 2382898  | 2768048  | 2403803  | 2653747  | 2659292  | 2296246  | 2446606  | 1994463  | 2658400  | 2548778  | 2300763  | 2582510  | 1408020  |
| EIC     | Negative | 256.9340 | 0.52 | unknown | 2003816  | 2381305  | 2762636  | 3142147  | 2163800  | 2244063  | 2324956  | 2430118  | 2524547  | 2142400  | 2335964  | 2401761  | 2410344  | 1055027  | 2117815  | 2363367  | 2329477  | 2538843  | 1744177  |
| EIC     | Negative | 361.2389 | 5.27 | unknown | 696040   | 455123   | 715863   | 726907   | 490916   | 374696   | 542009   | 417716   | 859814   | 297150   | 324271   | 368968   | 264658   | 494671   | 349017   | 336418   | 326212   | 231390   | 0        |
| EIC     | Negative | 326.2217 | 6.21 | unknown | 765667   | 2725178  | 760525   | 2792022  | 1736726  | 1537670  | 1455990  | 1041349  | 2778171  | 1306993  | 1861373  | 1467594  | 2758086  | 1173032  | 1502586  | 2090335  | 1901825  | 1286168  | 1337695  |
| EIC     | Negative | 486.6876 | 0.52 | unknown | 164807   | 29643    | 163930   | 0        | 139884   | 93816    | 0        | 97608    | 0        | 194677   | 58594    | 0        | 76308    | 215076   | 51732    | 49780    | 257324   | 30158    | 156749   |
| EIC     | Negative | 256.8834 | 0.62 | unknown | 121314   | 49634    | 32730    | 78642    | 35434    | 118258   | 61833    | 18844    | 33704    | 42099    | 64230    | 64360    | 48944    | 32409    | 59158    | 73587    | 33900    | 34559    | 53422    |
| EIC     | Negative | 251.1268 | 3.18 | unknown | 415518   | 314530   | 525361   | 441470   | 346921   | 297112   | 413506   | 350831   | 171733   | 321045   | 329495   | 349068   | 511772   | 200390   | 312674   | 330115   | 283759   | 360668   | 213336   |
| fpHILIC | Positive | 761.5842 | 0.44 | unknown | 7139867  | 8331139  | 7556628  | 6917559  | 7112125  | 5996955  | 6423026  | 6861097  | 8948146  | 6078820  | 7426649  | 7317849  | 6668295  | 8859416  | 7468799  | 6262444  | 7091169  | 5522027  | 7232476  |
| EIC     | Negative | 452.9477 | 0.55 | unknown | 420307   | 140309   | 207775   | 363636   | 114508   | 380095   | 192690   | 88725    | 119859   | 919637   | 185941   | 200905   | 158925   | 27528    | 141938   | 240323   | 113367   | 151547   | 203836   |
| EIC     | Negative | 284.1954 | 2.67 | unknown | 70267    | 46871    | 48063    | 89450    | 38644    | 62927    | 57632    | 64413    | 43919    | 105926   | 64860    | 116089   | 74560    | 58963    | 48088    | 58943    | 55899    | 47102    | 44104    |
| EIC     | Negative | 516.2736 | 3.11 | unknown | 650860   | 338521   | 400735   | 480815   | 237716   | 513106   | 217289   | 442291   | 349512   | 496790   | 248320   | 338722   | 270523   | 222139   | 347255   | 327469   | 474814   | 0        | 522275   |
| EIC     | Negative | 400.6941 | 0.64 | unknown | 108734   | 58101    | 118430   | 84004    | 124796   | 71316    | 80107    | 46858    | 72540    | 192601   | 45046    | 36039    | 59926    | 289304   | 65016    | 59553    | 41458    | 77714    | 132158   |
| EIC     | Negative | 571.3451 | 4.05 | unknown | 684699   | 701429   | 603909   | 618578   | 551916   | 682658   | 567207   | 625519   | 426483   | 628023   | 588033   | 583233   | 578276   | 498055   | 518243   | 538605   | 583619   | 532746   | 539594   |
| EIC     | Negative | 265.1811 | 2.99 | unknown | 400336   | 220885   | 467966   | 587440   | 288356   | 369031   | 354390   | 427652   | 240017   | 494711   | 299089   | 532678   | 425364   | 225318   | 234655   | 354986   | 251383   | 550259   | 205498   |
| EIC     | Negative | 596.8132 | 0.52 | unknown | 480198   | 683648   | 845960   | 988609   | 524854   | 673725   | 660501   | 629886   | 808708   | 783847   | 755392   | 759821   | 762498   | 0        | 565370   | 746226   | 672141   | 733707   | 418665   |
| fpHILIC | Positive | 106.1110 | 4.07 | unknown | 648541   | 498220   | 471650   | 395026   | 373151   | 531501   | 528722   | 472718   | 372530   | 385762   | 267884   | 321925   | 349372   | 297515   | 524595   | 526322   | 334236   | 412730   | 370653   |
| EIC     | Negative | 386.2374 | 5.75 | unknown | 4460559  | 2437845  | 3925388  | 6324819  | 2228678  | 2518606  | 2459382  | 3112789  | 2634885  | 3682629  | 2475708  | 2751223  | 2538050  | 1698842  | 1941293  | 2643678  | 2121551  | 3979416  | 1653652  |
| EIC     | Negative | 287.1868 | 2.46 | unknown | 947351   | 303459   | 1048549  | 675531   | 409984   | 388276   | 487121   | 1090865  | 173205   | 1042744  | 403099   | 406220   | 346470   | 346706   | 359474   | 288874   | 354723   | 969130   | 458390   |
| EIC     | Negative | 571.3450 | 4.18 | unknown | 4303352  | 4012269  | 3906674  | 4044177  | 3339140  | 3999165  | 3538346  | 3975959  | 2810688  | 4088616  | 3881140  | 3449663  | 3396931  | 2952049  | 2800110  | 3453160  | 3388303  | 3593550  | 3605994  |
| EIC     | Negative | 634.3345 | 4.23 | unknown | 1367962  | 1430809  | 1190528  | 943500   | 1299759  | 1276087  | 1572033  | 1089109  | 1106862  | 7070817  | 1340130  | 1481360  | 1522019  | 1593278  | 1576535  | 1088792  | 1166696  | 1060474  | 1196479  |
| EIC     | Negative | 356.2172 | 3.26 | unknown | 406547   | 75297    | 440672   | 841017   | 80608    | 123663   | 123222   | 250064   | 29235    | 273826   | 64753    | 108472   | 62408    | 81035    | 73915    | 29541    | 68710    | 316680   | 89979    |
| fpHILIC | Positive | 782.5682 | 0.43 | unknown | 81311248 | 94635952 | 81127816 | 18131860 | 72673336 | 73059496 | 72851776 | 91005296 | 67151640 | 78715832 | 78400448 | 76300464 | 90854856 | 67701664 | 72443888 | 77611784 | 63109884 | 83137664 | 0        |
| EIC     | Negative | 339.2539 | 3.83 | unknown | 94110    | 81283    | 178361   | 460579   | 60664    | 94521    | 76141    | 170851   | 110152   | 164846   | 99677    | 155117   | 136626   | 43238    | 36476    | 127437   | 88480    | 185970   | 50978    |
| EIC     | Negative | 284.7750 | 0.52 | unknown | 408102   | 109296   | 311301   | 113007   | 397340   | 240719   | 209842   | 91158    | 178307   | 103017   | 140858   | 146760   | 2121643  | 167177   | 167312   | 77643    | 190527   | 507969   | 0        |
| fpHILIC | Negative | 182.8247 | 2.10 | unknown | 697112   | 1100155  | 885346   | 948344   | 672406   | 746892   | 648829   | 928430   | 599982   | 1142733  | 905791   | 858283   | 612245   | 1136699  | 1096492  | 286640   | 706222   | 577699   | 769535   |
| fpHILIC | Negative | 269.2486 | 0.37 | unknown | 4060133  | 5860224  | 6752783  | 7580689  | 6182097  | 4734293  | 5562824  | 6367801  | 4712459  | 4306710  | 5272385  | 5475789  | 4291966  | 4104772  | 6037802  | 5160162  | 5292955  | 5903772  | 6147830  |
| EIC     | Negative | 457.1721 | 3.26 | unknown | 133826   | 135071   | 173406   | 442695   | 62996    | 117849   | 82246    | 40075    | 33345    | 159483   | 77524    | 49483    | 19182    | 8321     | 88768    | 126597   | 43825    | 47284    | 15105    |
| EIC     | Negative | 570.3417 | 4.18 | unknown | 14688244 | 13531302 | 13232176 | 13726111 | 11418494 | 13335958 | 11605781 | 13412004 | 9566463  | 13547040 | 13092752 | 11570324 | 11687660 | 10067954 | 9627544  | 11291522 | 11337871 | 12275518 | 12183640 |
| EIC     | Negative | 337.2328 | 2.15 | unknown | 1704757  | 1502139  | 1423958  | 1665160  | 1533040  | 1476893  | 1609414  | 1505349  | 1472142  | 1499866  | 1476863  | 1558925  | 1481742  | 1487295  | 1460483  | 1452536  | 1517455  | 1299050  | 1530374  |
| EIC     | Negative | 577.3347 | 4.01 | unknown | 13705935 | 18151230 | 13489229 | 15338190 | 13406625 | 14704075 | 17307855 | 15028763 | 13372471 | 10799561 | 17041248 | 18398447 | 14754738 | 15932822 | 14994885 | 14096628 | 14559527 | 11112310 | 1586547  |
| EIC     | Negative | 324.5560 | 4.01 | unknown | 377396   | 356352   | 326463   | 293696   | 356589   | 0        | 345996   | 12597    | 328680   | 317674   | 306069   | 323828   | 316982   | 341410   | 330217   | 0        | 0        | 351762   | 316046   |
| fpHILIC | Positive | 224.1188 | 2.72 | unknown | 620840   | 520827   | 828656   | 972723   | 547204   | 547513   | 768783   | 578241   | 394112   | 924279   | 413157   | 473369   | 548284   | 277053   | 484377   | 490462   | 584028   | 716621   | 436074   |
| EIC     | Negative | 342.2731 | 6.20 | unknown | 754267   | 541010   | 1122925  | 1059777  | 504176   | 387694   | 563398   | 566356   | 461810   | 528246   | 446348   | 583139   | 551801   | 363604   | 334721   | 466301   | 467764   | 862598   | 329911   |
| fpHILIC | Negative | 157.0366 | 2.97 | unknown | 24738772 | 21909210 | 19905114 | 24463130 | 17039328 | 25508022 | 20372286 | 9582873  | 17114652 | 18164308 | 21444108 | 22394824 | 18968772 | 5525035  | 19303838 | 23779088 | 16258658 | 12578000 | 13776961 |
| EIC     | Negative | 577.3347 | 3.91 | unknown | 3393976  | 5074447  | 5172705  | 3345767  | 3547     |          |          |          |          |          |          |          |          |          |          |          |          |          |          |

|         |          |          |      |         |            |           |           |           |           |           |           |           |           |           |           |           |           |           |           |           |           |           |          |
|---------|----------|----------|------|---------|------------|-----------|-----------|-----------|-----------|-----------|-----------|-----------|-----------|-----------|-----------|-----------|-----------|-----------|-----------|-----------|-----------|-----------|----------|
| EIC     | Negative | 335.1415 | 3.65 | unknown | 645414     | 640326    | 480198    | 537287    | 566585    | 498637    | 559162    | 600945    | 592327    | 633655    | 545181    | 558868    | 506386    | 516865    | 534204    | 530090    | 373081    | 643405    | 627218   |
| EIC     | Negative | 570.9313 | 0.55 | unknown | 76468      | 75790     | 92048     | 112093    | 69435     | 19594     | 88659     | 134285    | 94081     | 43619     | 67296     | 69612     | 79242     | 0         | 51159     | 107402    | 92475     | 139513    | 0        |
| EIC     | Negative | 281.1765 | 2.93 | unknown | 765906     | 159623    | 584982    | 418603    | 189567    | 199301    | 193190    | 376429    | 158275    | 748107    | 138988    | 194400    | 152912    | 185972    | 229459    | 142532    | 167075    | 380019    | 155148   |
| EIC     | Negative | 315.2090 | 6.47 | unknown | 2987879    | 2783311   | 2828772   | 3240623   | 2795256   | 2625800   | 2391532   | 2518183   | 2165869   | 2890077   | 2336094   | 2146091   | 2143998   | 2210631   | 2357846   | 2388311   | 2275355   | 2493436   | 2508476  |
| EIC     | Negative | 439.2618 | 2.35 | unknown | 8484156    | 385132    | 684068    | 899831    | 351807    | 373755    | 359758    | 1083717   | 2166161   | 948797    | 332718    | 346056    | 341367    | 310664    | 344706    | 346226    | 328109    | 1018329   | 367153   |
| EIC     | Negative | 276.1305 | 3.33 | unknown | 135692     | 119295    | 88791     | 113945    | 119319    | 107780    | 102202    | 113138    | 54186     | 96222     | 102554    | 102447    | 110180    | 56630     | 99932     | 117564    | 73113     | 112194    | 75288    |
| EIC     | Negative | 298.2108 | 3.82 | unknown | 406598     | 122447    | 537934    | 455722    | 191213    | 190185    | 193993    | 400694    | 196598    | 486122    | 158407    | 185189    | 160780    | 197812    | 151106    | 154353    | 189816    | 490847    | 142795   |
| EIC     | Negative | 291.1965 | 3.23 | unknown | 168864     | 118128    | 153272    | 294289    | 117249    | 133480    | 146587    | 180613    | 133700    | 187899    | 125768    | 180008    | 173967    | 113929    | 114247    | 140180    | 148624    | 190008    | 92039    |
| fpHILIC | Positive | 230.0956 | 3.34 | unknown | 10496189   | 6227775   | 8161470   | 8978708   | 8102839   | 7671957   | 7716241   | 8056787   | 8341155   | 8371518   | 6916965   | 6754102   | 7313328   | 8321460   | 8018217   | 5750756   | 8002922   | 8260671   | 8375699  |
| EIC     | Positive | 461.2908 | 6.00 | unknown | 11479961   | 22526932  | 10015840  | 35744784  | 10511666  | 21765913  | 14303984  | 13567986  | 21345421  | 21965695  | 23880029  | 7868379   | 17692498  | 19949010  | 20805648  | 7838748   | 25380814  | 9623141   | 14826780 |
| EIC     | Negative | 343.0627 | 0.50 | unknown | 307601     | 248208    | 340255    | 240586    | 191003    | 220743    | 257948    | 220767    | 328476    | 290178    | 260388    | 225935    | 209001    | 0         | 196003    | 276946    | 216265    | 253710    | 231254   |
| EIC     | Negative | 399.1175 | 0.83 | unknown | 65257      | 65241     | 121298    | 113218    | 51764     | 30229     | 80330     | 84195     | 40590     | 77047     | 77462     | 69229     | 82983     | 15387     | 34808     | 61055     | 54931     | 99932     | 25875    |
| EIC     | Negative | 576.3314 | 3.91 | unknown | 10798178   | 16207639  | 16495186  | 10419022  | 11132266  | 14839962  | 11969634  | 12236321  | 7624738   | 8597675   | 14071757  | 11612849  | 10832806  | 19489138  | 10731994  | 7852659   | 10433132  | 10780498  | 15899639 |
| fpHILIC | Negative | 218.0519 | 2.99 | unknown | 548073     | 403229    | 861372    | 316299    | 202542    | 416959    | 495272    | 175969    | 146890    | 262828    | 317489    | 324313    | 263193    | 112684    | 187568    | 260845    | 261156    | 341493    | 334650   |
| EIC     | Negative | 280.1887 | 3.78 | unknown | 238878     | 94844     | 156869    | 0         | 102032    | 149732    | 106898    | 160218    | 61752     | 157195    | 99684     | 135714    | 0         | 0         | 146146    | 111259    | 0         | 200230    | 102109   |
| EIC     | Negative | 598.8083 | 0.52 | unknown | 292741     | 444961    | 558003    | 559463    | 322256    | 422904    | 380716    | 412837    | 509511    | 498260    | 434244    | 454647    | 480686    | 0         | 333780    | 475729    | 423655    | 476757    | 249422   |
| EIC     | Negative | 255.1604 | 2.37 | unknown | 942665     | 451621    | 850489    | 882906    | 449287    | 669090    | 477582    | 711340    | 303018    | 849121    | 332740    | 507186    | 476026    | 396335    | 507810    | 418536    | 379015    | 855032    | 374970   |
| EIC     | Negative | 602.3469 | 4.52 | unknown | 1917986254 | 191602547 | 180110021 | 187803116 | 183787164 | 188792978 | 192400595 | 182918750 | 175485655 | 185411363 | 200983154 | 188987559 | 180805149 | 193049840 | 176330732 | 183840269 | 174701506 | 190179998 |          |
| EIC     | Negative | 579.3437 | 4.01 | unknown | 470848     | 641943    | 529692    | 562895    | 480308    | 557693    | 610922    | 542687    | 488549    | 387705    | 537087    | 730647    | 556599    | 638680    | 534285    | 482728    | 555435    | 383545    | 629645   |
| fpHILIC | Positive | 219.1418 | 2.04 | unknown | 1593298    | 1611733   | 1797718   | 1267888   | 1163626   | 1907984   | 1285342   | 1155871   | 1167361   | 959733    | 1506662   | 1411571   | 1012469   | 1799230   | 1755527   | 1085542   | 59154     | 1063965   | 1581435  |
| EIC     | Negative | 240.1685 | 3.03 | unknown | 111473     | 96200     | 206970    | 159854    | 93468     | 105908    | 96149     | 138918    | 99704     | 518663    | 88236     | 103599    | 94542     | 190511    | 63859     | 63254     | 104613    | 174584    | 109192   |
| EIC     | Negative | 566.3470 | 4.94 | unknown | 1075205    | 1359322   | 1135022   | 879899    | 1092287   | 1275842   | 1290881   | 983052    | 608592    | 934623    | 1192303   | 1154753   | 1055865   | 1000556   | 1265339   | 608950    | 937498    | 761269    | 1206779  |
| fpHILIC | Negative | 326.1278 | 3.42 | unknown | 1361472    | 1072343   | 1264023   | 1534206   | 1050785   | 948891    | 1017536   | 1162431   | 1037104   | 1175491   | 1097503   | 1089507   | 1038580   | 813665    | 948471    | 1052837   | 941511    | 1245326   | 849520   |
| fpHILIC | Positive | 197.0880 | 2.93 | unknown | 583323     | 619797    | 587496    | 476488    | 418134    | 724098    | 539640    | 490035    | 321533    | 523380    | 683463    | 632291    | 537604    | 381634    | 520437    | 537470    | 474282    | 442037    | 433706   |
| EIC     | Negative | 604.3350 | 4.52 | unknown | 14688276   | 14098235  | 13968243  | 14041059  | 13689244  | 14806530  | 13927909  | 14985305  | 14154828  | 13371341  | 13790545  | 15332405  | 14016320  | 13658646  | 14337397  | 12974265  | 14599378  | 12785090  | 14418239 |
| EIC     | Negative | 528.3064 | 4.52 | unknown | 1788712    | 1724117   | 1635815   | 1508404   | 1468059   | 1498451   | 1516535   | 1882006   | 1423908   | 1563786   | 1623229   | 12975058  | 1171801   | 1607815   | 1662720   | 1520316   | 1570543   | 1252554   | 1524696  |
| EIC     | Negative | 562.9574 | 5.02 | unknown | 556219     | 674486    | 582559    | 699138    | 553698    | 644189    | 598543    | 596650    | 616643    | 500750    | 597419    | 590090    | 539745    | 569985    | 630851    | 639563    | 549406    | 597775    | 490113   |
| EIC     | Negative | 239.1652 | 3.02 | unknown | 711676     | 608919    | 1252931   | 1068547   | 586159    | 624768    | 571787    | 944013    | 660897    | 998888    | 589158    | 639720    | 542225    | 1265246   | 401814    | 415373    | 663082    | 1064851   | 727901   |
| EIC     | Negative | 371.1350 | 1.62 | unknown | 231562     | 264793    | 314345    | 0         | 127306    | 360283    | 425377    | 245530    | 103802    | 262663    | 234893    | 193716    | 122247    | 527942    | 300867    | 125208    | 117585    | 116302    | 269826   |
| EIC     | Negative | 325.2183 | 6.21 | unknown | 3056075    | 11368396  | 3033191   | 11314347  | 6712417   | 6202671   | 5895218   | 4249401   | 11108488  | 5336746   | 7488260   | 5930366   | 11310621  | 4639158   | 6129476   | 8521772   | 7161819   | 5180871   | 5580689  |
| EIC     | Negative | 402.2952 | 6.29 | unknown | 304922     | 329030    | 361356    | 123460    | 45104     | 362549    | 369314    | 156170    | 43992     | 257803    | 285424    | 196437    | 194081    | 340962    | 422419    | 0         | 311711    | 61230     | 149399   |
| EIC     | Negative | 311.2593 | 6.50 | unknown | 1007123    | 764099    | 1761020   | 3977868   | 974061    | 726447    | 1079552   | 1379291   | 1028628   | 1617436   | 1923516   | 1633483   | 1418198   | 465008    | 538057    | 1239946   | 1084093   | 1540435   | 615282   |
| EIC     | Negative | 264.1322 | 2.28 | unknown | 194623     | 66857     | 125559    | 49634     | 54075     | 80457     | 45435     | 109466    | 9731      | 82216     | 52621     | 61473     | 8988      | 77266     | 66257     | 9731      | 19832     | 112757    | 82600    |
| fpHILIC | Positive | 231.0982 | 3.34 | unknown | 1216125    | 932554    | 1003244   | 1121605   | 998295    | 1032319   | 887469    | 1020365   | 877114    | 1198388   | 1017033   | 794673    | 886664    | 830985    | 910644    | 709476    | 893316    | 1070038   | 1074860  |
| fpHILIC | Positive | 290.1347 | 3.34 | unknown | 1456075    | 309511    | 639439    | 1330516   | 623452    | 375605    | 390586    | 567255    | 679720    | 979720    | 510709    | 391683    | 299357    | 270551    | 330720    | 765634    | 655623    | 610611    | 487826   |
| EIC     | Negative | 269.1403 | 1.69 | unknown | 219349     | 437891    | 220692    | 255902    | 275815    | 150283    | 254574    | 158970    | 424295    | 175164    | 204577    | 208345    | 287422    | 270724    | 281336    | 393717    | 182945    | 185100    | 176365   |
| EIC     | Negative | 284.1955 | 3.11 | unknown | 150613     | 83472     | 119839    | 106249    | 96374     | 108218    | 91505     | 136808    | 102748    | 191062    | 104239    | 107695    | 103934    | 94775     | 89274     | 110261    | 98294     | 138213    | 80094    |
| fpHILIC | Negative | 547.1688 | 3.36 | unknown | 8447710    | 8215375   | 9611043   | 10085469  | 7601032   | 7354564   | 7553384   | 9621601   | 7906915   | 9509900   | 8642050   | 8465705   | 7749760   | 7429106   | 7262000   | 7573921   | 7404467   | 8398244   | 7956001  |
| fpHILIC | Positive | 204.1537 | 4.46 | unknown | 1274488    | 7671037   | 765238    | 1205229   | 1112426   | 798602    | 594739    | 993844    | 1118145   | 905445    | 878201    | 1011786   | 590164    | 10216834  | 1010122   | 796857    | 726743    | 801187    | 1085688  |
| EIC     | Negative | 323.1854 | 3.40 | unknown | 1202323    | 503098    | 997838    | 499502    | 527070    | 681785    | 658661    | 681845    | 180428    | 769857    | 515285    | 817276    | 495521    | 328439    | 458864    | 404022    | 461152    | 890871    | 427858   |
| fpHILIC | Positive | 732.5513 | 0.44 | unknown | 1215050    | 1341227   | 1242698   | 1133975   | 981706    | 875534    | 947022    | 1020544   | 932637    | 1183634   | 839854    | 1094690   | 976773    | 1467447   | 1010700   | 783686    | 1136711   | 1090392   | 1018567  |
| EIC     | Negative | 269.0878 | 0.55 | unknown | 12464953   | 2584103   | 3960873   | 7501519   | 2060505   | 8009707   | 3871065   | 1409182   | 2047556   | 7323508   | 3576368   | 3724322   | 2634036   | 2093737   | 2629798   | 3651077   | 1861220   | 2774021   | 5922685  |
| EIC     | Negative | 572.3480 | 4.18 | unknown | 928597     | 826976    | 845122    | 840110    | 768685    | 834263    | 715653    | 851834    | 743794    | 818384    | 684855    | 737897    | 629161    | 602898    | 602898    | 655981    | 703079    | 776427    | 529295   |
| EIC     | Negative | 237.1495 | 4.60 | unknown | 1742922    | 539403    | 2024373   | 3906620   | 707912    | 856982    | 976529    | 1404008   | 576298    | 1610280   | 711620    | 1304523   | 1338371   | 275358    | 492795    | 886609    | 841328    | 1733787   | 439325   |
| EIC     | Negative | 409.2819 | 4.45 | unknown | 577795     | 433697    | 477711    | 528102    | 397695    | 240725    | 587882    | 582021    | 534318    | 533302    | 446603    | 468778    | 543728    | 385862    | 398197    | 551652    | 432536    | 543000    | 343862   |
| fpHILIC | Positive | 522.3547 | 0.58 | unknown | 98566416   | 108538352 | 111105256 | 87689360  | 87601248  | 103948328 | 116650664 | 96483872  | 70867744  | 83344440  | 97383001  | 111294098 | 95047760  | 93238736  | 101401728 | 85234480  | 92866672  | 87395584  | 93812952 |
| EIC     | Negative | 326.2550 | 5.88 | unknown | 245482     | 121281    | 297313    | 985267    | 143055    | 120702    | 144132    | 238432    | 208534    | 625554    | 134841    | 216909    | 189105    | 77834     | 99868     | 205244    | 160391    | 324518    | 86674    |
| fpHILIC | Negative | 254.0157 | 2.39 | unknown | 1110878    | 458791    | 662465    |           |           |           |           |           |           |           |           |           |           |           |           |           |           |           |          |

|        |          |          |      |         |          |          |          |          |          |          |          |          |          |          |          |          |          |          |          |          |          |          |          |
|--------|----------|----------|------|---------|----------|----------|----------|----------|----------|----------|----------|----------|----------|----------|----------|----------|----------|----------|----------|----------|----------|----------|----------|
| EIC    | Negative | 270.0913 | 0.55 | unknown | 1304086  | 270691   | 409062   | 771961   | 210625   | 833226   | 432786   | 142352   | 214413   | 761890   | 362176   | 405229   | 253045   | 204102   | 280077   | 391529   | 211022   | 292199   | 613875   |
| EIC    | Negative | 531.3066 | 4.84 | unknown | 790775   | 869882   | 811337   | 858198   | 775067   | 737051   | 808957   | 852029   | 828021   | 792807   | 803255   | 780535   | 800810   | 797976   | 808749   | 856414   | 758419   | 711661   | 768693   |
| EIC    | Negative | 428.2649 | 4.05 | unknown | 201772   | 172340   | 189602   | 147501   | 197611   | 131325   | 170872   | 210726   | 184661   | 601156   | 170872   | 158310   | 201908   | 151916   | 182163   | 115046   | 187671   | 184184   | 138261   |
| EIC    | Negative | 567.3506 | 4.94 | unknown | 328115   | 405724   | 330385   | 268466   | 333910   | 384802   | 393545   | 273023   | 188450   | 268162   | 387137   | 363909   | 315708   | 304590   | 371615   | 278340   | 300183   | 240795   | 344913   |
| EIC    | Negative | 324.2560 | 4.99 | unknown | 359389   | 329570   | 293666   | 379664   | 326899   | 0        | 310370   | 327405   | 301179   | 328890   | 320895   | 320339   | 287721   | 265673   | 313761   | 0        | 323961   | 327222   | 279364   |
| EIC    | Negative | 488.8975 | 3.47 | unknown | 94325    | 84057    | 69477    | 120973   | 79458    | 701176   | 99735    | 53963    | 74894    | 83958    | 85872    | 79048    | 68648    | 71395    | 62007    | 95969    | 79282    | 76358    | 55641    |
| fpHLIC | Negative | 304.0706 | 3.21 | unknown | 39120944 | 29145194 | 29107830 | 33610020 | 30432572 | 31159962 | 29311688 | 29121542 | 31096252 | 30721932 | 2480476  | 29490462 | 28939432 | 24656926 | 28869756 | 31699112 | 27787806 | 31723584 | 27460000 |
| fpHLIC | Positive | 140.0471 | 2.66 | unknown | 2110597  | 500654   | 353391   | 441425   | 339129   | 926380   | 115646   | 509511   | 1057045  | 282077   | 279338   | 977313   | 531736   | 620590   | 223272   | 719995   | 571153   | 876867   | 487816   |
| EIC    | Negative | 471.0346 | 0.49 | unknown | 1769743  | 1902914  | 2041612  | 2062111  | 1583366  | 1925668  | 1872895  | 1922988  | 2002918  | 1956653  | 1885640  | 1815018  | 1902947  | 184027   | 1797235  | 1807559  | 1835875  | 1754807  | 1732646  |
| EIC    | Negative | 605.3556 | 4.52 | unknown | 2546160  | 2358774  | 2215820  | 2202315  | 2217577  | 2409075  | 2340597  | 2375520  | 2192152  | 2222565  | 2302025  | 2337774  | 2293288  | 2247514  | 2354363  | 2167757  | 2367227  | 2074915  | 2301300  |
| fpHLIC | Positive | 84.0448  | 3.47 | unknown | 8691995  | 5132679  | 6116416  | 5537776  | 5530097  | 5775566  | 4965677  | 5782375  | 5507454  | 5666002  | 5401772  | 5947497  | 4696299  | 4643280  | 6360982  | 5270036  | 5009897  | 5914243  | 4362429  |
| fpHLIC | Positive | 140.0528 | 2.66 | unknown | 21131312 | 3460528  | 2651062  | 2982741  | 2941855  | 8233851  | 885585   | 3870604  | 9214042  | 2405900  | 2094005  | 7399680  | 4404511  | 5058377  | 1926418  | 5674790  | 4994776  | 7997674  | 3966459  |
| EIC    | Negative | 298.2470 | 4.41 | unknown | 2376699  | 1864580  | 2171576  | 2206365  | 2153341  | 1999582  | 1989760  | 2253953  | 1919781  | 2330429  | 1886215  | 1921238  | 2001794  | 1872396  | 2020199  | 1917339  | 2009002  | 2286018  | 1853366  |
| EIC    | Negative | 354.0044 | 1.19 | unknown | 78922    | 83401    | 73686    | 76660    | 69266    | 72005    | 68420    | 72093    | 64174    | 65831    | 67412    | 67077    | 64642    | 59869    | 69439    | 62417    | 66803    | 78268    | 61316    |
| fpHLIC | Positive | 762.5909 | 0.44 | unknown | 1623236  | 1880344  | 1651841  | 1747138  | 1780979  | 1432698  | 1600246  | 1725827  | 2146040  | 1506964  | 2023194  | 1942600  | 1633828  | 2190310  | 1784661  | 1501094  | 1951075  | 1406741  | 1865624  |
| EIC    | Negative | 529.3531 | 2.92 | unknown | 258725   | 211821   | 211821   | 2219030  | 298156   | 531167   | 394216   | 361448   | 598048   | 685838   | 236265   | 478186   | 618400   | 122999   | 104324   | 555958   | 385222   | 600313   | 163873   |
| EIC    | Negative | 365.1977 | 2.53 | unknown | 125611   | 89685    | 146000   | 92201    | 57083    | 88162    | 117946   | 66804    | 89809    | 93048    | 79570    | 125027   | 125000   | 69017    | 55772    | 103923   | 85021    | 82810    | 83049    |
| fpHLIC | Positive | 164.1164 | 2.92 | unknown | 4319605  | 4249476  | 4162037  | 2775118  | 2391258  | 2998863  | 3424267  | 2944918  | 1977717  | 3523487  | 3582388  | 3558120  | 2940783  | 2882563  | 3236200  | 1966419  | 2286770  | 2648244  | 3559587  |
| EIC    | Negative | 336.7163 | 0.62 | unknown | 199806   | 115702   | 179589   | 129076   | 142328   | 119258   | 109187   | 73056    | 132010   | 216727   | 94739    | 71657    | 95312    | 195538   | 86418    | 108747   | 75738    | 109472   | 189240   |
| EIC    | Negative | 261.1507 | 2.83 | unknown | 449182   | 223777   | 613070   | 622850   | 191246   | 303108   | 249329   | 438198   | 175946   | 678828   | 204236   | 232456   | 174747   | 114602   | 257590   | 182456   | 155757   | 494500   | 182125   |
| fpHLIC | Positive | 131.0499 | 3.48 | unknown | 717072   | 461110   | 639572   | 661900   | 411718   | 349132   | 597583   | 611130   | 422717   | 603124   | 554681   | 314813   | 546844   | 447103   | 664860   | 339580   | 569915   | 338338   | 408213   |
| fpHLIC | Positive | 133.2277 | 4.56 | unknown | 559963   | 480901   | 525339   | 661900   | 617998   | 384370   | 800991   | 404107   | 438300   | 545601   | 682704   | 511255   | 515500   | 522698   | 408796   | 537977   | 501229   | 379459   | 536155   |
| fpHLIC | Negative | 147.0185 | 4.03 | unknown | 626982   | 438933   | 551211   | 624720   | 386174   | 421503   | 463288   | 570454   | 337569   | 636248   | 469844   | 361446   | 305322   | 535746   | 575362   | 263294   | 314629   | 592235   | 388346   |
| fpHLIC | Negative | 325.1254 | 3.43 | unknown | 11156044 | 8638204  | 9722128  | 10735243 | 8073156  | 7873679  | 7873679  | 8992657  | 7857256  | 8916621  | 8414931  | 9073790  | 7917995  | 5756748  | 8906402  | 7945318  | 7748302  | 8915602  | 6792405  |
| EIC    | Negative | 355.2130 | 3.32 | unknown | 1144937  | 224926   | 1100170  | 558313   | 278506   | 379469   | 431431   | 782543   | 111069   | 790505   | 198657   | 372048   | 191293   | 198574   | 242525   | 100221   | 221090   | 1110620  | 264422   |
| fpHLIC | Positive | 269.1069 | 1.79 | unknown | 0        | 66379    | 72444    | 687263   | 43795    | 48318    | 112117   | 389349   | 110138   | 75943    | 141758   | 75751    | 1682405  | 414073   | 32113    | 65545    | 466810   | 93859    | 32156    |
| fpHLIC | Positive | 759.5728 | 0.44 | unknown | 48908028 | 56493532 | 54776980 | 42440028 | 41302056 | 39121400 | 34176212 | 39664884 | 56129968 | 38882092 | 57606848 | 42221552 | 40172048 | 63294436 | 42139096 | 38566460 | 36248728 | 34789060 | 54420296 |
| EIC    | Negative | 484.6909 | 0.52 | unknown | 221664   | 64982    | 262344   | 168721   | 285778   | 144219   | 130493   | 0        | 181808   | 299130   | 90994    | 28950    | 188007   | 117903   | 146056   | 84629    | 158455   | 220445   | 106384   |
| EIC    | Negative | 289.1060 | 3.11 | unknown | 263729   | 88288    | 178524   | 320539   | 88303    | 162973   | 125852   | 203508   | 36552    | 216441   | 74431    | 142491   | 127387   | 136313   | 77214    | 86855    | 219393   | 85229    | 107834   |
| EIC    | Negative | 317.2491 | 5.27 | unknown | 287044   | 216429   | 315672   | 267111   | 225442   | 66922    | 191090   | 240951   | 173589   | 3681709  | 196427   | 165949   | 134801   | 106973   | 206937   | 166619   | 162586   | 236654   | 107596   |
| fpHLIC | Negative | 528.2943 | 0.61 | unknown | 834334   | 690635   | 731400   | 738472   | 722677   | 678302   | 689138   | 789204   | 560355   | 705952   | 709136   | 788018   | 588797   | 679243   | 931336   | 709689   | 548649   | 543279   | 639614   |
| fpHLIC | Negative | 820.5682 | 0.44 | unknown | 4450455  | 4432211  | 4218020  | 3057956  | 3834043  | 3072688  | 3455279  | 3414418  | 4836706  | 3468816  | 3798485  | 3527177  | 3685264  | 4586266  | 4300450  | 3353320  | 3608087  | 2921241  | 4076384  |
| EIC    | Negative | 451.2654 | 4.27 | unknown | 868765   | 1207006  | 1084930  | 771775   | 965701   | 1247569  | 940852   | 802640   | 660261   | 615824   | 1010754  | 867740   | 713271   | 1373921  | 848123   | 975086   | 693909   | 914079   | 198384   |
| fpHLIC | Negative | 187.1087 | 2.91 | unknown | 1468776  | 1373621  | 1403085  | 1355828  | 1133263  | 1832202  | 1082842  | 829287   | 1233639  | 1420335  | 1314607  | 1281453  | 1041744  | 775008   | 1164090  | 1427581  | 1154411  | 1337888  | 862588   |
| EIC    | Negative | 253.1446 | 2.27 | unknown | 7101838  | 4441075  | 5966420  | 9261316  | 4623431  | 4015793  | 3573307  | 5449246  | 3886224  | 7542055  | 2652676  | 3236451  | 4036645  | 2655756  | 3129991  | 4992036  | 3642228  | 6841741  | 2554514  |
| fpHLIC | Negative | 763.5598 | 0.48 | unknown | 644502   | 1133564  | 684964   | 691384   | 955096   | 683962   | 757358   | 474505   | 953438   | 578996   | 887119   | 685119   | 619644   | 661766   | 843941   | 824087   | 654363   | 546765   | 887931   |
| EIC    | Negative | 280.1625 | 2.39 | unknown | 211638   | 94034    | 145034   | 111844   | 150531   | 189138   | 51640    | 183957   | 161900   | 129322   | 101357   | 51890    | 93534    | 101357   | 101357   | 51890    | 93534    | 111727   | 89049    |
| EIC    | Negative | 342.7334 | 0.52 | unknown | 249506   | 63893    | 231834   | 125472   | 171794   | 135043   | 124496   | 22169    | 133234   | 71722    | 47138    | 27760    | 74119    | 931890   | 83324    | 106798   | 34201    | 104729   | 292224   |
| EIC    | Negative | 396.1779 | 0.71 | unknown | 139738   | 184717   | 217957   | 95769    | 110402   | 136431   | 161944   | 121919   | 119214   | 183273   | 192252   | 167085   | 121797   | 162652   | 129476   | 114059   | 117212   | 106355   | 171784   |
| EIC    | Negative | 402.6897 | 0.64 | unknown | 125154   | 54212    | 112429   | 86723    | 113852   | 76869    | 76006    | 46477    | 70722    | 201420   | 55353    | 38324    | 63664    | 314795   | 66535    | 54598    | 44727    | 78033    | 133538   |
| EIC    | Negative | 639.4113 | 4.03 | unknown | 0        | 0        | 207175   | 186558   | 0        | 0        | 214979   | 0        | 0        | 0        | 0        | 0        | 0        | 0        | 0        | 0        | 0        | 211505   | 0        |
| EIC    | Negative | 241.1808 | 3.98 | unknown | 604417   | 443488   | 719822   | 1373013  | 599141   | 492858   | 170941   | 787318   | 0        | 668907   | 134135   | 184388   | 646581   | 335431   | 321299   | 0        | 539994   | 809640   | 346280   |
| EIC    | Negative | 342.2655 | 6.06 | unknown | 197295   | 144025   | 240637   | 270176   | 141983   | 135281   | 165533   | 160585   | 231372   | 161562   | 143438   | 168331   | 170648   | 134336   | 128105   | 202755   | 180581   | 204400   | 105018   |
| EIC    | Negative | 546.2505 | 1.12 | unknown | 157479   | 81004    | 269670   | 187773   | 82589    | 51604    | 113037   | 141356   | 61582    | 135070   | 135003   | 113796   | 133411   | 40647    | 75214    | 89825    | 72217    | 169800   | 35919    |
| EIC    | Negative | 516.2967 | 4.18 | unknown | 397455   | 316933   | 341408   | 360515   | 279474   | 345285   | 281323   | 324494   | 251352   | 361758   | 347499   | 282063   | 286278   | 263293   | 240627   | 271336   | 307425   | 330665   | 302467   |
| fpHLIC | Positive | 121.0394 | 2.66 | unknown | 4090791  | 585959   | 442094   | 523469   | 567580   | 1452889  | 167295   | 377743   | 1645216  | 510714   | 403740   | 1360175  | 823226   | 1005642  | 424213   | 1054264  | 930693   | 1411409  | 677478   |
| EIC    | Negative | 438.2487 | 6.00 | unknown | 612375   | 1012401  | 557255   | 1451253  | 573533   | 956260   | 693627   | 749943   | 899475   | 1135572  | 1087317  | 466430   | 878818   | 941996   | 976667   | 463213   | 117070   | 550265   | 739552   |
| fpHLIC | Positive | 391.1017 | 3.37 | unknown | 3387399  | 2852449  | 4964039  | 4521680  | 3873378  | 3146686  | 3354235  | 4036599  | 3185033  | 4986786  | 3849763  | 3354946  | 3553089  | 3056458  | 2942313  | 3090277  | 3661121  | 4604334  | 3387557  |
| EIC    | Negative |          |      |         |          |          |          |          |          |          |          |          |          |          |          |          |          |          |          |          |          |          |          |







|         |          |          |      |         |          |          |          |          |          |          |          |          |          |          |          |          |          |          |          |          |          |          |          |
|---------|----------|----------|------|---------|----------|----------|----------|----------|----------|----------|----------|----------|----------|----------|----------|----------|----------|----------|----------|----------|----------|----------|----------|
| EIC     | Negative | 452.3107 | 2.57 | unknown | 7323037  | 614585   | 5194416  | 1710272  | 774139   | 730387   | 1341688  | 1833731  | 397724   | 139921   | 0        | 0        | 24947    | 0        | 13130    | 0        | 0        | 0        | 0        |
| EIC     | Negative | 473.2881 | 2.84 | unknown | 1501401  | 529307   | 1148540  | 809054   | 446839   | 944235   | 867334   | 980082   | 399614   | 0        | 0        | 0        | 0        | 0        | 0        | 0        | 0        | 0        | 11861    |
| fpHILIC | Positive | 350.1368 | 2.66 | unknown | 1928109  | 350497   | 276624   | 324452   | 325732   | 772579   | 74457    | 468832   | 977478   | 277540   | 187516   | 641610   | 467506   | 0        | 102599   | 577545   | 653517   | 879642   | 392890   |
| EIC     | Negative | 287.1077 | 3.54 | unknown | 231832   | 252920   | 239858   | 245869   | 224069   | 242691   | 248512   | 230210   | 218700   | 241245   | 236653   | 233987   | 249306   | 220063   | 233837   | 223365   | 219554   | 249588   | 232429   |
| EIC     | Negative | 289.1236 | 3.59 | unknown | 458807   | 422400   | 396408   | 430672   | 384558   | 427321   | 419821   | 408507   | 380299   | 396276   | 398400   | 395067   | 408050   | 365960   | 395144   | 417067   | 394376   | 373819   | 430788   |
| fpHILIC | Negative | 157.0869 | 0.40 | unknown | 2177473  | 1576344  | 2945793  | 2159084  | 1519634  | 2400816  | 1945650  | 1671270  | 2139405  | 2747442  | 1430857  | 2171726  | 2537194  | 1509349  | 1557743  | 2242818  | 1721933  | 2836118  | 1274372  |
| EIC     | Negative | 254.1761 | 3.37 | unknown | 1445566  | 473680   | 757957   | 2372758  | 296273   | 953643   | 407926   | 650868   | 682328   | 1050864  | 630352   | 950218   | 677889   | 226471   | 398951   | 825193   | 511036   | 904845   | 337563   |
| fpHILIC | Negative | 245.0430 | 3.06 | unknown | 1395337  | 804292   | 660967   | 959999   | 898925   | 1065991  | 1104515  | 822159   | 661136   | 844086   | 840196   | 1138825  | 642539   | 682571   | 994547   | 961252   | 792428   | 984796   | 799759   |
| EIC     | Negative | 466.1816 | 0.70 | unknown | 116913   | 111947   | 144862   | 65375    | 92542    | 109015   | 123764   | 82260    | 96100    | 128926   | 114411   | 109940   | 91333    | 134647   | 92794    | 90176    | 95187    | 66559    | 156833   |
| EIC     | Negative | 320.2674 | 5.88 | unknown | 205221   | 121435   | 211985   | 200245   | 127614   | 74269    | 110950   | 187089   | 109939   | 256196   | 135634   | 102079   | 109938   | 100644   | 129193   | 98089    | 112094   | 176501   | 91476    |
| fpHILIC | Positive | 772.5830 | 0.43 | unknown | 1481241  | 1501744  | 1494854  | 1274140  | 1159636  | 1483145  | 1082996  | 1623623  | 1119049  | 1156555  | 1297547  | 1085264  | 1081700  | 1707108  | 1269876  | 1069803  | 1218248  | 1355940  | 1528395  |
| EIC     | Negative | 270.1713 | 2.44 | unknown | 8343937  | 4073950  | 6041642  | 6422950  | 5259518  | 5567375  | 4956798  | 6042432  | 5899286  | 7440735  | 6381234  | 5767152  | 5061348  | 5081903  | 5429269  | 4957915  | 5856595  | 7190057  | 4179802  |
| EIC     | Negative | 328.2820 | 4.97 | unknown | 1746609  | 1790522  | 1648696  | 1811969  | 1769195  | 1610245  | 1663982  | 1741205  | 1609629  | 1648811  | 1663665  | 1660789  | 1617385  | 1581631  | 1654655  | 1705488  | 1708799  | 1733888  | 1559073  |
| fpHILIC | Negative | 868.5672 | 0.43 | unknown | 4692850  | 4567322  | 3240507  | 3678244  | 4195975  | 4556507  | 4252354  | 3712111  | 3099361  | 3201777  | 3732274  | 4381594  | 4359137  | 3796184  | 4194804  | 3960751  | 4615525  | 3248379  | 3722242  |
| EIC     | Negative | 634.0388 | 0.48 | unknown | 5303502  | 5682192  | 6324528  | 6241299  | 4518598  | 5207927  | 5512413  | 5641357  | 5874999  | 5671606  | 5539480  | 5382598  | 5852927  | 1313956  | 4918113  | 5707710  | 5502145  | 5497021  | 5033236  |
| fpHILIC | Negative | 386.2373 | 0.36 | unknown | 818203   | 582274   | 1048942  | 1740613  | 500439   | 695426   | 483579   | 689969   | 692267   | 715639   | 514188   | 657330   | 554785   | 312441   | 446866   | 604048   | 566353   | 1090267  | 343211   |
| EIC     | Negative | 312.2542 | 6.29 | unknown | 696897   | 375083   | 844610   | 2185234  | 526931   | 419027   | 513254   | 659903   | 756659   | 592218   | 433559   | 635762   | 700370   | 315646   | 331628   | 855393   | 574556   | 776366   | 328450   |
| fpHILIC | Negative | 581.3289 | 0.59 | unknown | 18144482 | 20222258 | 20950244 | 15457464 | 14702417 | 20562982 | 17475858 | 16837634 | 14503083 | 15450852 | 19423570 | 19630196 | 16665942 | 21438138 | 15513204 | 14834660 | 16116686 | 15253073 | 22098720 |
| EIC     | Negative | 295.1194 | 2.22 | unknown | 152255   | 96732    | 165635   | 199827   | 85345    | 78534    | 95423    | 98800    | 81455    | 201934   | 100758   | 108775   | 85086    | 55885    | 108144   | 81231    | 59652    | 120279   | 68876    |
| EIC     | Negative | 557.3569 | 4.84 | unknown | 1311654  | 1603385  | 1382475  | 1266273  | 1347625  | 1257292  | 1432368  | 1291819  | 1479848  | 1196370  | 1358135  | 1492646  | 1410446  | 1420673  | 1436838  | 1390575  | 1388334  | 1107260  | 1465575  |
| EIC     | Negative | 339.0966 | 0.85 | unknown | 112313   | 102798   | 159667   | 150407   | 94224    | 67858    | 118685   | 127224   | 63996    | 138836   | 100242   | 124867   | 108802   | 45927    | 73238    | 88960    | 87816    | 172483   | 48114    |
| EIC     | Negative | 295.1919 | 3.52 | unknown | 1301278  | 393871   | 985338   | 544825   | 534975   | 619055   | 716437   | 888954   | 217396   | 683837   | 353166   | 636446   | 387736   | 380156   | 509914   | 328949   | 422459   | 1358180  | 348893   |
| fpHILIC | Positive | 513.3373 | 0.61 | unknown | 1215698  | 651182   | 1177969  | 649705   | 610787   | 801237   | 734221   | 913318   | 603316   | 965432   | 642176   | 716159   | 322580   | 715138   | 817044   | 952009   | 742574   | 826378   | 314719   |
| fpHILIC | Negative | 266.1513 | 0.35 | unknown | 994435   | 1580098  | 4212425  | 3656420  | 4233657  | 2077413  | 1598028  | 1420947  | 1073395  | 2549510  | 2199083  | 1797418  | 2271352  | 1338707  | 1696131  | 2766095  | 3205155  | 1161454  | 1553690  |
| fpHILIC | Negative | 309.2800 | 0.37 | unknown | 7106327  | 10670731 | 16012353 | 15284279 | 11529938 | 9185068  | 11277193 | 10033638 | 9095214  | 8774260  | 7210107  | 14142572 | 10404389 | 6011099  | 7582101  | 11684591 | 8490179  | 15055205 | 8209276  |
| fpHILIC | Positive | 280.1034 | 2.97 | unknown | 527652   | 349912   | 538349   | 327271   | 289556   | 318162   | 405111   | 263534   | 256740   | 409656   | 480663   | 221938   | 391657   | 199686   | 551580   | 55224    | 428540   | 169728   | 326351   |
| EIC     | Negative | 570.3418 | 2.42 | unknown | 5232662  | 3846191  | 4067529  | 4656260  | 3198353  | 4033240  | 3395653  | 4269972  | 3161356  | 4234625  | 3959994  | 4005705  | 3355531  | 2955193  | 3335305  | 3308693  | 3308772  | 4484962  | 3601258  |
| EIC     | Negative | 382.8119 | 0.65 | unknown | 167165   | 70370    | 83598    | 163977   | 46368    | 114982   | 65759    | 47088    | 50237    | 94112    | 76992    | 74320    | 62347    | 18361    | 55345    | 83409    | 40395    | 63967    | 81213    |
| EIC     | Negative | 338.7139 | 0.62 | unknown | 180592   | 101587   | 168817   | 122343   | 127660   | 108454   | 99896    | 67576    | 117756   | 210679   | 84738    | 73705    | 87440    | 179665   | 79673    | 100288   | 70315    | 96326    | 174581   |
| fpHILIC | Negative | 146.0177 | 4.03 | unknown | 3344886  | 2393991  | 2915533  | 3462054  | 2239399  | 2179034  | 2288745  | 3456676  | 1855313  | 3281470  | 2419137  | 1779296  | 1598735  | 3007892  | 3265079  | 1560865  | 1855355  | 3277502  | 2059926  |



|        |        |        |        |        |        |        |        |        |        |        |        |        |        |        |        |        |        |        |        |        |        |        |        |        |        |        |        |        |        |        |        |        |        |        |        |        |        |        |        |        |        |        |        |        |        |        |        |        |        |        |        |        |        |        |        |        |        |        |        |        |        |        |        |        |        |        |        |        |        |        |        |        |        |        |        |        |        |        |        |        |        |        |        |        |        |        |        |        |        |        |        |        |        |        |        |        |        |        |        |        |
|--------|--------|--------|--------|--------|--------|--------|--------|--------|--------|--------|--------|--------|--------|--------|--------|--------|--------|--------|--------|--------|--------|--------|--------|--------|--------|--------|--------|--------|--------|--------|--------|--------|--------|--------|--------|--------|--------|--------|--------|--------|--------|--------|--------|--------|--------|--------|--------|--------|--------|--------|--------|--------|--------|--------|--------|--------|--------|--------|--------|--------|--------|--------|--------|--------|--------|--------|--------|--------|--------|--------|--------|--------|--------|--------|--------|--------|--------|--------|--------|--------|--------|--------|--------|--------|--------|--------|--------|--------|--------|--------|--------|--------|--------|--------|--------|--------|--------|--------|--------|--------|
| 180000 | 180001 | 180002 | 180003 | 180004 | 180005 | 180006 | 180007 | 180008 | 180009 | 180010 | 180011 | 180012 | 180013 | 180014 | 180015 | 180016 | 180017 | 180018 | 180019 | 180020 | 180021 | 180022 | 180023 | 180024 | 180025 | 180026 | 180027 | 180028 | 180029 | 180030 | 180031 | 180032 | 180033 | 180034 | 180035 | 180036 | 180037 | 180038 | 180039 | 180040 | 180041 | 180042 | 180043 | 180044 | 180045 | 180046 | 180047 | 180048 | 180049 | 180050 | 180051 | 180052 | 180053 | 180054 | 180055 | 180056 | 180057 | 180058 | 180059 | 180060 | 180061 | 180062 | 180063 | 180064 | 180065 | 180066 | 180067 | 180068 | 180069 | 180070 | 180071 | 180072 | 180073 | 180074 | 180075 | 180076 | 180077 | 180078 | 180079 | 180080 | 180081 | 180082 | 180083 | 180084 | 180085 | 180086 | 180087 | 180088 | 180089 | 180090 | 180091 | 180092 | 180093 | 180094 | 180095 | 180096 | 180097 | 180098 | 180099 | 180100 |
|--------|--------|--------|--------|--------|--------|--------|--------|--------|--------|--------|--------|--------|--------|--------|--------|--------|--------|--------|--------|--------|--------|--------|--------|--------|--------|--------|--------|--------|--------|--------|--------|--------|--------|--------|--------|--------|--------|--------|--------|--------|--------|--------|--------|--------|--------|--------|--------|--------|--------|--------|--------|--------|--------|--------|--------|--------|--------|--------|--------|--------|--------|--------|--------|--------|--------|--------|--------|--------|--------|--------|--------|--------|--------|--------|--------|--------|--------|--------|--------|--------|--------|--------|--------|--------|--------|--------|--------|--------|--------|--------|--------|--------|--------|--------|--------|--------|--------|--------|--------|--------|

















|         |            |             |             |            |             |            |             |            |             |             |             |            |            |            |             |            |             |            |           |            |            |            |            |            |            |            |           |
|---------|------------|-------------|-------------|------------|-------------|------------|-------------|------------|-------------|-------------|-------------|------------|------------|------------|-------------|------------|-------------|------------|-----------|------------|------------|------------|------------|------------|------------|------------|-----------|
| unknown | 482.153    | 1.659125202 | 0.52864421  | 0.00807672 | 0.11108499  | 1.26493167 | 0.93905479  | 1.38815325 | 0.47482242  | -0.48913089 | -0.73087376 | 0.00234534 | 0.05699795 | 0.00700224 | -0.72380061 | 0.00233858 | -0.62099809 | 1.0391815  | -0.18381  | 0.13337715 | 0.0094572  | 0.76969173 | -0.7802810 | 0.93466481 | -0.120818  | -17.594708 |           |
| unknown | 482.308    | 1.62765457  | 0.47790031  | 0.02084683 | 0.2431211   | 1.27088477 | 1.13893451  | 0.4200311  | 0.2149475   | -0.2149475  | 0.7912036   | 0.0028678  | 0.0028678  | 0.0706271  | 0.7628768   | 0.7628768  | 0.0113918   | -0.6111818 | 1.101891  | -0.048679  | 0.0702744  | 0.0662029  | 0.7197742  | -0.498791  | 0.870222   | -0.101368  |           |
| unknown | 255.262    | 1.08574077  | -0.59314761 | 0.07707876 | -0.78802037 | 0.57862717 | -0.78802037 | 0.64472827 | -0.83876727 | 0.42825237  | -0.1762179  | 0.00280809 | 0.0706271  | 1.0298122  | 0.1613986   | 1.063577   | 0.7520623   | -0.1013918 | 1.0857408 | 0.0028081  | 0.0028081  | 0.0028081  | 0.0028081  | 0.0028081  | 0.0028081  | 0.0028081  | -13.30761 |
| unknown | 188.736    | 1.2097787   | 0.77482226  | 0.02208794 | 0.10133196  | 0.82622266 | 0.5466622   | 0.42748662 | 0.27088021  | 0.42748662  | 0.27088021  | 0.0132016  | 0.0132016  | 0.0132016  | 0.0132016   | 0.0132016  | 0.0132016   | 0.0132016  | 1.2097788 | 0.0132016  | 0.0132016  | 0.0132016  | 0.0132016  | 0.0132016  | 0.0132016  | -0.738187  |           |
| unknown | 175.148882 | 0.49217976  | 0.00881134  | 0.02374149 | 1.2012805   | 0.30804079 | 0.30804079  | 0.51073769 | 0.10738108  | -0.0737381  | 0.00281225  | 0.00281225 | 0.00281225 | 0.00281225 | 0.00281225  | 0.00281225 | 0.00281225  | 0.00281225 | 1.7514889 | 0.00281225 | 0.00281225 | 0.00281225 | 0.00281225 | 0.00281225 | 0.00281225 | -0.170737  |           |
| unknown | 227.8646   | 1.13023236  | 0.01696664  | 0.0164248  | -0.82090064 | 0.63207974 | 0.63207974  | 0.50766281 | 0.00880064  | 0.00880064  | 0.00880064  | 0.00880064 | 0.00880064 | 0.00880064 | 0.00880064  | 0.00880064 | 0.00880064  | 0.00880064 | 1.2278647 | 0.00880064 | 0.00880064 | 0.00880064 | 0.00880064 | 0.00880064 | 0.00880064 | -0.809208  |           |
| unknown | 140.074    | 1.11771715  | 0.73025282  | 0.00980085 | 0.00722166  | 1.0030976  | 0.96027768  | 0.5641076  | 0.00736166  | -0.87593628 | 0.00280809  | 0.00280809 | 0.00280809 | 0.00280809 | 0.00280809  | 0.00280809 | 0.00280809  | 0.00280809 | 1.4007401 | 0.00280809 | 0.00280809 | 0.00280809 | 0.00280809 | 0.00280809 | 0.00280809 | -0.827896  |           |
| unknown | 102.611    | 0.62444138  | 0.00243092  | 0.00560055 | 0.00243092  | 0.17164799 | 0.17164799  | 0.17164799 | 0.17164799  | 0.17164799  | 0.17164799  | 0.17164799 | 0.17164799 | 0.17164799 | 0.17164799  | 0.17164799 | 0.17164799  | 0.17164799 | 1.0261101 | 0.00243092 | 0.00243092 | 0.00243092 | 0.00243092 | 0.00243092 | 0.00243092 | -0.774764  |           |
| unknown | 139.424    | 1.39841422  | 0.55242887  | 0.00480022 | 0.00480022  | 0.51410727 | 0.48779728  | 0.61308817 | 0.00280809  | 0.00280809  | 0.00280809  | 0.00280809 | 0.00280809 | 0.00280809 | 0.00280809  | 0.00280809 | 0.00280809  | 0.00280809 | 1.3942401 | 0.00480022 | 0.00480022 | 0.00480022 | 0.00480022 | 0.00480022 | 0.00480022 | -0.500348  |           |
| unknown | 349.2      | 1.26028449  | 0.00280809  | 0.00280809 | 0.00280809  | 0.00280809 | 0.00280809  | 0.00280809 | 0.00280809  | 0.00280809  | 0.00280809  | 0.00280809 | 0.00280809 | 0.00280809 | 0.00280809  | 0.00280809 | 0.00280809  | 0.00280809 | 1.3492000 | 0.00280809 | 0.00280809 | 0.00280809 | 0.00280809 | 0.00280809 | 0.00280809 | -0.878798  |           |
| unknown | 271.23     | 1.34641402  | 0.00808072  | 0.00148827 | 0.00808072  | 0.00808072 | 0.00808072  | 0.00808072 | 0.00808072  | 0.00808072  | 0.00808072  | 0.00808072 | 0.00808072 | 0.00808072 | 0.00808072  | 0.00808072 | 0.00808072  | 0.00808072 | 1.2712300 | 0.00148827 | 0.00148827 | 0.00148827 | 0.00148827 | 0.00148827 | 0.00148827 | -0.284209  |           |
| unknown | 226.338    | 1.20897767  | 0.79038771  | 0.00280809 | 0.00280809  | 0.00280809 | 0.00280809  | 0.00280809 | 0.00280809  | 0.00280809  | 0.00280809  | 0.00280809 | 0.00280809 | 0.00280809 | 0.00280809  | 0.00280809 | 0.00280809  | 0.00280809 | 1.2263380 | 0.00280809 | 0.00280809 | 0.00280809 | 0.00280809 | 0.00280809 | 0.00280809 | -0.960604  |           |
| unknown | 421.025    | 1.01114107  | 0.00280809  | 0.00280809 | 0.00280809  | 0.00280809 | 0.00280809  | 0.00280809 | 0.00280809  | 0.00280809  | 0.00280809  | 0.00280809 | 0.00280809 | 0.00280809 | 0.00280809  | 0.00280809 | 0.00280809  | 0.00280809 | 1.0111411 | 0.00280809 | 0.00280809 | 0.00280809 | 0.00280809 | 0.00280809 | 0.00280809 | -0.785428  |           |
| unknown | 408.066    | 1.15884551  | 0.46432125  | 0.01088121 | 0.01088121  | 1.2000361  | 1.2000361   | 0.46432125 | 0.01088121  | 0.01088121  | 0.01088121  | 0.01088121 | 0.01088121 | 0.01088121 | 0.01088121  | 0.01088121 | 0.01088121  | 0.01088121 | 1.1588456 | 0.01088121 | 0.01088121 | 0.01088121 | 0.01088121 | 0.01088121 | 0.01088121 | -0.488414  |           |
| unknown | 437.317    | 1.16028708  | 0.64830026  | 0.01088121 | 0.01088121  | 1.2144776  | 1.2144776   | 0.64830026 | 0.01088121  | 0.01088121  | 0.01088121  | 0.01088121 | 0.01088121 | 0.01088121 | 0.01088121  | 0.01088121 | 0.01088121  | 0.01088121 | 1.1602871 | 0.01088121 | 0.01088121 | 0.01088121 | 0.01088121 | 0.01088121 | 0.01088121 | -0.538468  |           |
| unknown | 409.003    | 1.2603777   | 0.00280809  | 0.00280809 | 0.00280809  | 0.00280809 | 0.00280809  | 0.00280809 | 0.00280809  | 0.00280809  | 0.00280809  | 0.00280809 | 0.00280809 | 0.00280809 | 0.00280809  | 0.00280809 | 0.00280809  | 0.00280809 | 1.2603778 | 0.00280809 | 0.00280809 | 0.00280809 | 0.00280809 | 0.00280809 | 0.00280809 | -0.900203  |           |
| unknown | 483.802    | 1.00488728  | 0.00280809  | 0.00280809 | 0.00280809  | 0.00280809 | 0.00280809  | 0.00280809 | 0.00280809  | 0.00280809  | 0.00280809  | 0.00280809 | 0.00280809 | 0.00280809 | 0.00280809  | 0.00280809 | 0.00280809  | 0.00280809 | 1.0048873 | 0.00280809 | 0.00280809 | 0.00280809 | 0.00280809 | 0.00280809 | 0.00280809 | -0.790355  |           |
| unknown | 138.481    | 1.00488728  | 0.00280809  | 0.00280809 | 0.00280809  | 0.00280809 | 0.00280809  | 0.00280809 | 0.00280809  | 0.00280809  | 0.00280809  | 0.00280809 | 0.00280809 | 0.00280809 | 0.00280809  | 0.00280809 | 0.00280809  | 0.00280809 | 1.3848101 | 0.00280809 | 0.00280809 | 0.00280809 | 0.00280809 | 0.00280809 | 0.00280809 | -0.178193  |           |
| unknown | 137.474    | 1.39841422  | 0.81574828  | 0.00903701 | 0.00903701  | 0.00903701 | 0.00903701  | 0.81574828 | 0.00903701  | 0.00903701  | 0.00903701  | 0.00903701 | 0.00903701 | 0.00903701 | 0.00903701  | 0.00903701 | 0.00903701  | 0.00903701 | 1.3747401 | 0.00903701 | 0.00903701 | 0.00903701 | 0.00903701 | 0.00903701 | 0.00903701 | -0.205741  |           |
| unknown | 807.361    | 1.45440517  | 0.00480022  | 0.00480022 | 0.00480022  | 0.00480022 | 0.00480022  | 0.00480022 | 0.00480022  | 0.00480022  | 0.00480022  | 0.00480022 | 0.00480022 | 0.00480022 | 0.00480022  | 0.00480022 | 0.00480022  | 0.00480022 | 1.4544052 | 0.00480022 | 0.00480022 | 0.00480022 | 0.00480022 | 0.00480022 | 0.00480022 | -0.778617  |           |
| unknown | 157.076    | 1.30884293  | 0.00280809  | 0.00280809 | 0.00280809  | 0.00280809 | 0.00280809  | 0.00280809 | 0.00280809  | 0.00280809  | 0.00280809  | 0.00280809 | 0.00280809 | 0.00280809 | 0.00280809  | 0.00280809 | 0.00280809  | 0.00280809 | 1.5707601 | 0.00280809 | 0.00280809 | 0.00280809 | 0.00280809 | 0.00280809 | 0.00280809 | -0.330357  |           |
| unknown | 303.131    | 1.23069784  | 0.62531614  | 0.00280809 | 0.00280809  | 0.00280809 | 0.00280809  | 0.62531614 | 0.00280809  | 0.00280809  | 0.00280809  | 0.00280809 | 0.00280809 | 0.00280809 | 0.00280809  | 0.00280809 | 0.00280809  | 0.00280809 | 1.2306979 | 0.00280809 | 0.00280809 | 0.00280809 | 0.00280809 | 0.00280809 | 0.00280809 | -0.431888  |           |
| unknown | 136.076    | 1.50879277  | 0.44023226  | 0.00903701 | 0.00903701  | 0.00903701 | 0.00903701  | 0.44023226 | 0.00903701  | 0.00903701  | 0.00903701  | 0.00903701 | 0.00903701 | 0.00903701 | 0.00903701  | 0.00903701 | 0.00903701  | 0.00903701 | 1.3607601 | 0.00903701 | 0.00903701 | 0.00903701 | 0.00903701 | 0.00903701 | 0.00903701 | -0.760169  |           |
| unknown | 479.208    | 1.2793851   | 0.45423028  | 0.00280809 | 0.00280809  | 0.00280809 | 0.00280809  | 0.45423028 | 0.00280809  | 0.00280809  | 0.00280809  | 0.00280809 | 0.00280809 | 0.00280809 | 0.00280809  | 0.00280809 | 0.00280809  | 0.00280809 | 1.2793852 | 0.00280809 | 0.00280809 | 0.00280809 | 0.00280809 | 0.00280809 | 0.00280809 | -0.437146  |           |
| unknown | 155.075    | 1.31266791  | 0.45423028  | 0.00280809 | 0.00280809  | 0.00280809 | 0.00280809  | 0.45423028 | 0.00280809  | 0.00280809  | 0.00280809  | 0.00280809 | 0.00280809 | 0.00280809 | 0.00280809  | 0.00280809 | 0.00280809  | 0.00280809 | 1.5507501 | 0.00280809 | 0.00280809 | 0.00280809 | 0.00280809 | 0.00280809 | 0.00280809 | -0.388278  |           |
| unknown | 338.275    | 1.2793851   | 0.60313056  | 0.00280809 | 0.00280809  | 0.00280809 | 0.00280809  | 0.60313056 | 0.00280809  | 0.00280809  | 0.00280809  | 0.00280809 | 0.00280809 | 0.00280809 | 0.00280809  | 0.00280809 | 0.00280809  | 0.00280809 | 1.3382750 | 0.00280809 | 0.00280809 | 0.00280809 | 0.00280809 | 0.00280809 | 0.00280809 | -0.210222  |           |
| unknown | 445.111    | 1.440514    | 0.57670788  | 0.00280809 | 0.00280809  | 0.00280809 | 0.00280809  | 0.57670788 | 0.00280809  | 0.00280809  | 0.00280809  | 0.00280809 | 0.00280809 | 0.00280809 | 0.00280809  | 0.00280809 | 0.00280809  | 0.00280809 | 1.4405141 | 0.00280809 | 0.00280809 | 0.00280809 | 0.00280809 | 0.00280809 | 0.00280809 | -0.282029  |           |
| unknown | 308.475    | 1.30483807  | 0.52713204  | 0.00280809 | 0.00280809  | 0.00280809 | 0.00280809  | 0.52713204 | 0.00280809  | 0.00280809  | 0.00280809  | 0.00280809 | 0.00280809 | 0.00280809 | 0.00280809  | 0.00280809 | 0.00280809  | 0.00280809 | 1.3048381 | 0.00280809 | 0.00280809 | 0.00280809 | 0.00280809 | 0.00280809 | 0.00280809 | -0.282029  |           |
| unknown | 481.311    | 1.42621878  | 0.44230888  | 0.00280809 | 0.00280809  | 0.00280809 | 0.00280809  | 0.44230888 | 0.00280809  | 0.00280809  | 0.00280809  | 0.00280809 | 0.00280809 | 0.00280809 | 0.00280809  | 0.00280809 | 0.00280809  | 0.00280809 | 1.4262189 | 0.00280809 | 0.00280809 | 0.00280809 | 0.00280809 | 0.00280809 | 0.00280809 | -0.182039  |           |
| unknown | 486.696    | 1.30718166  | 0.40236024  | 0.00280809 | 0.00280809  | 0.00280809 | 0.00280809  | 0.40236024 | 0.00280809  | 0.00280809  | 0.00280809  | 0.00280809 | 0.00280809 | 0.00280809 | 0.00280809  | 0.00280809 | 0.00280809  | 0.00280809 | 1.3071817 | 0.00280809 | 0.00280809 | 0.00280809 | 0.00280809 | 0.00280809 | 0.00280809 | -0.762376  |           |
| unknown | 119.166    | 1.53297782  | 0.64962022  | 0.00280809 | 0.00280809  | 0.00280809 | 0.00280809  | 0.64962022 | 0.00280809  | 0.00280809  | 0.00280809  | 0.00280809 | 0.00280809 | 0.00280809 | 0.00280809  | 0.00280809 | 0.00280809  | 0.00280809 | 1.1916601 | 0.00280809 | 0.00280809 | 0.00280809 | 0.00280809 | 0.00280809 | 0.00280809 | -0.197878  |           |
| unknown | 255.262    | 1.30718166  | 0.40236024  | 0.00280809 | 0.00280809  | 0.00280809 | 0.00280809  | 0.40236024 | 0.00280809  | 0.00280809  |             |            |            |            |             |            |             |            |           |            |            |            |            |            |            |            |           |

# Supplemental table 4

| DLZ vs CON                     |          |               |              |             |              |                         |                               |                                |                                     |
|--------------------------------|----------|---------------|--------------|-------------|--------------|-------------------------|-------------------------------|--------------------------------|-------------------------------------|
| ID                             | m/z      | statistic_OvC | dm_OvC       | pvalue_OvC  | adj_pval_OvC | fold_change_imputed_OvC | log2_fold_change_imput_ed_OvC | fold_change_imputed_scaled_OvC | log2_fold_change_imputed_scaled_OvC |
| 116-TXB2 [M-H]                 | 367.2122 | -5.35067446   | -0.8803872   | 0.0010815   | 0.02720363   | 0.475700298             | -1.071876155                  | 0.528203565                    | -0.520850563                        |
| 15(5) HEPE [M-H]               | 317.2124 | -5.21607731   | -1.038881753 | 0.001230507 | 0.038328362  | 0.441117278             | -1.180765826                  | 0.486823068                    | -1.088530563                        |
| 15(5) HEPE [M-H+Acetate]       | 377.2322 | -6.325572287  | -0.962707732 | 0.000394353 | 0.025604563  | 0.457935038             | -1.126785139                  | 0.506468887                    | -0.981451743                        |
| 15B-PG2 [M-H]                  | 351.2128 | -6.228623102  | -1.41516662  | 0.000435056 | 0.026402395  | 0.321548752             | -1.626898063                  | 0.358466085                    | -1.4800381411                       |
| 17(18) EpETE [M-H]             | 317.2124 | -3.641146032  | -1.575115524 | 0.008274505 | 0.112753035  | 0.275824207             | -1.858179016                  | 0.31092087                     | -1.685380636                        |
| 20cooh AA [M-H]                | 333.2075 | -3.479398588  | -0.924878494 | 0.010275834 | 0.1291112    | 0.465005437             | -1.151828373                  | 0.504038047                    | -0.988801118                        |
| 8-iso-PGA1 [M-H]               | 335.2232 | -8.120514417  | -2.403329614 | 8.24E-05    | 0.017507073  | 0.161519702             | -2.629523207                  | 0.181300852                    | -2.463542383                        |
| 8-iso-PGA2 [M-H+Acetate]       | 395.2441 | -9.683481292  | -2.375632867 | 2.64E-05    | 0.016446553  | 0.163497599             | -2.612849334                  | 0.182596019                    | -2.453277284                        |
| 8-iso-PGA2 [M-H+Acetate]       | 393.2288 | -8.563889321  | -2.079593988 | 5.89E-05    | 0.016446553  | 0.188501762             | -2.332776284                  | 0.222422877                    | -2.168622915                        |
| 8(9)-EpETE [M-H]               | 317.2124 | -4.340096024  | -1.529660053 | 0.003797778 | 0.073706376  | 0.290120013             | -1.785278274                  | 0.326021287                    | -1.616963928                        |
| ASPARAGINE                     | 133.0605 | -2.977728398  | -0.582348143 | 0.02581009  | 0.184860554  | 0.577697195             | -0.791614606                  | 0.633500653                    | -0.658581989                        |
| CITRULLINE                     | 176.1026 | 4.661421136   | 0.429688822  | 0.002310647 | 0.054200457  | 1.194316521             | 0.256185234                   | 1.318489724                    | 0.398886327                         |
| Docosatrienoic Acid [M-H]      | 335.2958 | 2.60909045    | 0.679911369  | 0.03490662  | 0.245666463  | 1.318881333             | 0.399347963                   | 1.461344667                    | 0.449271579                         |
| Palmitoleic Acid [M-H+Acetate] | 313.2386 | 3.572389654   | 0.933298617  | 0.00967905  | 0.119217362  | 1.673192926             | 0.743601804                   | 1.843624897                    | 0.882511013                         |
| PGA3 [M-H]                     | 331.1919 | -6.208265981  | -1.30577215  | 0.000441685 | 0.026405285  | 0.357391034             | -1.484786769                  | 0.398285901                    | -1.328110643                        |
| PGA3 [M-H+Acetate]             | 391.2135 | -6.40255056   | -1.153895919 | 0.00036639  | 0.024987604  | 0.399959106             | -1.320205998                  | 0.444468223                    | -1.169849718                        |
| SERINE                         | 104.0354 | -4.77928356   | -0.748540613 | 0.00013948  | 0.049746038  | 0.515449756             | -0.95696389                   | 0.569274762                    | -0.812802653                        |
| SERINE[M+2Q+H]                 | 88.0398  | -2.464654888  | -0.386963421 | 0.043169789 | 0.086166     | 0.675979325             | -0.564948972                  | 0.739769966                    | -0.44851365                         |
| Tyrosine Acid [M-H+Acetate]    | 411.3483 | 5.225814203   | 0.872408464  | 0.00121802  | 0.038228202  | 1.604698802             | 0.682302532                   | 1.752592271                    | 0.809490401                         |

| M0v0        |            |            |            |                |             |             |             |             |             |
|-------------|------------|------------|------------|----------------|-------------|-------------|-------------|-------------|-------------|
| statistic_M | dm_M0v0    | pvalue_M0  | adj_pval_M | imputed_scaled | log2_fold_c | fold_change | log2_fold_c | fold_change | log2_fold_c |
| 3.64746686  | 0.62395912 | 0.0056264  | 0.08668786 | 1.53596721     | 0.61914742  | 1.65198367  | 0.72419855  |             |             |
| 3.68435184  | 0.81122724 | 0.00618028 | 0.09461138 | 1.71881026     | 0.7814103   | 1.84565211  | 0.88413065  |             |             |
| 3.78912142  | 0.17774139 | 0.00531849 | 0.08785991 | 1.63192413     | 0.70657398  | 1.75075869  | 0.80798025  |             |             |
| 5.07671887  | 0.0345191  | 0.0098104  | 0.04774127 | 2.07068482     | 1.00101998  | 2.21871717  | 1.15089164  |             |             |
| 2.92534178  | 1.04452952 | 0.01913411 | 0.17270636 | 2.06726045     | 1.04772016  | 2.2254246   | 1.15408062  |             |             |
| 2.49272226  | 0.62193951 | 0.03786338 | 0.23944854 | 1.55080849     | 0.63302054  | 1.67051506  | 0.74029299  |             |             |
| 4.19178385  | 1.65231758 | 0.00303036 | 0.07179053 | 2.81913366     | 1.49525137  | 3.0591004   | 1.61107044  |             |             |
| 3.30189181  | 1.36323015 | 0.02108217 | 0.12714389 | 2.84475863     | 1.50830625  | 3.10959562  | 1.63672086  |             |             |
| 2.74426602  | 1.24775295 | 0.02528197 | 0.1381335  | 2.79309756     | 1.48186397  | 3.04239575  | 1.60220783  |             |             |
| 2.34902091  | 0.74029043 | 0.05465227 | 0.20807339 | 1.70282841     | 0.78793932  | 1.83302396  | 0.87227272  |             |             |
| 3.79354822  | 0.72526204 | 0.00528503 | 0.08785991 | 1.68621896     | 0.75379189  | 1.80775077  | 0.85419579  |             |             |
| -2.7705654  | -0.3905228 | 0.02427549 | 0.194609   | 0.76075424     | -0.3944876  | 0.81608004  | -0.2932174  |             |             |
| -1.7899974  | -0.4806696 | 0.0531185  | 0.08786091 | 0.7194382      | -0.4700415  | 0.77322821  | -0.3710252  |             |             |
| -2.6884624  | -0.5242182 | 0.02754221 | 0.20470748 | 0.67565863     | -0.6566136  | 0.72893768  | -0.4611301  |             |             |
| 5.31275675  | 0.9718403  | 0.00080527 | 0.04269255 | 1.90497028     | 0.92978849  | 2.0439526   | 1.03136174  |             |             |
| 5.40014152  | 0.9226252  | 0.00060591 | 0.04061469 | 1.85139033     | 0.8886091   | 1.98012884  | 0.98595978  |             |             |
| 3.42654604  | 0.88915419 | 0.00900304 | 0.11470966 | 1.66565085     | 0.75167059  | 1.76926724  | 0.82315138  |             |             |
| 2.49484415  | 0.51232169 | 0.0374003  | 0.23944854 | 1.44393084     | 0.53000164  | 1.55178985  | 0.6339332   |             |             |
| -1.5522878  | -0.5063333 | 0.00748442 | 0.10231843 | 0.70256021     | -0.5098062  | 0.75588805  | -0.40379283 |             |             |

| MINO vs CON  |            |            |            |                |             |             |             |             |             |
|--------------|------------|------------|------------|----------------|-------------|-------------|-------------|-------------|-------------|
| statistic_Mv | dm_MvC     | pvalue_Mv  | adj_pval_M | imputed_scaled | log2_fold_c | fold_change | log2_fold_c | fold_change | log2_fold_c |
| -1.9074320   | -0.345607  | 0.09812708 | 0.48809108 | 0.69162285     | -0.5319426  | 0.83221515  | -0.26497315 |             |             |
| -1.0993003   | -0.2165545 | 0.3080011  | 0.67534471 | 0.76849183     | -0.3798982  | 0.91873231  | -0.1222835  |             |             |
| -1.3359907   | -0.2462157 | 0.22334924 | 0.61943033 | 0.74877151     | -0.4174025  | 0.89692937  | -0.1569493  |             |             |
| -0.7217383   | -0.2776868 | 0.49385225 | 0.76821474 | 0.78880971     | -0.3436644  | 0.95187198  | -0.07116061 |             |             |
| -0.1733323   | -0.0971664 | 0.86729594 | 0.94560399 | 0.89632812     | -0.1578011  | 1.09248676  | 0.12761529  |             |             |
| -0.2553106   | -0.0817701 | 0.80582231 | 0.92643993 | 0.83564286     | -0.2590416  | 1.01541168  | 0.0206647   |             |             |
| -0.7871123   | -0.3664964 | 0.45703363 | 0.74883513 | 0.76103733     | -0.393904   | 0.92188009  | -0.117349   |             |             |
| -0.6058438   | -0.3101203 | 0.5637872  | 0.80205641 | 0.83680802     | -0.2570309  | 1.01282725  | 0.03838813  |             |             |
| -0.5209555   | -0.3159753 | 0.61450562 | 0.83097556 | 0.919561       | -0.209828   | 1.11212398  | 0.15331763  |             |             |
| -1.0051091   | -0.4903669 | 0.34827614 | 0.69479002 | 0.67605107     | -0.5647959  | 0.82191235  | -0.2826425  |             |             |
| -0.2335305   | -0.0554793 | 0.82203184 | 0.91199556 | 0.82828436     | -0.2718019  | 0.98800725  | -0.0718189  |             |             |
| 0.64384809   | 0.0433333  | 0.54018754 | 0.7903383  | 0.90462814     | -0.1446032  | 1.08263311  | 0.11454442  |             |             |
| 1.74644704   | 0.51719665 | 0.12423259 | 0.35380578 | 1.1600749      | 0.46168097  | 1.42702659  | 0.13012118  |             |             |
| 2.9267301    | 0.9257942  | 0.022127   | 0.30919845 | 1.27695463     | 0.35270277  | 1.5331941   | 0.61654035  |             |             |
| -1.4262389   | -0.2700143 | 0.19683715 | 0.59578827 | 0.71611731     | -0.4817322  | 0.86466659  | -0.2097341  |             |             |
| -1.0122475   | -0.1982749 | 0.34512255 | 0.69848379 | 0.76483131     | -0.38773    | 0.92121008  | -0.1183978  |             |             |
| -1.3348318   | -0.1862451 | 0.2263861  | 0.61978339 | 0.75183844     | -0.4115059  | 0.91680216  | -0.1493171  |             |             |
| 0.06492255   | 0.01008251 | 0.95005084 | 0.98447878 | 0.7426877      | -0.1938512  | 1.04060531  | 0.05742229  |             |             |
| 1.03428496   | 0.20911261 | 0.33540662 | 0.69185437 | 1.00746168     | 0.01072497  | 1.19668091  | 0.25785243  |             |             |

# Supplemental table 5

| Method | Polarity | m/z      | RT   | ID                                   | C1      | C3       | C5      | C7      | C8       | O1      | O3      | O4       | O7      | O8       | M3       | M4      | M5      | M7       | M8      | M03      | M04     | M06     | M07      | M08       |
|--------|----------|----------|------|--------------------------------------|---------|----------|---------|---------|----------|---------|---------|----------|---------|----------|----------|---------|---------|----------|---------|----------|---------|---------|----------|-----------|
| EC     | Negative | 379.2473 | 4.84 | 11-HETE [MH+Acetate]                 | 72853   | 89665    | 80417   | 58396   | 95688    | 57633   | 51243   | 42503    | 48360   | 50825    | 38532    | 41536   | 37873   | 45162    | 59025   | 40361    | 49784   | 61398   | 60789    | 135614    |
| EC     | Negative | 411.4447 | 4.84 | 11-HETE [MH+Acetate]                 | 87826   | 114447   | 102391  | 80663   | 106639   | 60666   | 52063   | 59154    | 60666   | 59154    | 37223    | 40638   | 39163   | 40638    | 59154   | 40638    | 90127   | 90127   | 143276   | 143276    |
| EC     | Negative | 317.2122 | 4.03 | 11(S)HEPE [MH]                       | 71956   | 16309    | 30753   | 21450   | 13092    | 82355   | 84500   | 64659    | 77854   | 76165    | 103046   | 80679   | 80845   | 98580    | 82107   | 71262    | 65129   | 67622   | 67622    | 76739     |
| EC     | Negative | 379.2481 | 4.92 | 12-HETE [MH+Acetate]                 | 118385  | 386639   | 209271  | 187399  | 192322   | 195140  | 102522  | 110878   | 114758  | 117177   | 140124   | 100735  | 75976   | 119649   | 246237  | 138589   | 90975   | 104555  | 104555   | 342481    |
| EC     | Negative | 377.2315 | 5.03 | 12-oxoETE [MH+Acetate]               | 69375   | 242374   | 130955  | 88732   | 113666   | 95613   | 84329   | 65922    | 71286   | 76289    | 87975    | 64878   | 65010   | 75628    | 312943  | 113262   | 60815   | 67195   | 126902   | 307998    |
| EC     | Negative | 397.2559 | 4.50 | 12,13-diHETE [MH+Acetate]            | 2603518 | 6181385  | 433984  | 171217  | 137006   | 4951335 | 3102600 | 171000   | 24435   | 395819   | 0        | 150435  | 115285  | 16063    | 25493   | 103073   | 932456  | 330286  | 330286   | 2175997   |
| EC     | Negative | 381.2653 | 5.71 | 15-oxoETE [MH+Acetate]               | 0       | 0        | 89096   | 88703   | 0        | 0       | 175106  | 181761   | 0       | 0        | 150435   | 115285  | 16063   | 25493    | 103073  | 0        | 61037   | 121397  | 0        | 0         |
| EC     | Negative | 379.2485 | 4.71 | 15-HETE [MH+Acetate]                 | 99201   | 297872   | 267184  | 119397  | 175929   | 160137  | 74545   | 97914    | 91844   | 99581    | 107332   | 75990   | 42735   | 84824    | 194803  | 103764   | 6030    | 83767   | 243640   | 608536    |
| EC     | Negative | 377.2314 | 4.60 | 17(18)EETE [MH+Acetate]              | 49020   | 123953   | 147362  | 92713   | 68846    | 88021   | 29908   | 54399    | 61501   | 58401    | 37389    | 61742   | 26379   | 56329    | 36440   | 57815    | 66721   | 12397   | 129602   | 245270    |
| EC     | Negative | 70.847   | 5.0  | 5-oxoETE [MH+Acetate]                | 51629   | 127588   | 65330   | 59025   | 58305    | 58305   | 58305   | 58305    | 58305   | 58305    | 58305    | 58305   | 58305   | 58305    | 58305   | 58305    | 58305   | 58305   | 58305    | 58305     |
| EC     | Negative | 377.2314 | 5.32 | 5-oxoETE [MH+Acetate]                | 39838   | 254917   | 170259  | 78730   | 209627   | 79624   | 75098   | 38499    | 71507   | 70848    | 83737    | 74817   | 9869    | 77367    | 326606  | 1000283  | 25517   | 68401   | 155501   | 129040    |
| EC     | Negative | 379.2482 | 5.66 | 5,6-EET [MH+Acetate]                 | 119229  | 153311   | 138009  | 105172  | 158670   | 122258  | 88244   | 90569    | 95147   | 92300    | 93959    | 70010   | 79184   | 93083    | 87091   | 122724   | 74875   | 74722   | 123860   | 116741    |
| EC     | Negative | 411.2377 | 2.01 | 8-iso-15-keto-PGF2alpha [MH+Acetate] | 110247  | 153401   | 127405  | 180289  | 239415   | 229848  | 142267  | 142833   | 112106  | 110079   | 118829   | 125222  | 79284   | 132431   | 167630  | 119778   | 192892  | 147973  | 31425    | 920478    |
| EC     | Negative | 397.2559 | 4.50 | 8,9-diHETE [MH+Acetate]              | 127306  | 127306   | 127306  | 127306  | 127306   | 127306  | 127306  | 127306   | 127306  | 127306   | 127306   | 127306  | 127306  | 127306   | 127306  | 127306   | 127306  | 127306  | 127306   | 127306    |
| EC     | Negative | 379.2485 | 5.03 | 9-HETE [MH+Acetate]                  | 191799  | 502652   | 493618  | 256066  | 312266   | 363924  | 219685  | 25570    | 270225  | 304412   | 283403   | 221897  | 180737  | 298111   | 367525  | 318761   | 182719  | 112285  | 536655   | 1049780   |
| EC     | Negative | 193.2124 | 4.74 | 9-oxoODE [MH]                        | 193214  | 973111   | 1422291 | 366504  | 781399   | 900880  | 2161158 | 1164928  | 800754  | 819313   | 323791   | 340940  | 226177  | 113081   | 207217  | 152174   | 447443  | 236821  | 258856   | 1491987   |
| EC     | Negative | 313.2388 | 5.34 | 9,10-diHOME [MH]                     | 108006  | 207477   | 199720  | 173237  | 134061   | 184607  | 120240  | 122487   | 129563  | 139902   | 126770   | 121693  | 107174  | 123374   | 213001  | 126424   | 117148  | 111174  | 188138   | 252180    |
| EC     | Negative | 291.2599 | 4.50 | 11-HOME [MH]                         | 539870  | 1216113  | 890988  | 2161158 | 1164928  | 1164928 | 1164928 | 1164928  | 1164928 | 1164928  | 1164928  | 1164928 | 1164928 | 1164928  | 1164928 | 1164928  | 1164928 | 1164928 | 1164928  | 1164928   |
| EC     | Negative | 277.2171 | 6.53 | alpha-Ionic Acid [M-H]               | 293577  | 1064741  | 1306473 | 676105  | 3401971  | 966618  | 304126  | 132342   | 1873055 | 2560654  | 1812899  | 363601  | 759510  | 1865368  | 703435  | 2696818  | 163546  | 173146  | 1793017  | 2195265   |
| EC     | Negative | 331.2646 | 6.53 | Adrenic Acid [M-H]                   | 2604120 | 20312897 | 9236304 | 5760444 | 25212705 | 9106530 | 4526257 | 12304997 | 7600828 | 15179631 | 12893152 | 3510129 | 6162598 | 13240123 | 5412051 | 14232569 | 875968  | 2240337 | 26006113 | 1834400   |
| gHILIC | Positive | 106.0616 | 3.74 | AMINOMIDPATE                         | 94215   | 1275856  | 2054923 | 760122  | 751398   | 701222  | 691335  | 1032869  | 6780111 | 1311832  | 1490089  | 603570  | 1289992 | 1902809  | 868954  | 1731931  | 556732  | 897350  | 187495   | 241854    |
| gHILIC | Positive | 144.0655 | 3.75 | AMINOMIDPATE (MH2OH)                 | 79794   | 675400   | 1268907 | 379015  | 472329   | 365803  | 238303  | 403992   | 435991  | 795951   | 803364   | 236118  | 564599  | 1187848  | 901785  | 228372   | 321466  | 1089135 | 1249592  | 3342893   |
| EC     | Negative | 311.2956 | 6.72 | ARACHIDATE [MH]                      | 1019500 | 5244927  | 3118107 | 2381789 | 4908374  | 3547641 | 2668055 | 2501242  | 3883590 | 3164425  | 3836669  | 1478859 | 1936524 | 3420172  | 2230422 | 4937915  | 3219292 | 1898558 | 3282992  | 3342893   |
| EC     | Negative | 339.3266 | 6.85 | Behenic Acid [M-H]                   | 11645   | 78911    | 62174   | 25996   | 82152    | 47962   | 26181   | 44475    | 55249   | 59814    | 60890    | 0       | 25254   | 70256    | 0       | 97392    | 0       | 0       | 84280    | 59094     |
| EC     | Negative | 266.0892 | 0.56 | DEOXYGLUCOSINE [MH]                  | 70035   | 307186   | 437087  | 222341  | 355184   | 414255  | 119577  | 138886   | 156709  | 408161   | 421728   | 251970  | 446272  | 442872   | 155148  | 53374    | 171293  | 79028   | 57093    | 52026     |
| EC     | Negative | 271.0618 | 0.56 | DEOXYGLUCOSINE (MH+Acetate)          | 47763   | 197617   | 289788  | 144712  | 248483   | 246129  | 195780  | 289788   | 289788  | 289788   | 289788   | 289788  | 289788  | 289788   | 289788  | 289788   | 289788  | 289788  | 289788   | 289788    |
| EC     | Negative | 272.0646 | 0.51 | DEOXYURIDINE [MH]                    | 104030  | 359664   | 516847  | 694806  | 212375   | 109578  | 109578  | 382064   | 638583  | 472271   | 825059   | 1353338 | 452141  | 654290   | 249119  | 506464   | 175990  | 321064  | 410451   | 71380     |
| EC     | Negative | 329.3237 | 2.79 | EC_124,EC_126                        | 175253  | 319787   | 197088  | 161930  | 248004   | 200864  | 150533  | 153313   | 155477  | 147740   | 141157   | 131659  | 156251  | 144558   | 192331  | 211265   | 239186  | 137908  | 20007    | 33884     |
| EC     | Negative | 329.2336 | 2.79 | EC_125,EC_126,EC_129                 | 207393  | 330690   | 227639  | 389644  | 473446   | 473446  | 163754  | 259922   | 240761  | 193660   | 176253   | 158690  | 175729  | 207499   | 289999  | 250502   | 327400  | 184865  | 296327   | 13887     |
| EC     | Negative | 329.2336 | 2.79 | EC_125,EC_126,EC_129                 | 107975  | 150074   | 107975  | 150074  | 107975   | 150074  | 107975  | 150074   | 107975  | 150074   | 107975   | 150074  | 107975  | 150074   | 107975  | 150074   | 107975  | 150074  | 107975   | 150074    |
| EC     | Negative | 329.2338 | 2.52 | EC_128                               | 47076   | 211638   | 93055   | 70578   | 118752   | 213615  | 45033   | 60861    | 63746   | 48107    | 57181    | 48524   | 44929   | 63130    | 106687  | 70397    | 78840   | 55285   | 101953   | 205510    |
| EC     | Negative | 333.2075 | 2.55 | EC_138                               | 63725   | 145973   | 101568  | 72616   | 412852   | 246238  | 38561   | 64233    | 100313  | 81813    | 738446   | 75711   | 80389   | 130499   | 97348   | 52041    | 96798   | 652929  | 303141   |           |
| EC     | Negative | 333.2076 | 2.55 | EC_138,EC_140,EC_145                 | 60062   | 84622    | 63834   | 31176   | 212057   | 211566  | 25771   | 37810    | 51126   | 45094    | 711267   | 47017   | 52388   | 74966    | 65893   | 51722    | 35635   | 63271   | 323140   | 187422    |
| EC     | Negative | 291.2124 | 4.43 | EC_16,EC_18,EC_19                    | 72108   | 77119    | 77119   | 77119   | 77119    | 77119   | 77119   | 77119    | 77119   | 77119    | 77119    | 77119   | 77119   | 77119    | 77119   | 77119    | 77119   | 77119   | 77119    | 77119     |
| EC     | Negative | 293.2124 | 4.54 | EC_16,EC_18                          | 95129   | 174171   | 1494891 | 399112  | 774125   | 1041036 | 164633  | 279435   | 202356  | 310242   | 312166   | 48468   | 238543  | 133368   | 228784  | 142137   | 460460  | 232069  | 238409   | 1417452   |
| EC     | Negative | 295.2280 | 4.43 | EC_20,EC_21                          | 953059  | 2056546  | 2887137 | 1197375 | 4412013  | 1373788 | 1290491 | 1383503  | 872999  | 677831   | 562587   | 1200908 | 914811  | 950545   | 1254700 | 532864   | 2662350 | 408844  |          | unchanged |
| EC     | Negative | 295.2280 | 4.40 | EC_20,EC_21                          | 739059  | 1348005  | 1600306 | 679811  | 799352   | 1070153 | 571919  | 571029   | 643499  | 655386   | 471109   | 367025  | 221153  | 574086   | 678489  | 290904   | 1162655 | 2628416 |          | unchanged |
| EC     | Negative | 294.2280 | 4.40 | EC_21                                | 2898437 | 4422049  | 4422049 | 4422049 | 4422049  | 4422049 | 4422049 | 4422049  | 4422049 | 4422049  | 4422049  | 4422049 | 4422049 | 4422049  | 4422049 | 4422049  | 4422049 | 4422049 | 4422049  | 4422049   |
| EC     | Negative | 295.2280 | 5.02 | EC_23,EC_30                          | 574799  | 2705465  | 2237574 | 934920  | 1265391  | 1144745 | 842764  | 811011   | 778963  | 851757   | 929663   | 690231  | 597107  | 892404   | 3687262 | 1160253  | 623268  | 758663  | 1968098  | 3781786   |
| EC     | Negative | 353.2341 | 3.24 | EC_251,EC_256,EC_260,EC_265          | 32475   | 73059    | 87537   | 44593   | 72327    | 62107   | 40626   | 60209    | 54927   | 70984    | 61335    | 46783   | 39431   | 57450    | 60403   | 63721    | 93936   | 58063   | 116204   | 150021    |
| EC     | Negative | 359.2208 | 3.78 | EC_294,EC_296                        | 110430  | 121120   | 21497   | 123904  | 338764   | 338764  | 102565  | 156213   | 143366  | 80211    | 241749   | 52346   | 118858  | 98055    | 124168  | 152786   | 79389   | 16      |          |           |



|       |          |          |       |         |         |          |          |         |         |         |        |        |         |        |        |        |         |         |        |        |         |         |         |         |          |        |        |
|-------|----------|----------|-------|---------|---------|----------|----------|---------|---------|---------|--------|--------|---------|--------|--------|--------|---------|---------|--------|--------|---------|---------|---------|---------|----------|--------|--------|
| EIC   | Negative | 320.2262 | 4.76  | 0       | 0       | 77470    | 0        | 255893  | 0       | 0       | 0      | 466107 | 301644  | 0      | 0      | 0      | 0       | 0       | 0      | 0      | 0       | 0       | 68592   | 0       | 0        | 0      | 0      |
| PHLIC | Negative | 208.1187 | 1.72  | 160664  | 55634   | 81814    | 708447   | 87797   | 7133564 | 80709   | 72000  | 0      | 92224   | 0      | 0      | 0      | 36063   | 5567896 | 0      | 0      | 0       | 96660   | 1673500 | 0       | 0        | 0      | 163837 |
| EIC   | Negative | 141.9571 | 1.44  | 141957  | 108123  | 108123   | 69445    | 69445   | 69445   | 69445   | 69445  | 69445  | 100423  | 64021  | 61274  | 0      | 61274   | 150273  | 56077  | 0      | 0       | 926187  | 1222674 | 150273  | 0        | 0      | 161764 |
| PHLIC | Negative | 404.1042 | 3.54  | 90460   | 216977  | 216977   | 158531   | 512682  | 4893753 | 62799   | 42000  | 42000  | 47962   | 63980  | 0      | 0      | 138604  | 220760  | 312287 | 0      | 0       | 129678  | 70535   | 130527  | 354746   | 495972 |        |
| EIC   | Negative | 247.9723 | 0.64  | 0       | 40539   | 0        | 0        | 0       | 23600   | 0       | 0      | 25242  | 67947   | 43422  | 0      | 0      | 50370   | 0       | 0      | 0      | 0       | 26402   | 0       | 0       | 0        | 19837  |        |
| EIC   | Negative | 511.1734 | 3.46  | 30152   | 78485   | 78485    | 21857    | 21865   | 36996   | 15510   | 15275  | 22549  | 366764  | 9813   | 103746 | 15403  | 27130   | 152482  | 0      | 0      | 17420   | 20894   | 185378  | 17294   | 46912    |        |        |
| PHLIC | Negative | 103587   | 10.64 | 103587  | 74664   | 235676   | 105927   | 118892  | 58369   | 78219   | 60893  | 107933 | 5313    | 60893  | 57372  | 37158  | 60893   | 57372   | 37158  | 60893  | 57372   | 37158   | 60893   | 57372   | 37158    | 60893  |        |
| EIC   | Negative | 397.2002 | 3.62  | 0       | 29353   | 31339    | 19676    | 58261   | 191982  | 18930   | 23786  | 26441  | 30742   | 70349  | 17004  | 16517  | 45366   | 23446   | 32909  | 0      | 0       | 26645   | 59619   | 0       | 0        | 19837  |        |
| EIC   | Negative | 512.1776 | 3.15  | 44216   | 26520   | 108210   | 18958    | 27051   | 38952   | 23308   | 29803  | 19919  | 387072  | 24102  | 148316 | 22228  | 19715   | 233236  | 0      | 0      | 21733   | 25560   | 254894  | 19379   | 75634    |        |        |
| EIC   | Negative | 511.1740 | 3.15  | 155189  | 89506   | 205659   | 75584    | 88450   | 137836  | 60573   | 83528  | 17552  | 1526681 | 79229  | 578793 | 89506  | 84780   | 863539  | 0      | 0      | 74847   | 78882   | 303269  | 70227   | 269500   |        |        |
| EIC   | Negative | 451.2002 | 0.64  | 0       | 41304   | 0        | 0        | 0       | 0       | 0       | 0      | 0      | 0       | 0      | 0      | 0      | 0       | 0       | 0      | 0      | 0       | 153475  | 0       | 0       | 0        | 41184  |        |
| EIC   | Negative | 307.1506 | 3.15  | 35952   | 83475   | 109659   | 43771    | 97606   | 701646  | 27983   | 56111  | 77689  | 60893   | 67152  | 40756  | 32671  | 38576   | 34422   | 73444  | 42388  | 59811   | 100725  | 104257  | 425512  | 0        |        |        |
| EIC   | Negative | 511.1740 | 2.93  | 37158   | 26793   | 90175    | 29311    | 7468    | 28970   | 18855   | 20351  | 27549  | 300240  | 23222  | 104475 | 16219  | 29198   | 164772  | 0      | 0      | 24762   | 26035   | 181794  | 26931   | 62613    |        |        |
| EIC   | Negative | 461.1822 | 4.15  | 0       | 98872   | 0        | 0        | 0       | 1130964 | 0       | 0      | 0      | 930224  | 0      | 0      | 0      | 1977120 | 0       | 0      | 0      | 0       | 0       | 0       | 0       | 0        | 95719  |        |
| PHLIC | Negative | 307.1545 | 3.03  | 8824    | 74868   | 0        | 0        | 0       | 8824    | 0       | 0      | 0      | 0       | 0      | 0      | 0      | 10045   | 0       | 0      | 0      | 0       | 15707   | 0       | 0       | 0        | 0      |        |
| EIC   | Negative | 307.1545 | 3.14  | 0       | 72053   | 0        | 0        | 0       | 598855  | 0       | 0      | 0      | 0       | 0      | 0      | 0      | 15887   | 0       | 0      | 0      | 0       | 0       | 0       | 0       | 0        | 0      |        |
| PHLIC | Negative | 245.9359 | 0.40  | 2139373 | 300621  | 110222   | 2118296  | 127493  | 94459   | 9465712 | 597522 | 0      | 0       | 0      | 0      | 0      | 4366766 | 291240  | 104281 | 343756 | 97094   | 1320323 | 983413  | 0       | 0        | 504888 |        |
| PHLIC | Negative | 165.9966 | 0.58  | 0       | 947704  | 8940959  | 730067   | 1557482 | 0       | 0       | 0      | 0      | 0       | 0      | 0      | 0      | 348850  | 0       | 0      | 0      | 0       | 229936  | 0       | 0       | 0        | 80818  |        |
| EIC   | Negative | 301.1744 | 2.72  | 175553  | 1730038 | 1633216  | 1914706  | 0       | 0       | 0       | 0      | 0      | 0       | 0      | 0      | 0      | 0       | 0       | 0      | 0      | 0       | 0       | 0       | 0       | 0        | 344645 |        |
| EIC   | Negative | 283.8419 | 2.43  | 0       | 59407   | 505061   | 60263    | 188371  | 0       | 0       | 0      | 0      | 0       | 0      | 0      | 0      | 5114    | 3993    | 44485  | 0      | 0       | 88224   | 30670   | 104720  | 83407    | 85000  |        |
| PHLIC | Positive | 87.1003  | 4.46  | 150398  | 0       | 608618   | 0        | 0       | 0       | 0       | 0      | 0      | 0       | 0      | 0      | 0      | 0       | 0       | 0      | 0      | 0       | 248232  | 0       | 0       | 0        | 0      |        |
| EIC   | Negative | 342.2655 | 6.60  | 0       | 8288    | 194699   | 309323   | 0       | 0       | 0       | 0      | 0      | 0       | 0      | 0      | 0      | 0       | 87767   | 0      | 0      | 0       | 176834  | 0       | 0       | 0        | 7950   |        |
| EIC   | Negative | 370.2061 | 2.53  | 0       | 24295   | 157052   | 54751    | 66513   | 0       | 0       | 0      | 0      | 0       | 0      | 0      | 0      | 19464   | 17954   | 0      | 0      | 0       | 49325   | 24895   | 128958  | 312095   | 0      |        |
| EIC   | Negative | 321.2386 | 5.05  | 0       | 0       | 179497   | 122595   | 0       | 0       | 0       | 0      | 0      | 0       | 0      | 0      | 0      | 0       | 0       | 0      | 0      | 0       | 273305  | 0       | 0       | 0        | 0      |        |
| EIC   | Negative | 321.2386 | 4.85  | 0       | 0       | 0        | 0        | 0       | 0       | 0       | 0      | 0      | 0       | 0      | 0      | 0      | 0       | 0       | 0      | 0      | 0       | 114662  | 0       | 0       | 0        | 0      |        |
| EIC   | Negative | 370.2059 | 2.67  | 0       | 8288    | 134585   | 44482    | 51233   | 0       | 0       | 0      | 0      | 0       | 0      | 0      | 0      | 0       | 0       | 0      | 0      | 0       | 179491  | 0       | 0       | 0        | 0      |        |
| EIC   | Negative | 365.0074 | 2.01  | 0       | 86425   | 53920    | 34013    | 57379   | 0       | 0       | 0      | 0      | 0       | 0      | 0      | 0      | 0       | 0       | 0      | 0      | 0       | 42790   | 0       | 0       | 0        | 37480  |        |
| EIC   | Negative | 403.3066 | 3.99  | 0       | 0       | 0        | 0        | 0       | 0       | 0       | 0      | 0      | 0       | 0      | 0      | 0      | 0       | 0       | 0      | 0      | 0       | 0       | 0       | 0       | 0        | 181329 |        |
| EIC   | Negative | 349.2791 | 4.99  | 0       | 0       | 0        | 0        | 0       | 0       | 0       | 0      | 0      | 0       | 0      | 0      | 0      | 0       | 0       | 0      | 0      | 0       | 0       | 0       | 0       | 0        | 155181 |        |
| EIC   | Negative | 349.2791 | 5.87  | 0       | 0       | 0        | 0        | 0       | 0       | 0       | 0      | 0      | 0       | 0      | 0      | 0      | 0       | 0       | 0      | 0      | 0       | 0       | 0       | 0       | 0        | 49507  |        |
| EIC   | Negative | 628.3134 | 4.93  | 0       | 0       | 0        | 0        | 0       | 0       | 0       | 0      | 0      | 0       | 0      | 0      | 0      | 0       | 0       | 0      | 0      | 0       | 0       | 0       | 0       | 0        | 182611 |        |
| EIC   | Negative | 356.2269 | 4.89  | 0       | 0       | 8167     | 0        | 0       | 0       | 0       | 0      | 0      | 0       | 0      | 0      | 0      | 0       | 0       | 0      | 0      | 0       | 0       | 0       | 0       | 0        | 93265  |        |
| PHLIC | Negative | 150.0018 | 0.52  | 76530   | 1011929 | 12446676 | 1241035  | 2354853 | 0       | 0       | 105238 | 0      | 0       | 0      | 0      | 0      | 1262004 | 0       | 0      | 0      | 1043950 | 3489    | 0       | 0       | 0        | 93344  |        |
| EIC   | Negative | 232.0047 | 1.54  | 0       | 80145   | 521600   | 137594   | 220802  | 0       | 0       | 10185  | 2651   | 0       | 0      | 0      | 0      | 136818  | 11254   | 71240  | 0      | 0       | 5198    | 0       | 0       | 0        | 26336  |        |
| EIC   | Negative | 329.6414 | 2.72  | 12114   | 120292  | 428722   | 125264   | 1485046 | 4104    | 15787   | 3904   | 0      | 4300    | 3527   | 185453 | 14201  | 63685   | 5985    | 7622   | 10057  | 57881   | 34768   | 0       | 0       | 34768    |        |        |
| EIC   | Negative | 331.0087 | 2.44  | 0       | 175872  | 171262   | 94254    | 192557  | 0       | 0       | 0      | 0      | 0       | 0      | 0      | 0      | 0       | 0       | 0      | 0      | 0       | 14020   | 0       | 0       | 0        | 15970  |        |
| EIC   | Negative | 309.0264 | 2.44  | 0       | 144942  | 313797   | 136465   | 234426  | 0       | 0       | 3853   | 3219   | 5812    | 24940  | 0      | 0      | 23273   | 131324  | 0      | 0      | 0       | 35253   | 2778    | 0       | 0        | 12642  |        |
| PHLIC | Negative | 343.9953 | 3.59  | 44996   | 3664486 | 32114998 | 2790369  | 3587524 | 88331   | 0       | 432084 | 61071  | 921113  | 60404  | 492392 | 303352 | 3728501 | 0       | 0      | 0      | 1802911 | 42169   | 108498  | 1835438 | 3097086  |        |        |
| EIC   | Negative | 249.0051 | 2.44  | 0       | 99499   | 9147223  | 0        | 0       | 0       | 0       | 4277   | 4639   | 16995   | 0      | 0      | 0      | 10052   | 92098   | 0      | 0      | 0       | 312     | 0       | 0       | 0        | 7958   |        |
| EIC   | Negative | 249.0051 | 2.44  | 20364   | 594858  | 1100428  | 690174   | 954676  | 0       | 0       | 24069  | 136819 | 160571  | 0      | 0      | 0      | 512684  | 74251   | 0      | 0      | 0       | 119096  | 4859    | 149759  | 145438   | 6585   |        |
| PHLIC | Negative | 344.9972 | 3.59  | 0       | 531928  | 4369988  | 361416   | 496899  | 0       | 0       | 87983  | 52205  | 88769   | 0      | 0      | 0      | 77270   | 36691   | 482202 | 0      | 0       | 243363  | 140225  | 240369  | 455927   | 0      |        |
| PHLIC | Negative | 112.0042 | 0.96  | 0       | 231466  | 574110   | 106602   | 195499  | 0       | 0       | 73039  | 0      | 0       | 0      | 0      | 0      | 61306   | 0       | 0      | 0      | 0       | 53962   | 0       | 0       | 0        | 118095 |        |
| PHLIC | Negative | 112.0042 | 0.96  | 0       | 231466  | 574110   | 106602   | 195499  | 0       | 0       | 73039  | 0      | 0       | 0      | 0      | 0      | 61306   | 0       | 0      | 0      | 0       | 53962   | 0       | 0       | 0        | 118095 |        |
| PHLIC | Positive | 346.0085 | 3.59  | 38390   | 451837  | 5601130  | 457239   | 499513  | 0       | 0       | 29621  | 37808  | 48480   | 101279 | 0      | 0      | 238293  | 37893   | 405979 | 0      | 0       | 187949  | 0       | 0       | 0        | 203600 |        |
| PHLIC | Negative | 192.0037 | 0.53  | 1639636 | 0       | 326070   | 162624   | 2055021 | 0       | 0       | 61013  | 103967 | 127660  | 0      | 0      | 0      | 269781  | 1037711 | 104756 | 270273 | 314682  | 2537689 | 240695  | 363152  | 0        | 533805 |        |
| EIC   | Negative | 359.0148 | 0.95  | 3807911 | 16326   | 19711    | 77064    | 103128  | 31090   | 296127  | 51637  | 16469  | 0       | 0      | 0      | 0      | 15040   | 320063  | 9534   | 9261   | 46586   | 11498   | 1218019 | 108764  | 9665     | 0      |        |
| EIC   | Negative | 282.3163 | 6.46  | 0       | 5374782 | 5374782  | 2703811  | 1023234 | 6278981 | 168235  | 308683 | 333637 | 445207  | 0      | 0      | 0      | 5057762 | 224168  | 331973 | 0      | 0       | 4554068 | 512078  | 378457  | 14584722 | 437023 |        |
| PHLIC | Negative | 144.0301 | 0.97  | 85453   | 1006580 | 4305427  | 766419   | 1107882 | 64579   | 353242  | 74266  | 107222 | 69133   | 46955  | 252249 | 96906  | 586082  | 40002   | 272136 | 92971  | 150350  | 378624  | 469908  | 0       | 0        | 469908 |        |
| EIC   | Negative | 401.2340 | 5.47  | 0       | 96911   | 96623    | 69005    | 118789  | 23857   | 0       | 0      | 22885  | 0       | 0      | 0      | 0      | 39216   | 16740   | 0      | 0      | 0       | 15457   | 13013   | 31783   | 50421    | 54102  |        |
| EIC   | Negative | 356.1428 | 3.16  | 208118  | 135466  | 109166   | 151025   | 153647  | 47375   | 0       | 0      | 0      | 0       | 0      | 0      | 0      | 0       | 0       | 0      | 0      | 0       | 32658   | 32064   | 0       | 0        | 76821  |        |
| EIC   | Negative | 370.1264 | 2.70  | 90784   | 270793  | 52736    | 143464   | 216704  | 0       | 0       | 80178  | 44341  | 64925   | 0      | 0      | 0      | 51889   | 0       | 0      | 0      | 0       | 325353  | 88564   | 74988   | 412795   | 17786  |        |
| EIC   | Negative | 333.2123 | 4.92  | 0       | 55416   | 56060    | 26632    | 27089   | 0       | 0       | 5589   | 0      | 0       | 0      | 0      | 0      | 0       | 0       | 0      | 0      | 0       | 30691   | 0       | 0       | 0        | 141088 |        |
| EIC   | Negative | 359.1027 | 1.68  | 184533  | 133885  | 94254    | 149270   | 136830  | 0       | 0       | 37694  | 11444  | 33829   | 0      | 0      | 0      | 26984   | 30727   | 0      | 0      | 0       | 34266   | 17486   | 75359   | 79739    | 50113  |        |
| EIC   | Negative | 441.0173 | 0.45  | 1723786 | 33582   | 24085    | 66012    | 46686   | 47717   | 103170  | 41227  | 35116  | 0       | 0      | 0      | 0      | 20396   | 246503  | 33690  | 13855  | 46323   | 22292   | 544680  | 69313   | 29206    | 21305  |        |
| EIC   | Negative | 252.0025 | 0.91  | 0       | 51116   | 1610516  | 16653011 | 2343729 | 239060  | 0       | 0      | 0      | 0       | 0</    |        |        |         |         |        |        |         |         |         |         |          |        |        |



|        |          |          |         |          |         |         |          |          |         |         |         |         |          |         |         |         |         |          |          |         |         |         |         |
|--------|----------|----------|---------|----------|---------|---------|----------|----------|---------|---------|---------|---------|----------|---------|---------|---------|---------|----------|----------|---------|---------|---------|---------|
| EC     | Negative | 366.0332 | 0.46    | 1020705  | 29981   | 45203   | 86767    | 65317    | 57167   | 180970  | 76324   | 44416   | 23640    | 28558   | 231316  | 57914   | 26206   | 71235    | 22142    | 351044  | 72509   | 42792   | 30325   |
| EC     | Negative | 293.1764 | 3.53    | 341469   | 365492  | 361122  | 370711   | 421395   | 140485  | 107642  | 98358   | 117257  | 113060   | 98627   | 140402  | 133670  | 141627  | 118014   | 106415   | 155667  | 152196  | 176322  | 148981  |
| PHILIC | Negative | 6768117  | 4044786 | 2514708  | 1912924 | 1329264 | 8708157  | 6052620  | 1701038 | 305664  | 901207  | 805624  | 969520   | 171277  | 812721  | 790124  | 1654021 | 2281051  | 1683448  | 1724049 | 3605207 | 3765114 | 3610007 |
| EC     | Negative | 293.1423 | 3.59    | 142426   | 406620  | 71639   | 42029    | 44547    | 44186   | 31075   | 41787   | 51925   | 52442    | 51168   | 23254   | 26162   | 56664   | 38697    | 28209    | 51070   | 73663   | 44894   | 32752   |
| EC     | Negative | 332.2680 | 6.54    | 1046374  | 346148  | 3068085 | 2187315  | 10121717 | 190628  | 1456339 | 190628  | 221518  | 257502   | 210629  | 1384374 | 2446998 | 4297860 | 2096679  | 4360874  | 300840  | 759371  | 393754  | 264627  |
| EC     | Negative | 582.3778 | 5.17    | 431299   | 1265529 | 0       | 0        | 1127824  | 0       | 898180  | 0       | 1792617 | 0        | 1792617 | 0       | 1491894 | 0       | 349637   | 0        | 349637  | 0       | 1862199 | 0       |
| EC     | Negative | 109976   | 4.13    | 109976   | 41296   | 46072   | 23013    | 23013    | 20213   | 20144   | 31393   | 36189   | 35619    | 22862   | 17416   | 19195   | 18822   | 41851    | 39607    | 54607   | 15853   | 18180   | 34527   |
| EC     | Negative | 458.9955 | 0.46    | 315841   | 329542  | 243764  | 359980   | 315427   | 278735  | 501824  | 237474  | 218744  | 184187   | 209572  | 721252  | 209508  | 226051  | 221641   | 269734   | 2566216 | 347581  | 140159  | 204829  |
| EC     | Negative | 481.2967 | 2.62    | 1502357  | 429184  | 256996  | 142815   | 164116   | 169347  | 239776  | 159871  | 104601  | 143307   | 341684  | 221177  | 81324   | 202625  | 119187   | 197795   | 290020  | 274593  | 121464  | 84664   |
| EC     | Negative | 540.0005 | 0.46    | 540802   | 50998   | 33381   | 73363    | 53865    | 50769   | 1010210 | 42303   | 35901   | 20855    | 13475   | 130487  | 35813   | 33510   | 18826    | 22501    | 341083  | 65140   | 28277   | 22605   |
| EC     | Negative | 249.1792 | 2.98    | 839283   | 870555  | 853289  | 843485   | 916920   | 814020  | 5176    | 41680   | 76426   | 41680    | 268657  | 279555  | 336702  | 355899  | 332043   | 270075   | 322429  | 421122  | 415999  | 410884  |
| EC     | Negative | 349.2053 | 6.30    | 597112   | 540960  | 1021557 | 1112480  | 1410183  | 425147  | 138670  | 142955  | 316333  | 555129   | 219821  | 156796  | 6806920 | 1147634 | 15554593 | 33904    | 261912  | 196087  | 93161   | 422000  |
| EC     | Negative | 1202.208 | 1.5258  | 196898   | 196898  | 214045  | 235212   | 82229    | 31750   | 25178   | 66016   | 107660  | 424819   | 113917  | 230722  | 147724  | 224472  | 3061603  | 68747    | 50240   | 17863   | 112447  | 79831   |
| EC     | Negative | 375.1792 | 2.98    | 369628   | 351967  | 323283  | 333792   | 375757   | 111043  | 128866  | 110161  | 121171  | 120939   | 92403   | 113815  | 150519  | 142691  | 121515   | 117841   | 122425  | 106072  | 109509  | 156590  |
| PHILIC | Negative | 244.0463 | 1.00    | 0        | 447543  | 0       | 76757    | 521061   | 0       | 49334   | 65564   | 245158  | 0        | 42215   | 0       | 457344  | 0       | 822118   | 0        | 32697   | 44206   | 84767   | 394078  |
| EC     | Negative | 313.0724 | 2.48    | 63541    | 11695   | 26322   | 0        | 12909    | 26252   | 0       | 3604    | 9923    | 0        | 6223    | 3363    | 0       | 580936  | 3045     | 16135    | 8509    | 0       | 82867   | 329629  |
| PHILIC | Positive | 259.1282 | 2.73    | 0        | 593686  | 0       | 37609    | 1391433  | 39327   | 67202   | 155264  | 203708  | 249524   | 30511   | 80792   | 127987  | 1120004 | 0        | 311321   | 34190   | 112154  | 900080  | 348527  |
| EC     | Negative | 293.1762 | 2.98    | 4425462  | 4860063 | 4662392 | 4511112  | 4934434  | 1787847 | 1655975 | 1413145 | 1698772 | 1737077  | 1434033 | 1439577 | 1775877 | 1855027 | 1685369  | 1482515  | 1661152 | 2189211 | 2231404 | 2269758 |
| EC     | Negative | 358.2630 | 1.99    | 6465904  | 110173  | 6370551 | 6993864  | 104670   | 105877  | 105958  | 6577284 | 100797  | 6261158  | 6121117 | 6492679 | 106454  | 6218146 | 102522   | 104024   | 6480877 | 4890546 | 6524903 | 6524903 |
| EC     | Negative | 317.1398 | 3.76    | 706567   | 877728  | 529911  | 529911   | 746448   | 231885  | 334946  | 205748  | 266782  | 279050   | 203992  | 185953  | 272343  | 235234  | 244291   | 326641   | 189010  | 218273  | 382092  | 365026  |
| EC     | Negative | 425.0648 | 1.68    | 179767   | 140948  | 135398  | 50575    | 337115   | 84362   | 57781   | 57709   | 75027   | 27057    | 50912   | 63319   | 44505   | 97528   | 63574    | 540079   | 52967   | 57514   | 60719   | 152550  |
| EC     | Negative | 294.1792 | 2.98    | 839283   | 870555  | 853289  | 843485   | 916920   | 814020  | 5176    | 41680   | 76426   | 41680    | 268657  | 279555  | 336702  | 355899  | 332043   | 270075   | 322429  | 421122  | 415999  | 410884  |
| EC     | Negative | 270.6327 | 2.83    | 33205    | 16904   | 36150   | 67853    | 0        | 0       | 28856   | 0       | 29136   | 0        | 0       | 0       | 0       | 135854  | 0        | 0        | 0       | 32208   | 154412  | 0       |
| EC     | Negative | 318.1431 | 3.75    | 144376   | 172102  | 102749  | 148385   | 149204   | 53142   | 67886   | 44647   | 53241   | 55054    | 43908   | 40719   | 55621   | 47775   | 51267    | 60085    | 41555   | 62038   | 82389   | 78131   |
| EC     | Negative | 354.2371 | 2.25    | 13181    | 116139  | 209938  | 118496   | 183839   | 47312   | 31383   | 64774   | 65893   | 69570    | 85234   | 28892   | 51383   | 92039   | 60632    | 0        | 22945   | 34921   | 189318  | 293844  |
| EC     | Negative | 530.2800 | 1.46    | 0        | 18285   | 0       | 57938    | 29313    | 0       | 0       | 0       | 28994   | 0        | 43761   | 23230   | 26639   | 10450   | 54447    | 51557    | 23150   | 14501   | 58948   | 59486   |
| EC     | Negative | 457.9984 | 0.46    | 441475   | 51578   | 35004   | 65219    | 84258    | 50532   | 83714   | 42289   | 50946   | 23985    | 33721   | 109364  | 35198   | 38377   | 29365    | 42476    | 343565  | 67967   | 25429   | 38077   |
| EC     | Negative | 251.1323 | 2.08    | 145839   | 86855   | 69522   | 0        | 99282    | 61548   | 40198   | 0       | 0       | 0        | 72229   | 0       | 76839   | 72844   | 0        | 54018    | 0       | 108753  | 106079  | 0       |
| EC     | Negative | 249.1496 | 5.30    | 1411172  | 3578094 | 2417678 | 1937607  | 3344360  | 983568  | 800046  | 679311  | 1388786 | 1196807  | 920194  | 489383  | 974304  | 1086303 | 937161   | 1449974  | 384553  | 998903  | 1834143 | 1661494 |
| EC     | Negative | 250.678  | 2.54    | 162068   | 61326   | 415476  | 320239   | 179236   | 135909  | 112300  | 77532   | 117428  | 77532    | 161605  | 181189  | 104815  | 161605  | 181189   | 104815   | 231074  | 6183    | 165055  | 287375  |
| PHILIC | Positive | 173.0355 | 2.46    | 977452   | 440180  | 258611  | 101647   | 268760   | 101647  | 268760  | 101647  | 175064  | 118750   | 225539  | 295124  | 487849  | 151805  | 355591   | 272430   | 181260  | 170279  | 399862  | 234577  |
| PHILIC | Positive | 399.2504 | 0.41    | 10029129 | 3435685 | 2739995 | 11748206 | 3493370  | 3827315 | 1940588 | 2650906 | 1874697 | 11196831 | 6848720 | 1803751 | 4981860 | 3021510 | 1804810  | 15665010 | 2536488 | 1748812 | 2229853 | 3842490 |
| PHILIC | Negative | 199.0377 | 1.81    | 4043707  | 1413543 | 1239968 | 6144711  | 2491083  | 971251  | 3675129 | 397579  | 1120748 | 3076861  | 779036  | 1217496 | 1734626 | 1791781 | 1778391  | 615792   | 2316944 | 1682207 | 3842490 | 3842490 |
| PHILIC | Negative | 375.2155 | 4.74    | 13409    | 81983   | 128384  | 30821    | 68712    | 78520   | 0       | 0       | 0       | 15680    | 15109   | 0       | 10310   | 0       | 5482     | 11728    | 0       | 0       | 111686  | 336766  |
| PHILIC | Positive | 400.2334 | 0.41    | 824700   | 2337831 | 871855  | 577882   | 2525986  | 670051  | 820508  | 413305  | 495348  | 479930   | 2255089 | 819710  | 380732  | 1152605 | 562064   | 424560   | 3211385 | 560051  | 322266  | 364480  |
| EC     | Negative | 238.9912 | 1.68    | 2999118  | 284011  | 220143  | 96224    | 565496   | 203003  | 95248   | 91792   | 136401  | 100859   | 100859  | 157528  | 152101  | 100859  | 157528   | 152101   | 183515  | 105488  | 137648  | 247894  |
| EC     | Negative | 237.0990 | 1.68    | 705533   | 683481  | 519636  | 239408   | 1365834  | 484104  | 238224  | 215345  | 330408  | 226590   | 315560  | 632042  | 219304  | 380861  | 377974   | 1933286  | 275302  | 328334  | 547973  | 613382  |
| EC     | Negative | 431.3015 | 3.03    | 176649   | 136652  | 142767  | 142633   | 128303   | 0       | 153934  | 0       | 0       | 0        | 0       | 0       | 139298  | 142605  | 148795   | 105981   | 0       | 0       | 156639  | 136210  |
| EC     | Negative | 236.0961 | 1.68    | 6354966  | 632068  | 4836475 | 1713852  | 1119326  | 4341319 | 2226264 | 1905071 | 3040355 | 2004742  | 2846670 | 5781088 | 2058612 | 3463563 | 1477596  | 17758403 | 2471153 | 3059012 | 4958021 | 5649585 |
| EC     | Negative | 357.1084 | 5.36    | 69992    | 79620   | 43456   | 17248    | 109560   | 0       | 37686   | 99709   | 0       | 79687    | 0       | 63141   | 10716   | 69382   | 18250    | 0        | 19343   | 85353   | 71606   | 0       |
| PHILIC | Positive | 453.3253 | 0.40    | 3762601  | 0       | 2226632 | 1723224  | 20060752 | 0       | 1952391 | 1044409 | 1075638 | 0        | 2140110 | 210386  | 2221187 | 2297865 | 2128115  | 1939929  | 1352832 | 0       | 2203942 | 0       |
| PHILIC | Positive | 201.0519 | 1.81    | 103971   | 533535  | 433546  | 1807803  | 742534   | 316566  | 501520  | 146075  | 299885  | 329072   | 816742  | 284095  | 392279  | 595374  | 280094   | 617104   | 205782  | 756624  | 1364233 | 1364233 |
| EC     | Negative | 513.2727 | 1.70    | 67092    | 24269   | 247657  | 424928   | 610261   | 29529   | 7298    | 11007   | 489887  | 68826    | 214501  | 31443   | 66579   | 35344   | 140191   | 146200   | 27325   | 76007   | 1391889 | 237880  |
| EC     | Negative | 255.0660 | 2.42    | 3319066  | 44924   | 99718   | 56140    | 45461    | 98979   | 30556   | 36899   | 46982   | 26896    | 124688  | 25366   | 66989   | 1554493 | 46011    | 18949    | 41162   | 44700   | 118949  | 104034  |
| PHILIC | Positive | 140.0530 | 2.47    | 1091436  | 493661  | 192809  | 62621    | 196310   | 93982   | 327486  | 235194  | 158202  | 97989    | 113703  | 438557  | 455078  | 202831  | 300139   | 355124   | 91802   | 101097  | 472354  | 226104  |
| EC     | Negative | 512.2692 | 1.70    | 178801   | 58799   | 836946  | 1392076  | 2046265  | 80165   | 42394   | 48829   | 1651694 | 222121   | 710345  | 1000309 | 208181  | 175156  | 460672   | 472026   | 75005   | 269975  | 4702221 | 780016  |
| EC     | Negative | 379.2480 | 5.96    | 127829   | 551741  | 411270  | 166067   | 345832   | 165550  | 137371  | 139601  | 138966  | 1473247  | 138434  | 110912  | 107937  | 143890  | 566556   | 221972   | 108030  | 2101567 | 2101567 | 713104  |
| EC     | Negative | 362.2915 | 3.47    | 218031   | 3116163 | 209734  | 402667   | 290248   | 227000  | 99888   | 95479   | 137315  | 94046    | 138700  | 71220   | 117061  | 112992  | 132747   | 110063   | 92829   | 221005  | 167133  | 139562  |
| PHILIC | Positive | 176.0912 | 2.63    | 77148    | 517331  | 2023359 | 72465    | 550045   | 195726  | 178417  | 391155  | 289340  | 420115   | 102368  | 240646  | 266014  | 714589  | 139540   | 483304   | 1514739 | 161342  | 486592  | 686513  |
| EC     | Negative | 298.2469 | 5.96    | 219958   | 1187610 | 918494  | 345046   | 812844   | 374140  | 277603  |         |         |          |         |         |         |         |          |          |         |         |         |         |



|             |            |            |             |             |            |            |            |              |              |              |             |             |             |              |             |               |              |              |              |             |              |              |              |              |             |
|-------------|------------|------------|-------------|-------------|------------|------------|------------|--------------|--------------|--------------|-------------|-------------|-------------|--------------|-------------|---------------|--------------|--------------|--------------|-------------|--------------|--------------|--------------|--------------|-------------|
| 294.1792    | -7.3801856 | -1.2243773 | 0.000151865 | 0.000704972 | 0.35710137 | -1.485594  | 0.38235694 | -1.38700802  | 0.622684386  | 0.140247993  | 0.550824655 | 0.868511102 | 1.182065378 | 0.24130983   | 0.971434809 | -0.0481810912 | -6.11470097  | -1.108671    | 0.000484025  | 0.008203368 | 0.360408885  | -1.477201523 | 0.403553308  | -1.309161683 |             |
| 412.2137    | 2.0923237  | 0.4580205  | 0.077695568 | 0.210251897 | 1.18441047 | 0.24418915 | 1.12382754 | 0.181201216  | -1.421351151 | -0.368561773 | 0.184799209 | 0.67909986  | 0.790093881 | -0.33994006  | 0.71496392  | -0.48405753   | 1.472811875  | 0.34871205   | 0.18403498   | 0.44473217  | 0.19552211   | -0.012738041 | 1.044814346  | 0.062643535  |             |
| 331.0413    | -2.6673686 | -0.8715955 | 0.031212008 | 0.103958497 | 0.45953508 | -1.1217531 | 0.49725076 | -1.007954524 | 0.6698784    | 0.19232864   | 0.521797159 | 0.856999201 | 1.198367129 | 0.261069956  | 0.911532794 | -0.133835333  | -1.914923258 | -0.533915808 | 0.097052218  | 0.305387874 | 0.540257505  | -0.888280887 | 0.579387174  | -0.787400347 |             |
| 383.2207    | -2.4147858 | -0.9818762 | 0.046846609 | 0.142542427 | 0.46887406 | -1.0927076 | 0.45481405 | -1.195653268 | 0.77741246   | 0.160981517  | 0.786497196 | 0.94622983  | 1.305703503 | 0.384882574  | 0.959549005 | -0.059571607  | -2.666482251 | -1.328909081 | 0.032163314  | 0.152668228 | 0.368195158  | -1.441457441 | 0.349710263  | -0.515789372 |             |
| 399.2504    | -3.330241  | -1.0850189 | 0.038888119 | 0.122515096 | 0.33688887 | -1.4791351 | 0.44346284 | -1.17953561  | 0.17031276   | 0.134120776  | 0.869023079 | 0.99823252  | 1.73344239  | 0.793556661  | 1.117883503 | 1.09826721    | -0.718763887 | -0.376581077 | 0.495573051  | 0.759867583 | 0.633130608  | -0.654874533 | 0.613770644  | -0.70422845  |             |
| 318.1431    | -0.0647075 | -1.0979472 | 0.004787313 | 0.025417935 | 0.38558066 | -1.3748954 | 0.42029974 | -1.24430563  | 0.643203404  | 0.131731406  | 0.53808786  | 0.862071616 | 1.18333842  | 0.242857266  | 0.845120954 | -0.24277026   | -5.182528995 | -1.182653316 | 0.001277325  | 0.016450297 | 0.336776235  | -1.570132223 | 0.369765186  | -1.435138695 |             |
| 248.1496    | -4.283706  | -1.1037321 | 0.008468973 | 0.01228976  | 0.17626537 | -1.4102236 | 0.42022388 | -1.250730609 | 0.35588847   | 0.099214421  | 0.82621255  | 0.86199369  | 1.251604779 | 0.228848577  | 0.85641758  | -0.223080257  | -4.821084288 | -1.108771399 | 0.002219104  | 0.019793179 | 0.327749684  | -1.60483808  | 0.376610692  | -1.408804336 |             |
| 359.2208    | 2.3547973  | 1.2929861  | 0.050765884 | 0.150608711 | 1.83359797 | 0.87655331 | 1.86592387 | 0.898980204  | -0.35496641  | -0.072388173 | 0.826524838 | 0.959044444 | 0.97104774  | 0.442385819  | 0.728022786 | -0.39961083   | 2.009444667  | 0.064493051  | 0.283777379  | 1.617167781 | 0.693469366  | 1.498946238  | 0.683763556  | -0.585706356 |             |
| 403.2701    | -3.7280814 | -0.8047314 | 0.007389717 | 0.03318127  | 0.47729955 | -1.0670331 | 0.48612593 | -1.046597992 | 0.39642022   | 0.09852828   | 0.702001898 | 0.956912137 | 1.139295994 | 0.180223616  | 0.982376148 | -0.025335848  | -2.212828214 | -0.667617141 | 0.062535298  | 0.236838809 | 0.498987714  | -1.000254543 | 0.567143484  | -0.81821432  |             |
| 262.2915    | -3.8883005 | -0.7873762 | 0.006003352 | 0.029830253 | 0.50569961 | -0.9836474 | 0.52449319 | -0.91112322  | 0.339230943  | 0.098749438  | 0.742096465 | 0.963971151 | 1.117579953 | 0.160379465  | 0.954972921 | -0.067011773  | -3.249702253 | -0.812247446 | 0.001386606  | 0.016247176 | 0.442034841  | -1.174507935 | 0.47632302   | -1.070264648 |             |
| 402.2334    | -2.7189473 | -1.0596555 | 0.02897215  | 0.098500078 | 0.36579683 | -1.4508855 | 0.46178645 | -1.114702244 | 0.88078046   | 0.071284517  | 0.931432065 | 0.99823252  | 1.70000208  | 0.765432923  | 2.106555273 | 1.074200748   | -0.655846602 | -0.338482932 | 0.532878763  | 0.78715701  | 0.656848512  | -0.606806757 | 0.65782882   | -0.60421706  |             |
| 11 HETE (M) | 379.2473   | -3.6538141 | -0.4903534  | 0.00815176  | 0.0356667  | 0.9190735  | -0.7565567 | 0.65063066   | -0.621408349 | 0.521734437  | 0.146454871 | 0.61897951  | 0.9222782   | 1.306811277  | 0.388279129 | 0.95999488    | -0.68890347  | -3.598714612 | -0.570725258 | 0.008754804 | 0.054679124  | 0.524732986  | -0.93034661  | 0.616802861  | -0.71108713 |
| 250.1328    | -3.8825445 | -1.0717315 | 0.006031164 | 0.028028052 | 0.3810321  | -1.3030092 | 0.42464287 | -1.22975637  | 0.192197711  | 0.057731865  | 0.852376432 | 0.99823252  | 1.22083011  | 0.287486808  | 0.811332828 | -0.266501813  | -4.375850986 | -1.222474603 | 0.003120797  | 0.027543478 | 0.319182005  | -1.644225004 | 0.368116108  | -1.441766863 |             |
| 459.2144    | -1.9380917 | -0.4885116 | 0.091751381 | 0.24173852  | 0.58434949 | -0.7759966 | 0.64218088 | -0.638948395 | 0.377959399  | 0.110026417  | 0.713291848 | 0.95925058  | 1.318103134 | 0.399597366  | 0.915711282 | -0.124202229  | -1.98805091  | -1.207311335 | 0.153940622  | 0.41206366  | 0.55622615   | -0.845477411 | 0.702389502  | -0.509656813 |             |
| 298.2469    | -1.8341048 | -0.7993066 | 0.026054206 | 0.026048051 | 0.4034248  | -1.0996189 | 0.49423245 | -1.058472737 | 0.224833841  | 0.036247231  | 0.827740653 | 0.99823252  | 1.12494383  | 0.204799207  | 0.82604871  | -0.26004871   | -0.703781819 | -0.444429509 | 0.304299181  | 0.76399611  | 0.63867675   | -0.802996652 | 0.839646412  | -0.252488895 |             |
| 5 HETE (M)  | 379.2471   | -2.885611  | -0.5629334  | 0.02026759  | 0.07152622 | 0.56961706 | -0.8119157 | 0.63218472   | 0.118811397  | 0.039797609  | 0.9008154   | 0.99823252  | 1.24896435  | 0.349638313  | 0.863947613 | -0.21098426   | -1.57807512  | -0.45977915  | 0.15956113   | 0.416487311 | 0.59183159   | -0.756741391 | 0.718984474  | -0.490246692 |             |
| 379.248     | -2.3812824 | -0.8645235 | 0.048794054 | 0.145972127 | 0.40361335 | -1.3089542 | 0.49431109 | -1.04560881  | 0.132412891  | 0.022611596  | 0.897927879 | 0.99823252  | 1.129185466 | 0.17528272   | 0.812690651 | -0.29921221   | -0.950202577 | -0.539244288 | 0.373370216  | 0.461292423 | 0.598416376  | -0.75010135  | 0.796514938  | -0.328226676 |             |
| 250.081     | -3.6876306 | -2.9928673 | 0.007949683 | 0.029493088 | 0.15515788 | -2.6881911 | 0.18379794 | -2.361408646 | 0.004893372  | 0.020402058  | 0.99973187  | 1.06822363  | 0.909139972 | 1.051410873  | 0.147195992 | -1.570447184  | -1.19046211  | 0.009091481  | 0.055802886  | 0.237314662 | -1.075127464 | 0.23899519   | -1.126898827 | -1.126898827 |             |
| 297.2436    | -1.8630027 | -0.7912706 | 0.104748663 | 0.262680925 | 0.40737849 | -1.2955454 | 0.49613756 | -1.021187296 | 0.078464883  | 0.012029136  | 0.93988445  | 0.99823252  | 1.17297229  | 0.812477787  | 0.239640748 | -0.711668273  | -0.445320461 | 0.499693198  | 0.760217003  | 0.616123094 | -0.698709482 | 0.838357495  | -0.254265221 |              |             |
| 379.2482    | -3.999885  | -0.2628135 | 0.06427414  | 0.14445123  | 0.6946407  | -0.5267    | 0.75053996 | -0.413999972 | -0.370550946 | -0.042216784 | 0.720951538 | 0.95925058  | 1.049977094 | 0.070074566  | 0.790820788 | -0.3385773    | -5.417812247 | -0.32022902  | 0.00989026   | 0.01417546  | 0.620967409  | -0.897633997 | 0.682890207  | -0.55027945  |             |
| 383.2955    | -4.1049511 | -0.6306651 | 0.006446744 | 0.02454702  | 0.41486919 | -0.8839835 | 0.37015944 | -0.816267975 | -0.179454314 | -0.050160051 | 0.862201352 | 0.99823252  | 1.04039398  | 0.907692801  | 0.890486312 | -0.187011773  | -1.640593384 | -0.917837316 | 0.008211894  | 0.053119095 | 0.423902882  | -1.238033011 | 0.441739179  | -1.178731001 |             |
| 249.0051    | -1.9631129 | -2.461557  | 0.096377446 | 0.234849422 | 0.10683082 | -3.2266002 | 0.11862253 | -3.075550051 | -0.850384277 | -0.172178025 | 0.419833104 | 0.787264591 | 0.741839397 | -0.430827936 | 0.508493702 | -0.97393652   | -0.438129051 | -0.53757346  | 0.674484993  | 0.851489828 | 0.332761519  | -1.58776018  | 0.391760697  | -1.351954228 |             |

# Supplemental table 7

|                      |          | OvsC         |            |             |            |             |             |             |             | MOvsO      |             |             |             |             |            |             |             | MvsC        |             |           |             |             |             |             |            |             |             |             |
|----------------------|----------|--------------|------------|-------------|------------|-------------|-------------|-------------|-------------|------------|-------------|-------------|-------------|-------------|------------|-------------|-------------|-------------|-------------|-----------|-------------|-------------|-------------|-------------|------------|-------------|-------------|-------------|
| ID                   | m/z      | statistic_Ov | pvalue_Ovs | adj_pval_Ov | imputed_   | fold_change | log2_fold_c | fold_change | log2_fold_c | imputed_   | fold_change | log2_fold_c | fold_change | log2_fold_c | imputed_   | fold_change | log2_fold_c | fold_change | log2_fold_c | imputed_  | fold_change | log2_fold_c | fold_change | log2_fold_c | imputed_   | fold_change | log2_fold_c | statOvsC*st |
|                      |          | sc           | dm_OvsC    | C           | sc         | OvsC        | uted_OvsC   | caled_OvsC  | _OvsC       | OvsO       | dm_MOvsO    | vsO         | OvsO        | MOvsO       | O          | O           | _MOvsO      | sc          | dm_MvsC     | sc        | vsC         | MvsC        | uted_MvsC   | caled_MvsC  | _MvsC      | atMOvsO     | atMvsO      |             |
| Indoxylsulfuric Acid | 212.0026 | 3.26995577   | 1.97532396 | 0.01367516  | 0.05291694 | 2.94820047  | 1.55983463  | 3.89616608  | 1.96205517  | -5.3113854 | -2.5872711  | 0.00071845  | 0.25576977  | 0.18986632  | -2.3969441 | 0.1059176   | -3.2389857  | -0.9062644  | -0.4389892  | 0.3940197 | 0.67749755  | 0.53099033  | -0.9132425  | 0.57305314  | -0.8032592 | -17.367995  |             |             |
